# Supplementary material for: Epigenomic modifications induced by hatchery rearing persist in germ line cells of adult salmon after their oceanic migration
Source: PubMed Central journal article supplement (PMC8549618; doi:10.1111/eva.13235), 2021-05-04

# DMR\_1

XM\_020458937.1

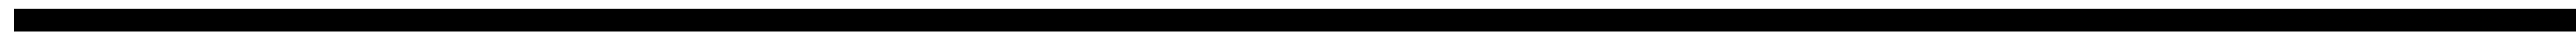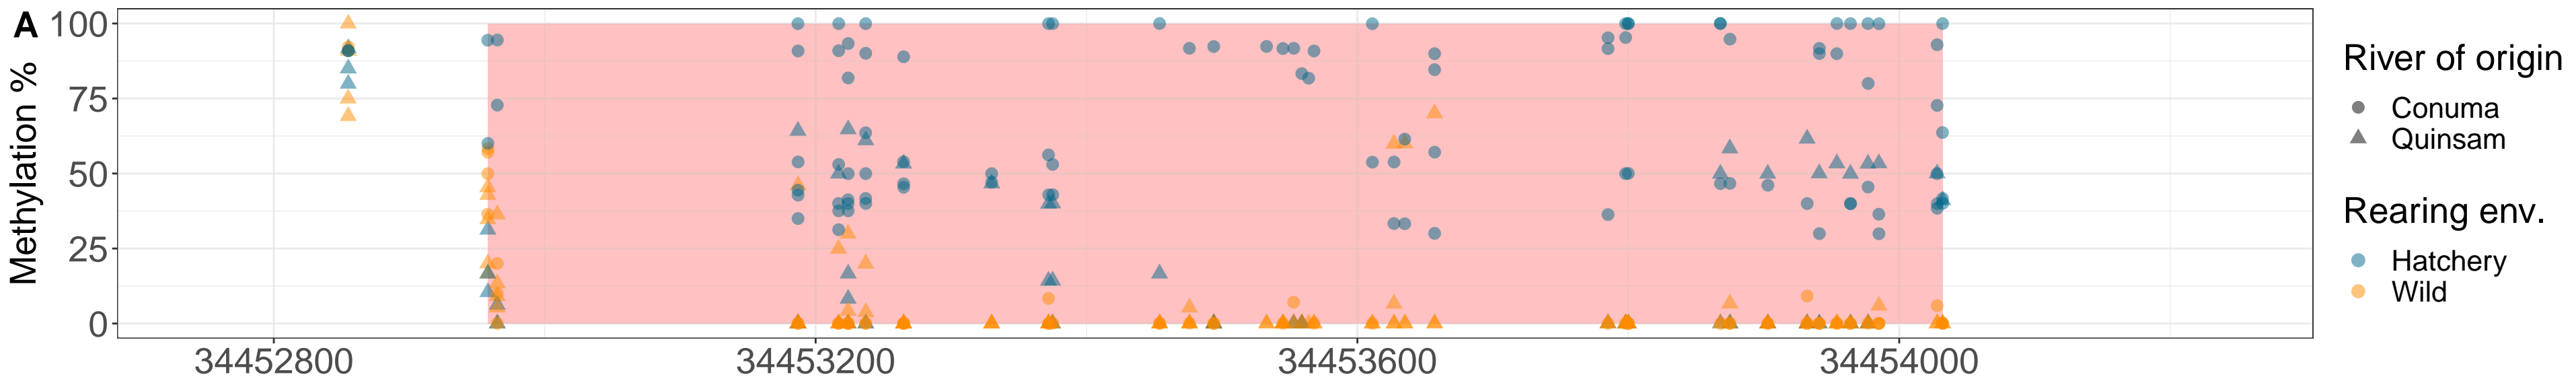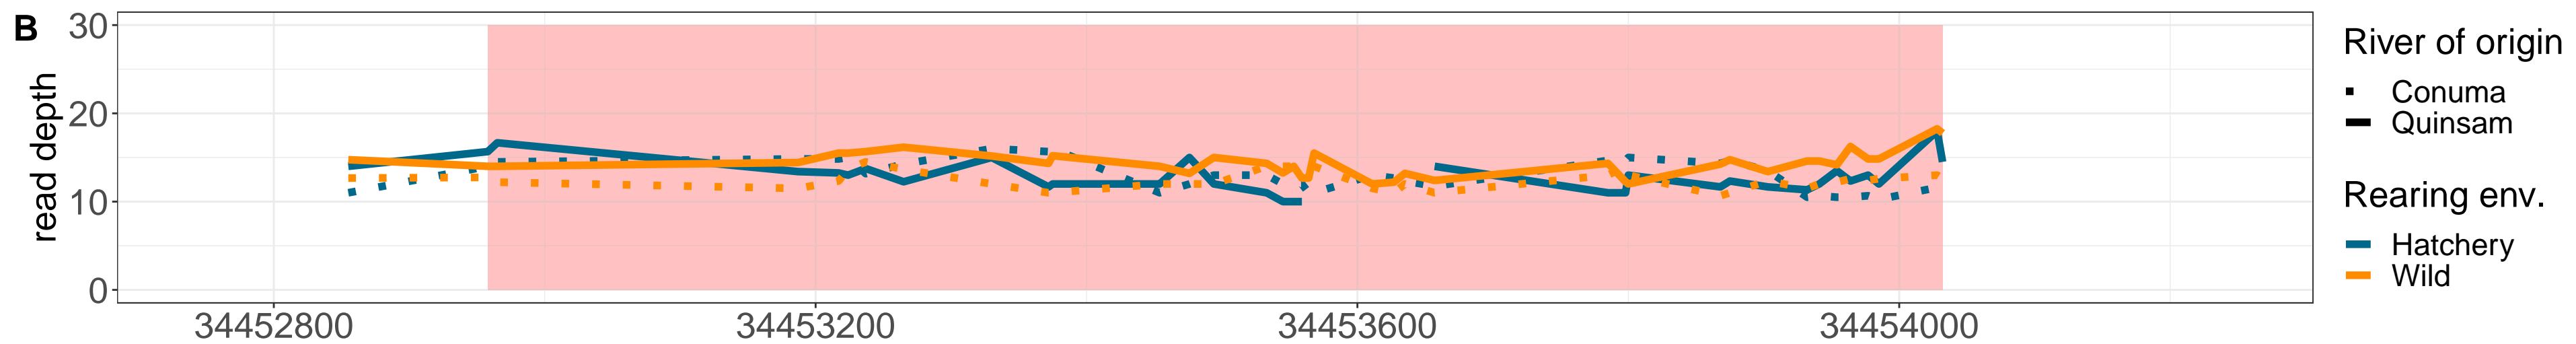

Position along chromosome 24

**A**

## DMR\_2

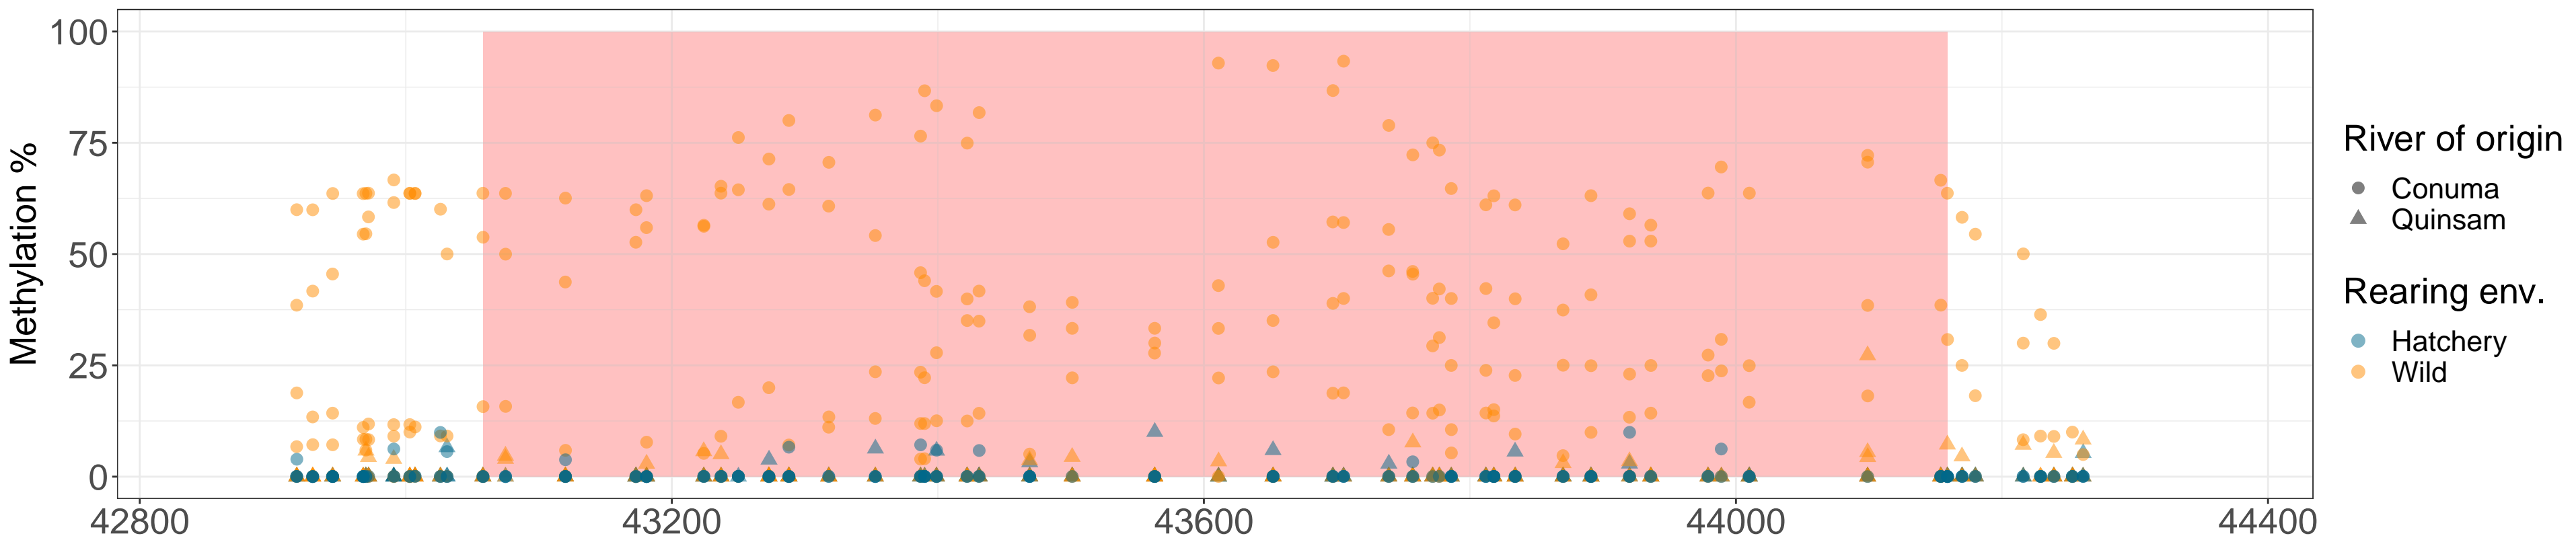**B**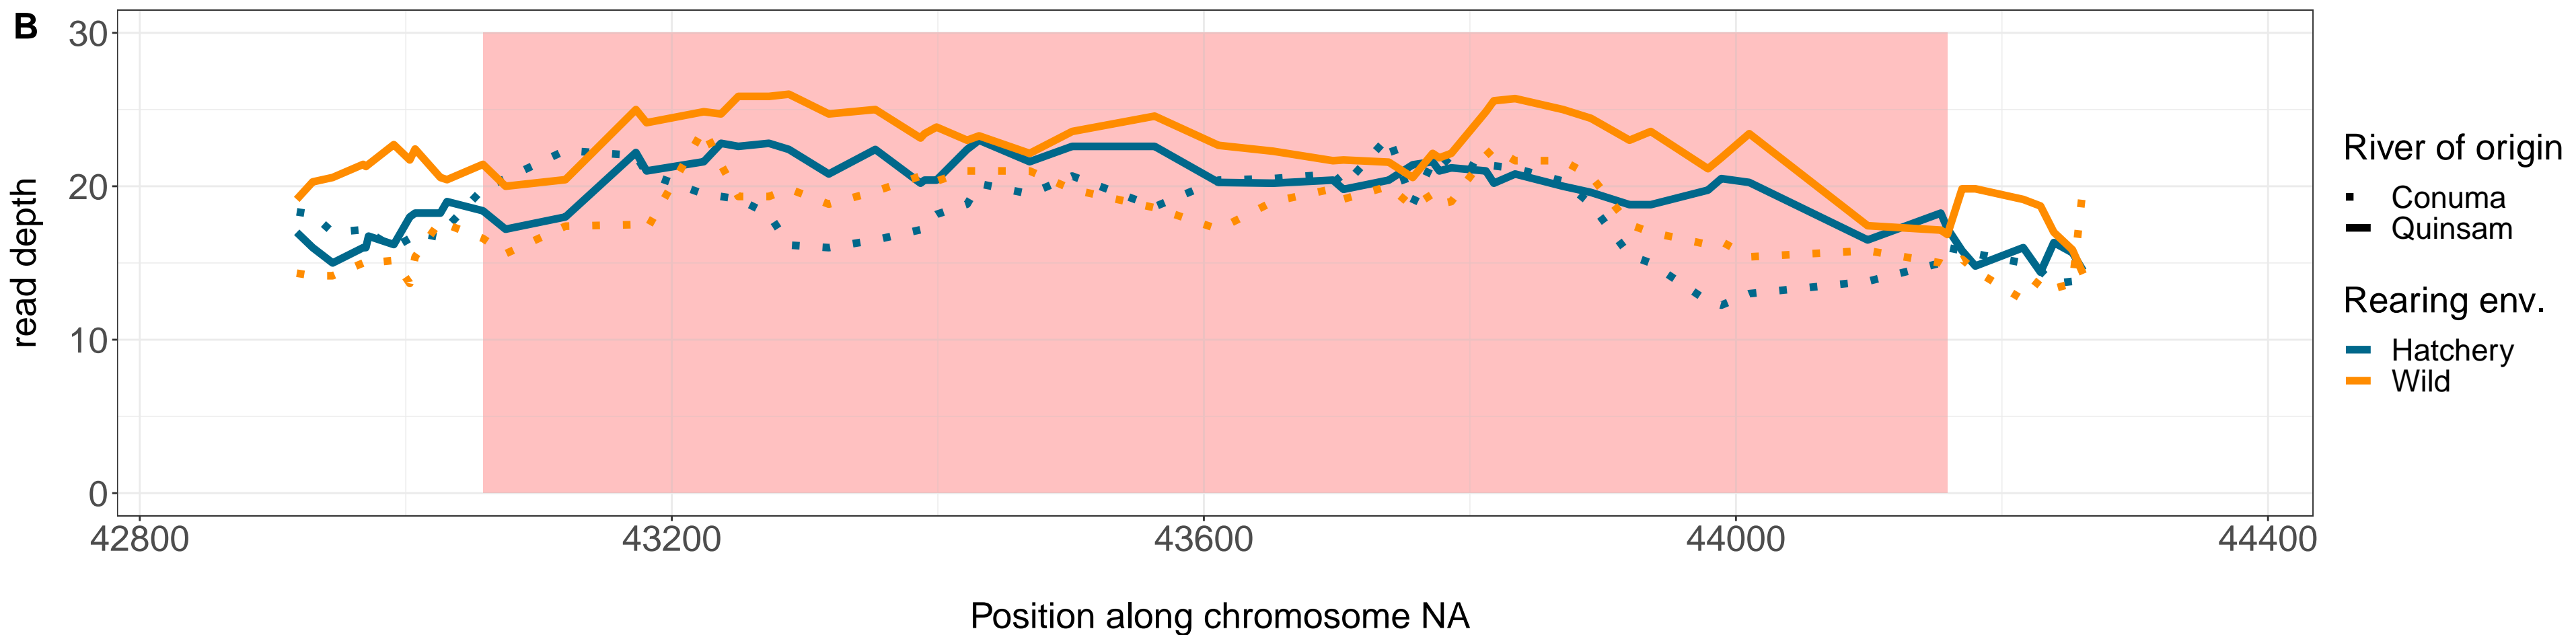

# DMR\_3

XM\_020497426.1

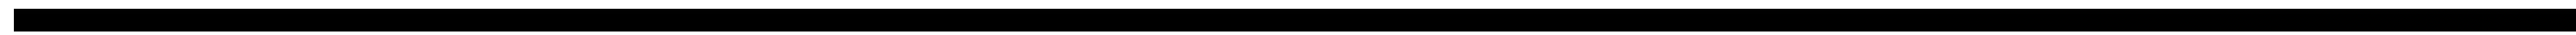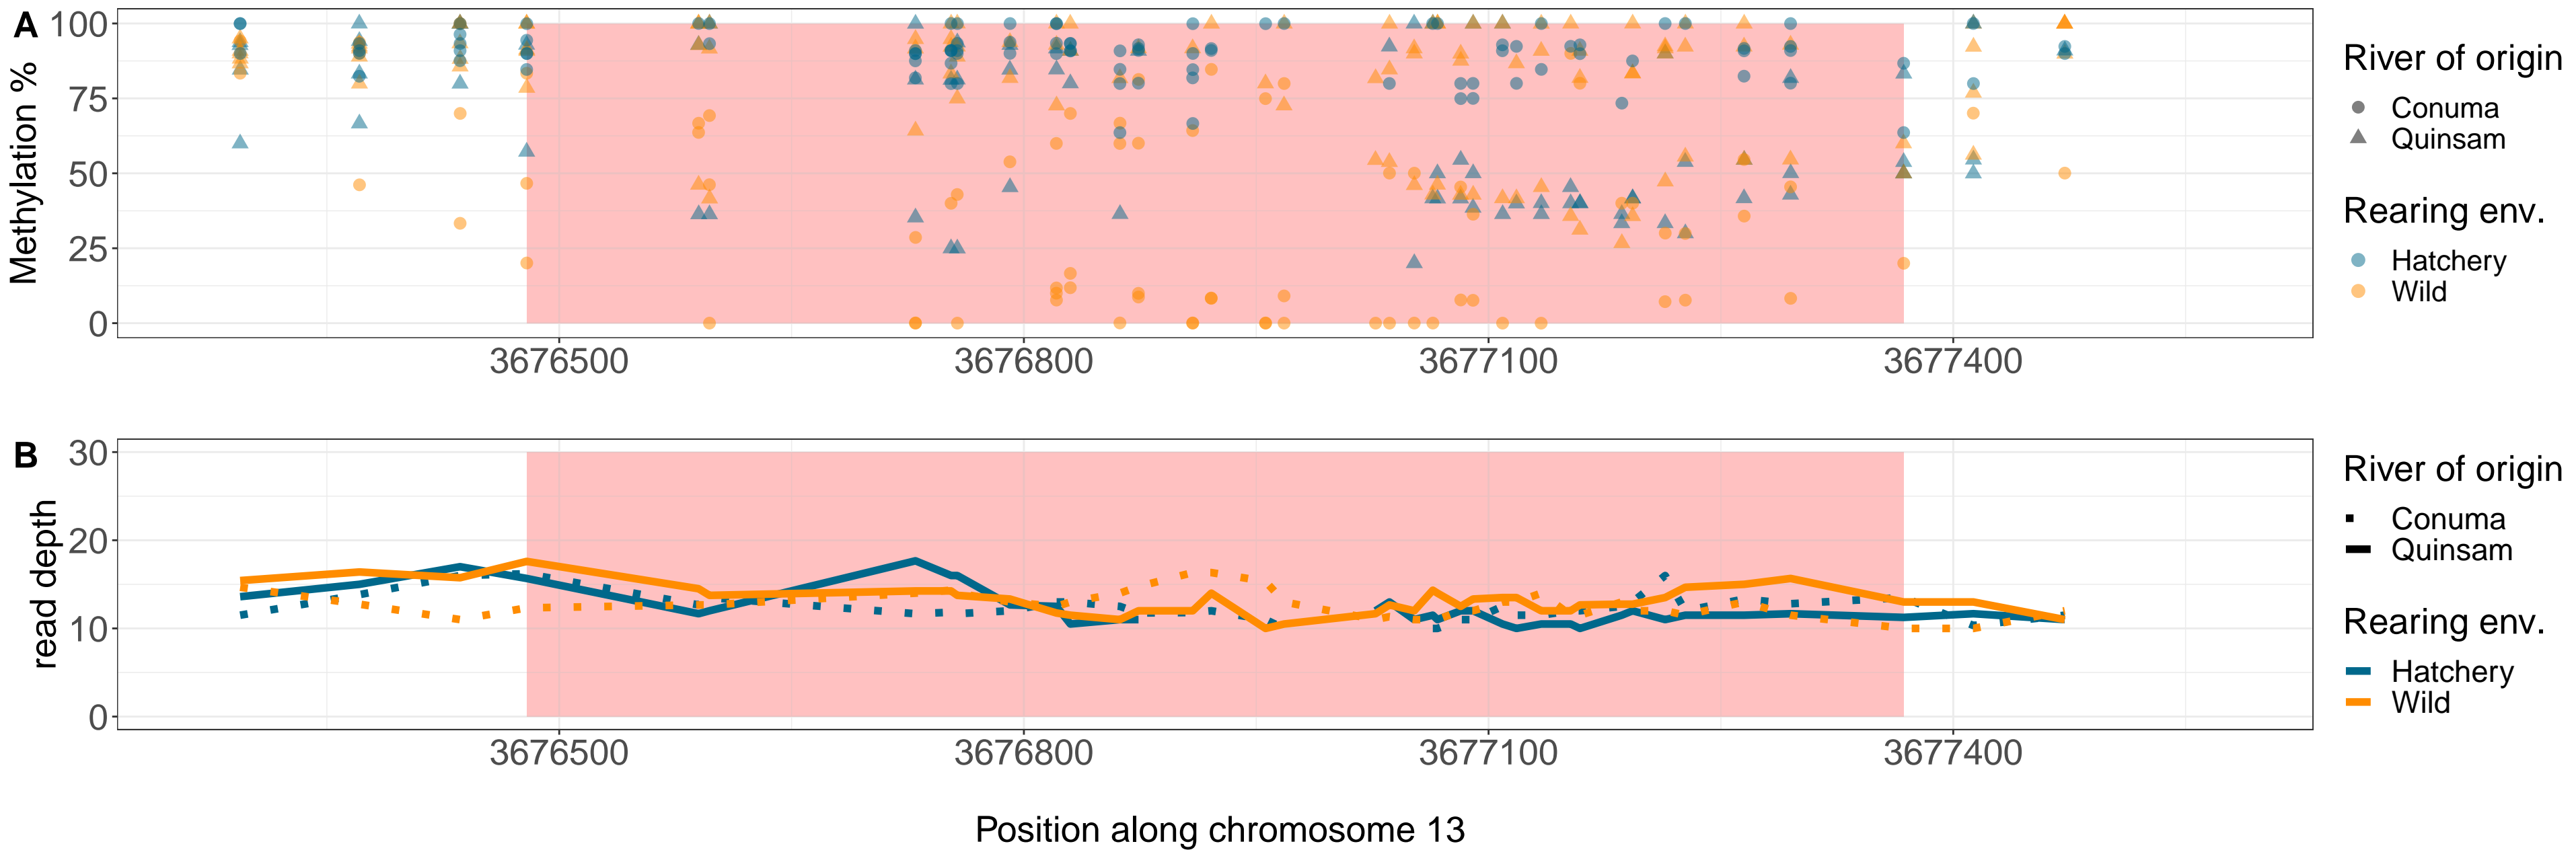

**A**

## DMR\_4

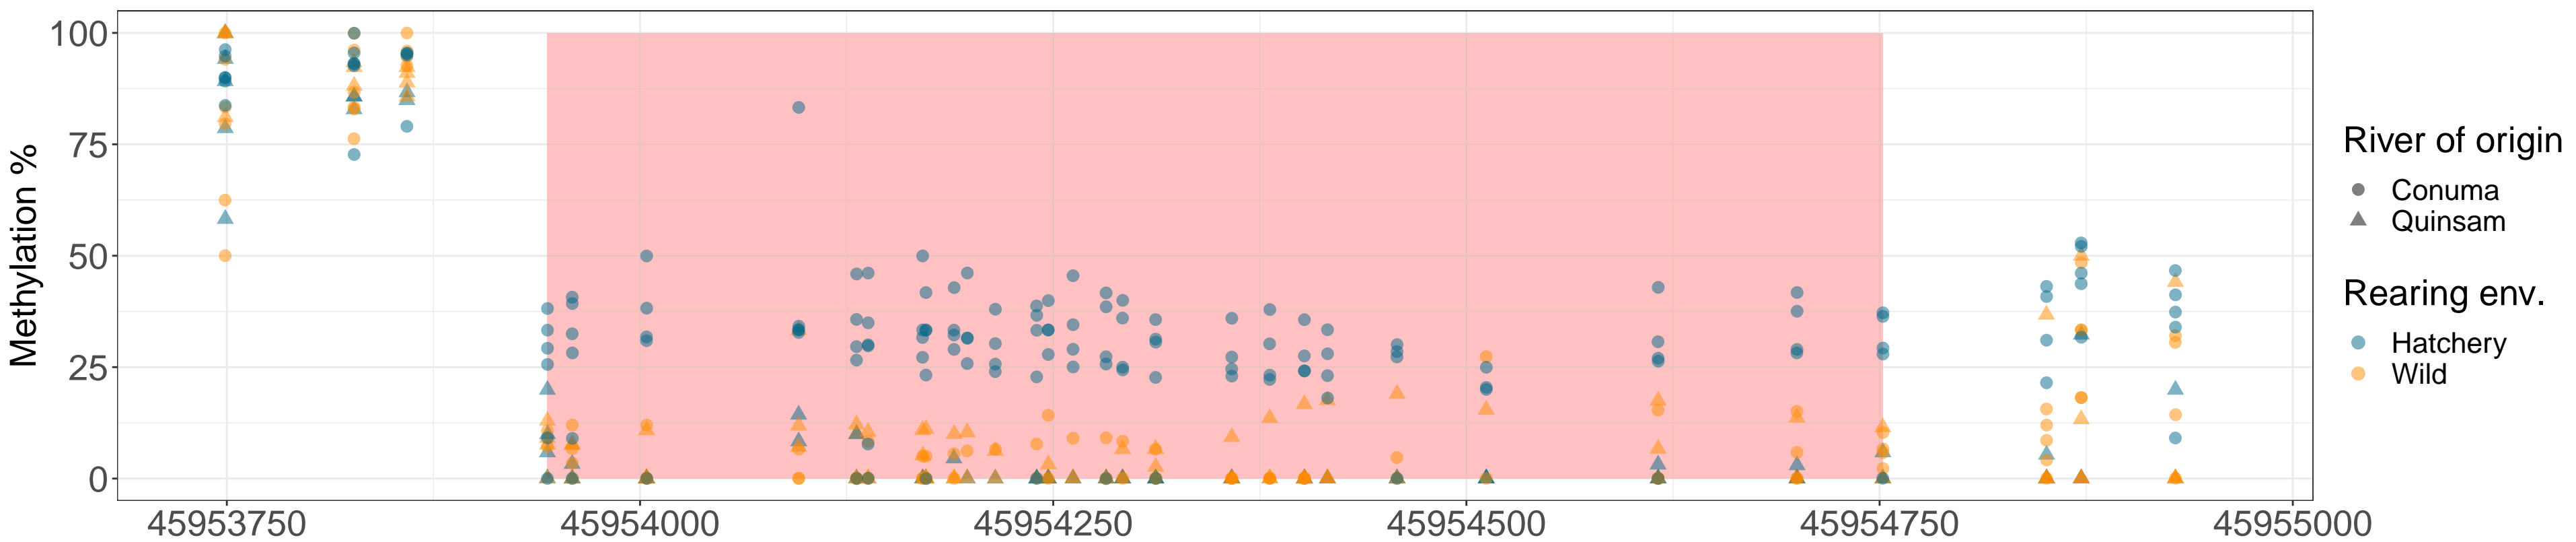**B**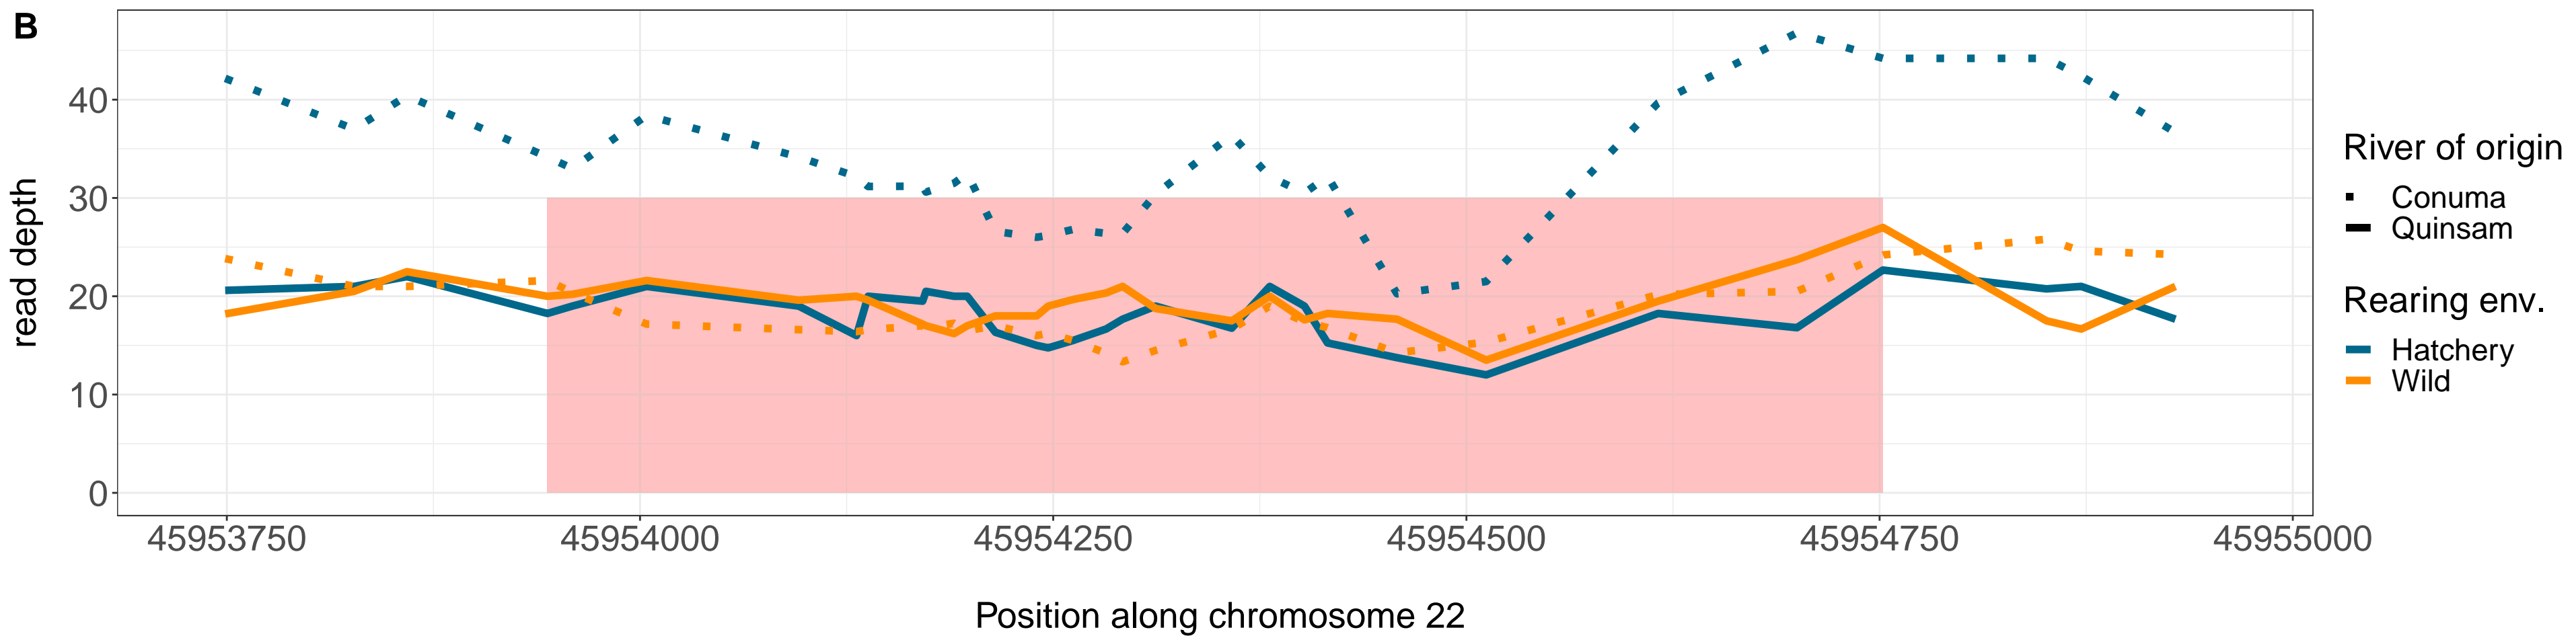

**A**

## DMR\_5

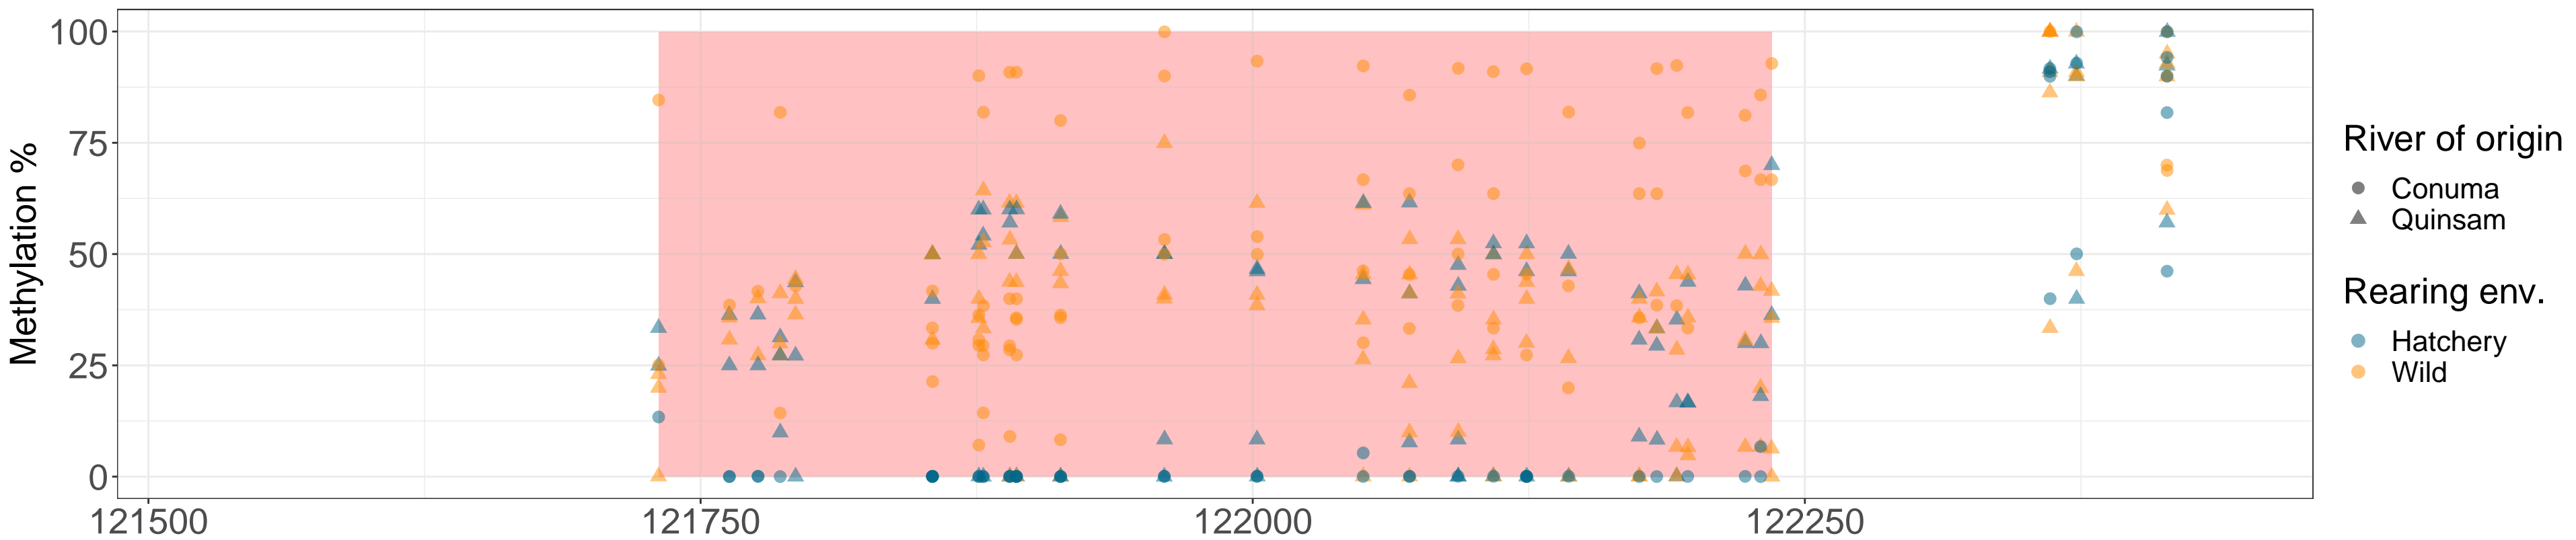**B**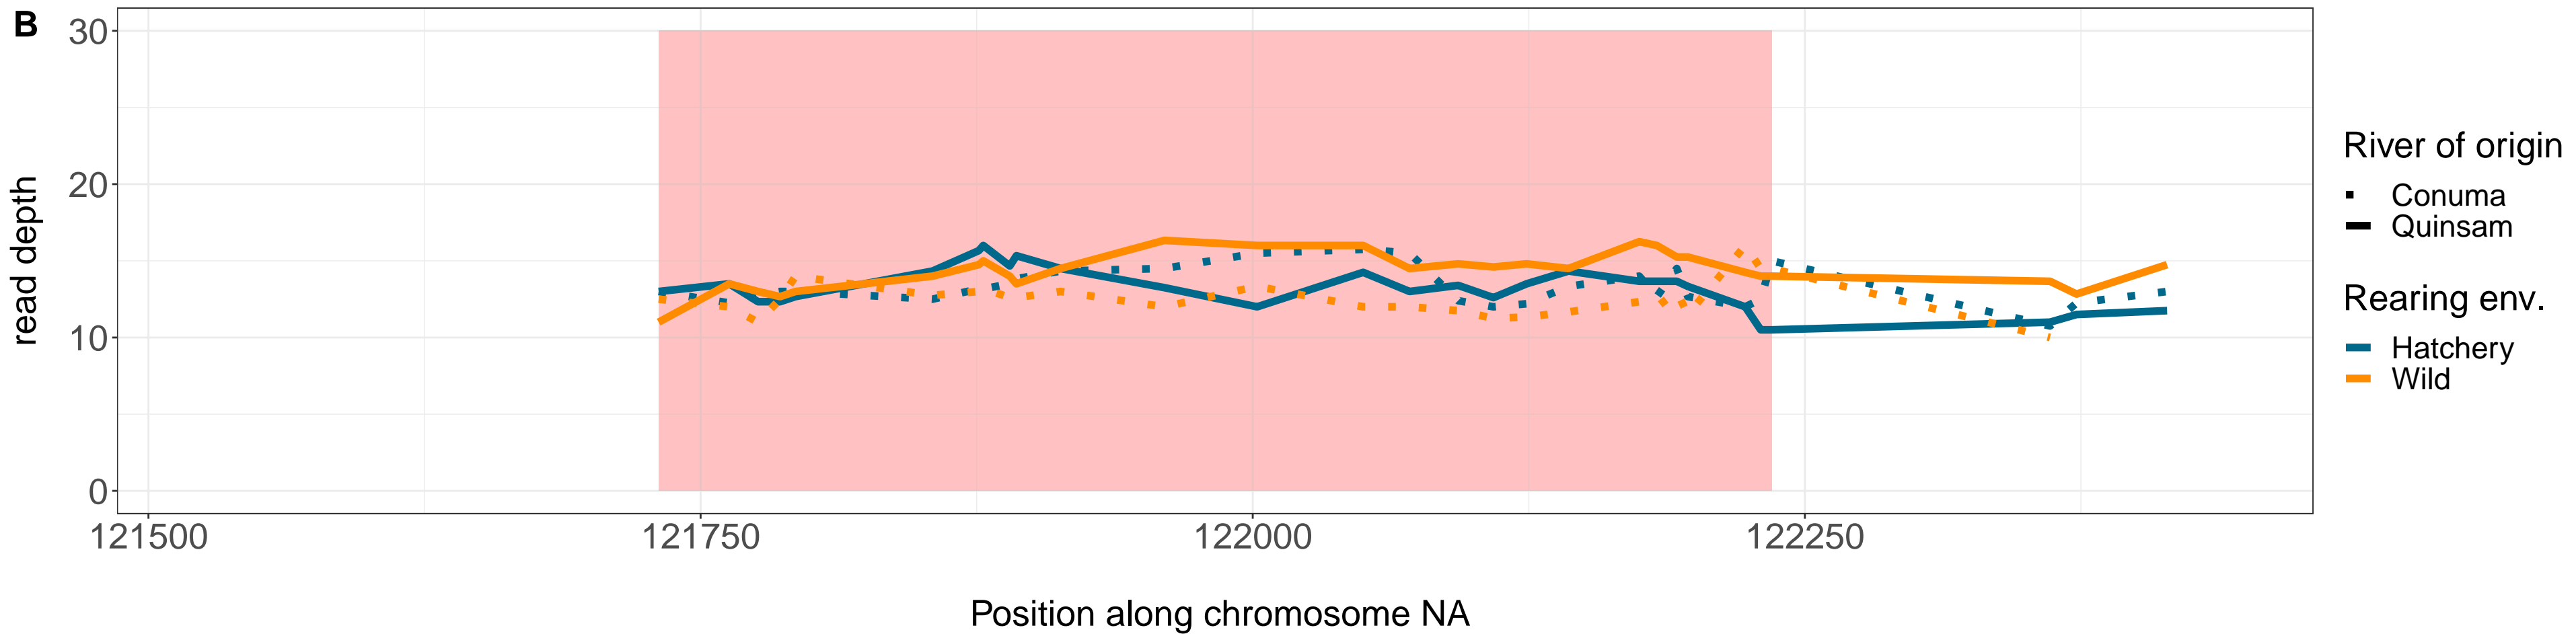

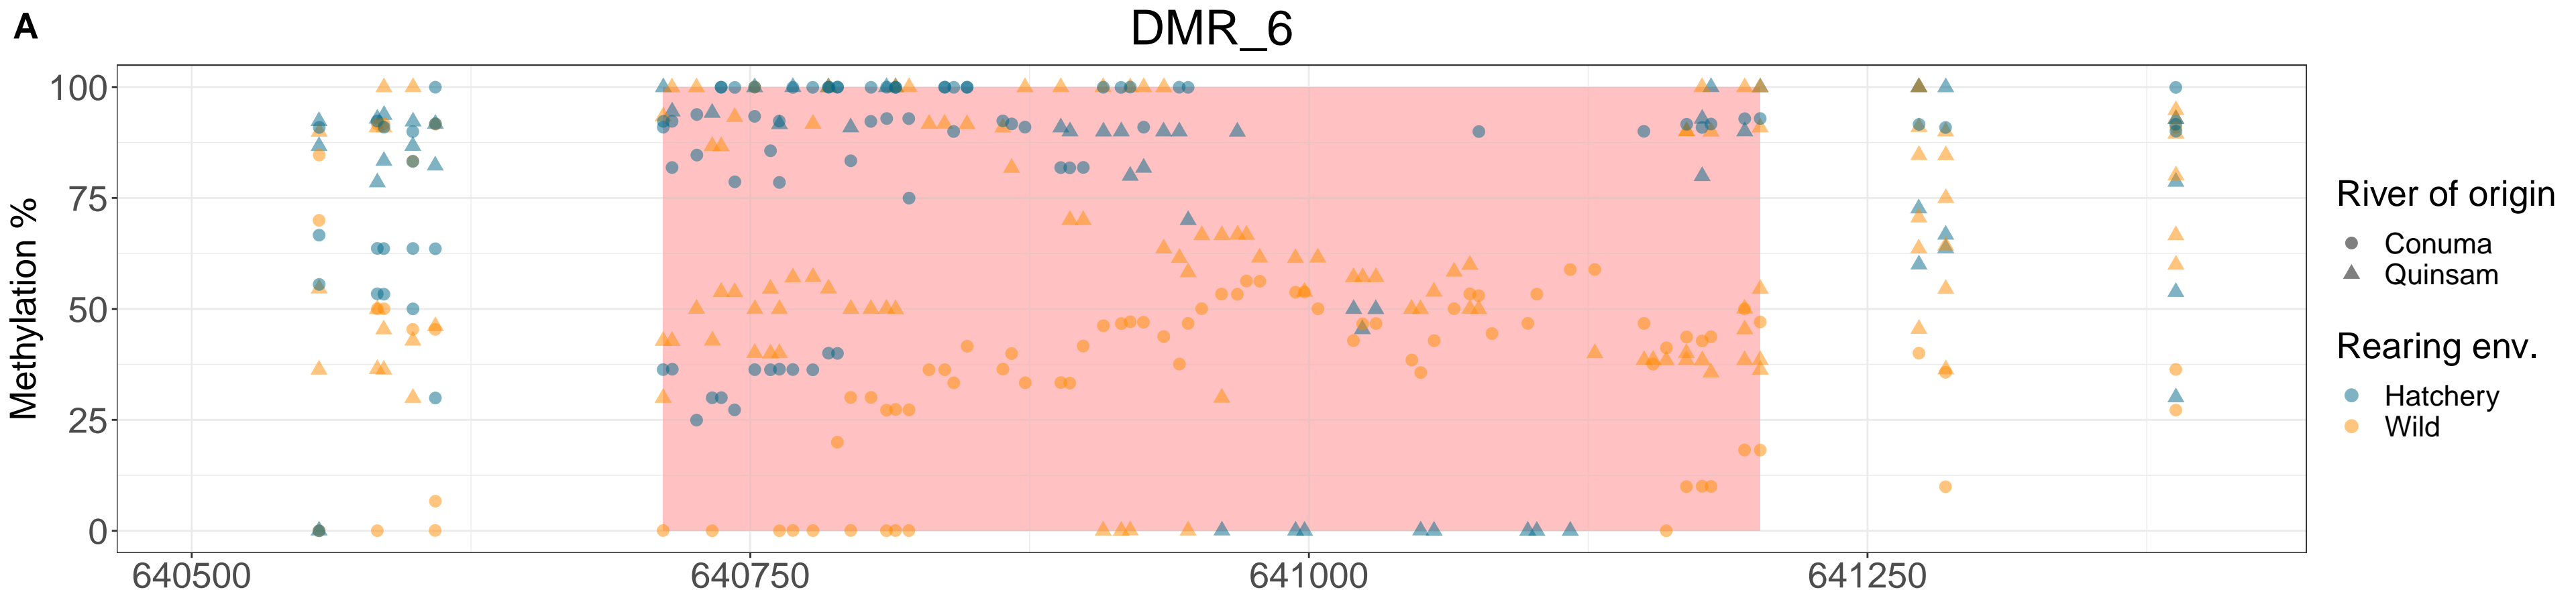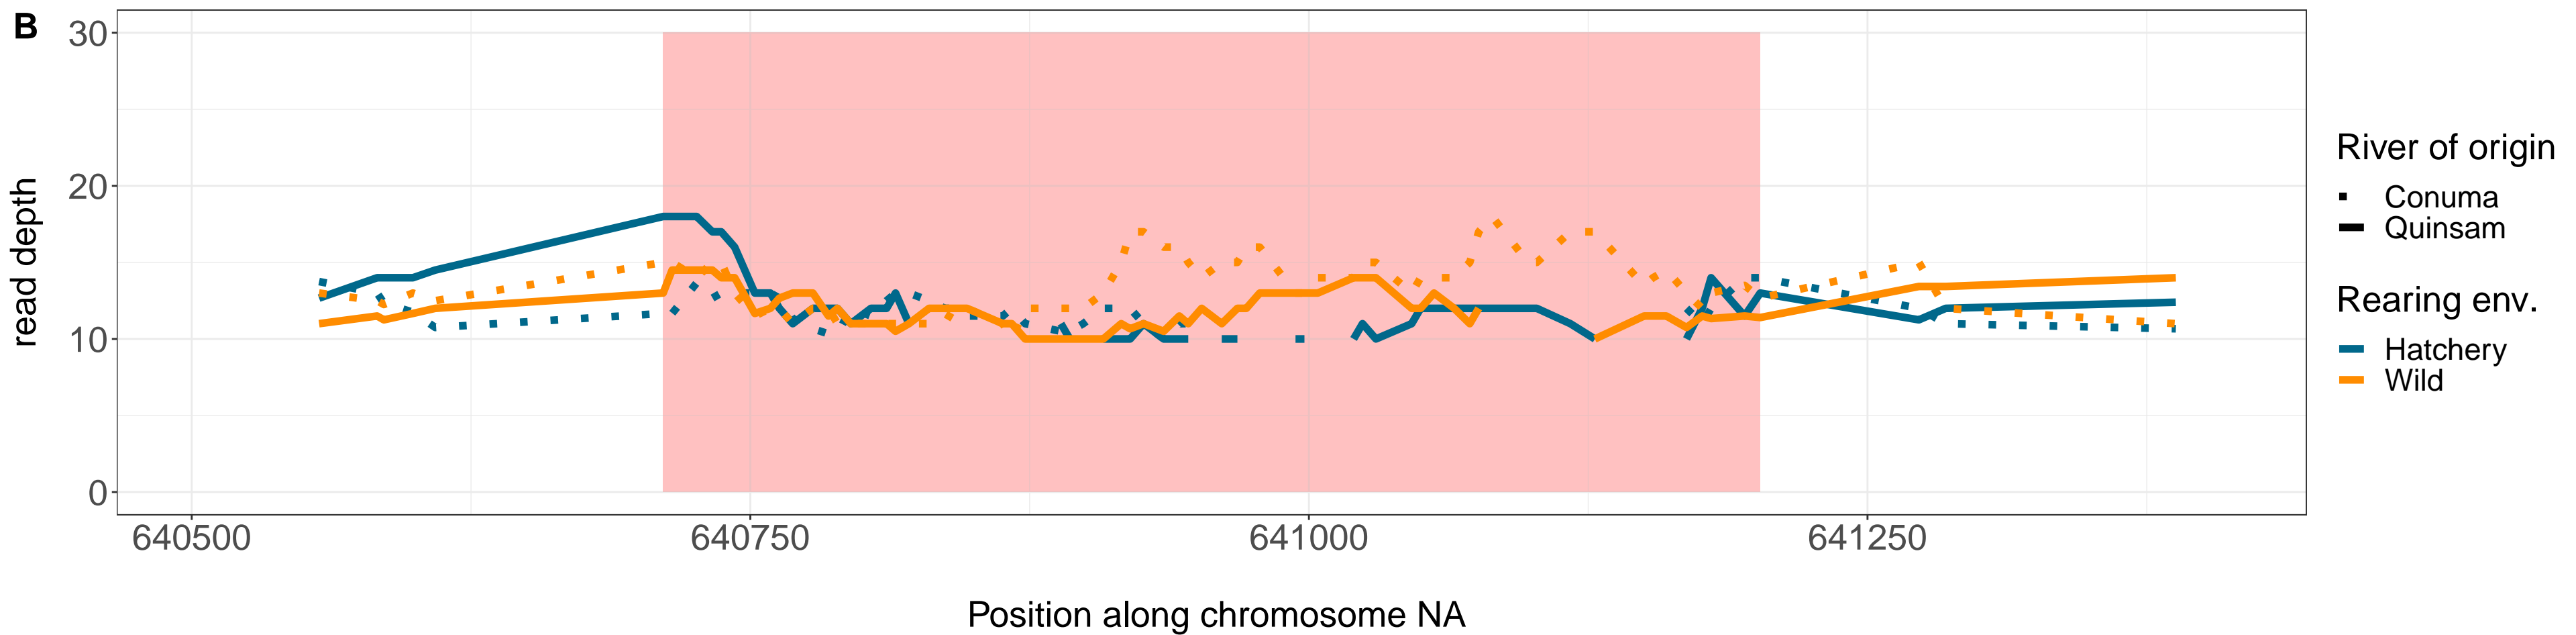

**A**

DMR\_7

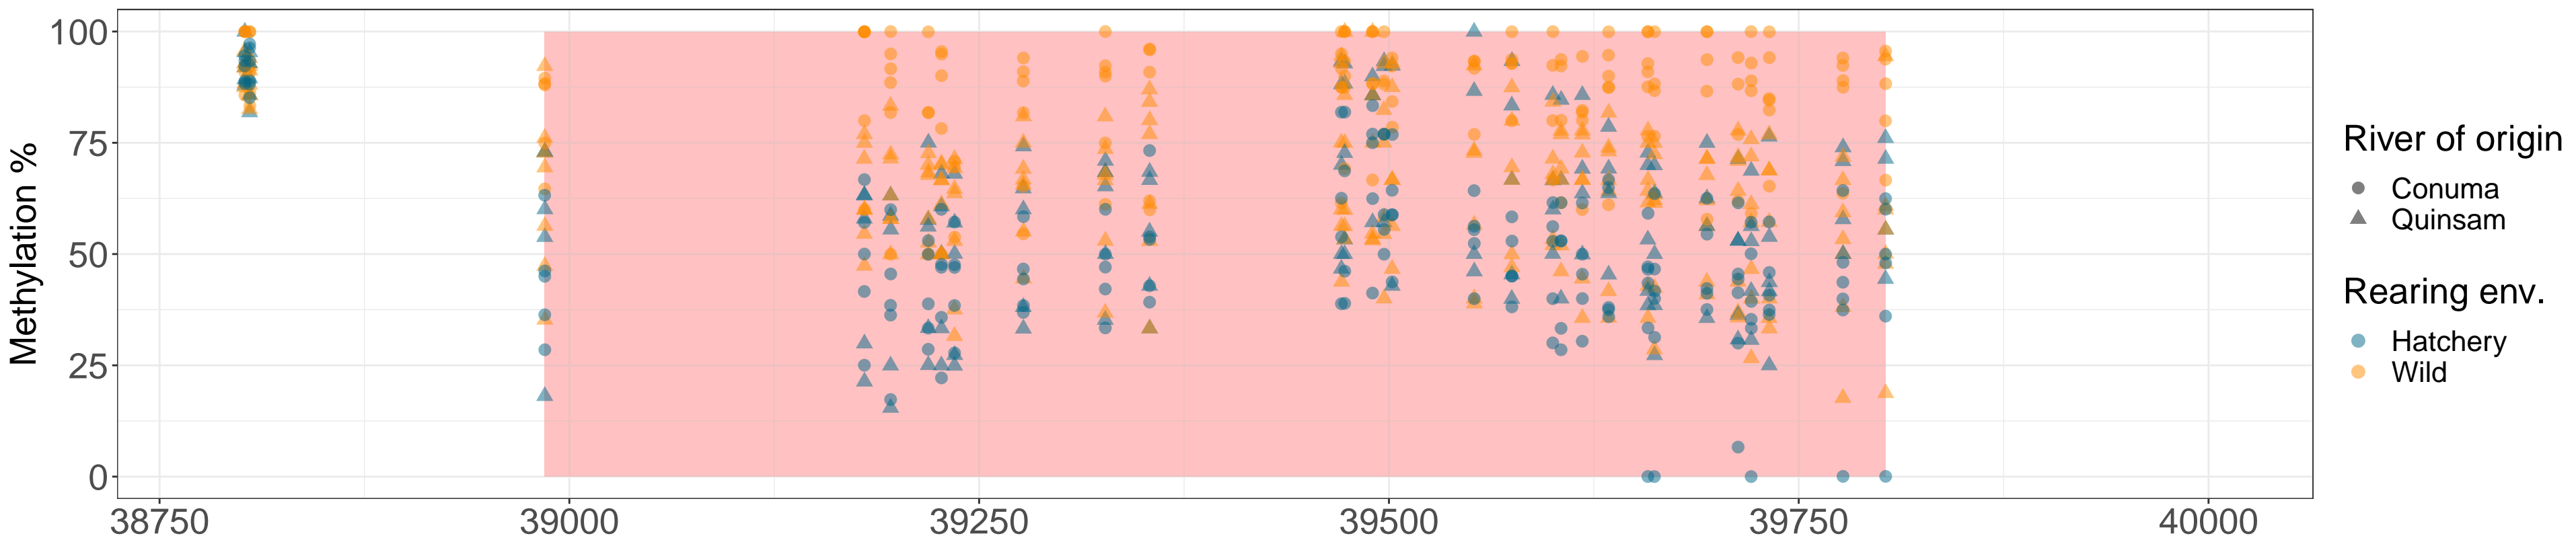**B**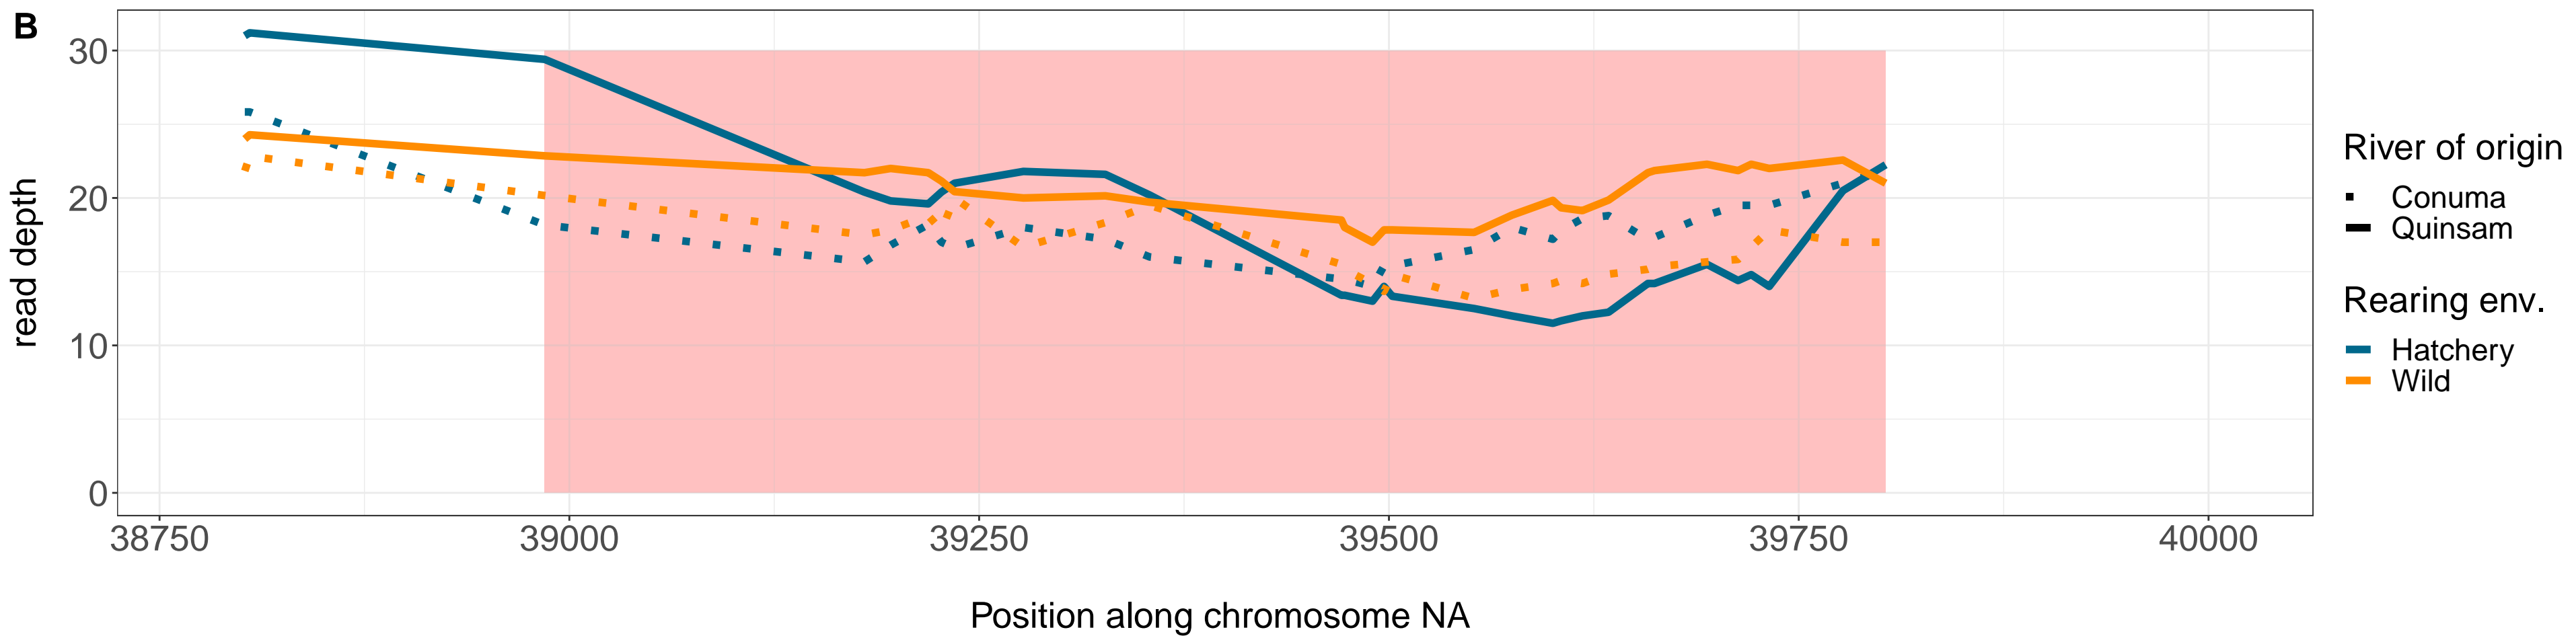

**A**

## DMR\_8

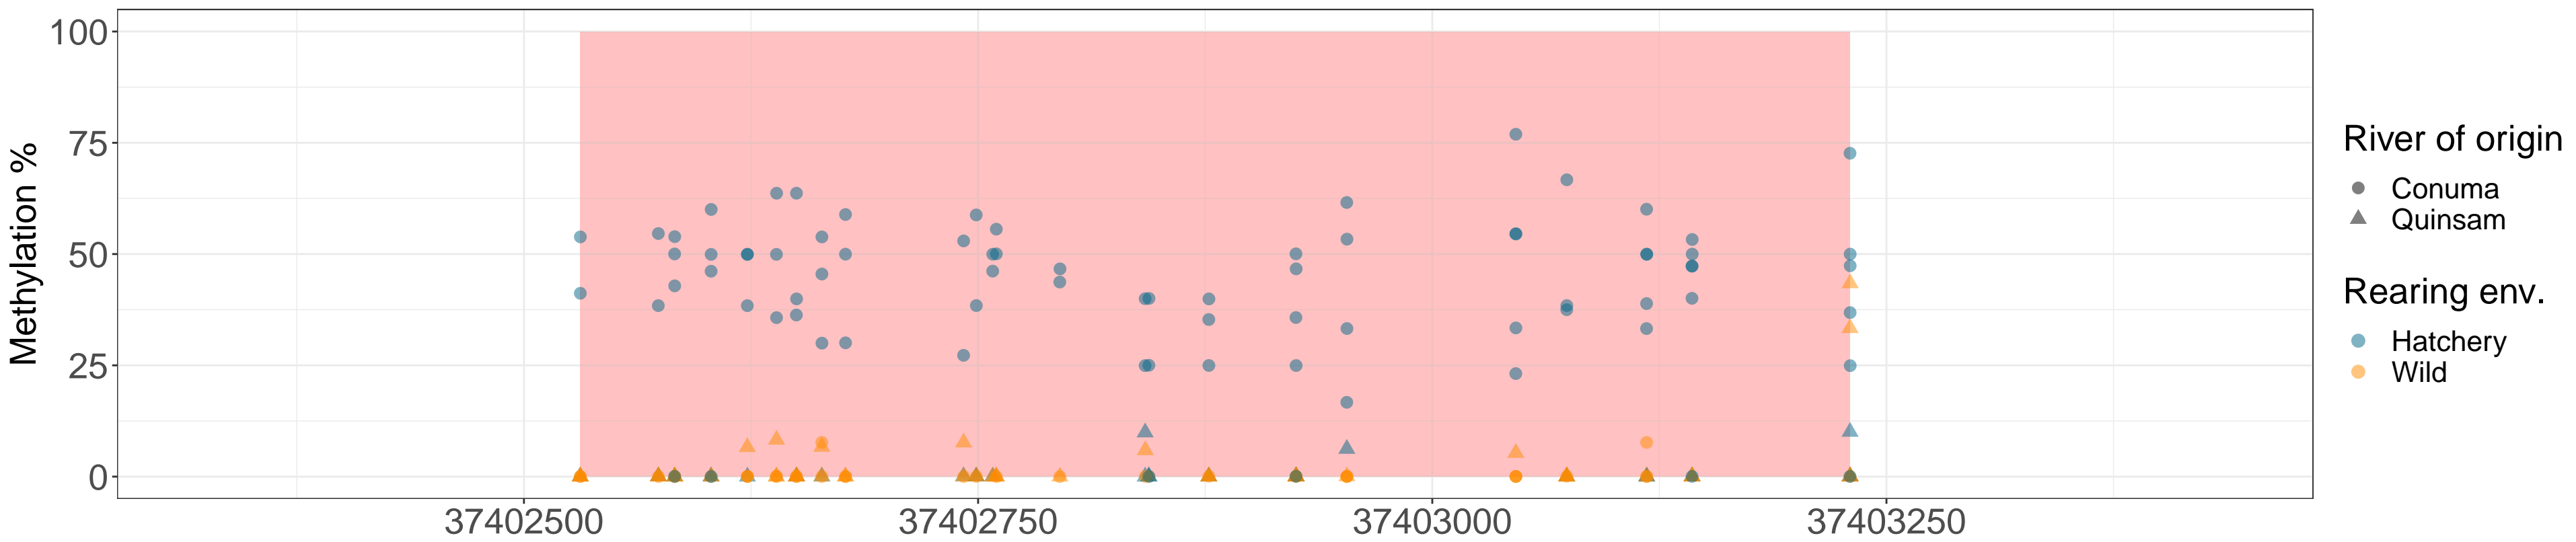**B**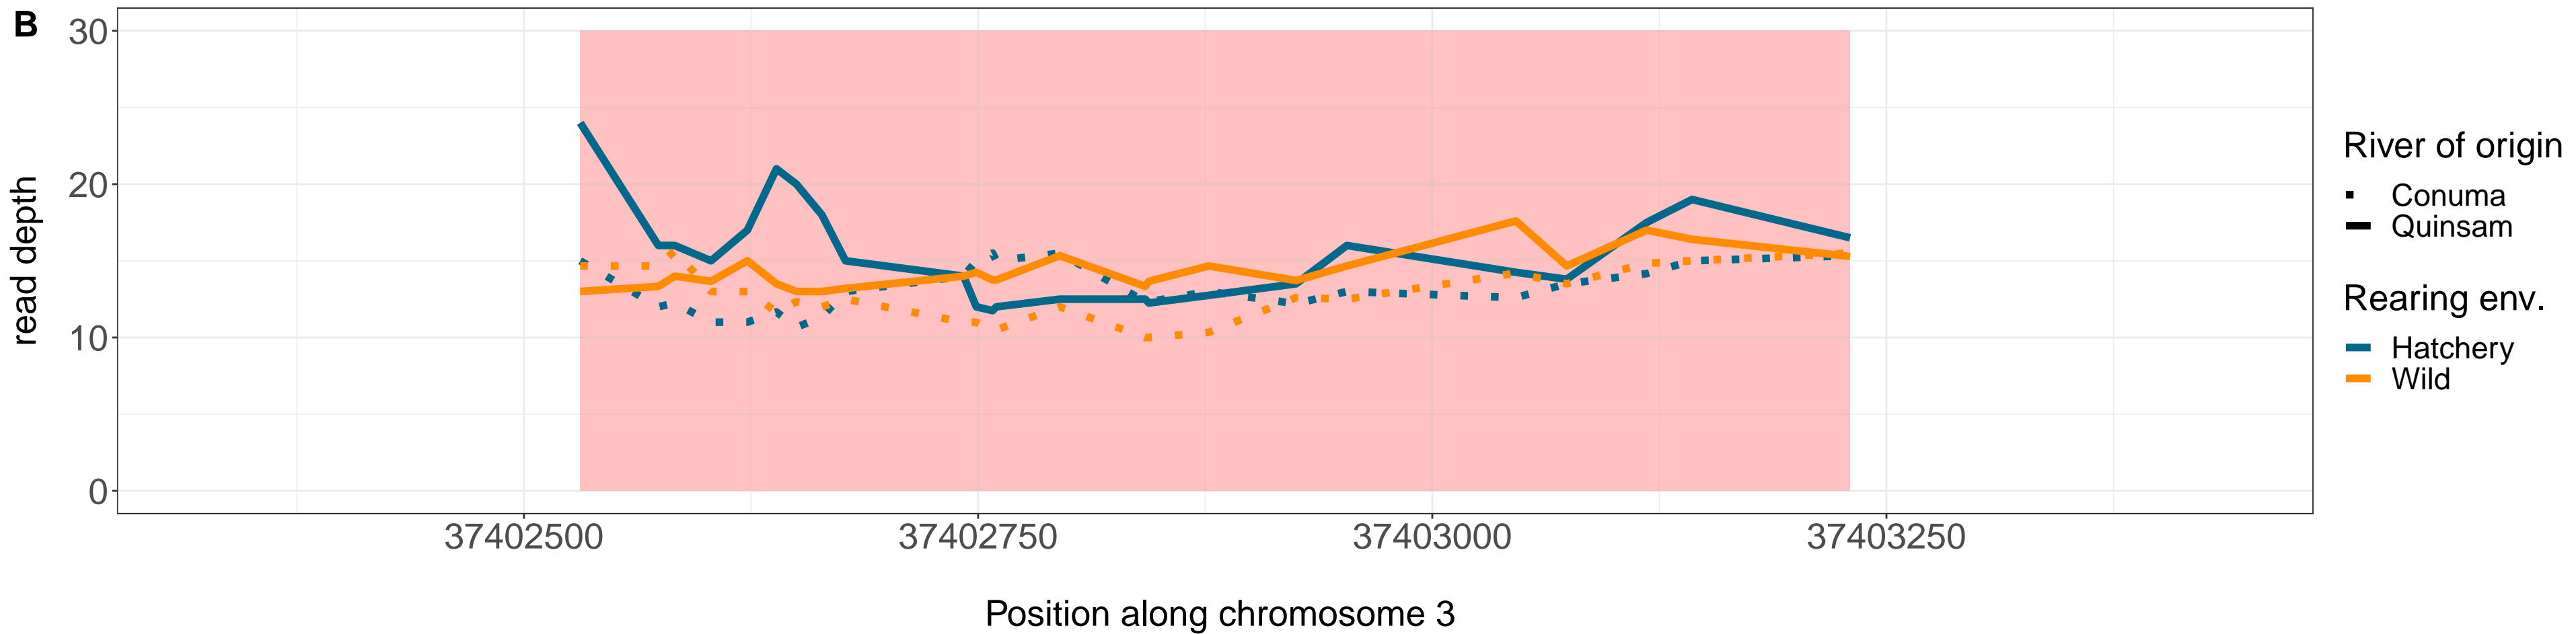



# DMR\_9

XR\_002255532.1

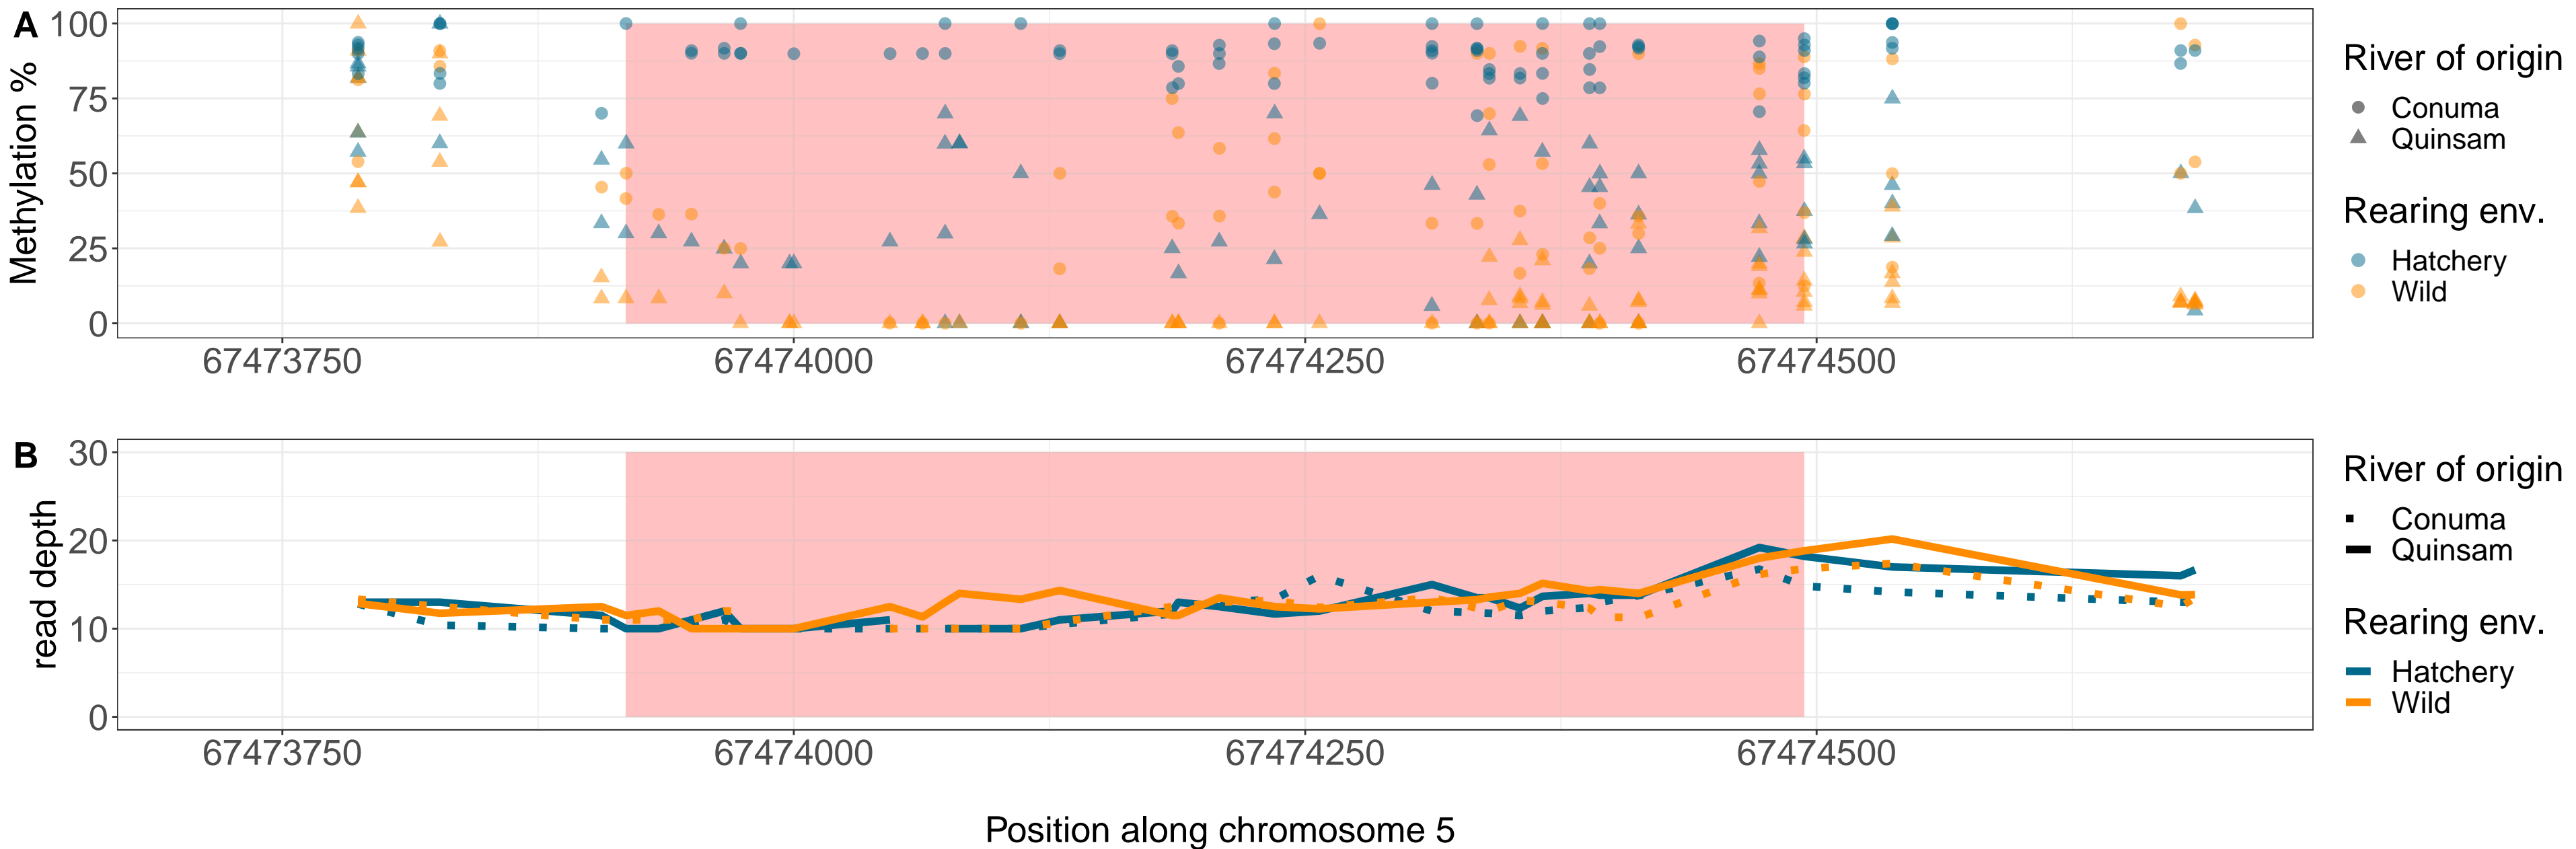

**A**

## DMR\_10

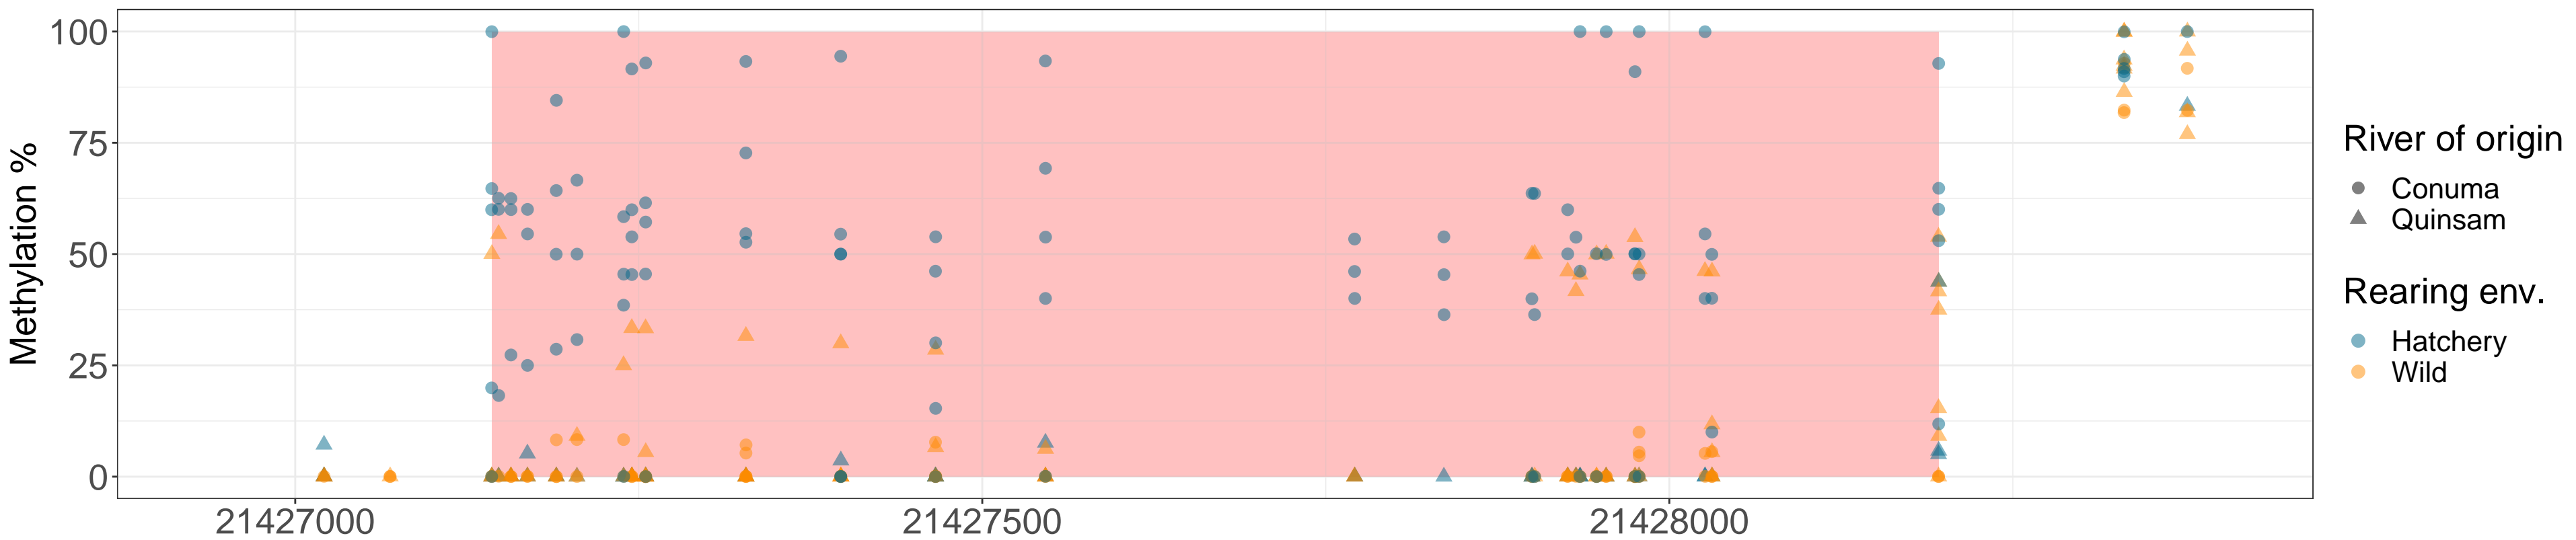**B**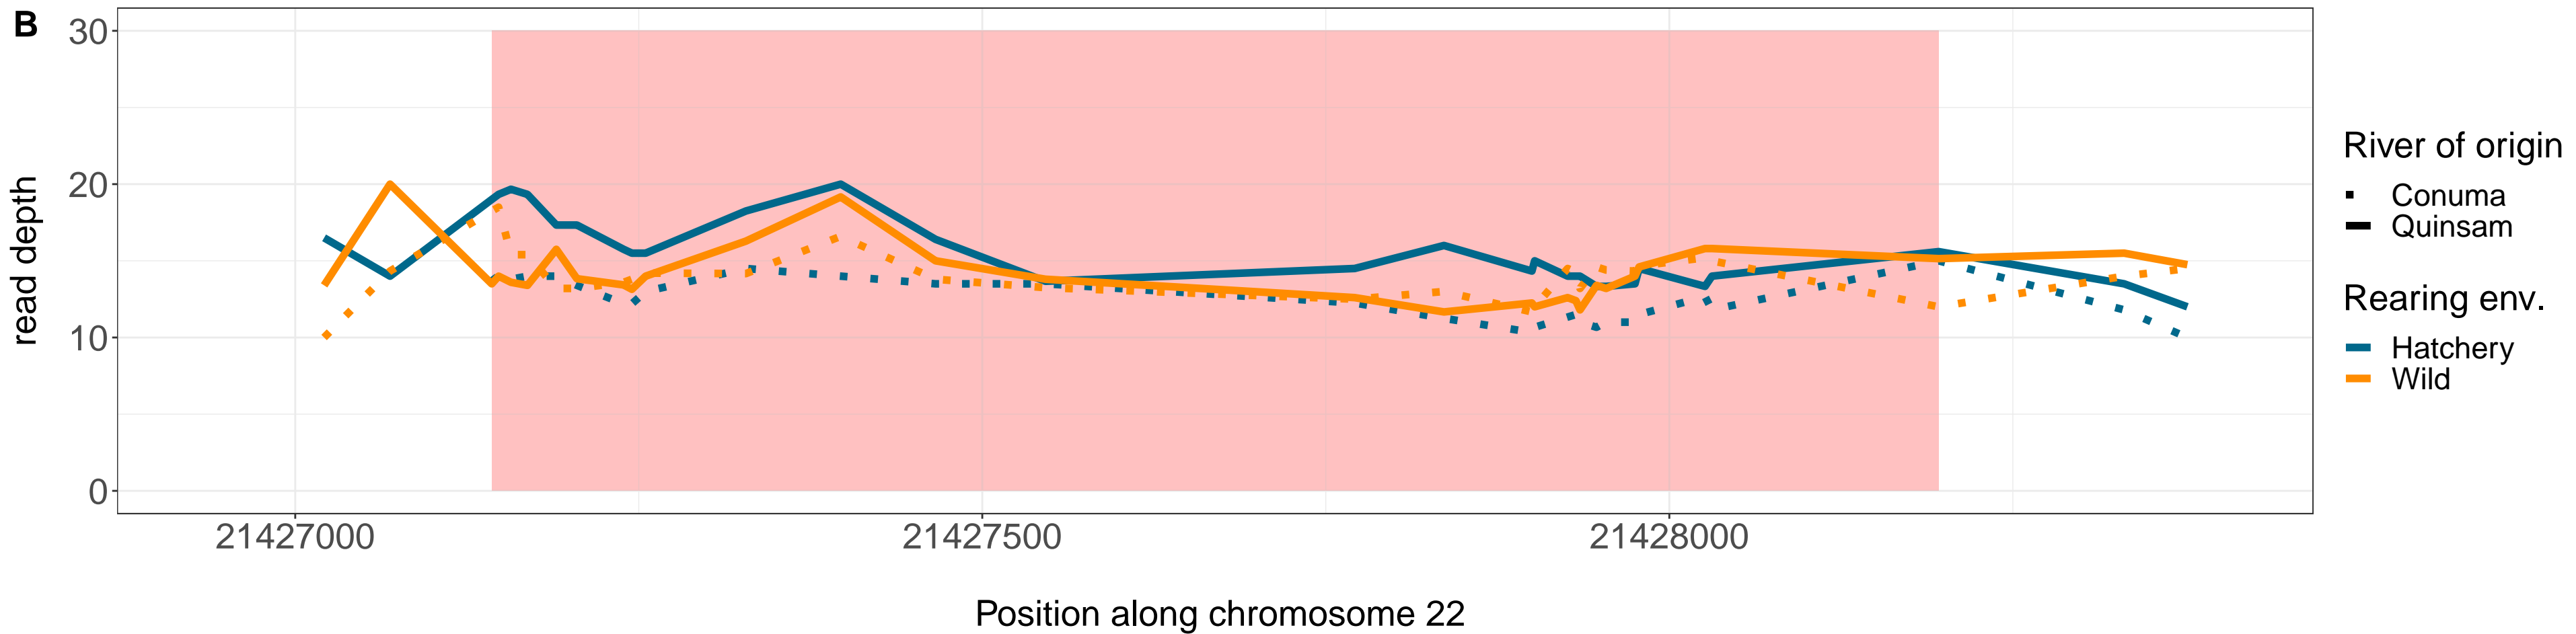

# DMR\_11

XM\_020495136.1

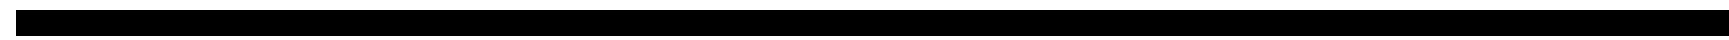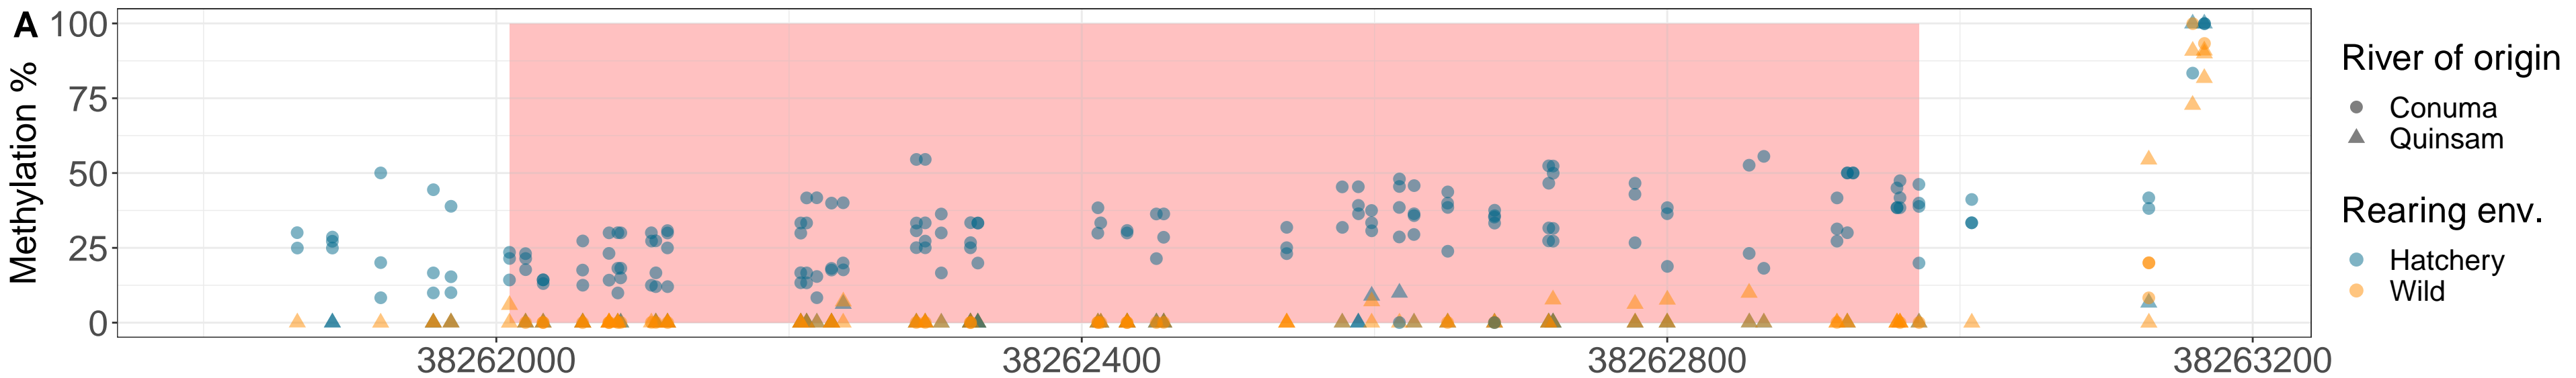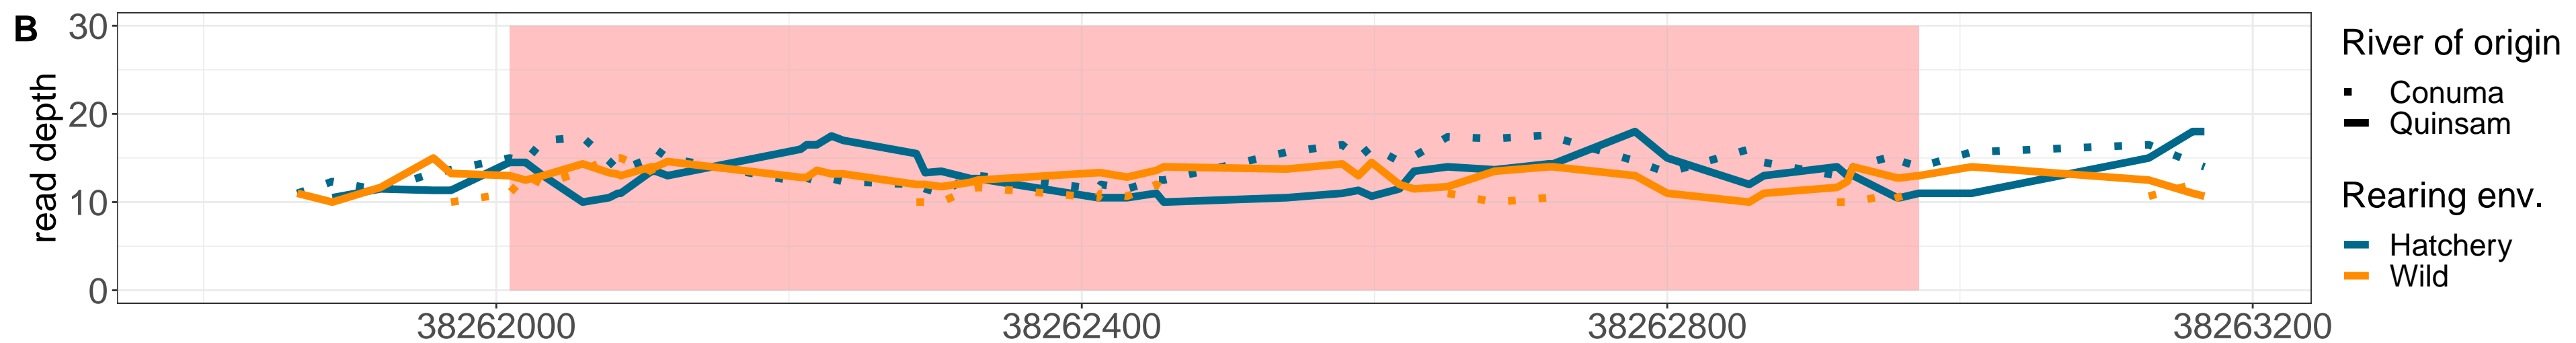

Position along chromosome 11

**A**

## DMR\_12

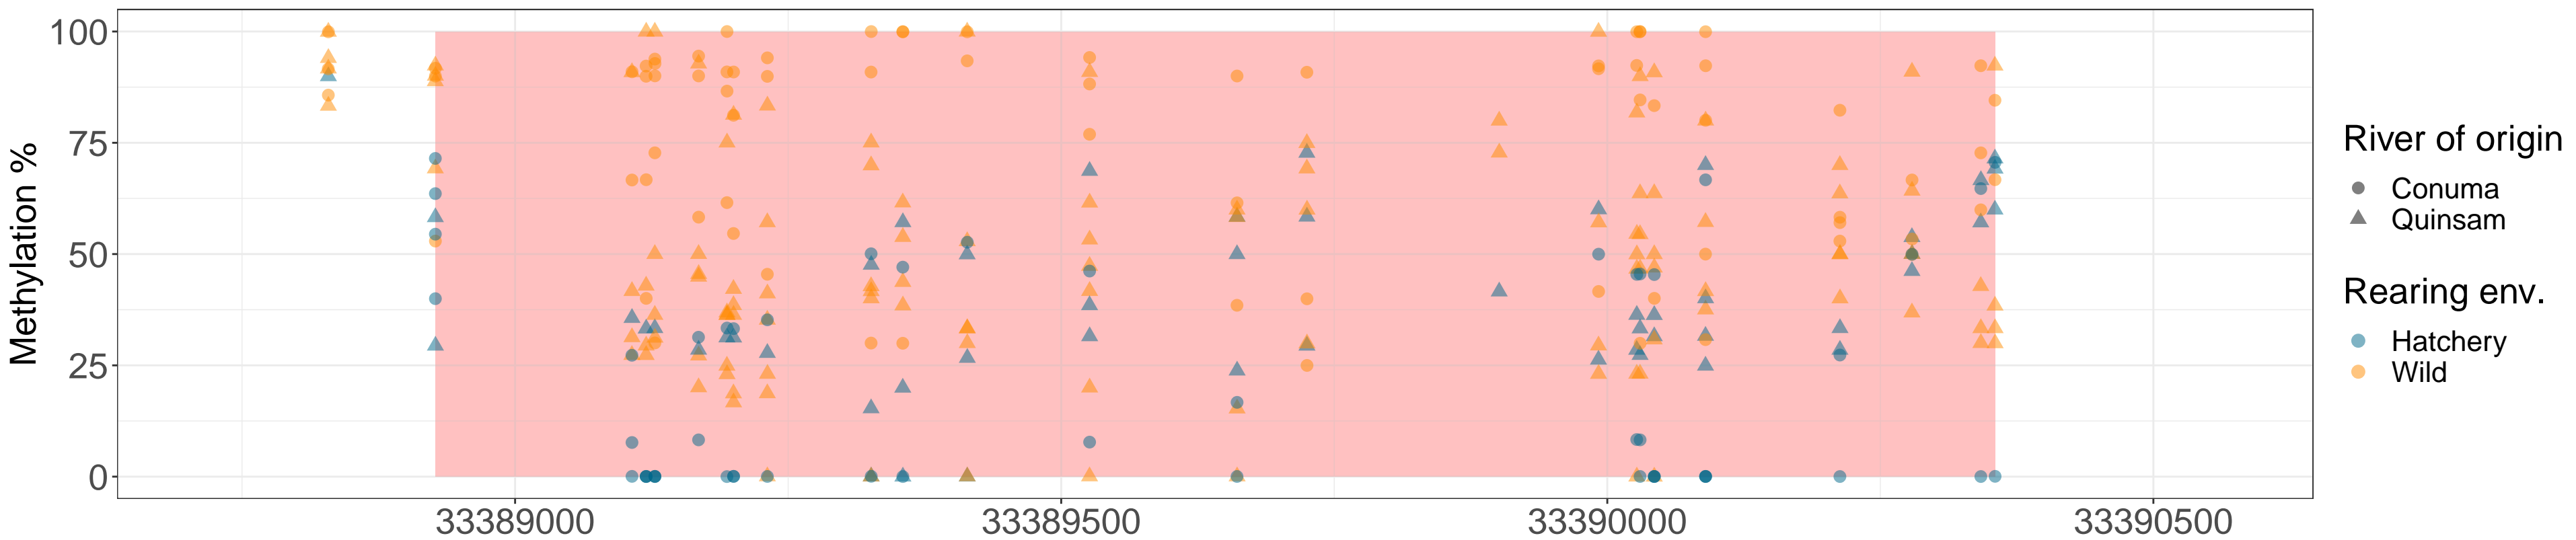**B**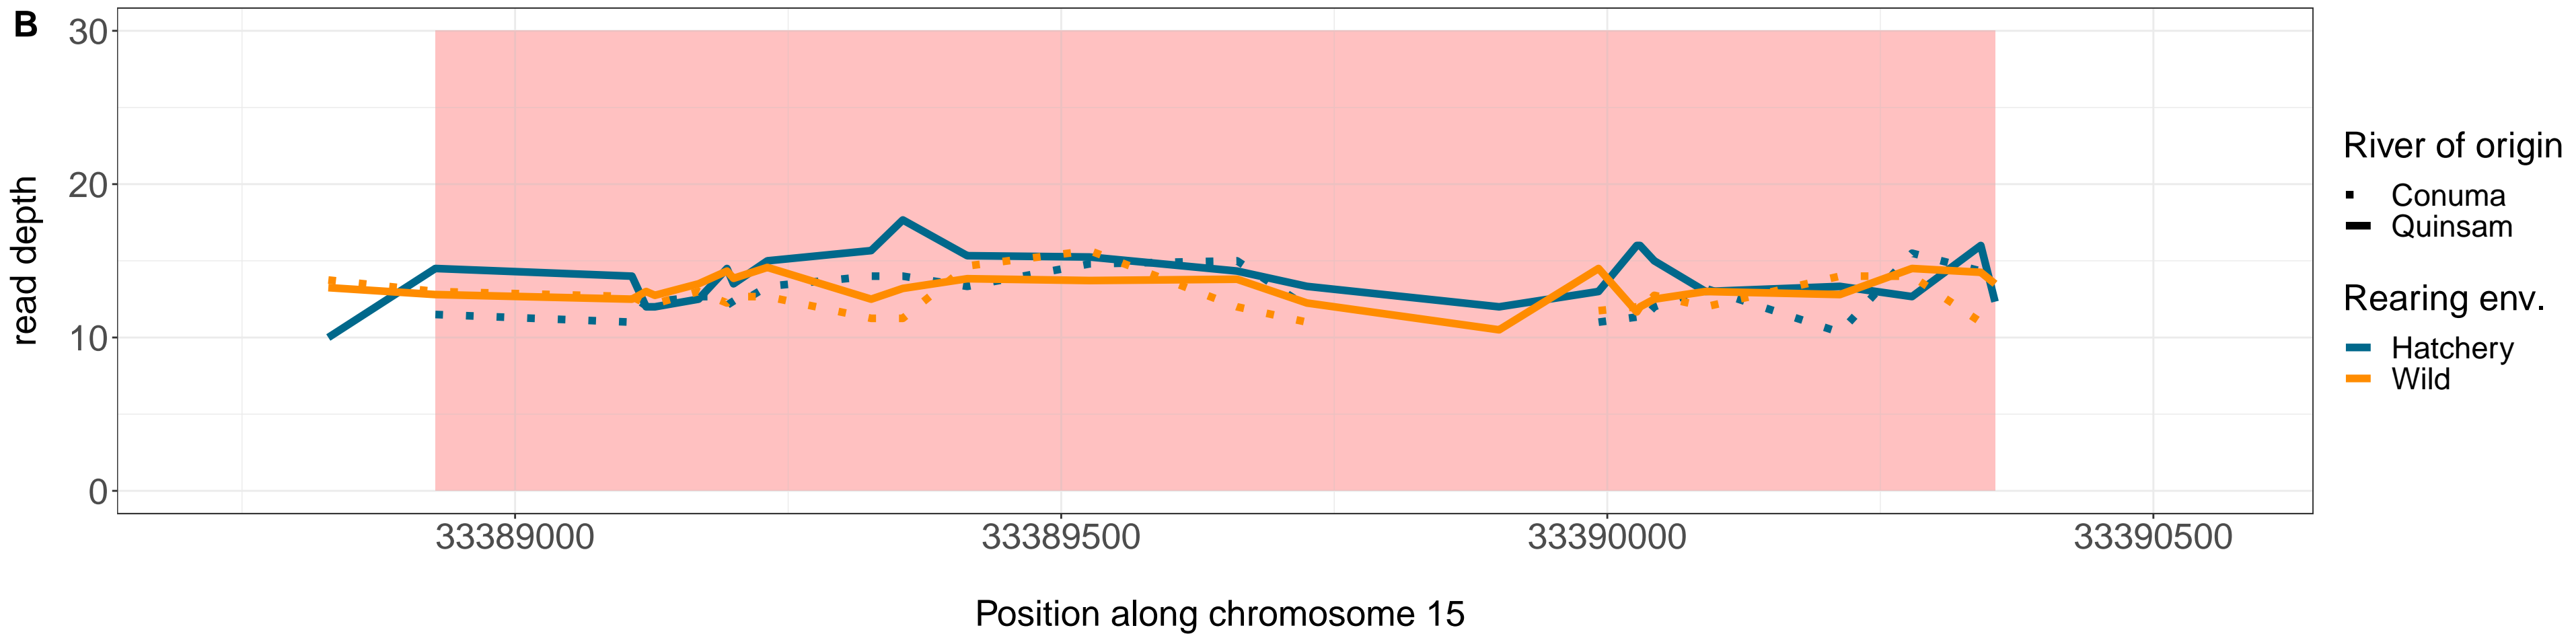

# DMR\_13

**A**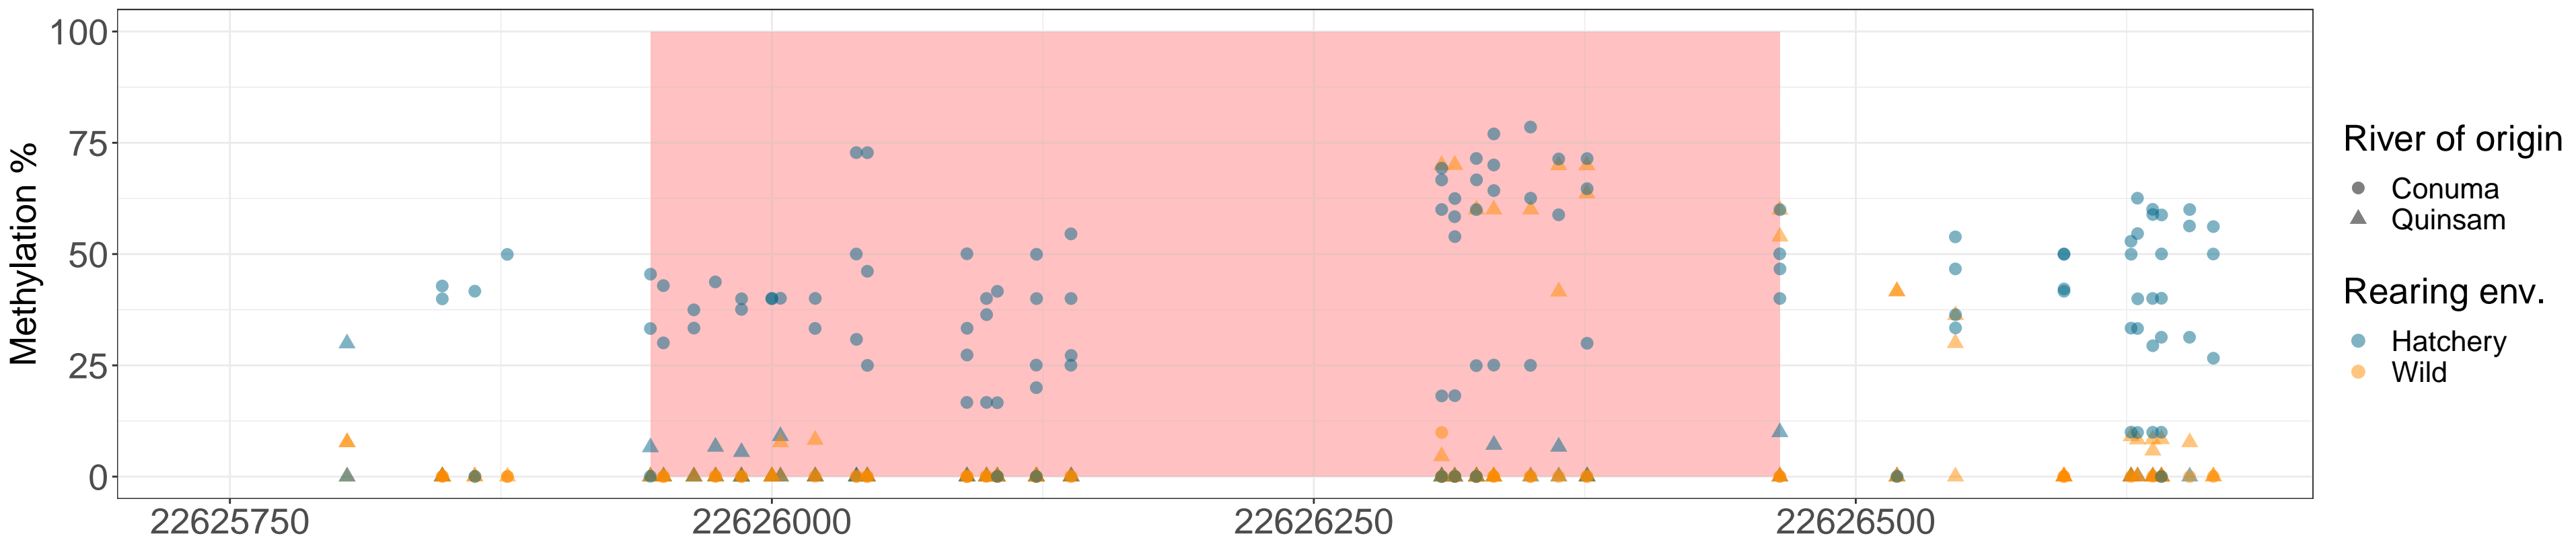**B**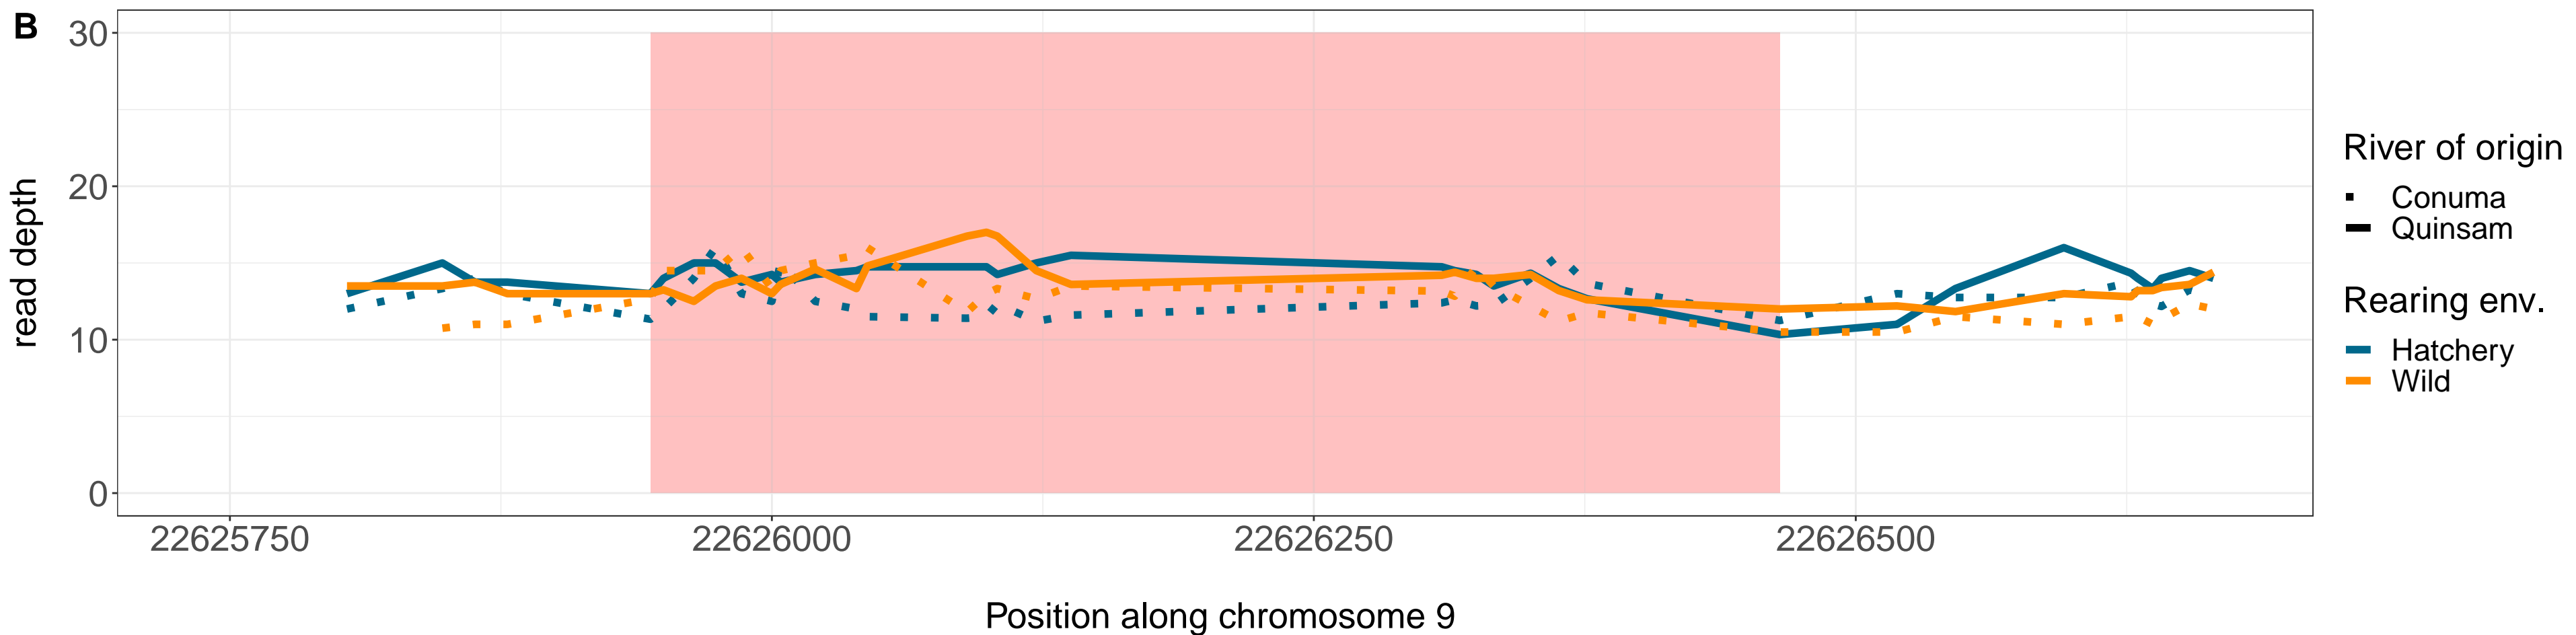

**A**

## DMR\_14

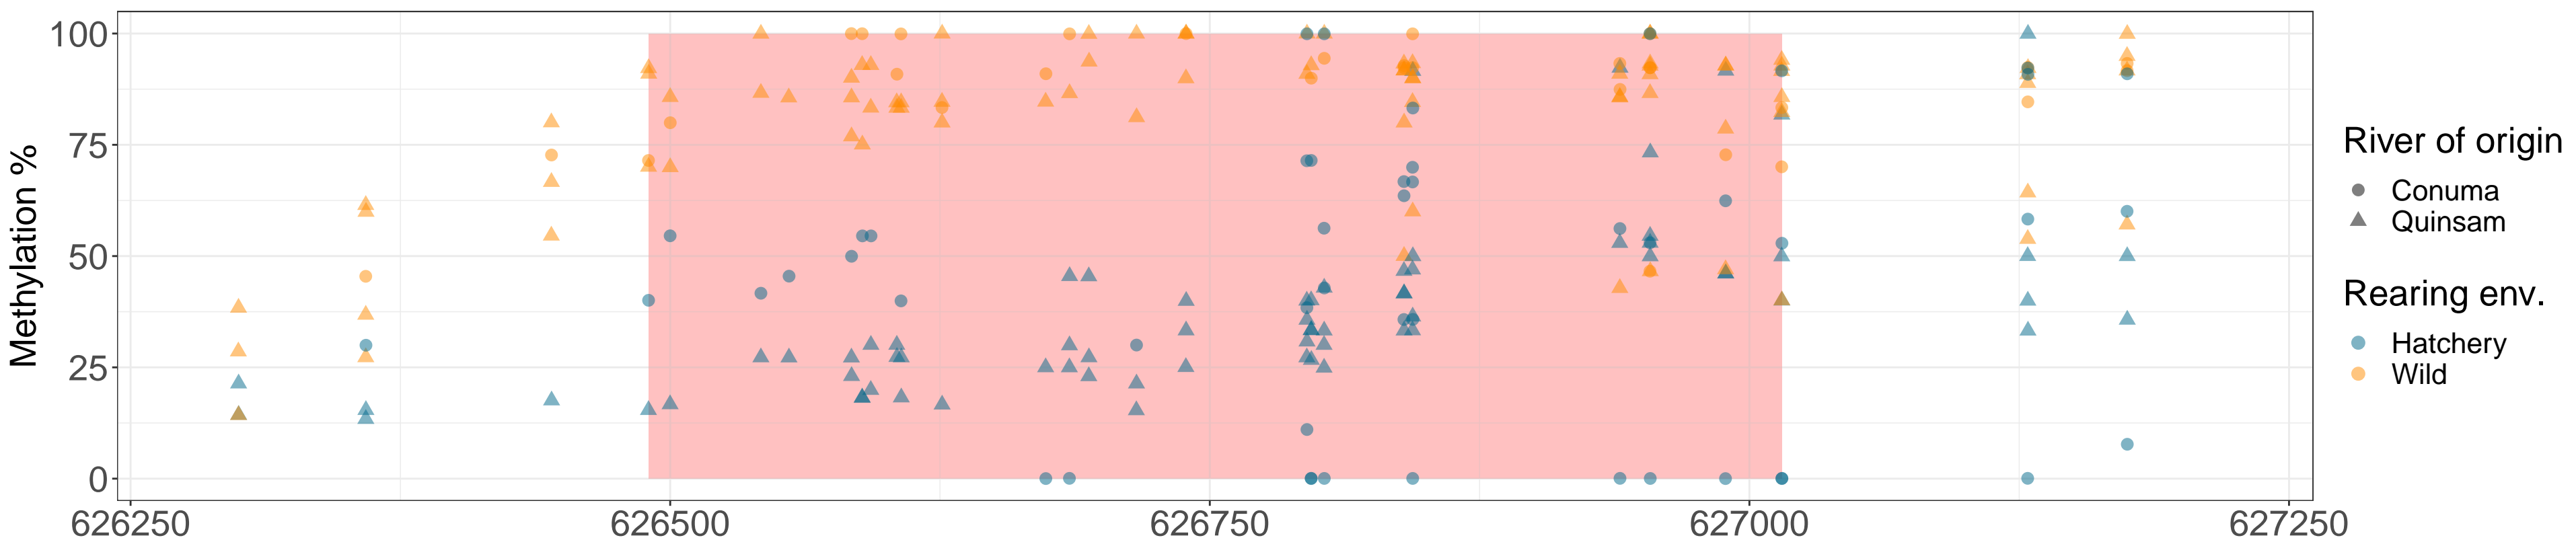**B**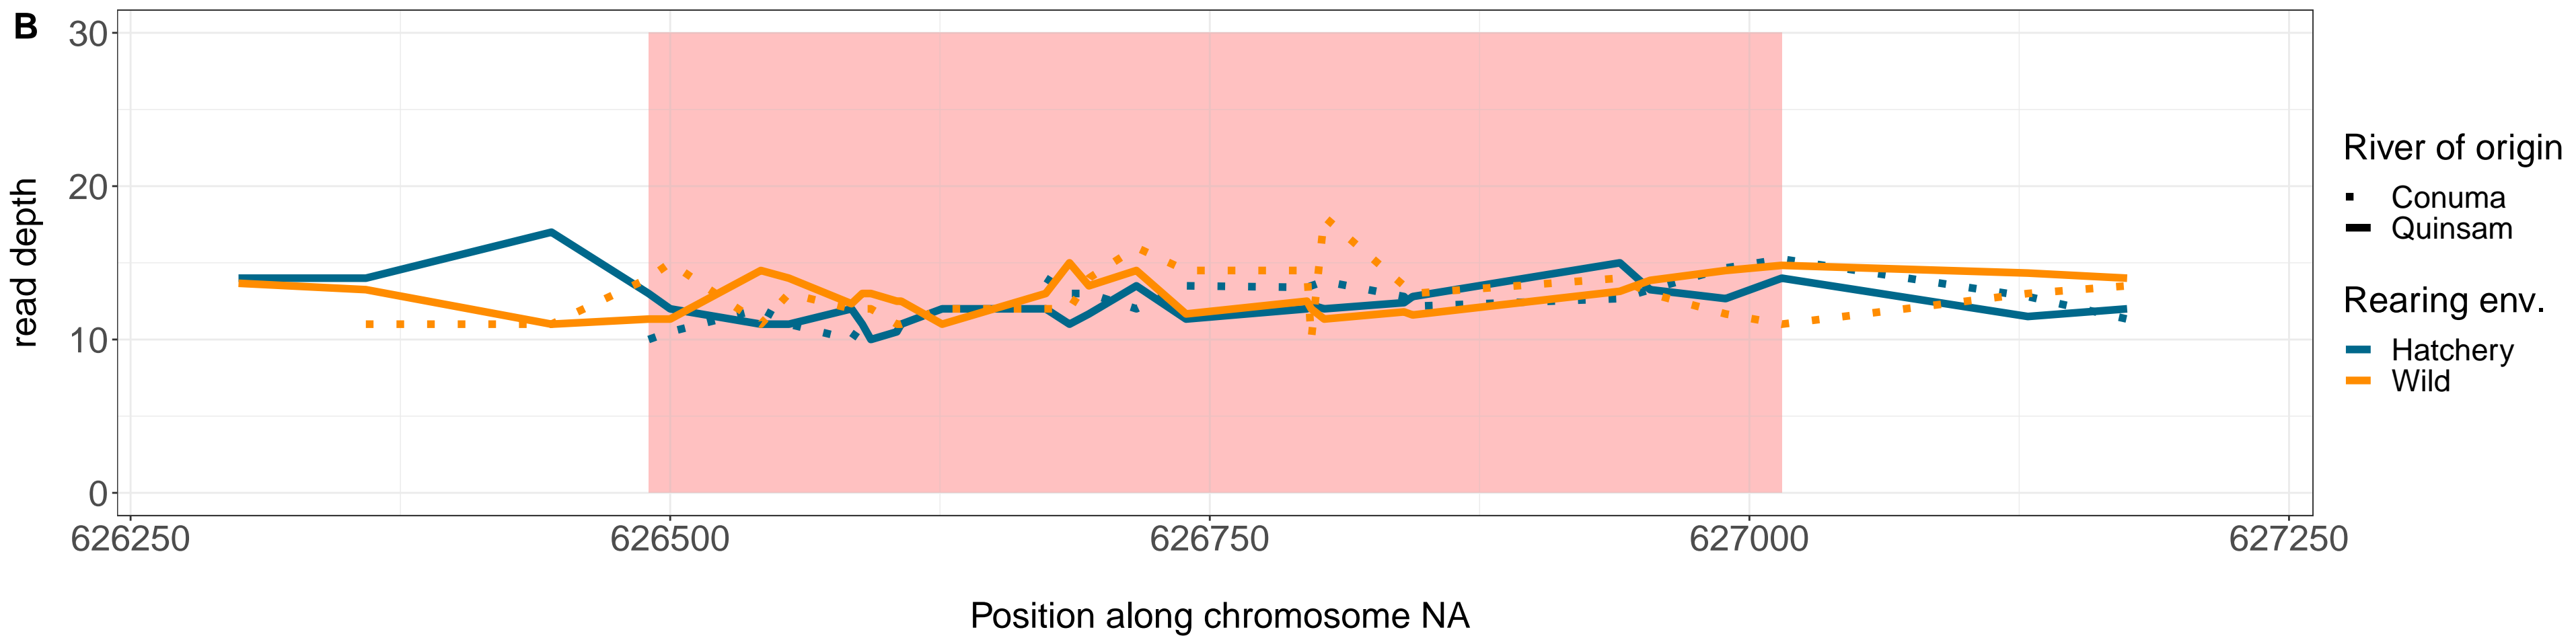

# DMR\_15

XM\_020502492.1

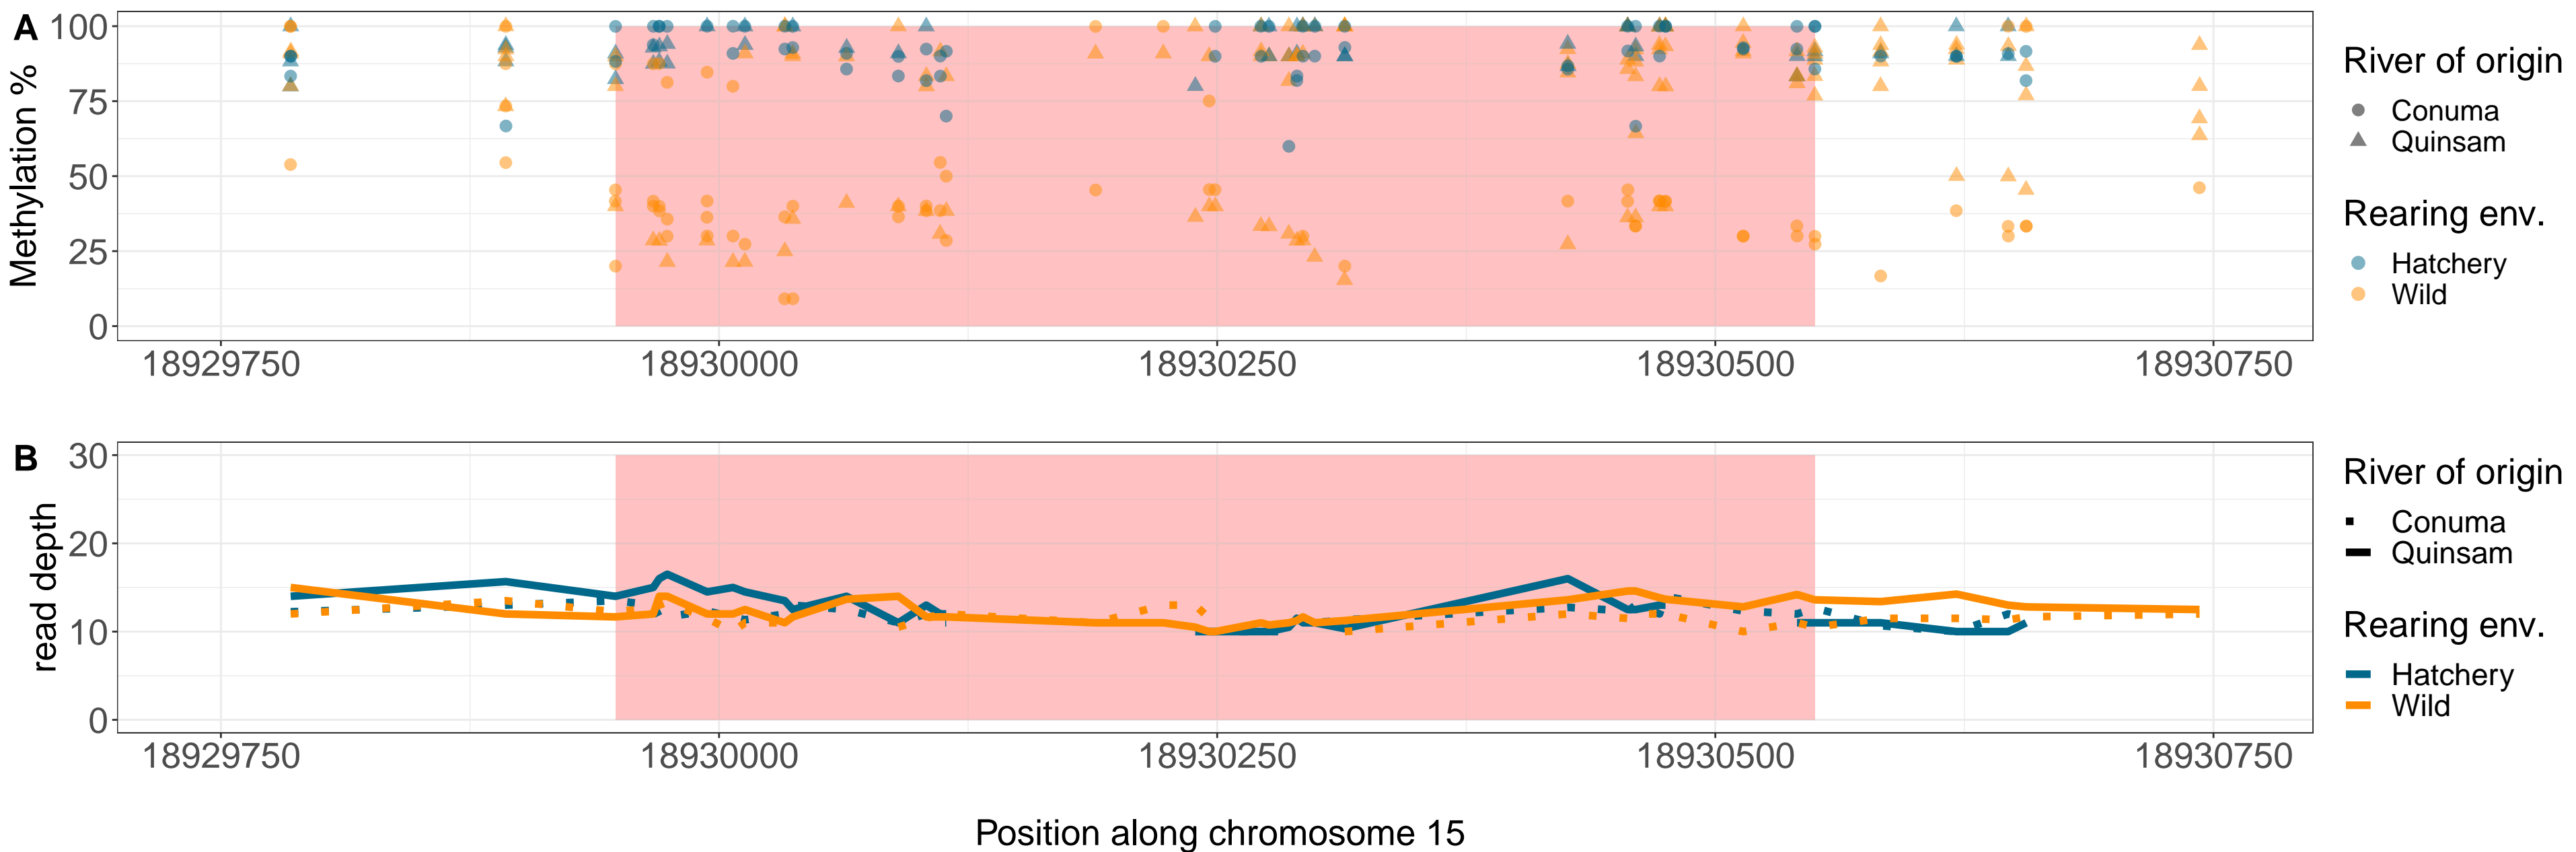

# DMR\_16

XM\_020503200.1

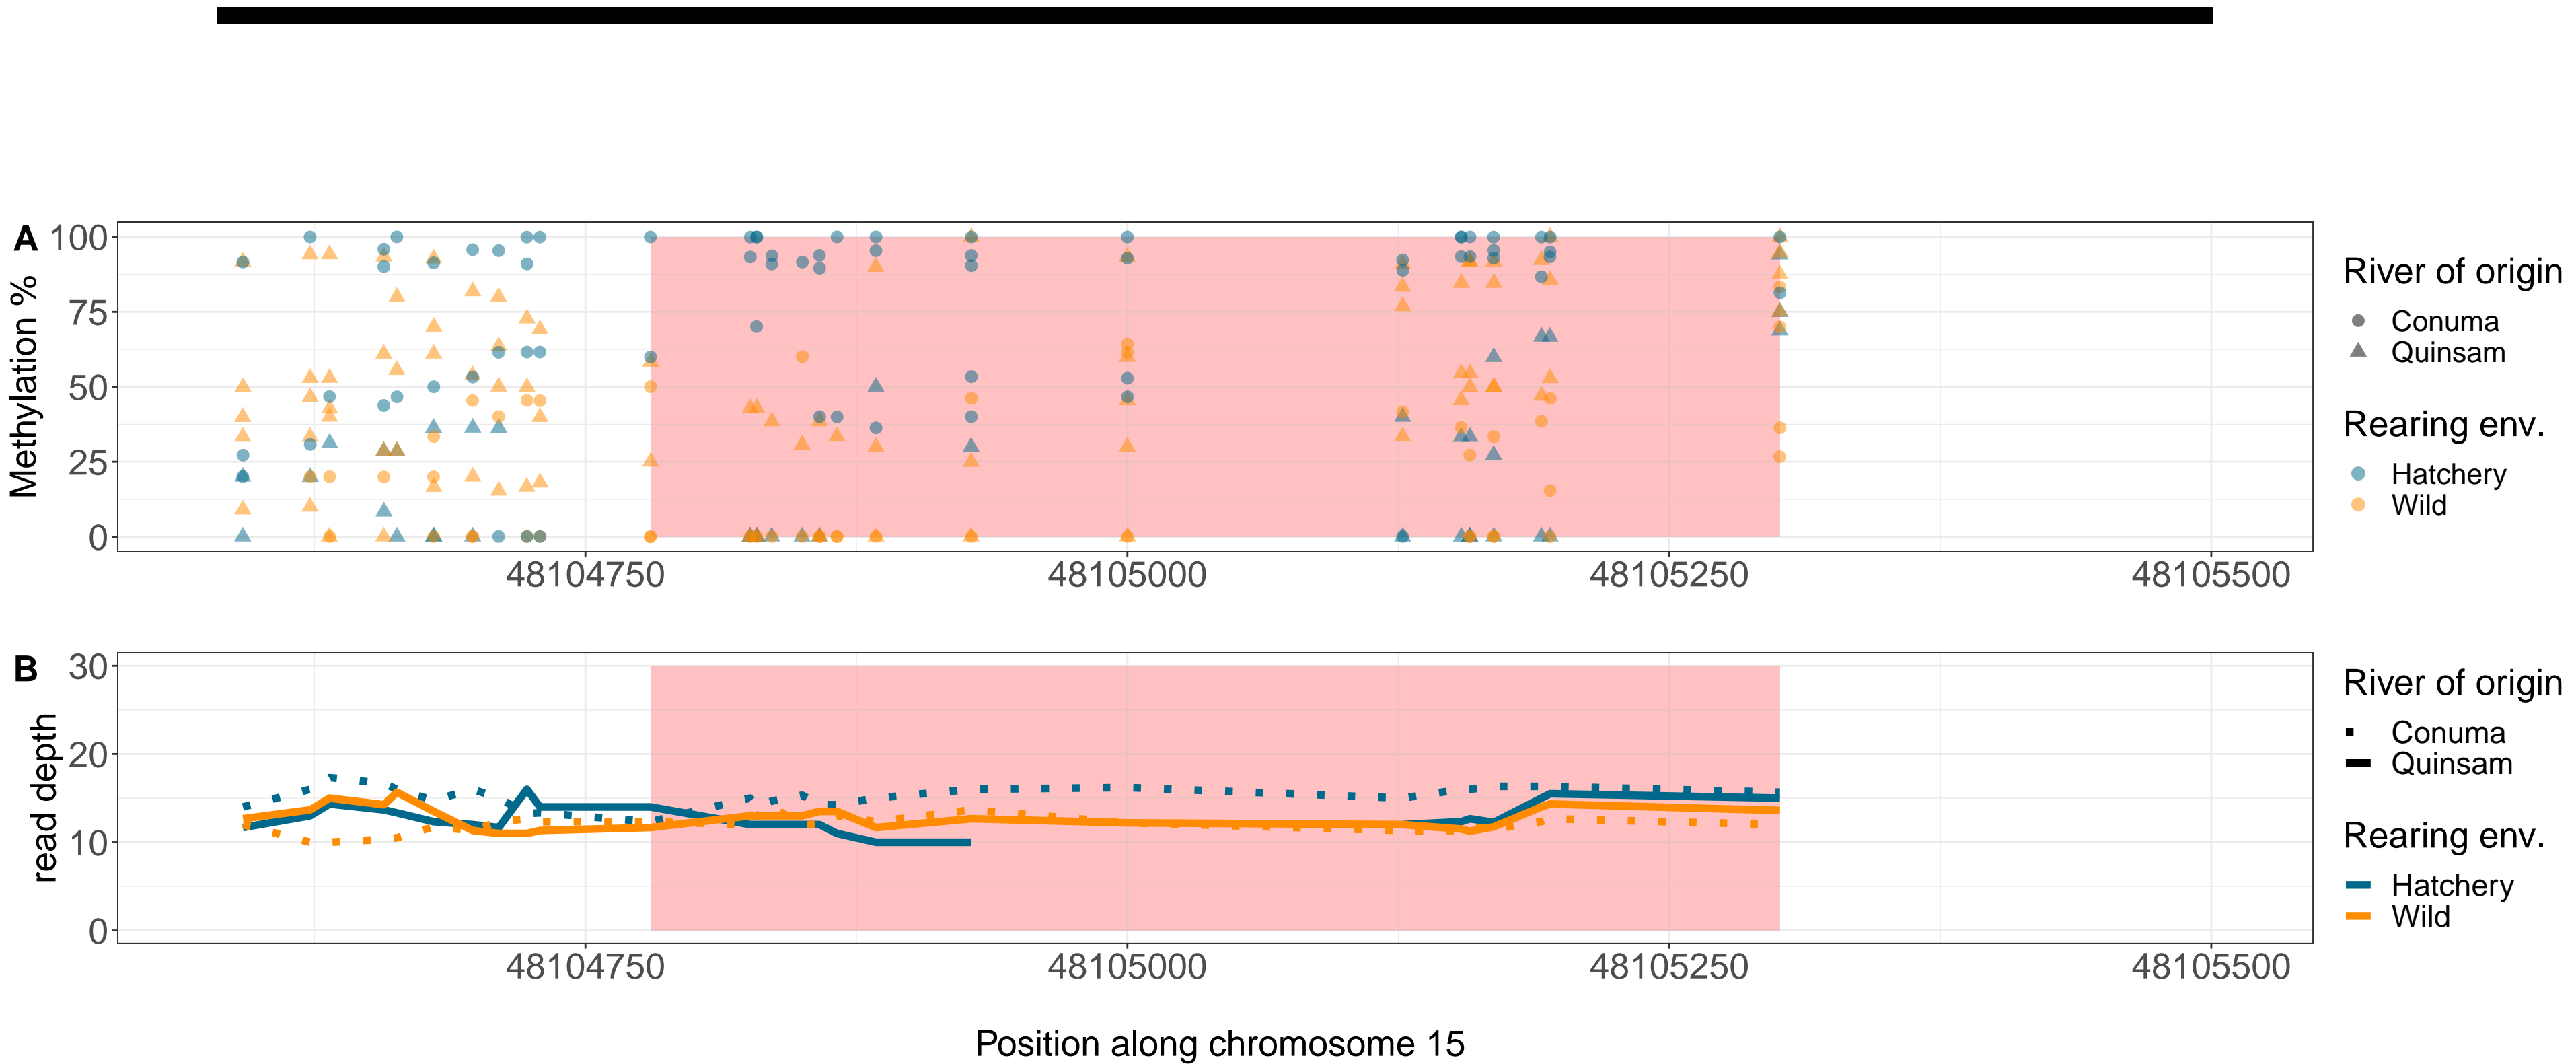



**A**

## DMR\_17

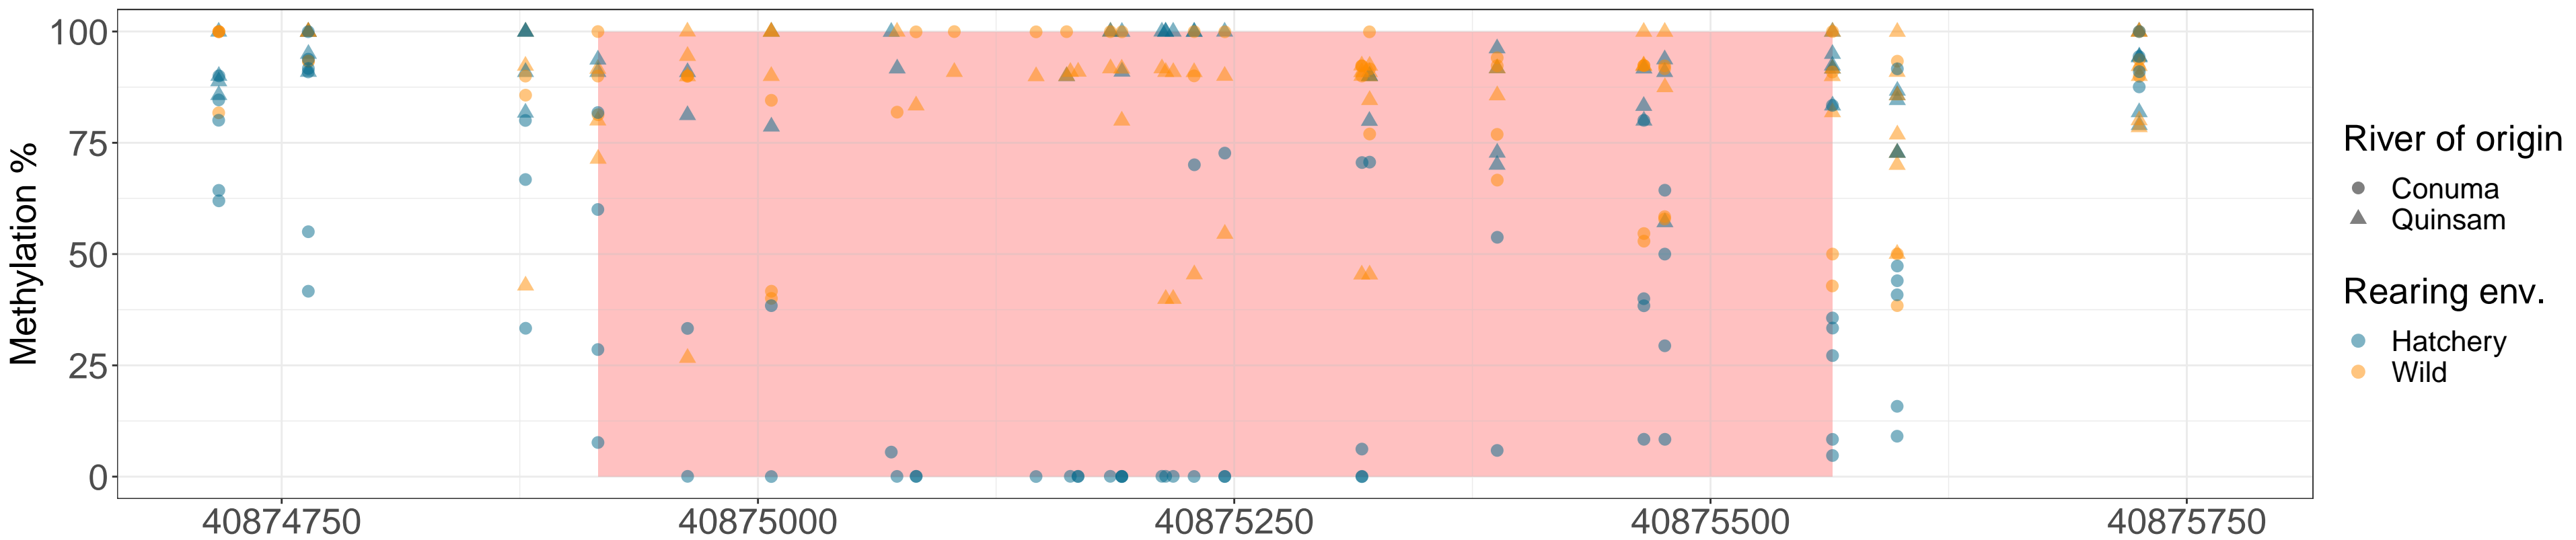**B**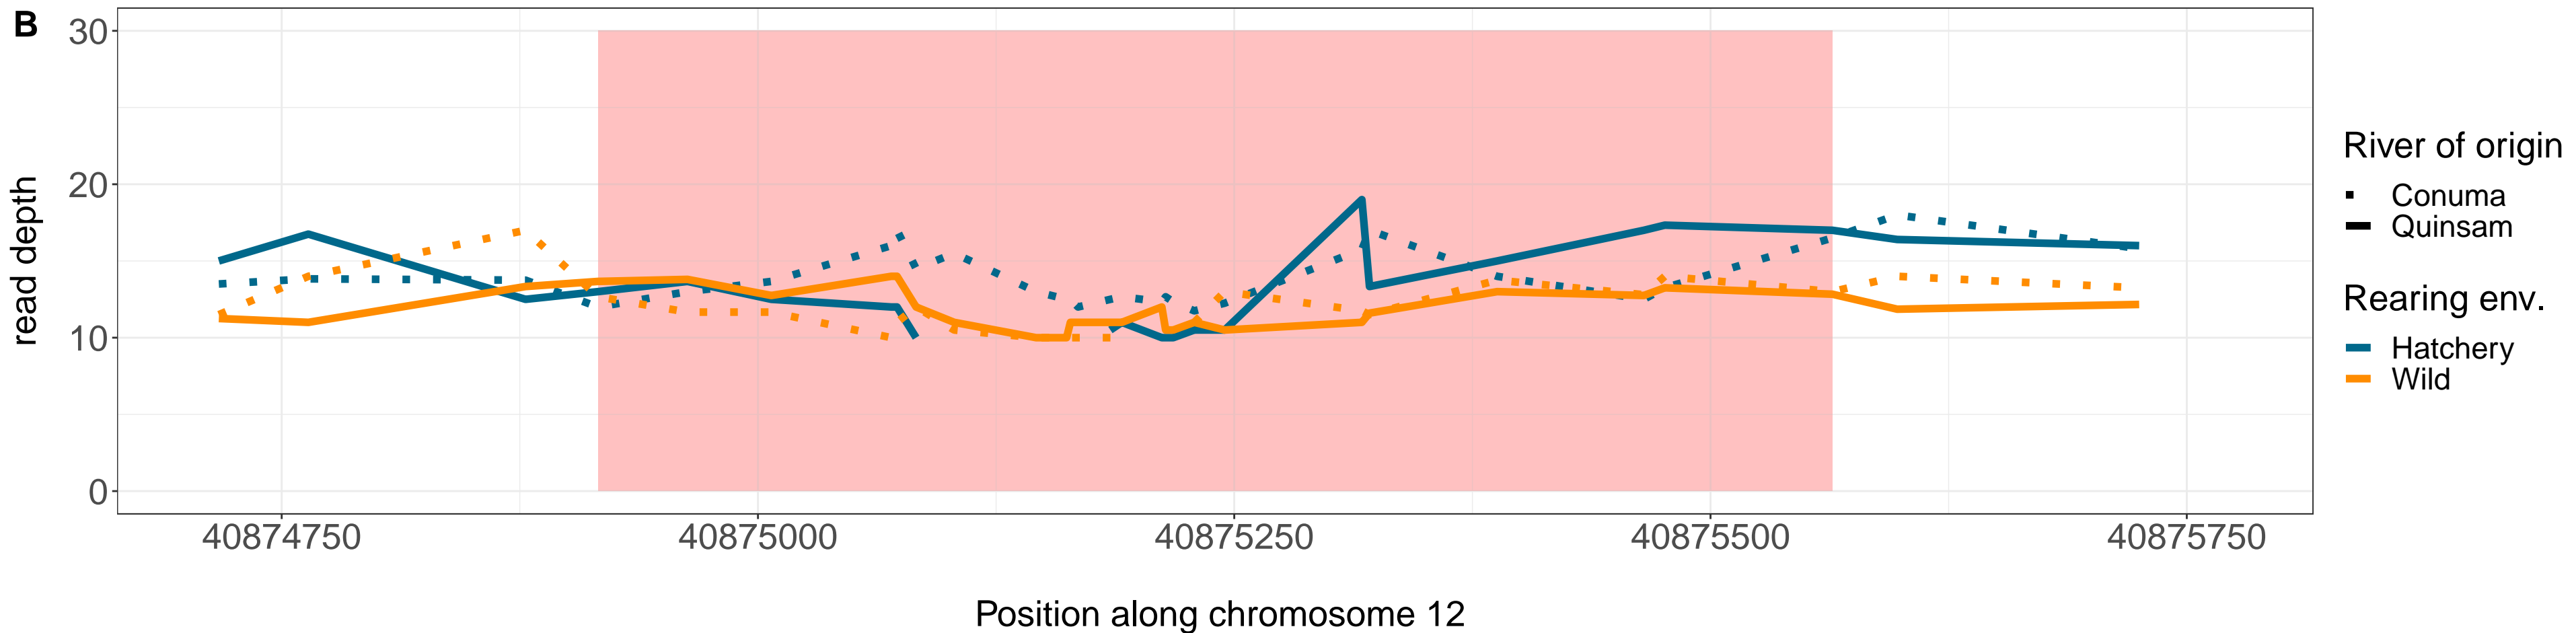

# DMR\_18

XM\_020507116.1

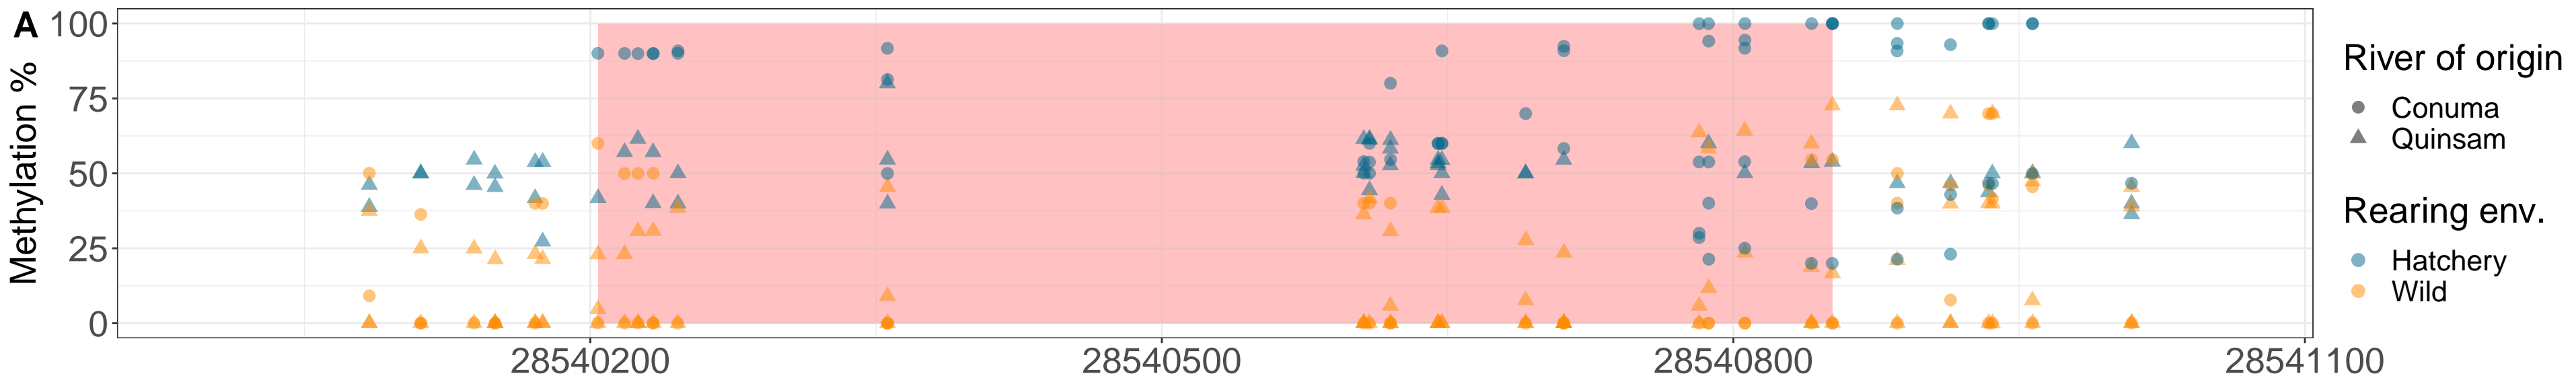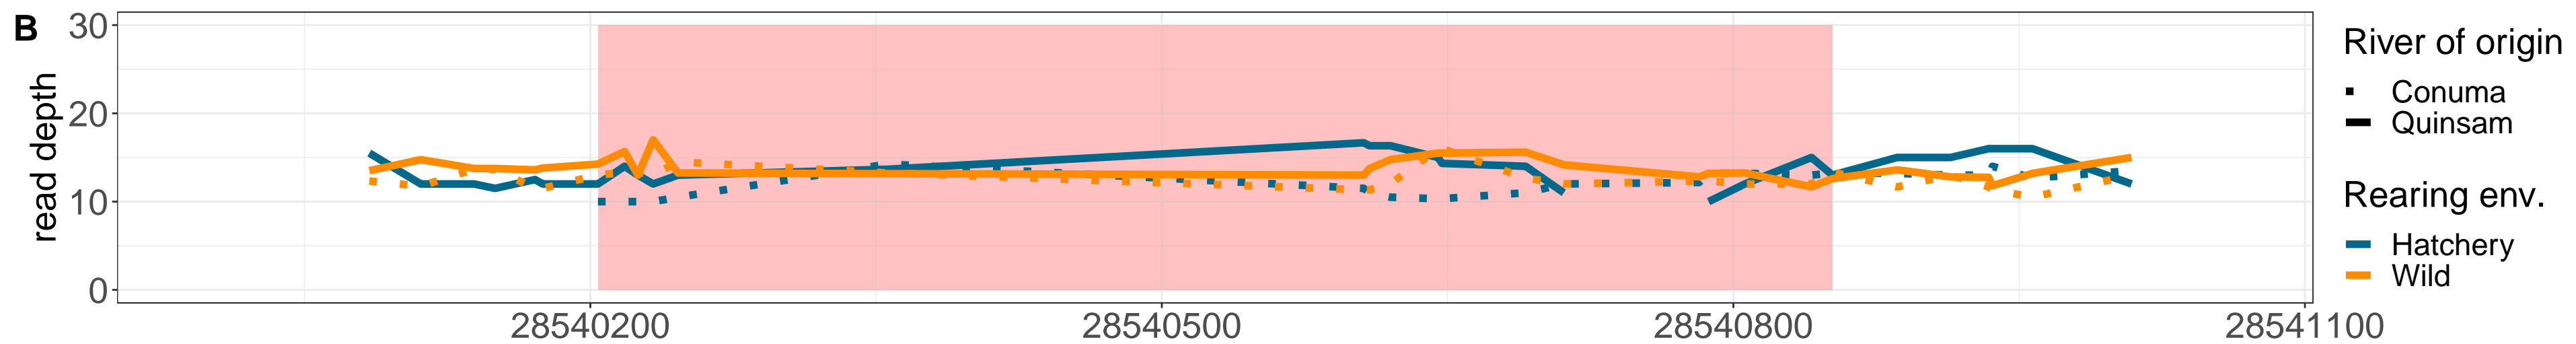

Position along chromosome 17

**A**

## DMR\_19

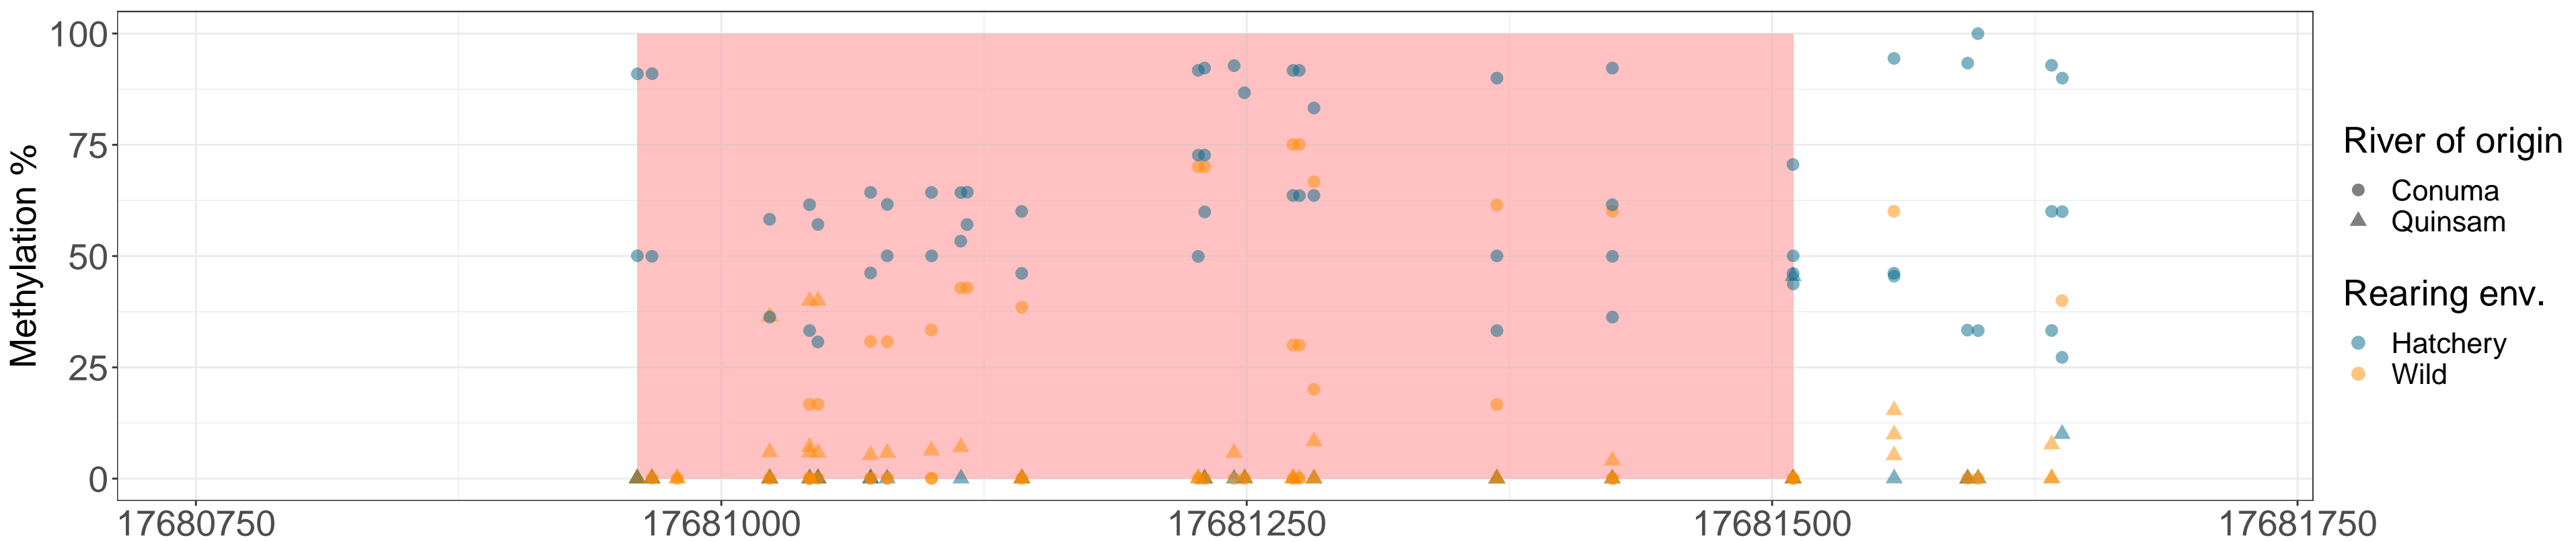**B**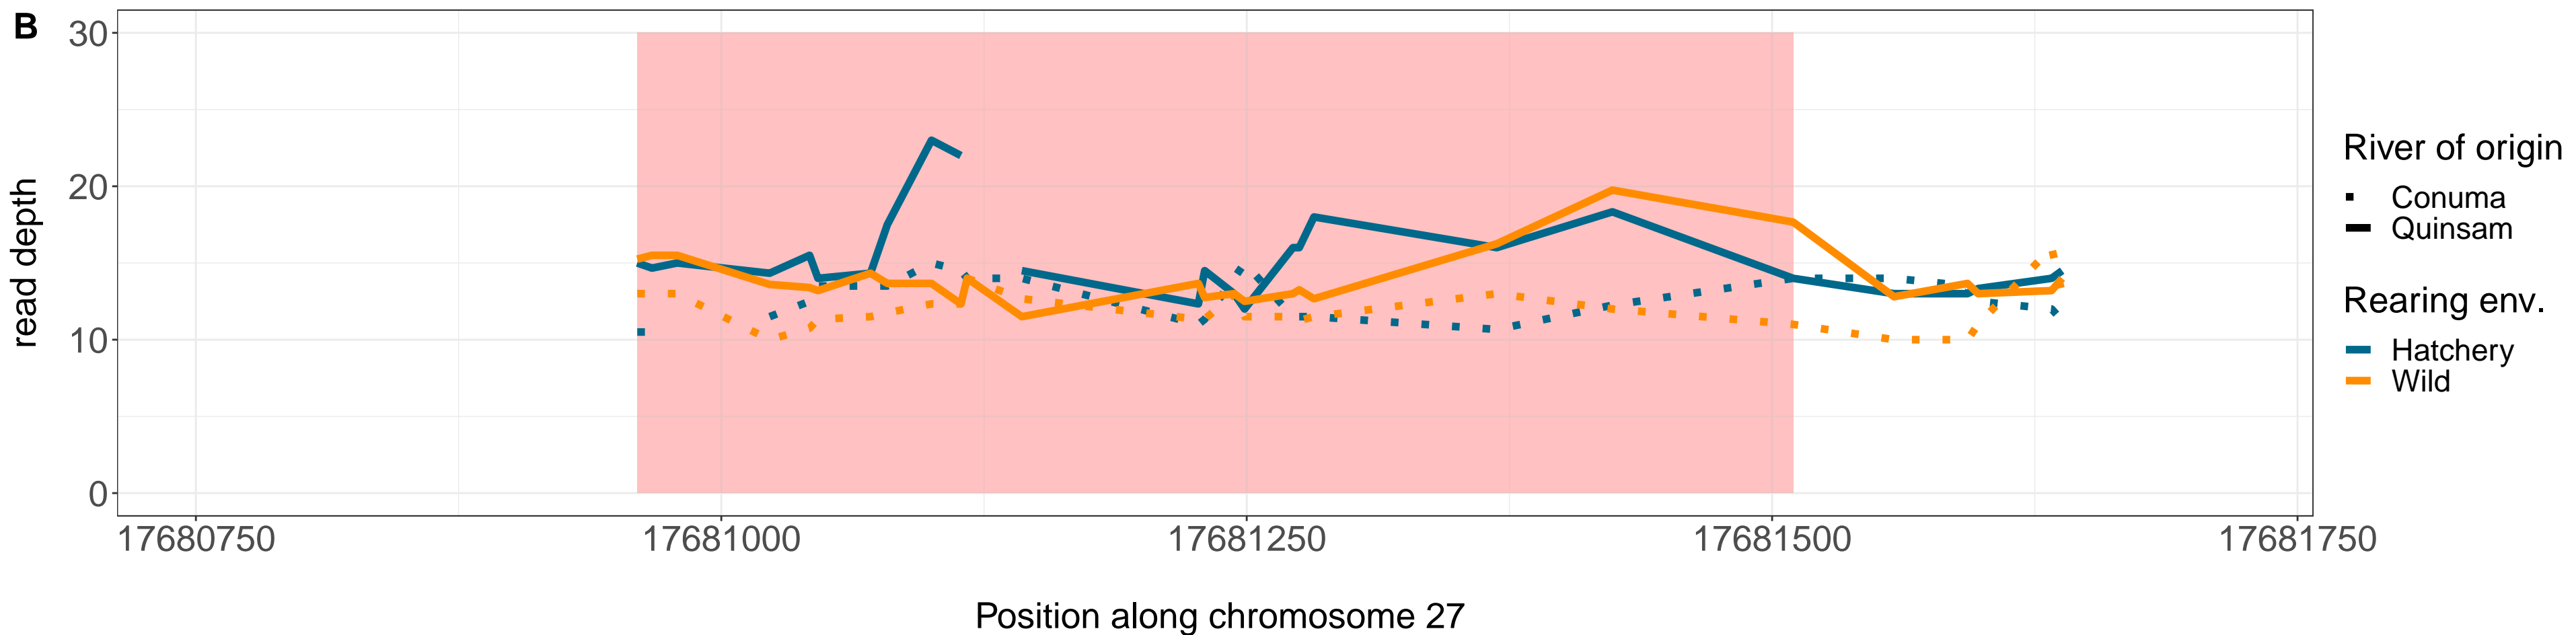

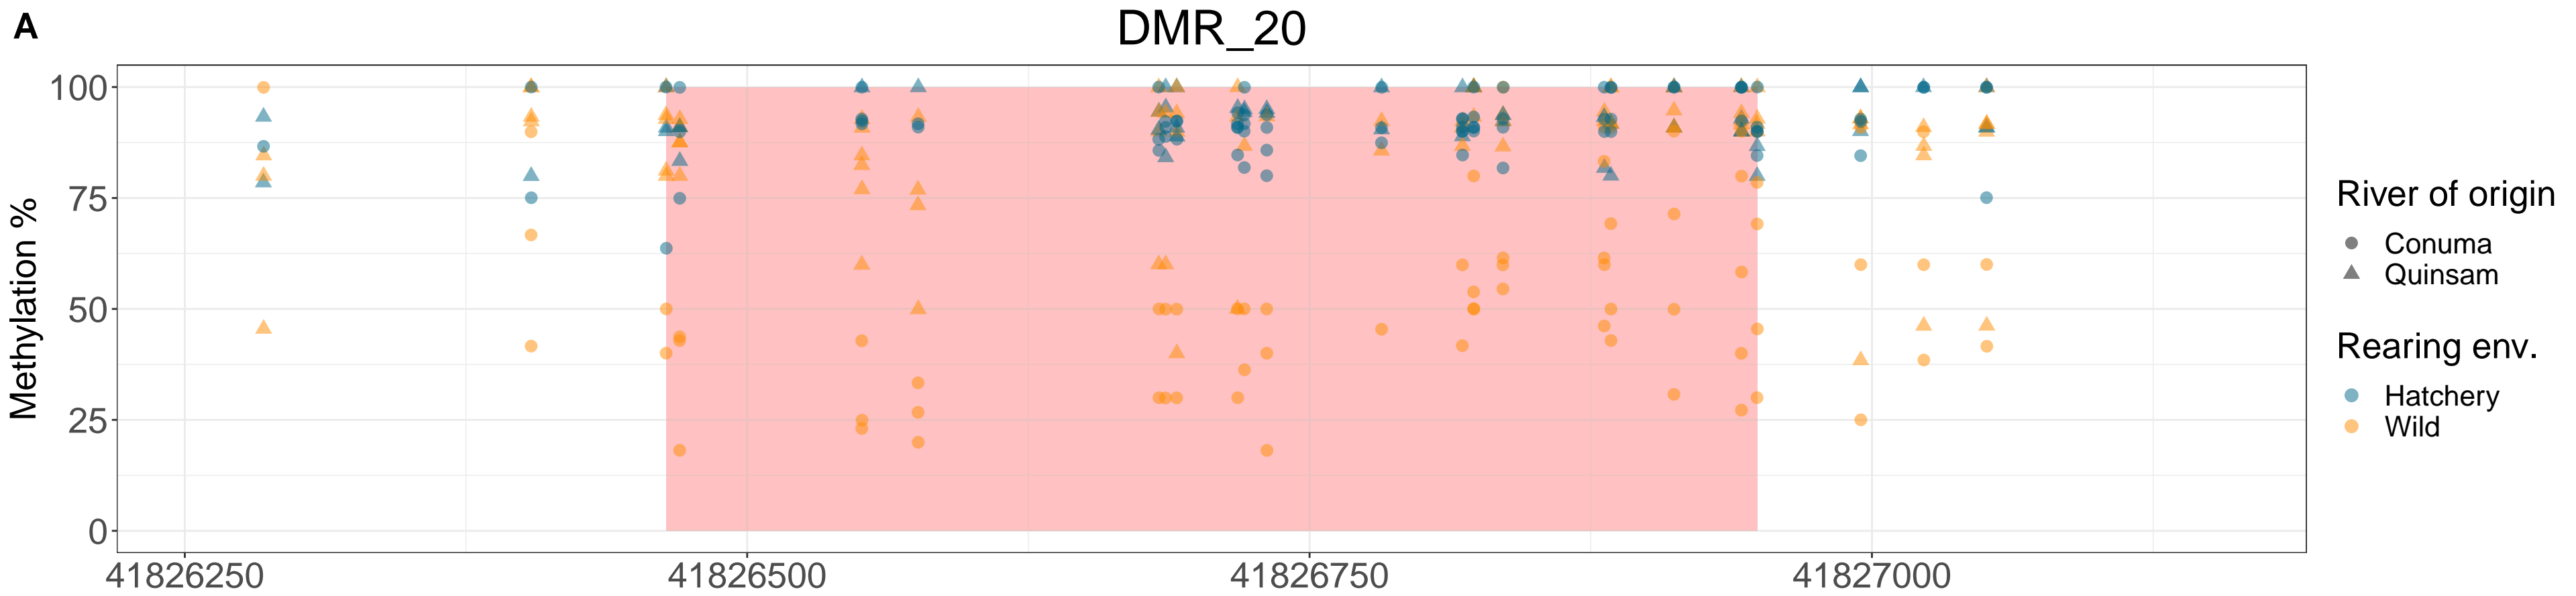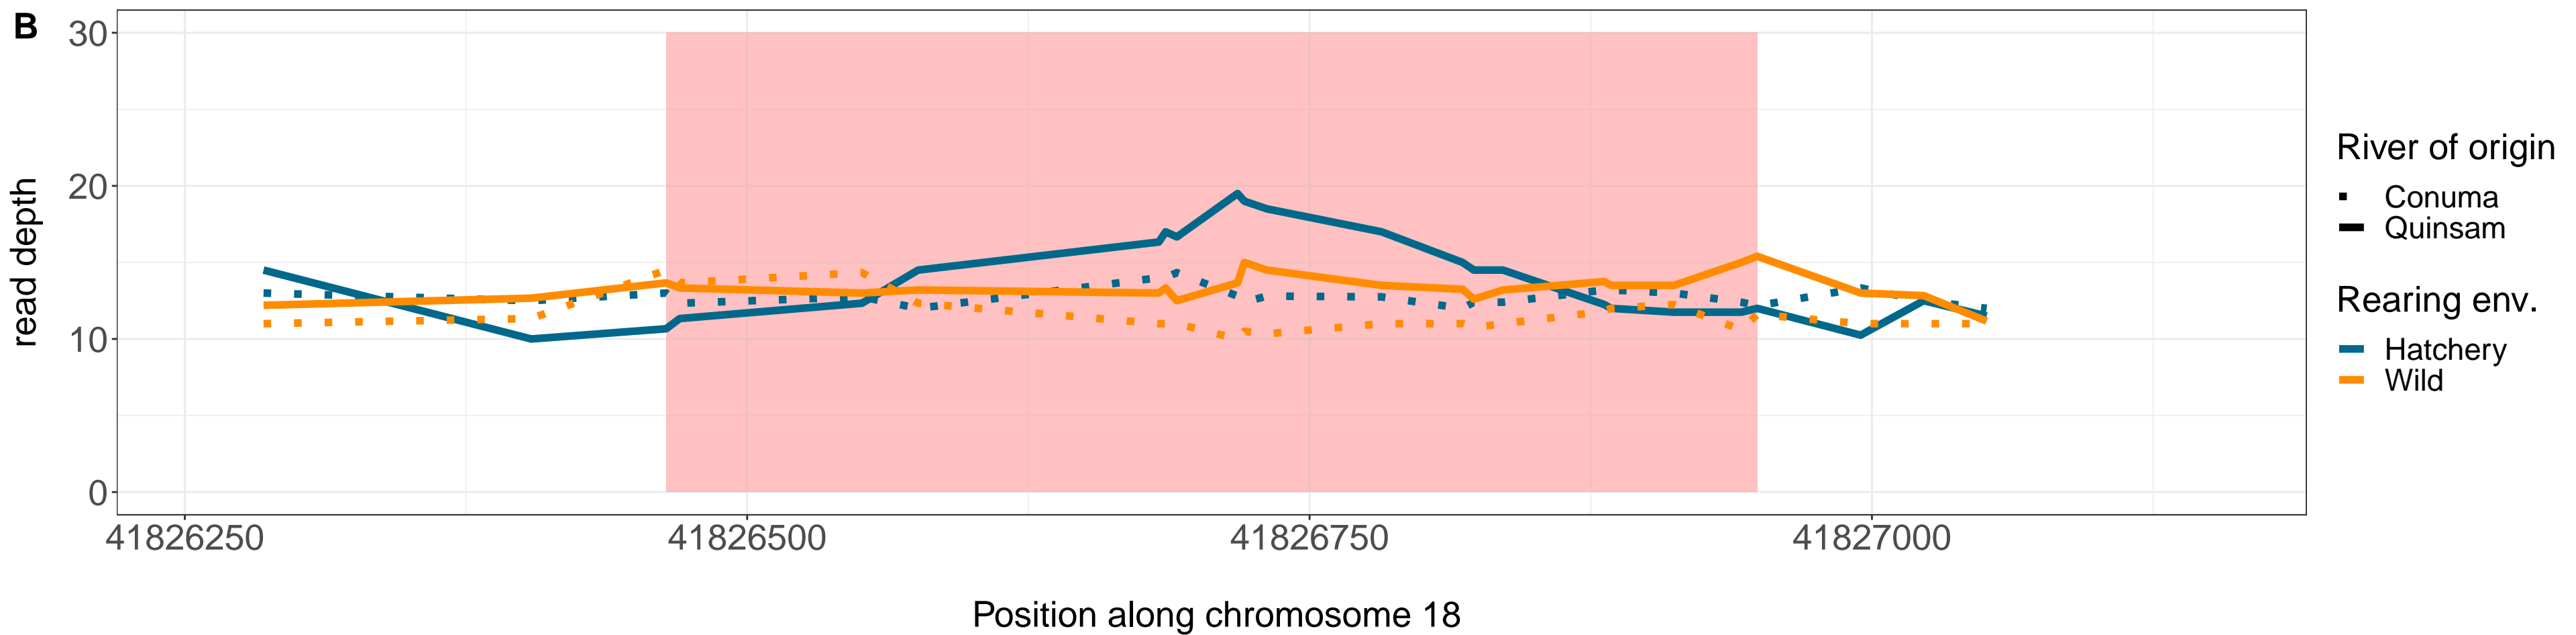

# DMR\_21

XM\_020473289.1

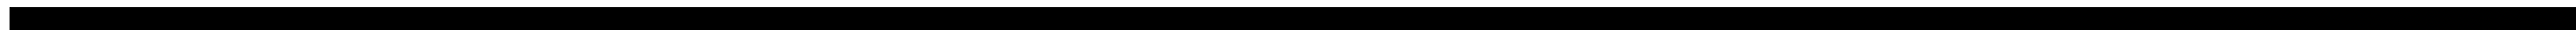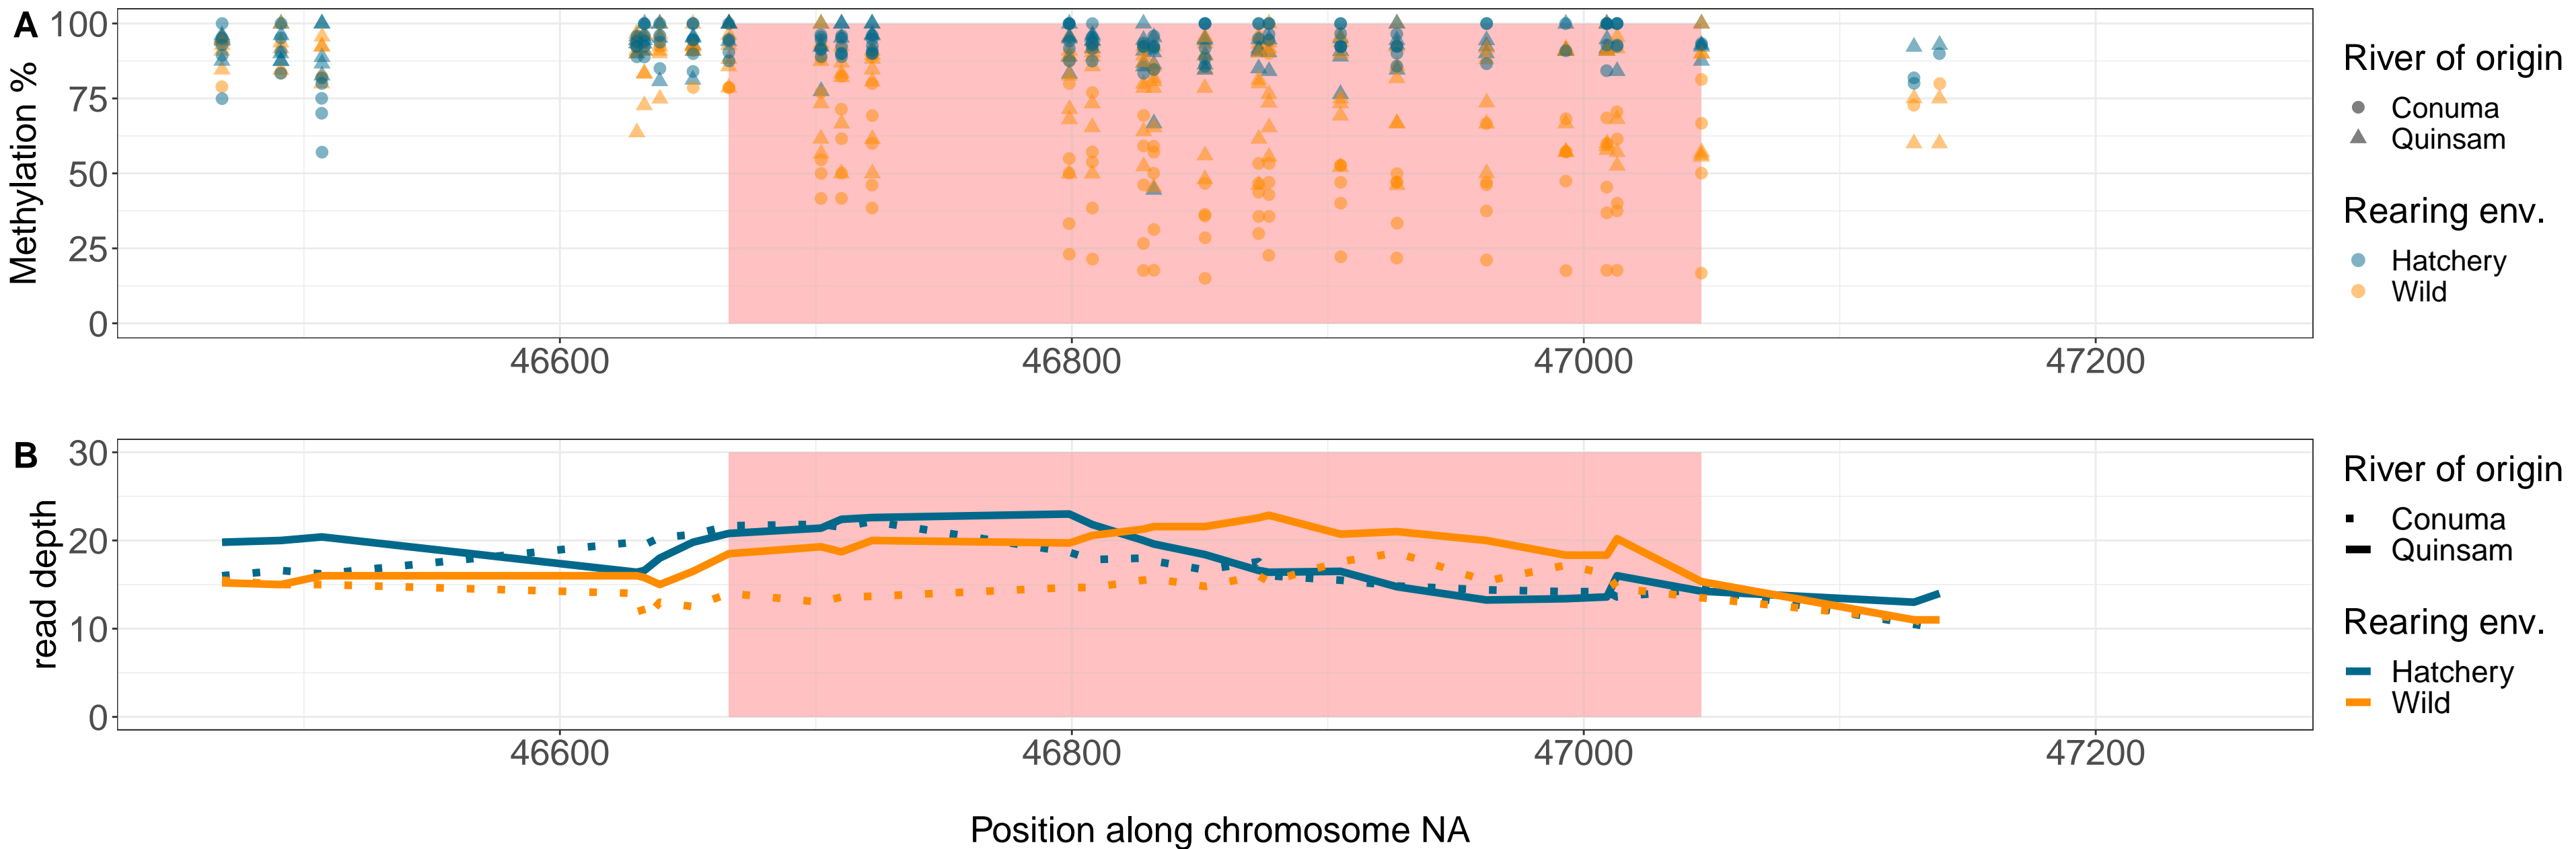

# DMR\_22

XM\_020453590.1

XM\_020453589.1

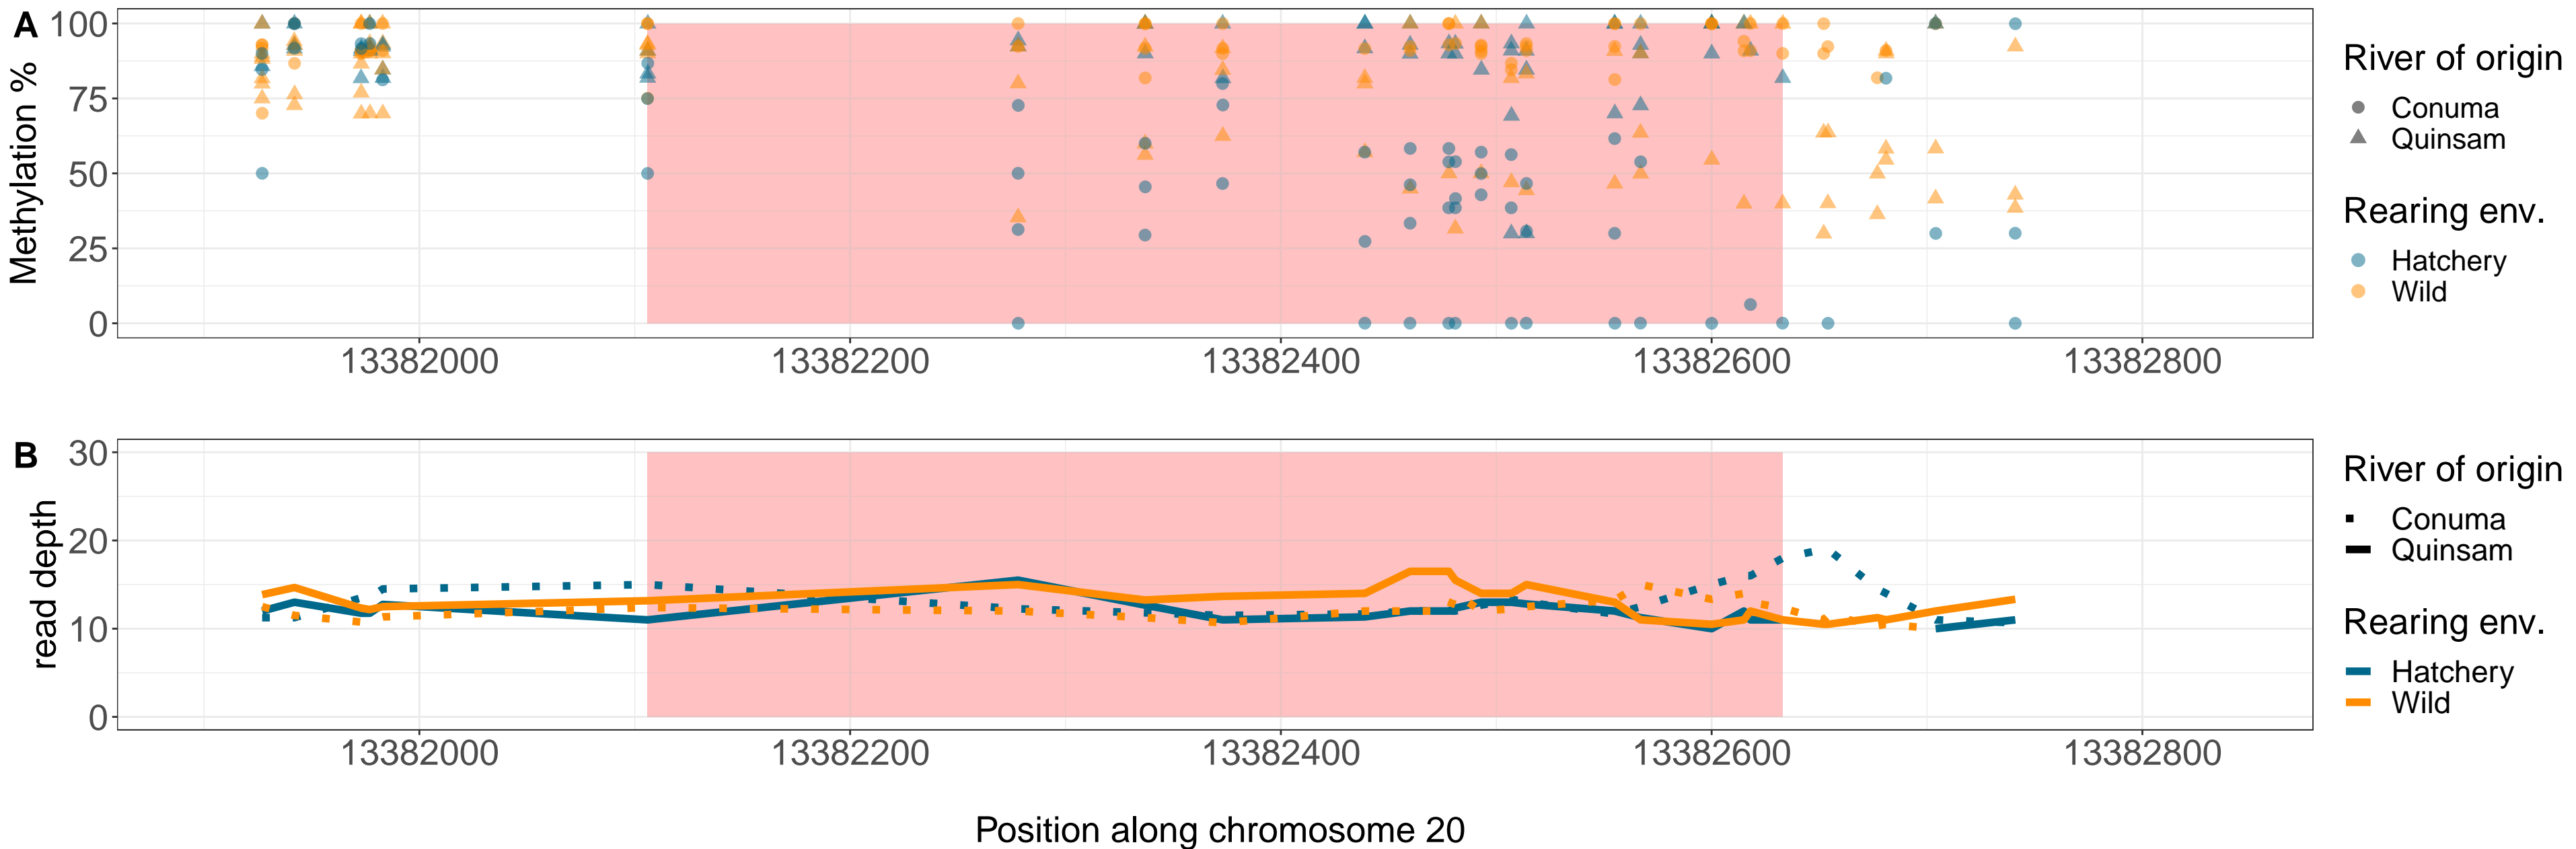

**A**

## DMR\_23

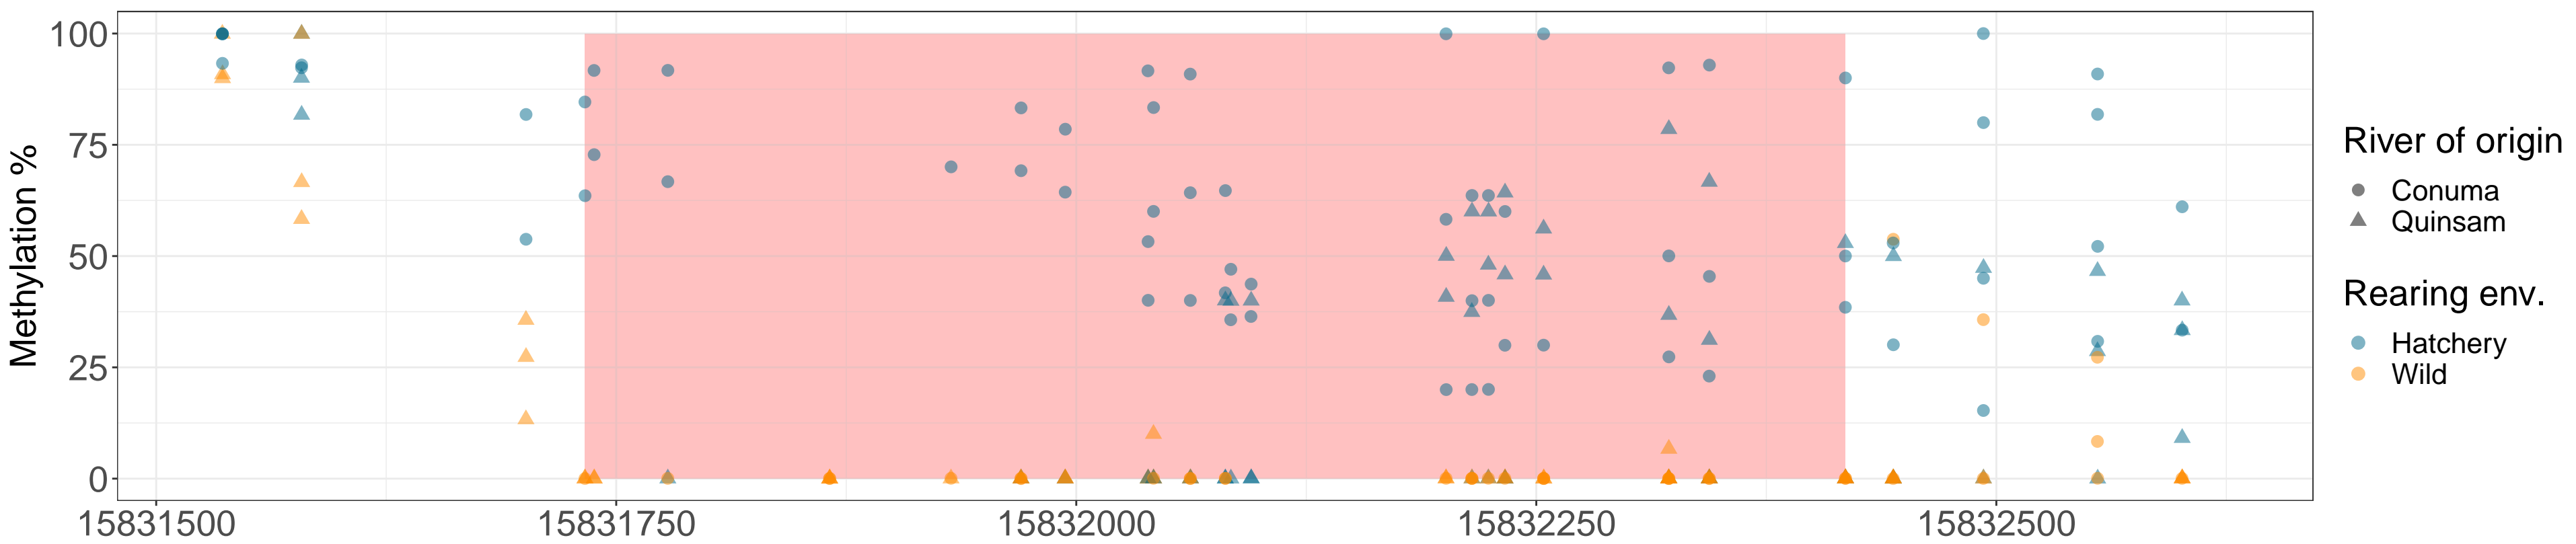**B**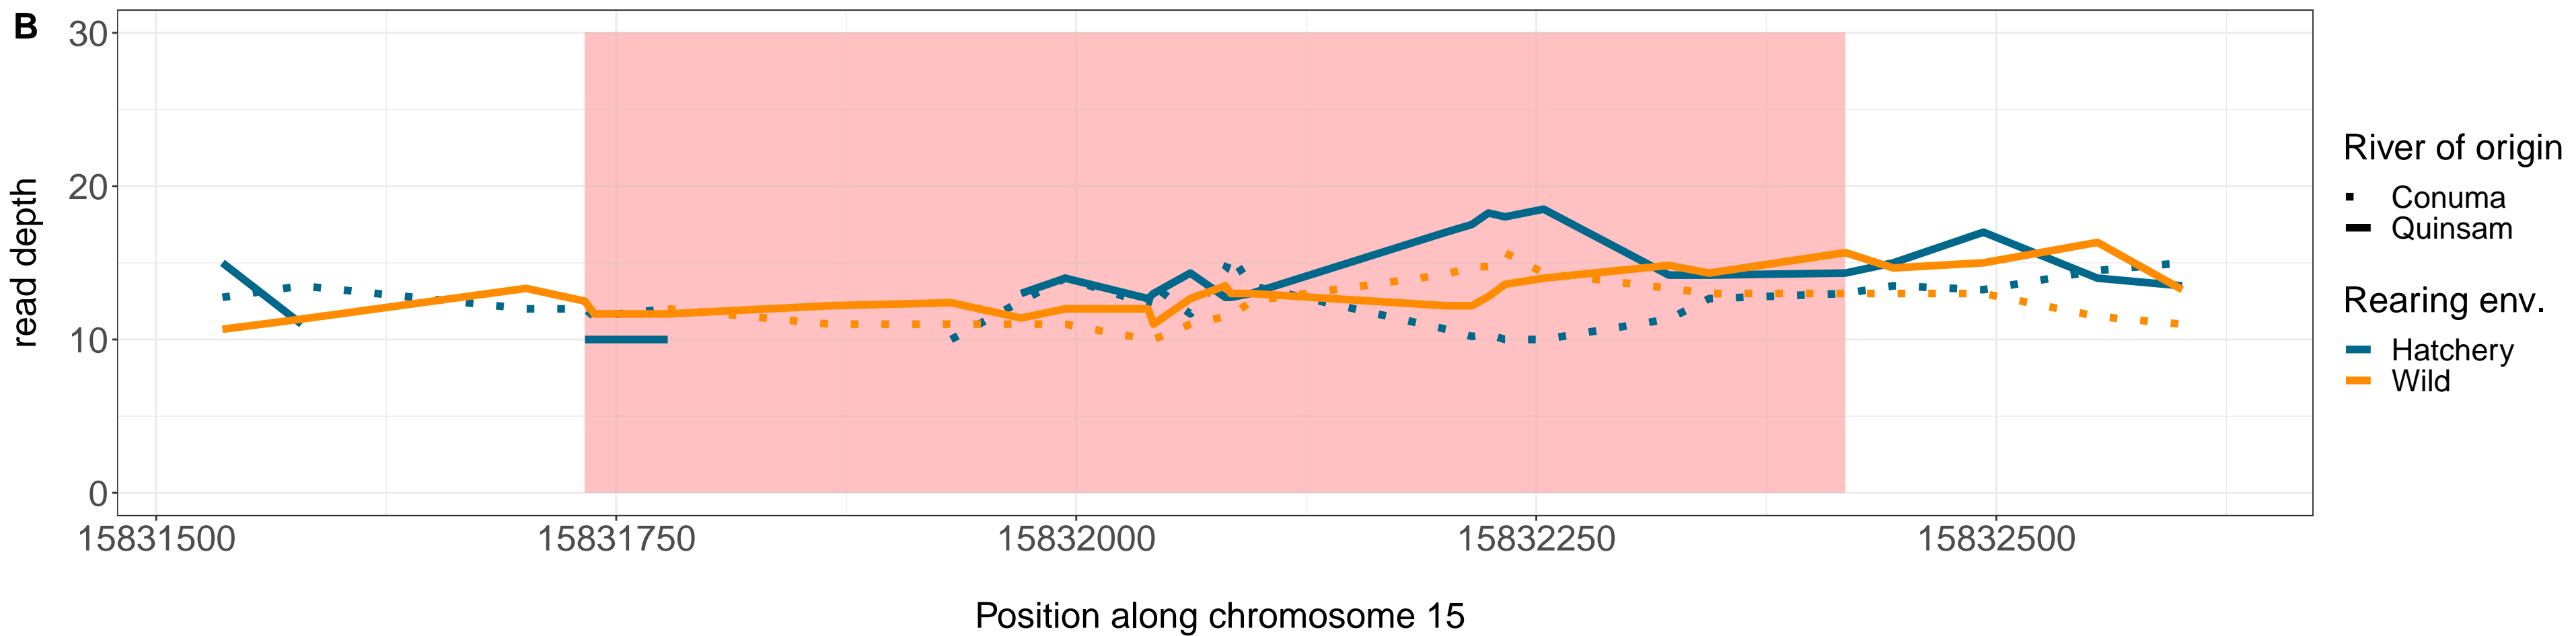

# DMR\_24

XM\_020454244.1

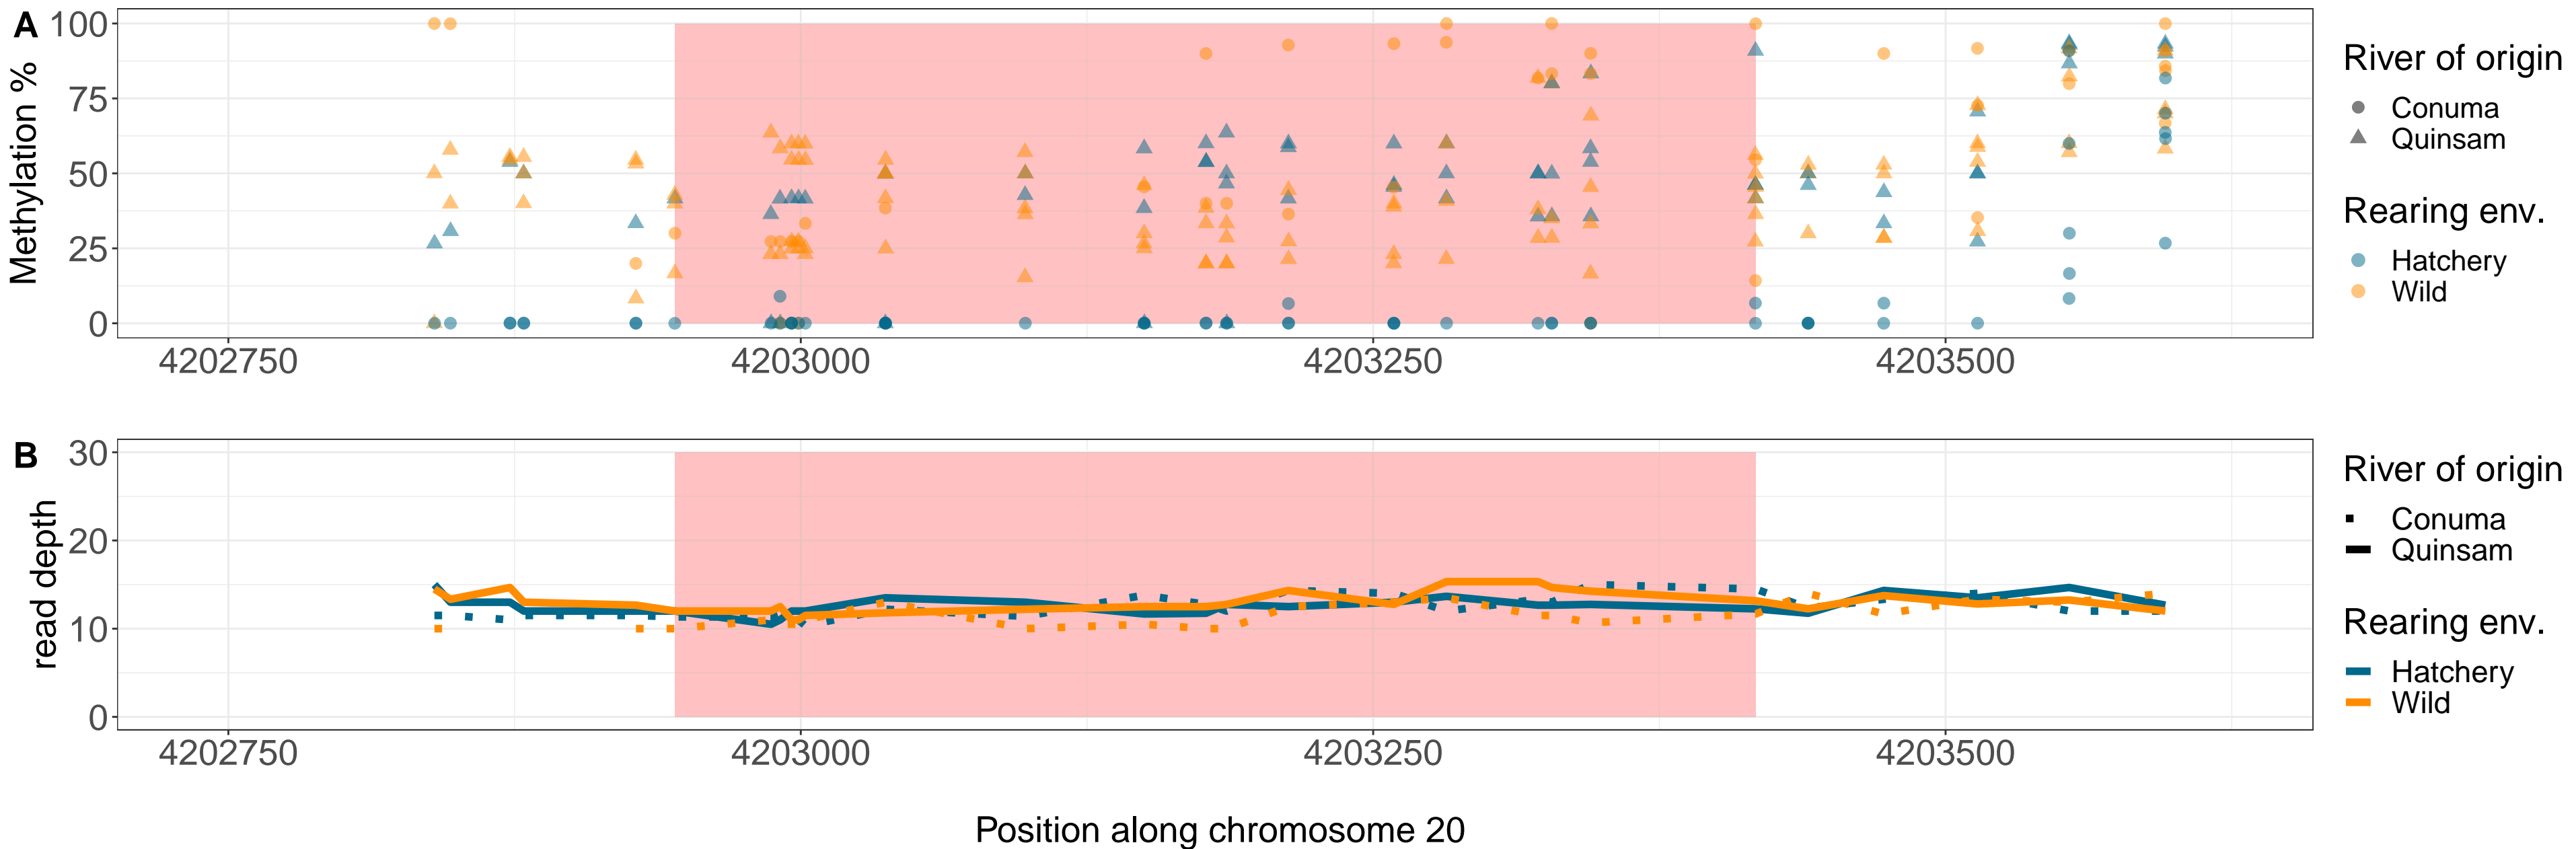



**A**

## DMR\_25

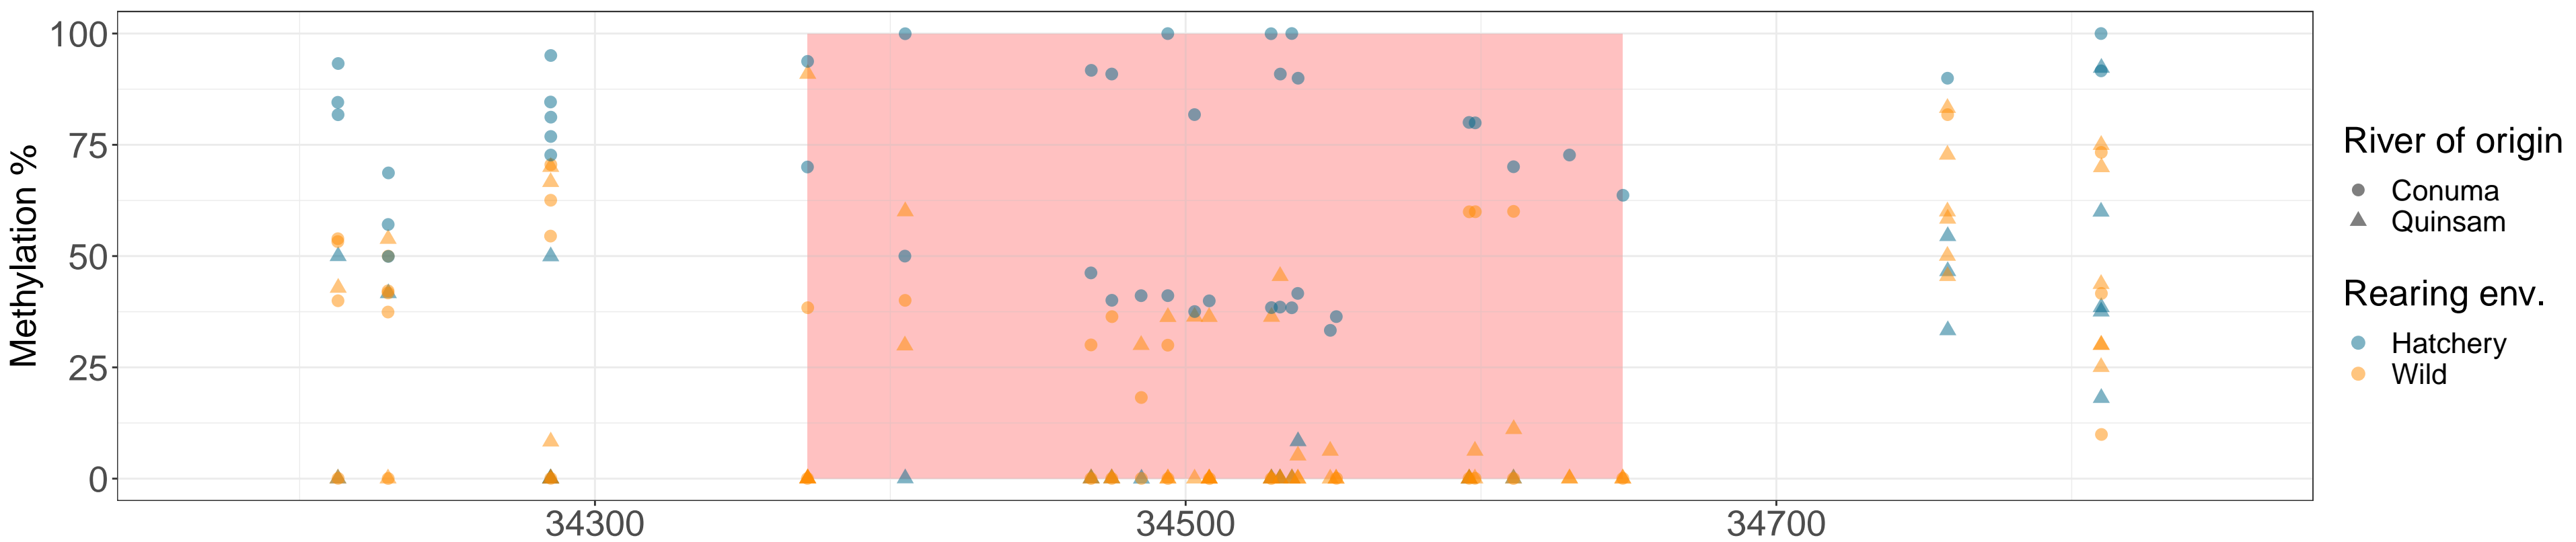**B**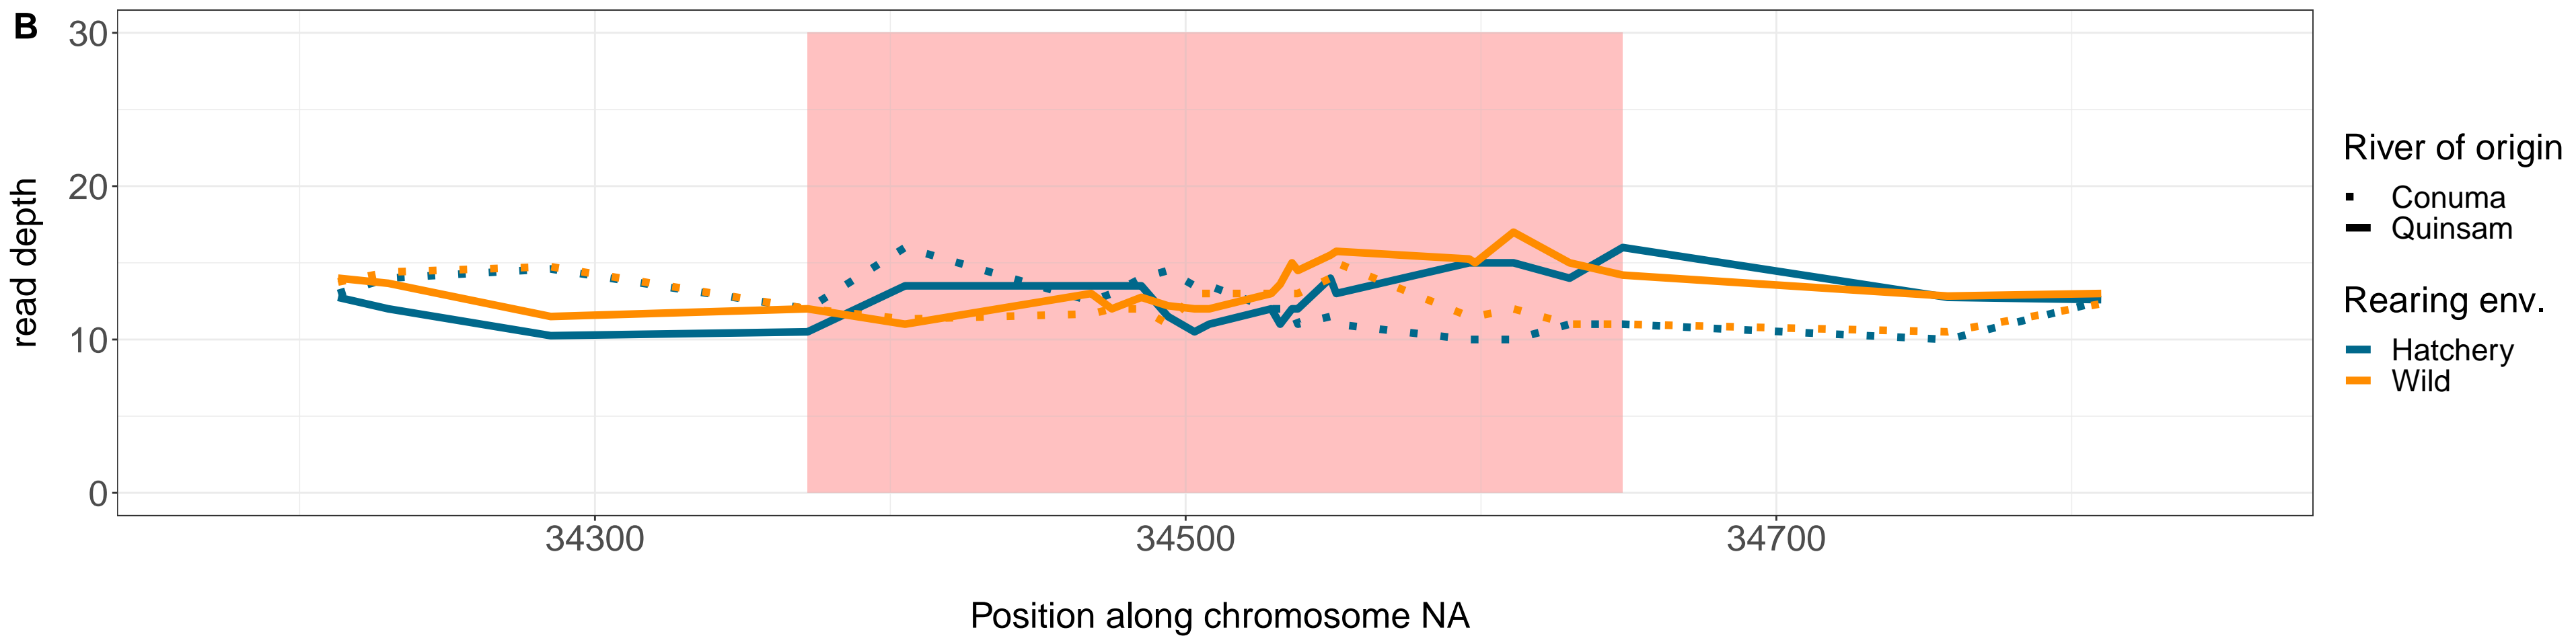

**A**

## DMR\_26

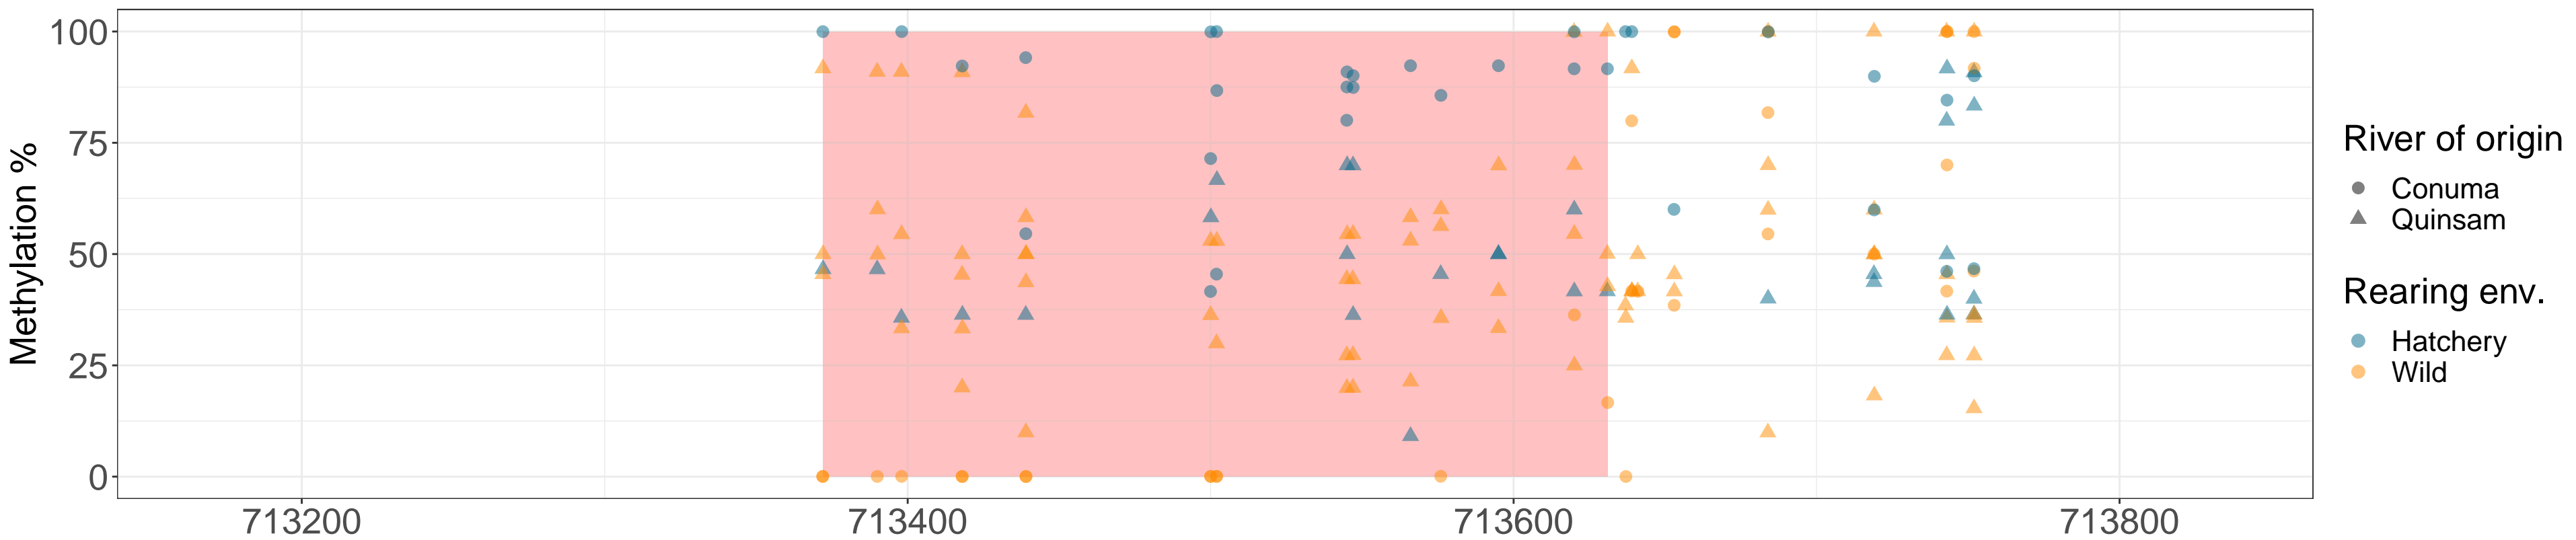**B**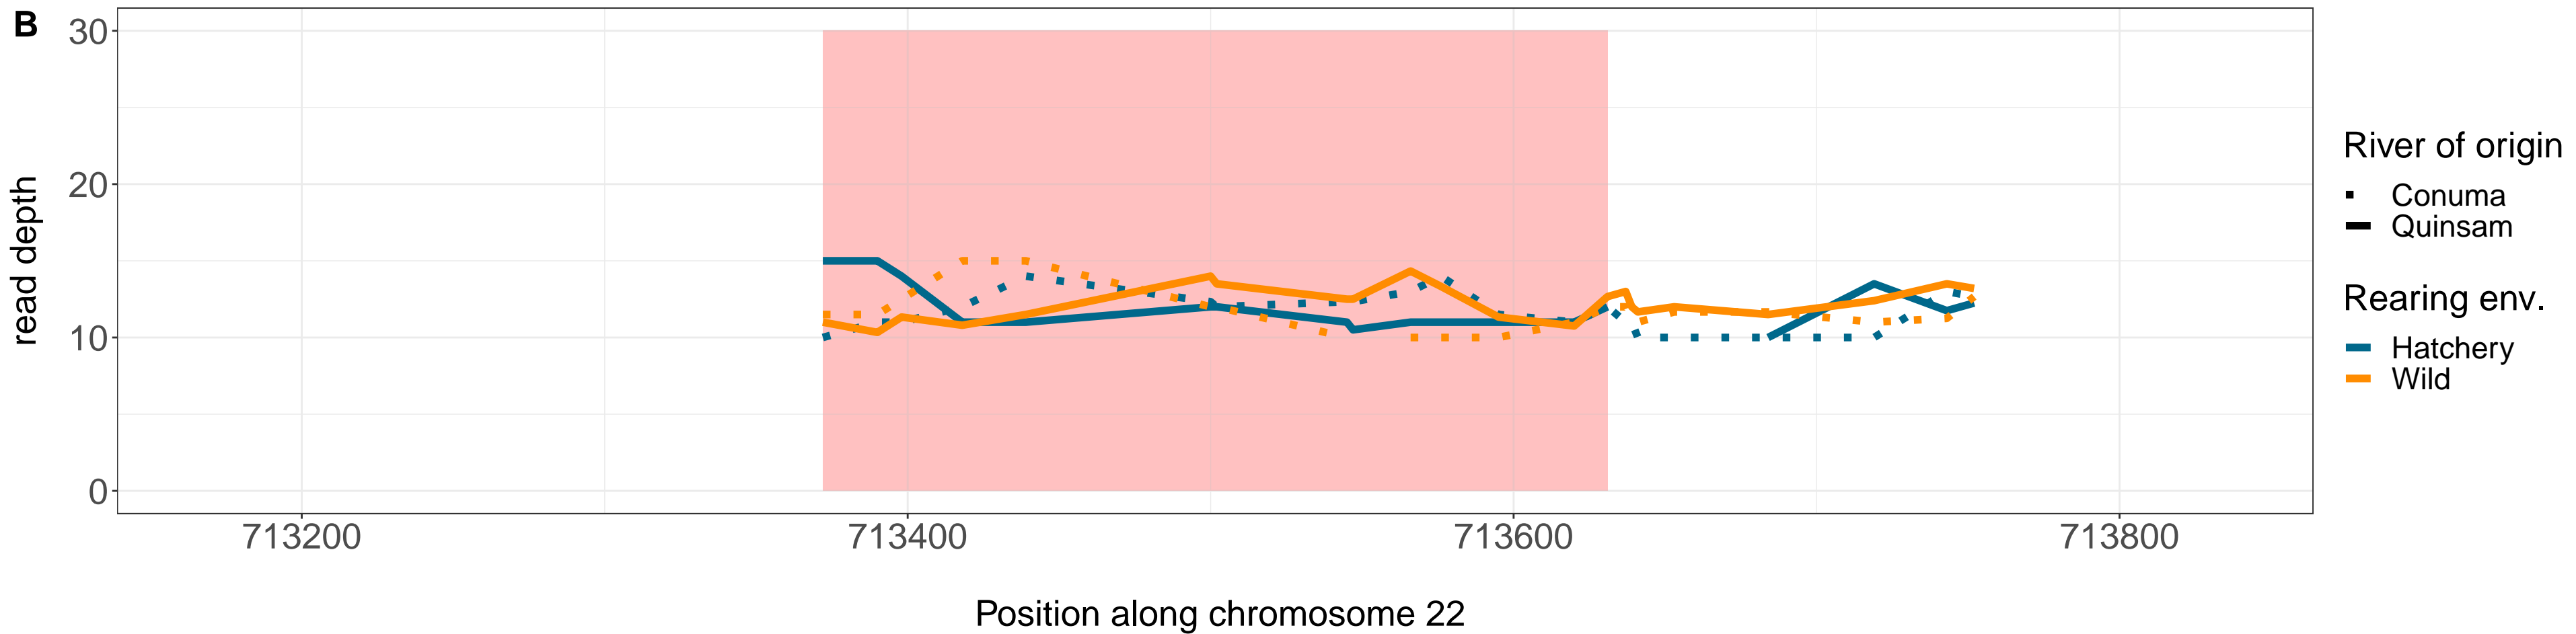

**A**

## DMR\_27

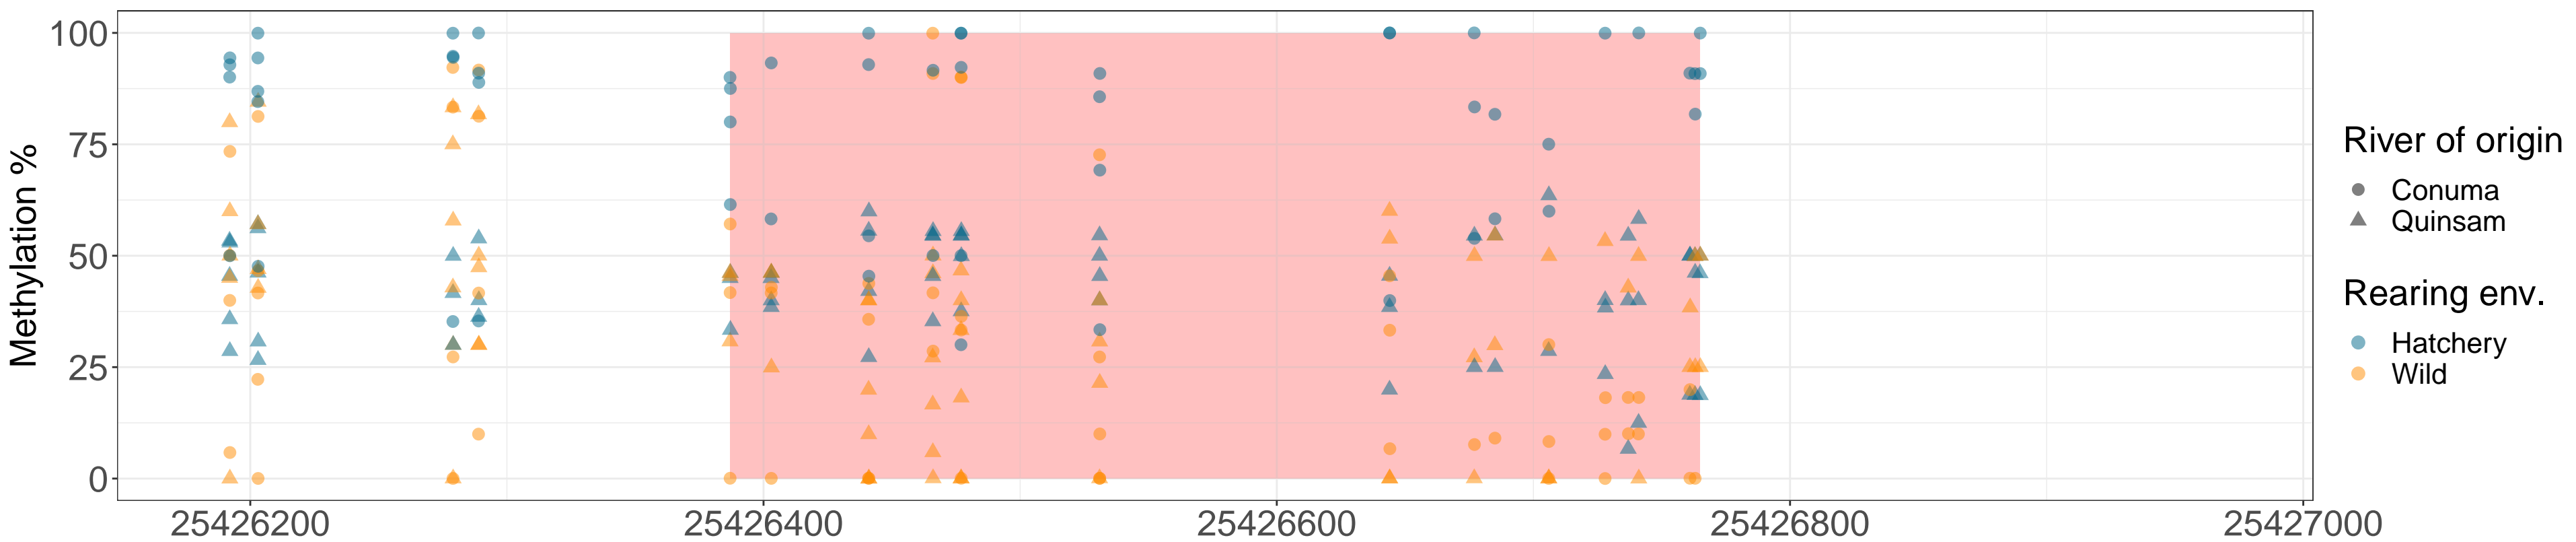**B**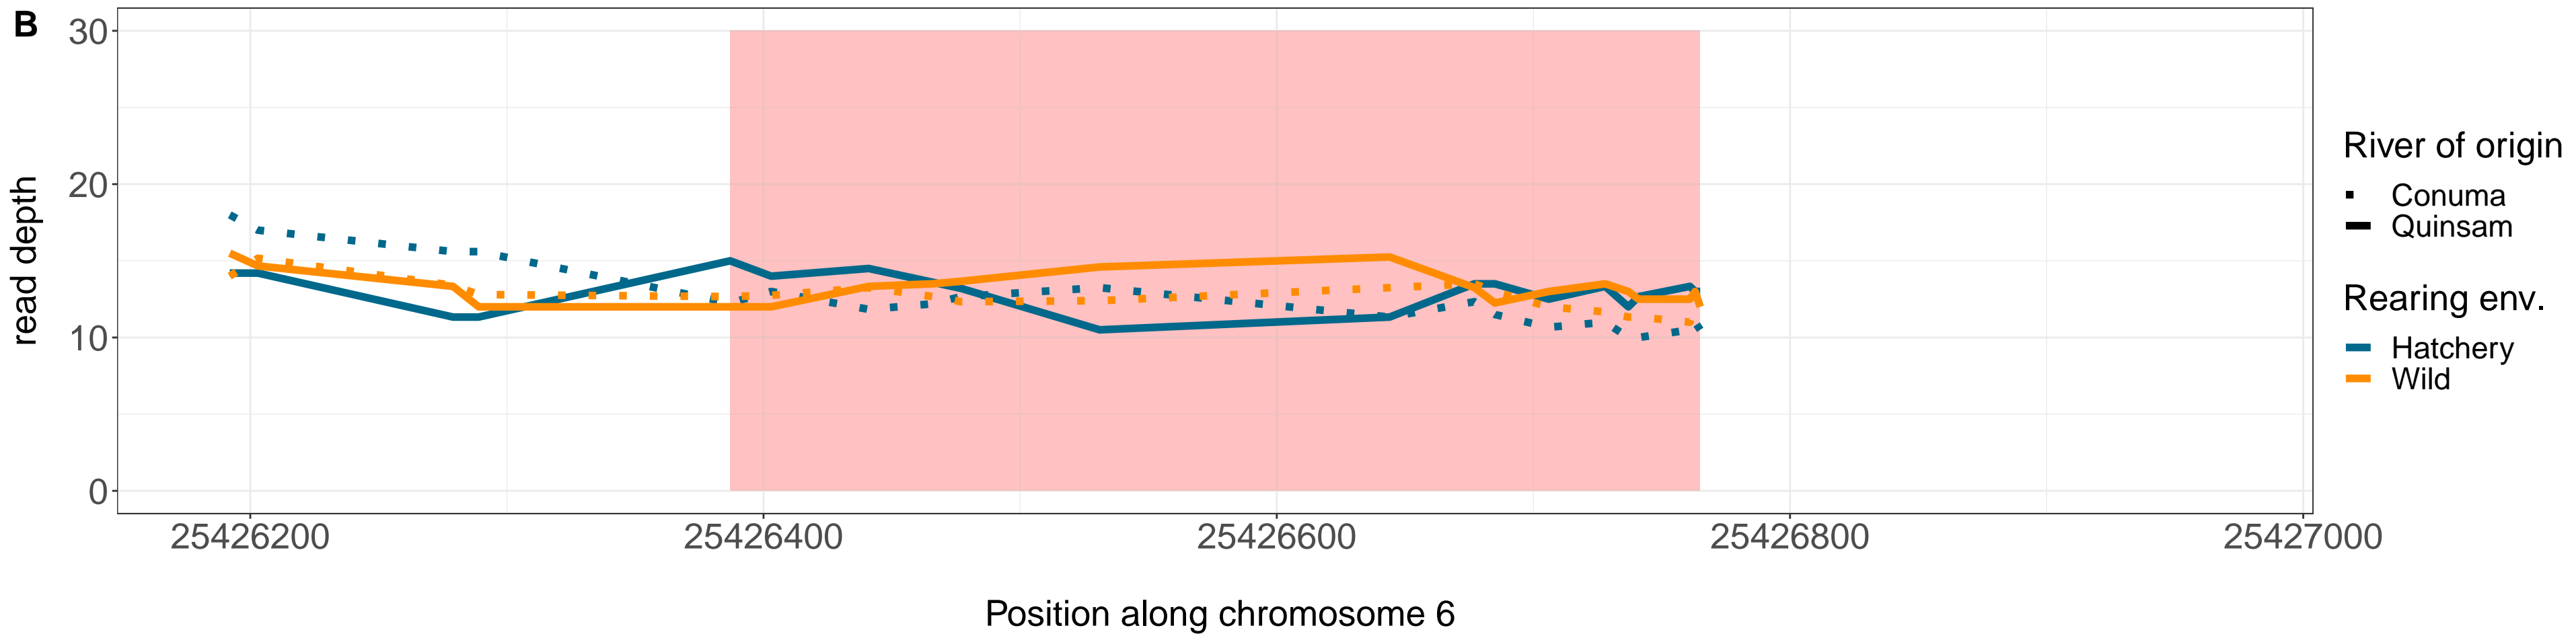

**A**

DMR\_28

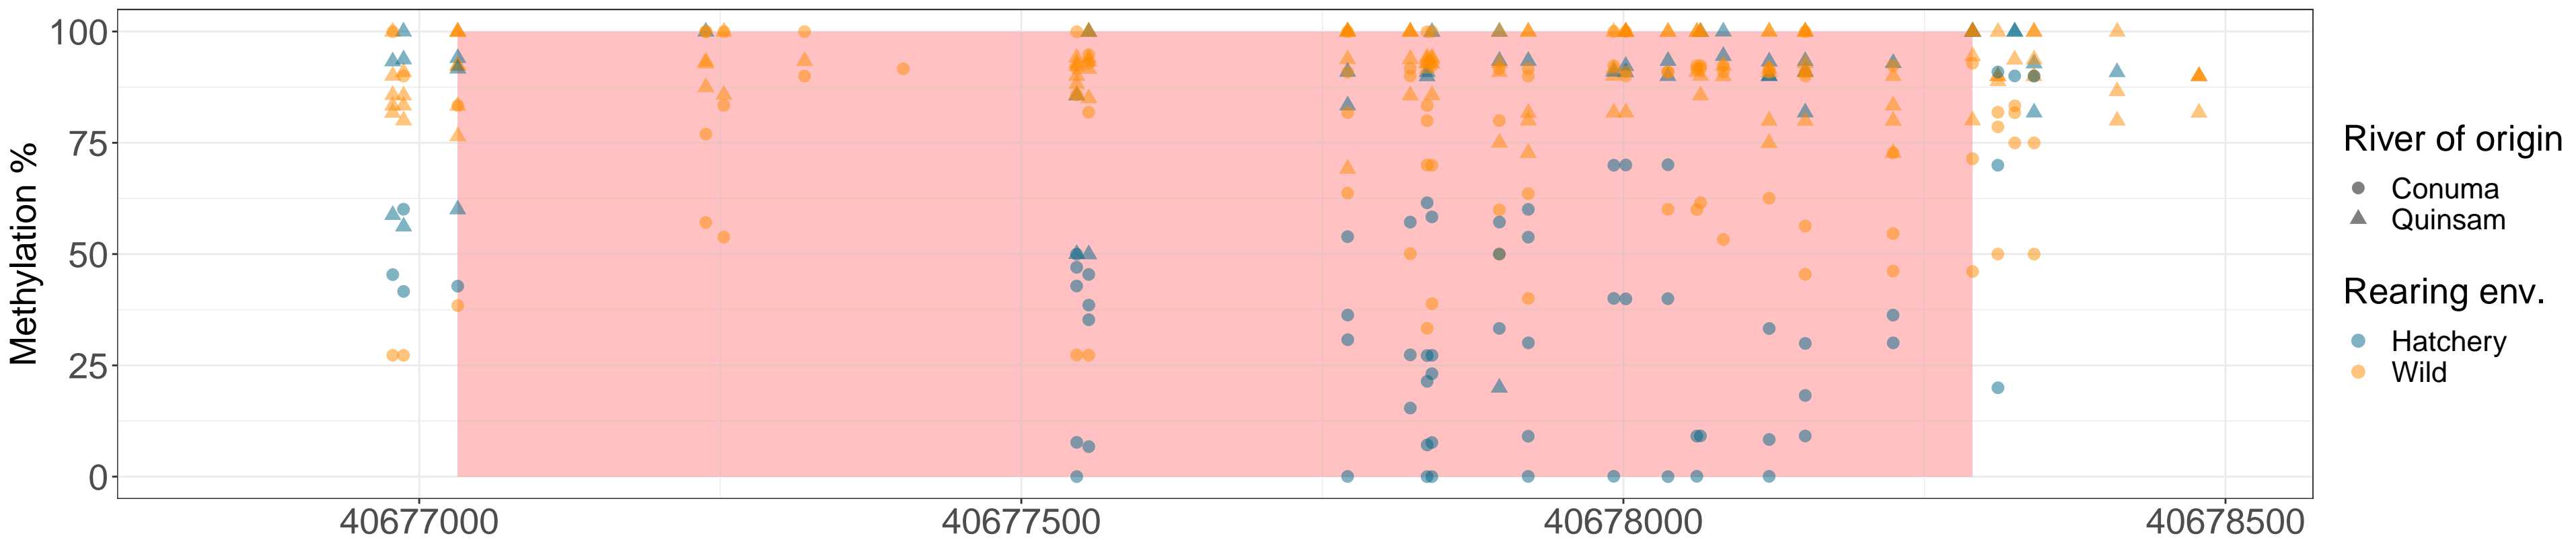**B**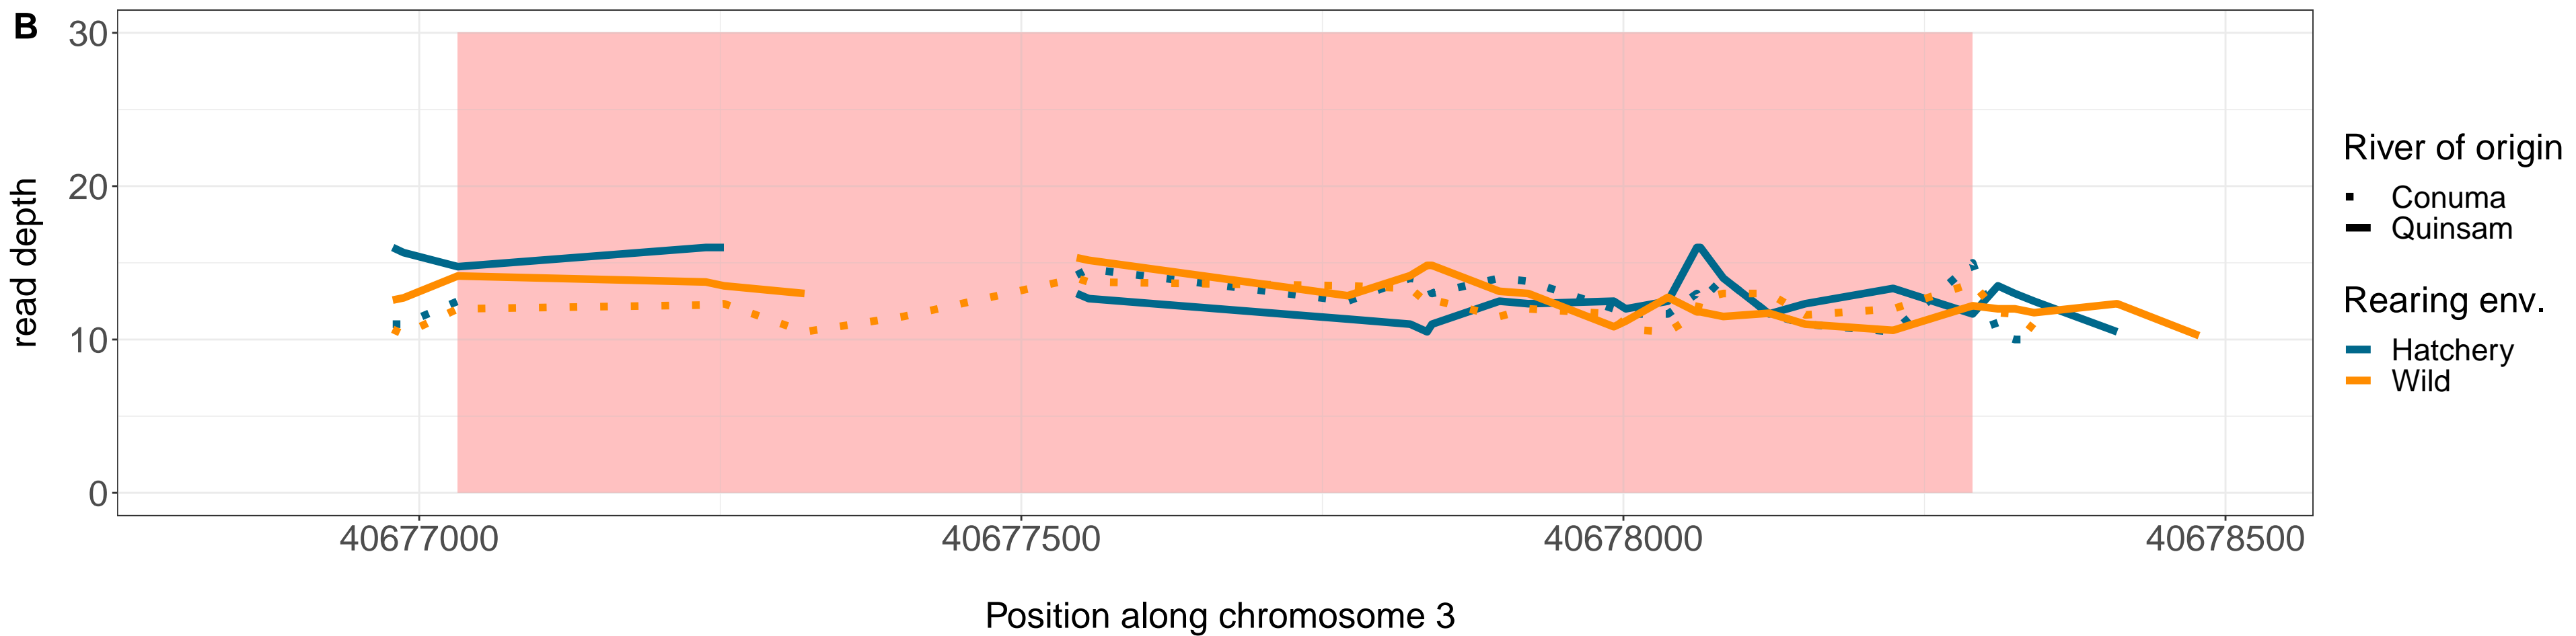

# DMR\_29

XM\_020498569.1

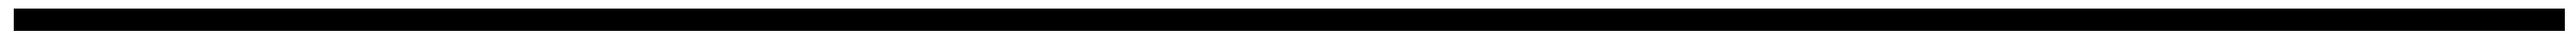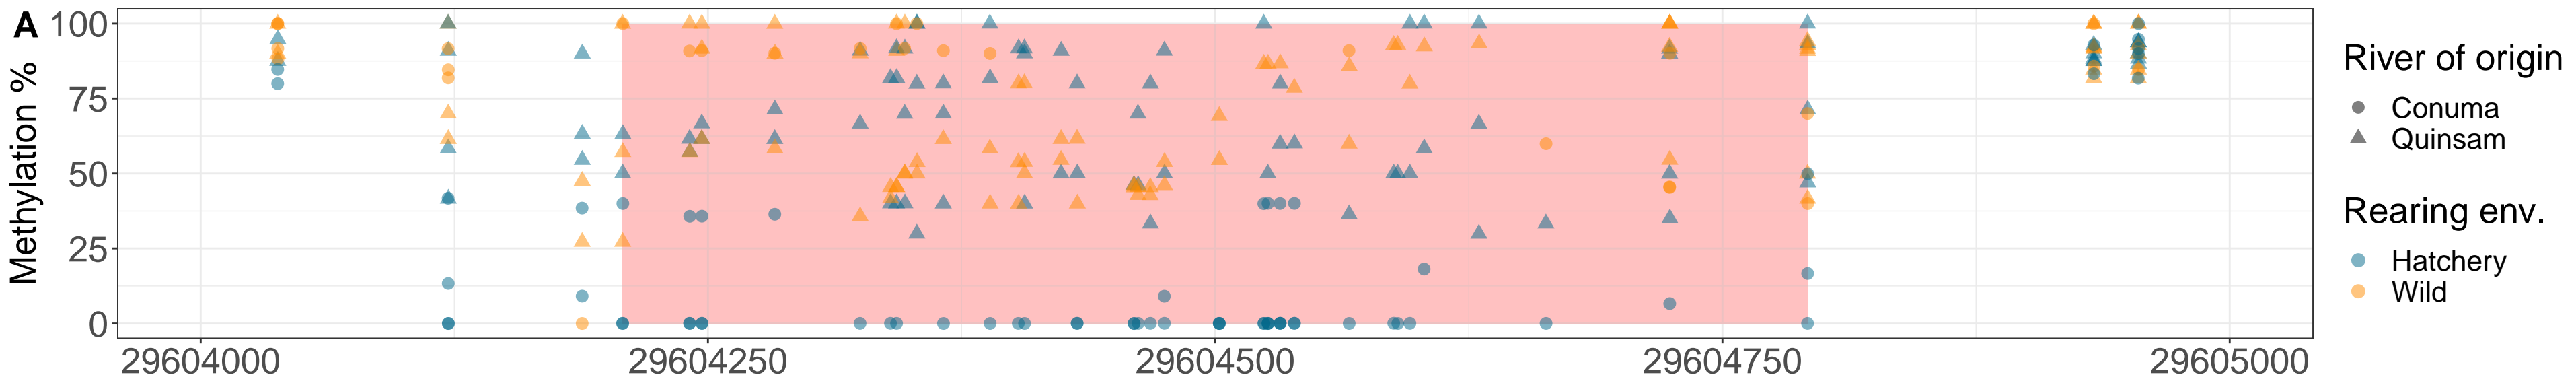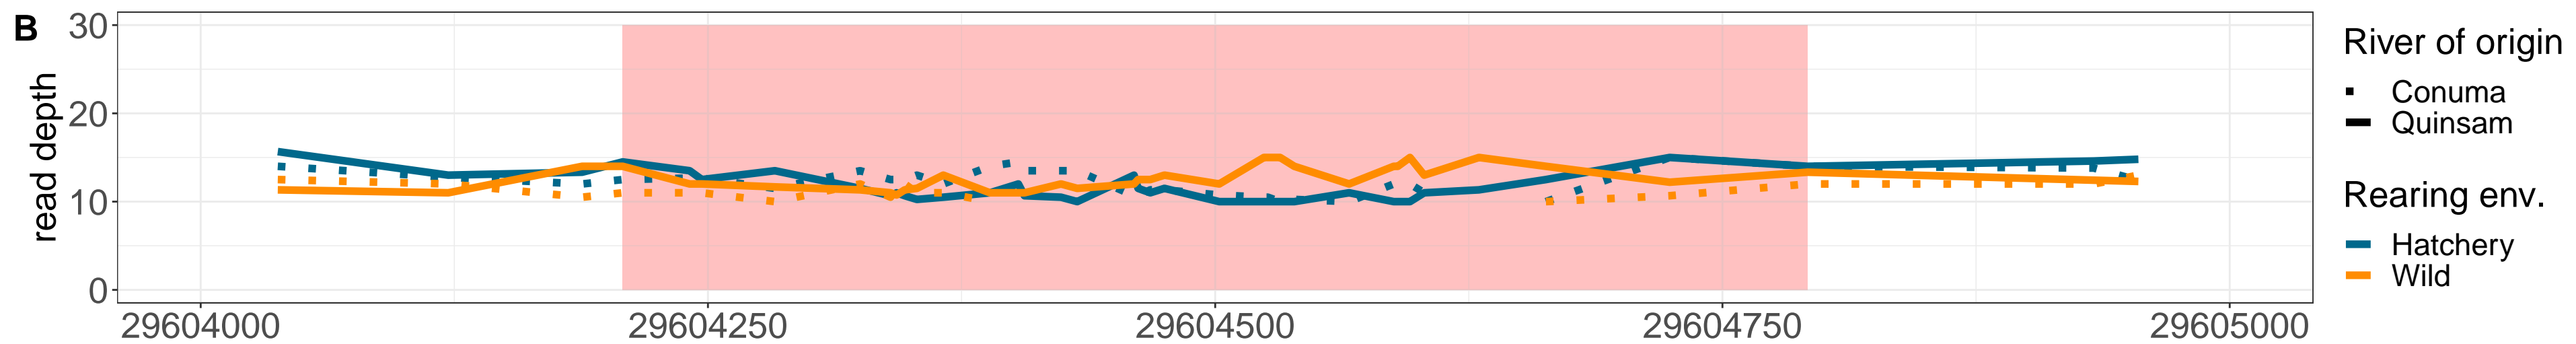

Position along chromosome 13

**A**

## DMR\_30

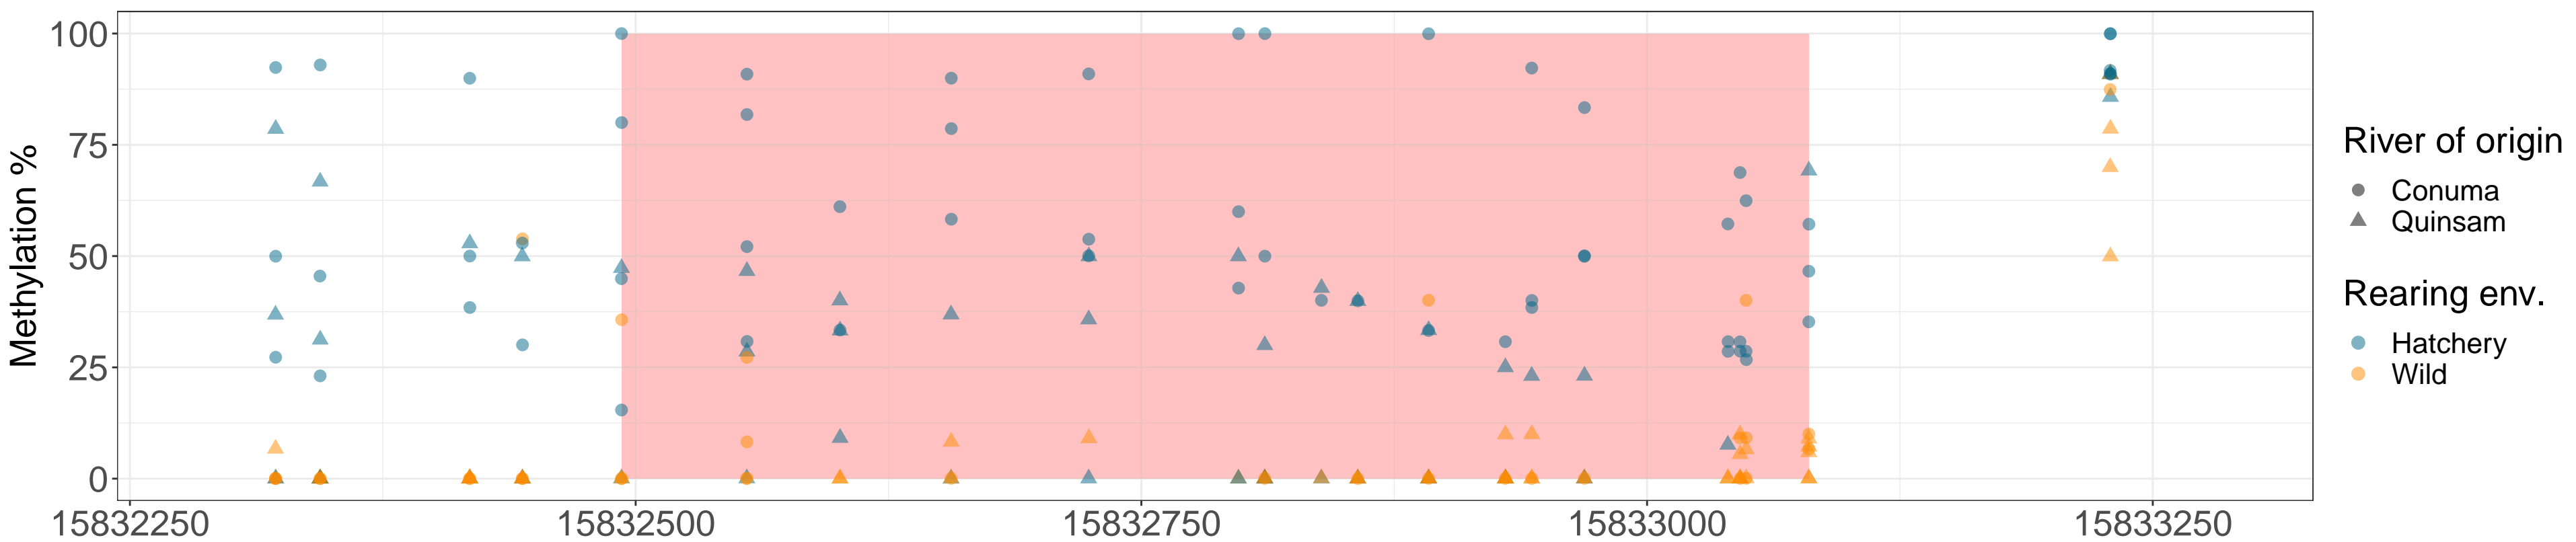**B**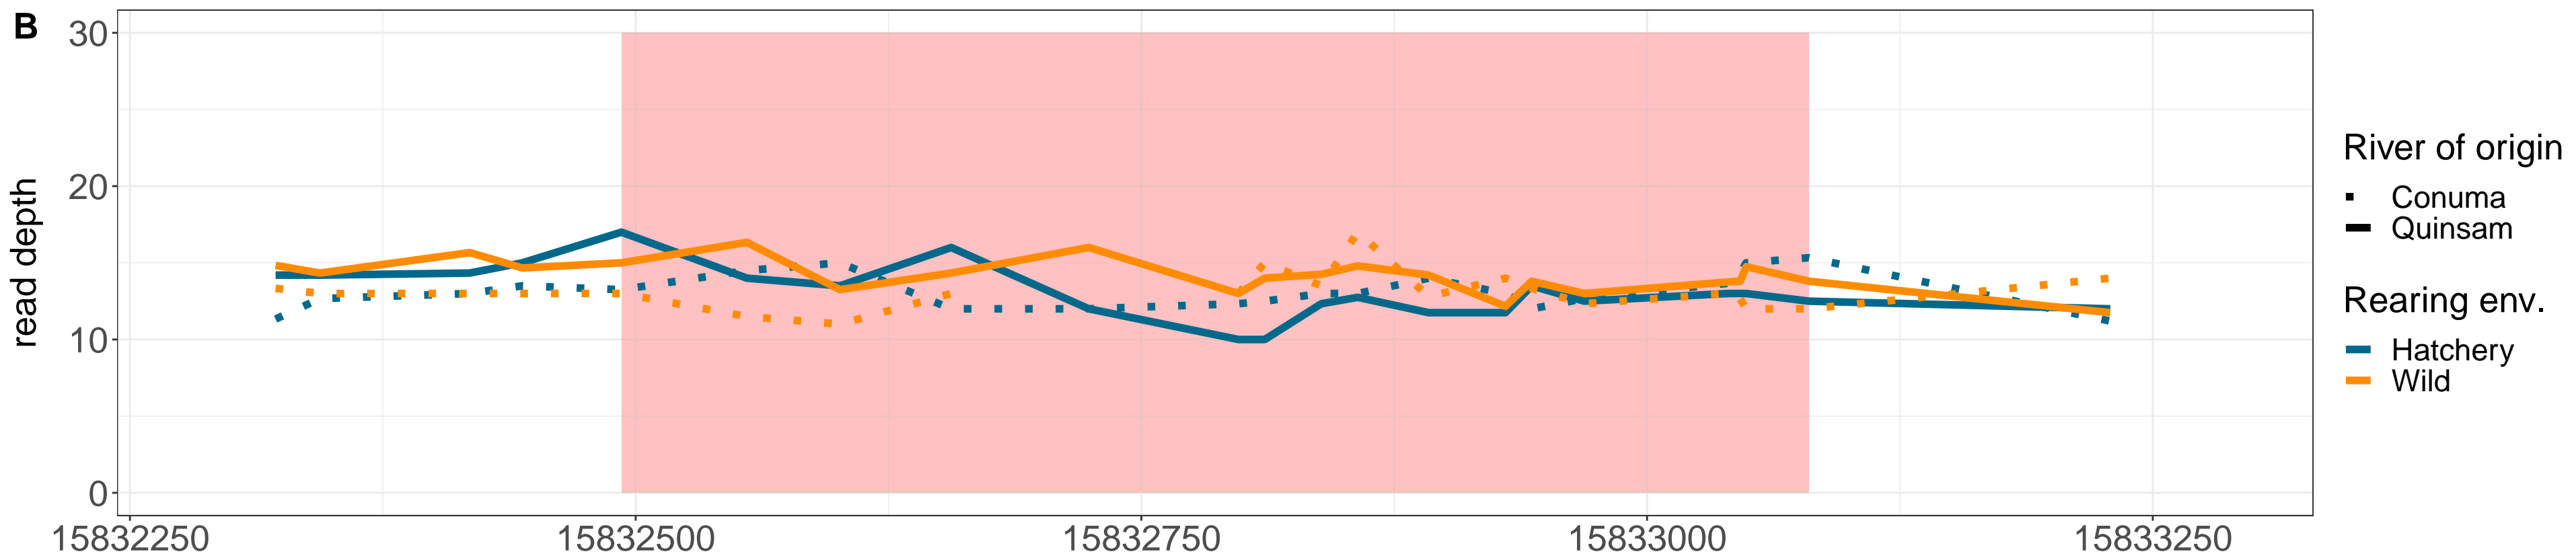

Position along chromosome 15

# DMR\_31

XM\_020455141.1

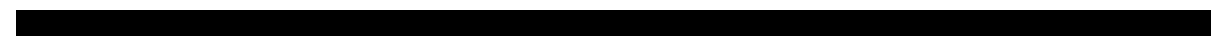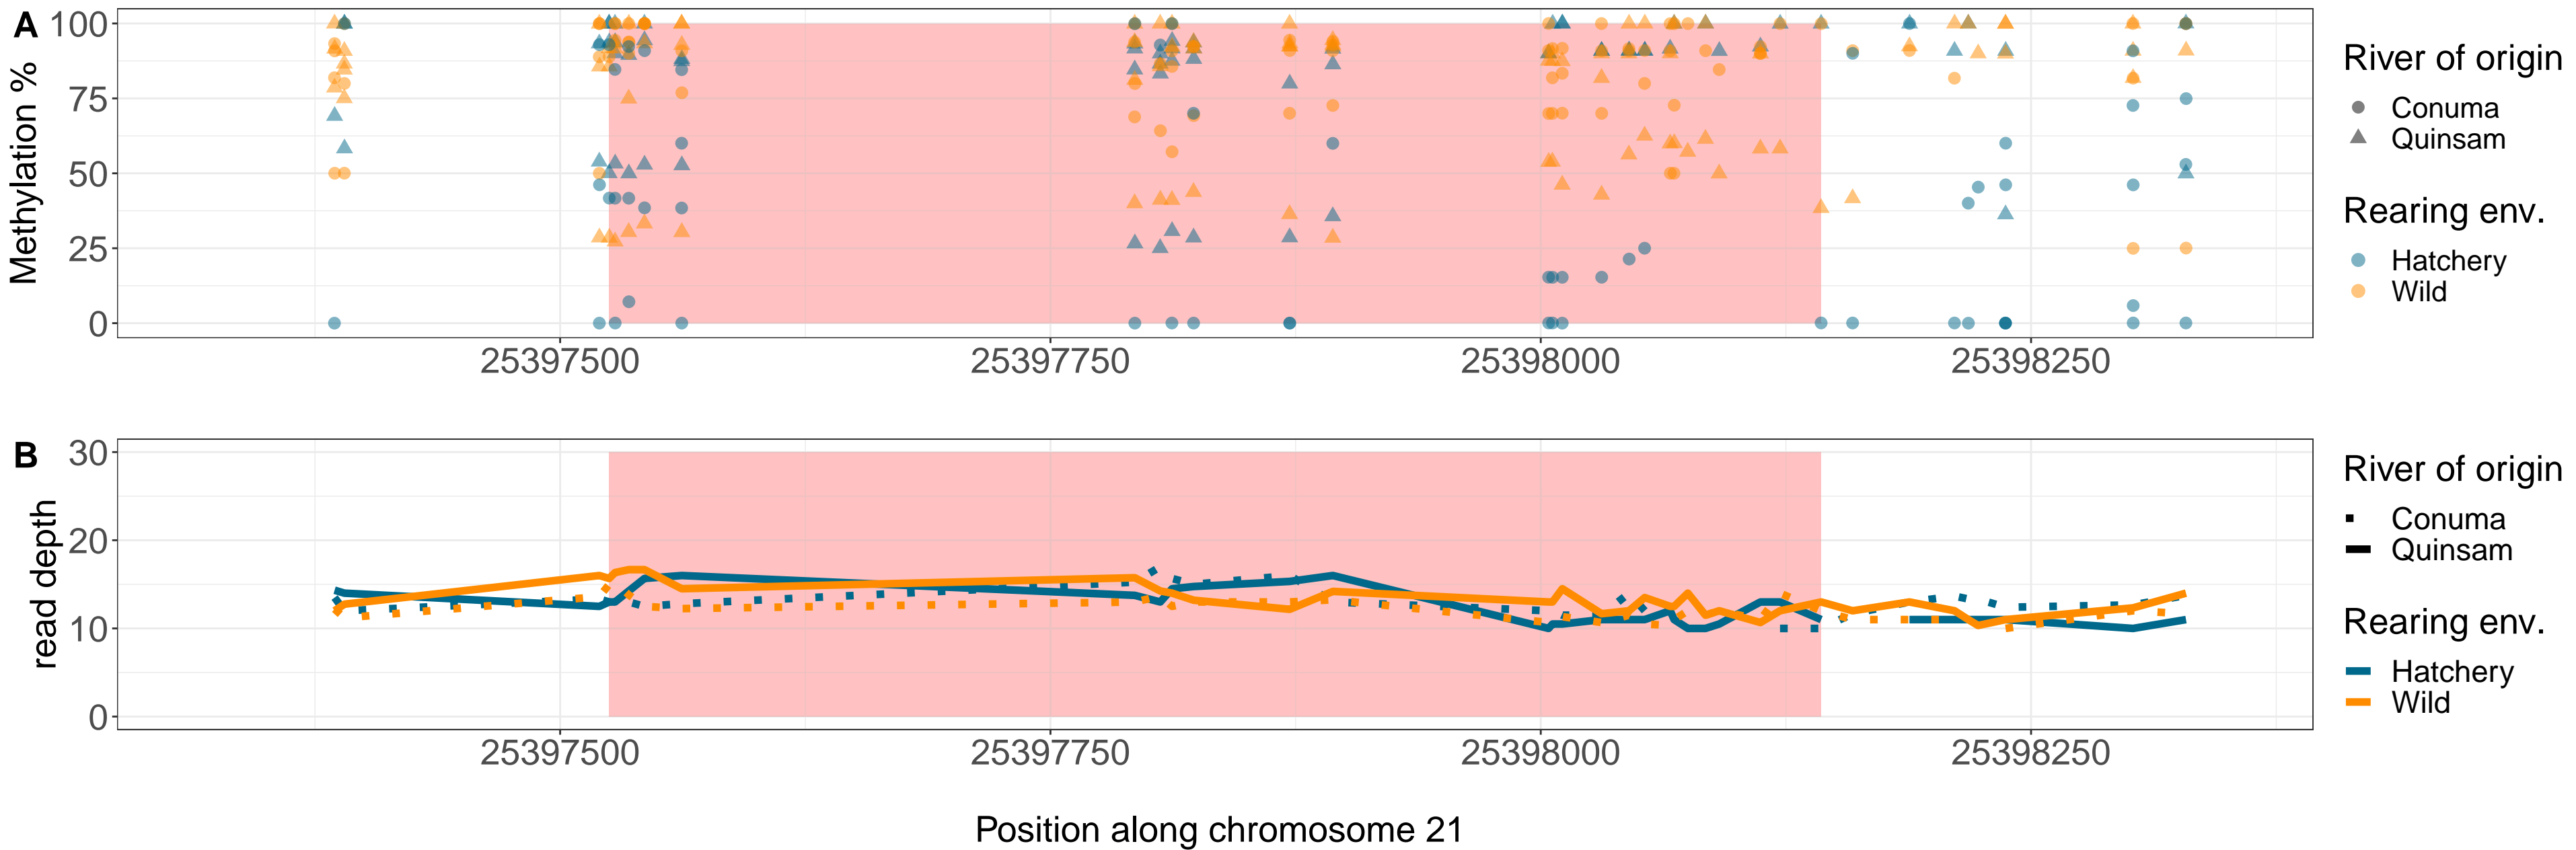

# DMR\_32

XM\_020457788.1

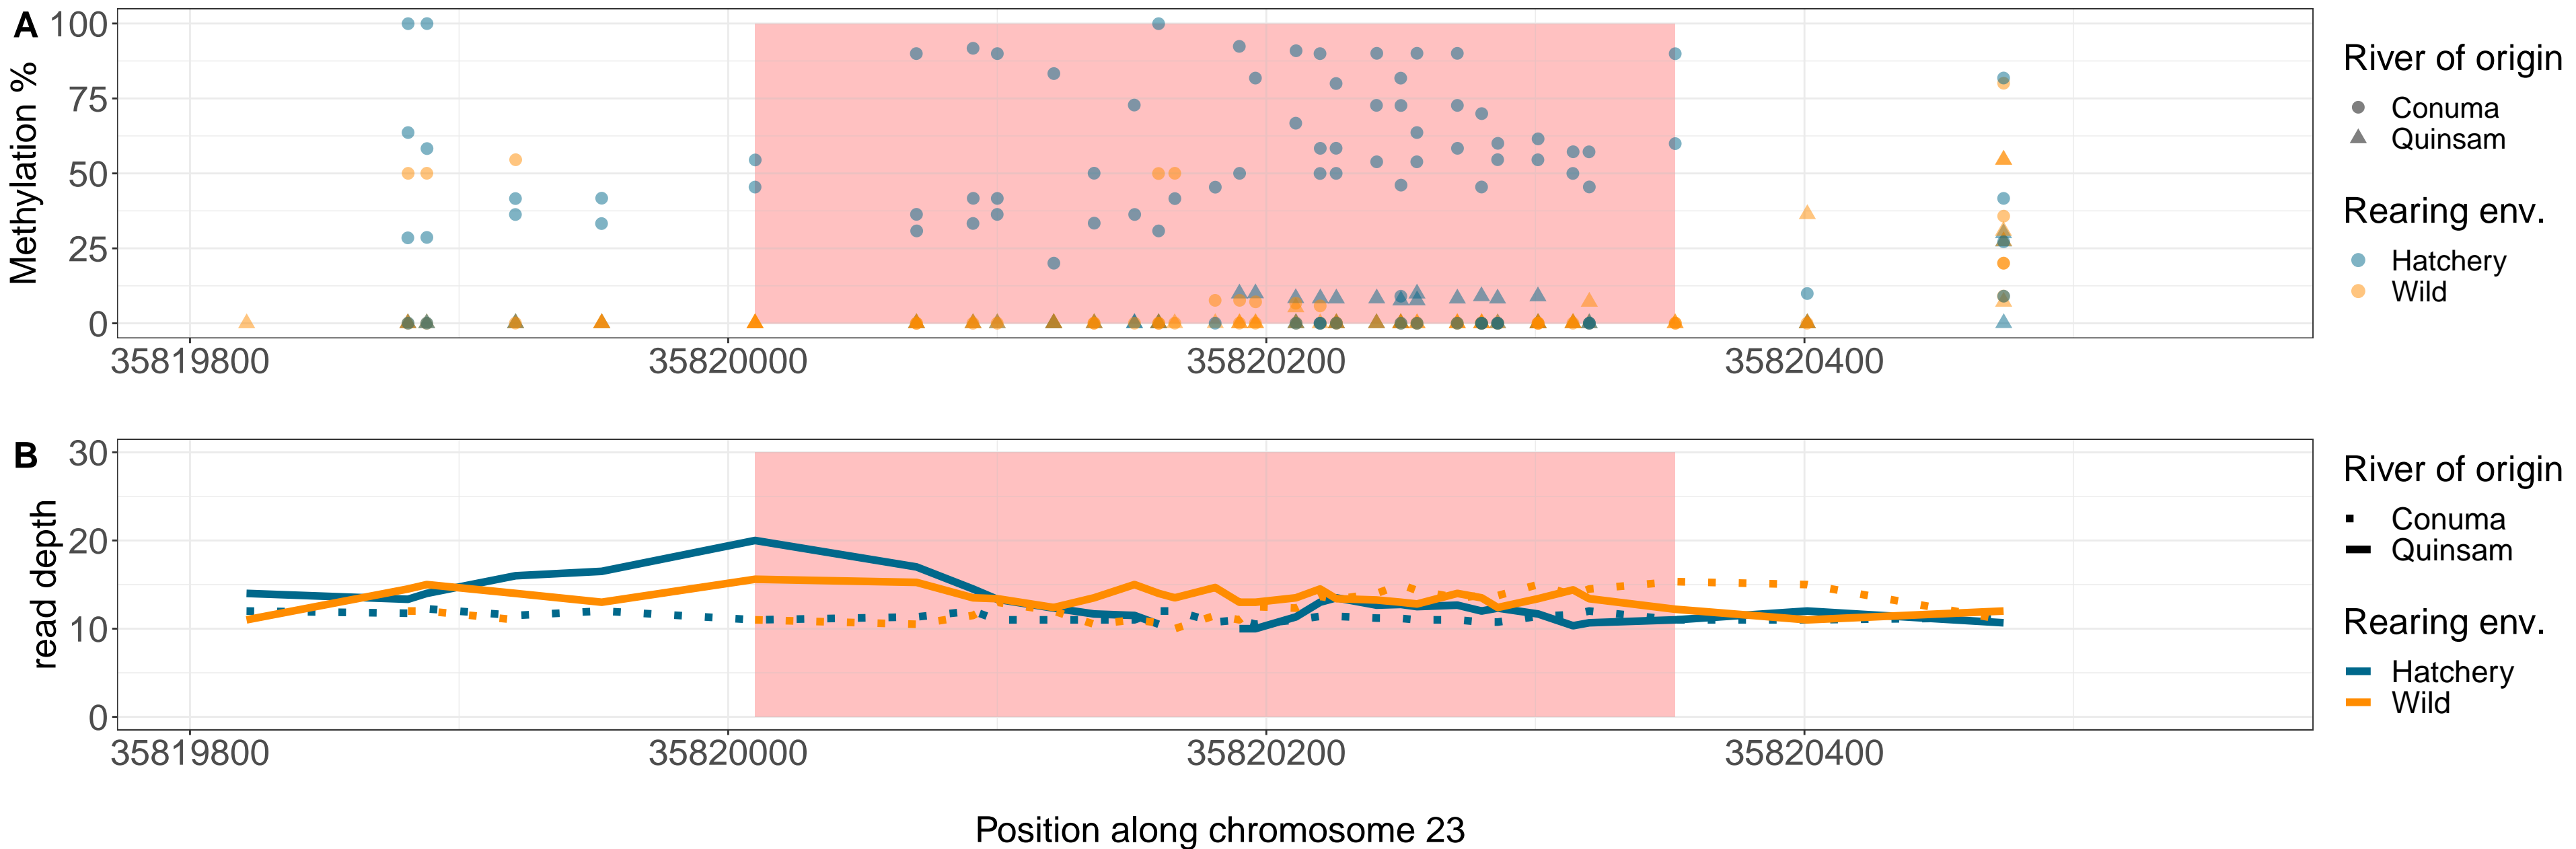



# DMR\_33

XM\_020464237.1

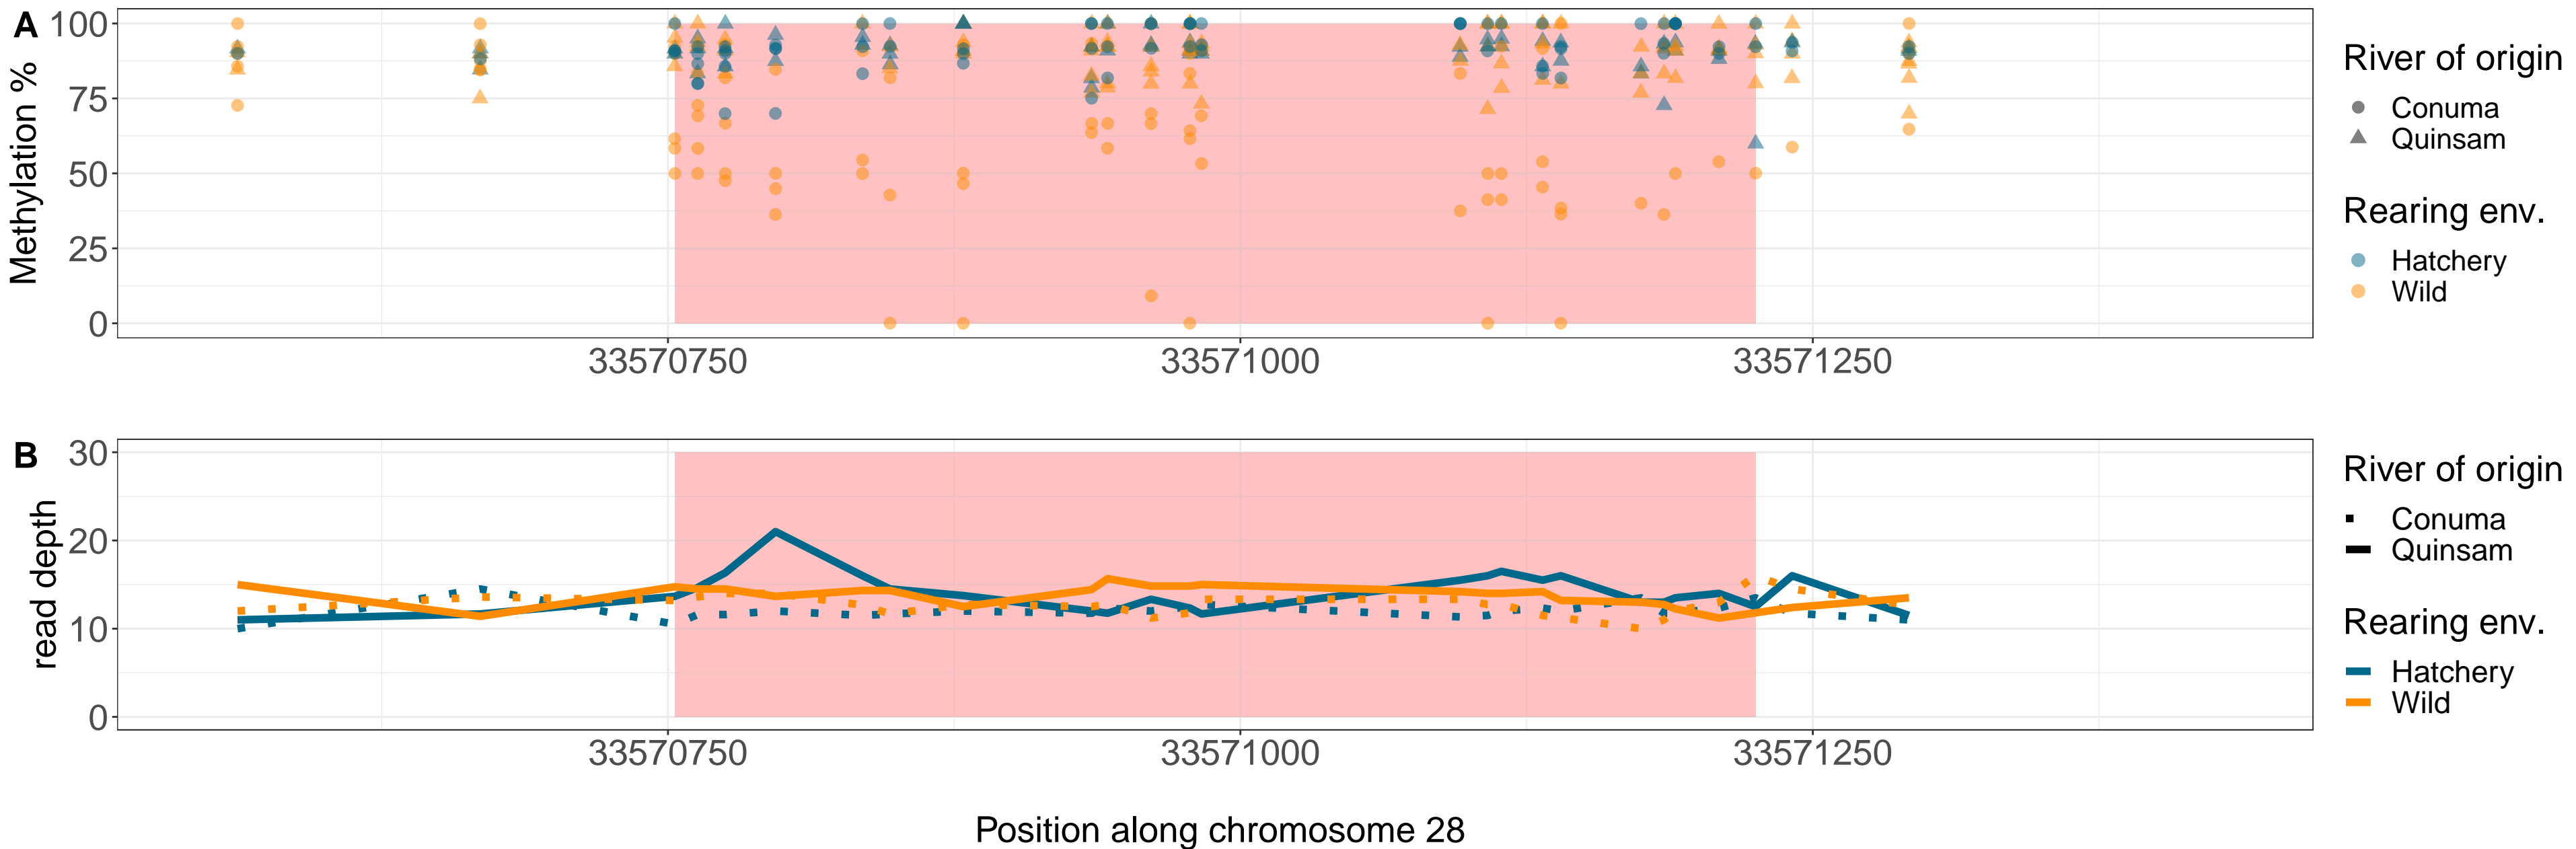

**A**

## DMR\_34

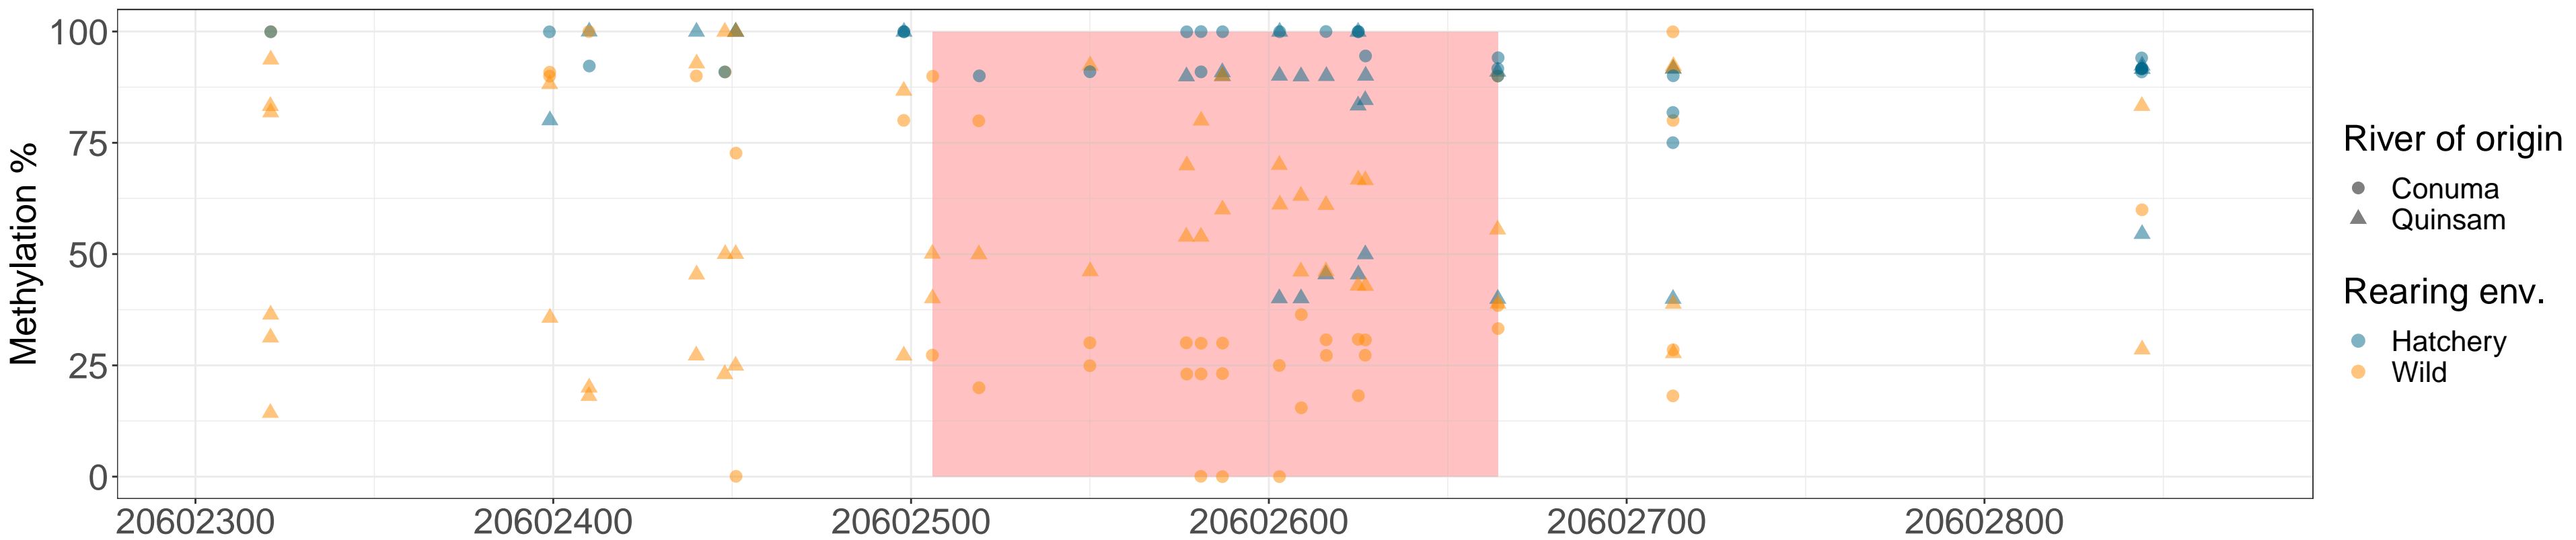**B**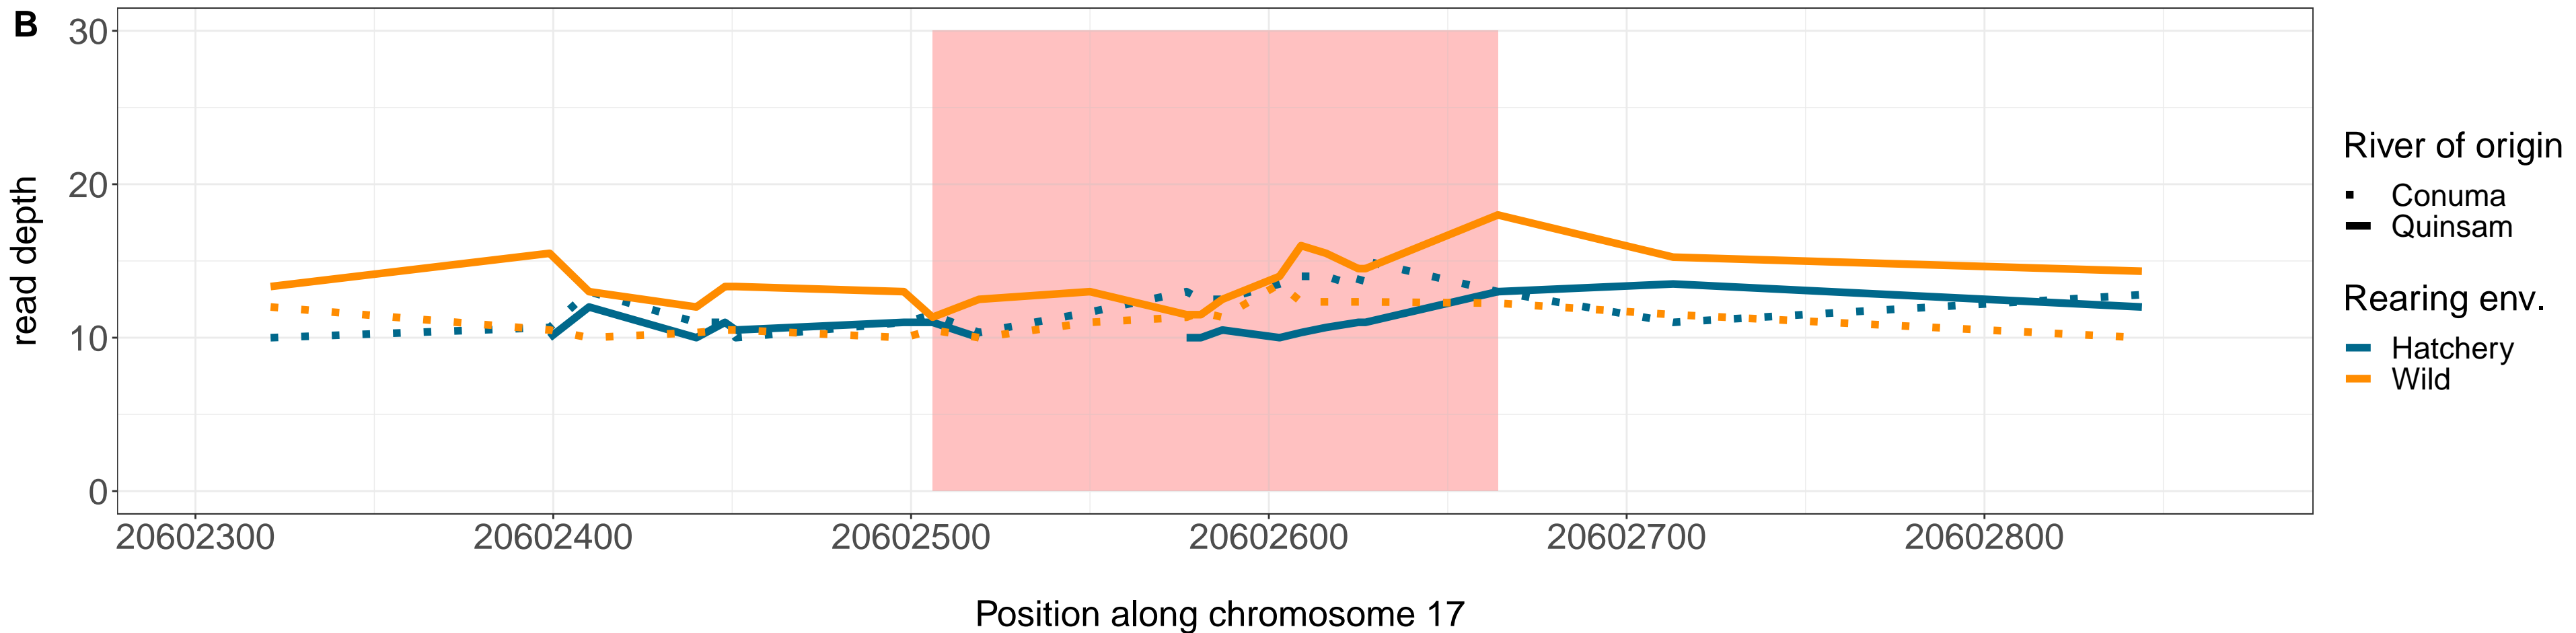

**A**

## DMR\_35

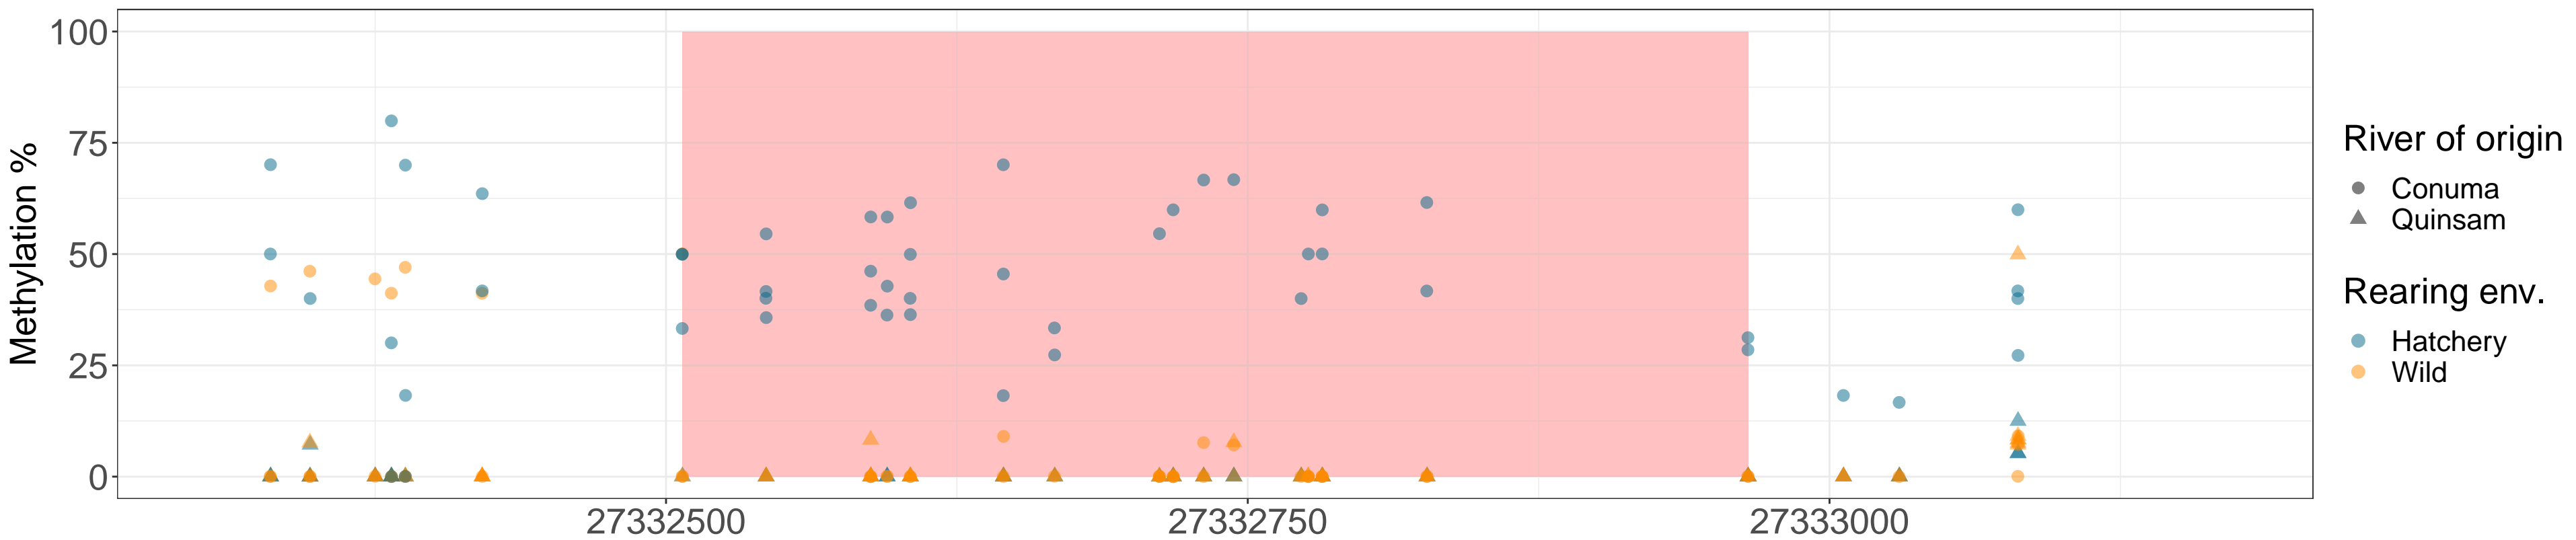**B**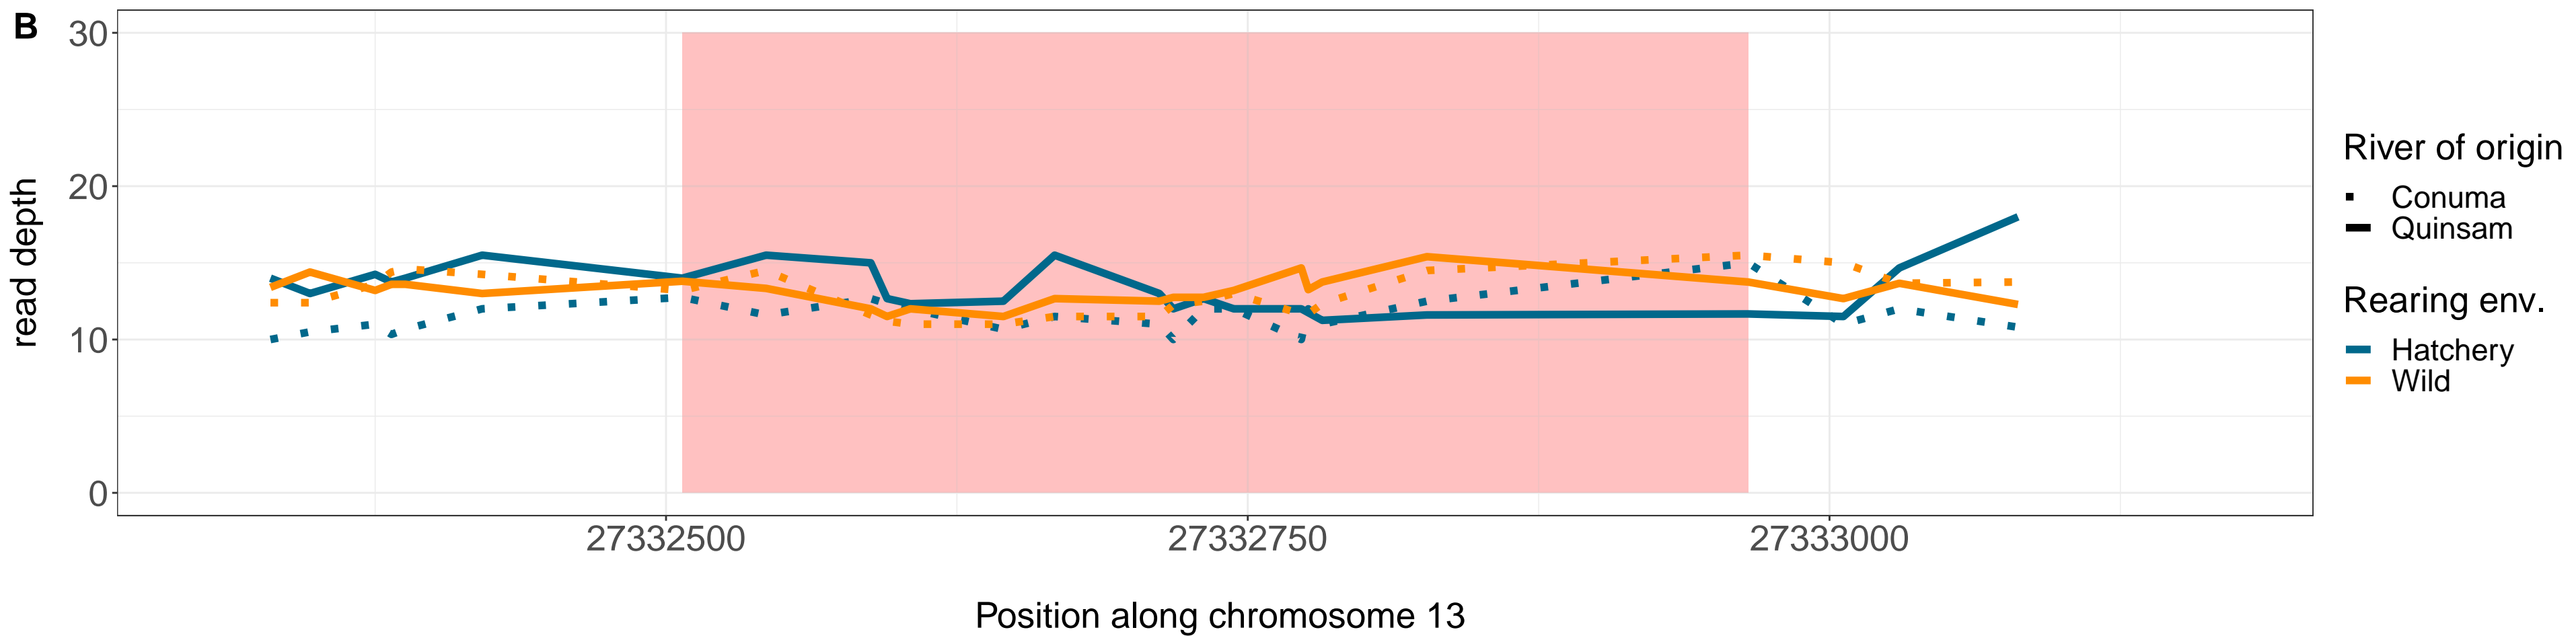

# DMR\_36

XM\_020477866.1

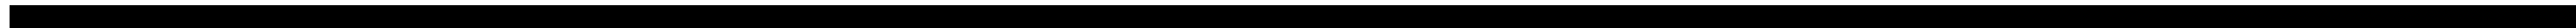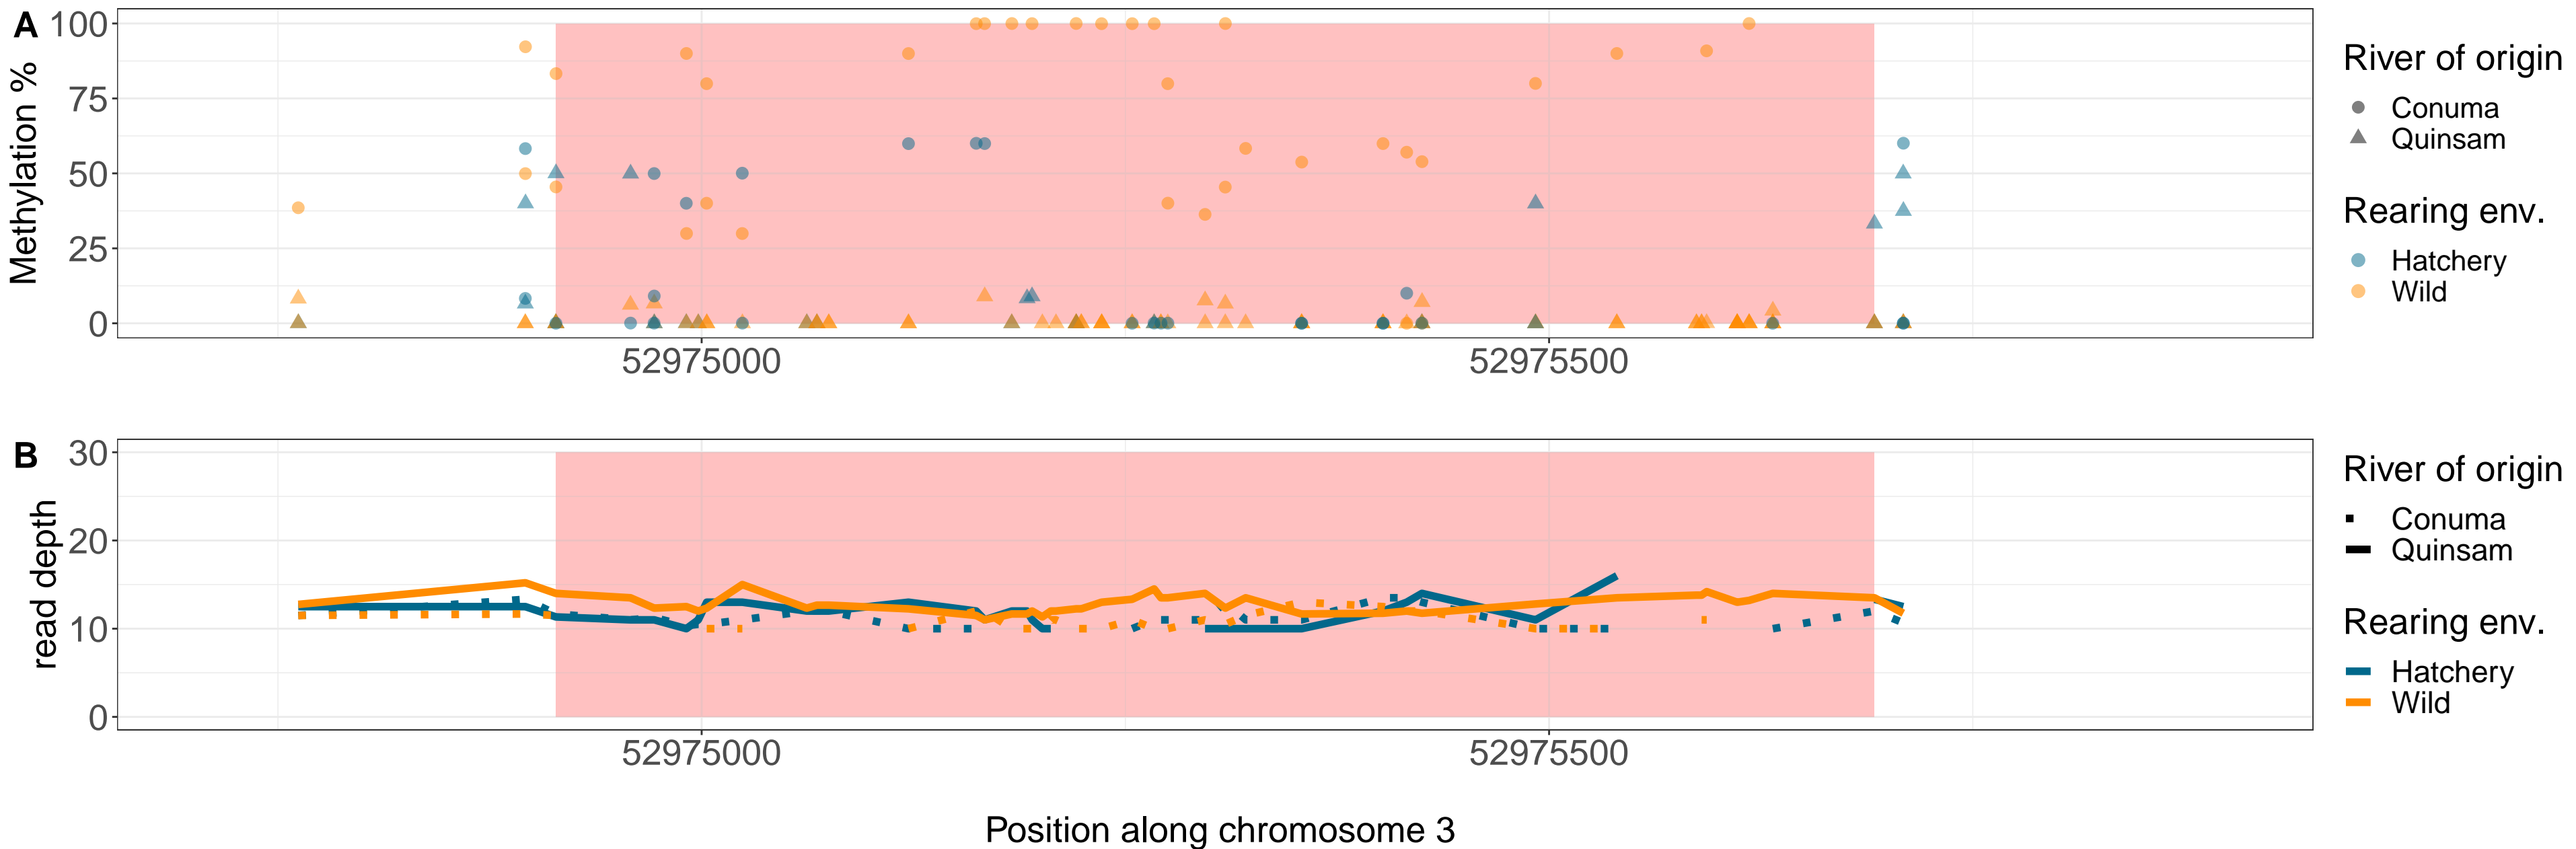

**A**

DMR\_37

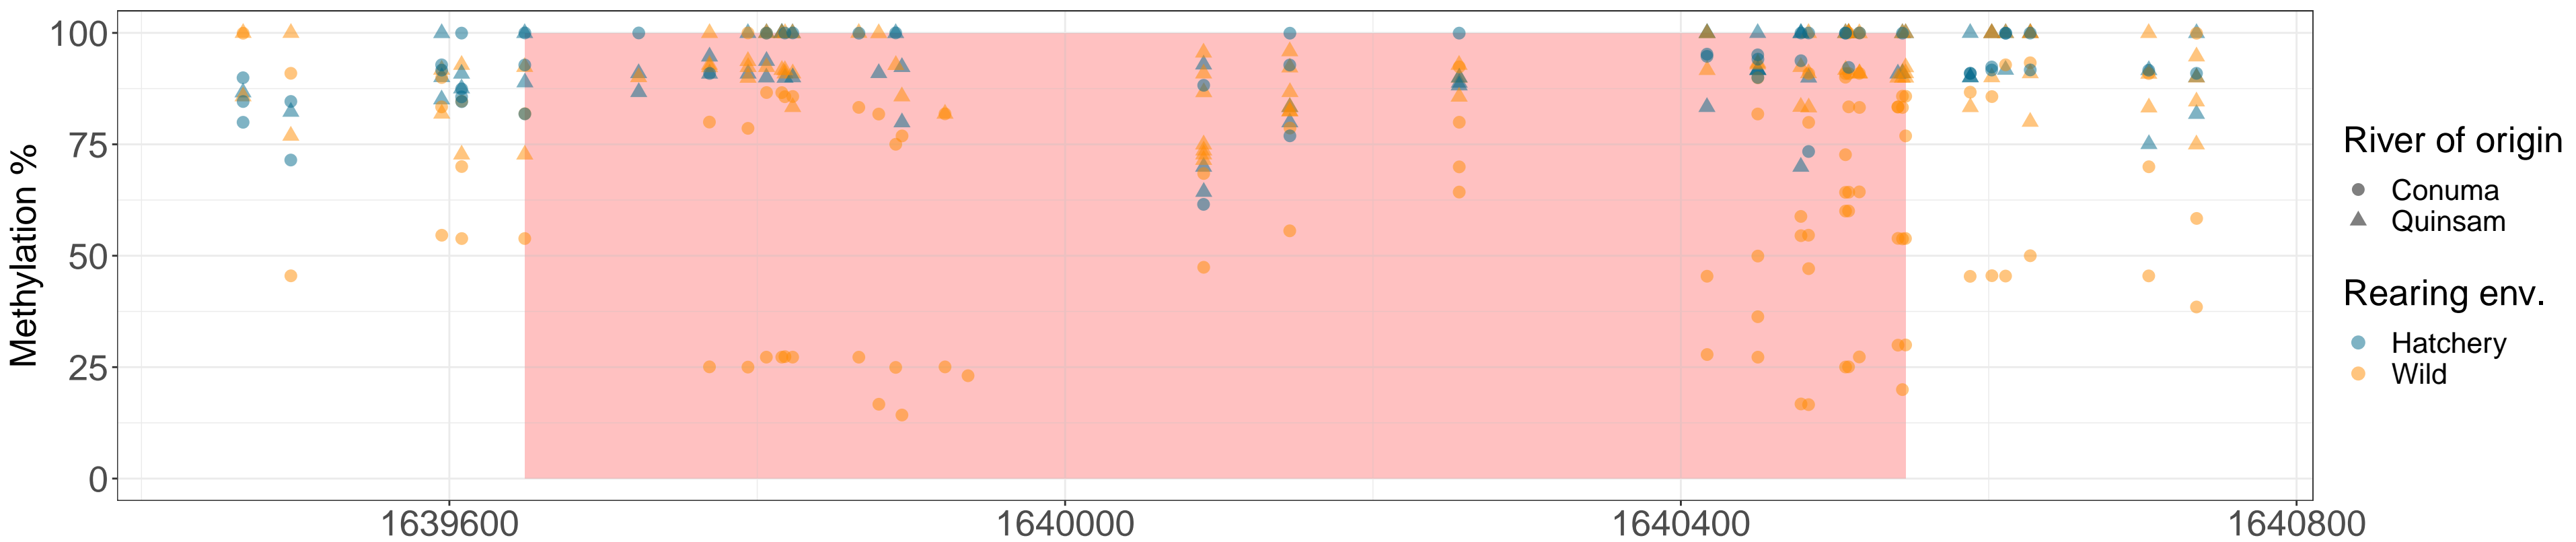**B**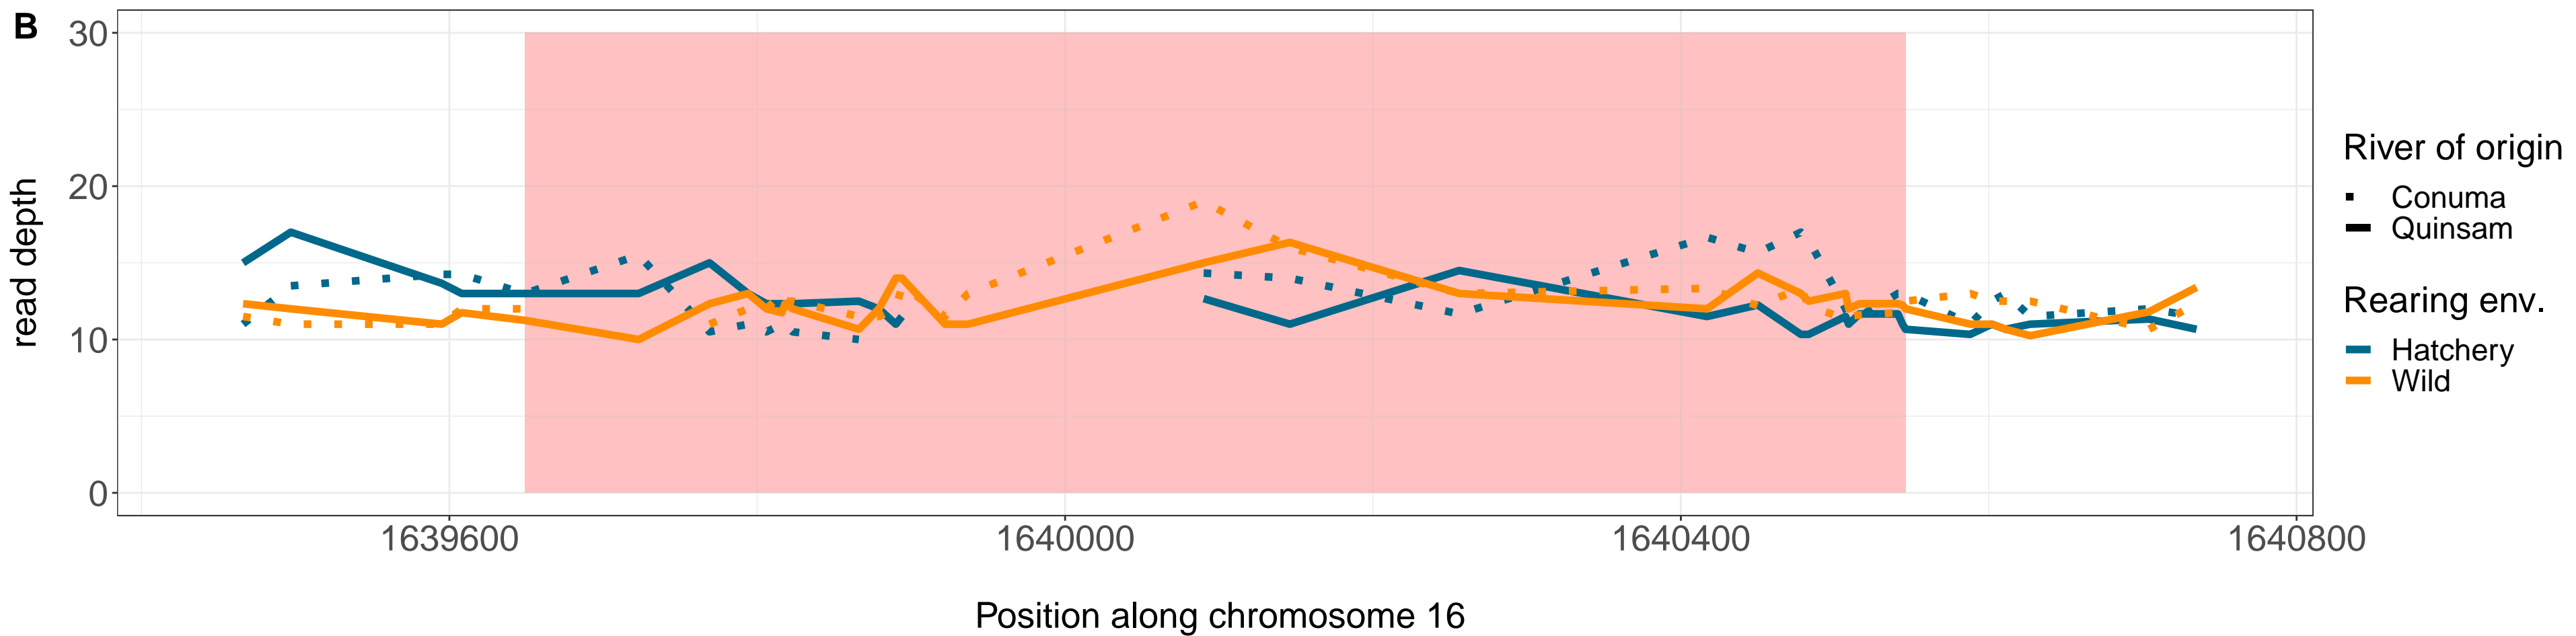

# DMR\_38

XM\_020463485.1

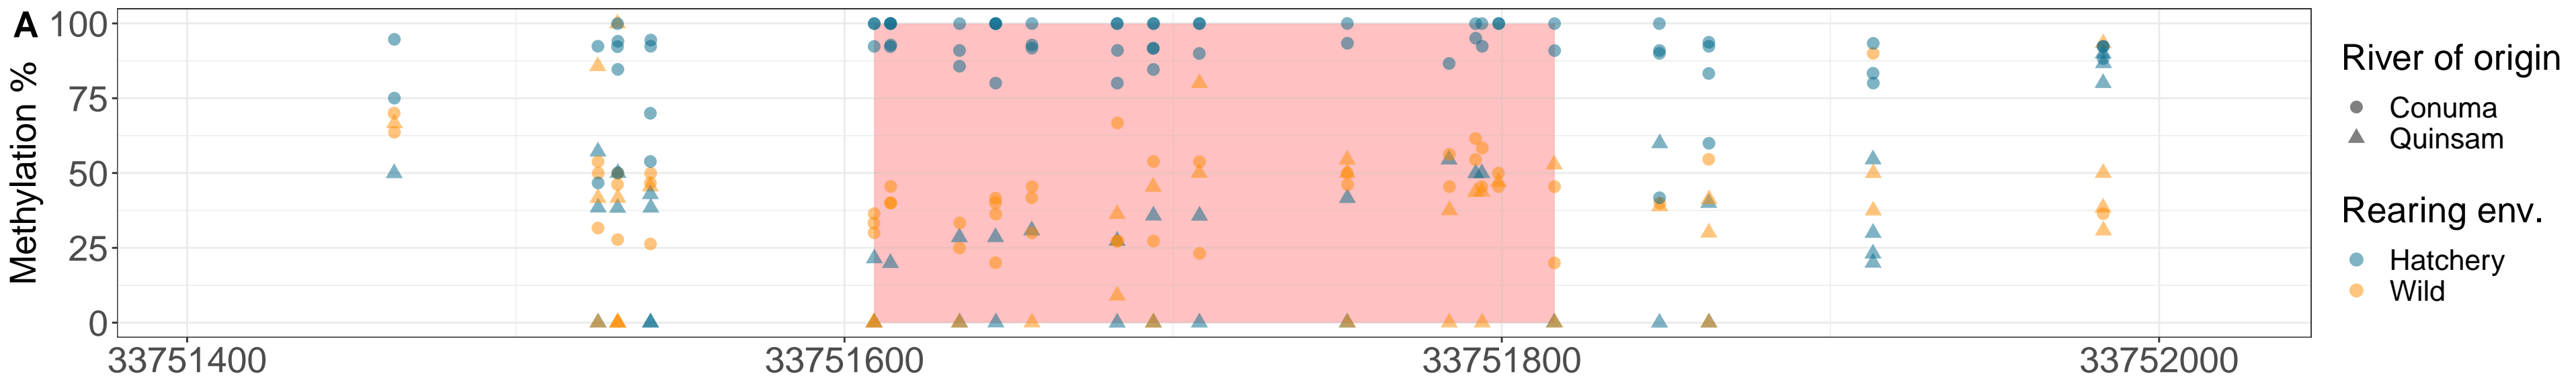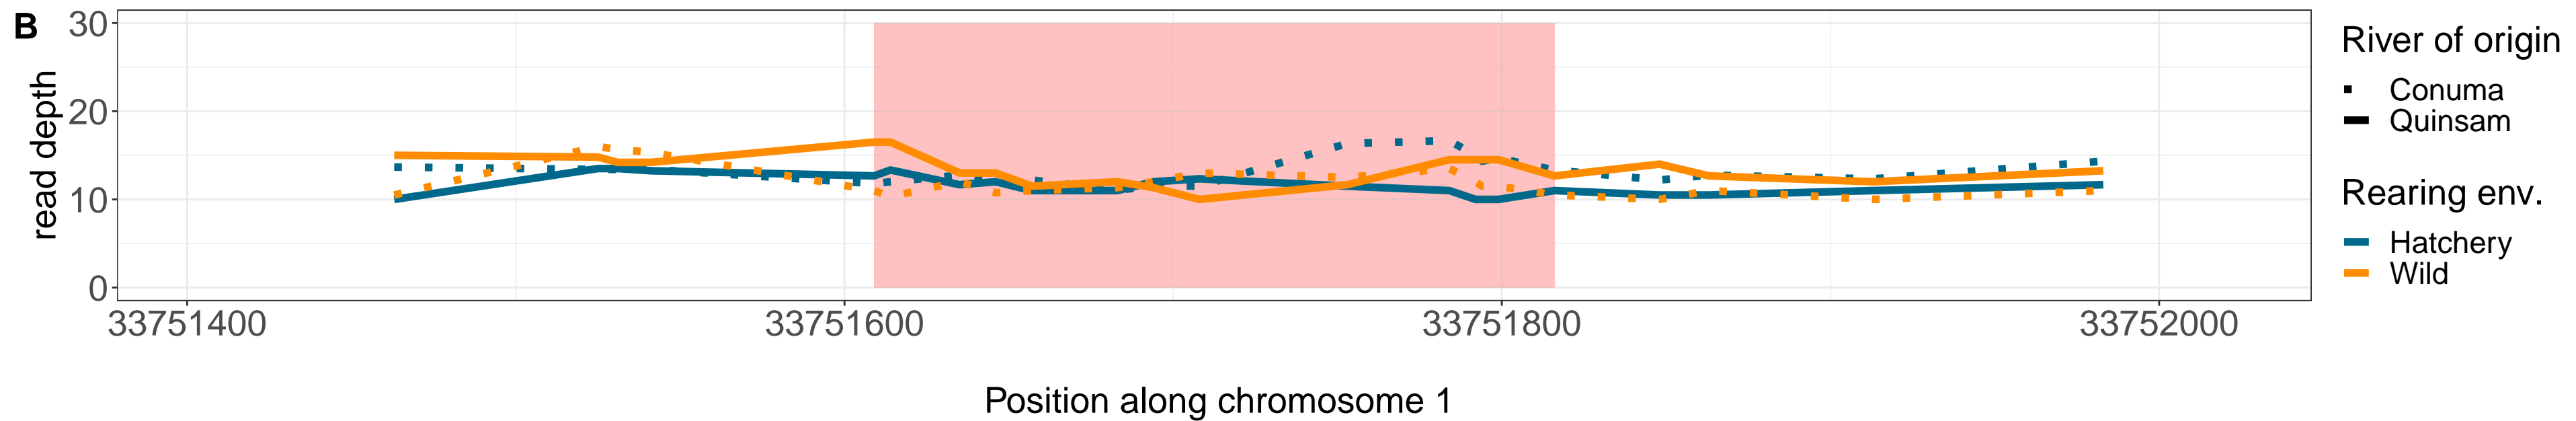

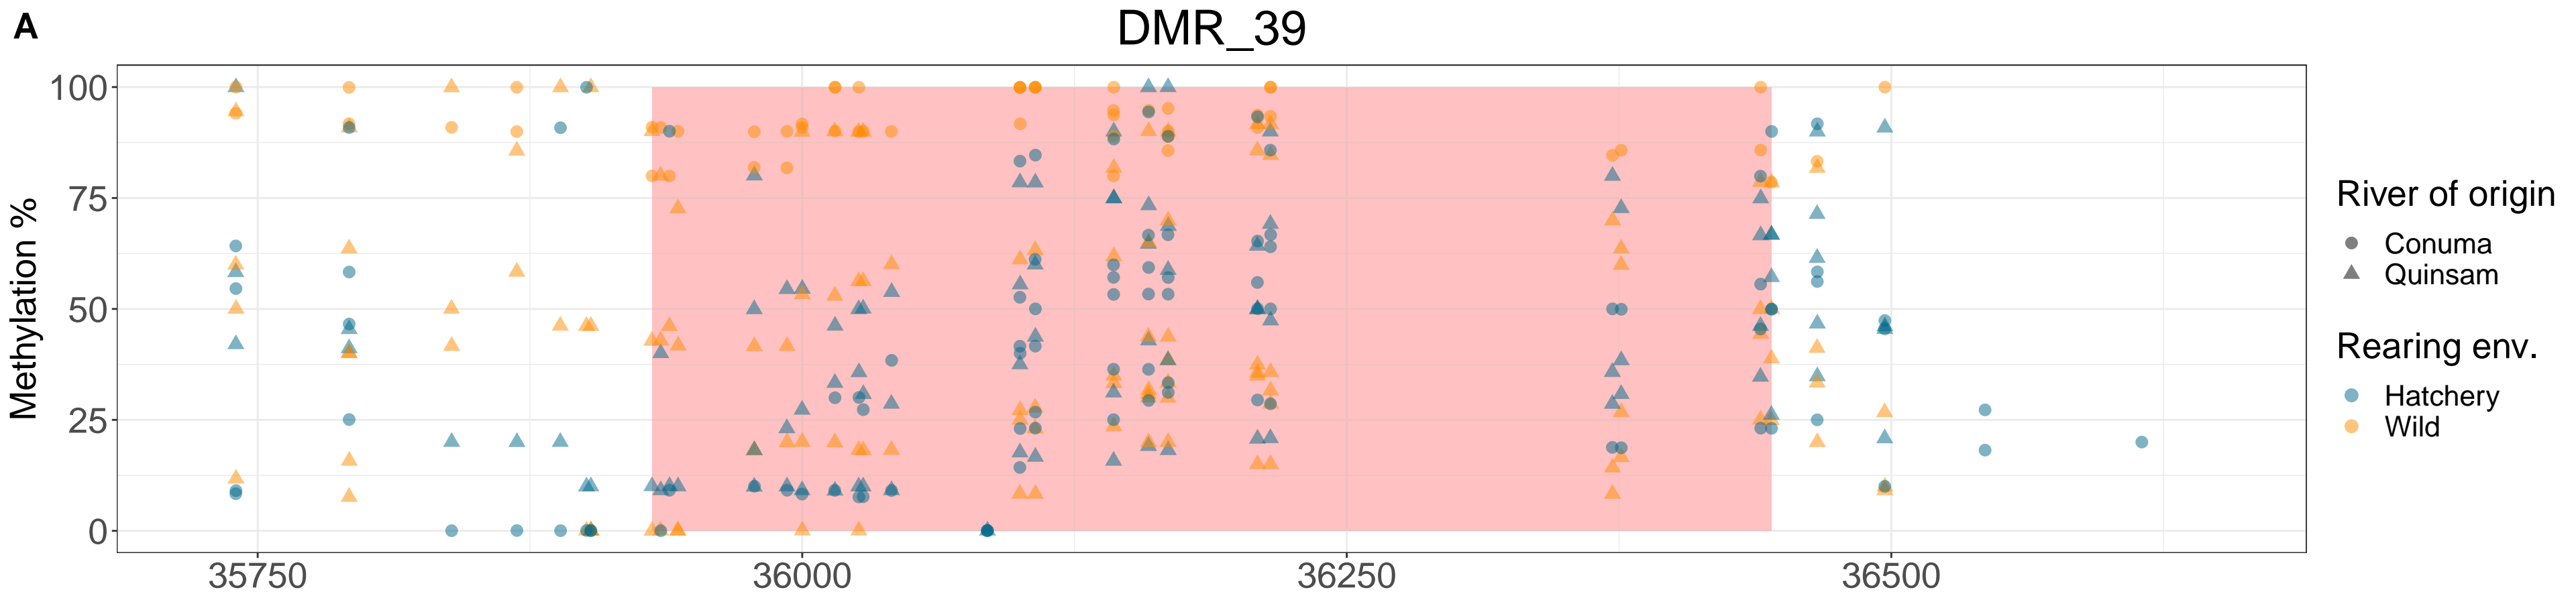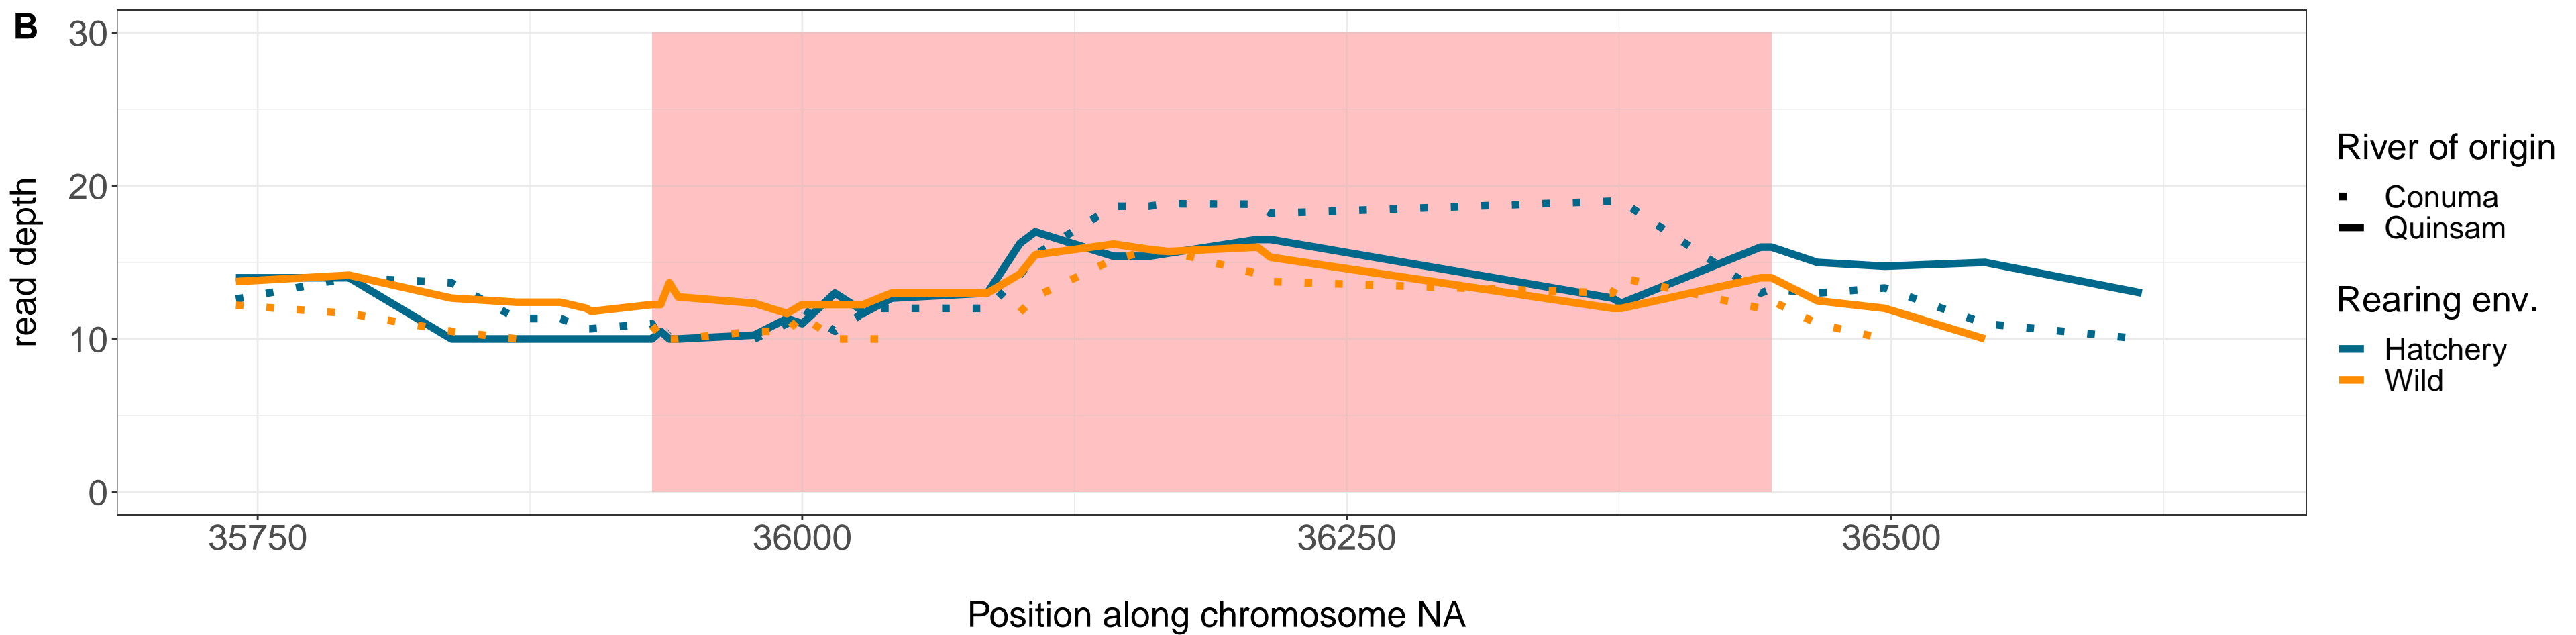

# DMR\_40

XM\_020483656.1

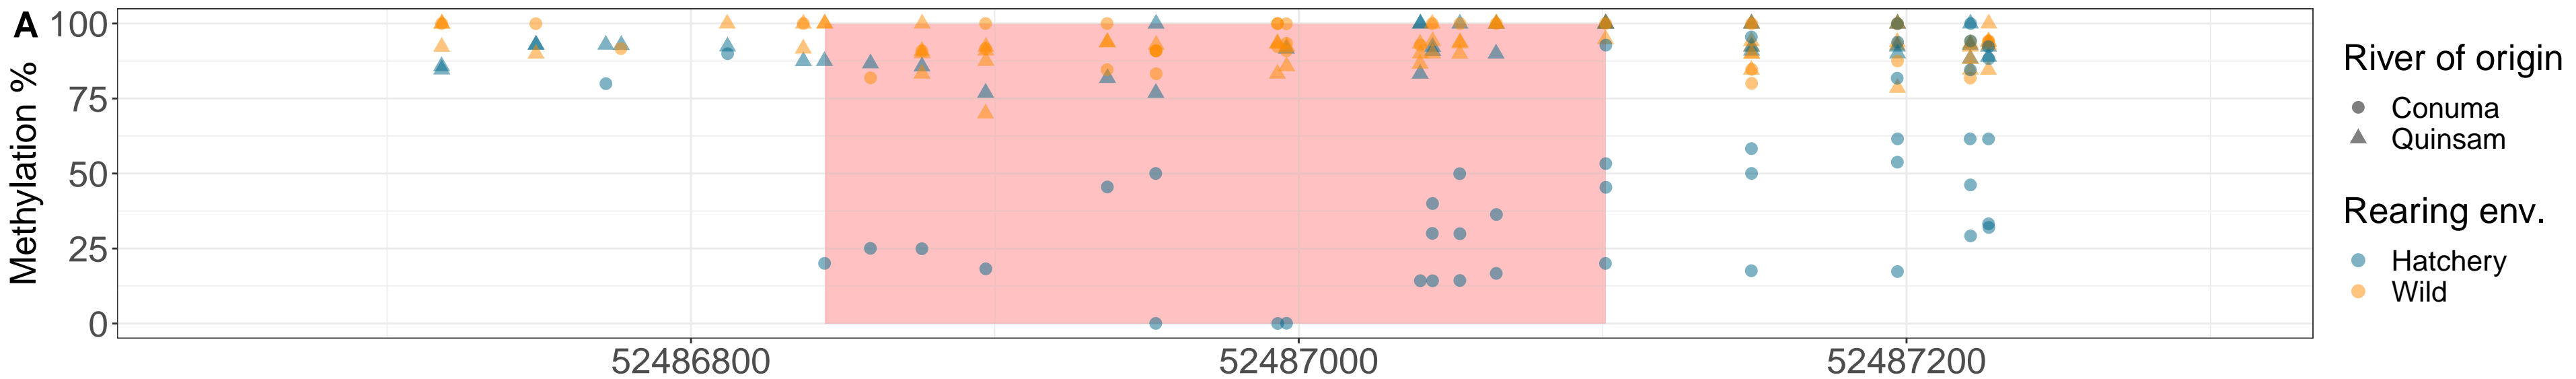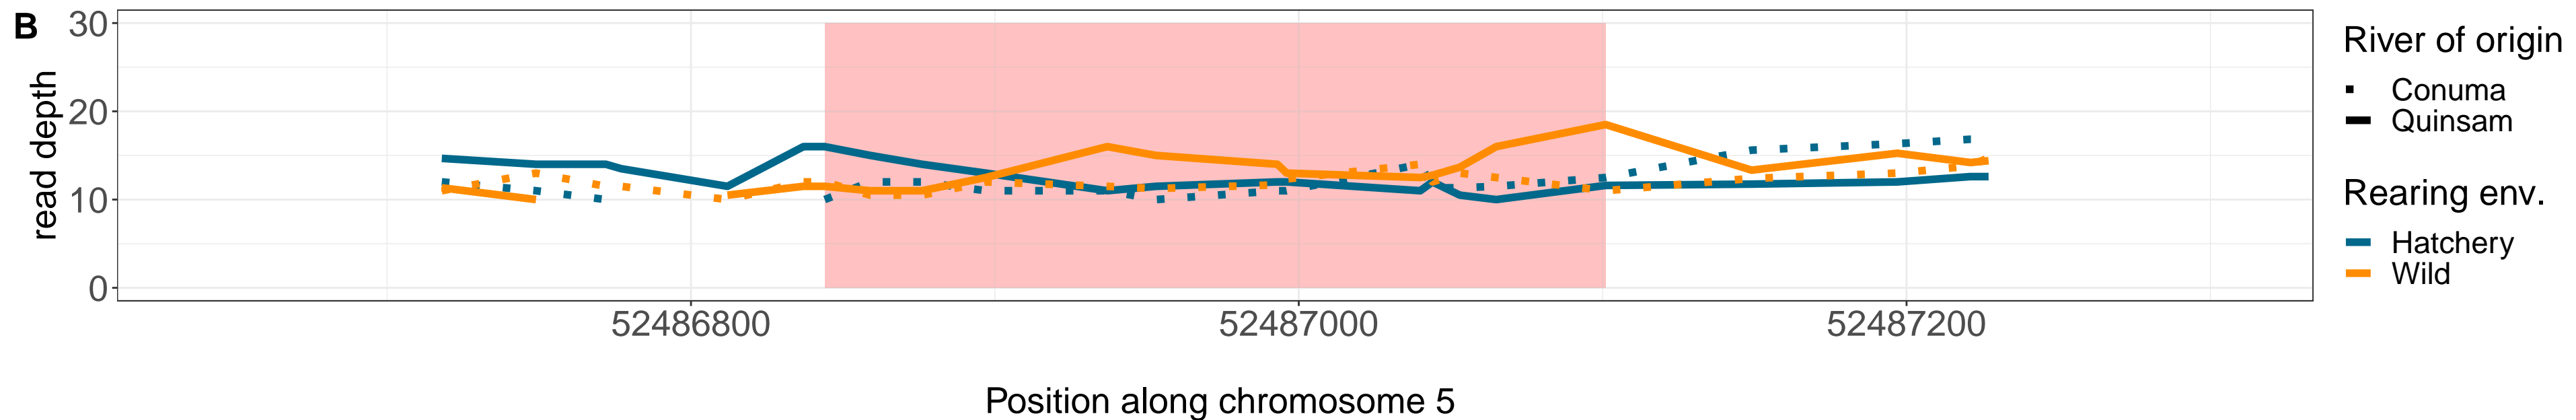



**A**

## DMR\_41

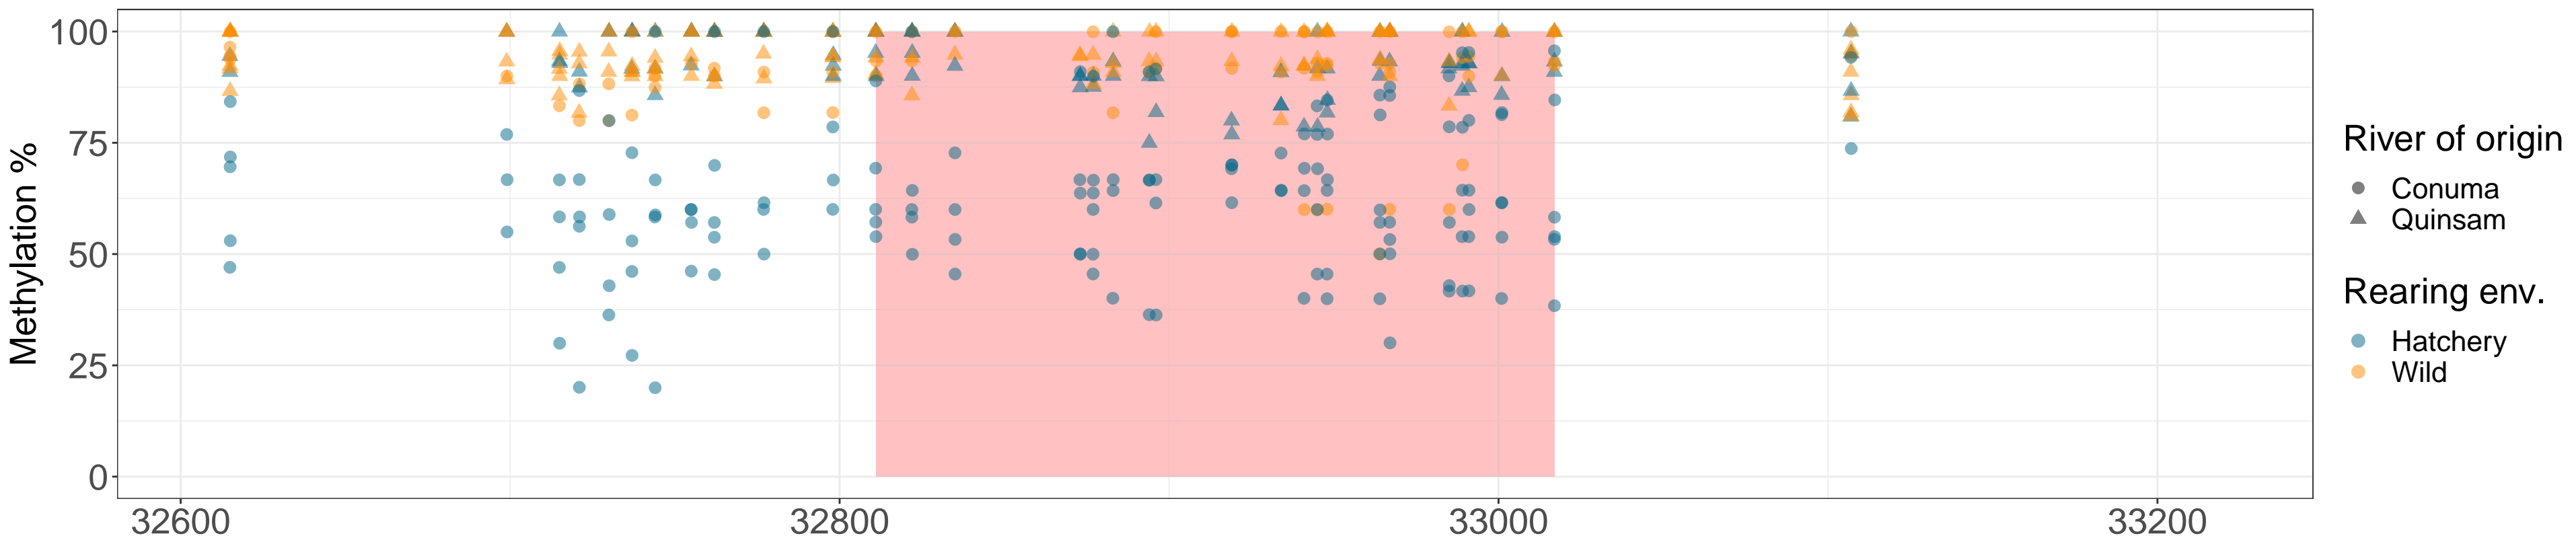**B**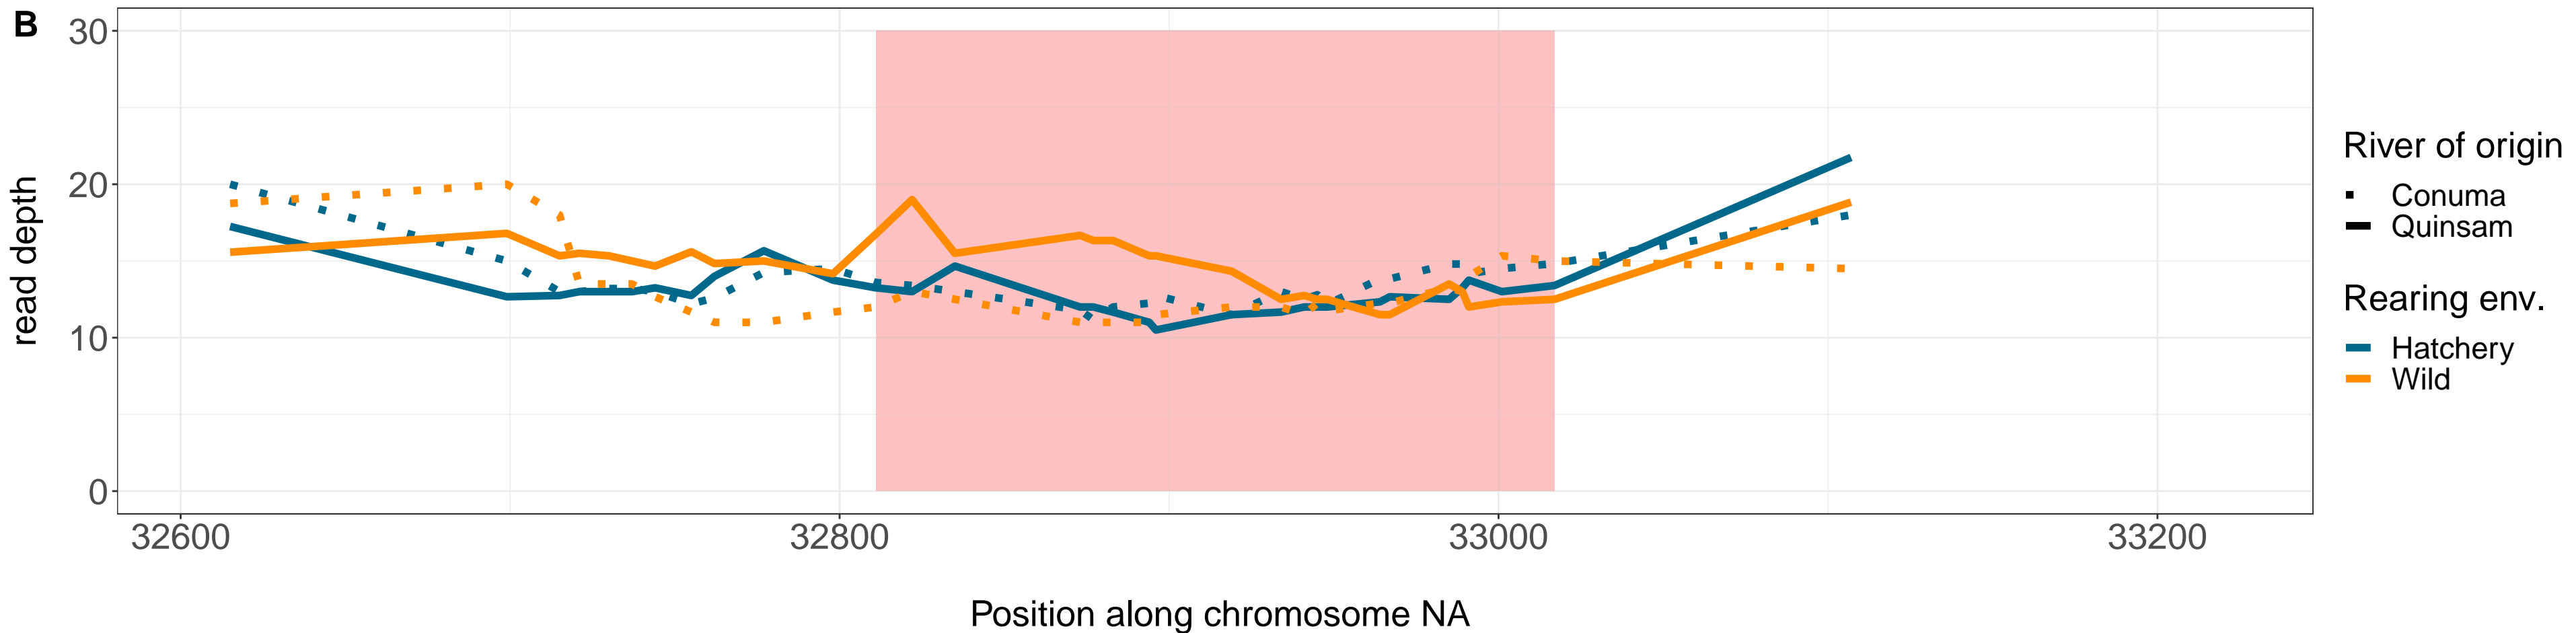

# DMR\_42

XM\_020480354.1

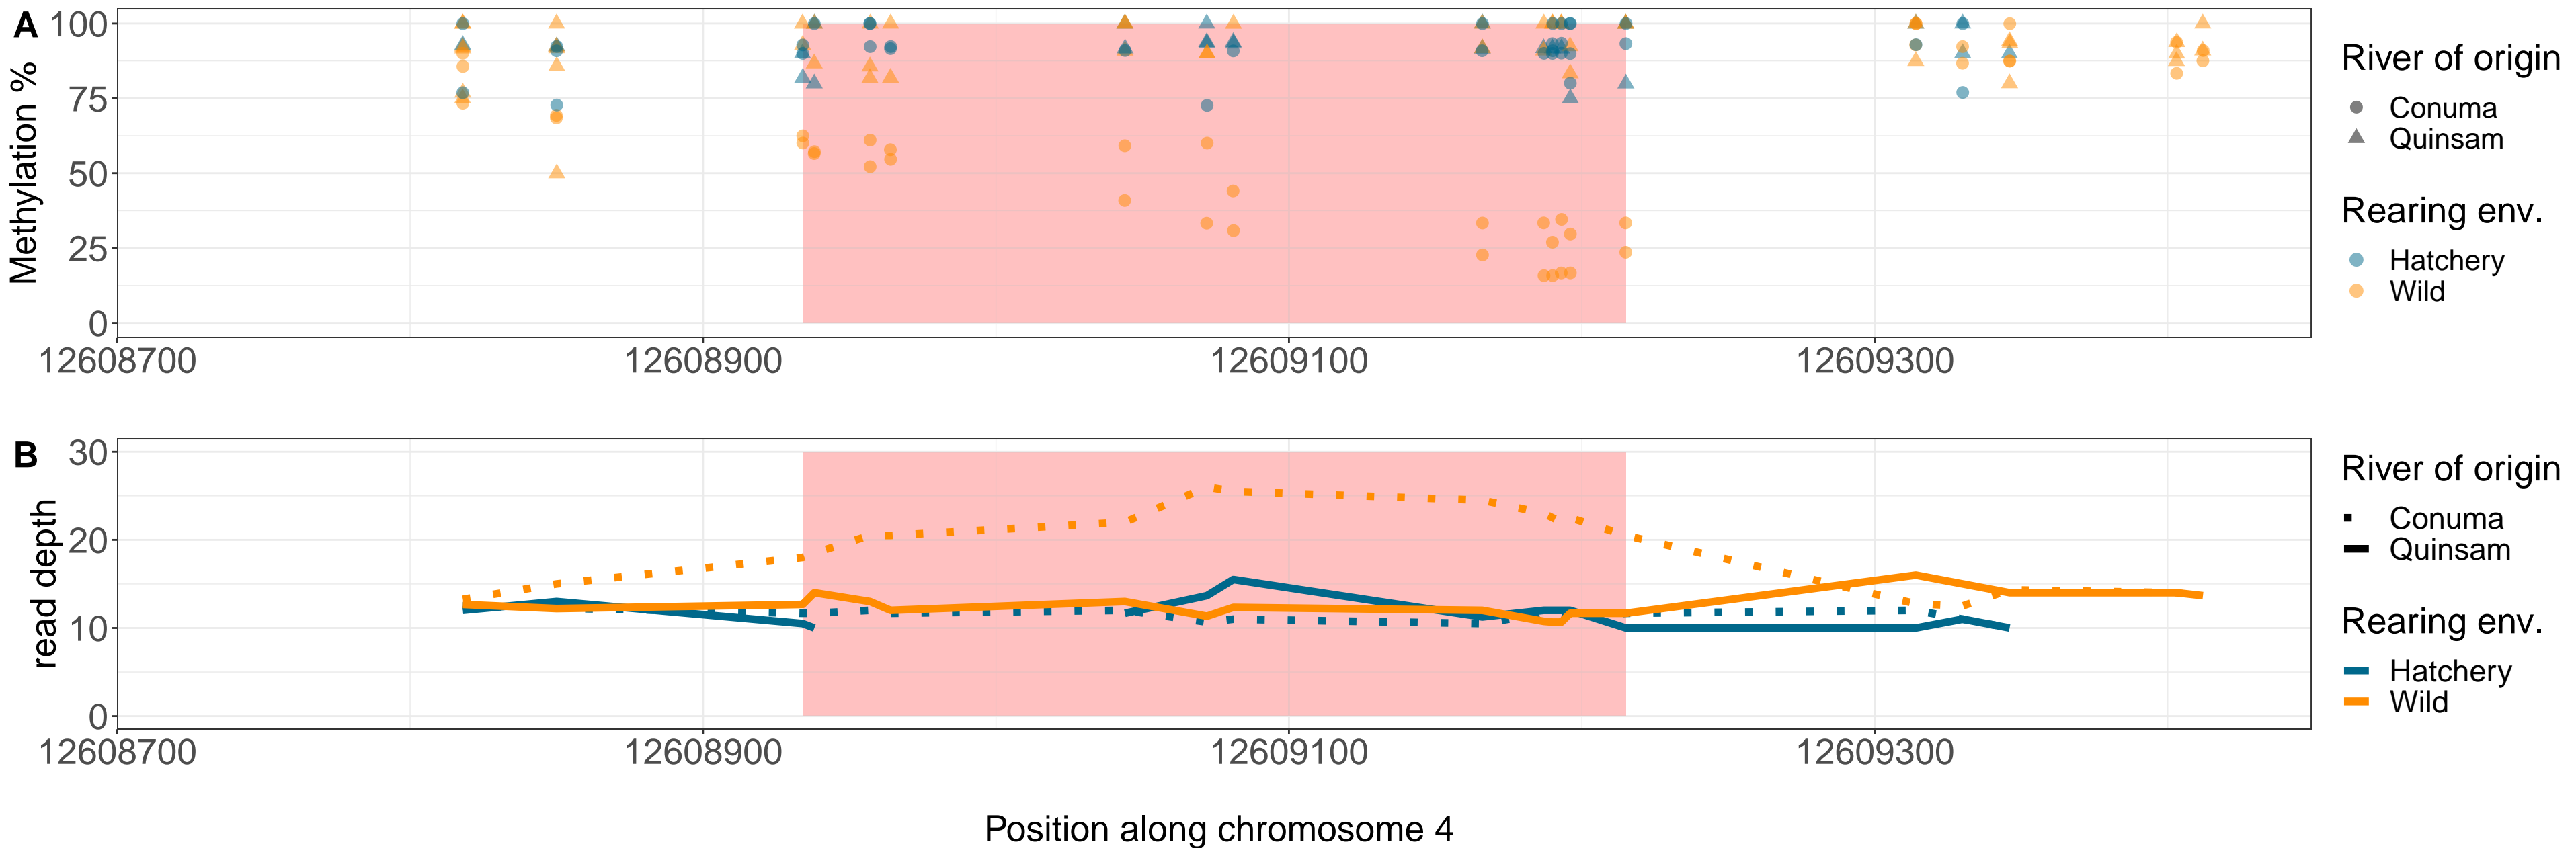

**A**

## DMR\_43

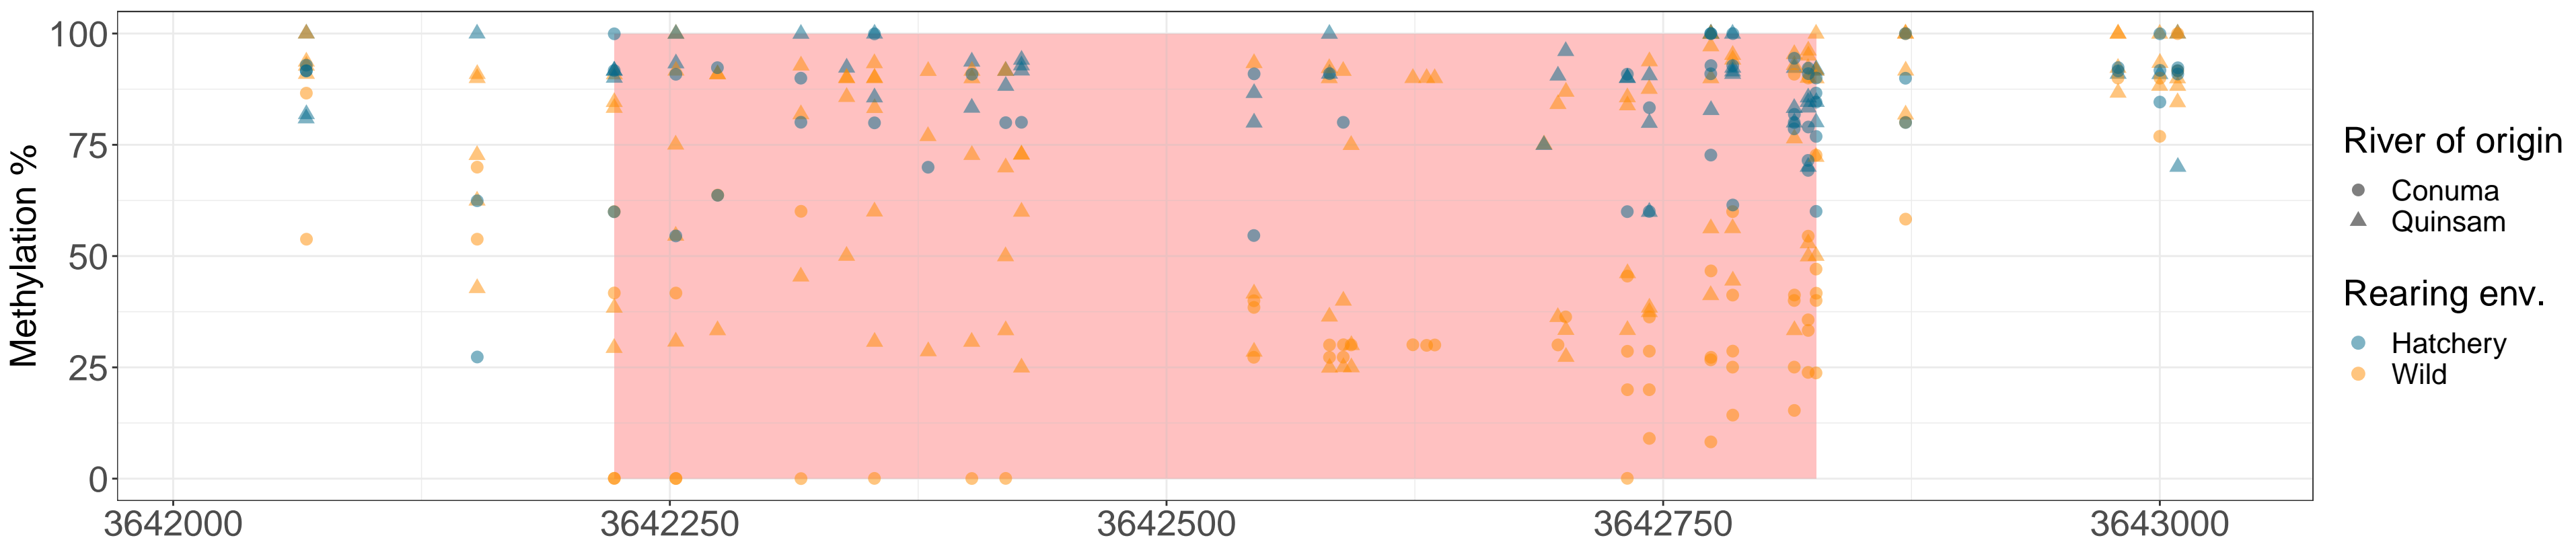**B**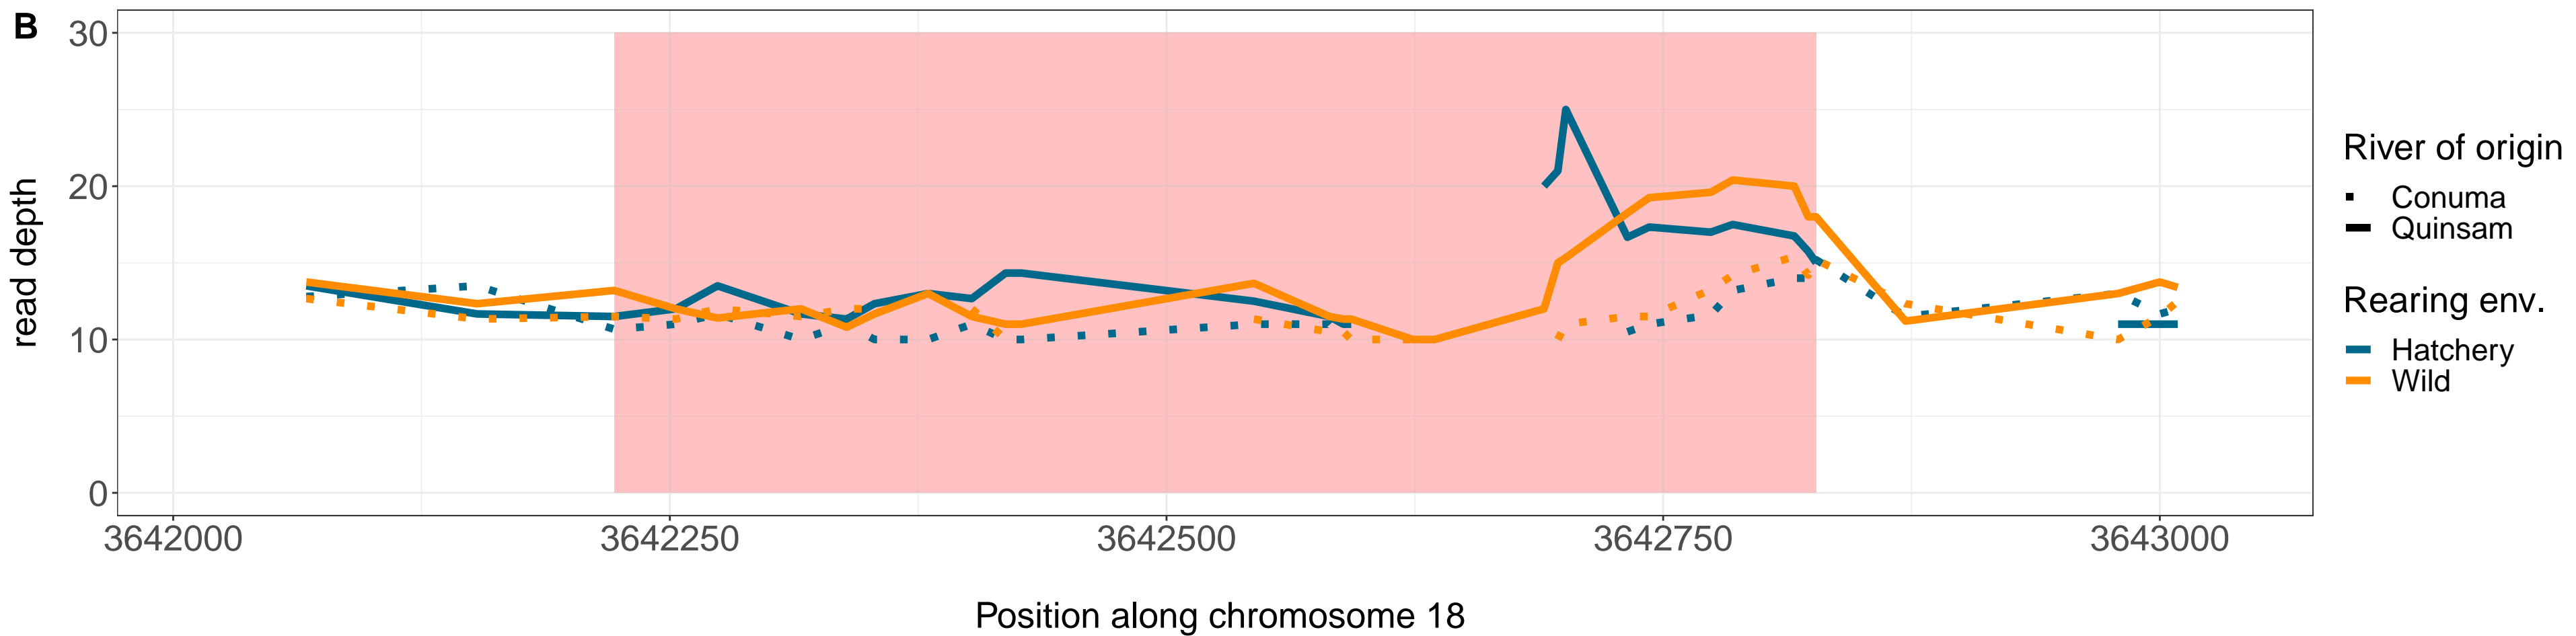

**A**

## DMR\_44

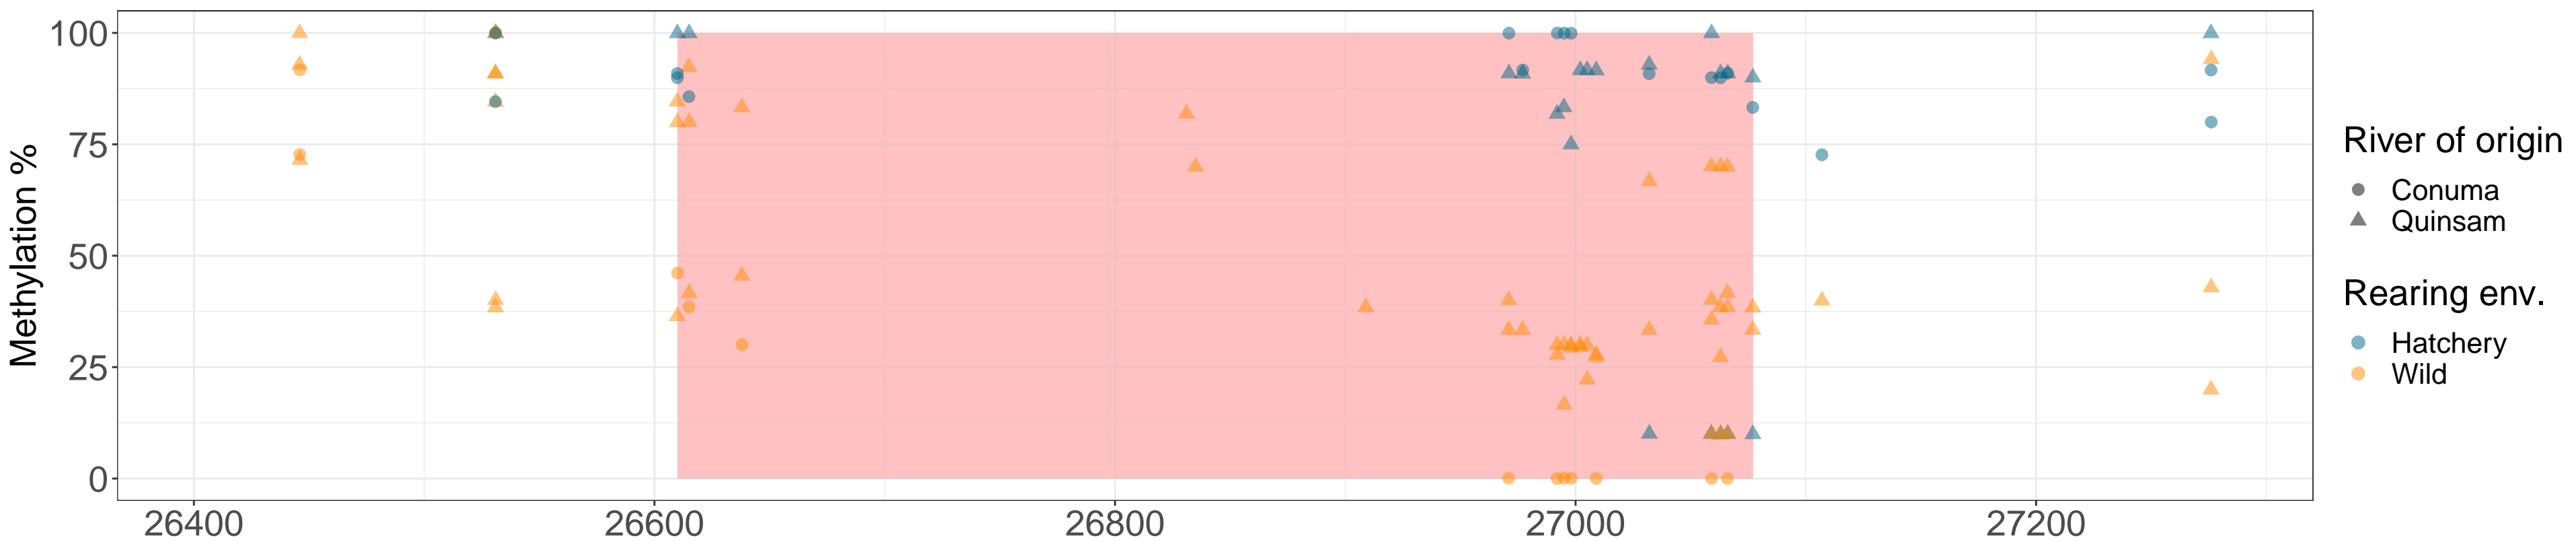**B**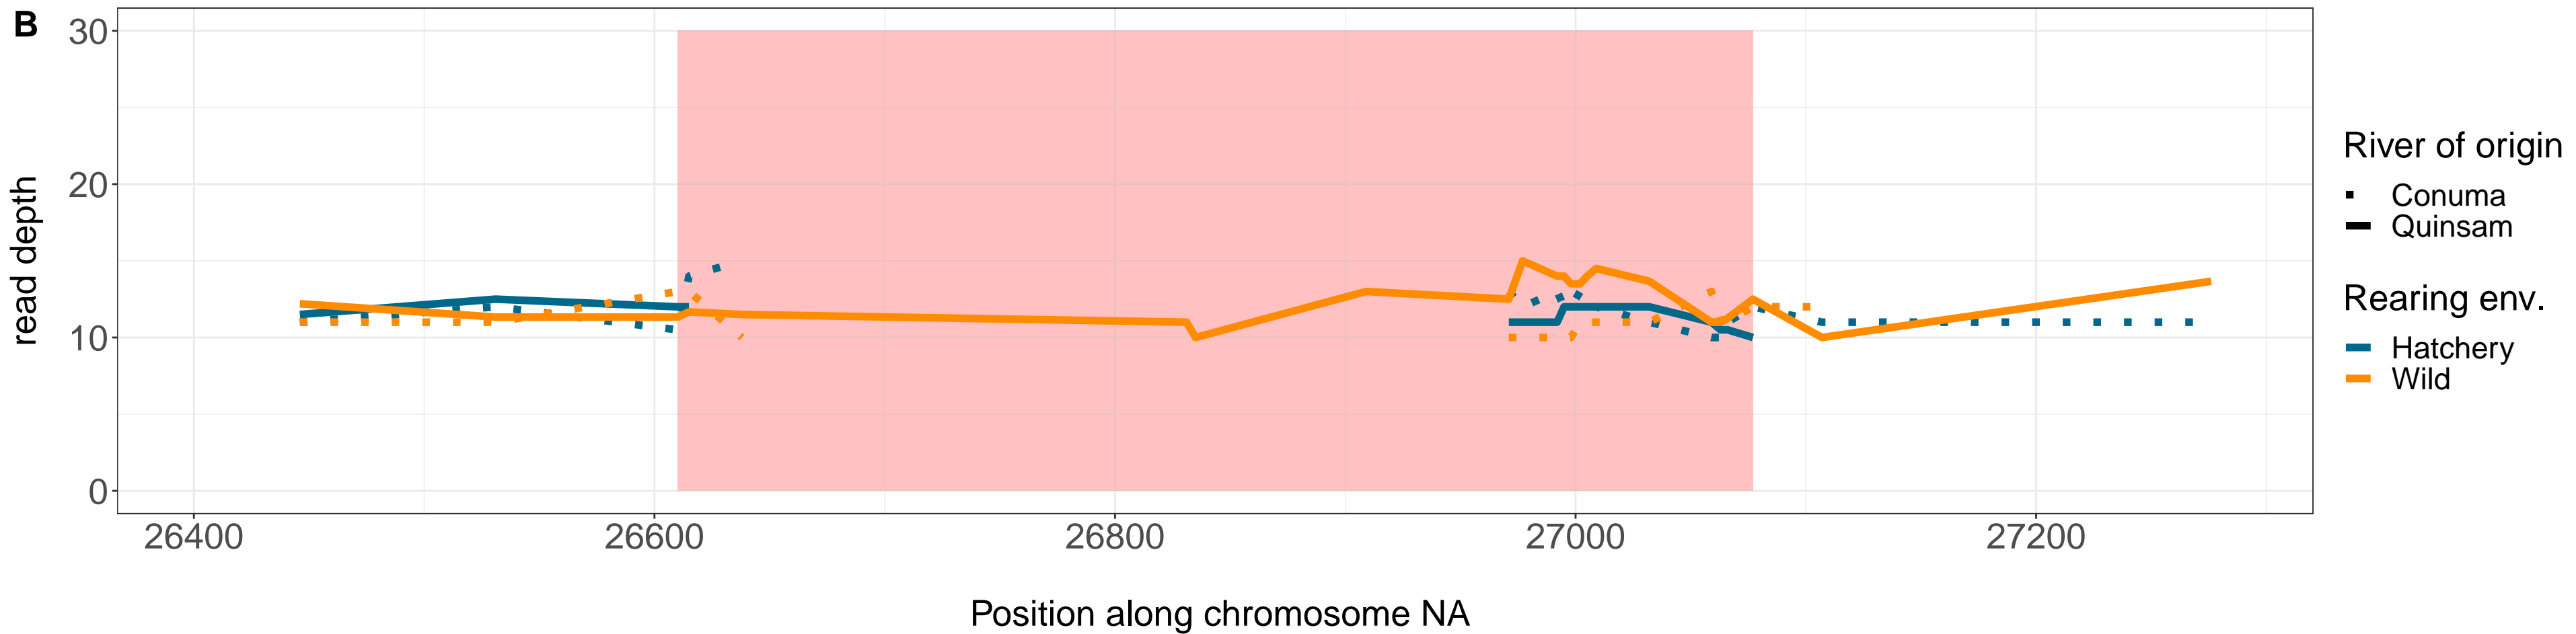

**A**

## DMR\_45

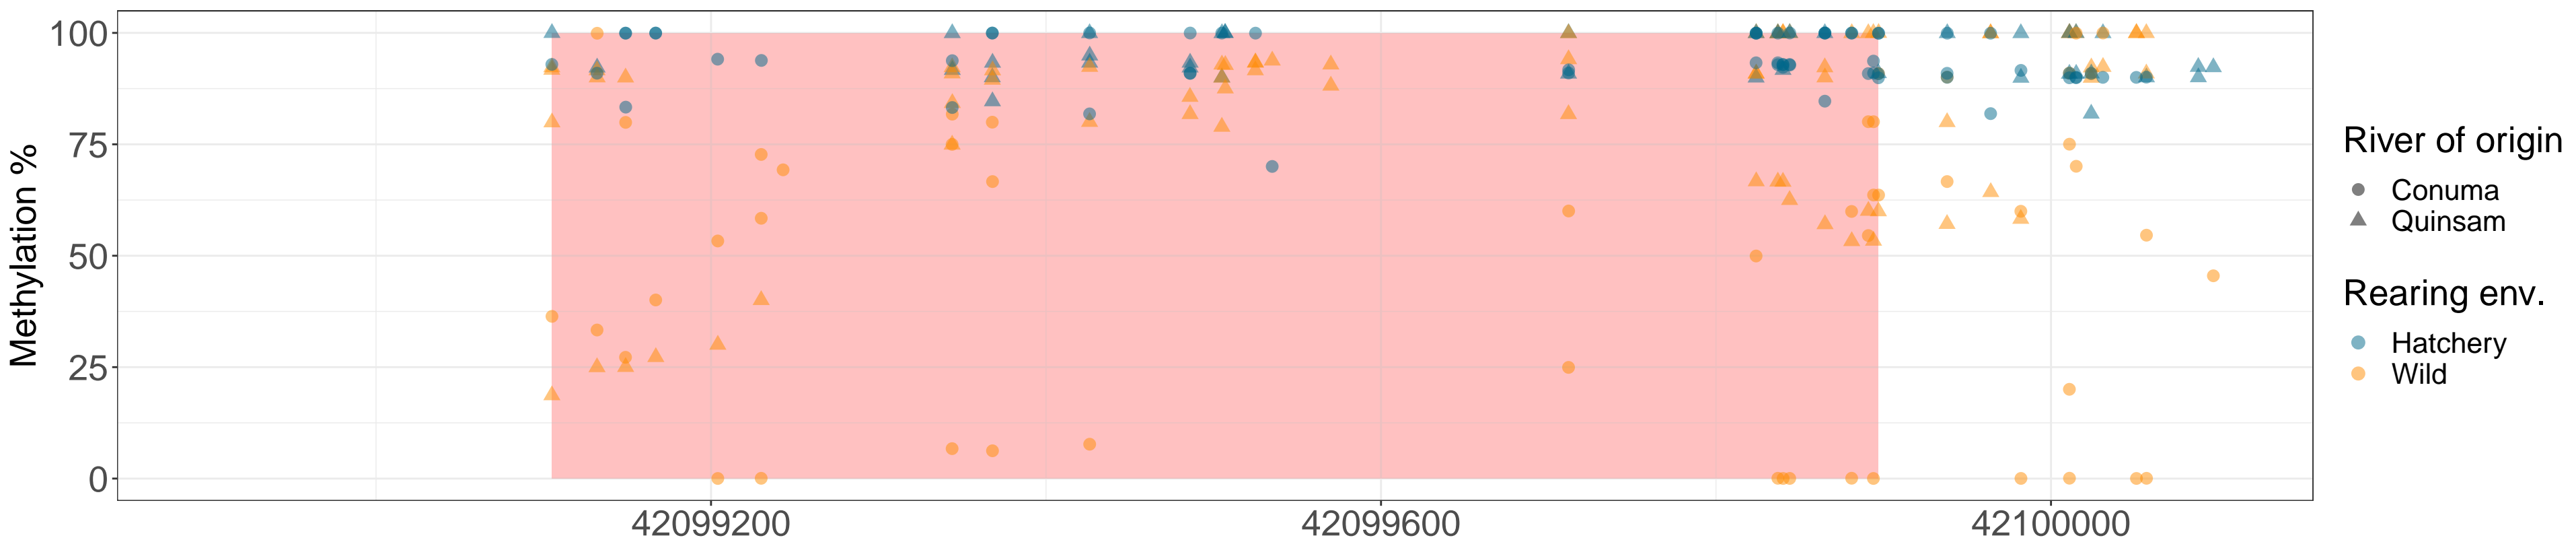**B**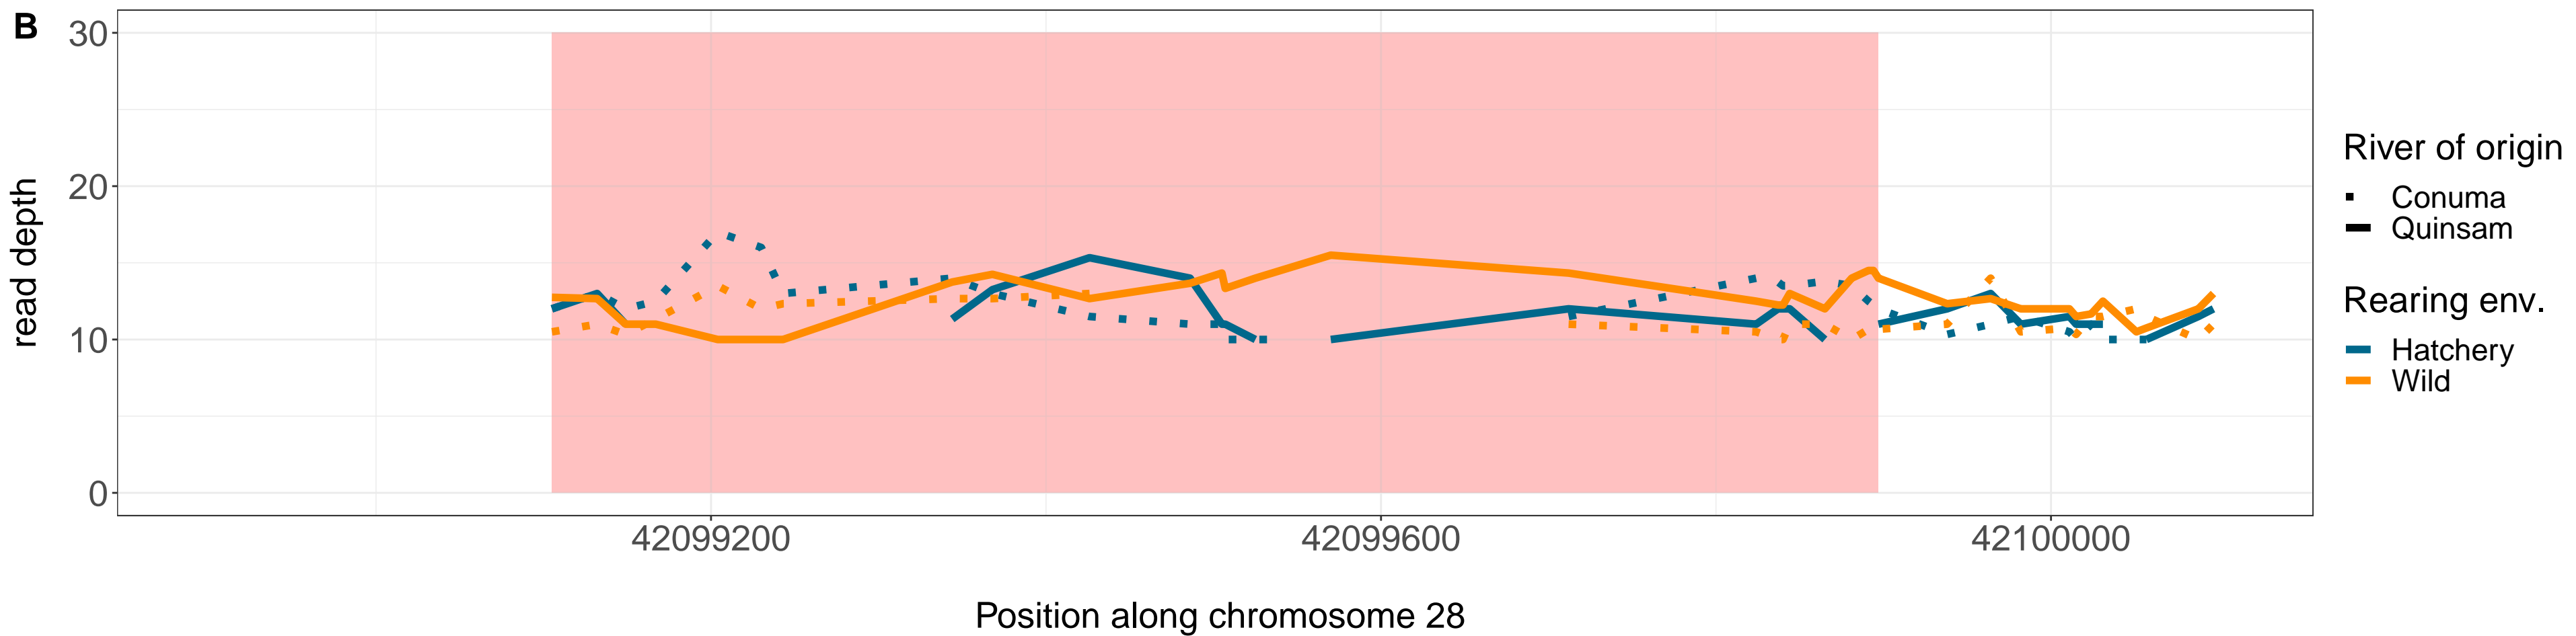

**A**

## DMR\_46

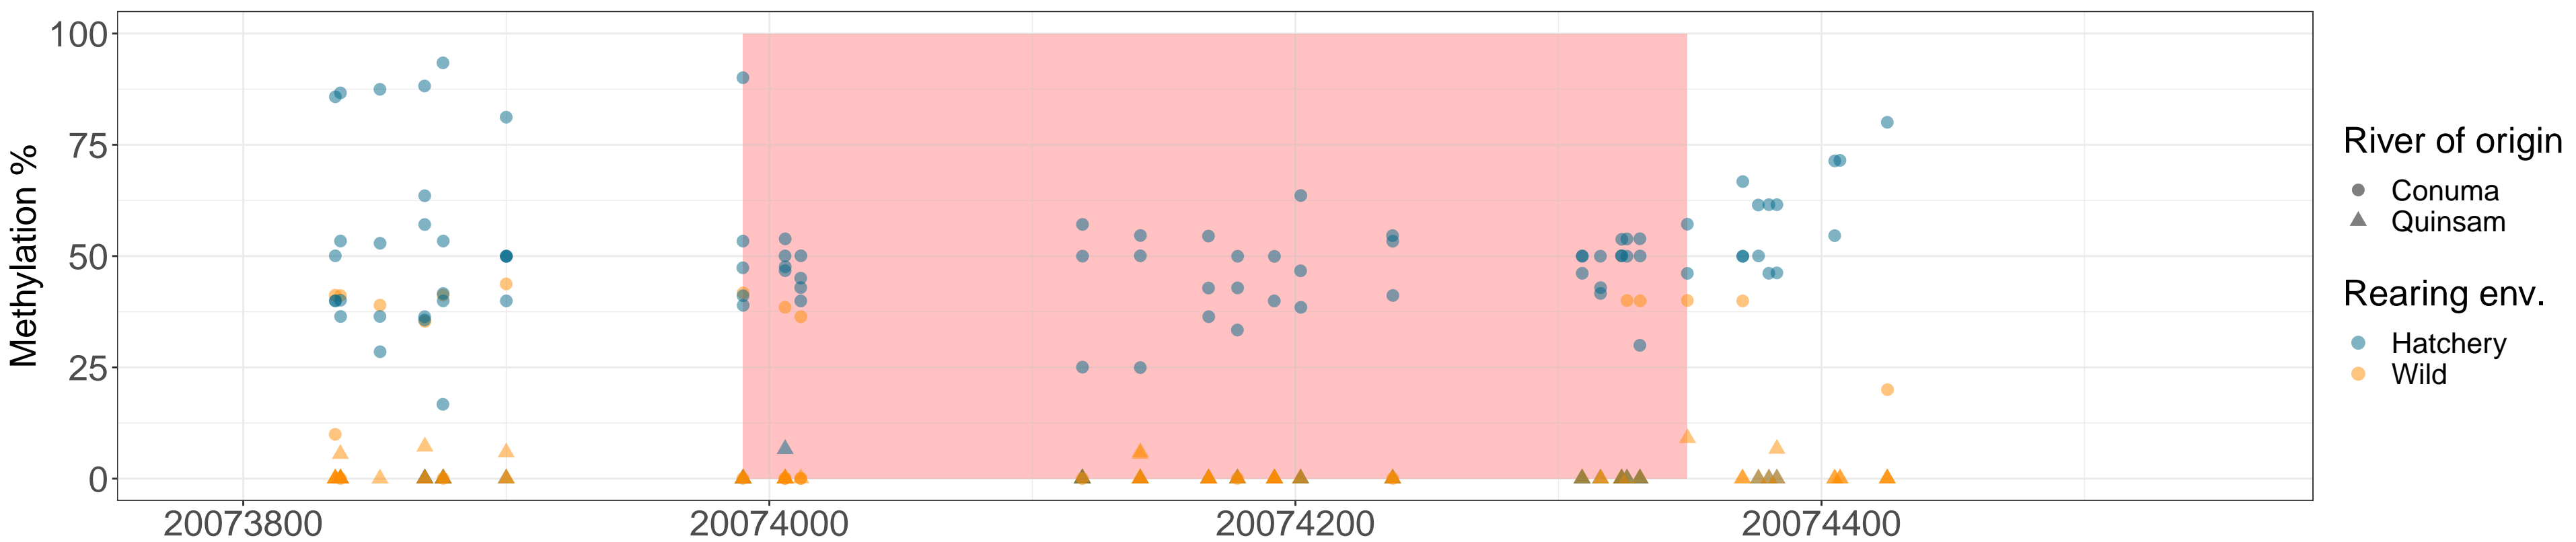**B**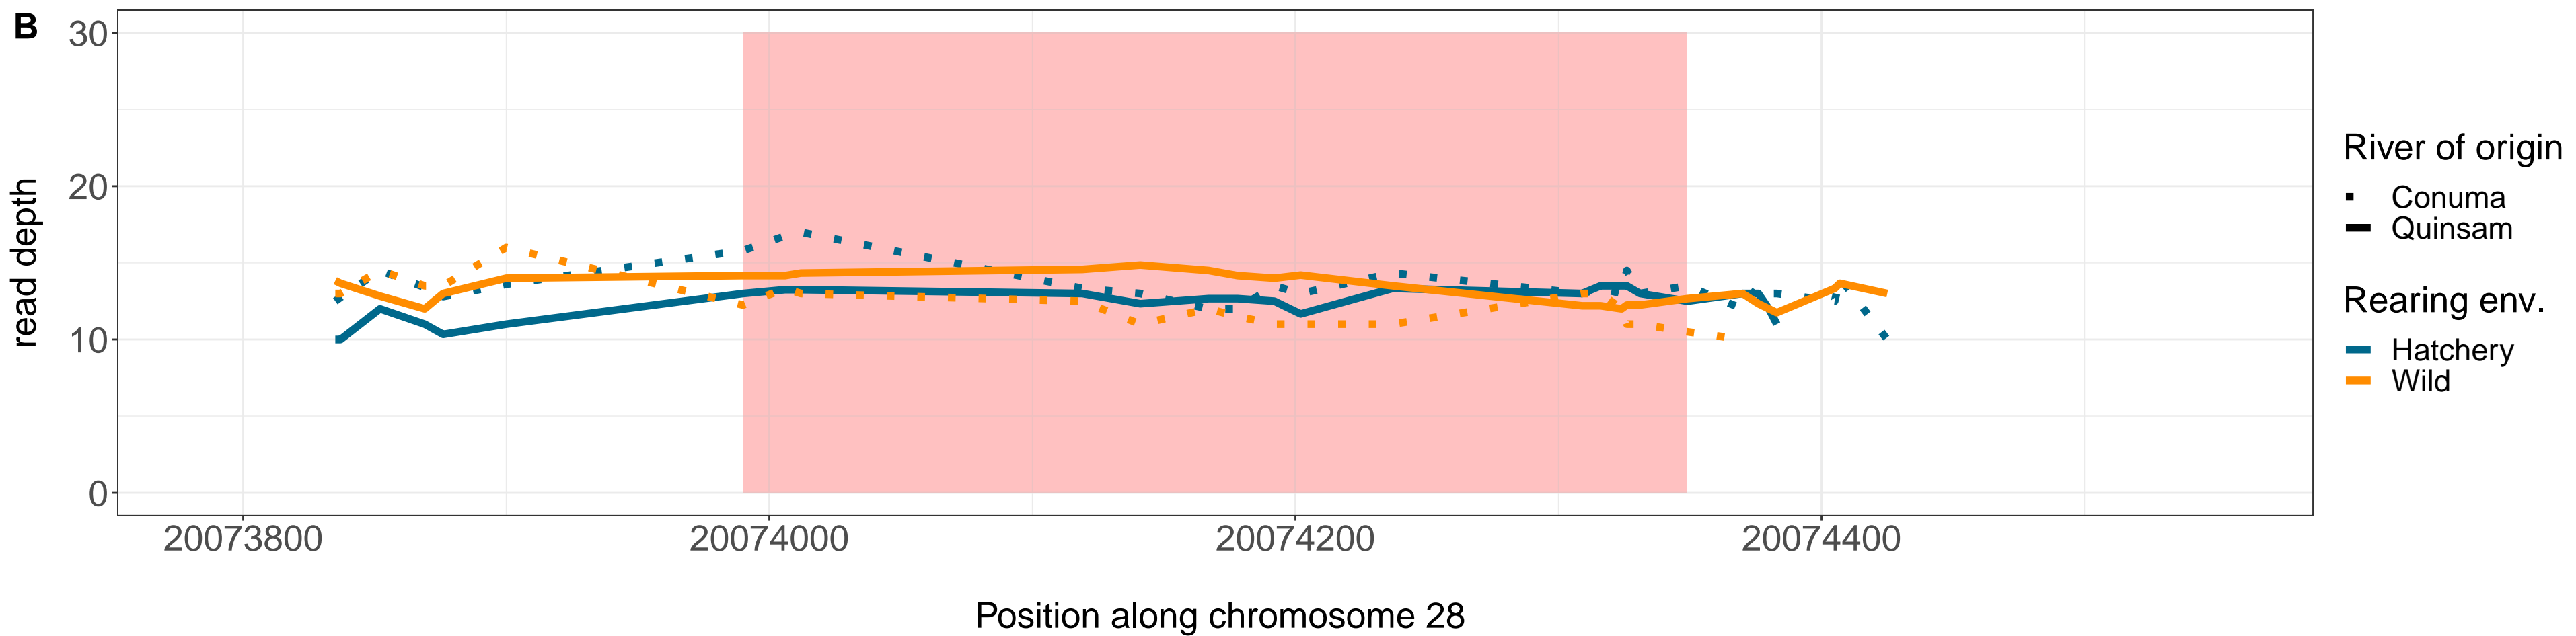

**A**

DMR\_47

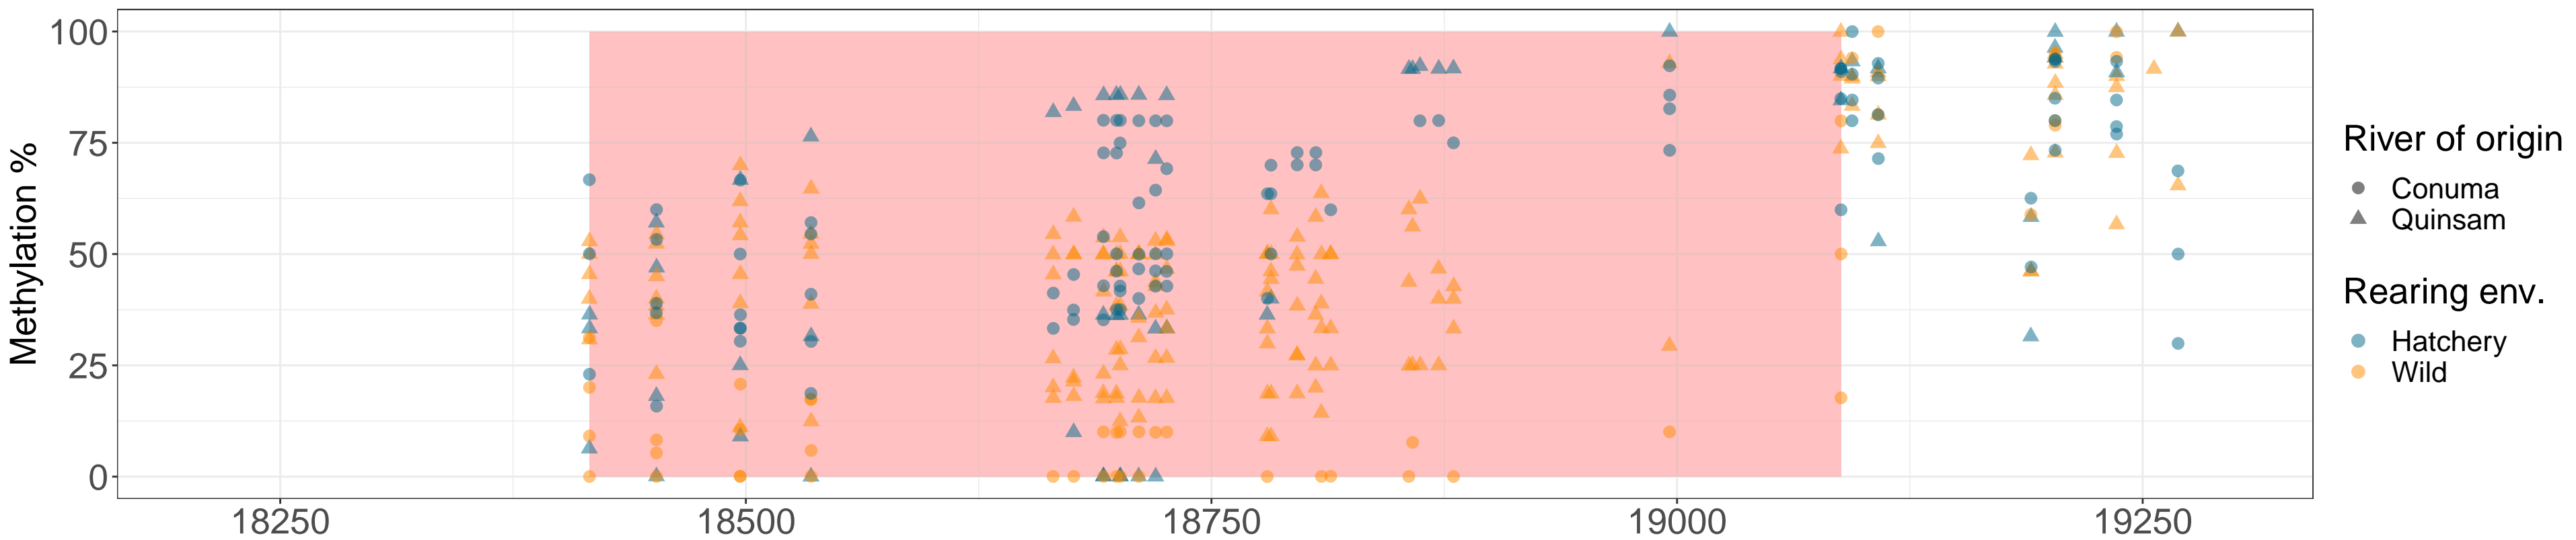**B**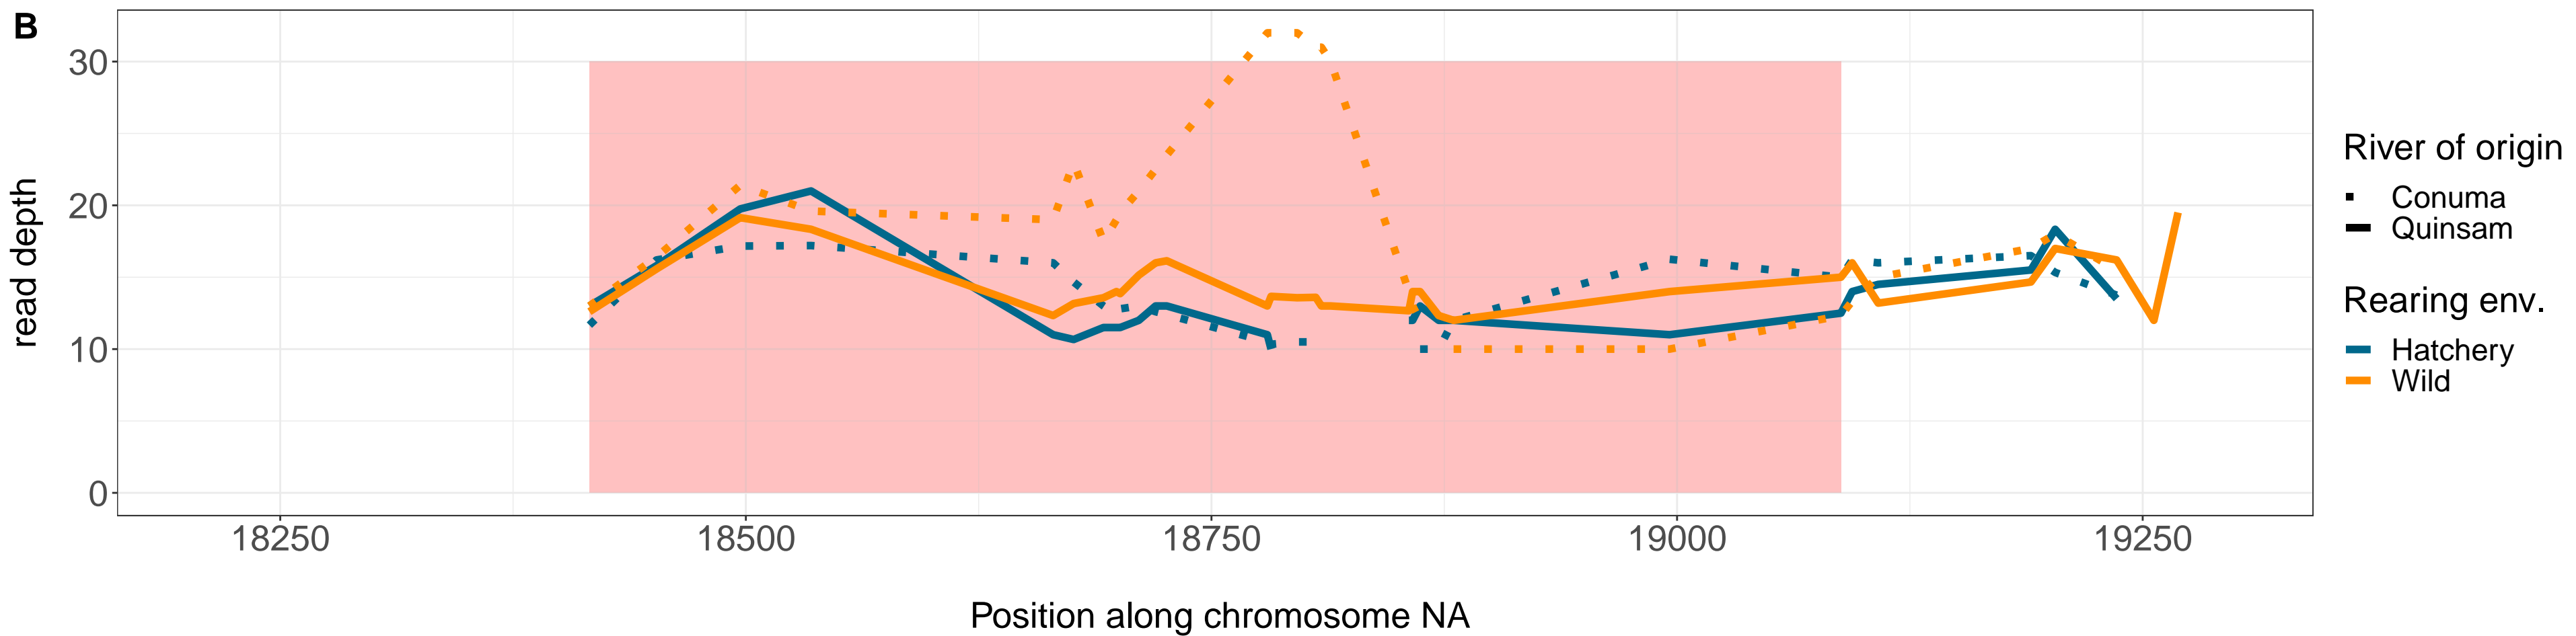

**A**

## DMR\_48

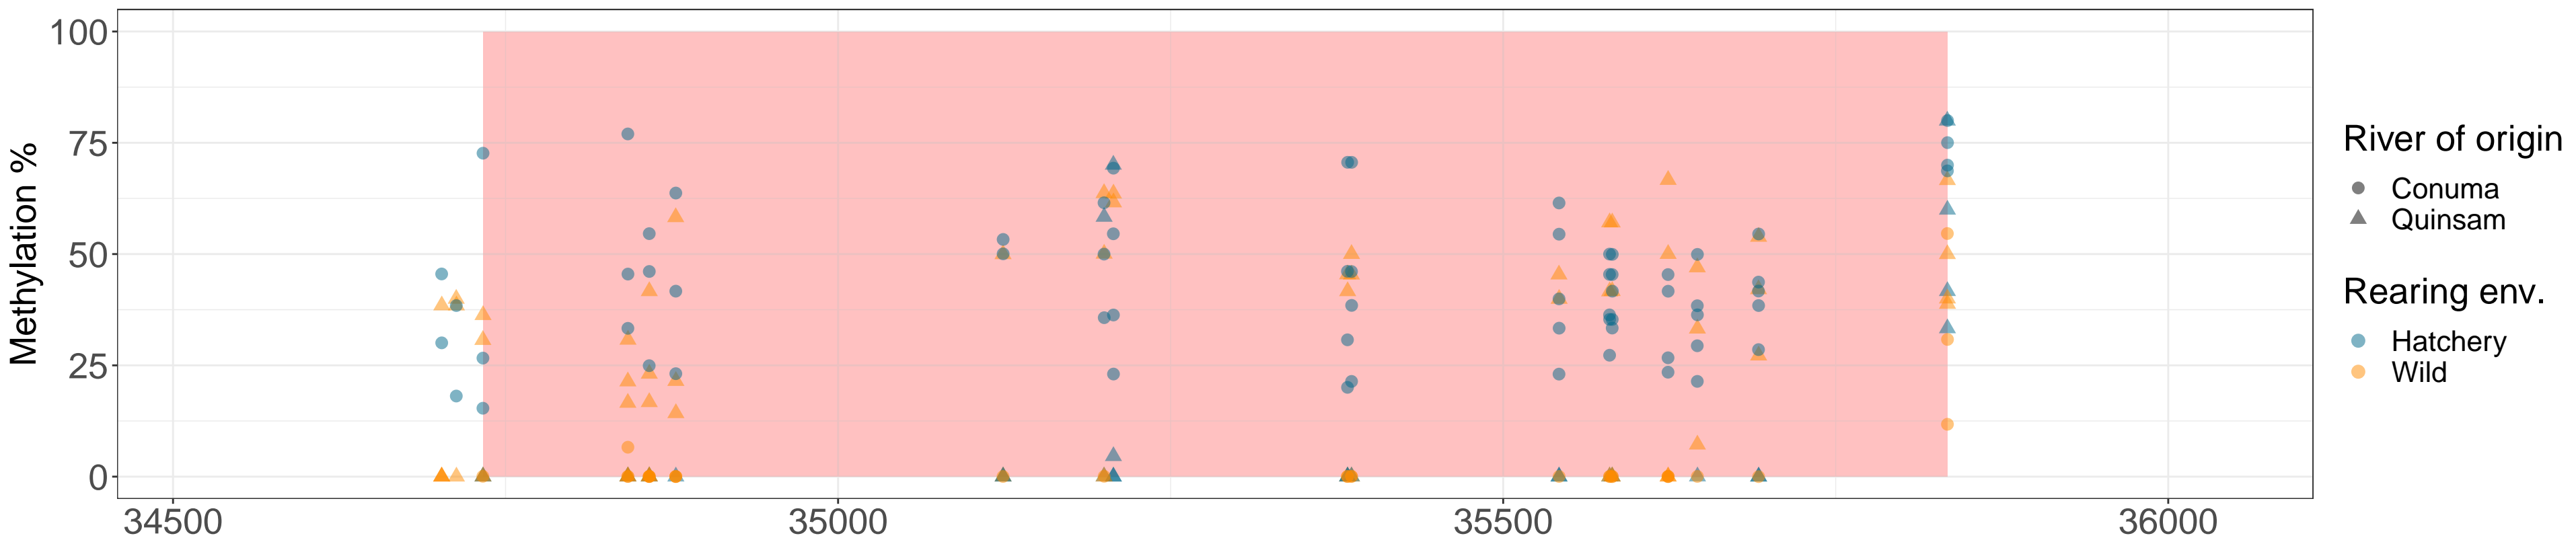**B**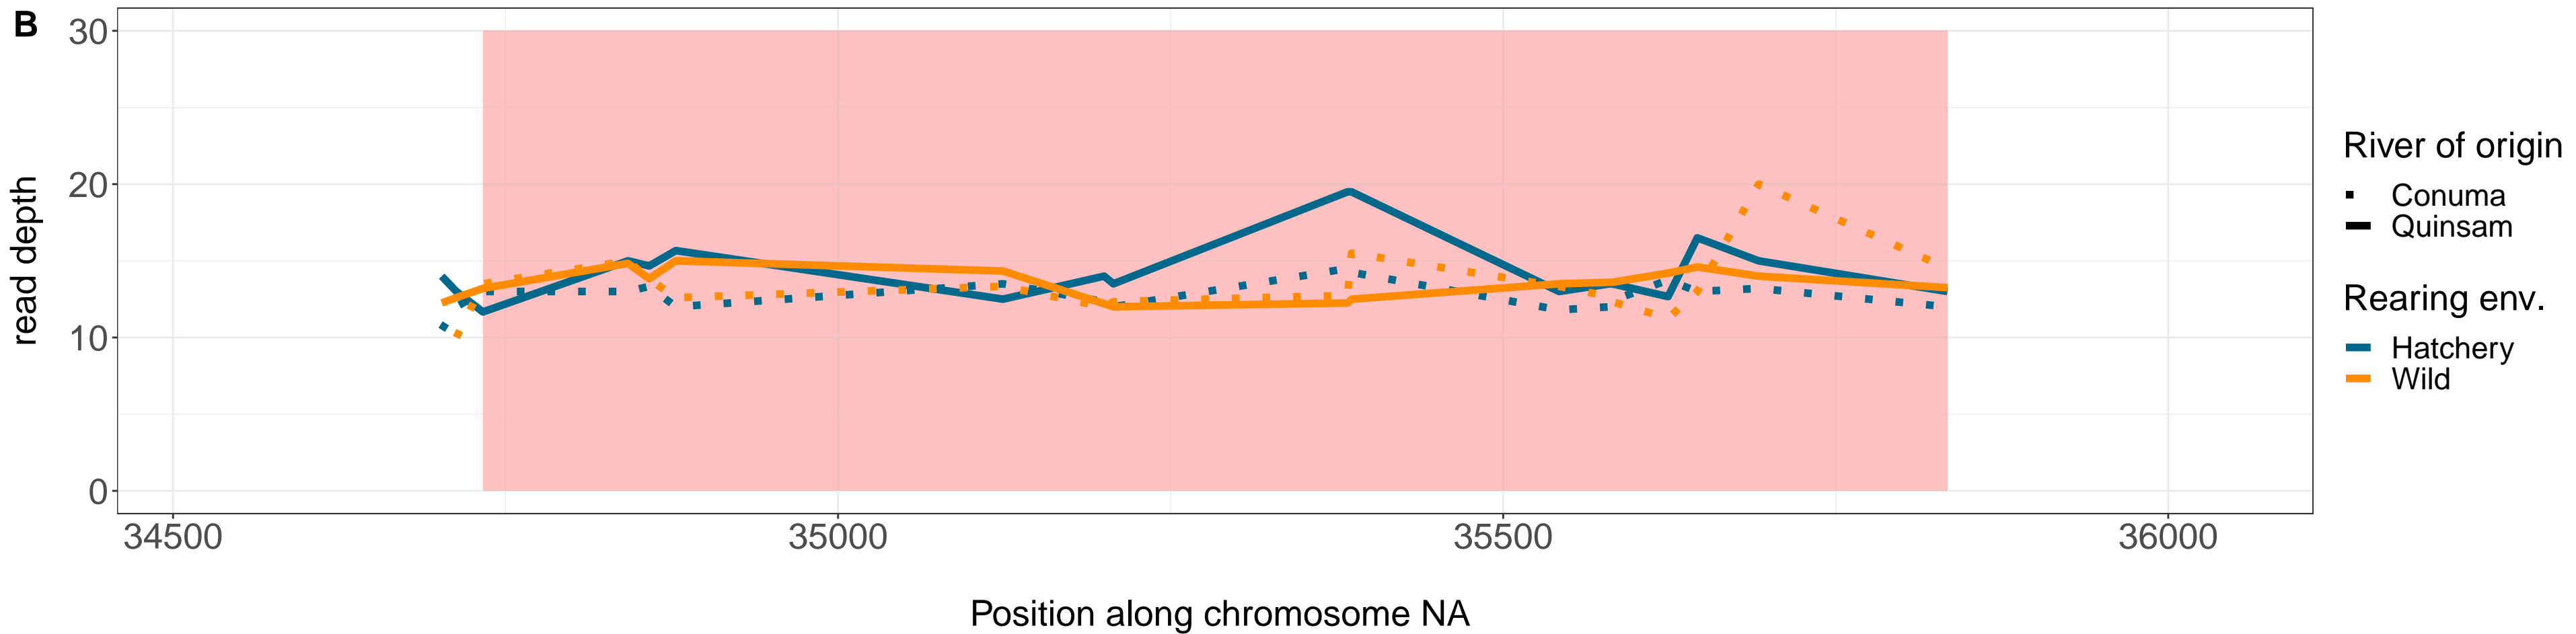



**A**

## DMR\_49

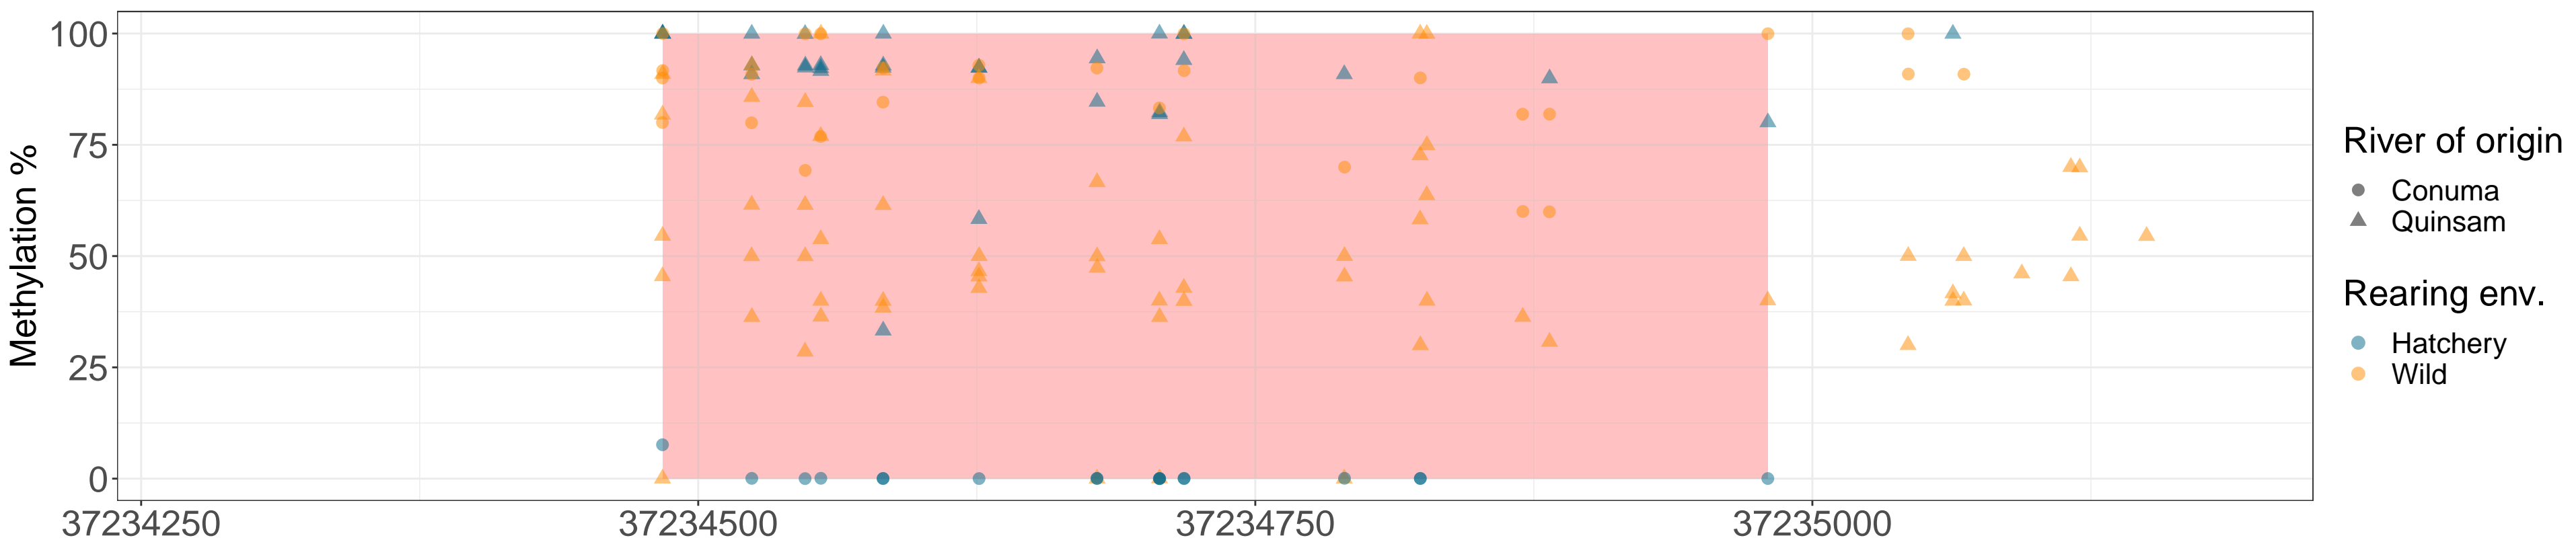**B**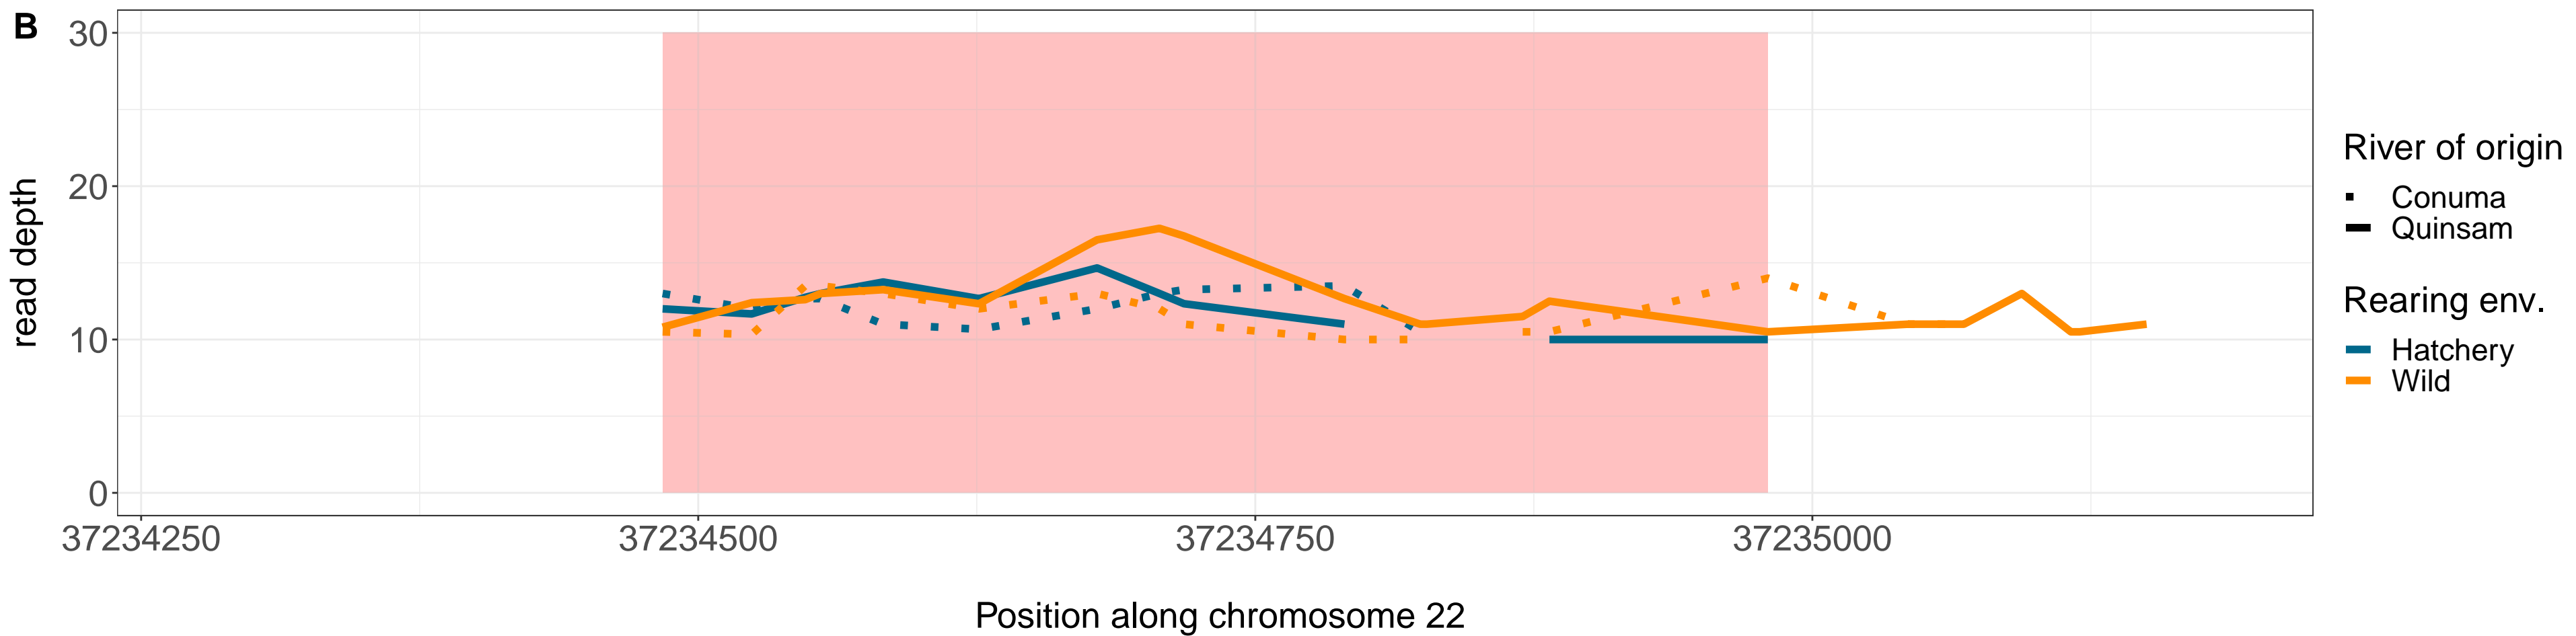

**A**

## DMR\_50

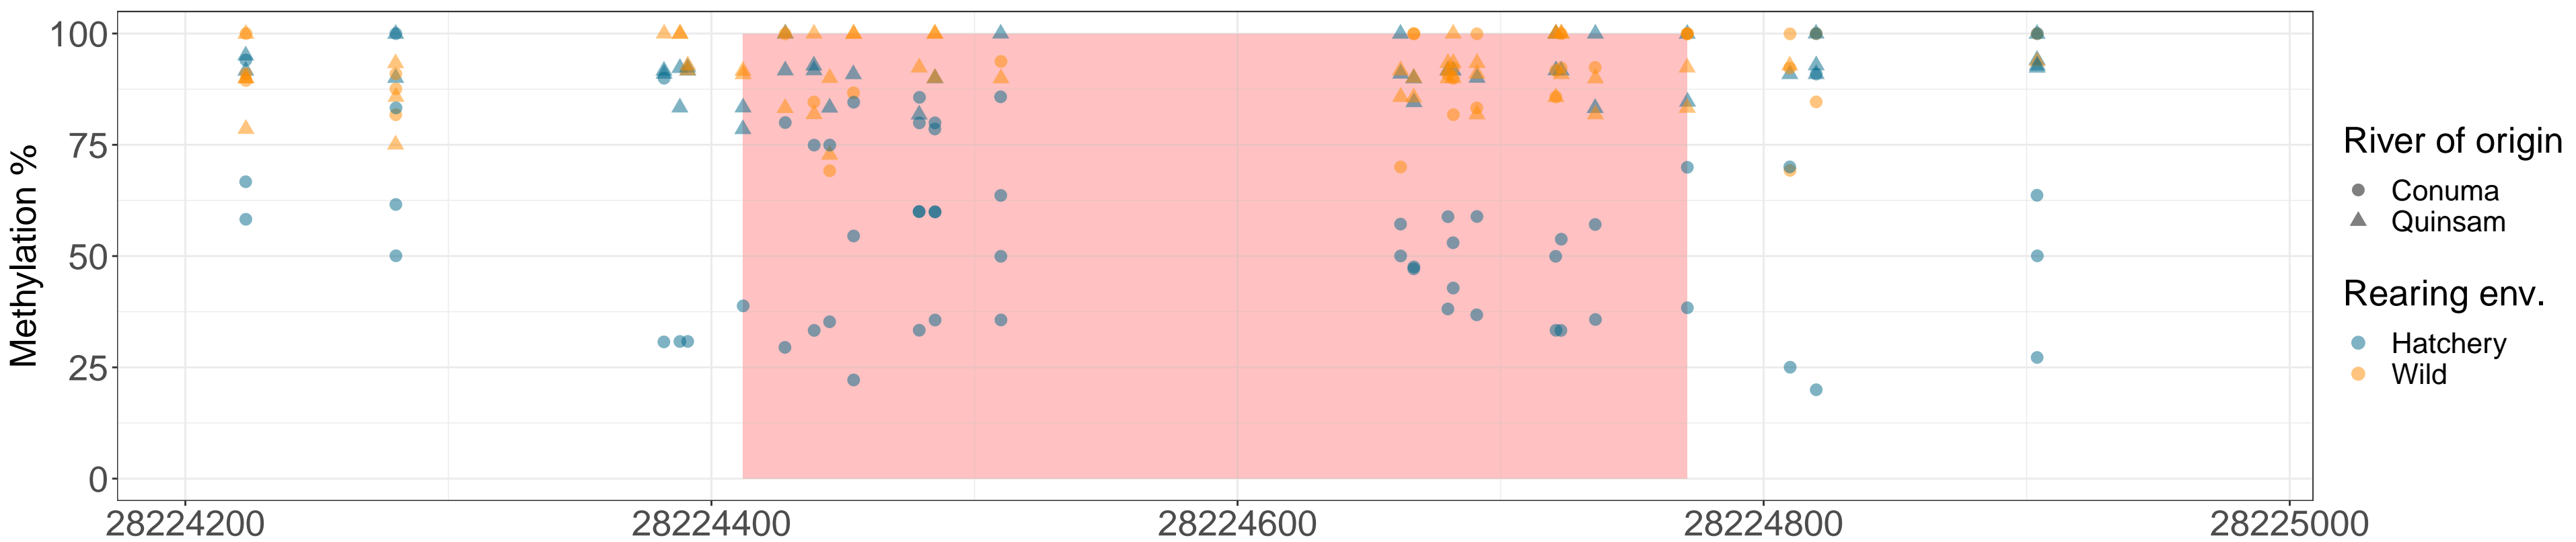**B**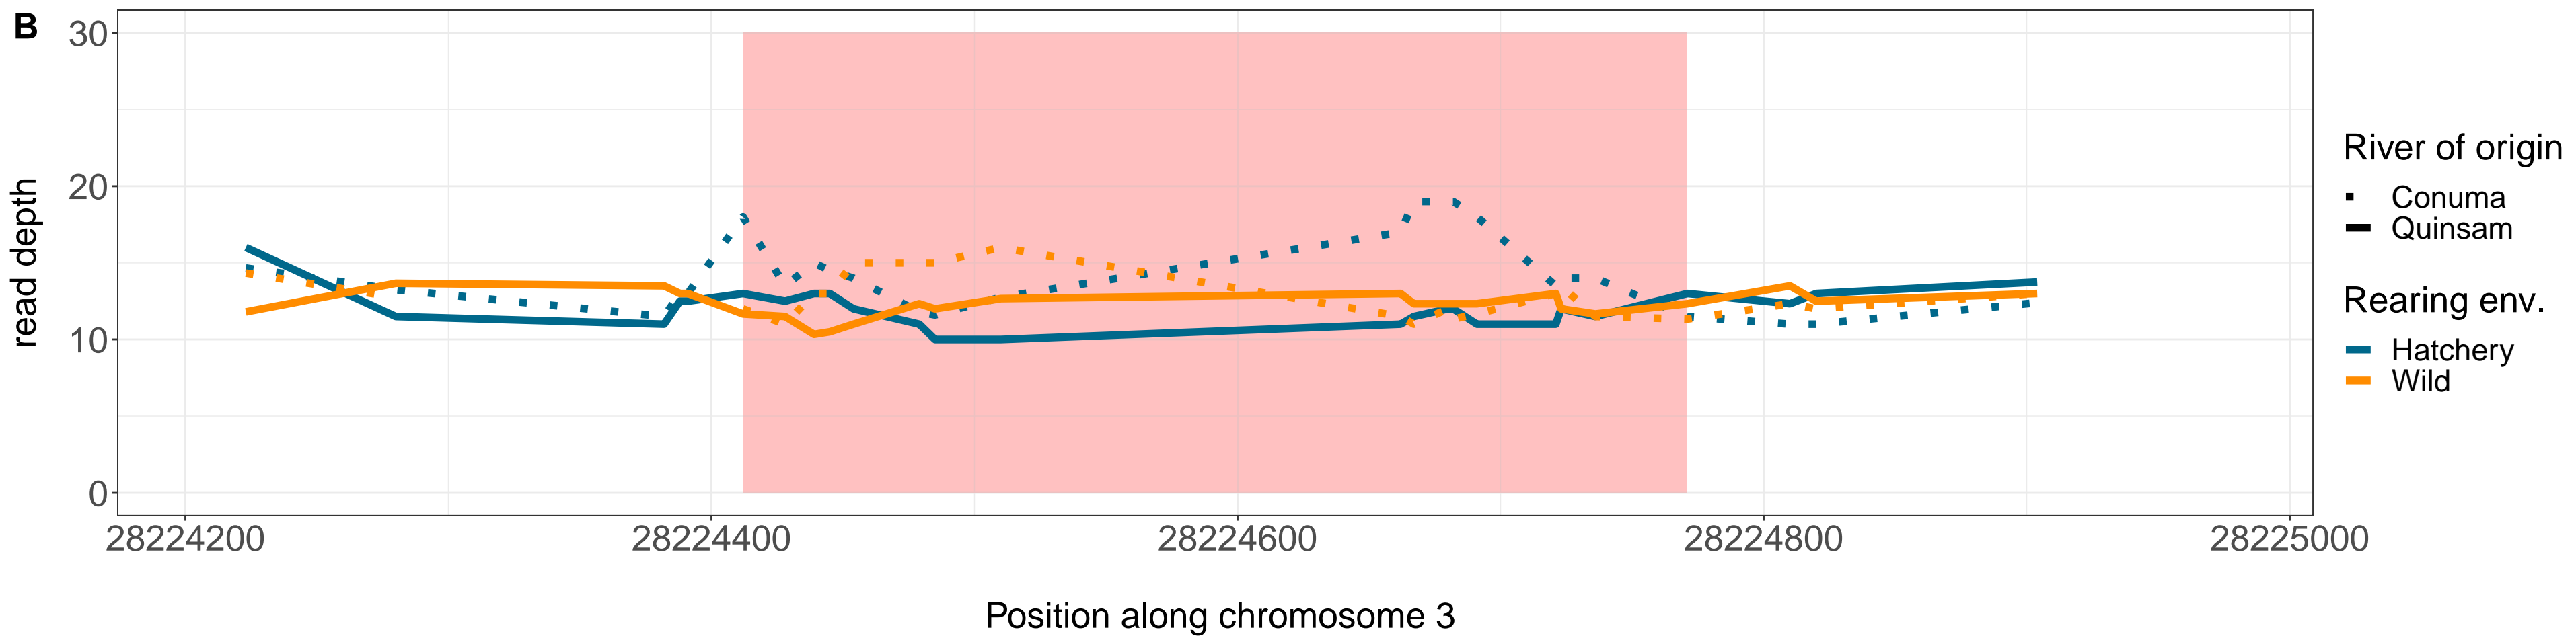

# DMR\_51

XM\_020478473.1

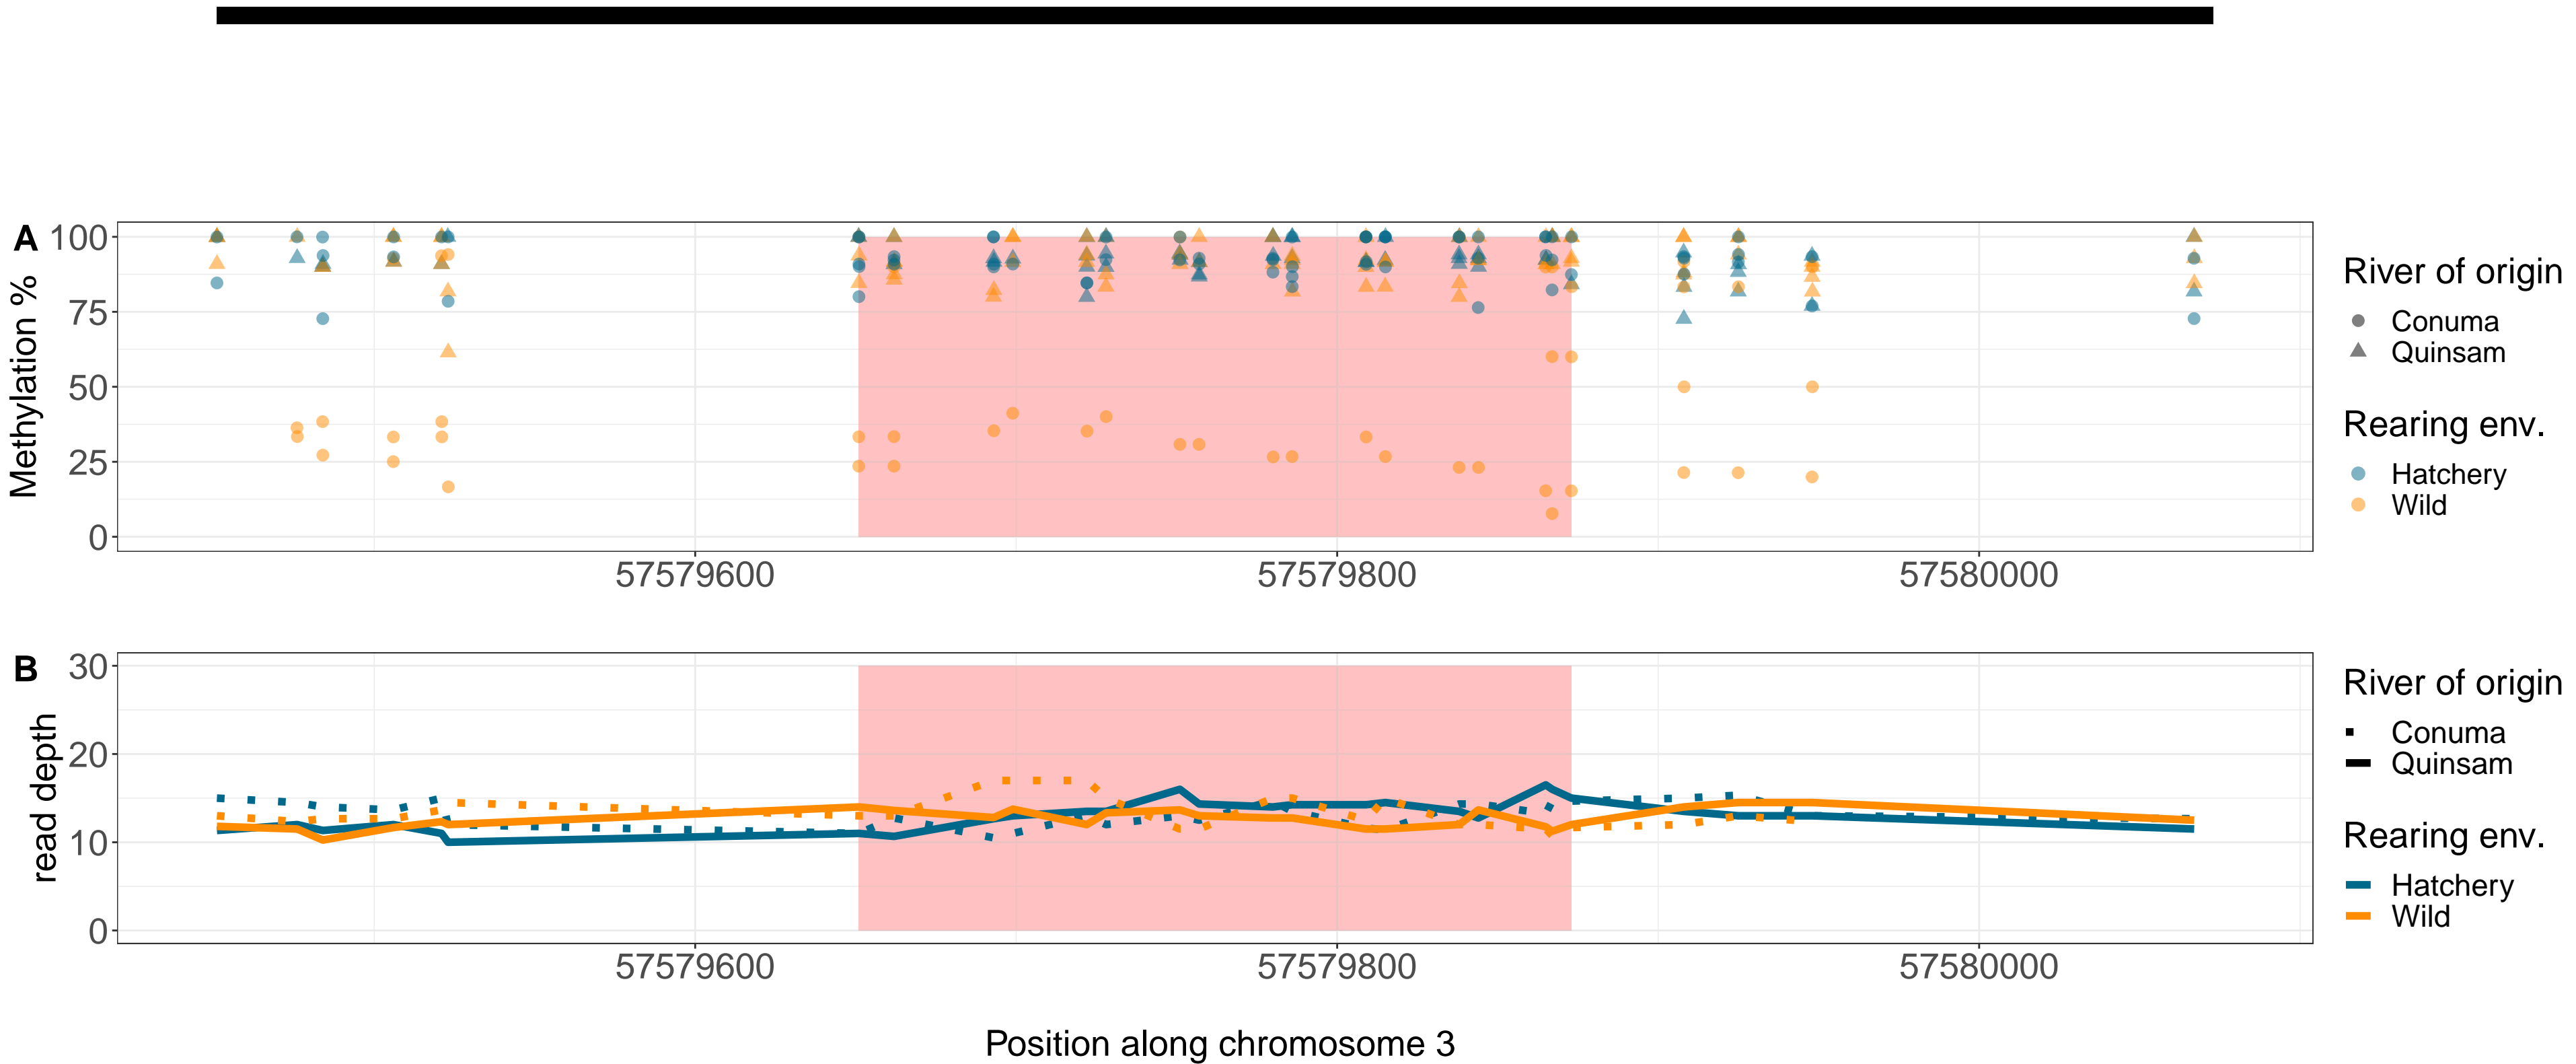

**A**

## DMR\_53

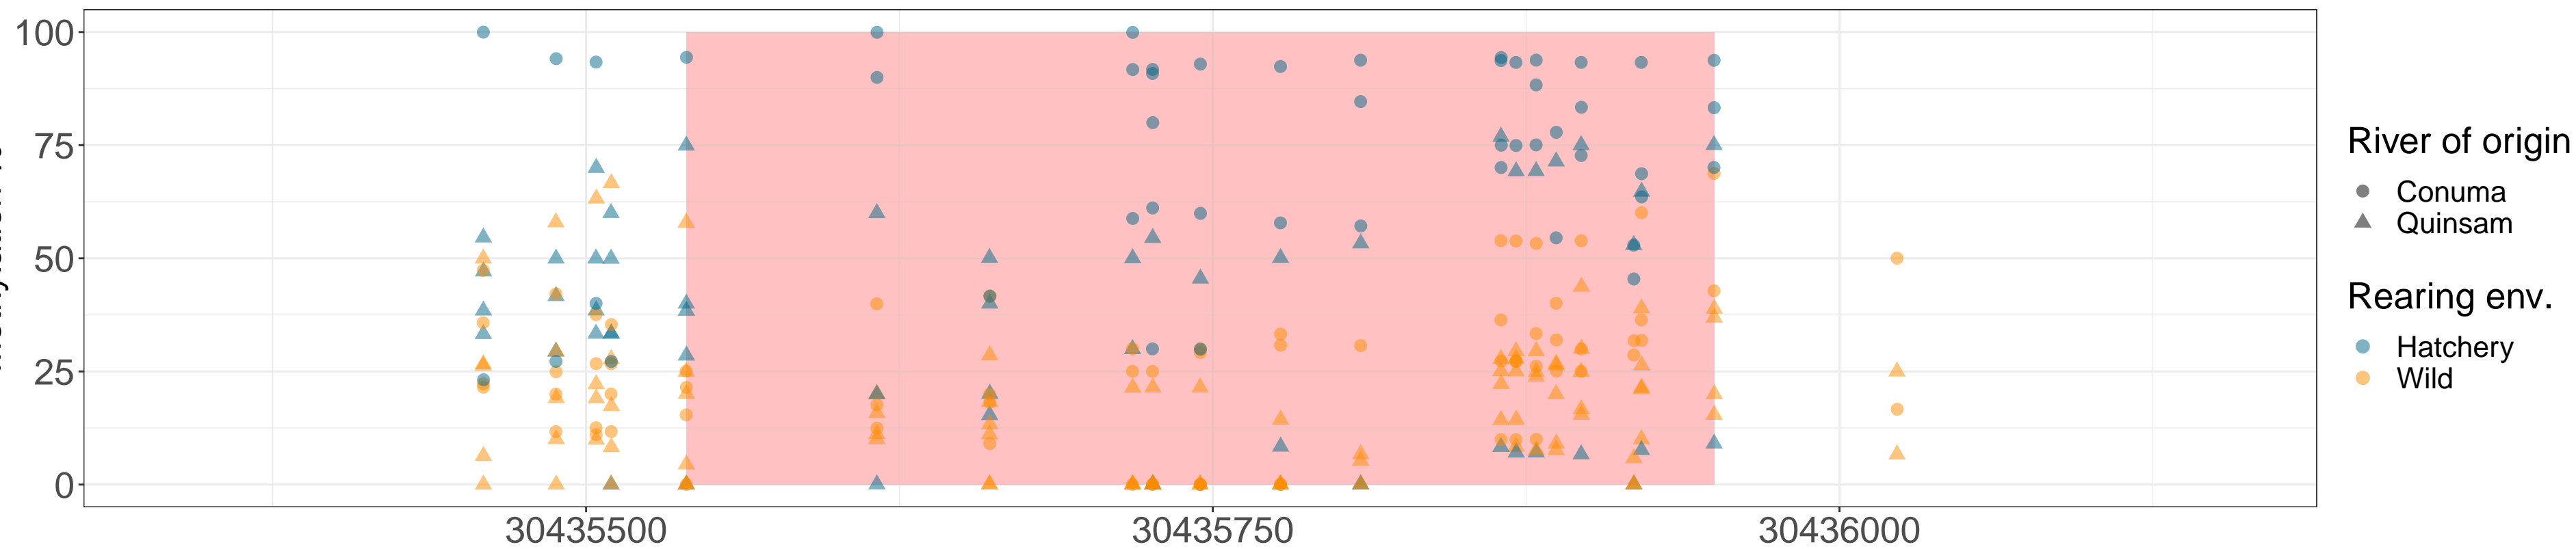**B**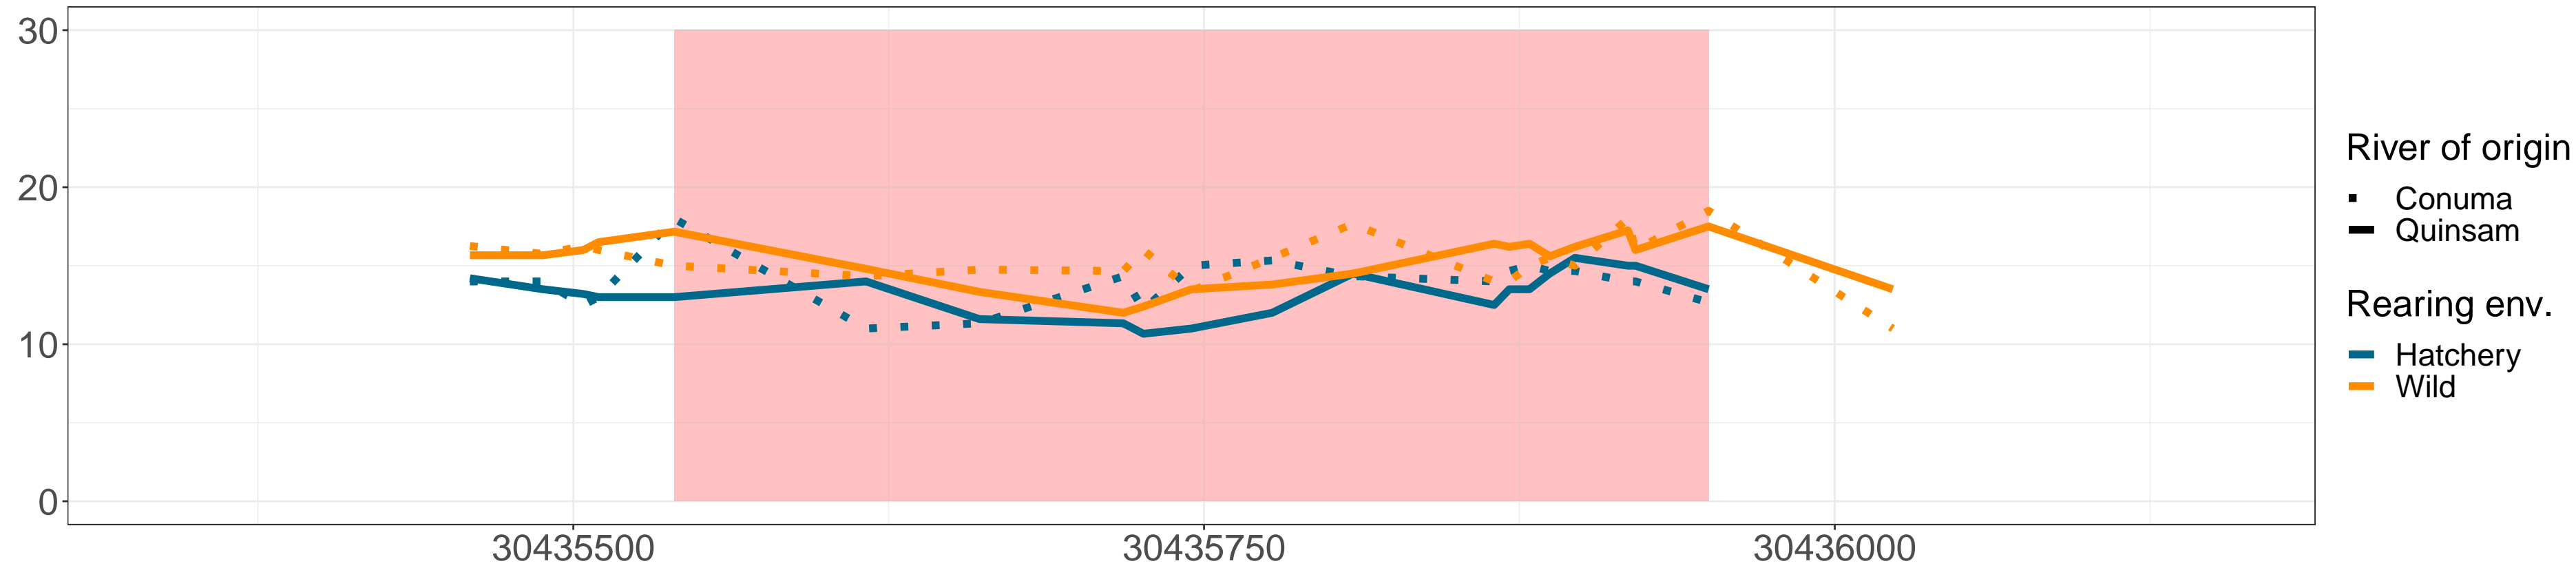

Position along chromosome 13

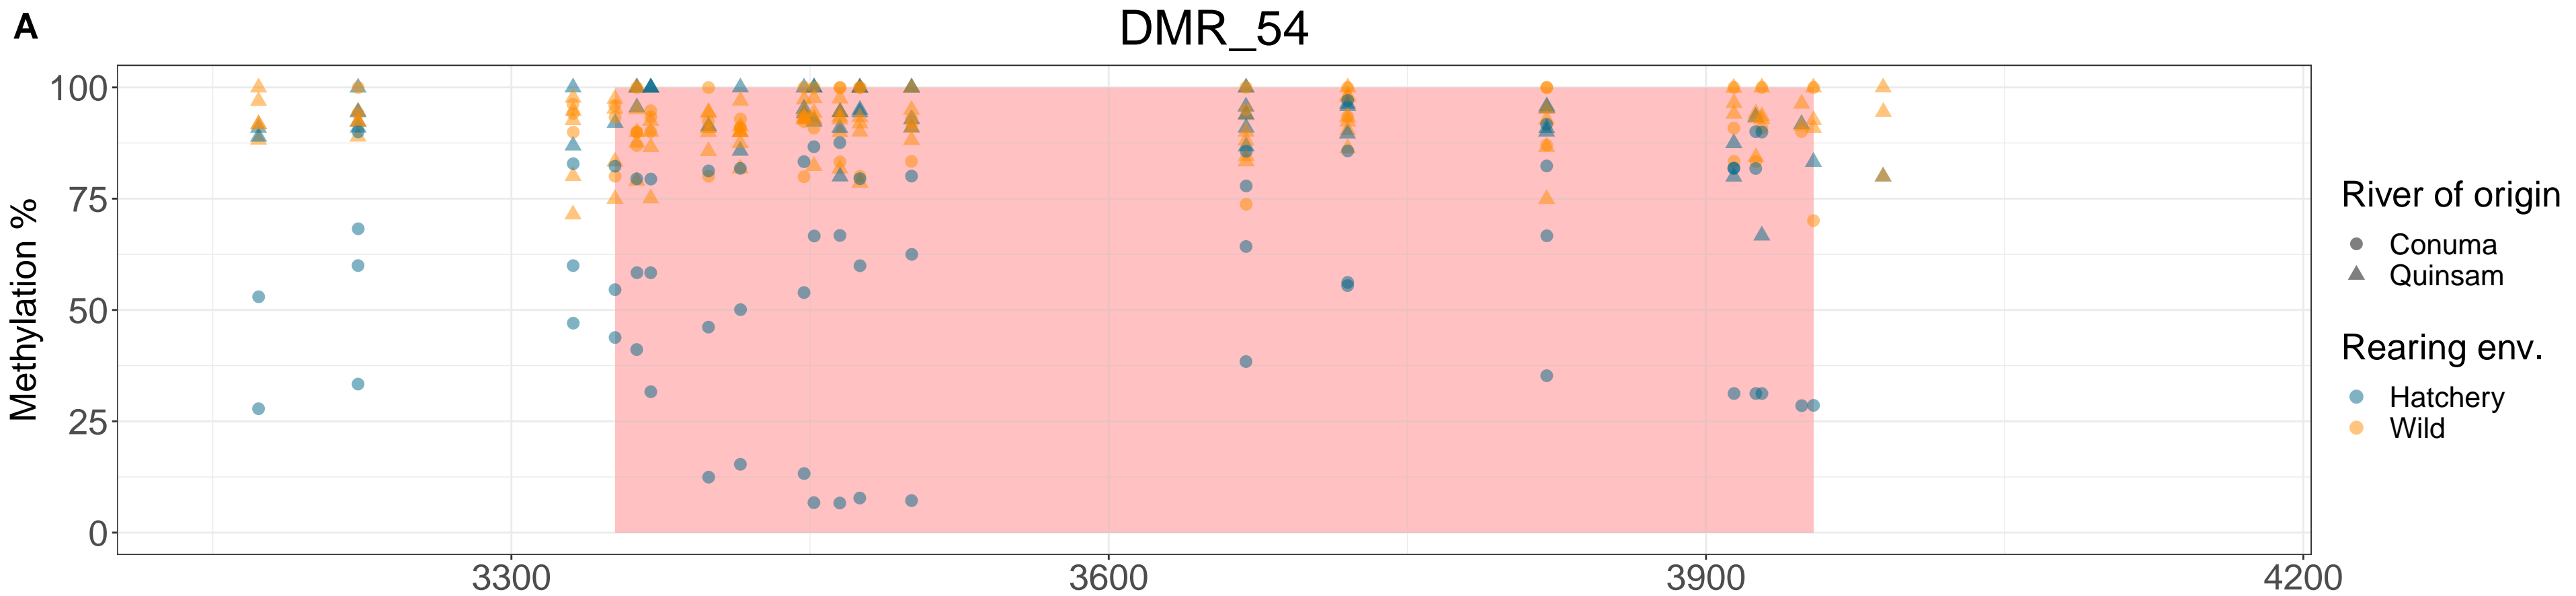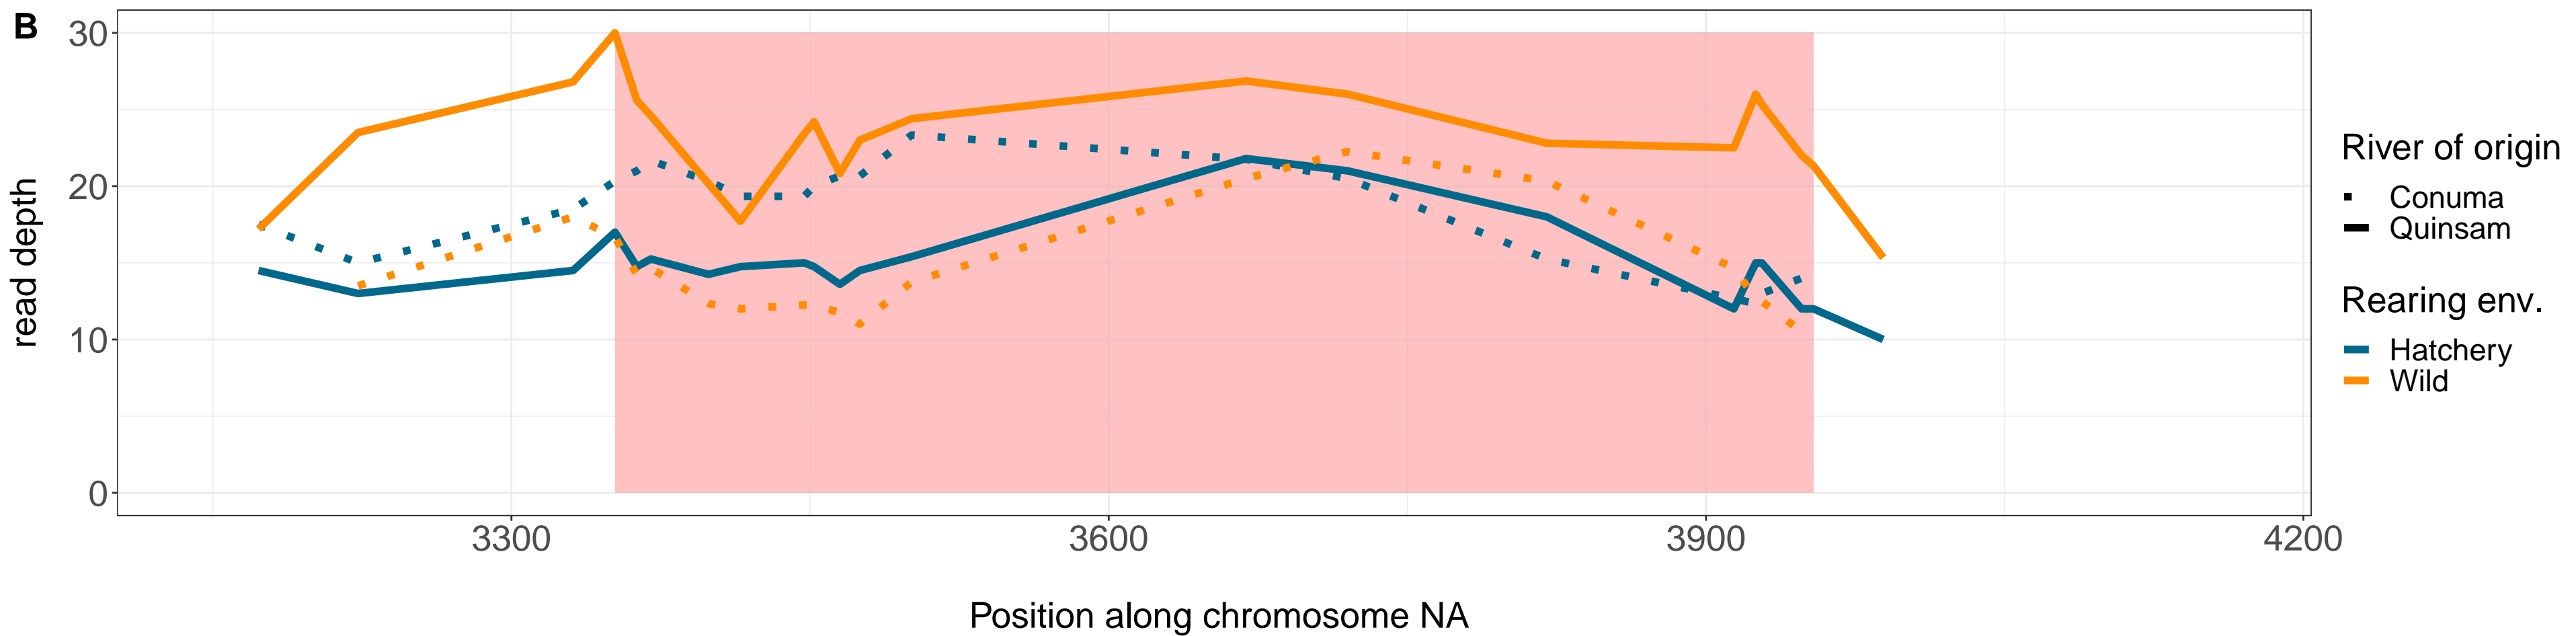

**A**

## DMR\_55

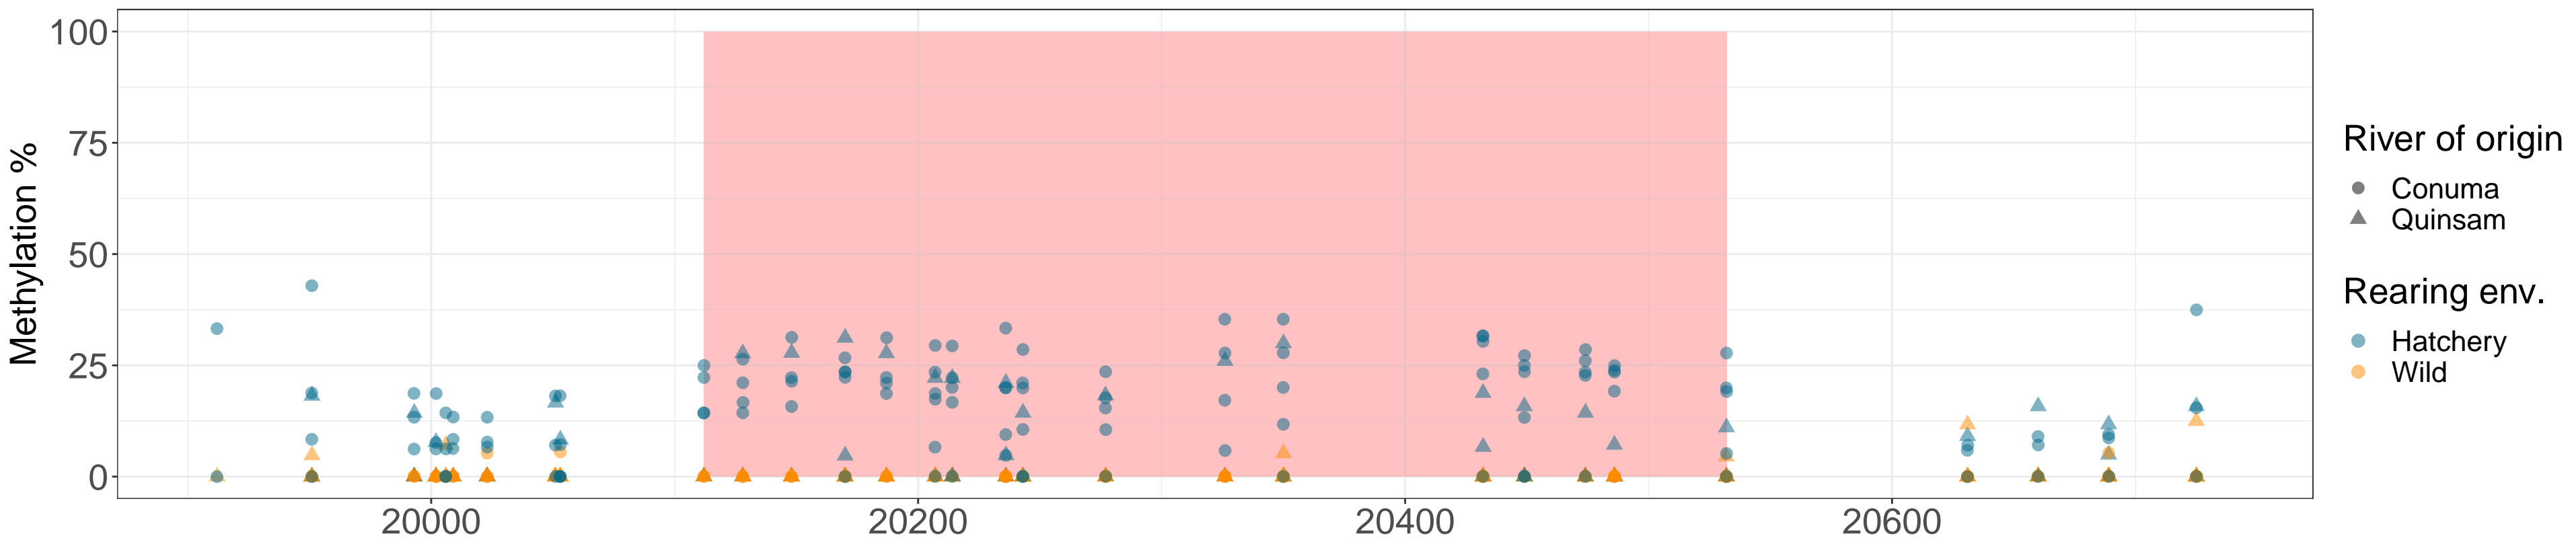**B**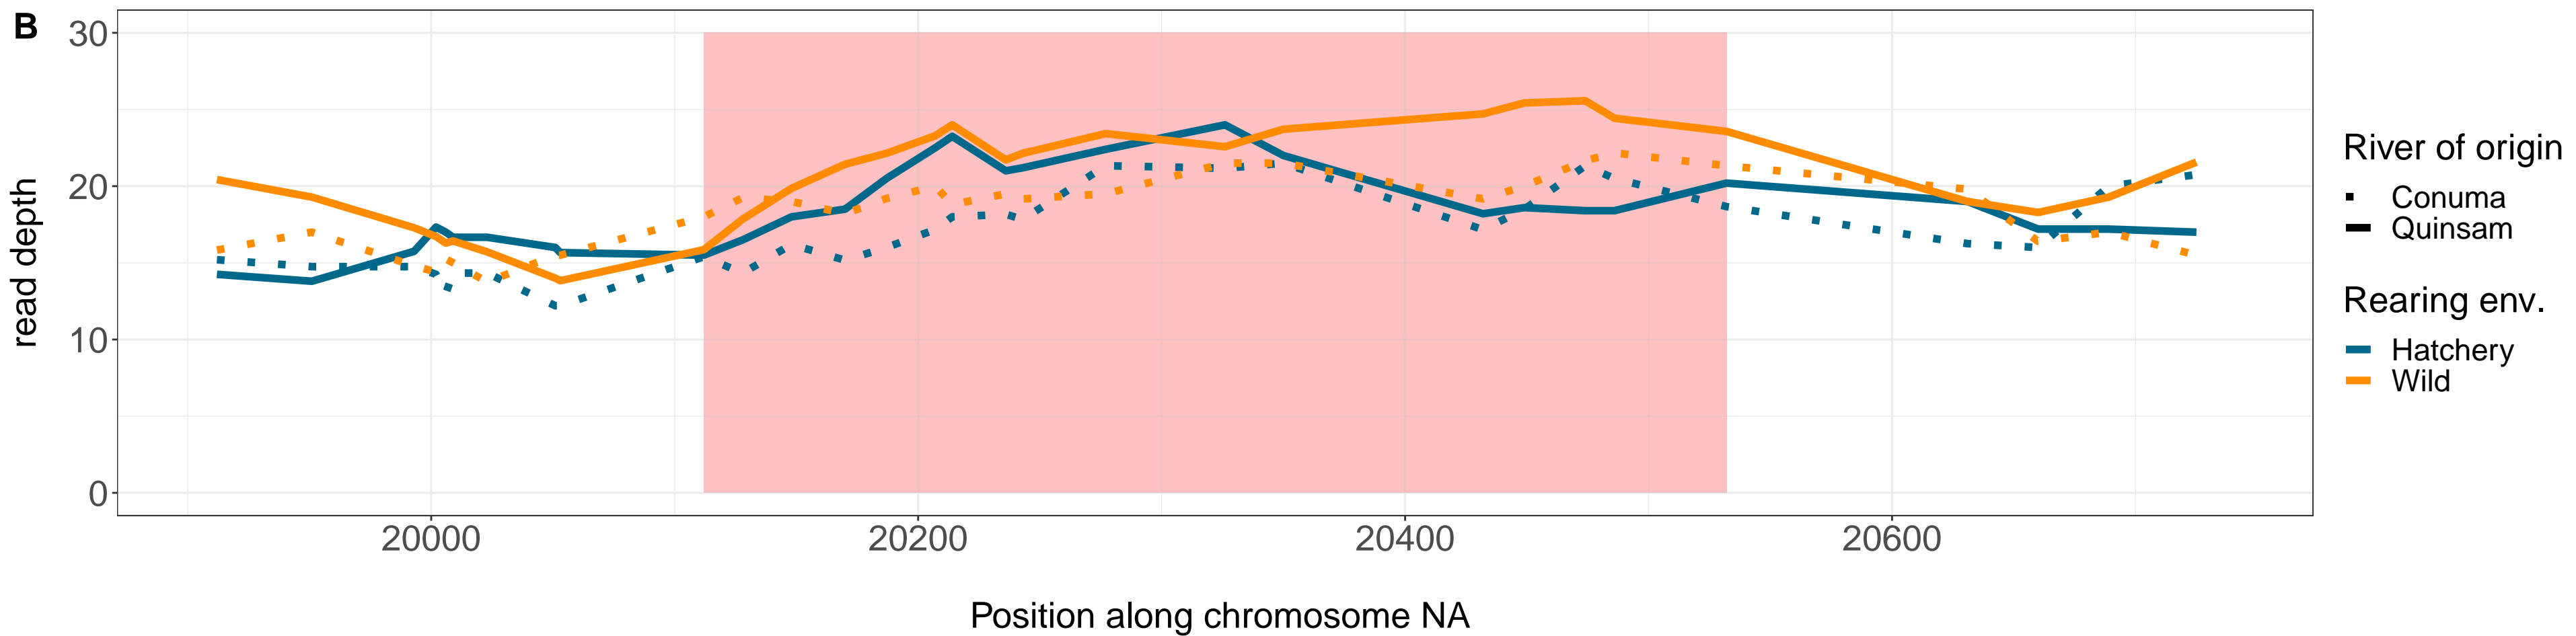

**A**

## DMR\_56

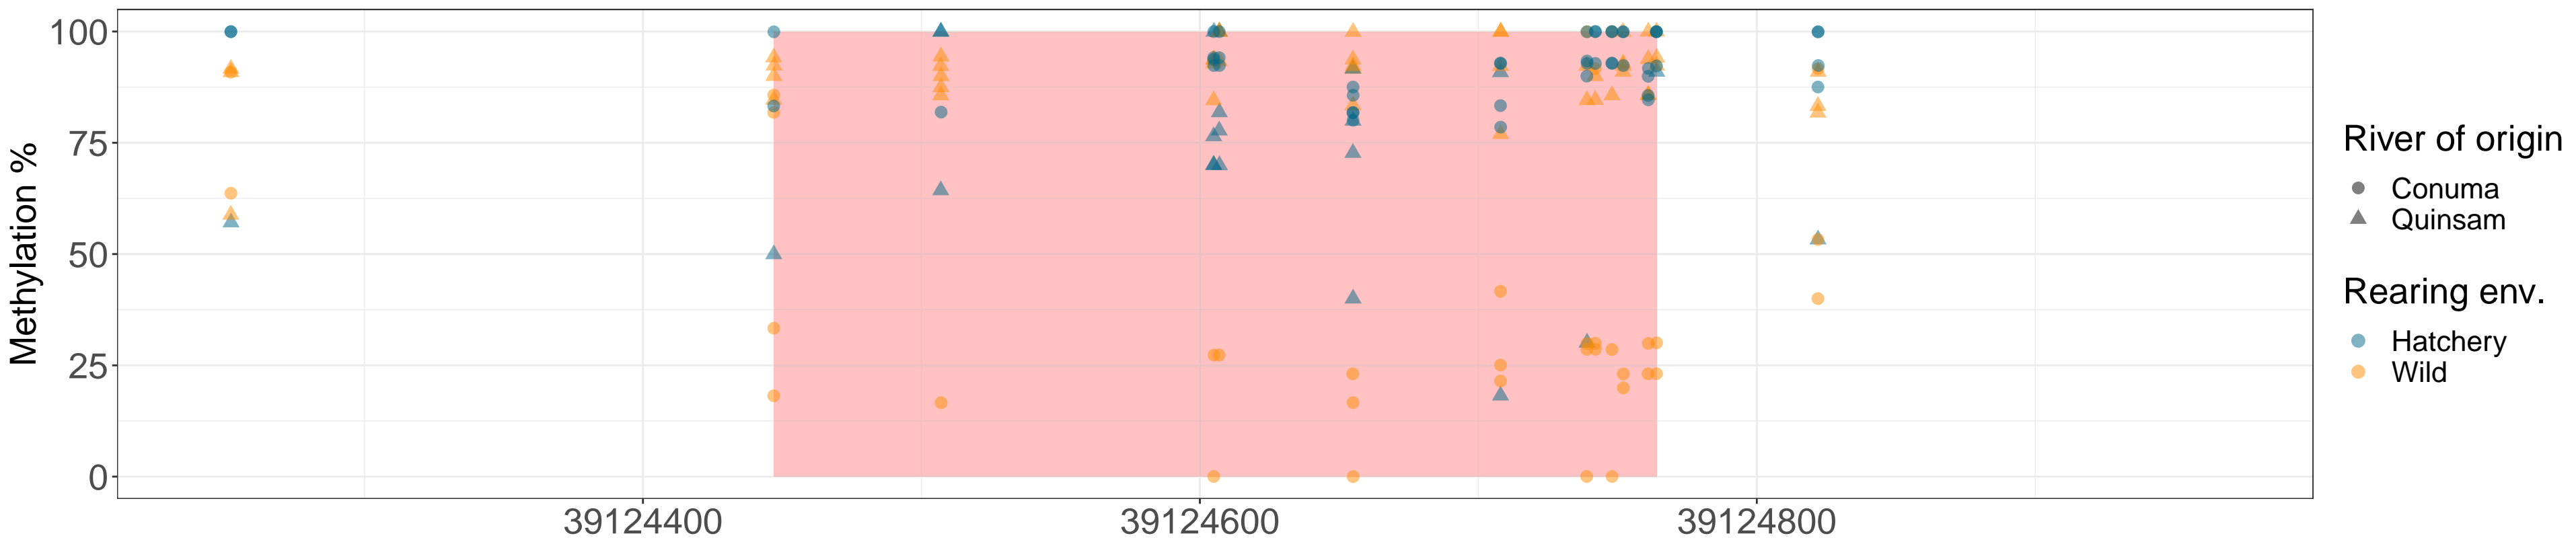**B**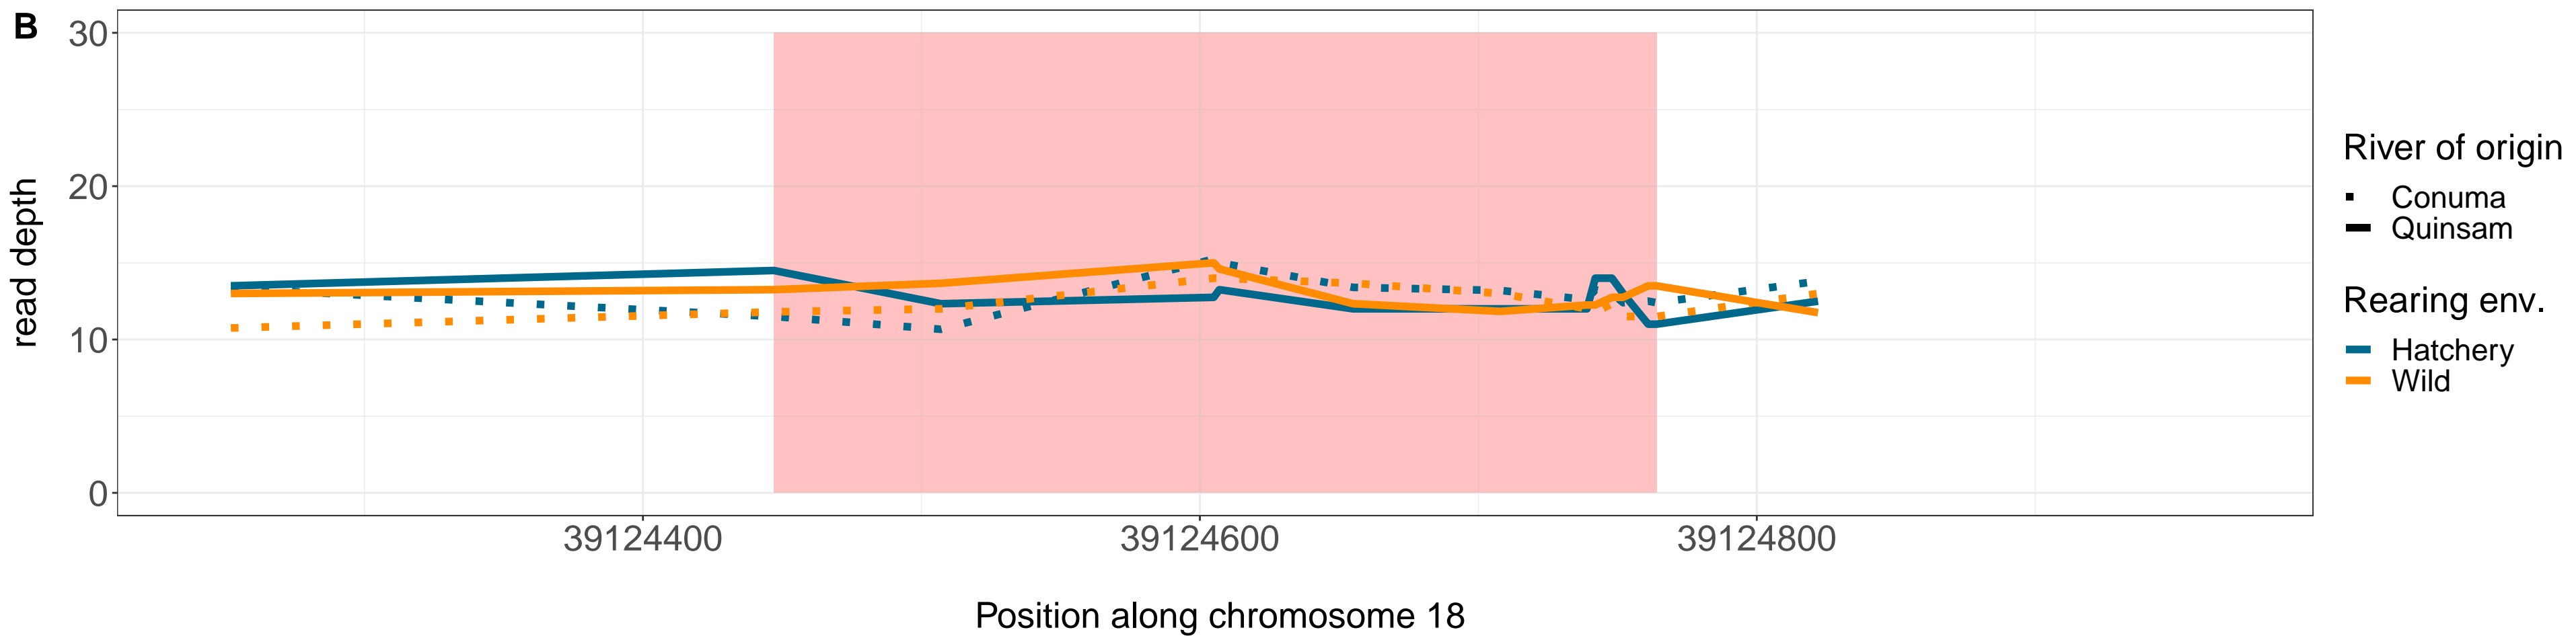

# DMR\_57

**A**
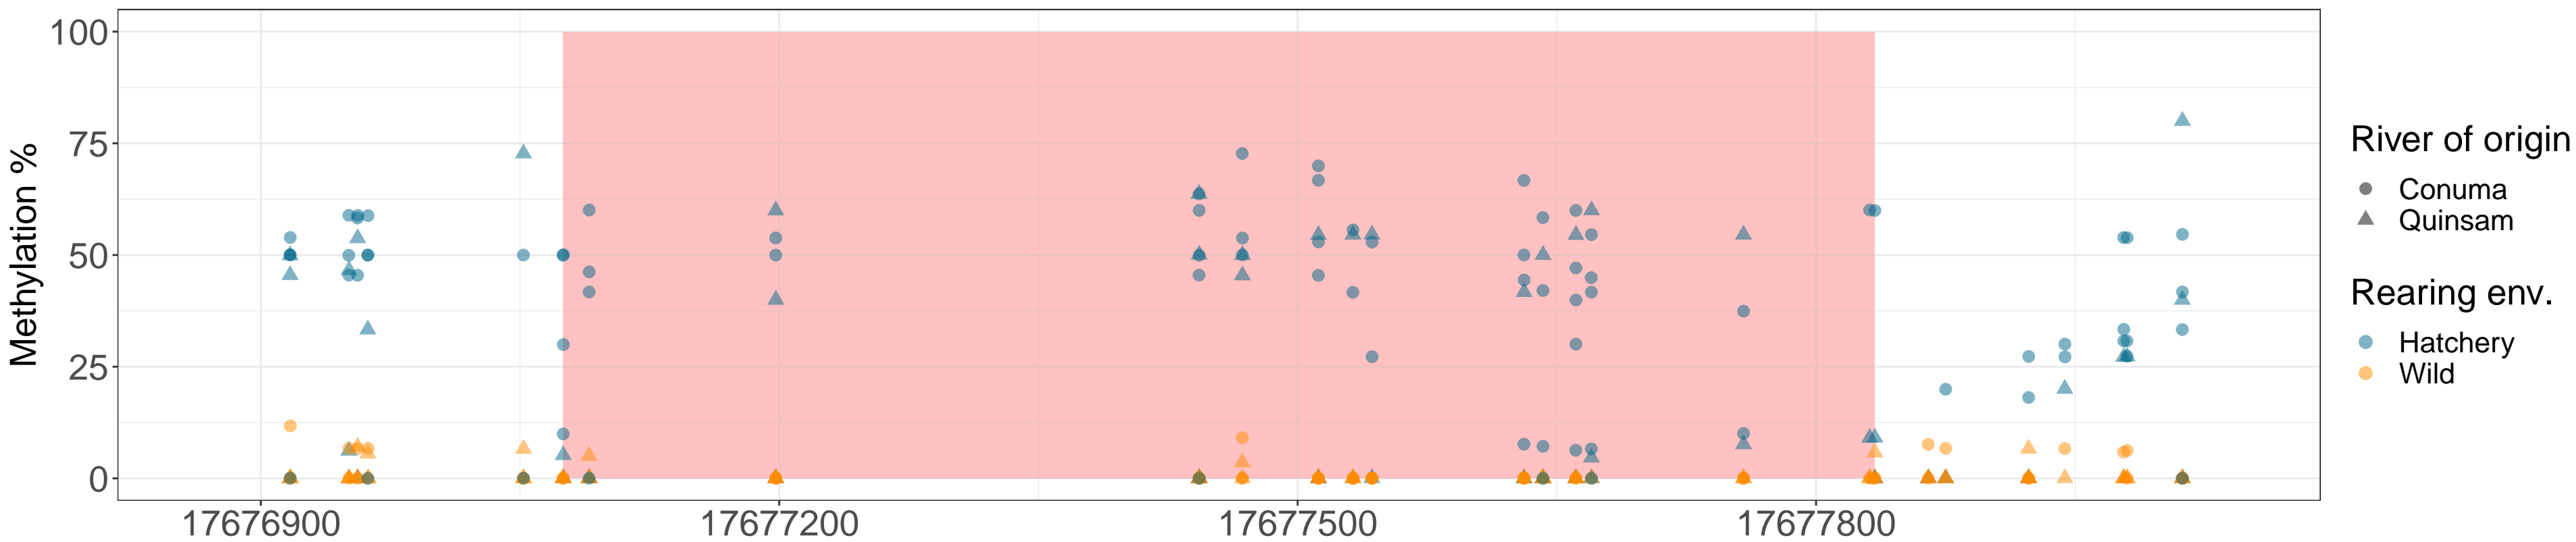
**B**
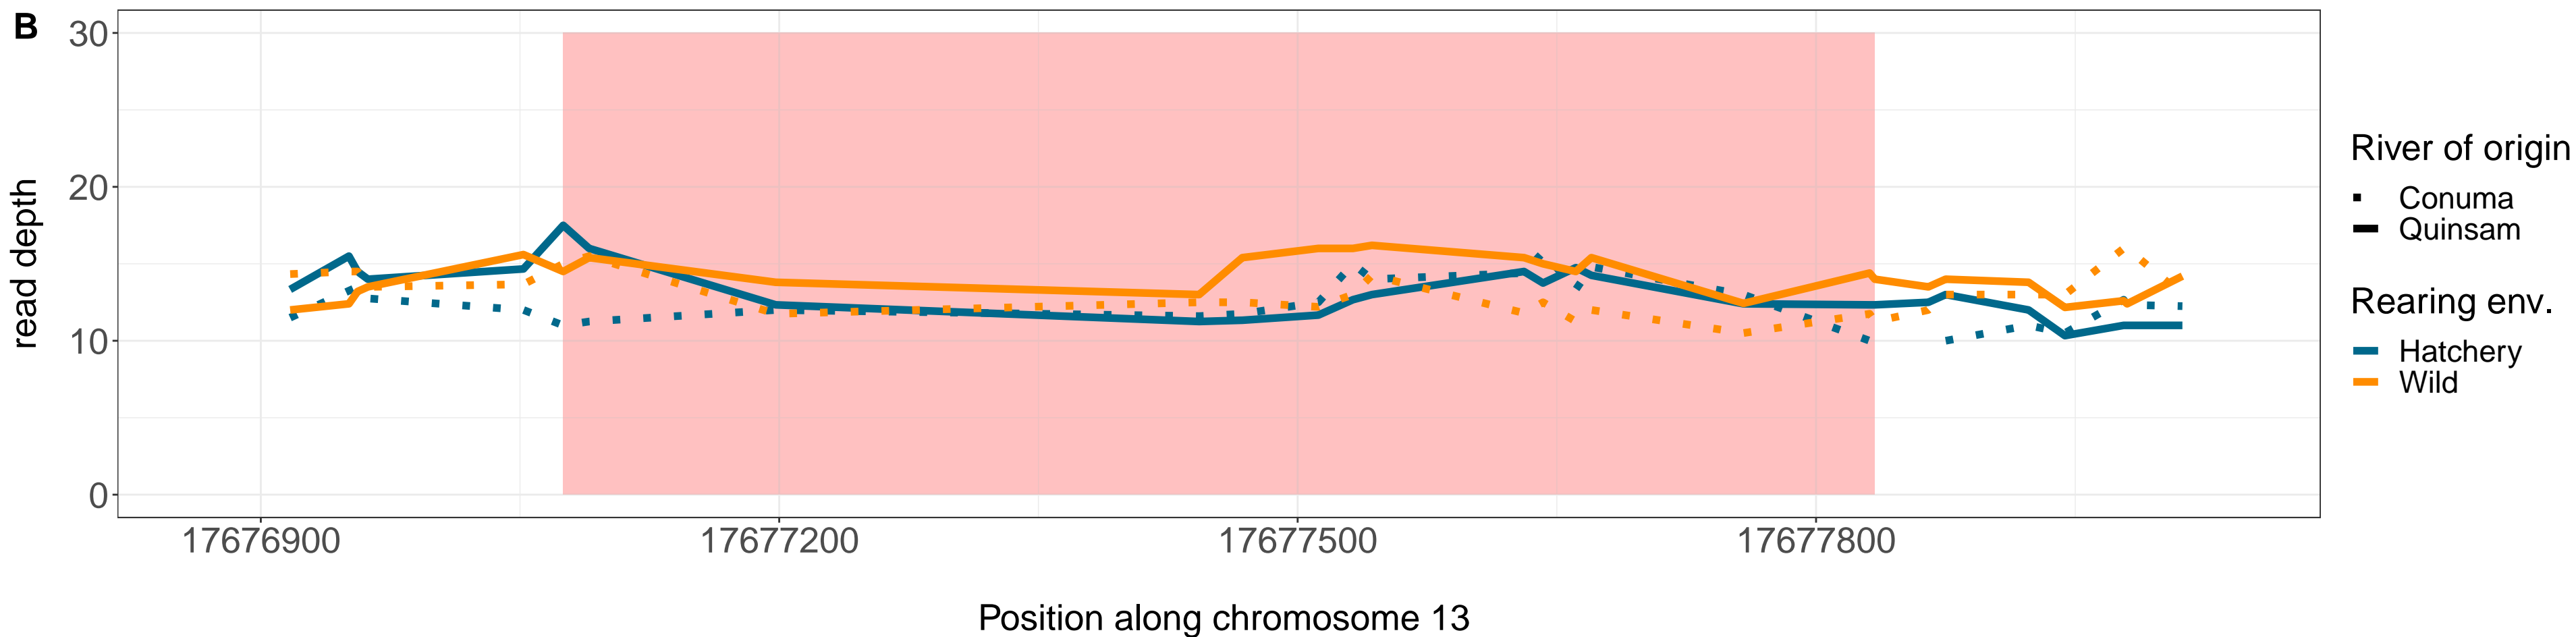



**A**

## DMR\_58

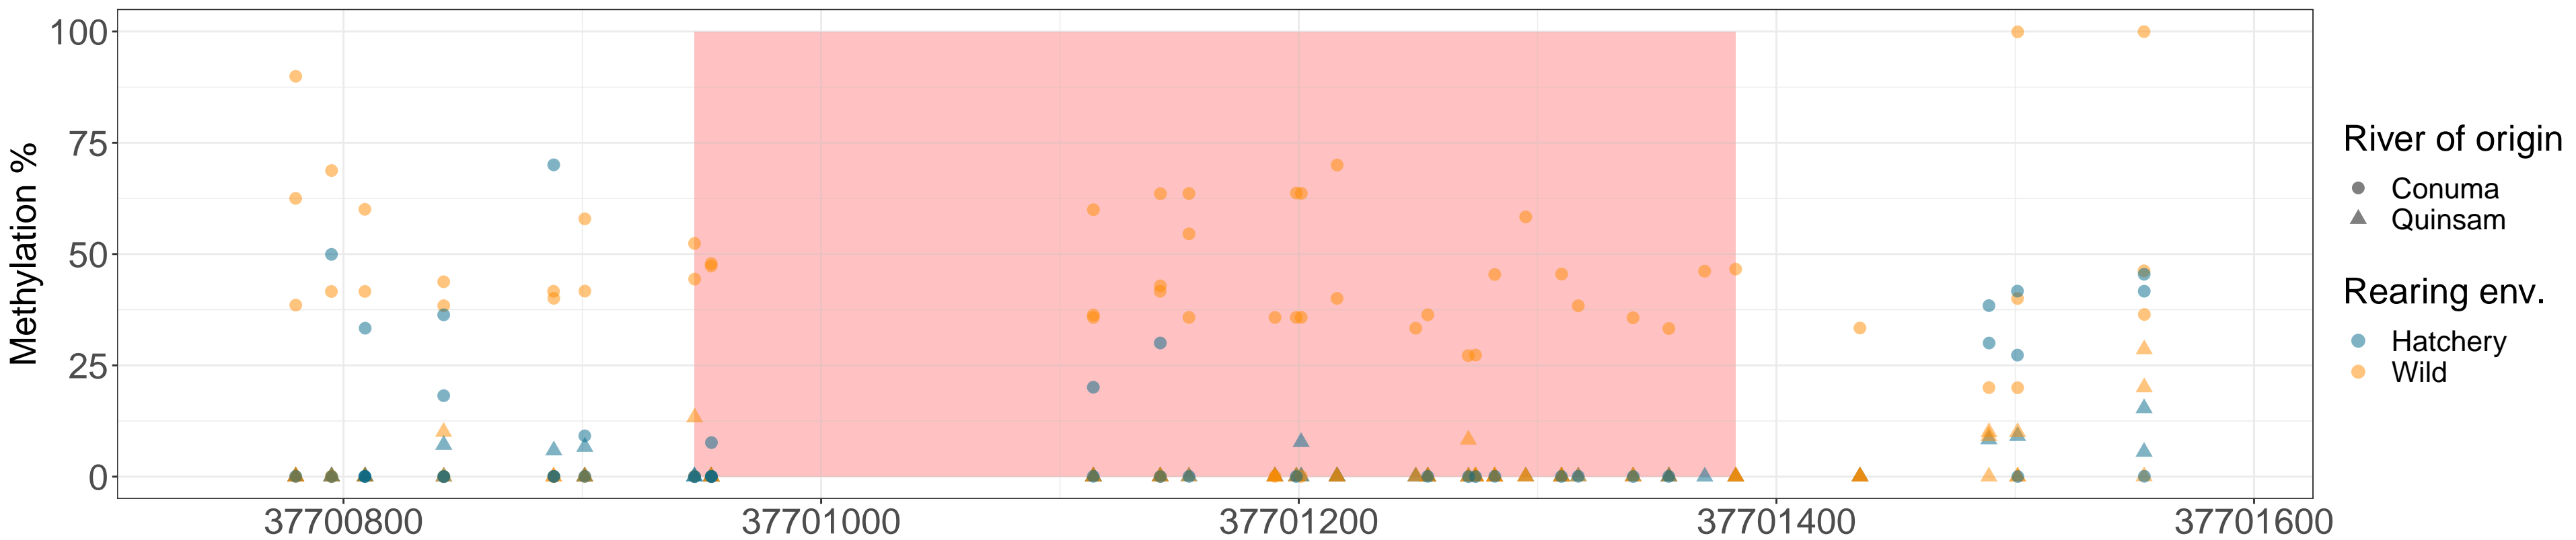**B**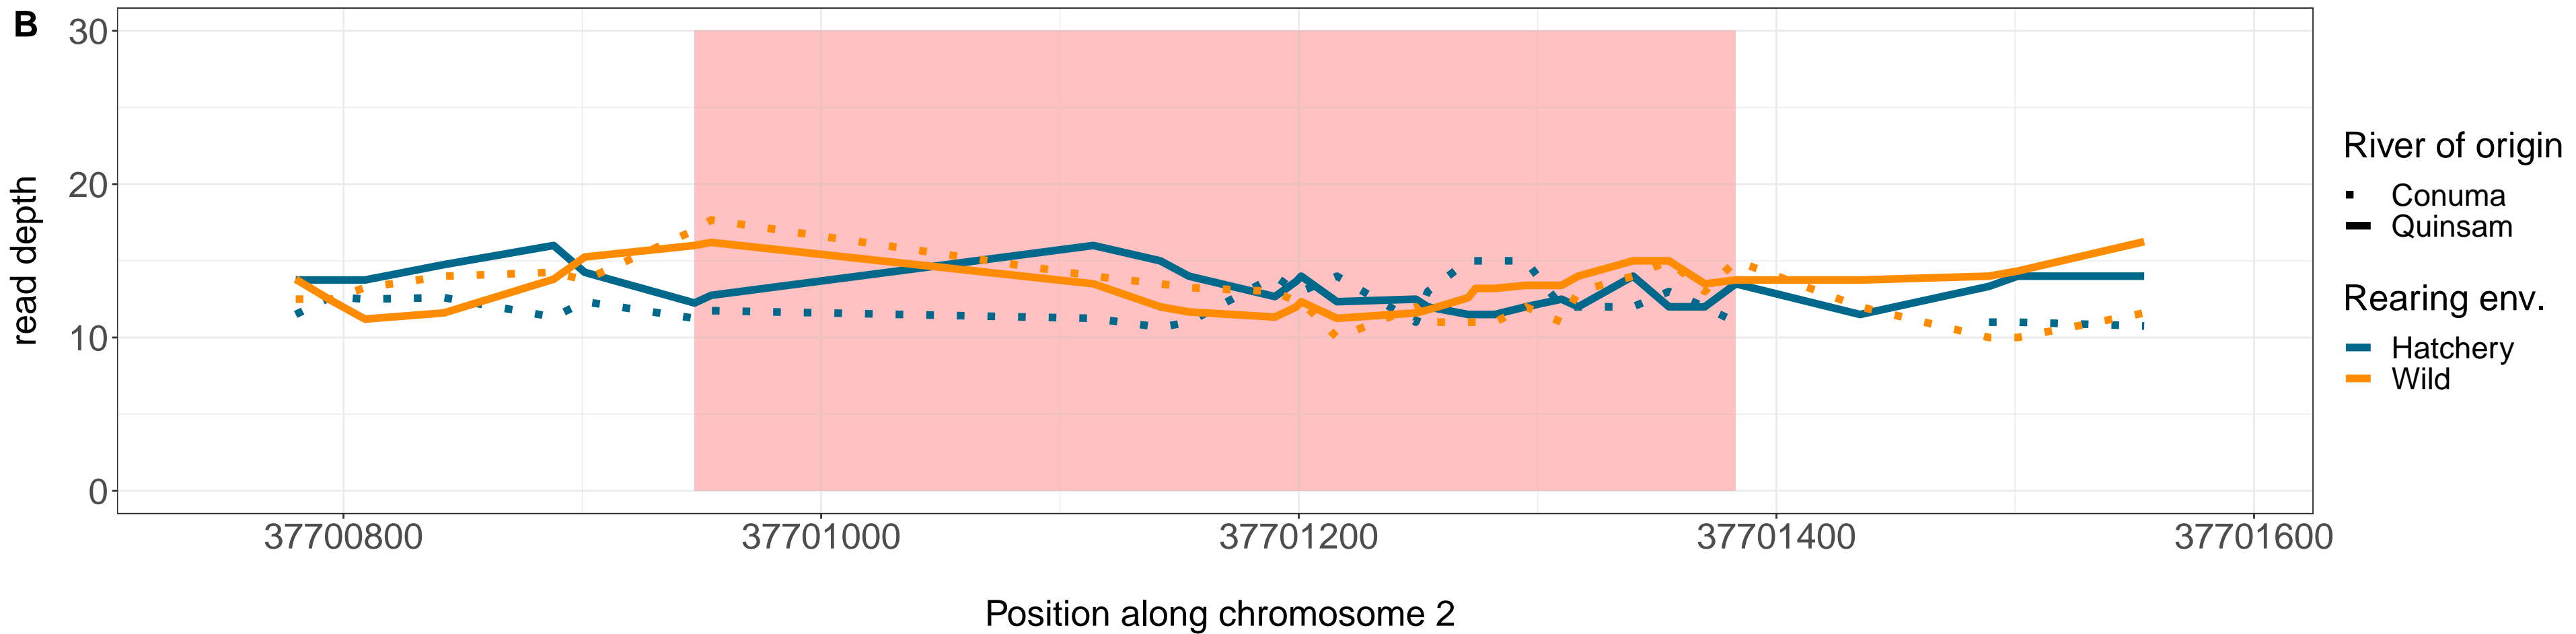

# DMR\_59

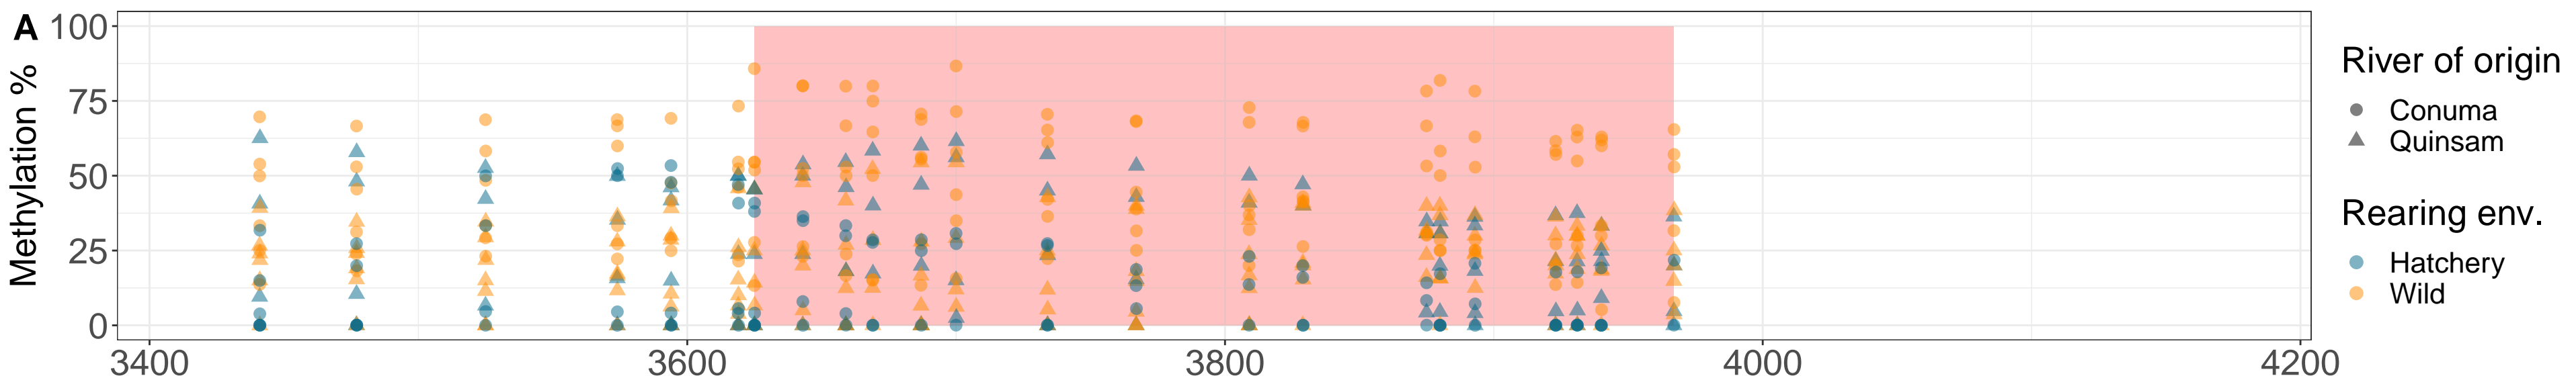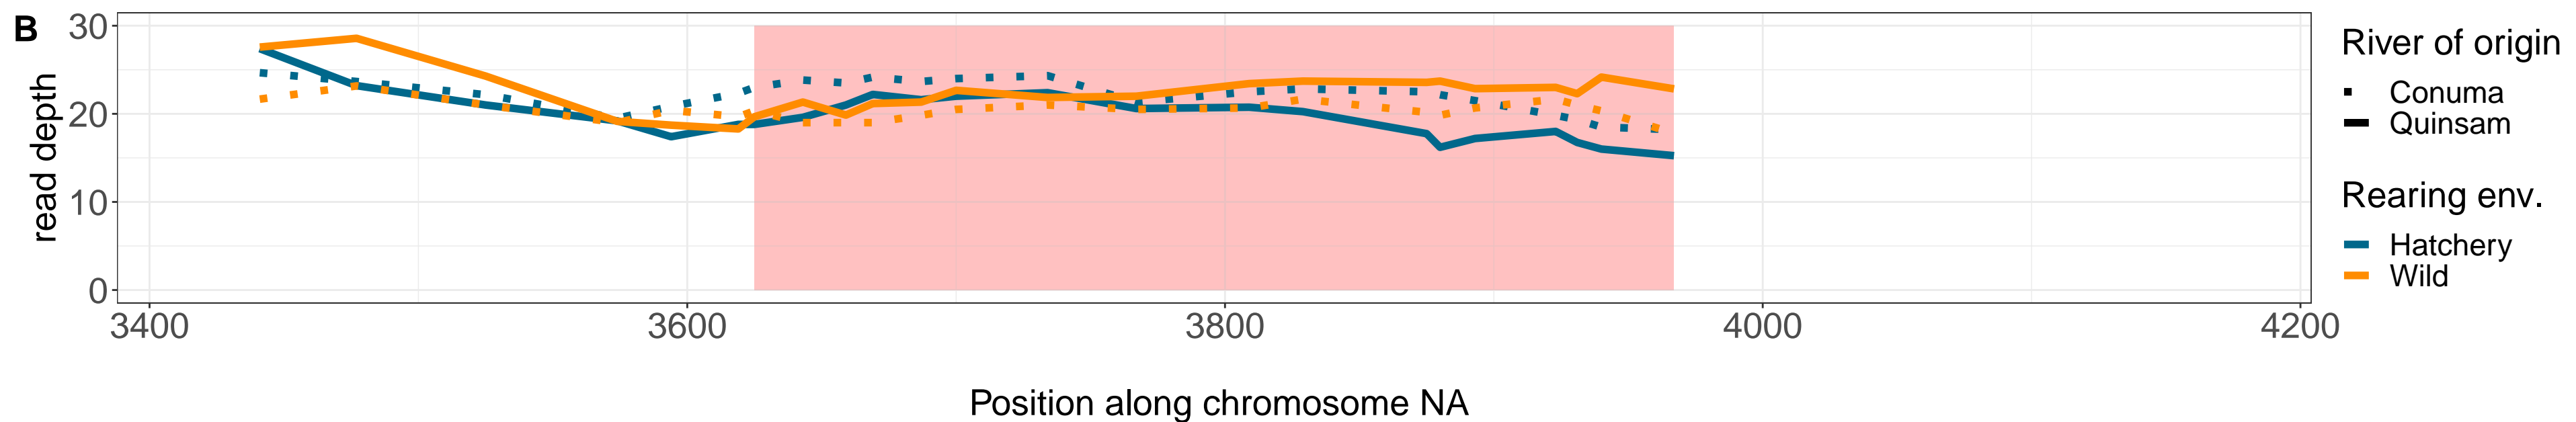

**A**

DMR\_60

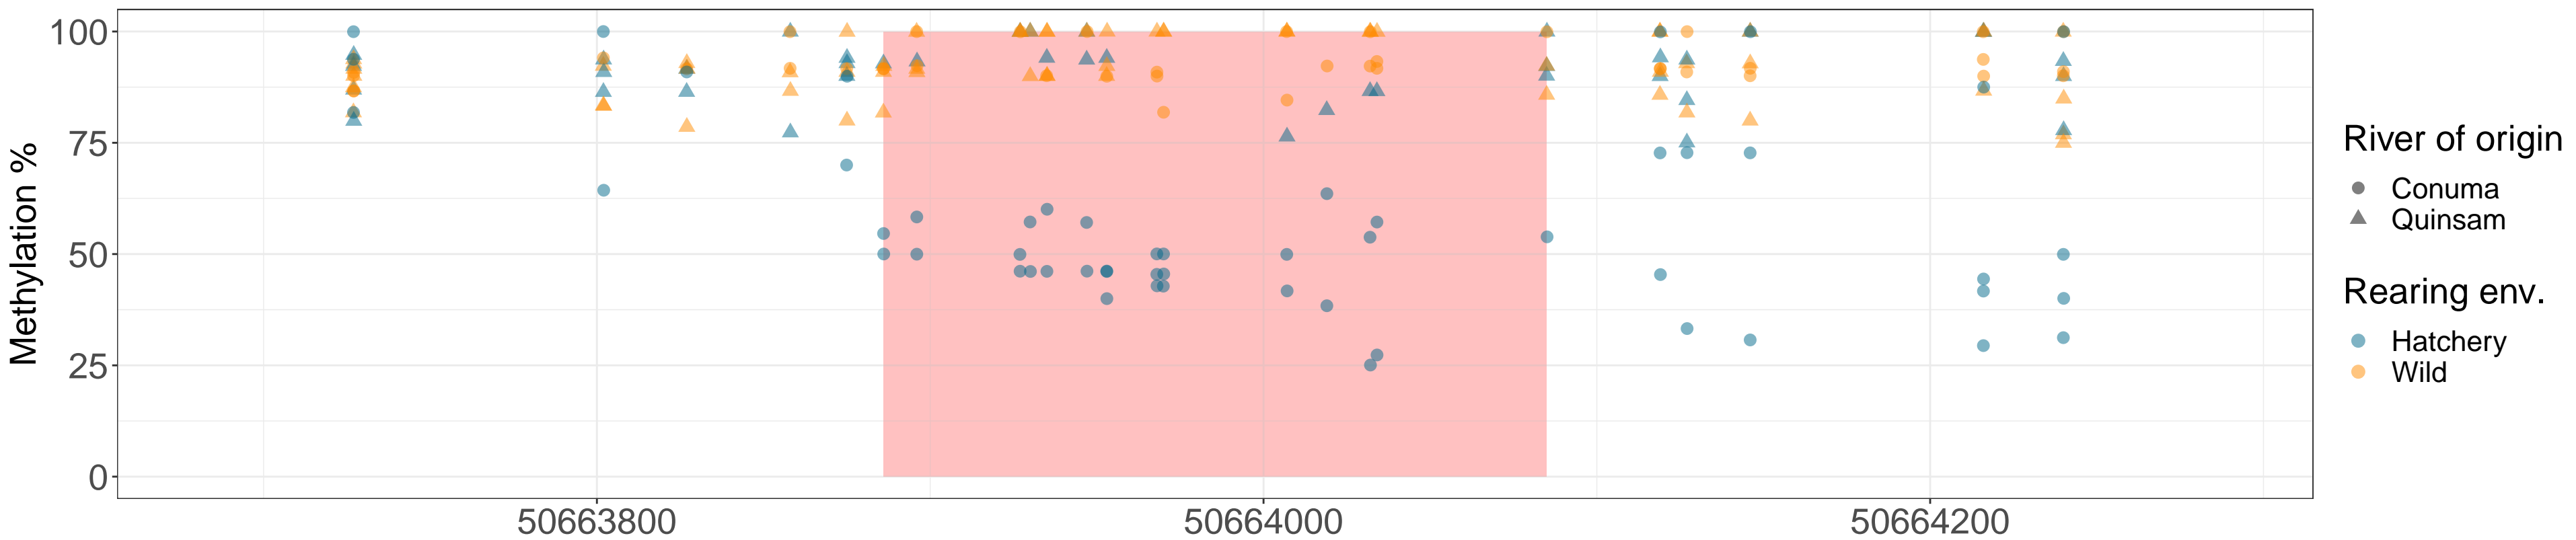**B**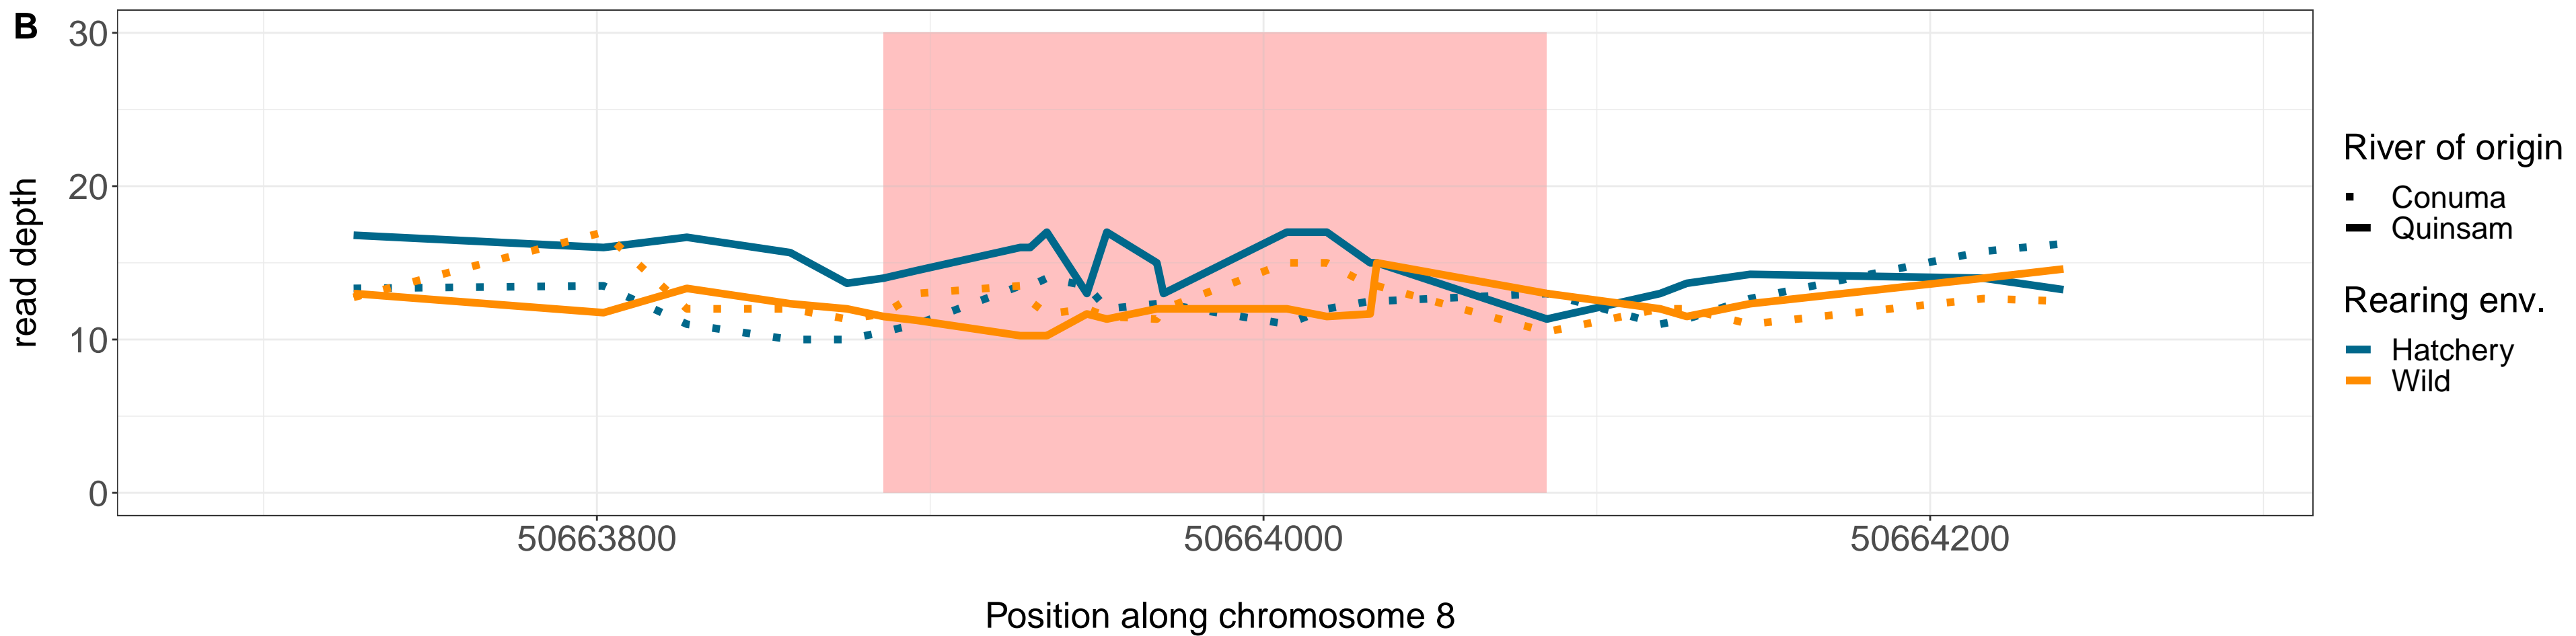

**A**

DMR\_61

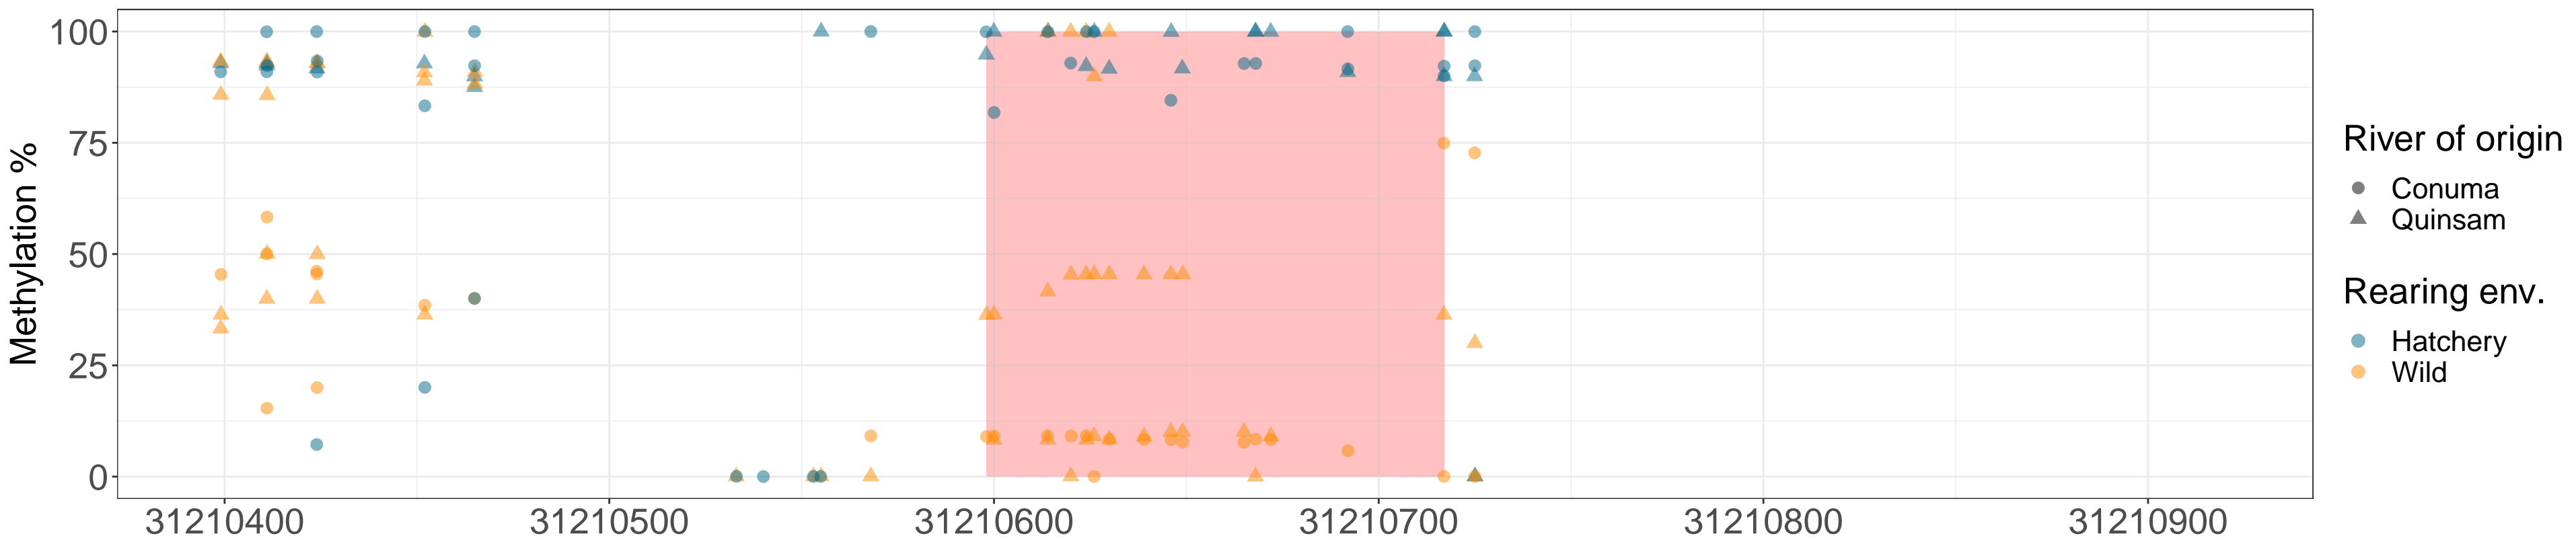**B**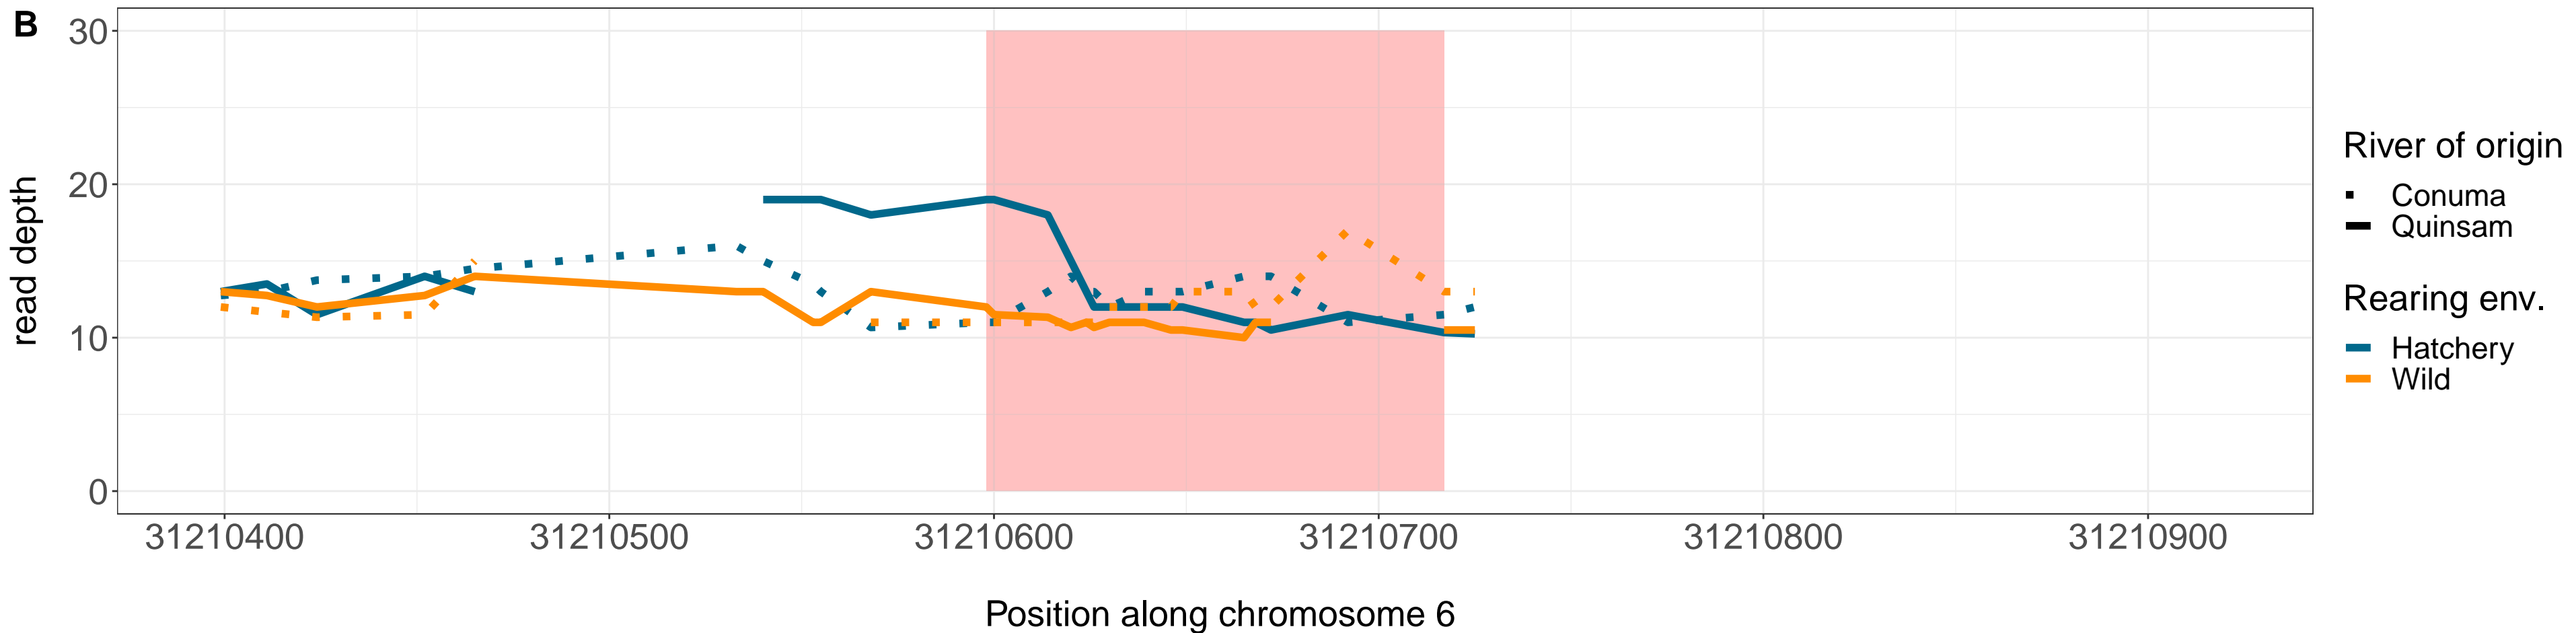

# DMR\_62

XM\_020474921.1

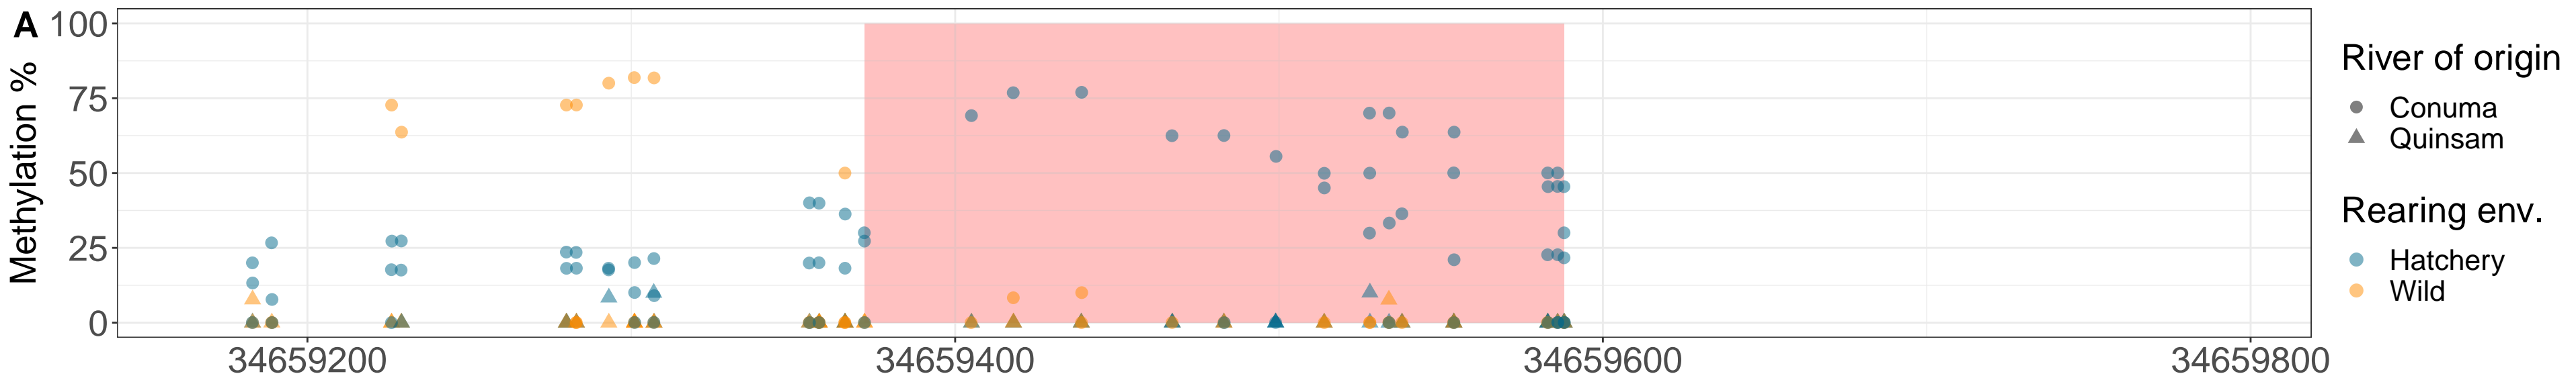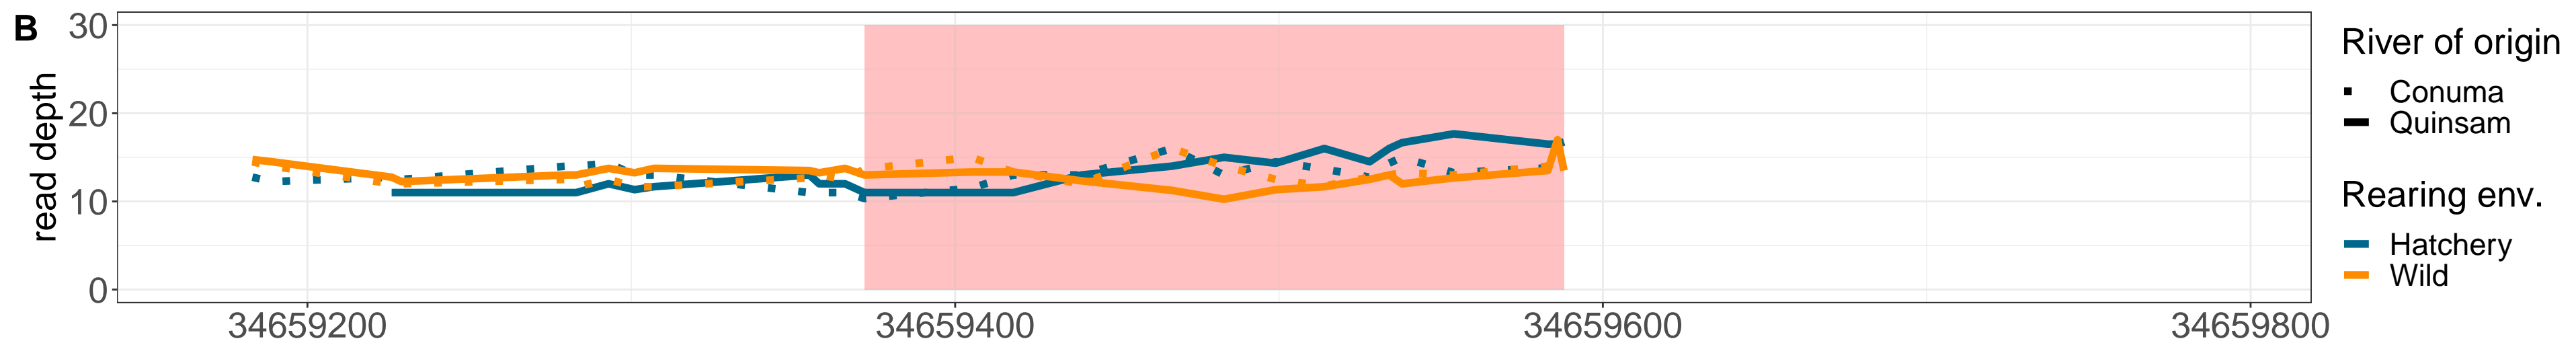

Position along chromosome 3

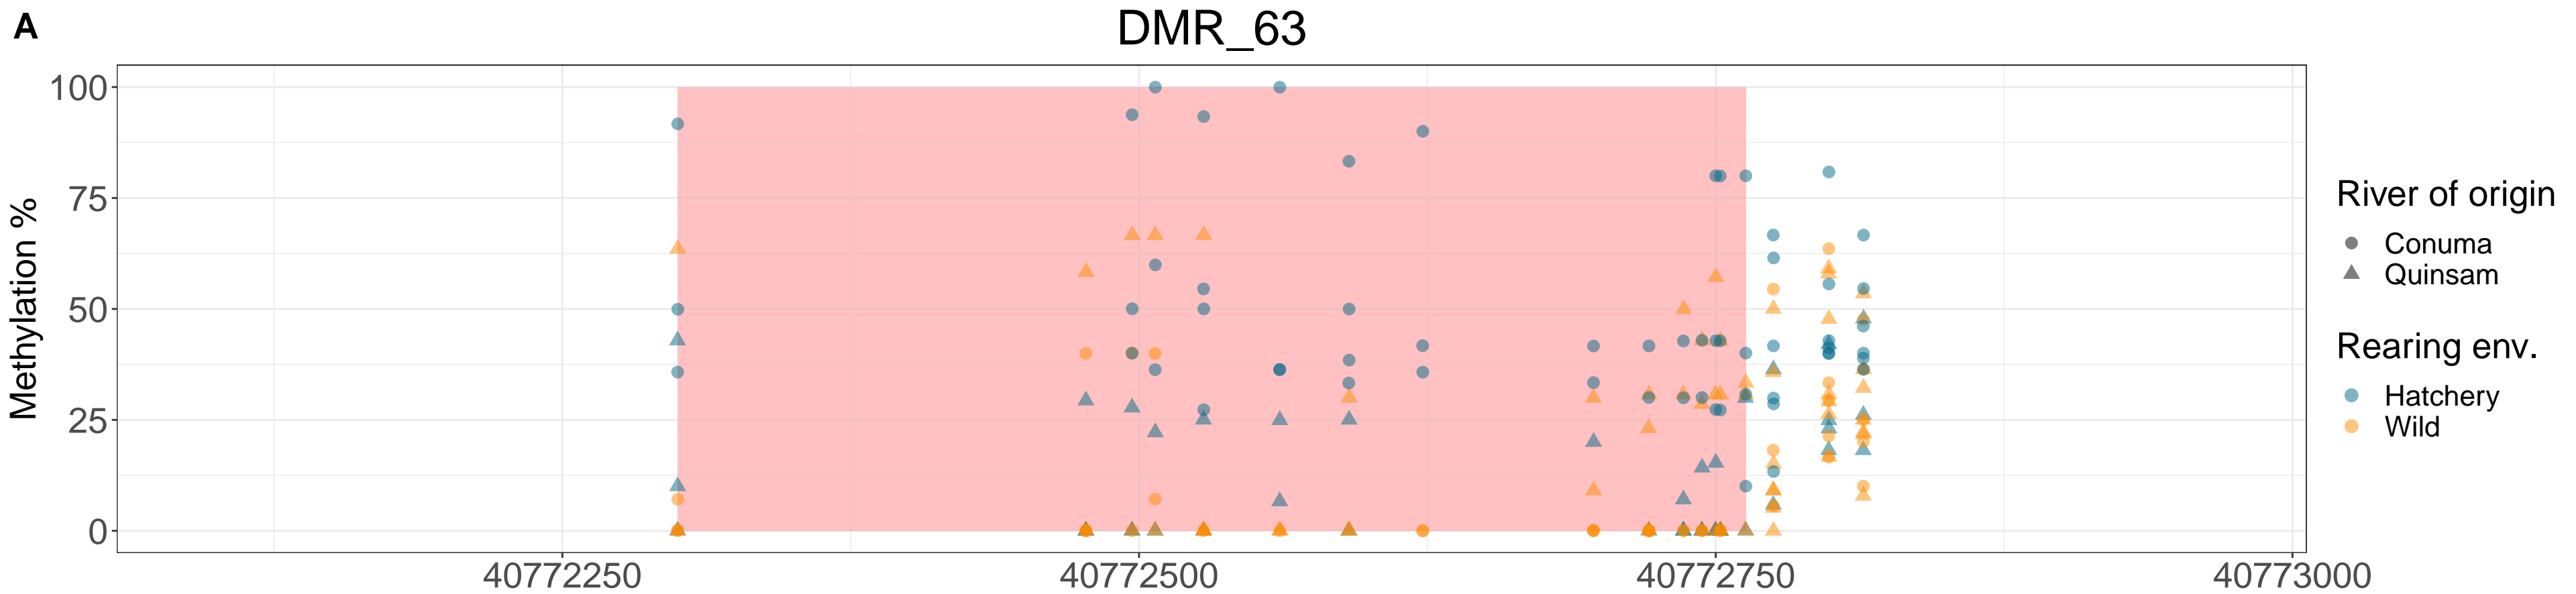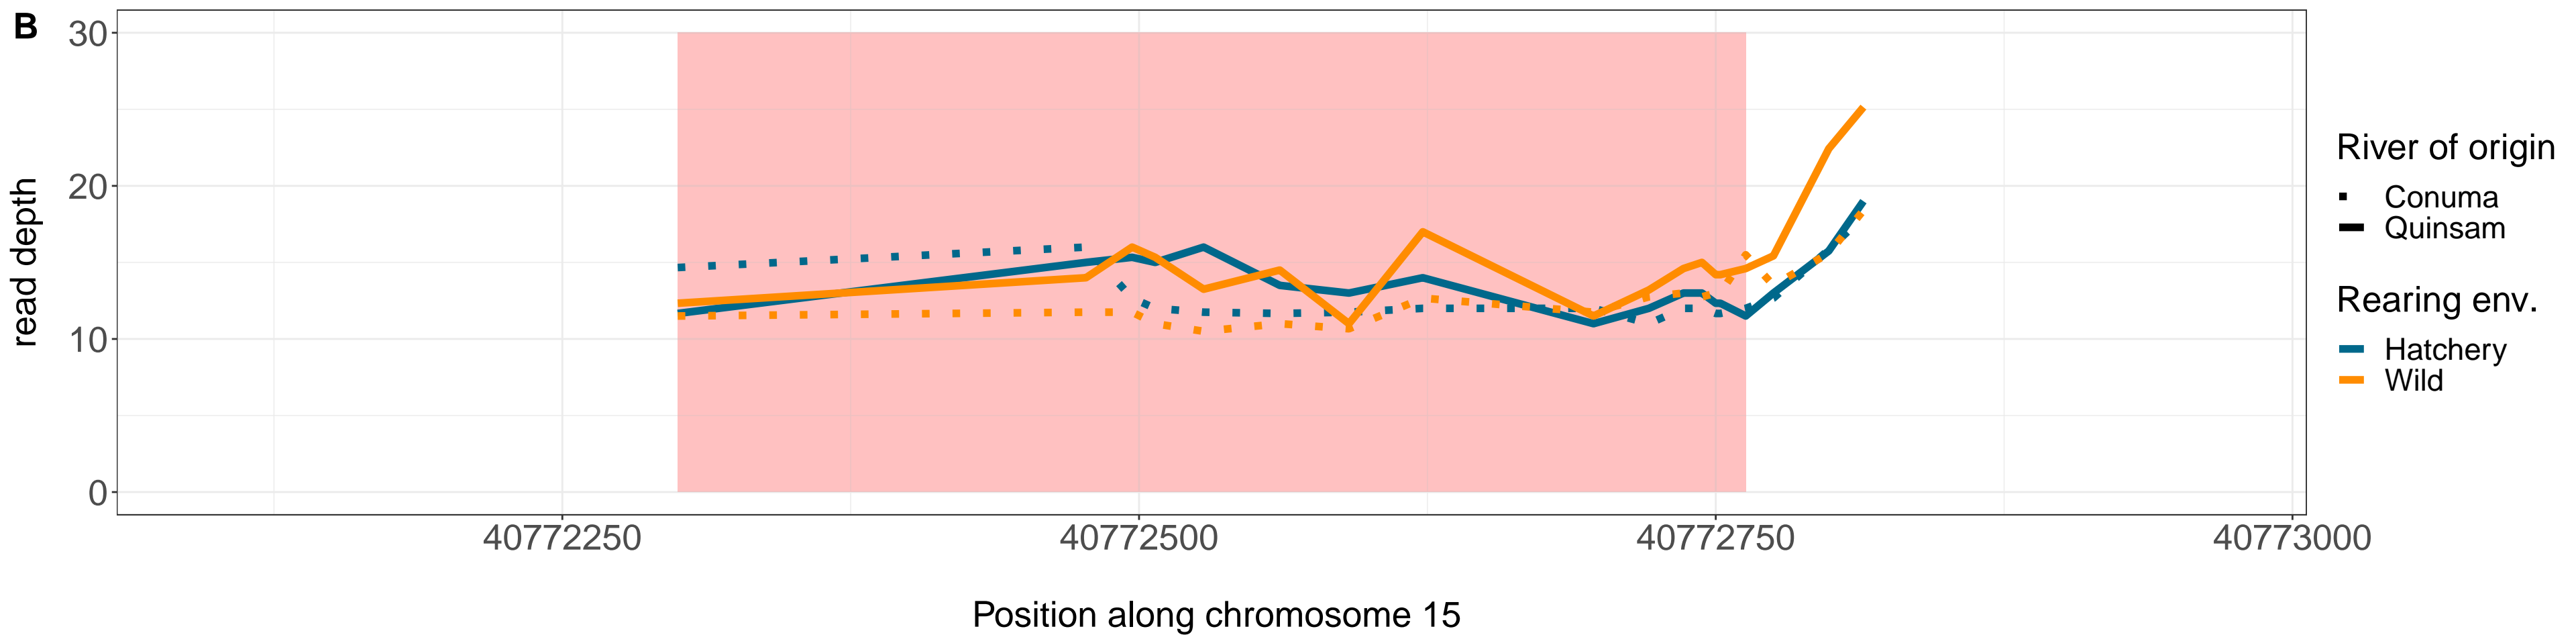

**A**

DMR\_64

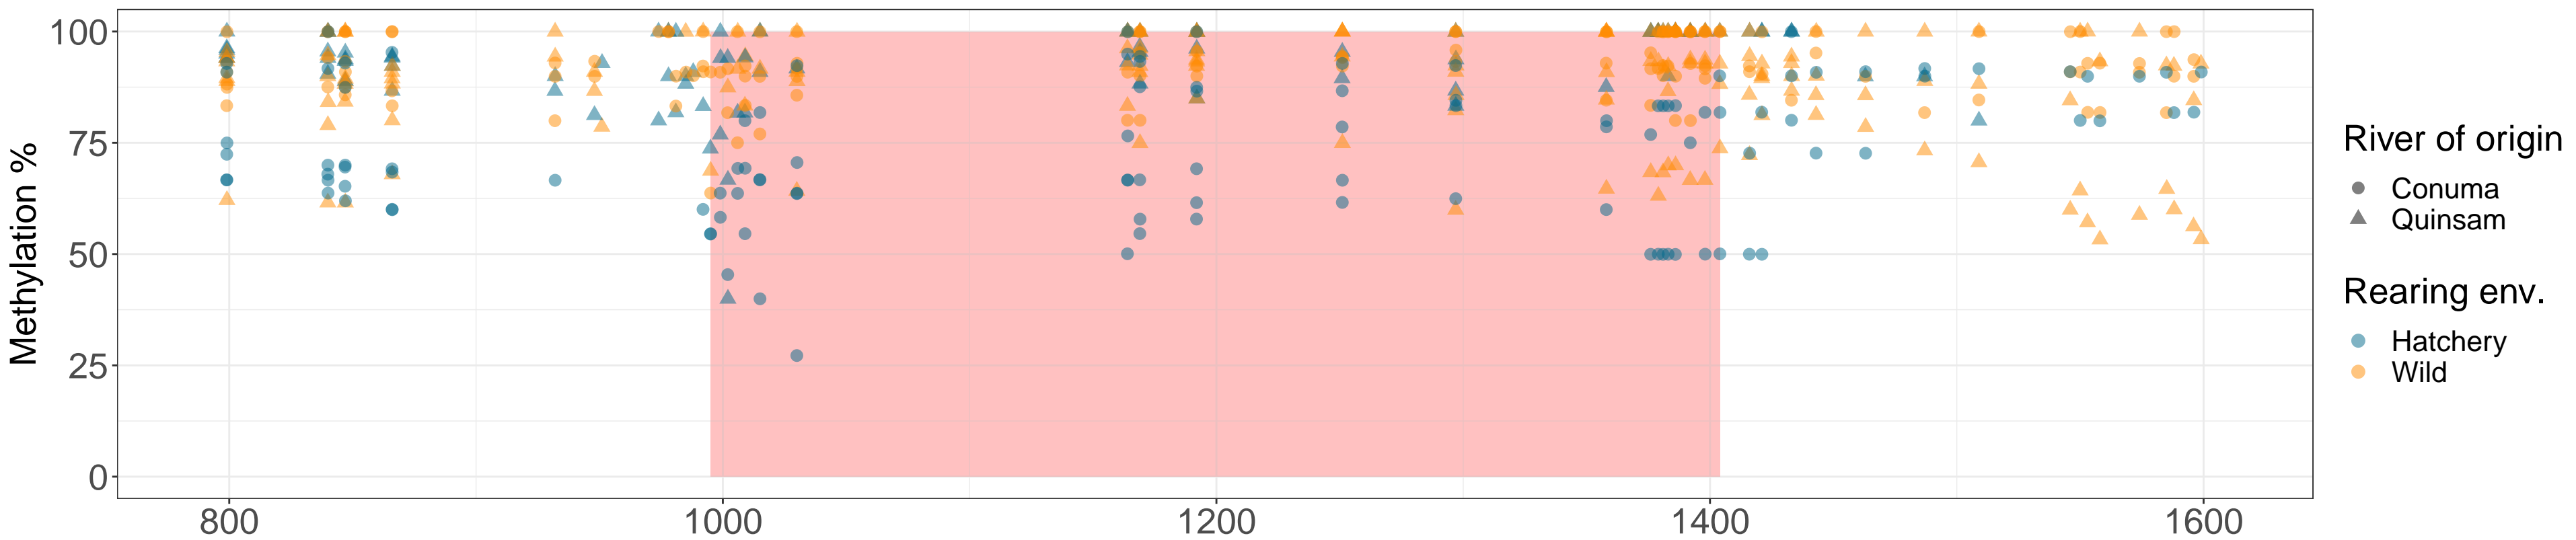**B**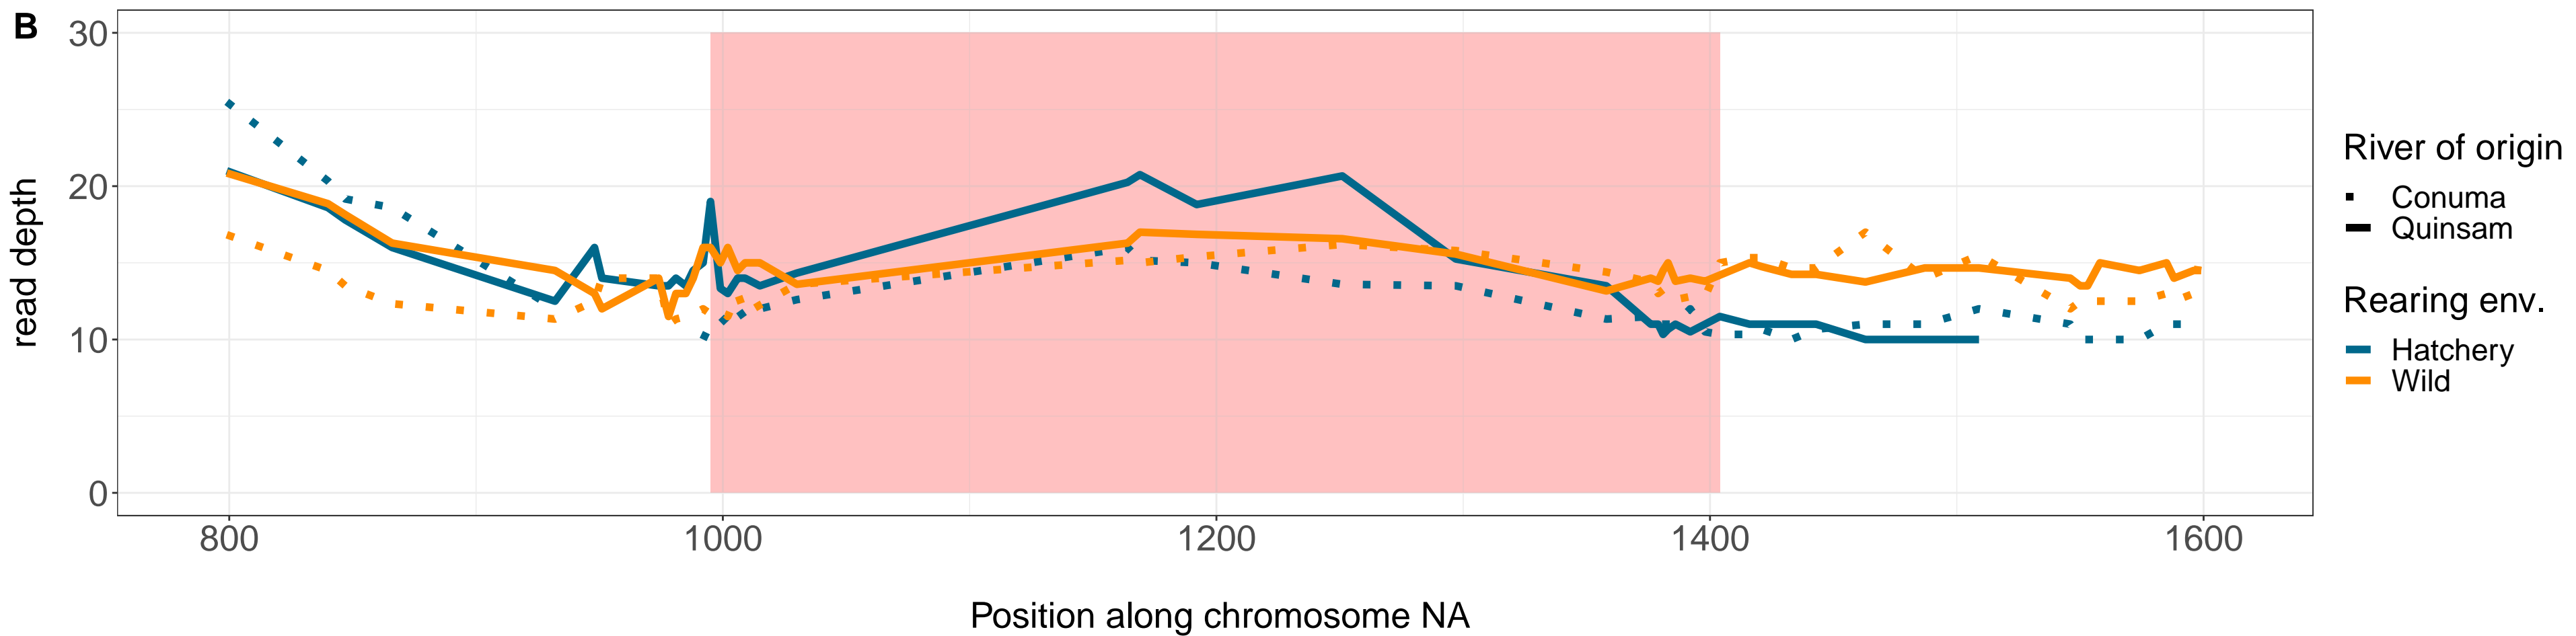

# DMR\_65

XM\_020497407.1

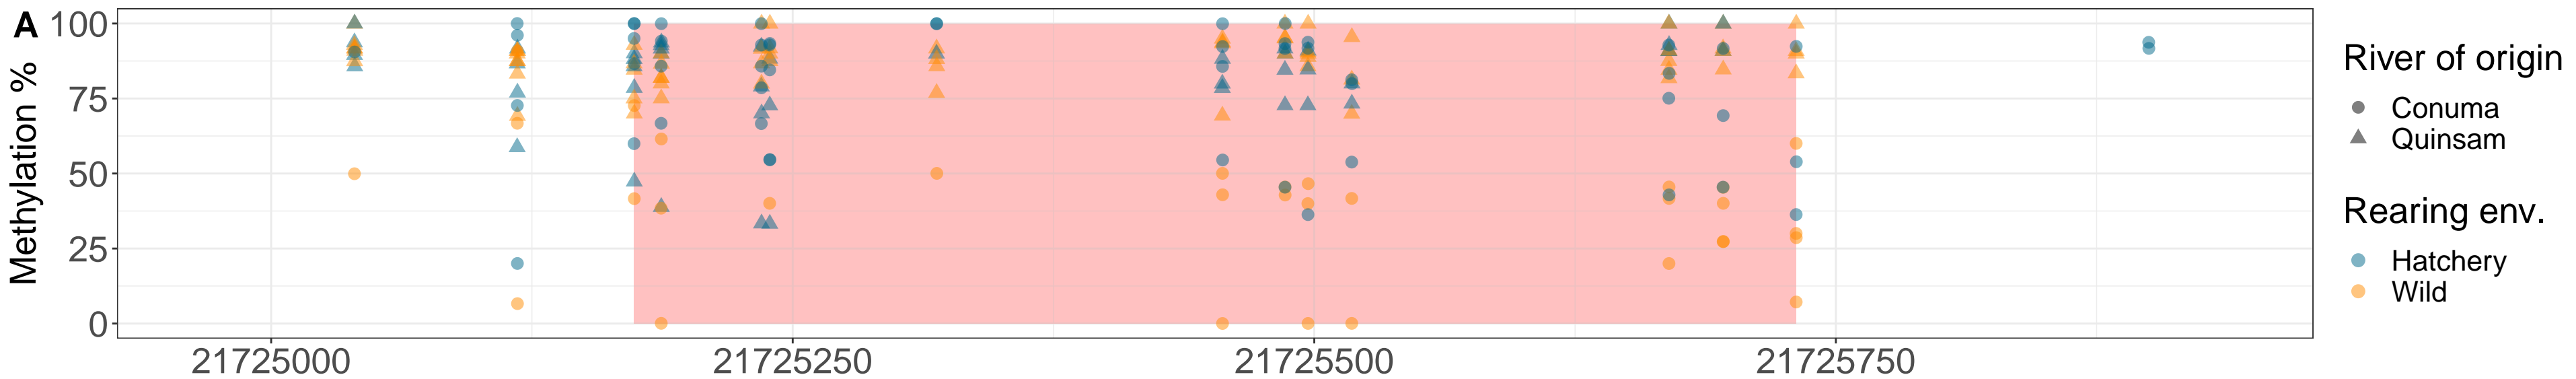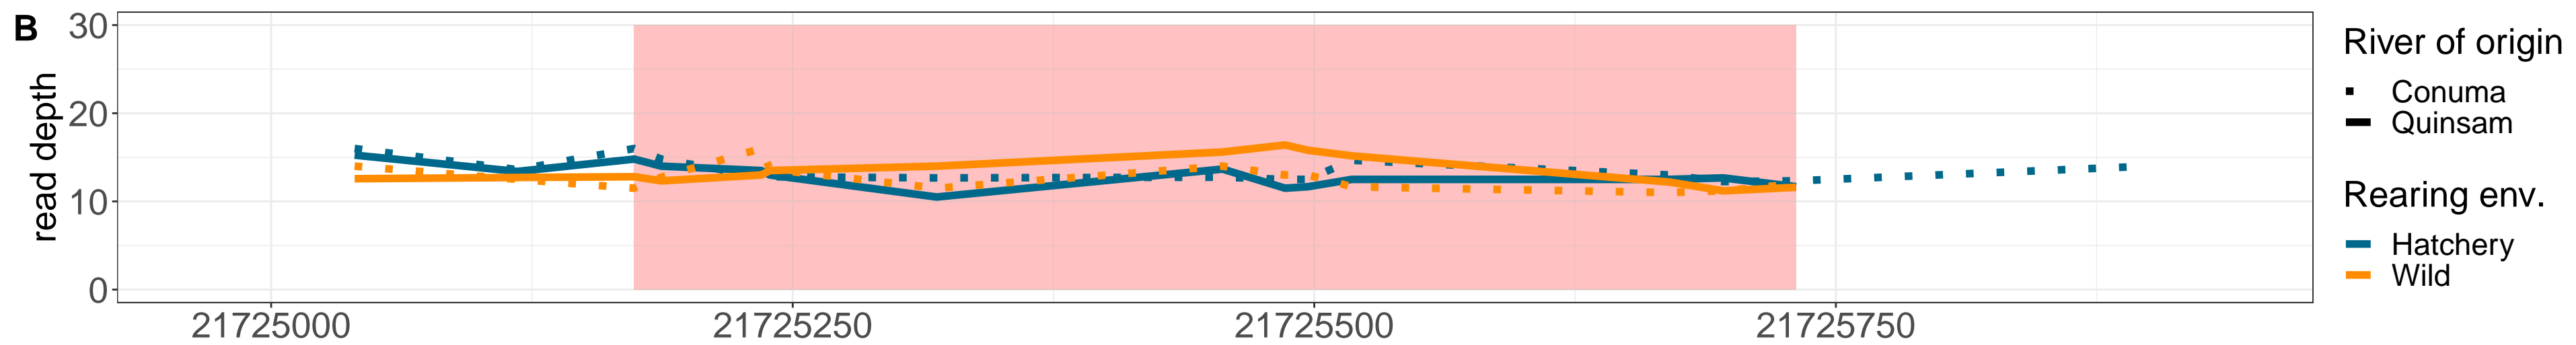

Position along chromosome 12



**A**

## DMR\_66

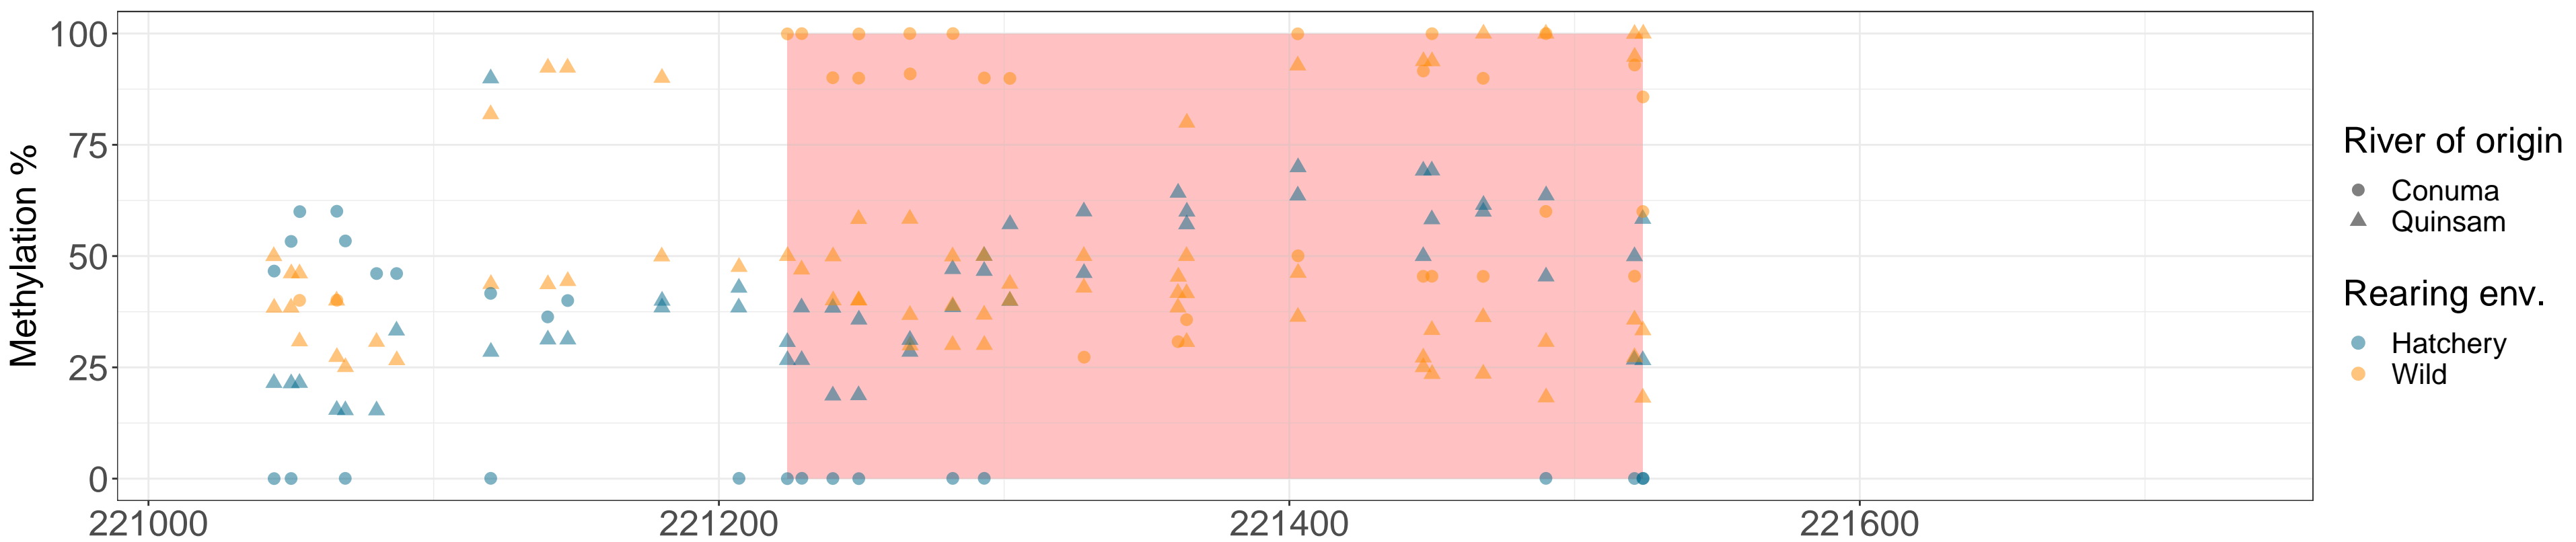**B**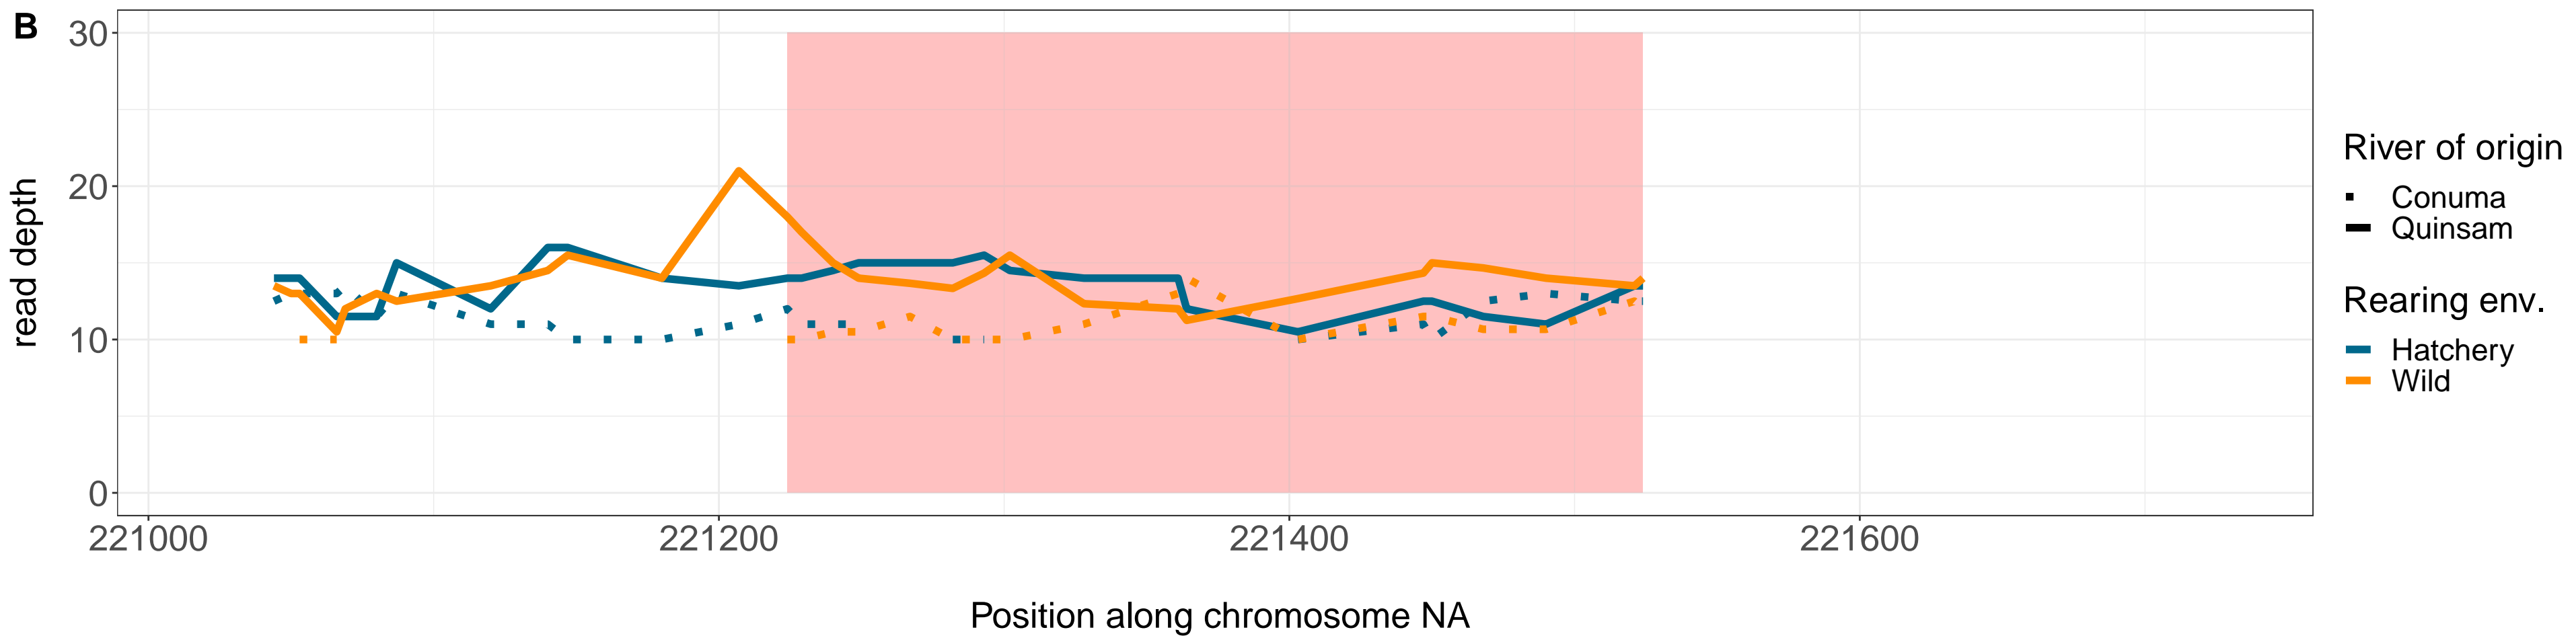

**A**

## DMR\_67

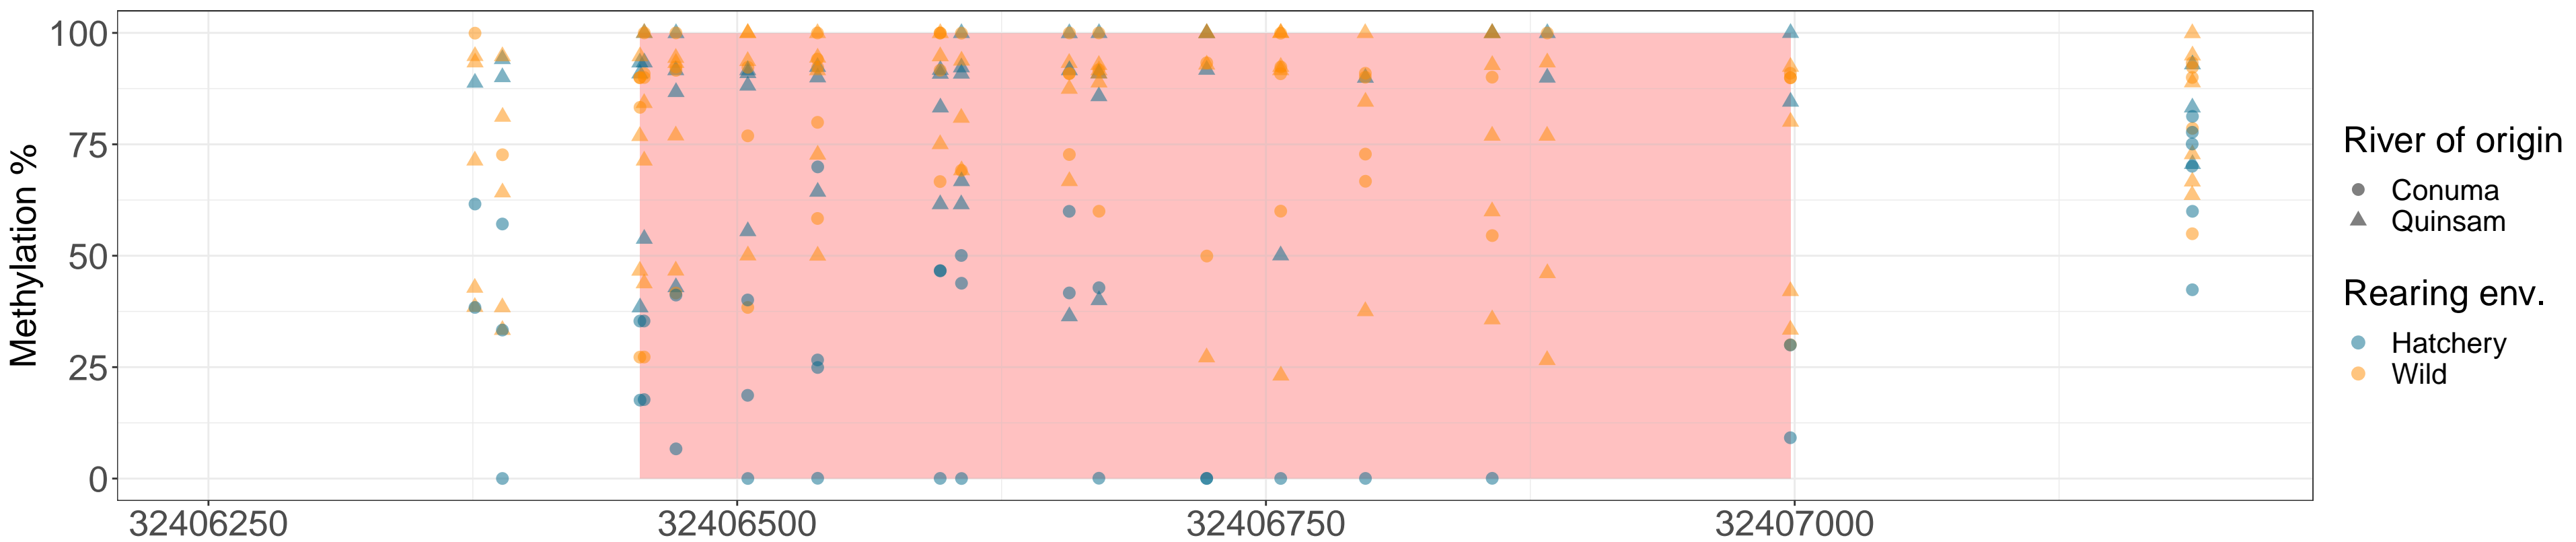**B**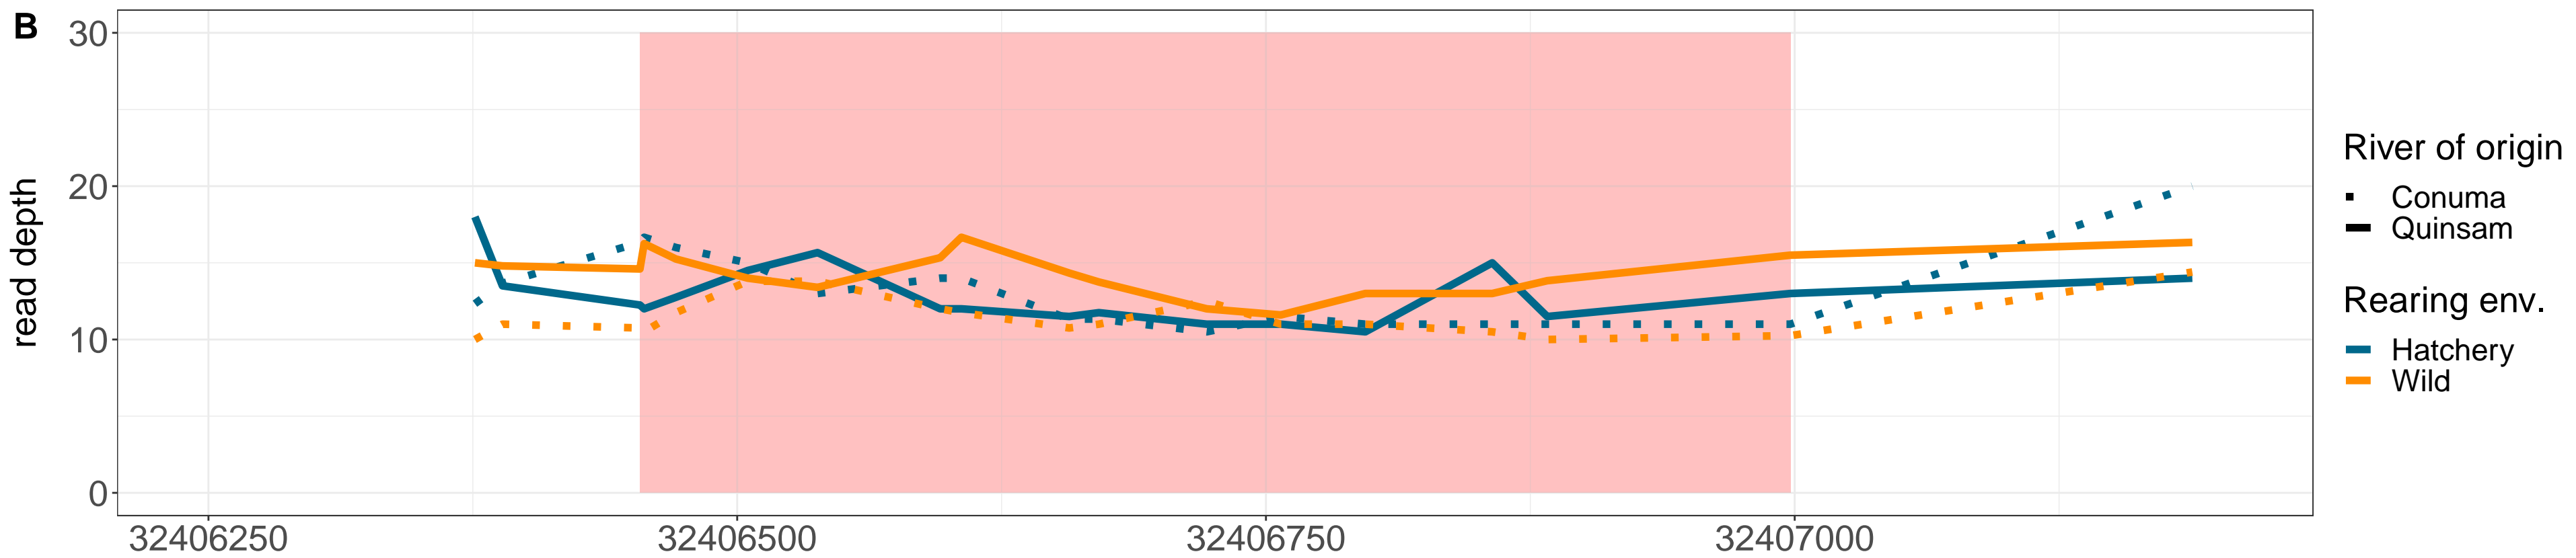

Position along chromosome 13

**A**

## DMR\_68

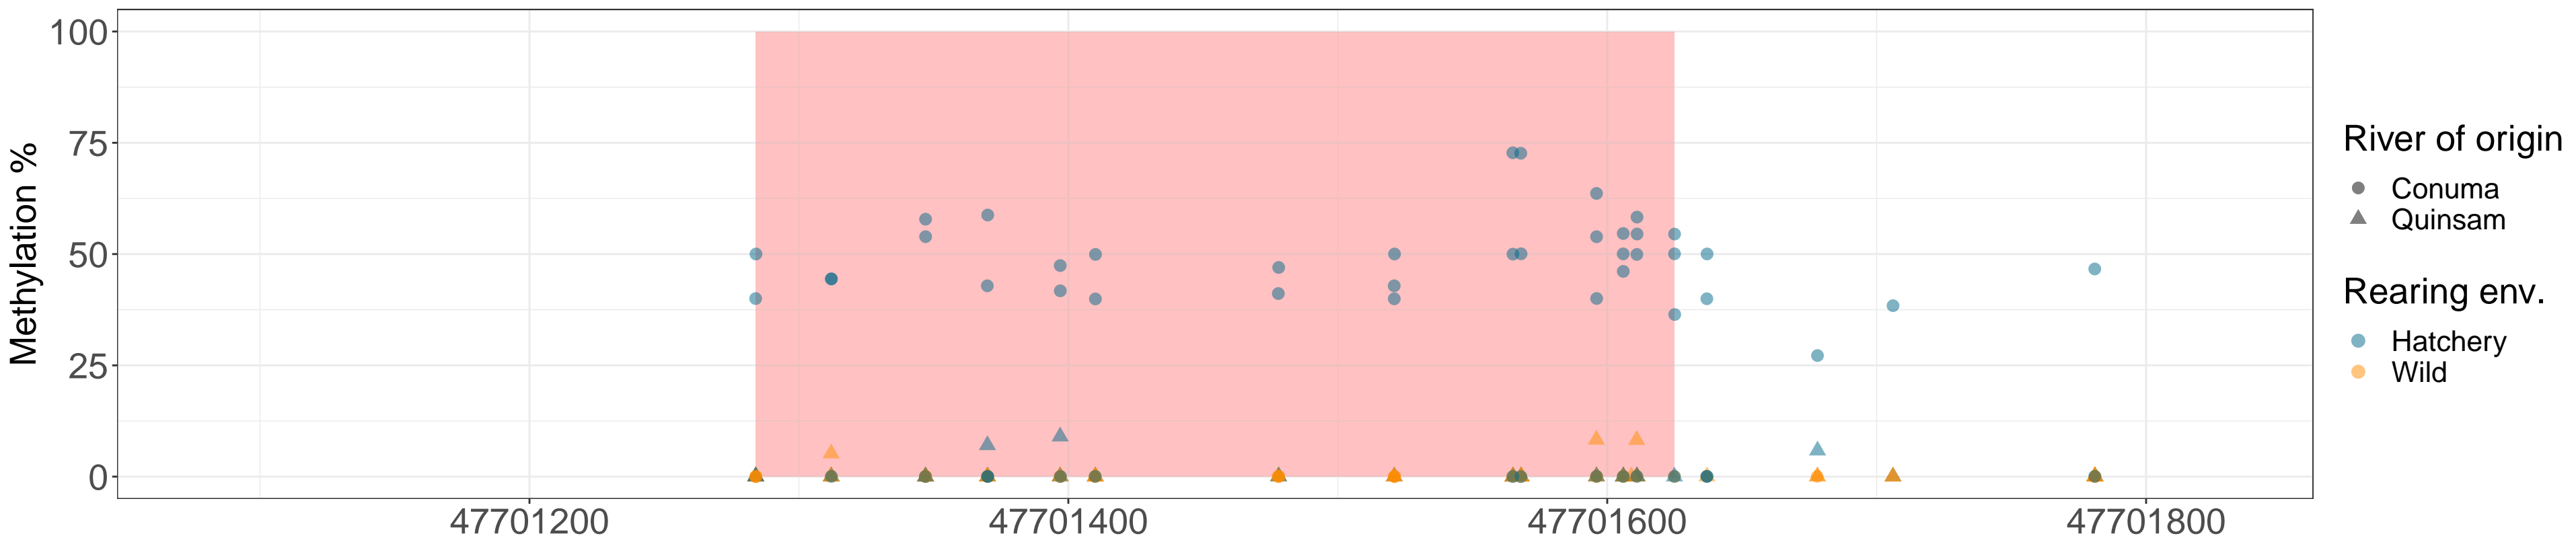**B**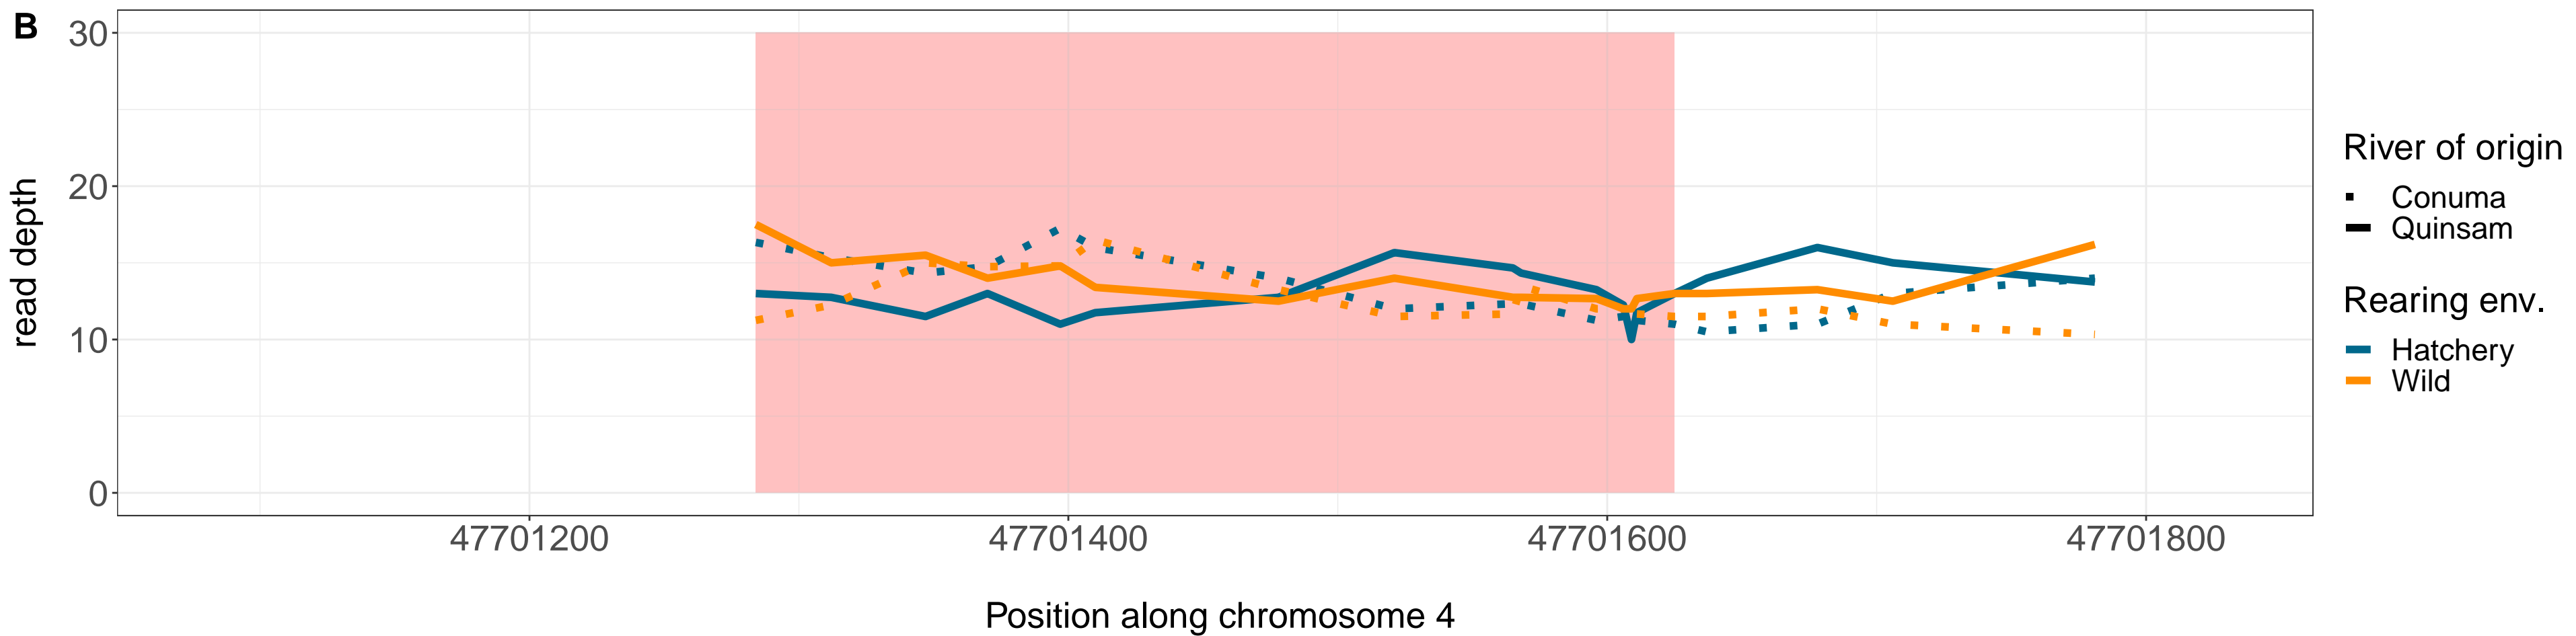

# DMR\_69

XM\_020484051.1

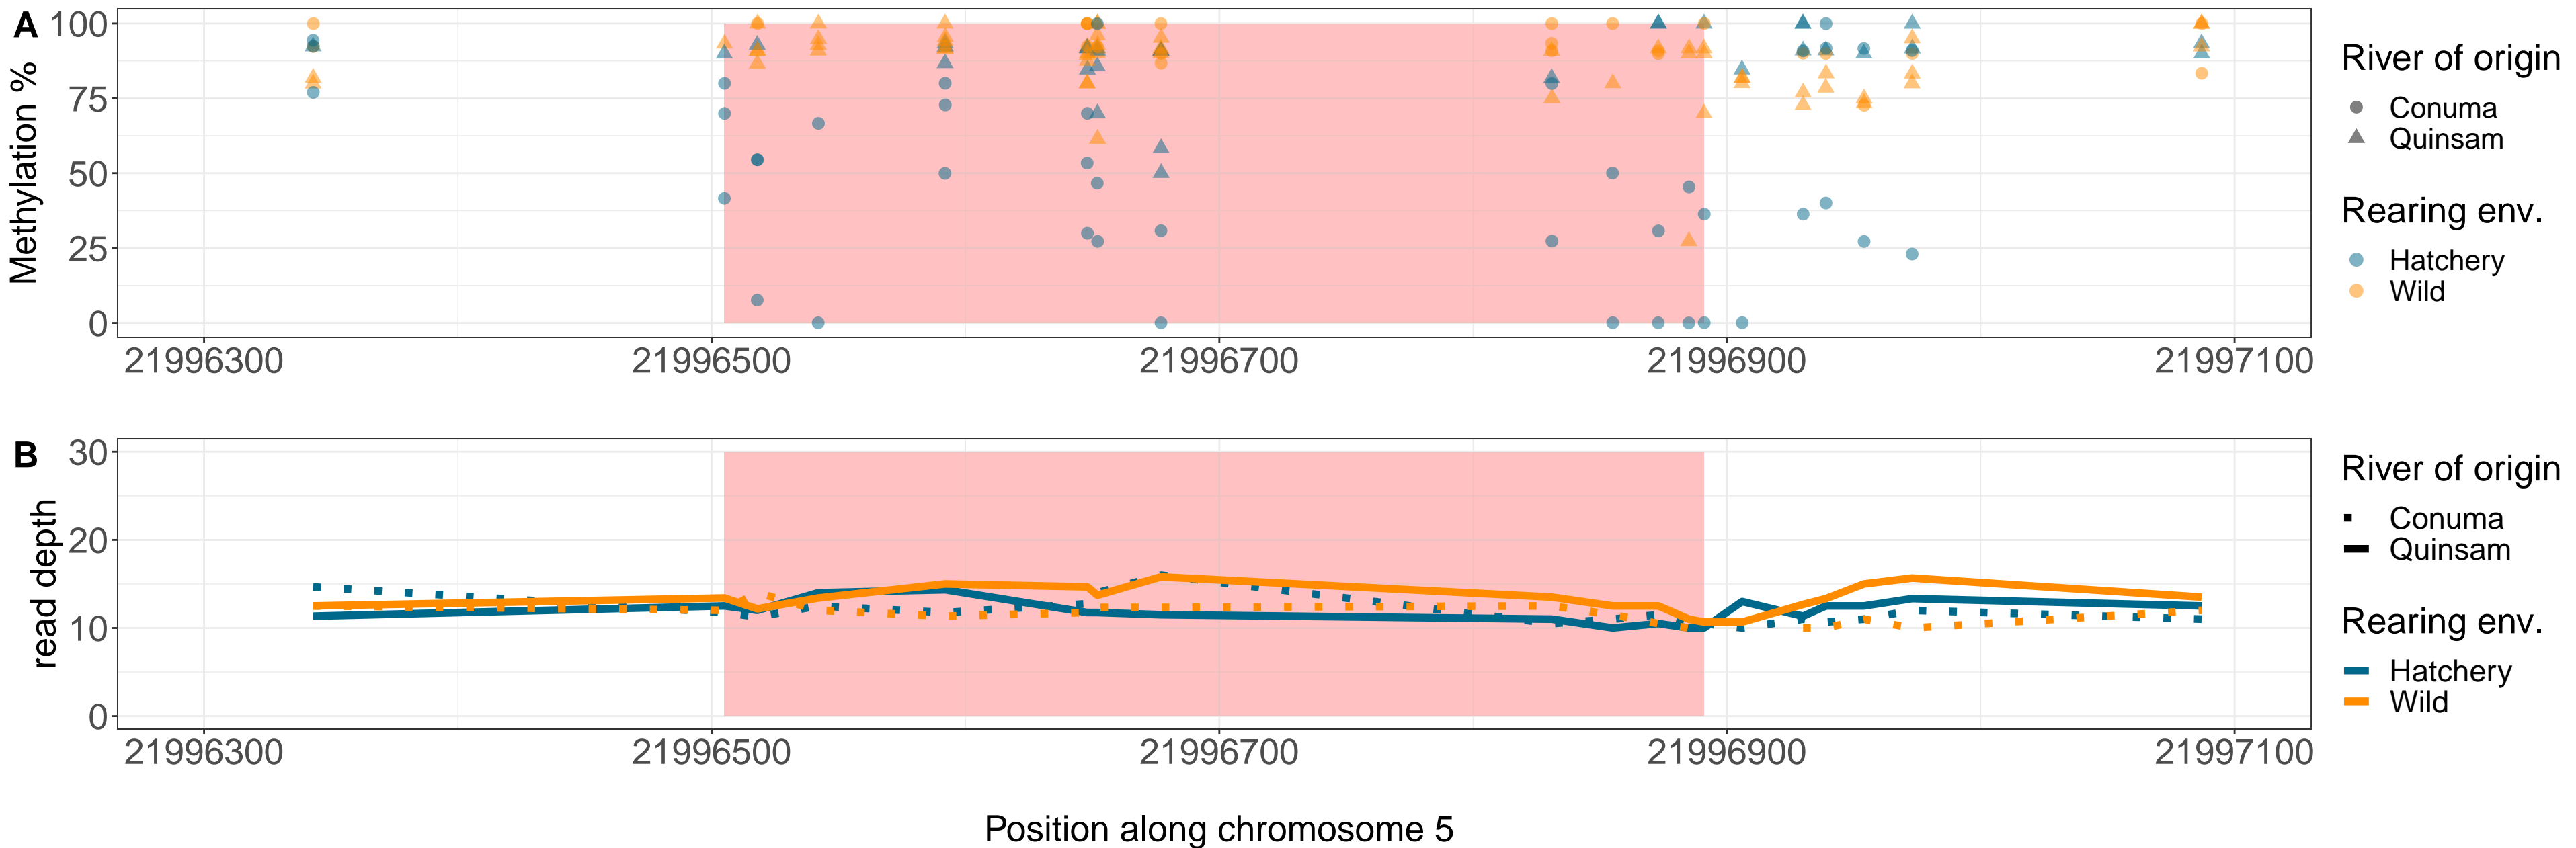

**A**

## DMR\_70

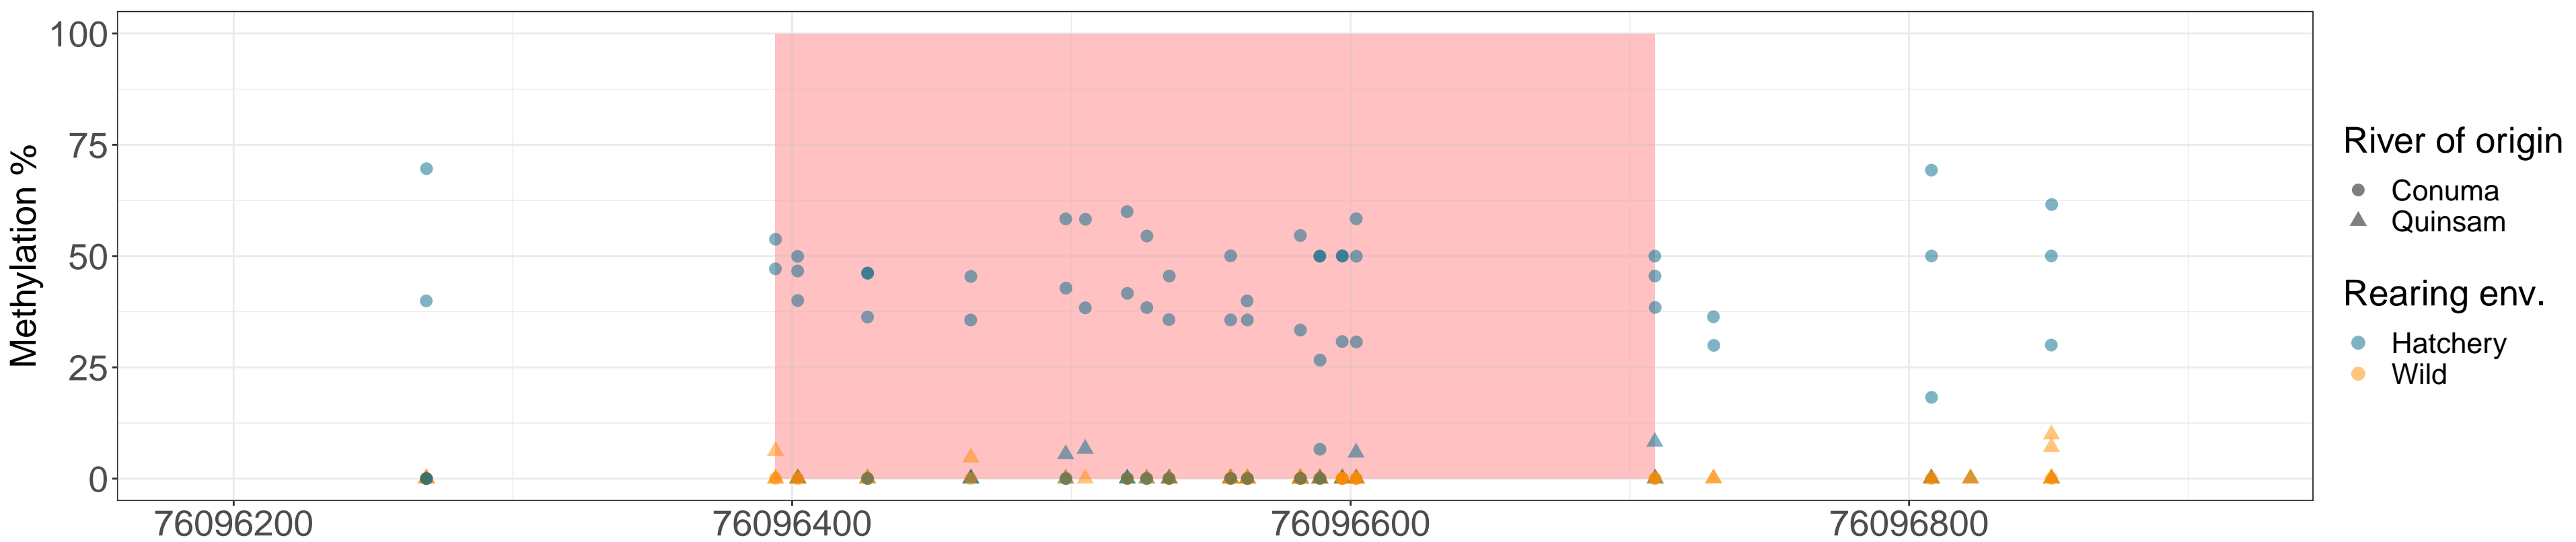**B**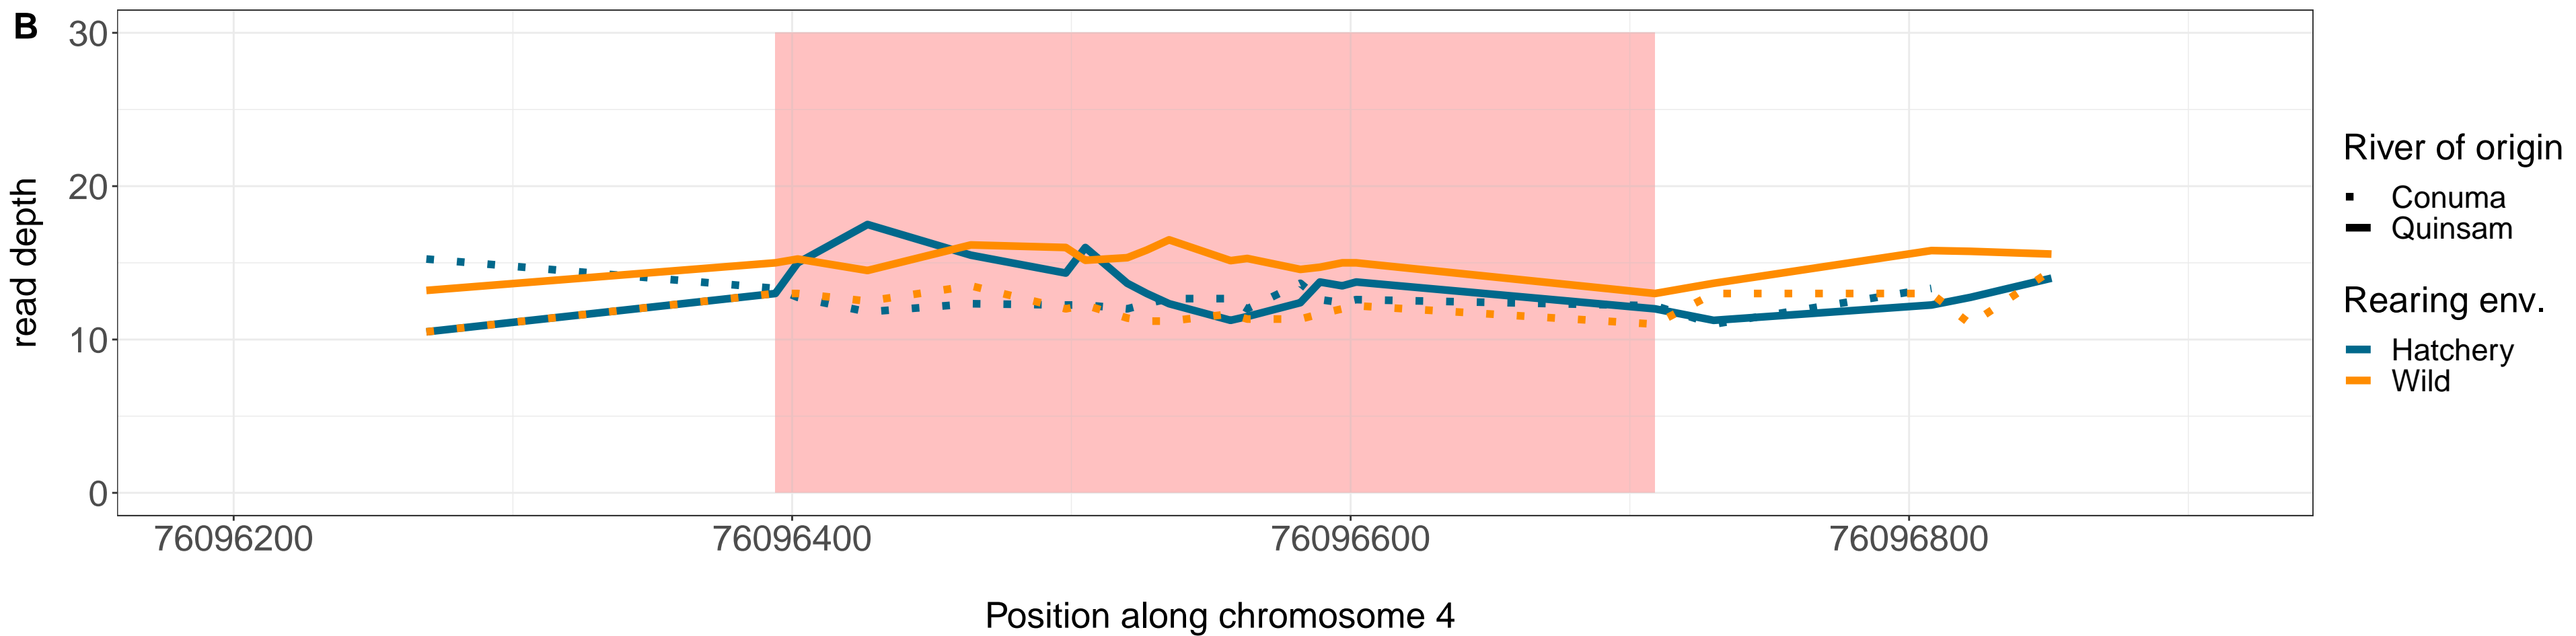

# DMR\_71

**A**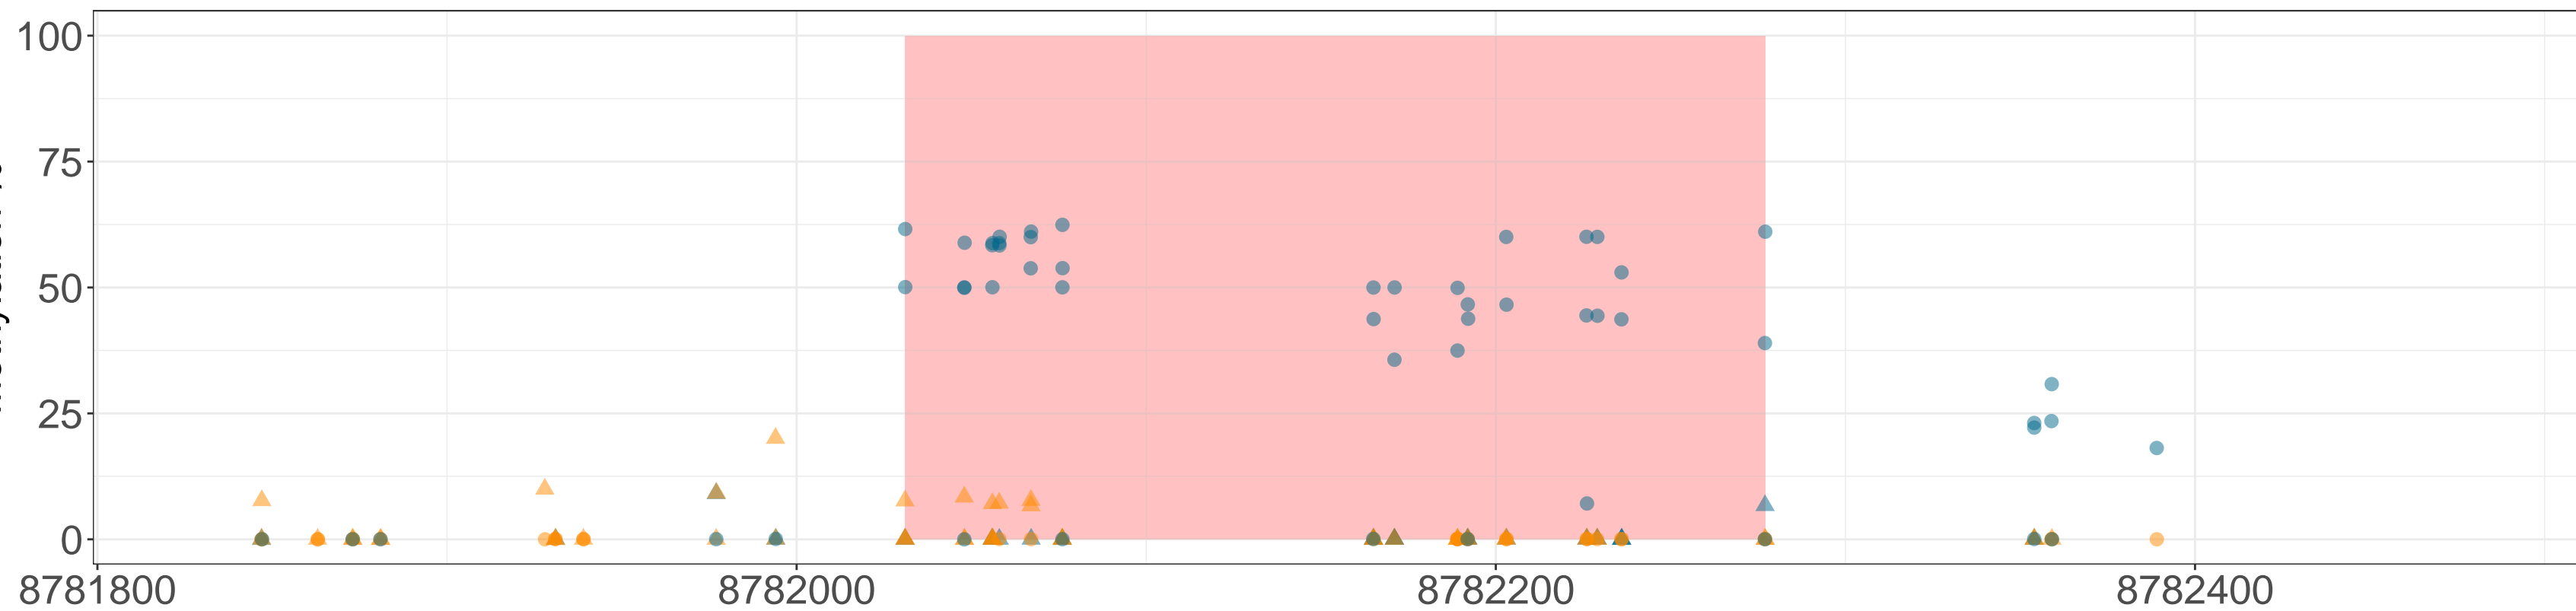**River of origin**

- Conuma
- ▲ Quinsam

**Rearing env.**

- Hatchery
- Wild

**B**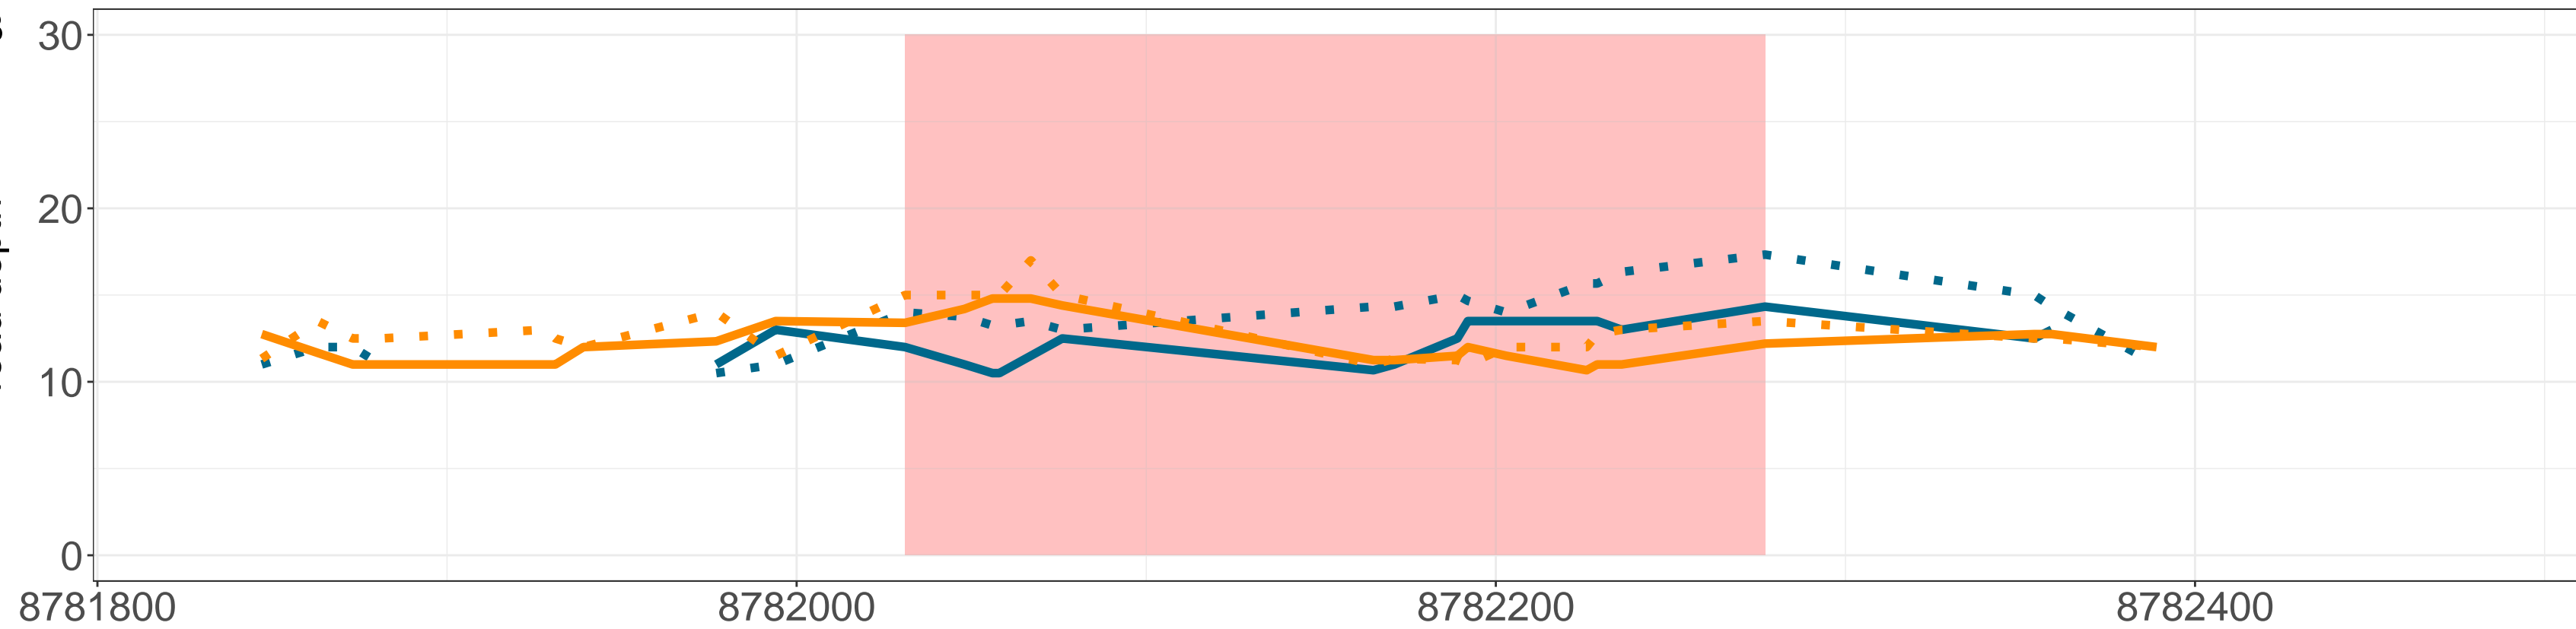**River of origin**

- Conuma
- Quinsam

**Rearing env.**

- Hatchery
- Wild

Position along chromosome 25

**A**

## DMR\_73

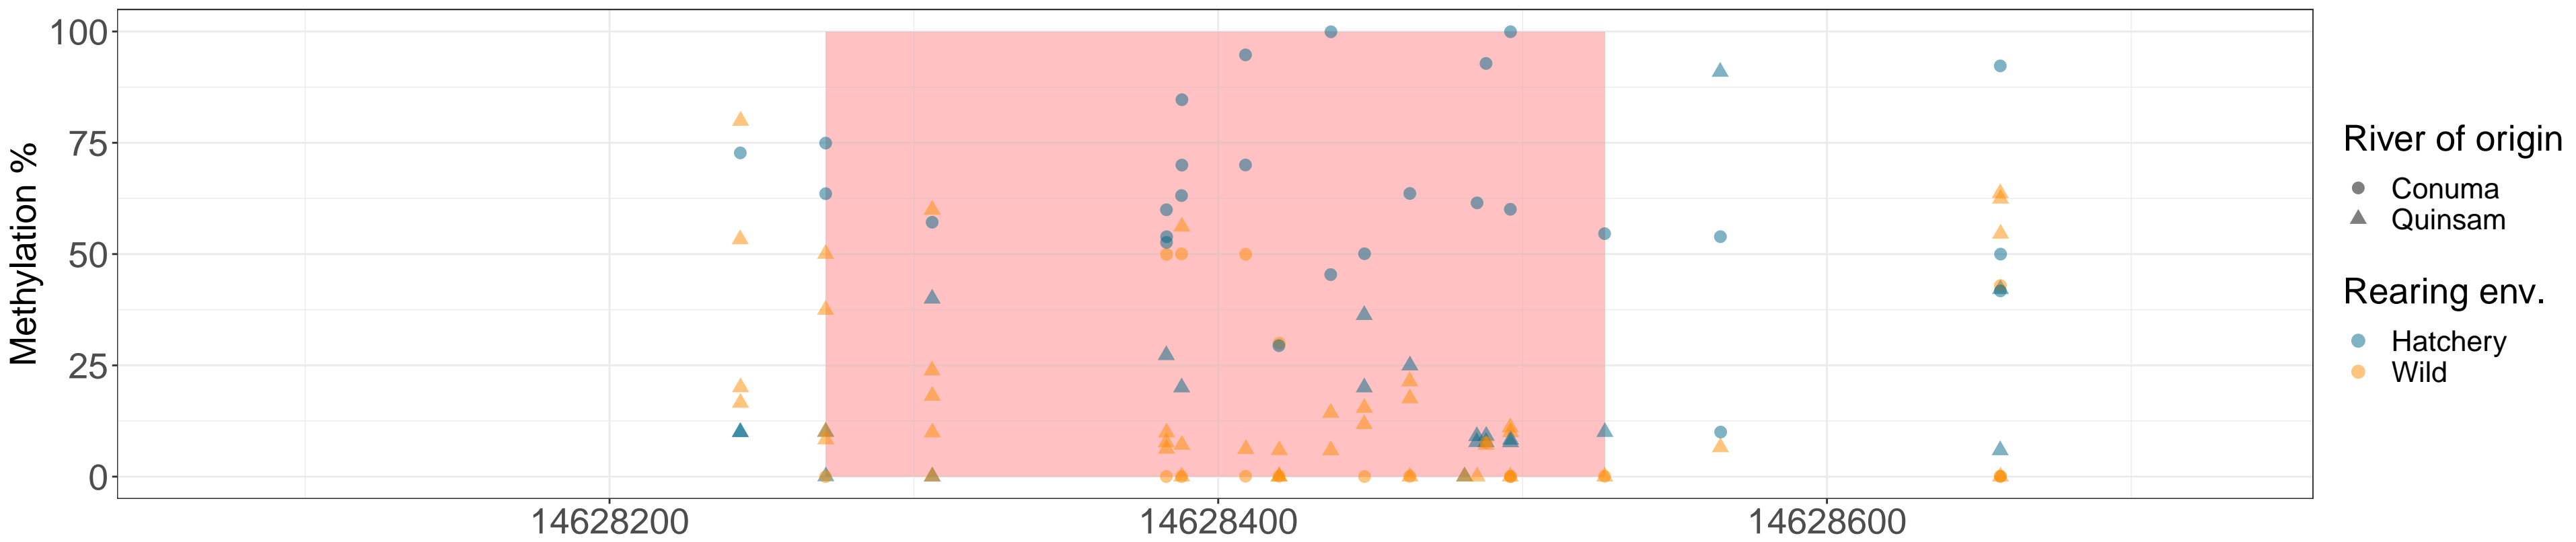**B**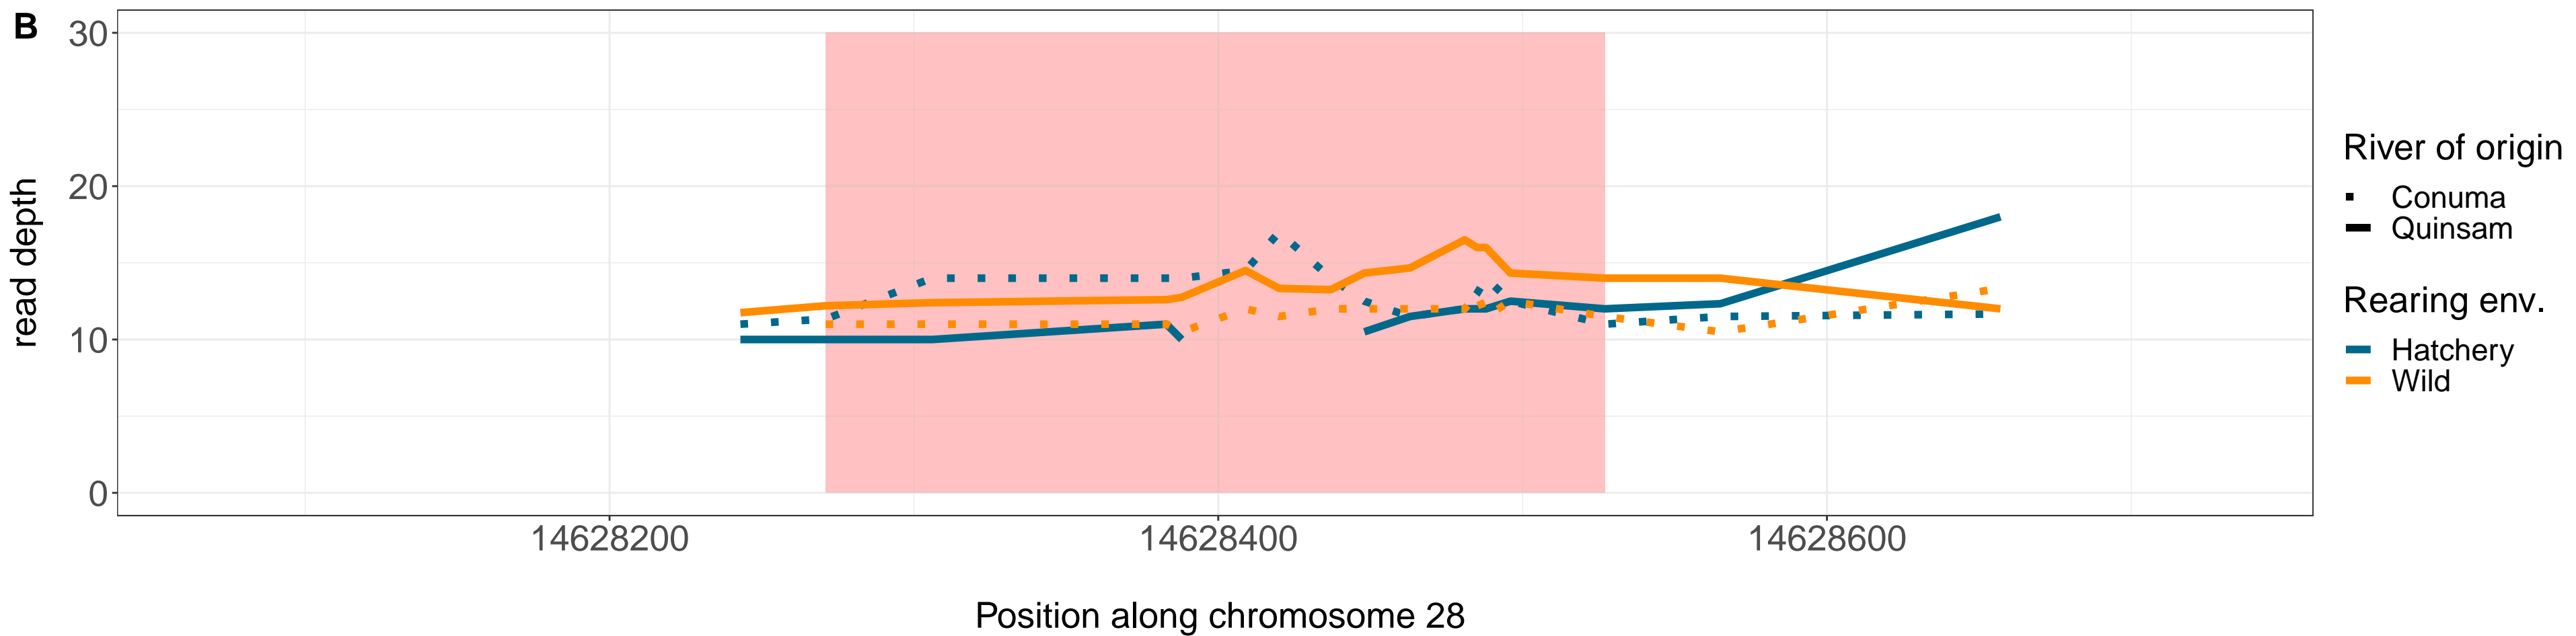

**A**

DMR\_74

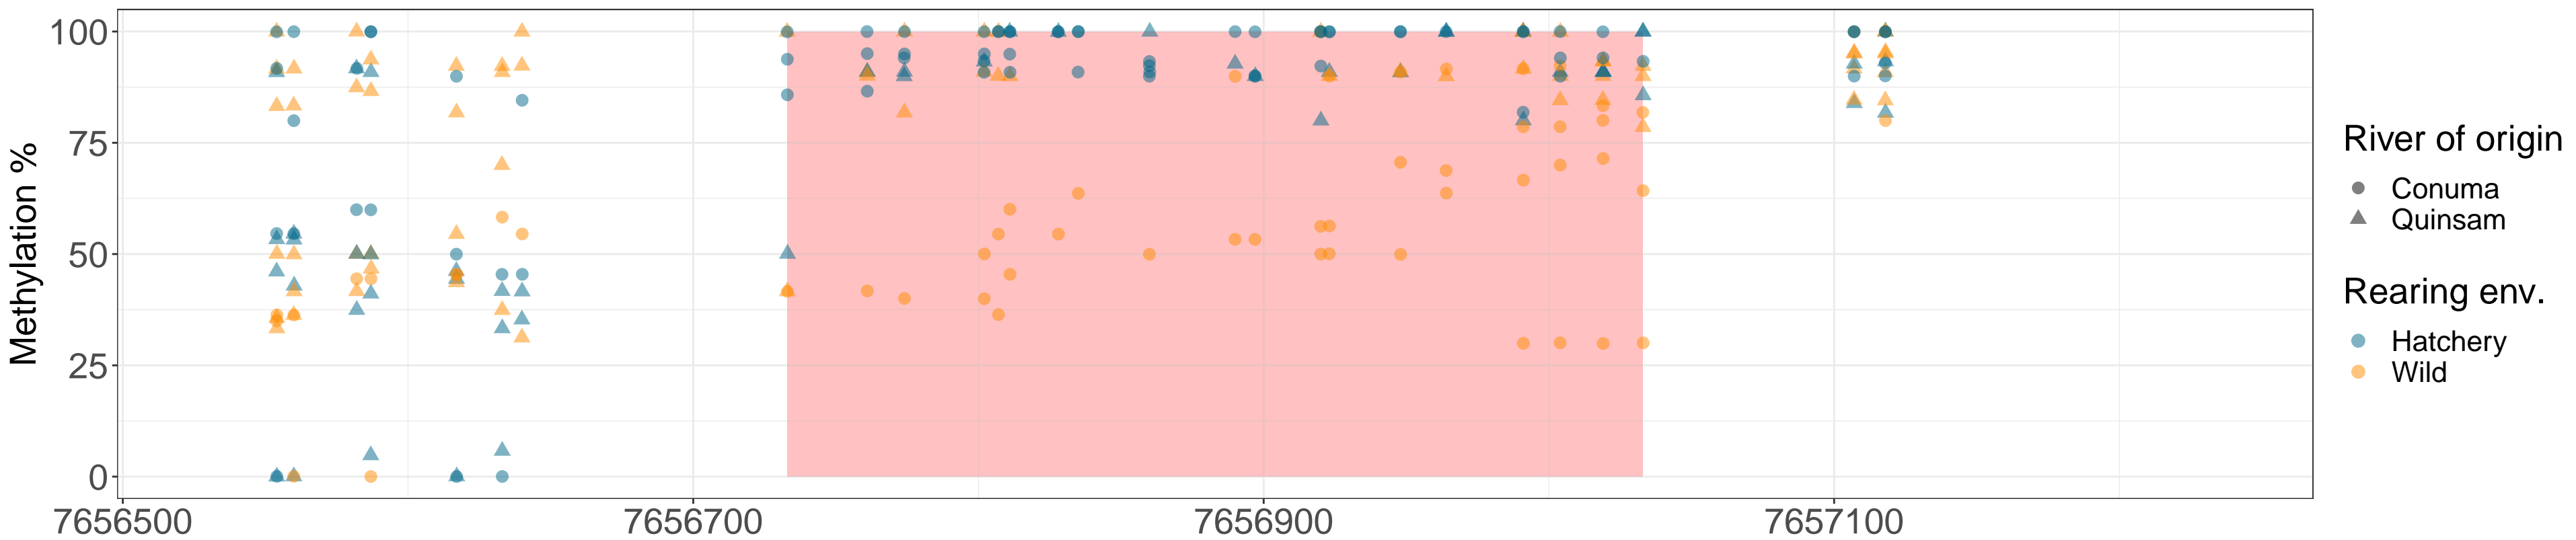**B**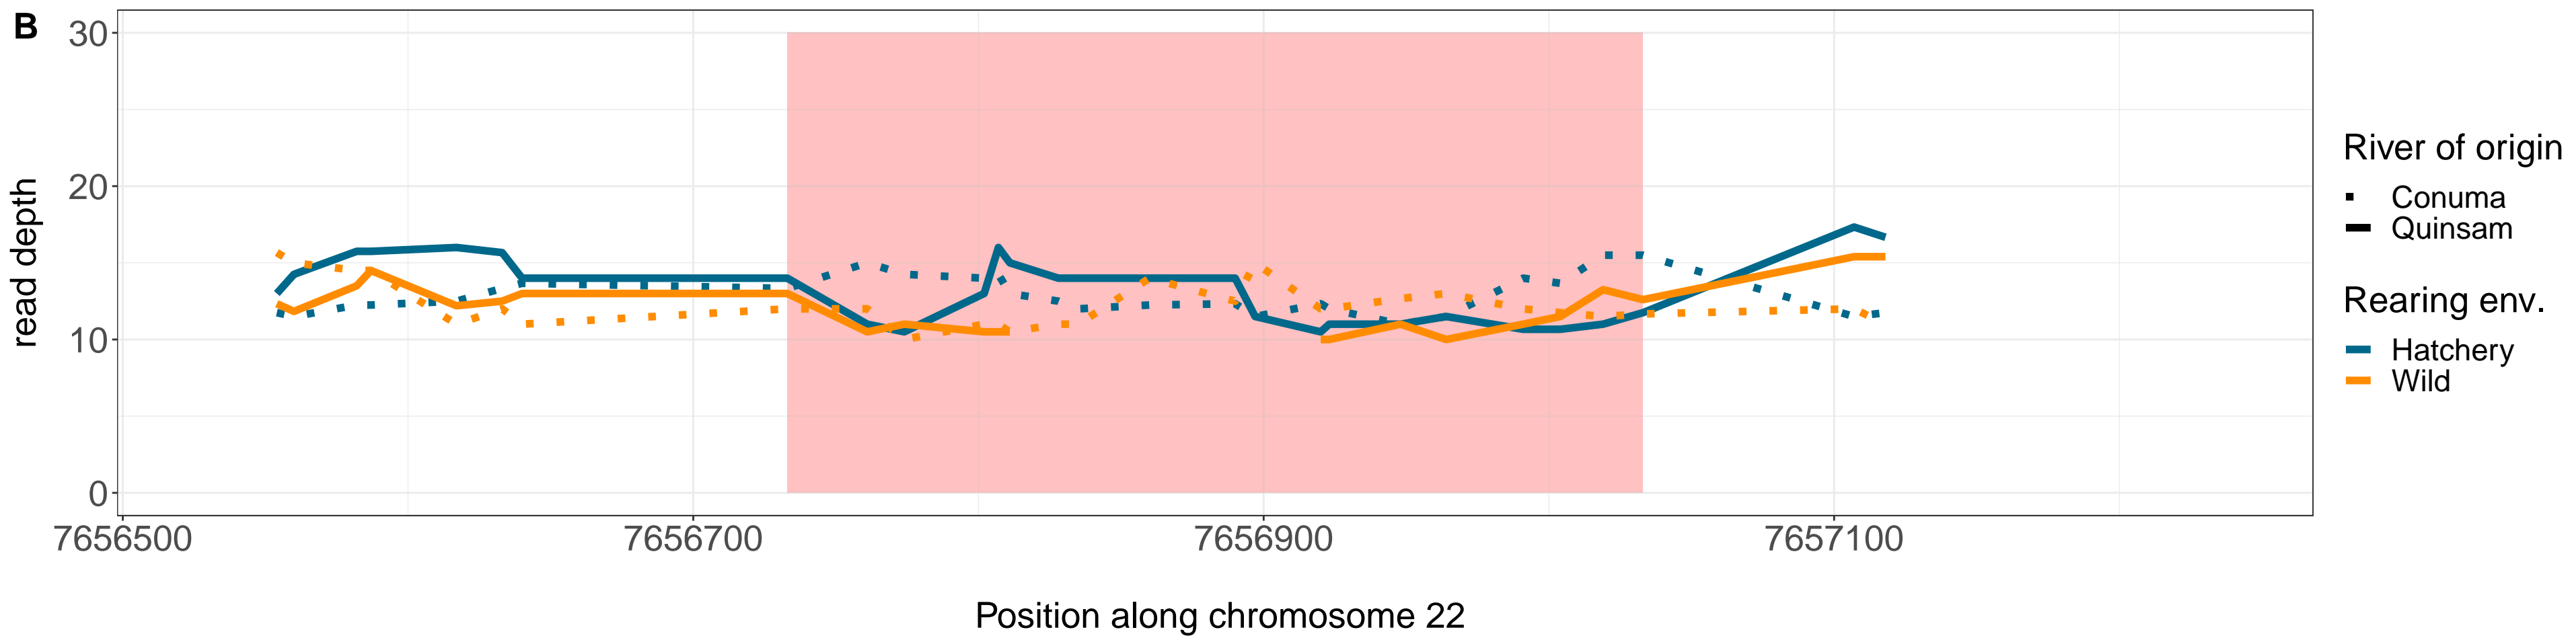



**A**

## DMR\_76

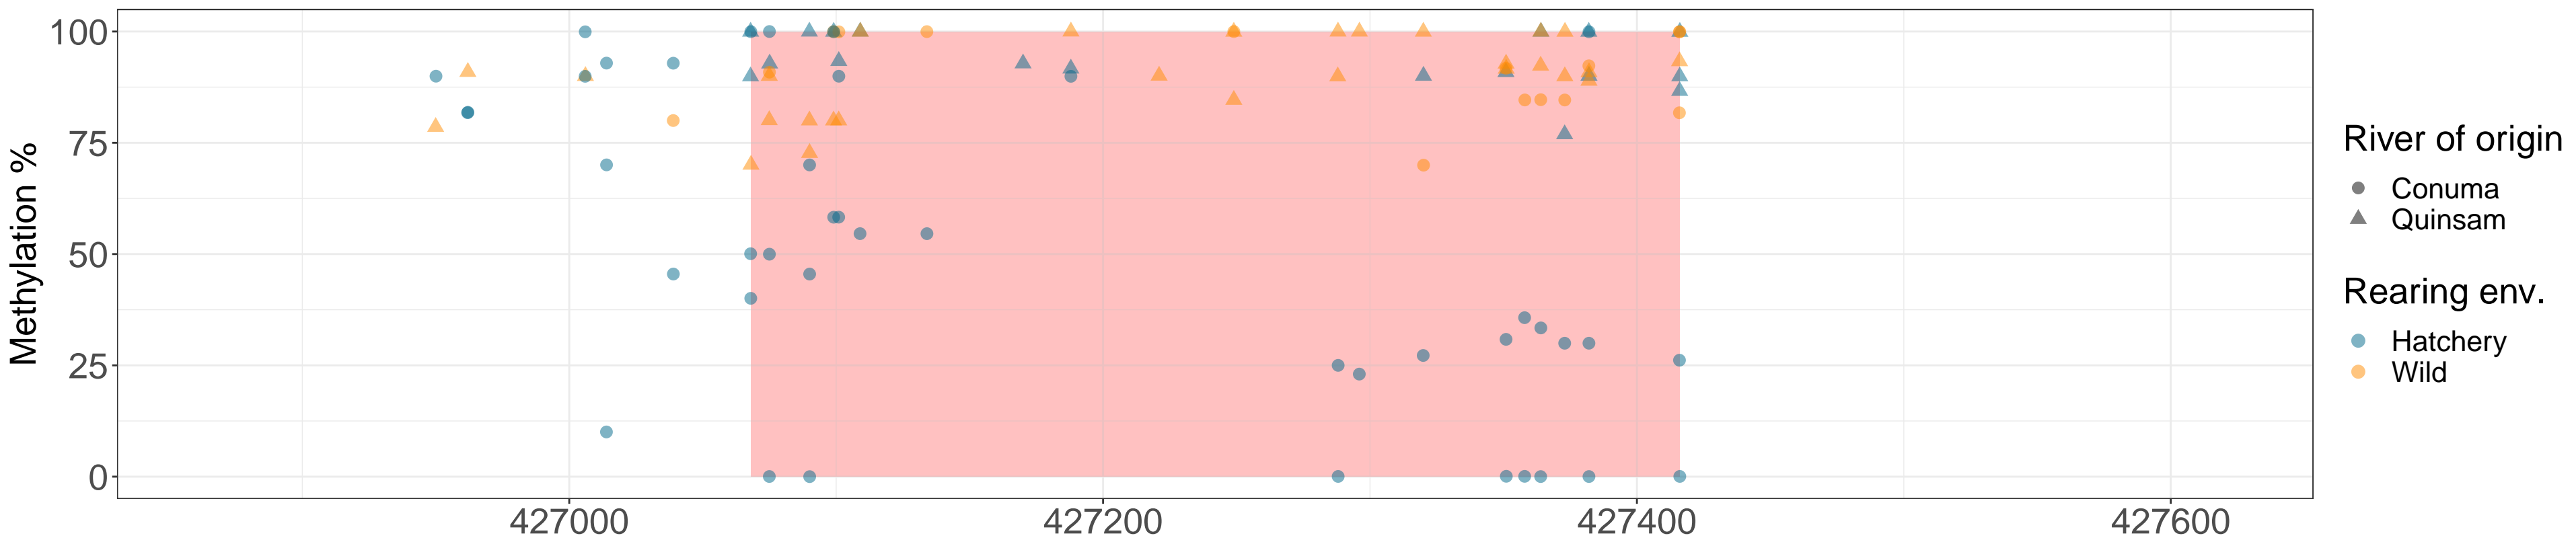**B**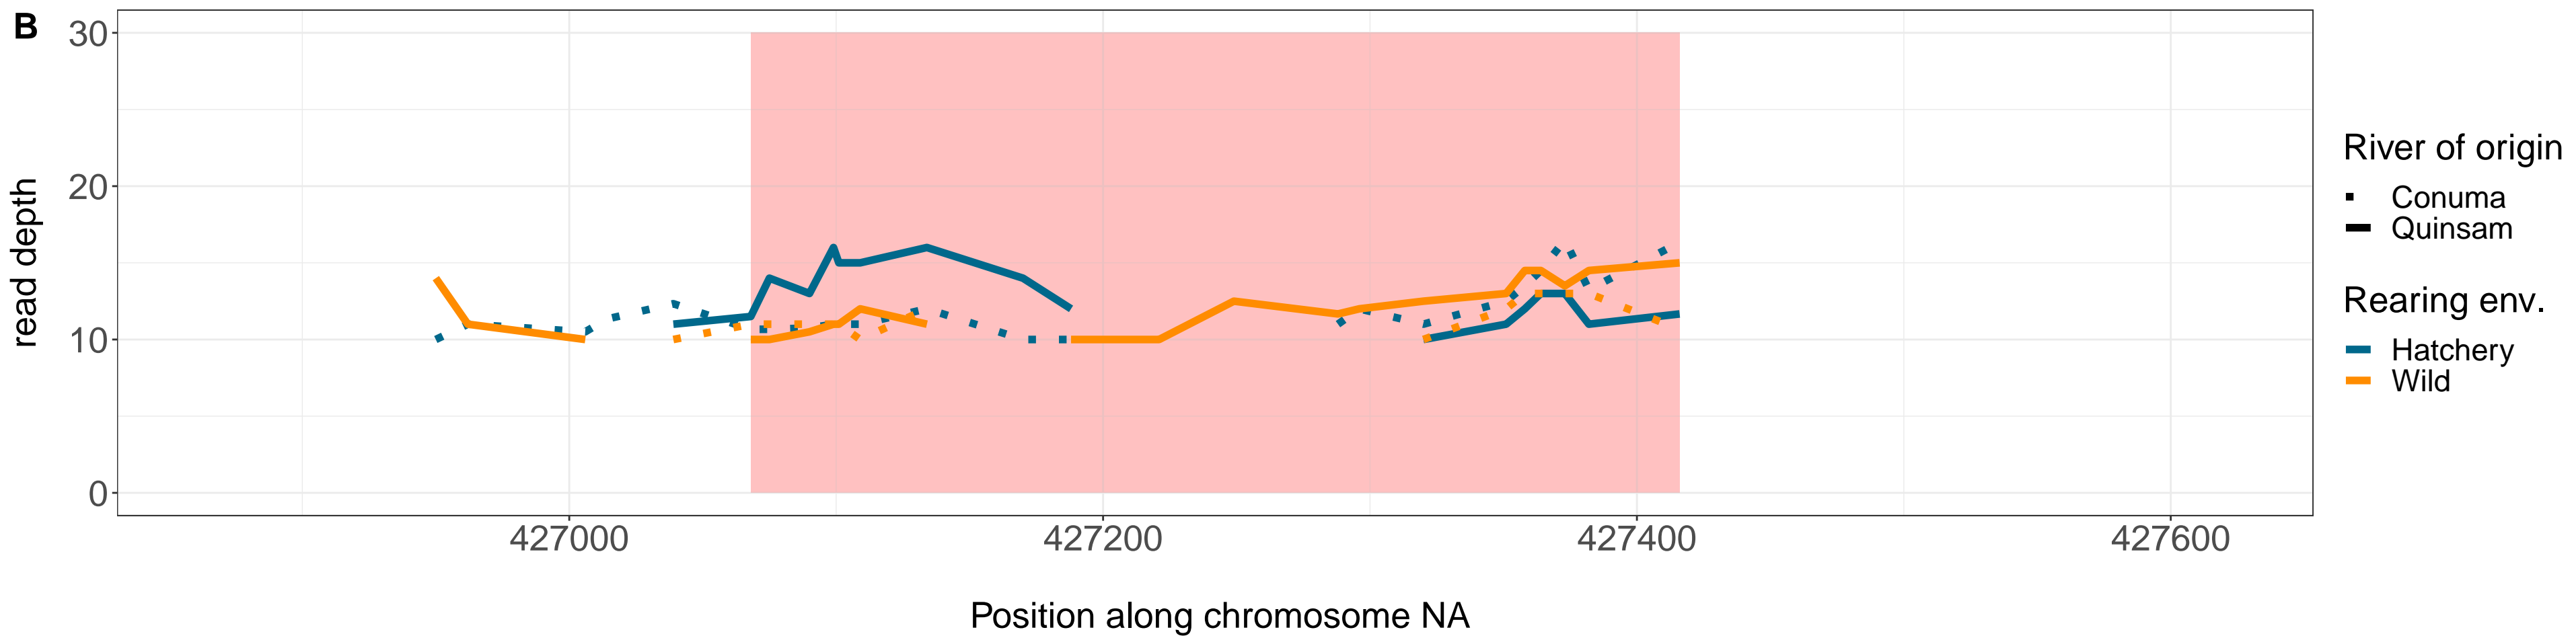

# DMR\_77

XM\_020461631.1

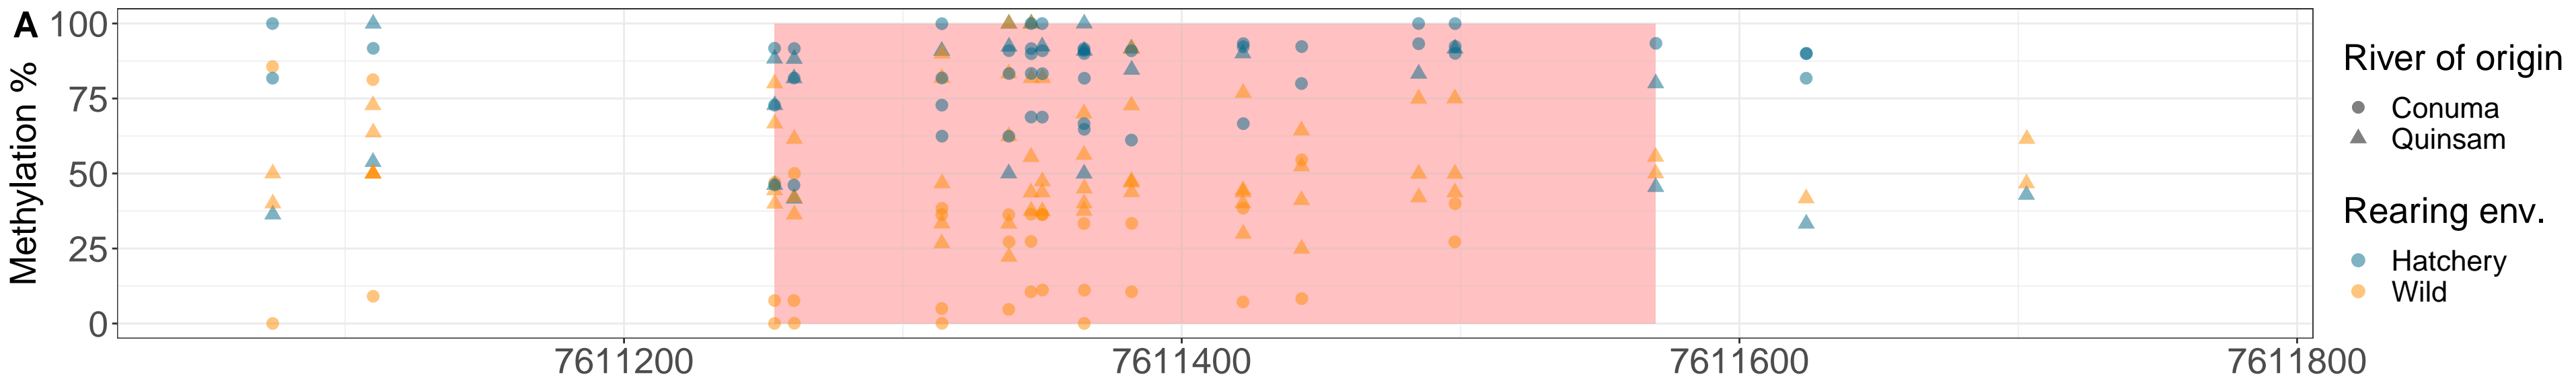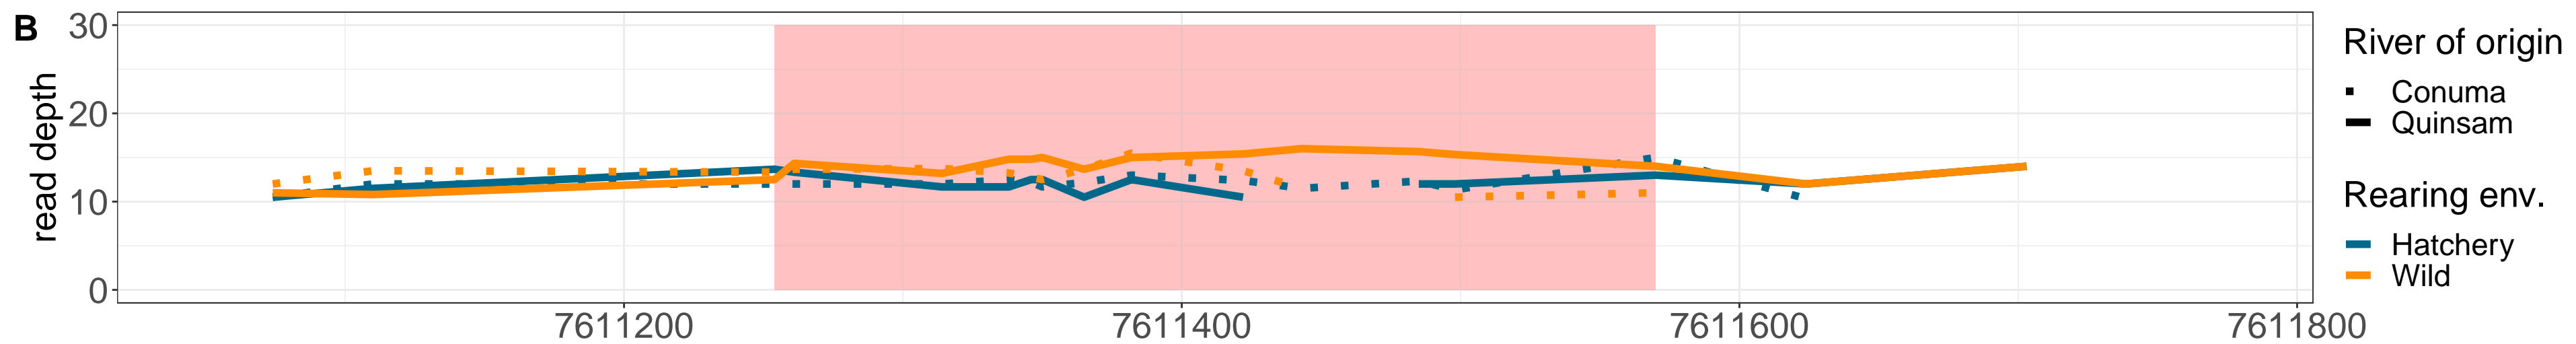

Position along chromosome 26

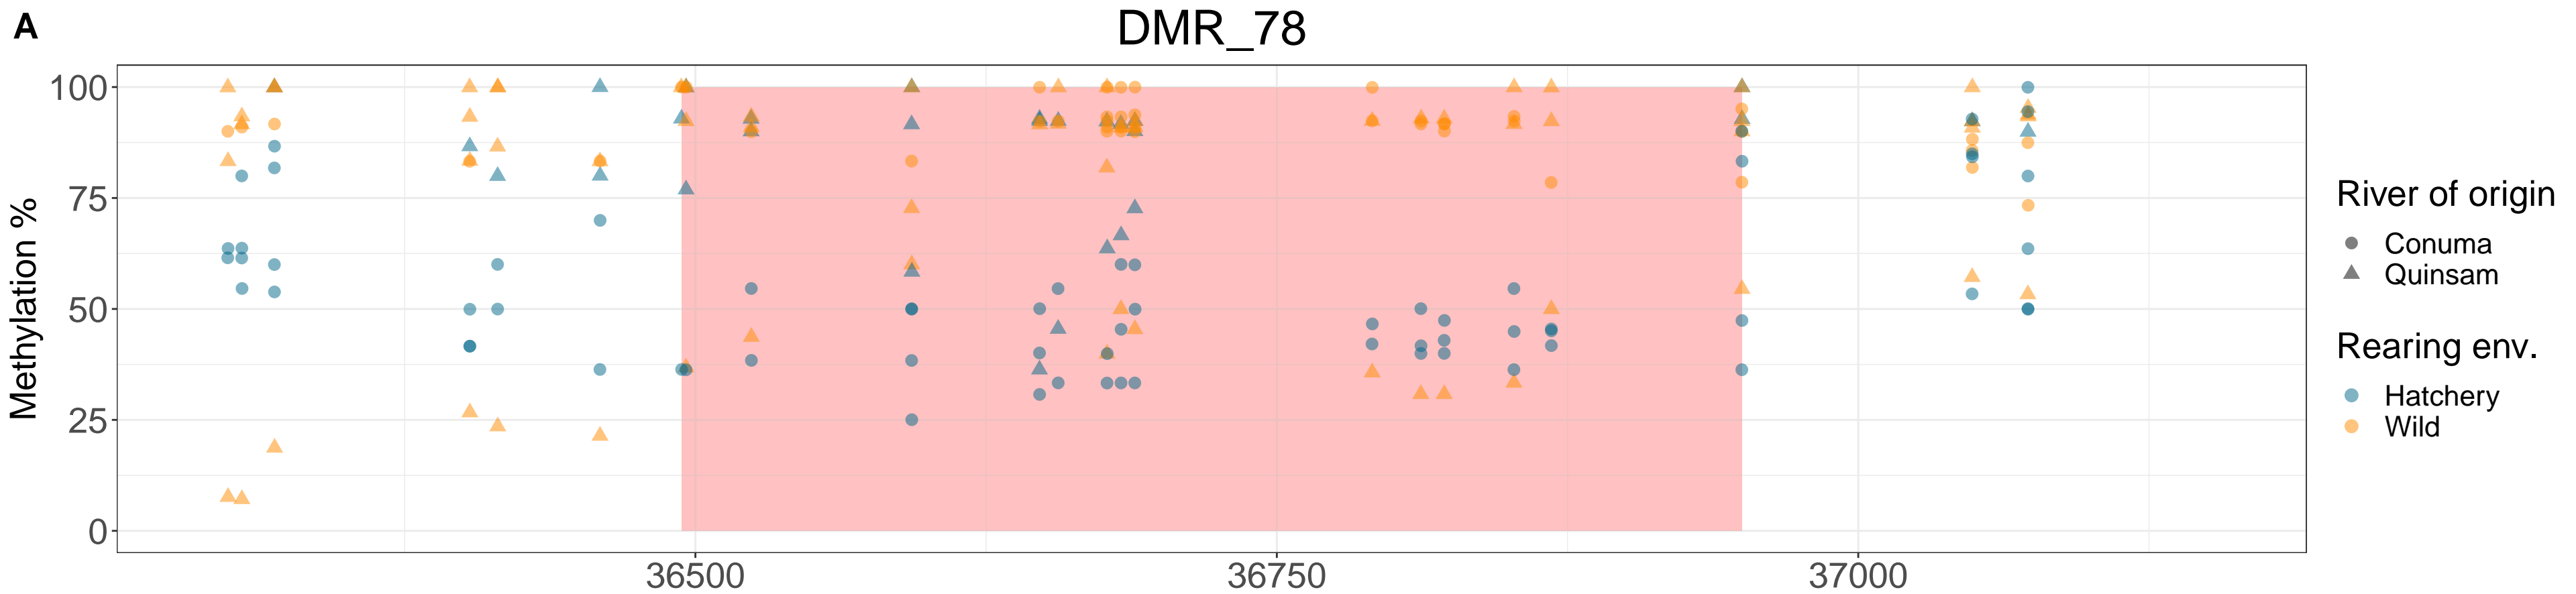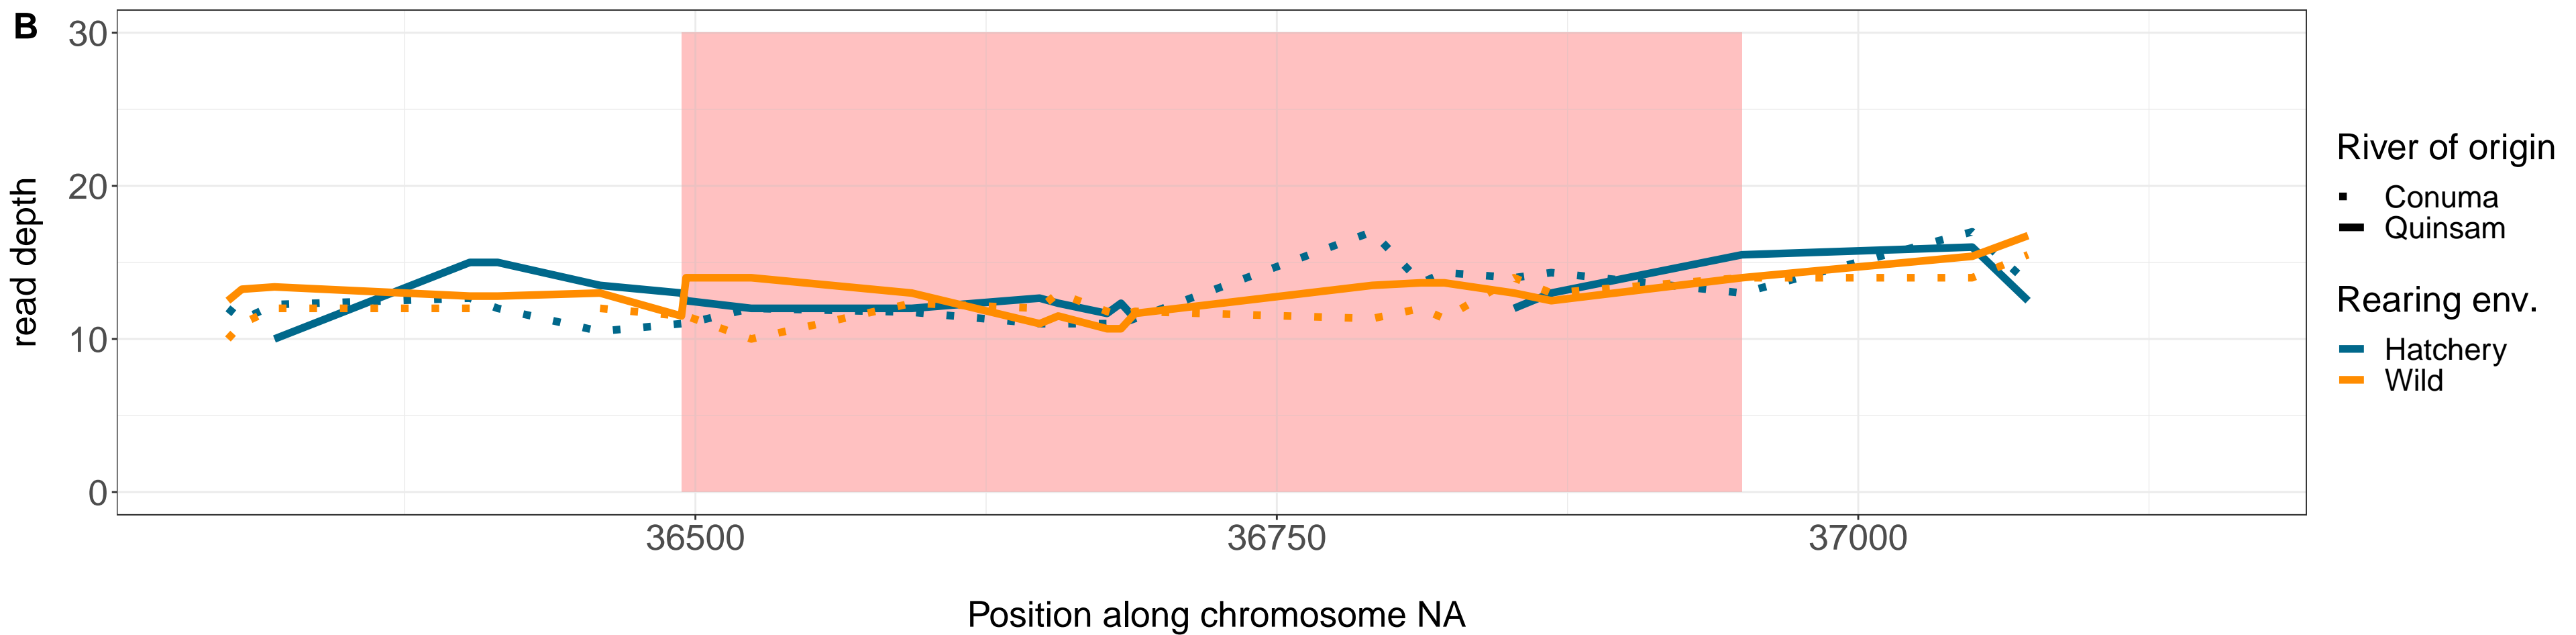

# DMR\_79

XM\_020457260.1

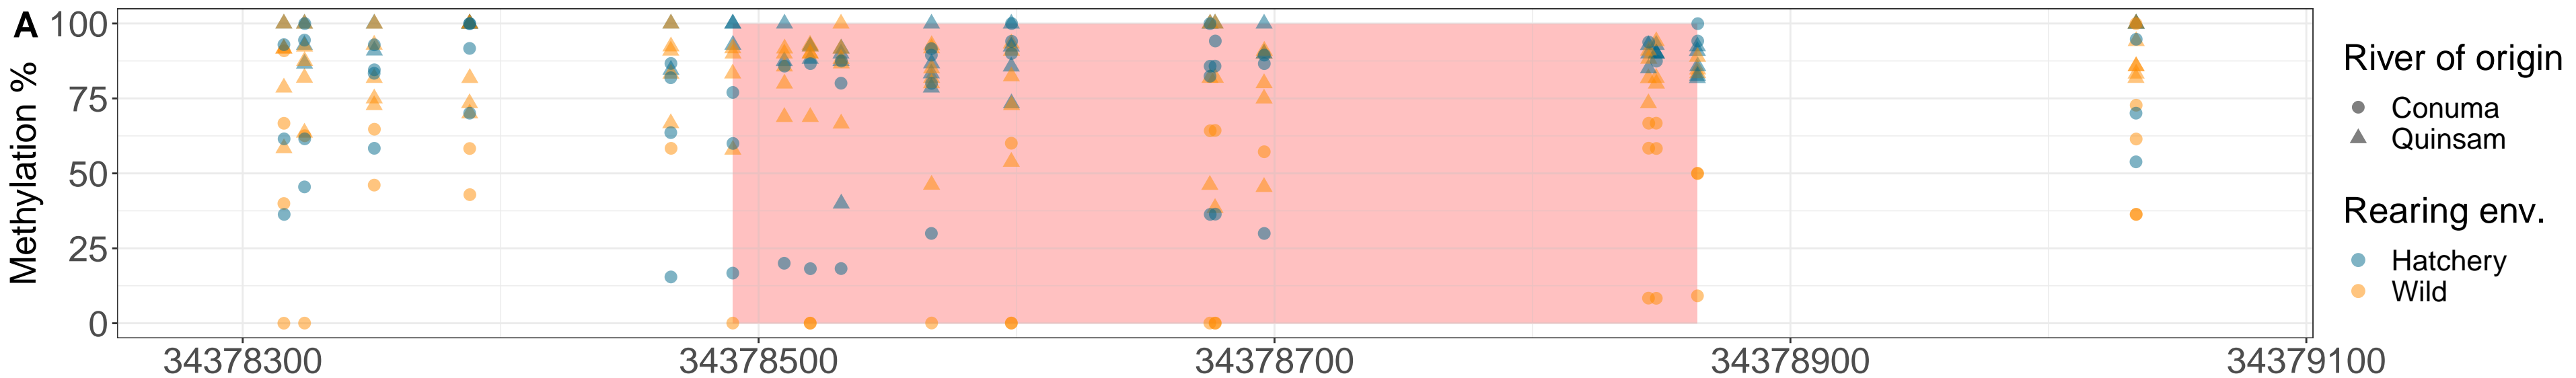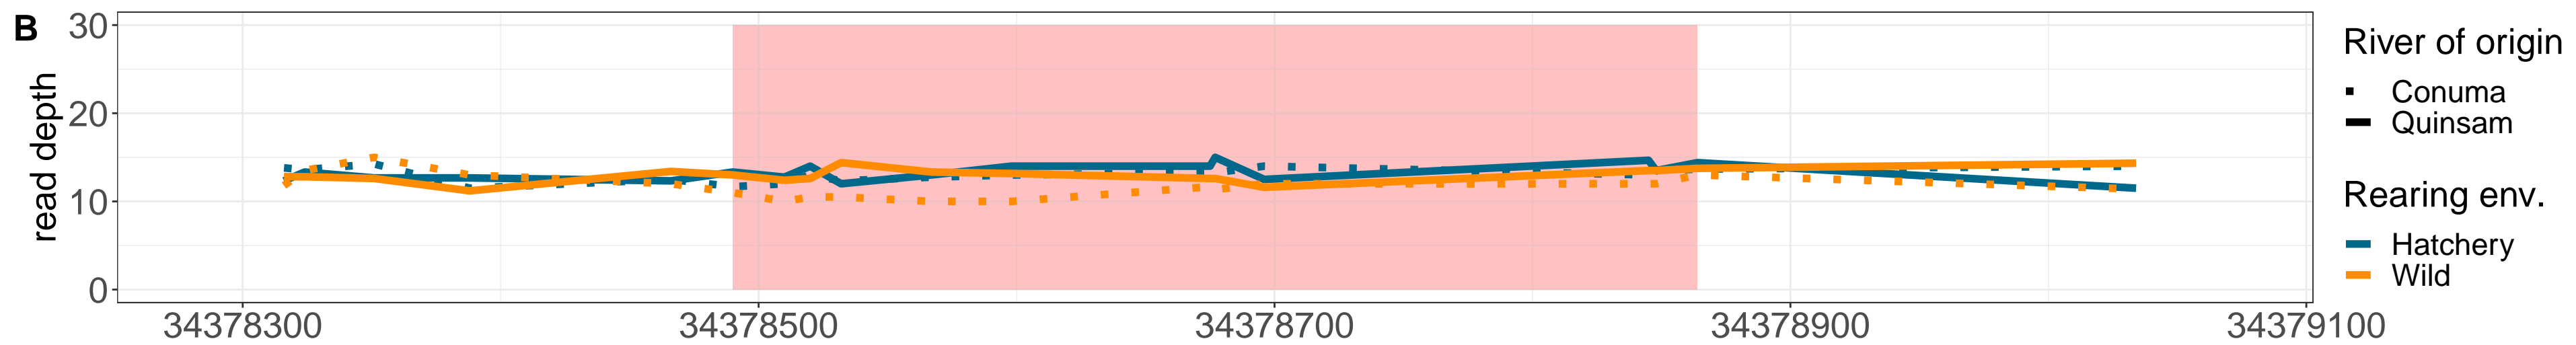

Position along chromosome 23

**A**

DMR\_80

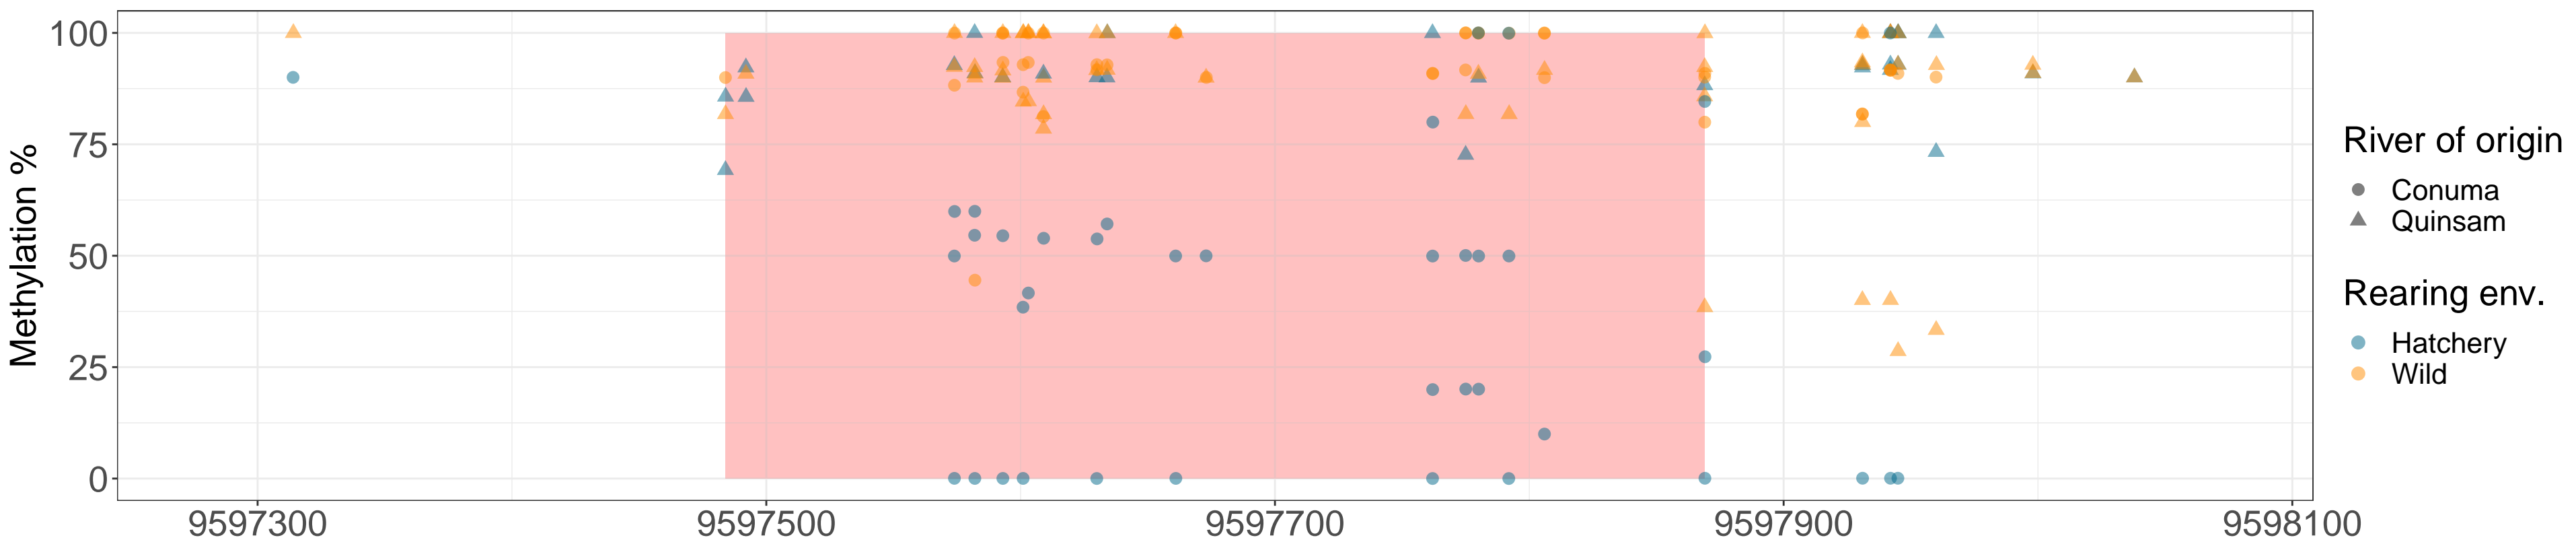**B**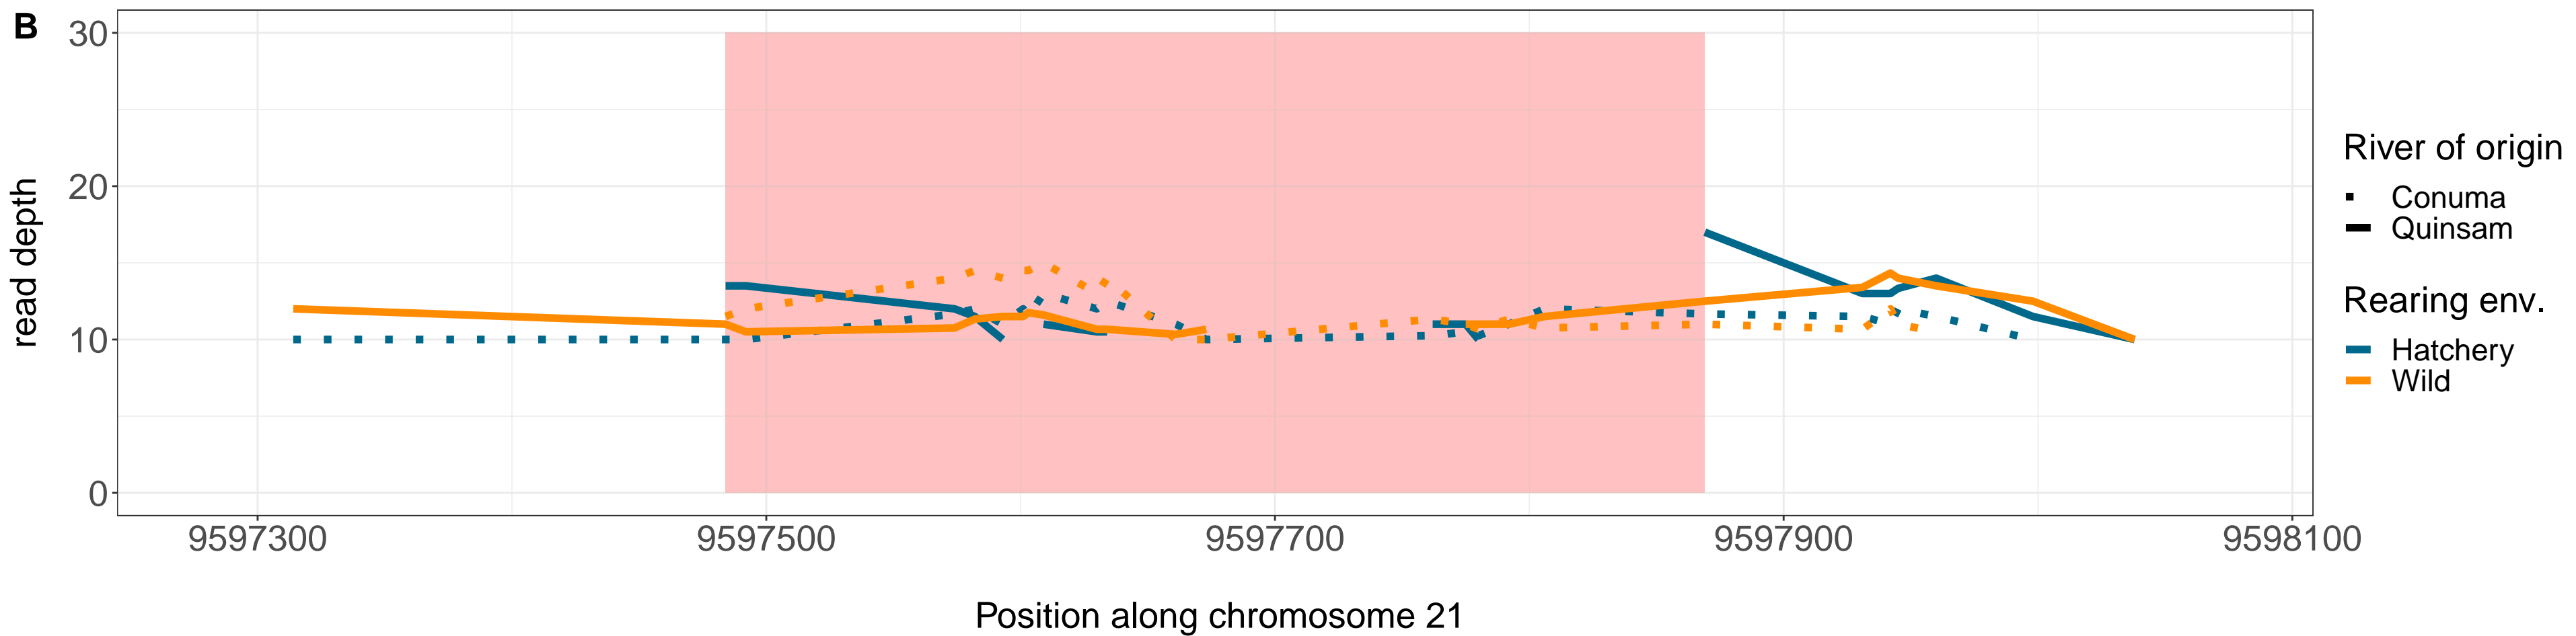

**A**

## DMR\_81

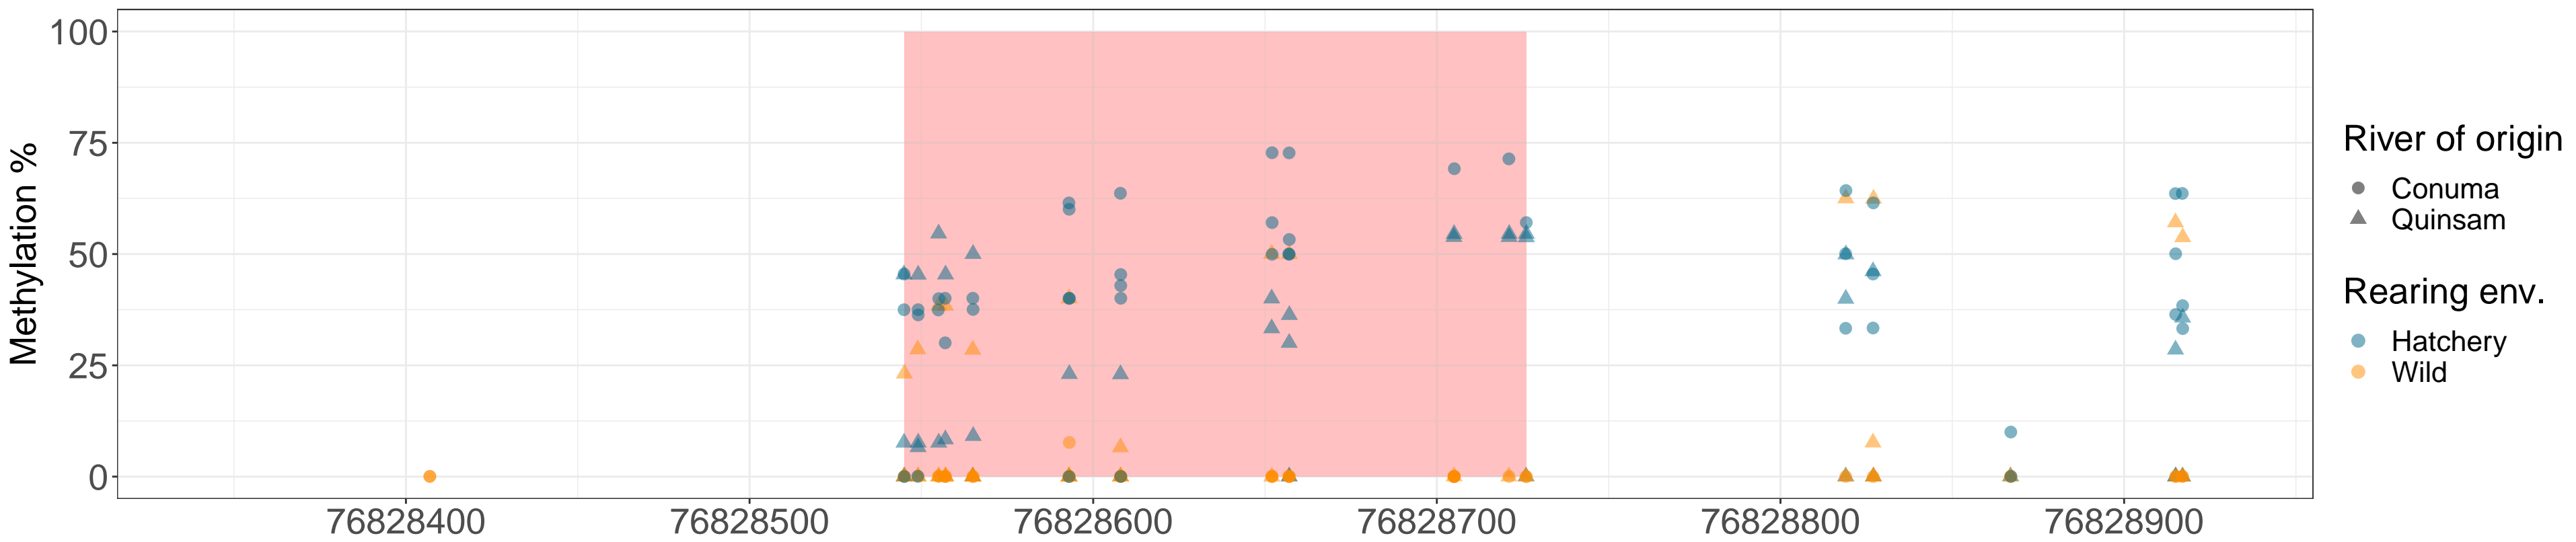**B**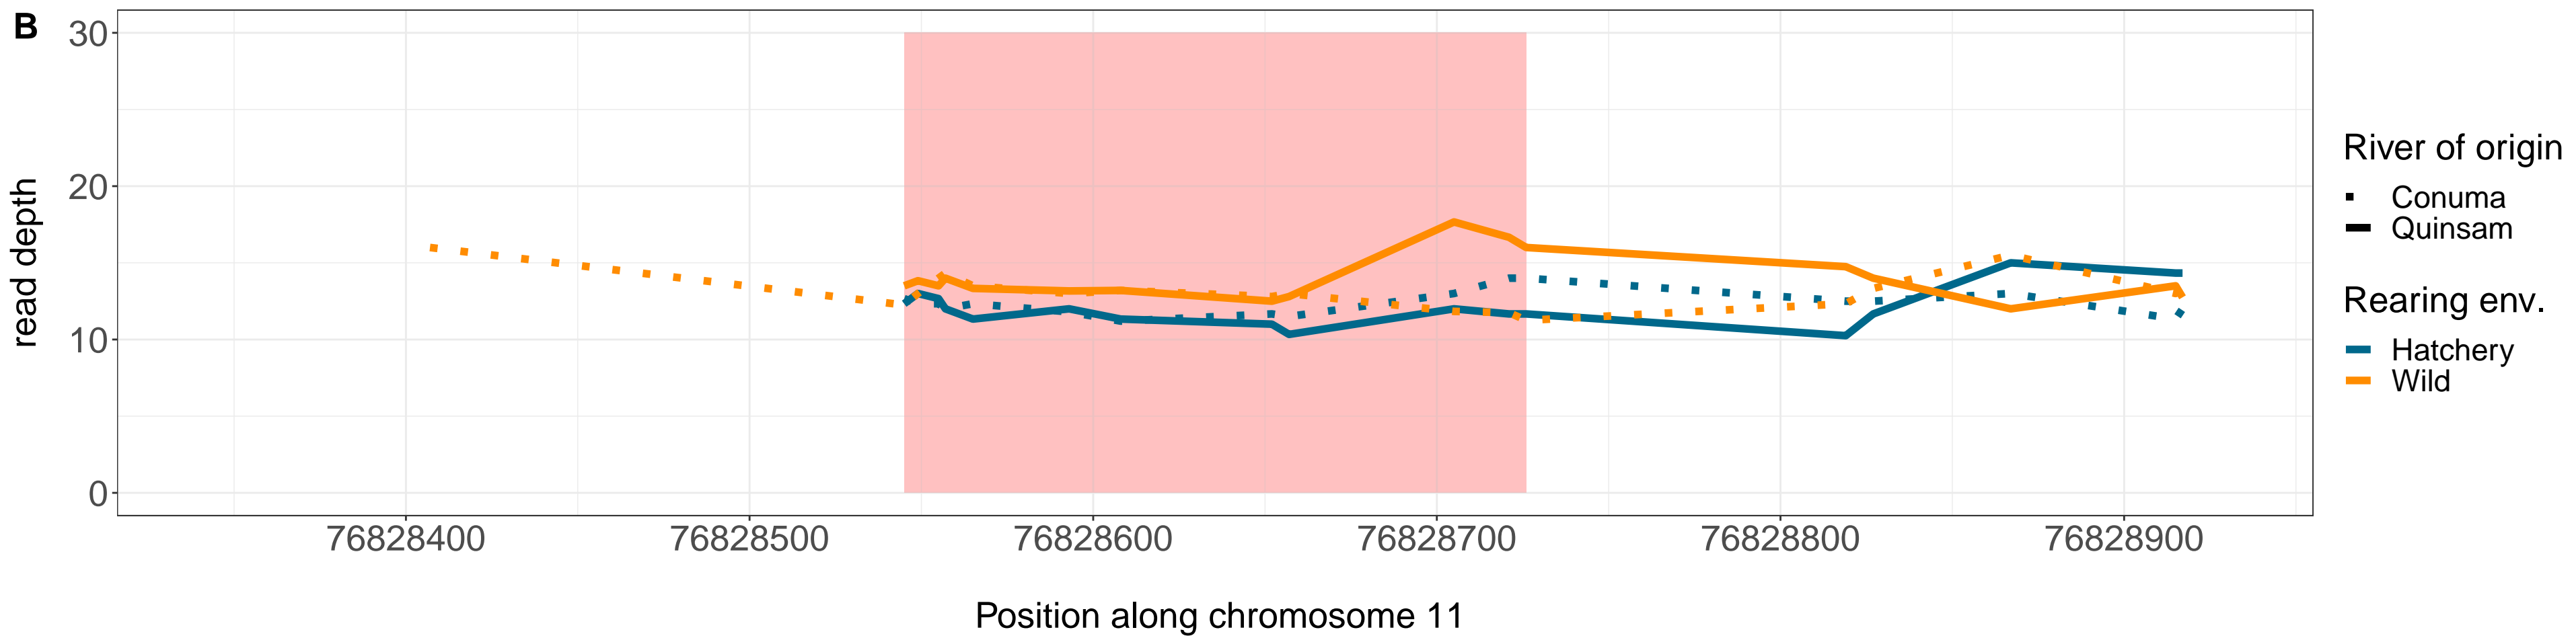

**A**

DMR\_82

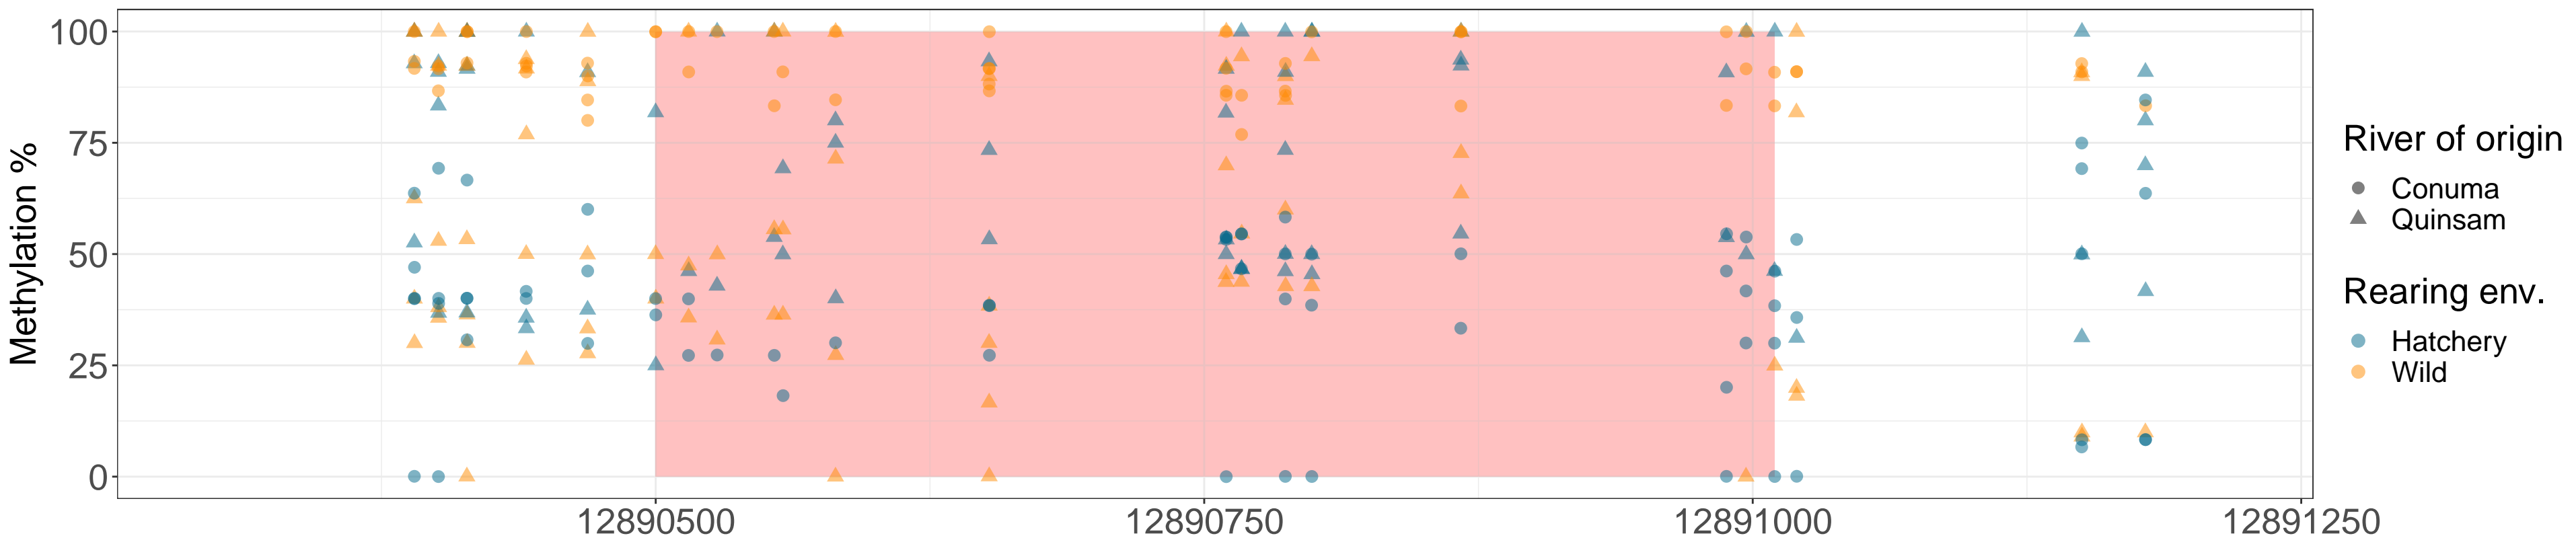**B**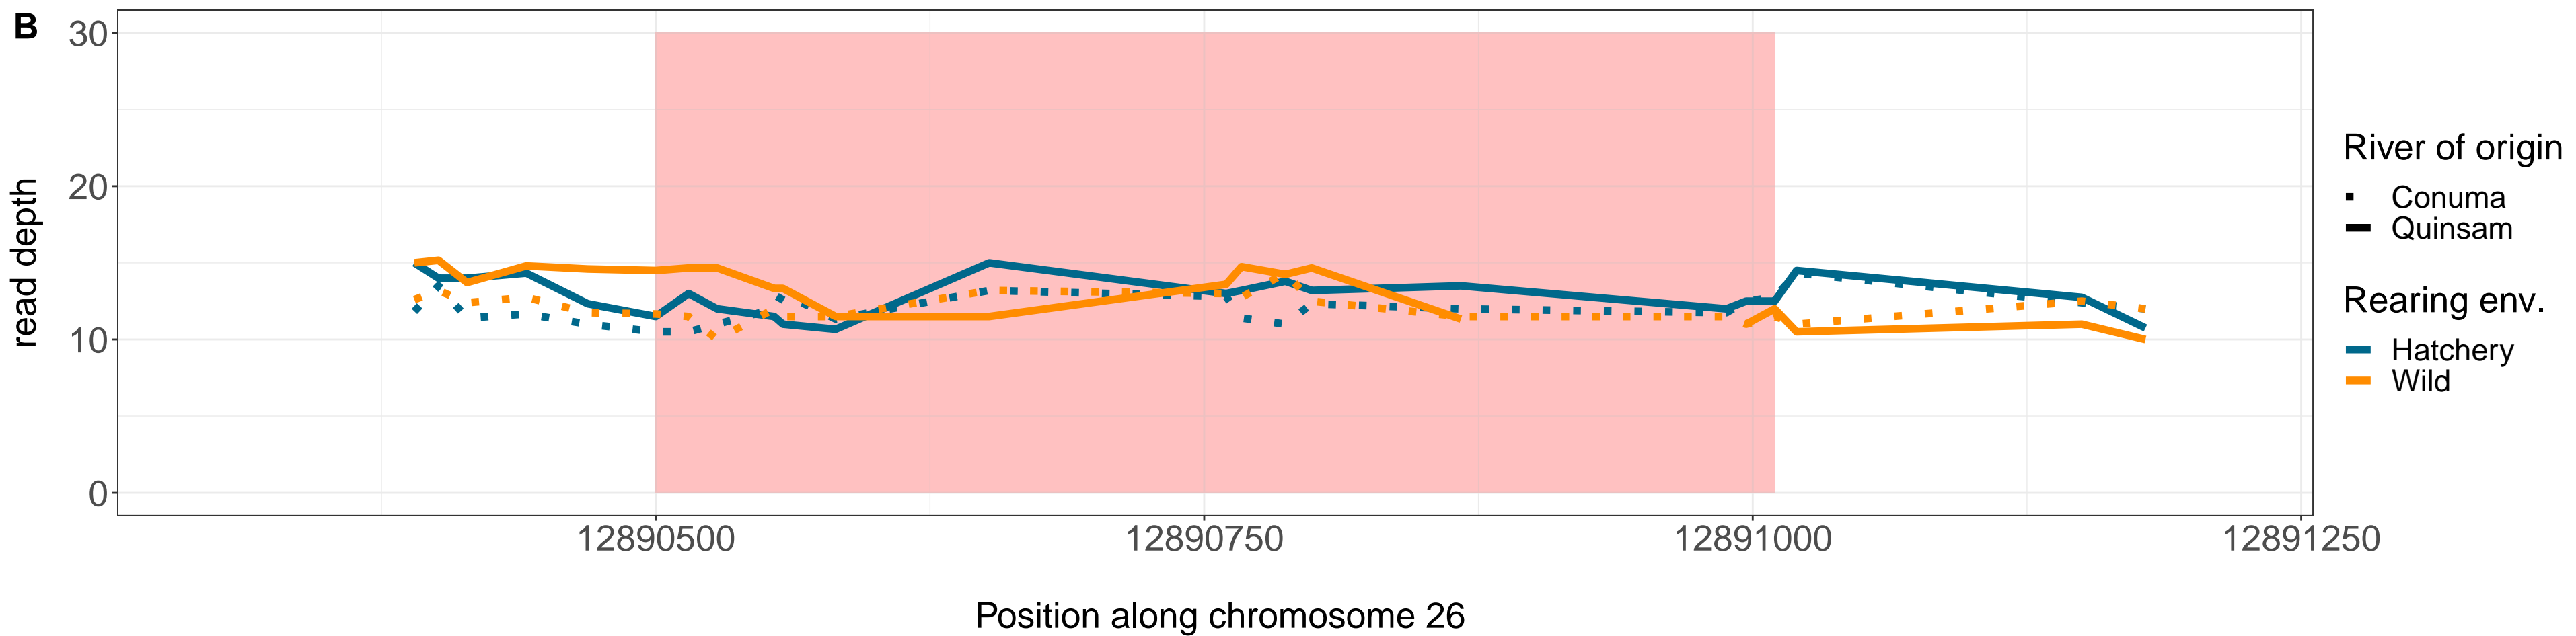

# DMR\_84

XM\_020468751.1

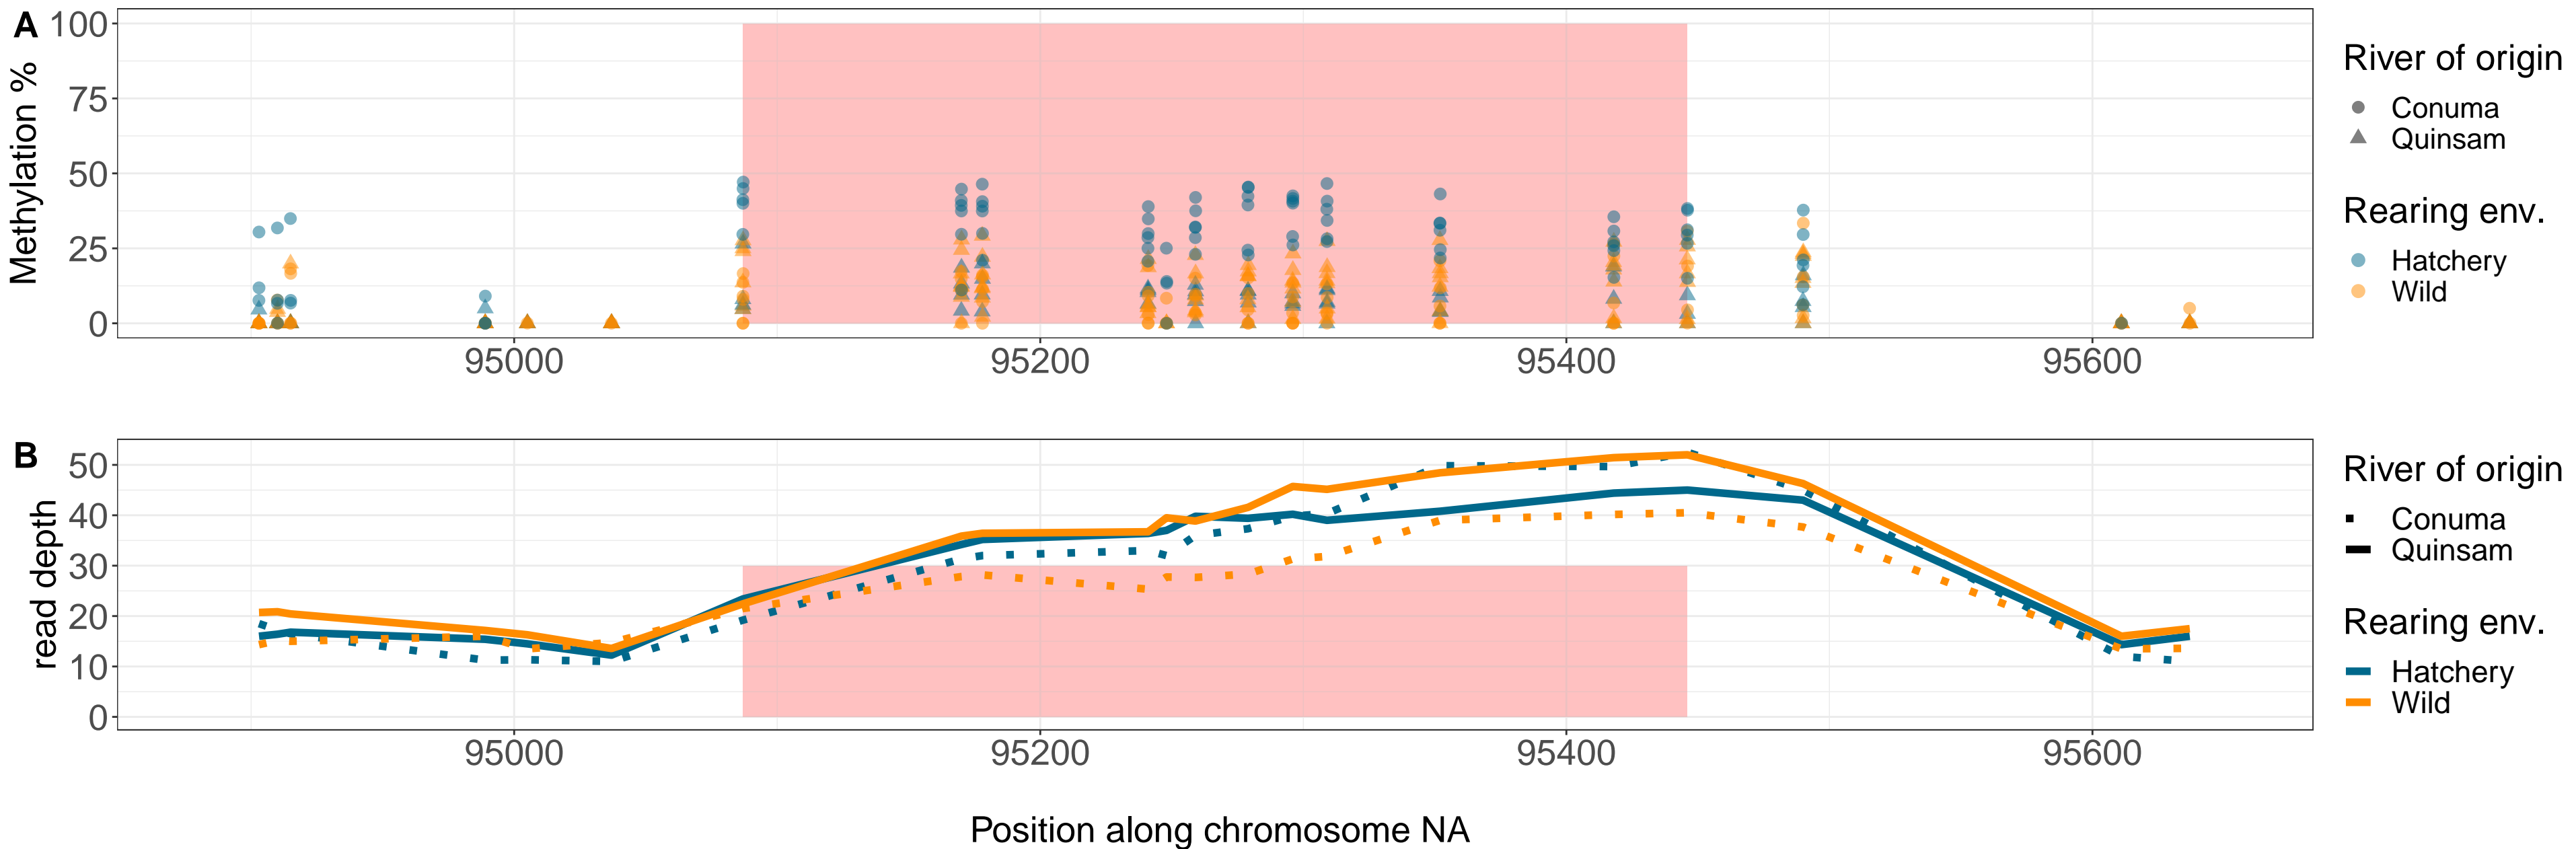



# DMR\_85

XM\_020454573.1

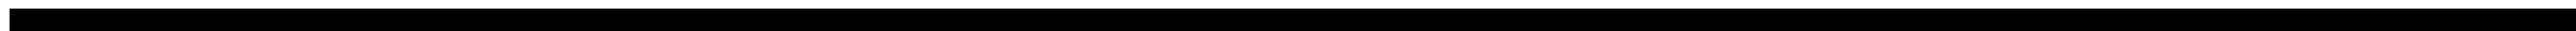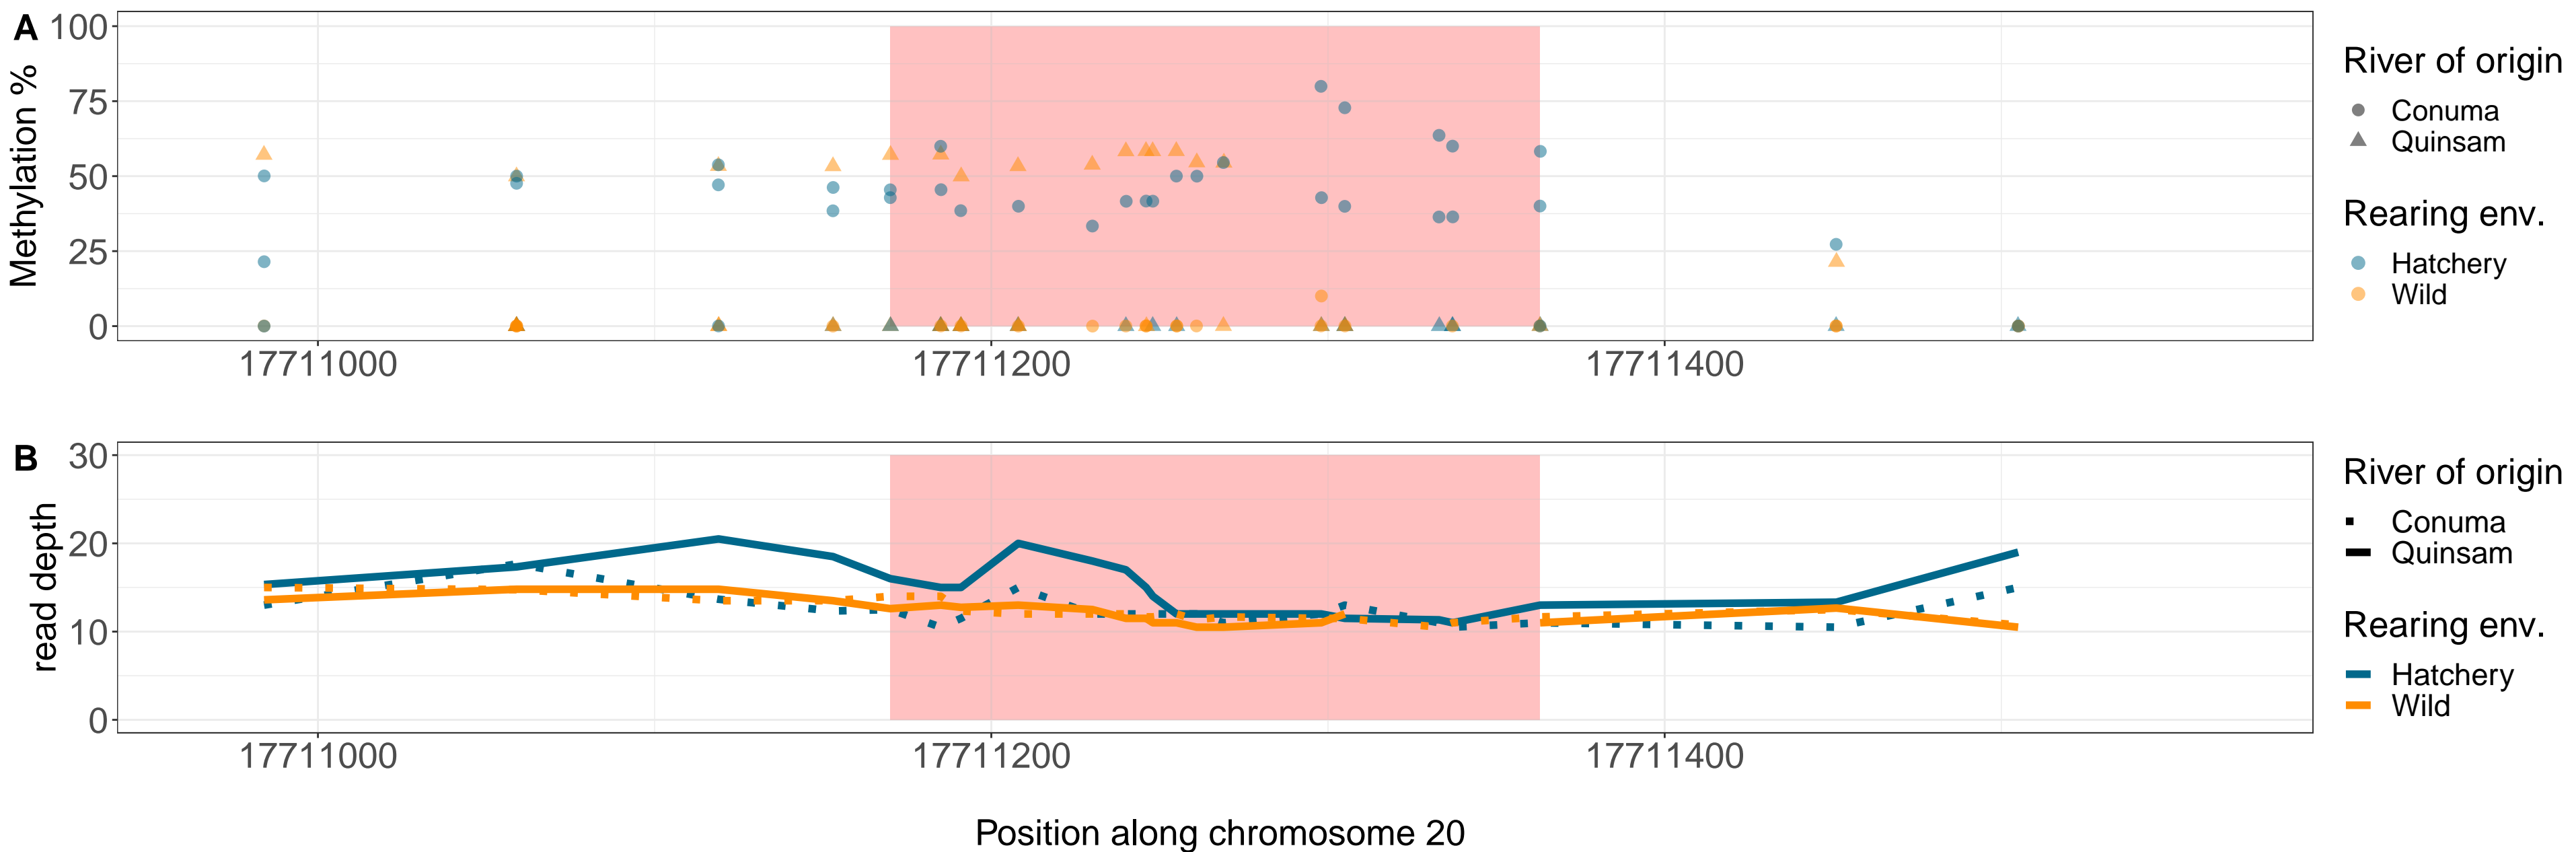

**A**

DMR\_86

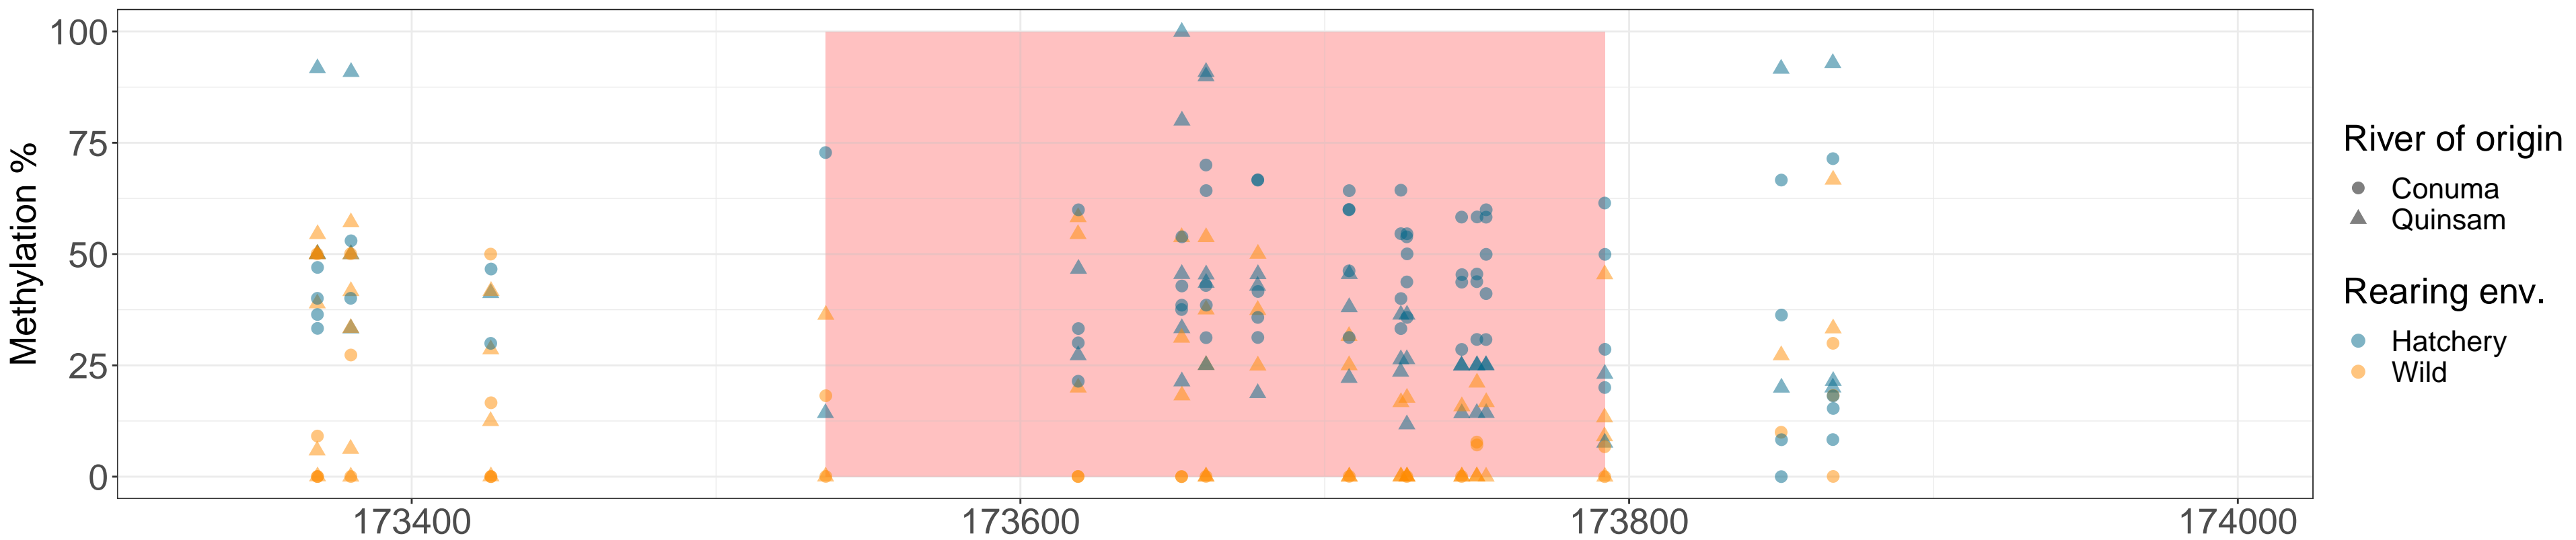**B**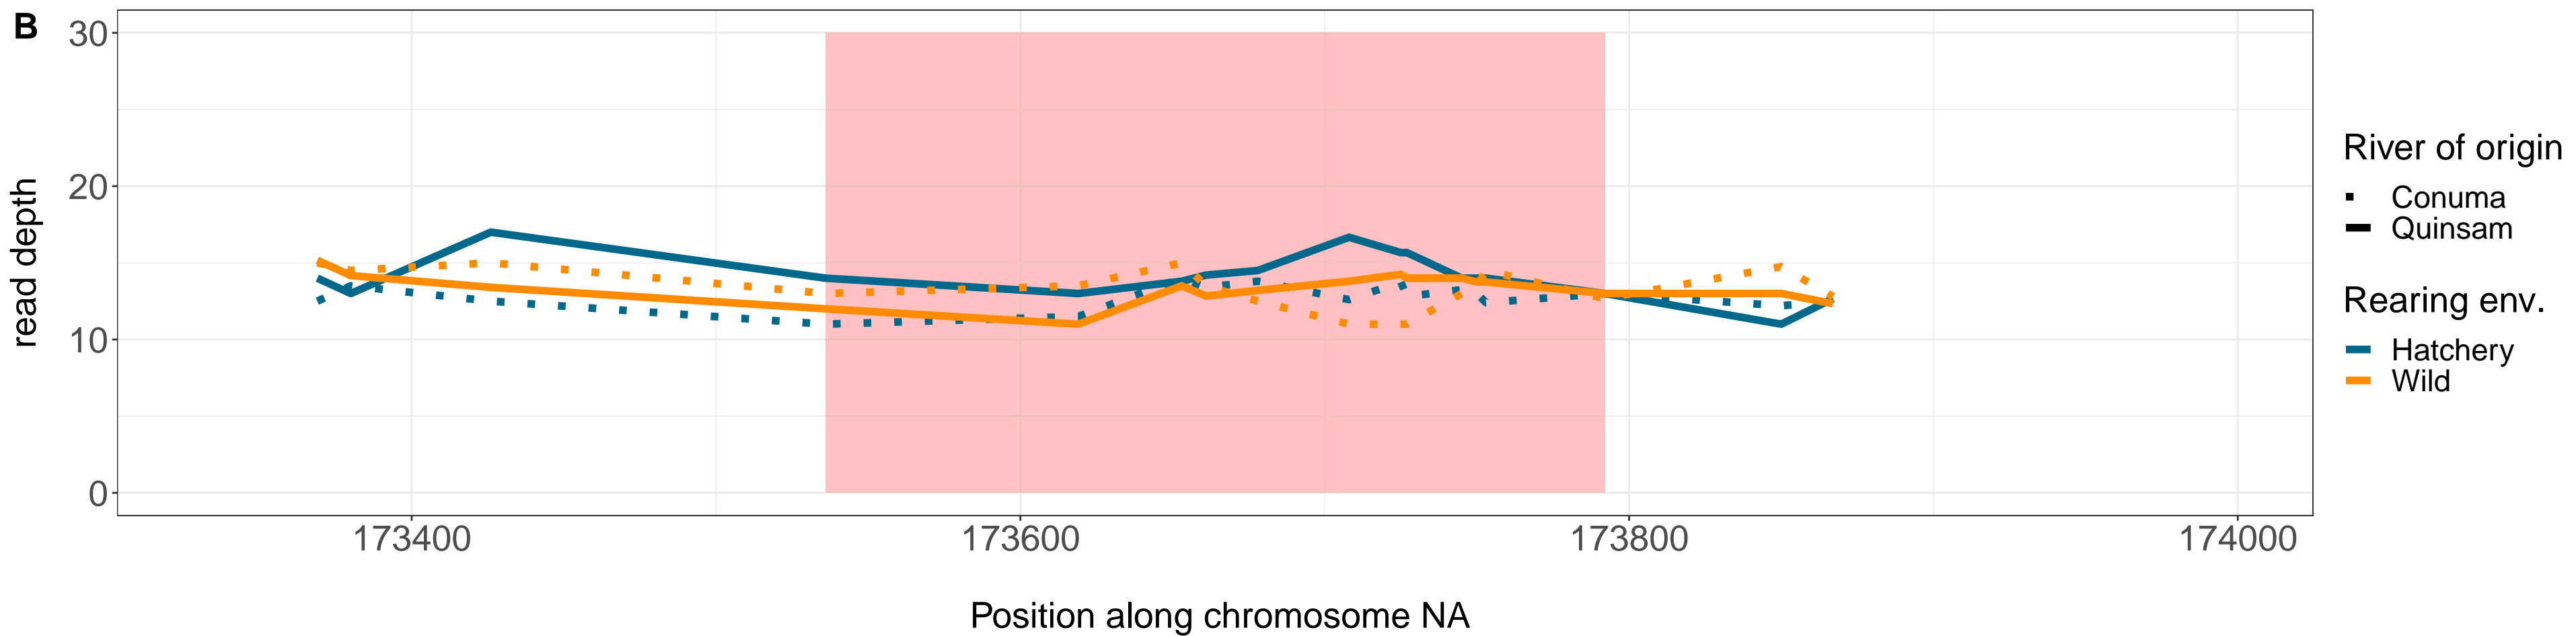

**A**

DMR\_87

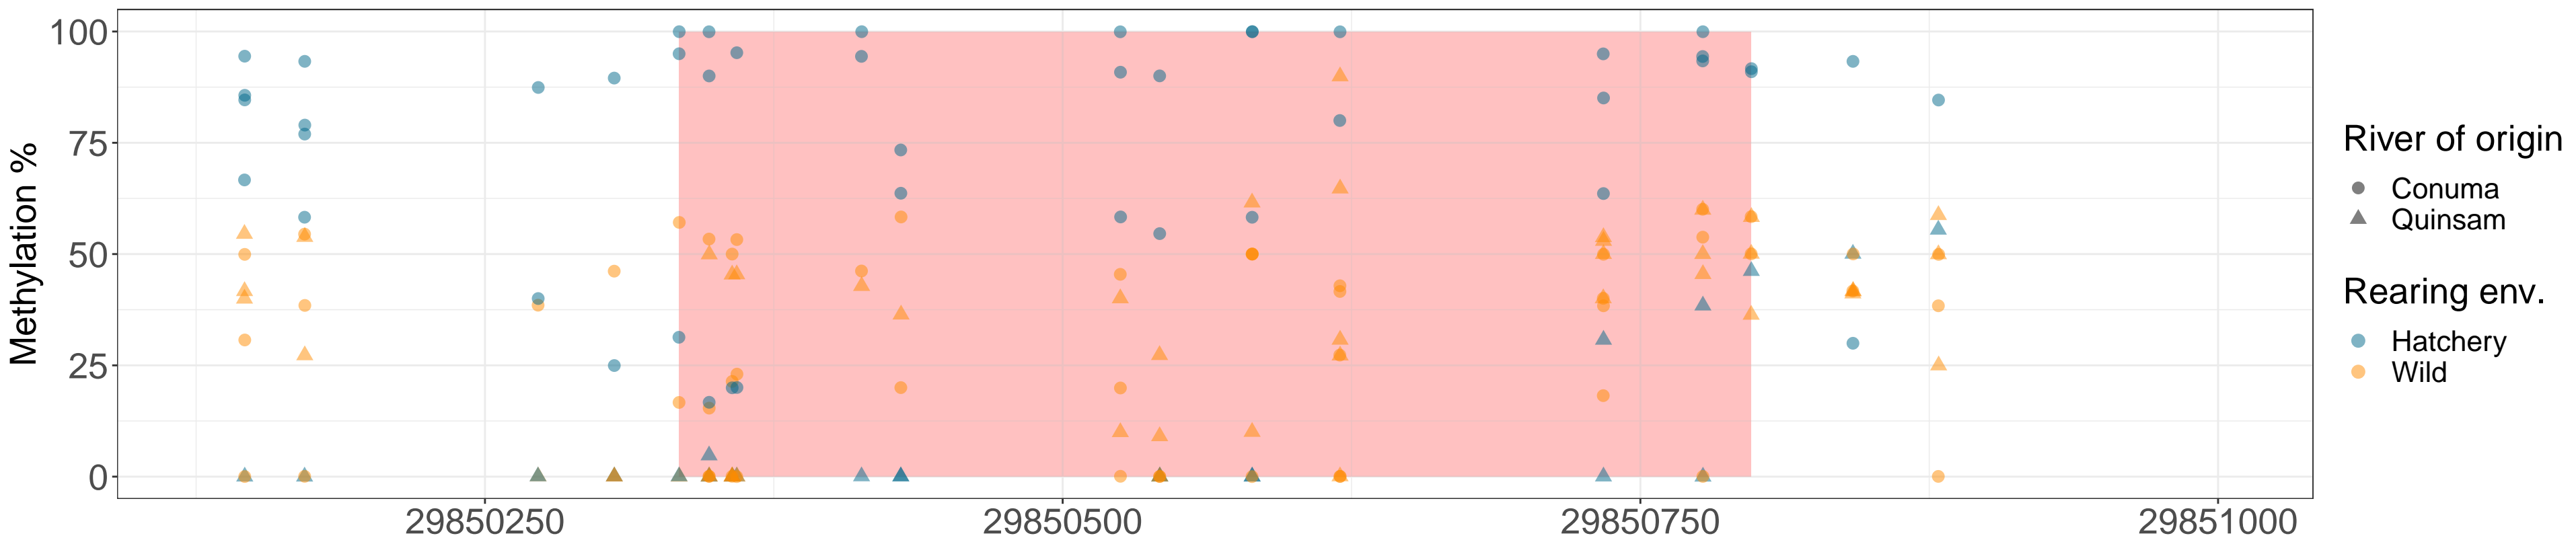**B**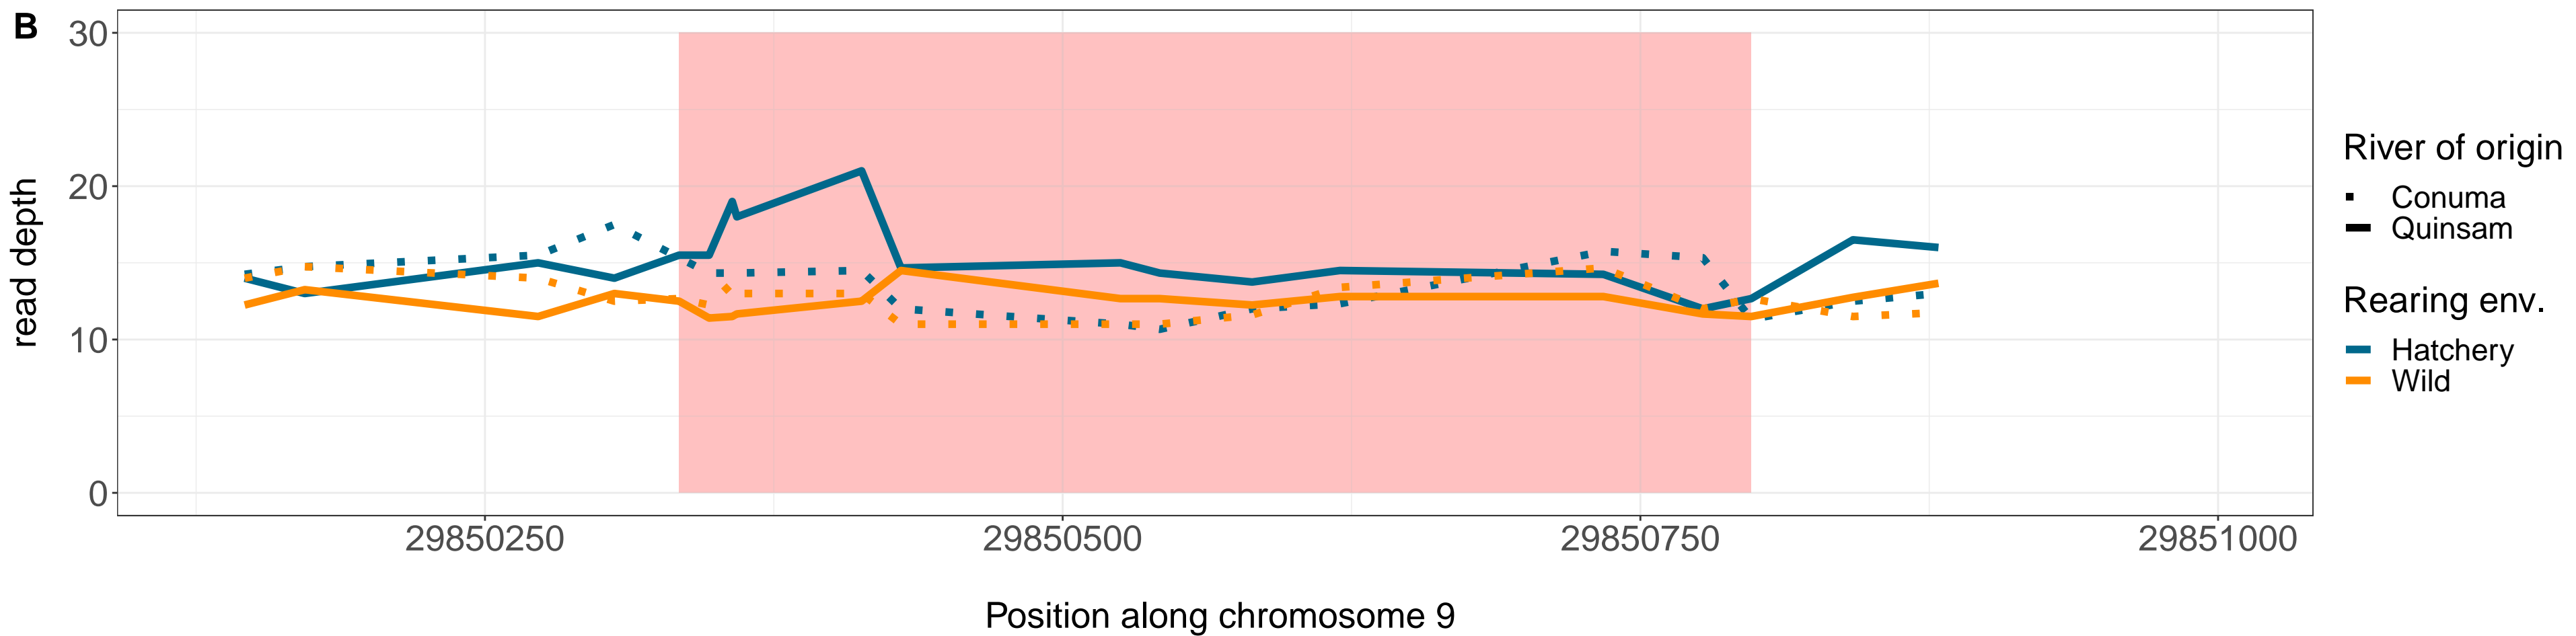

**A**

DMR\_88

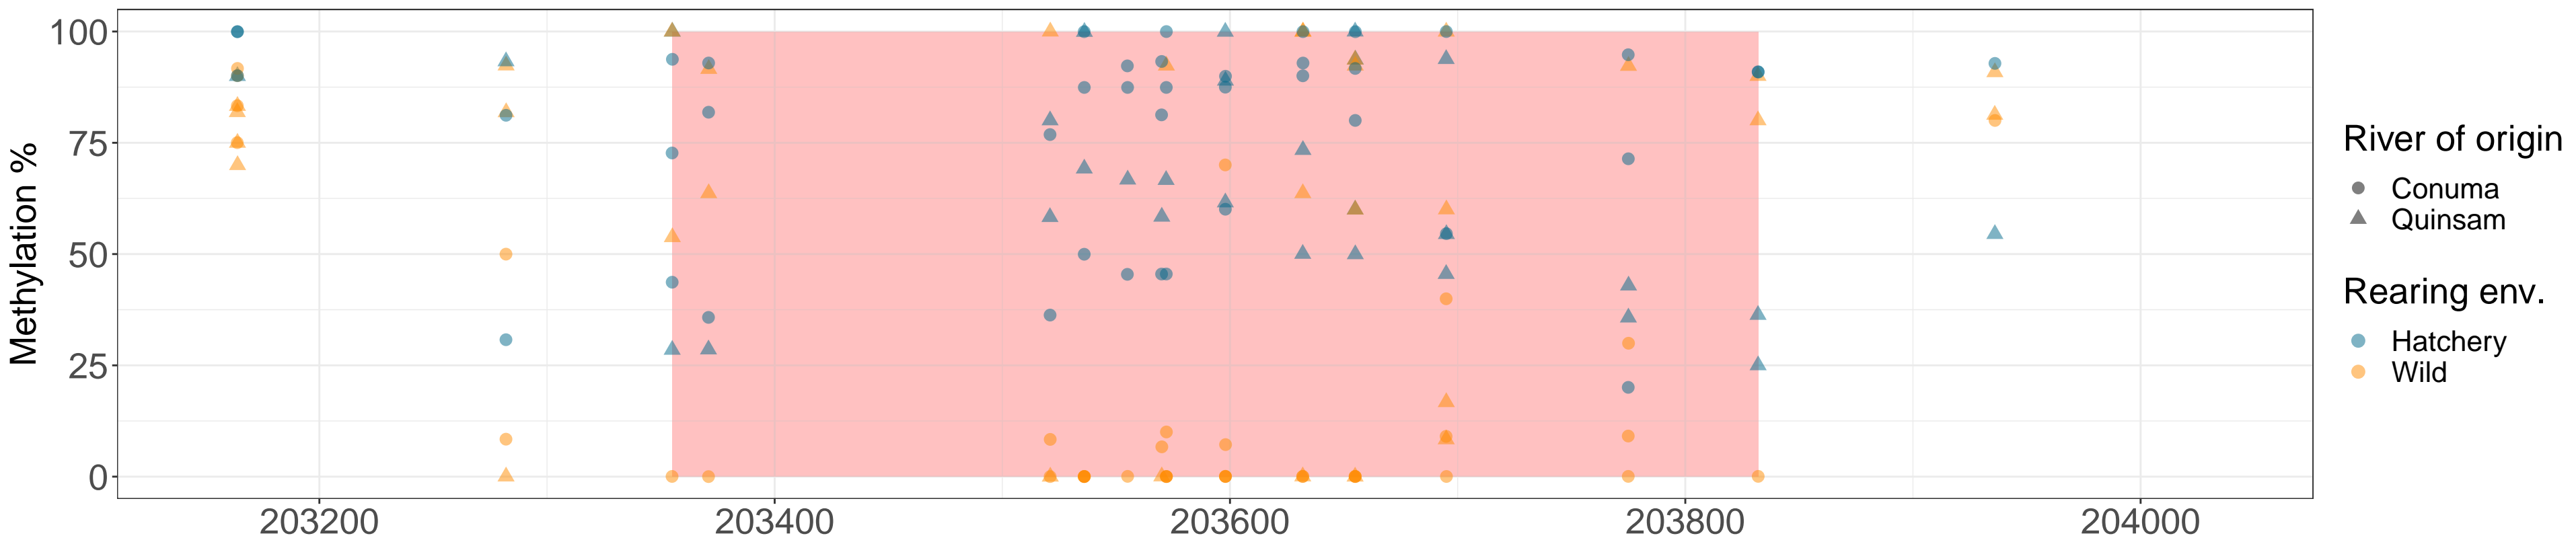**B**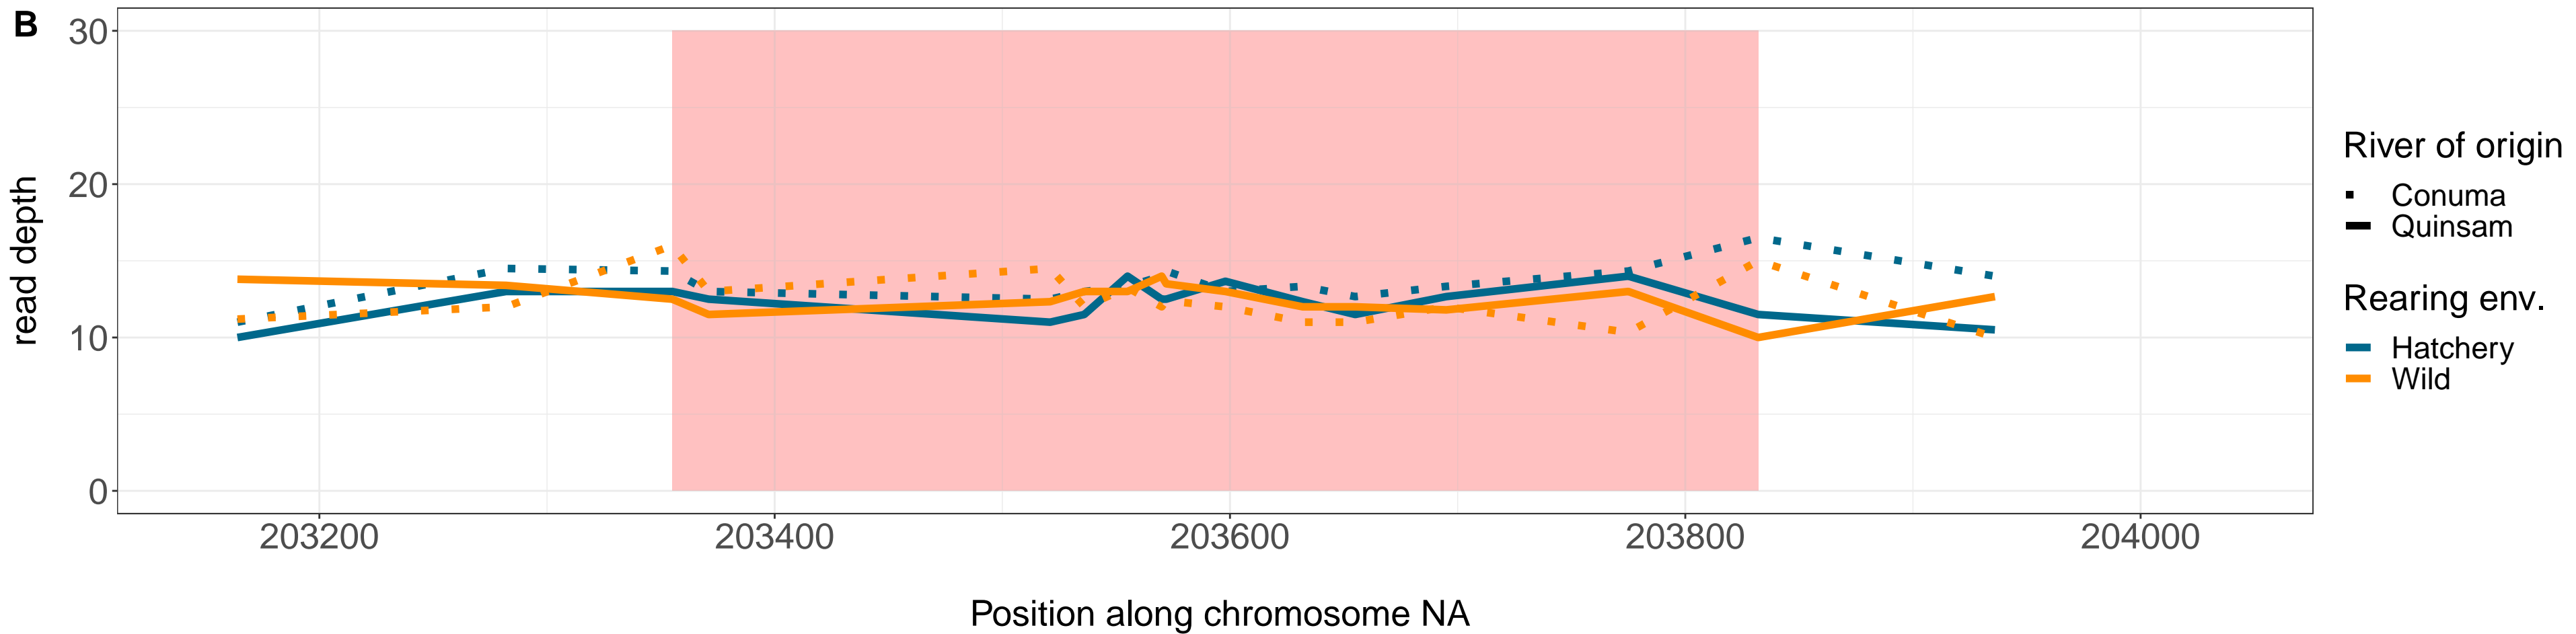

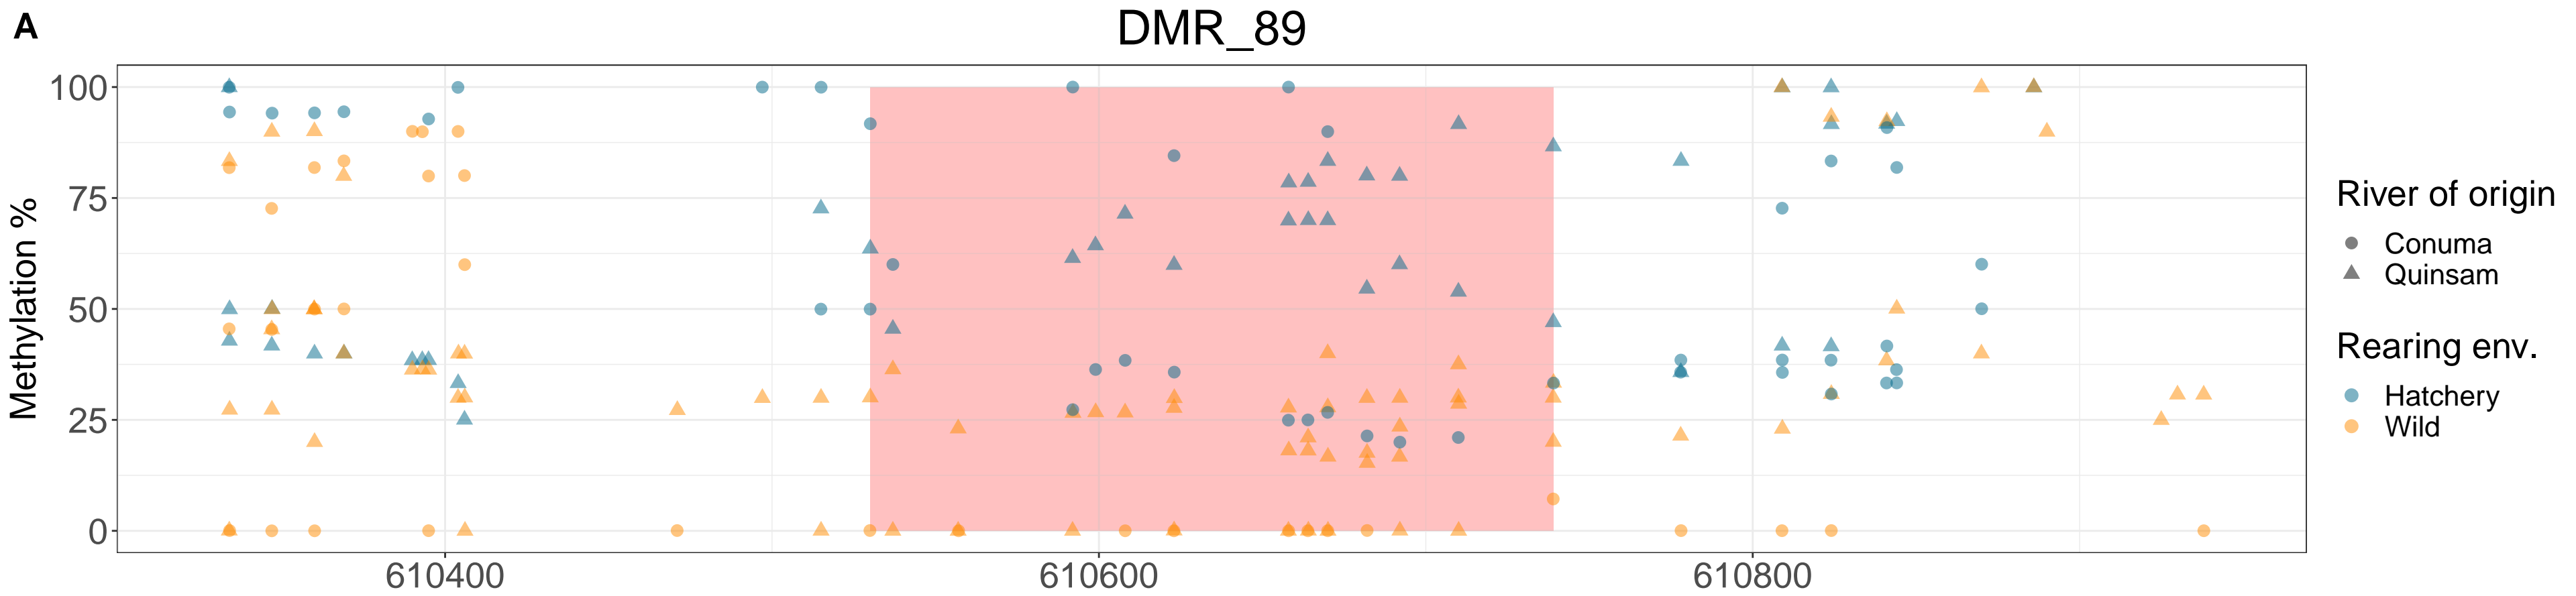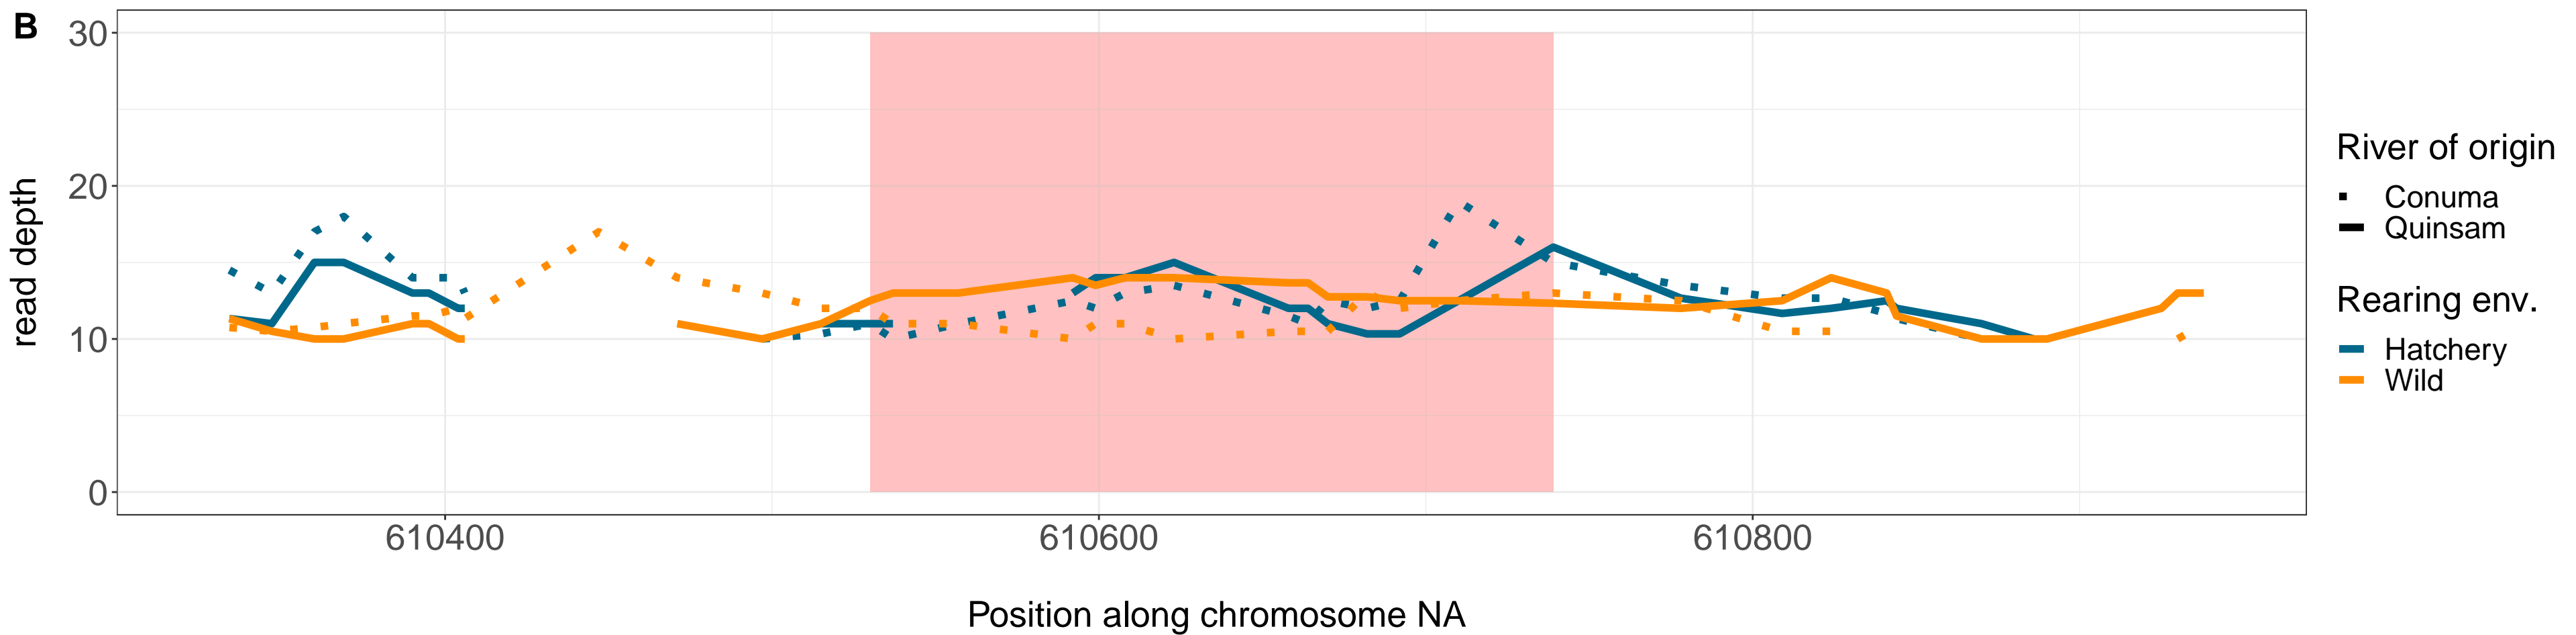

**A**

## DMR\_90

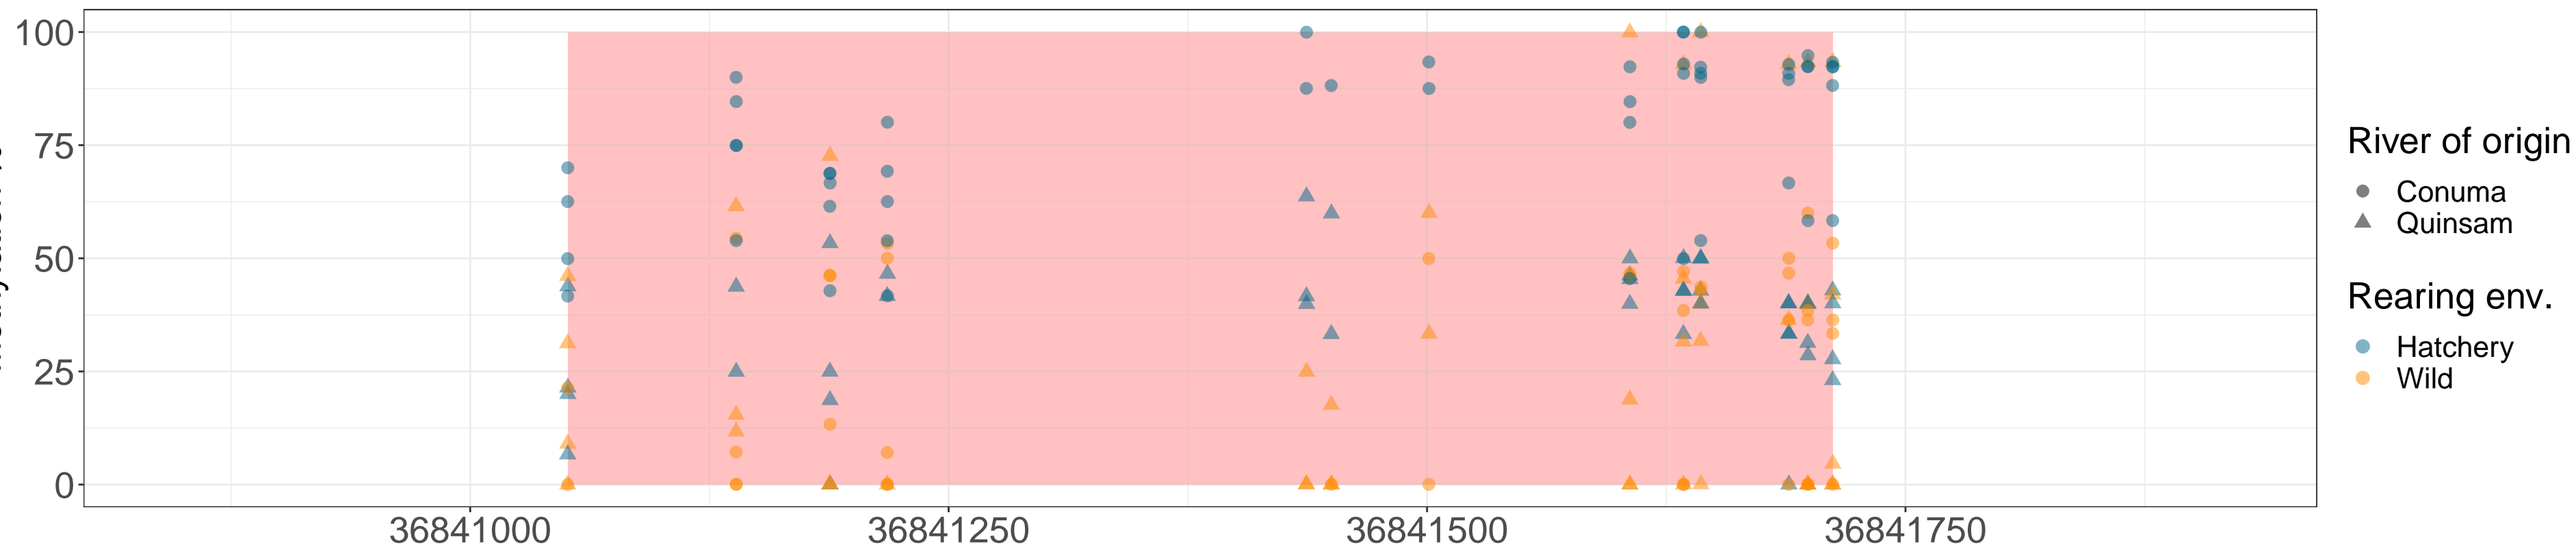**B**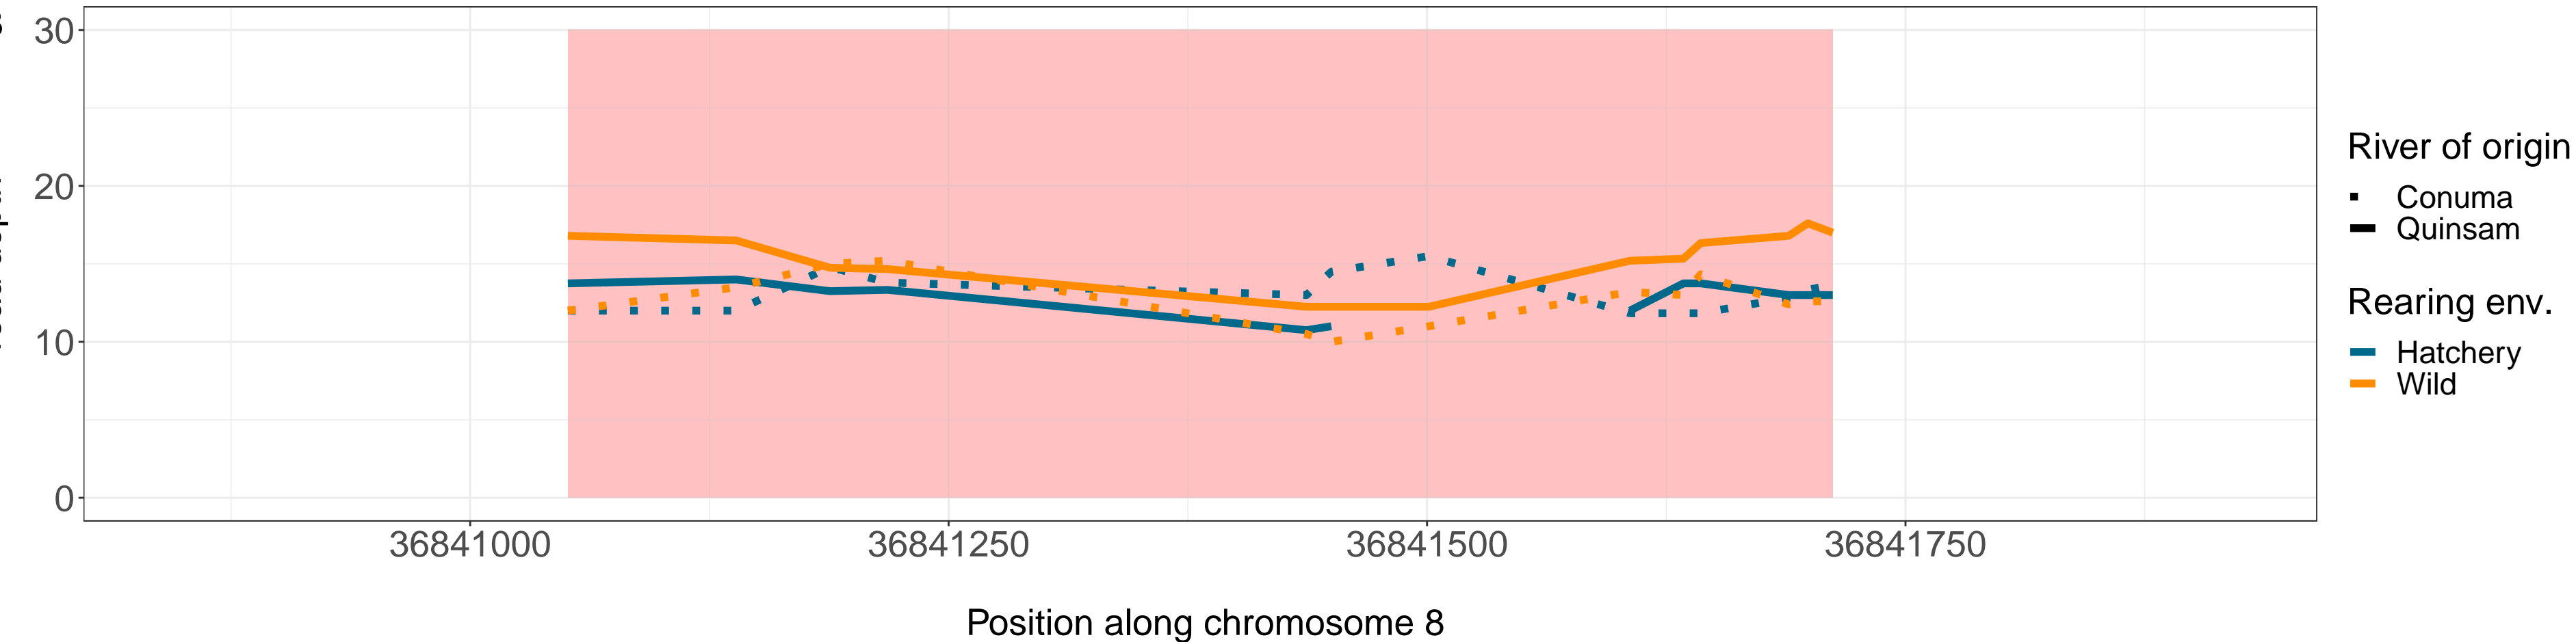

# DMR\_91

XM\_020464575.1

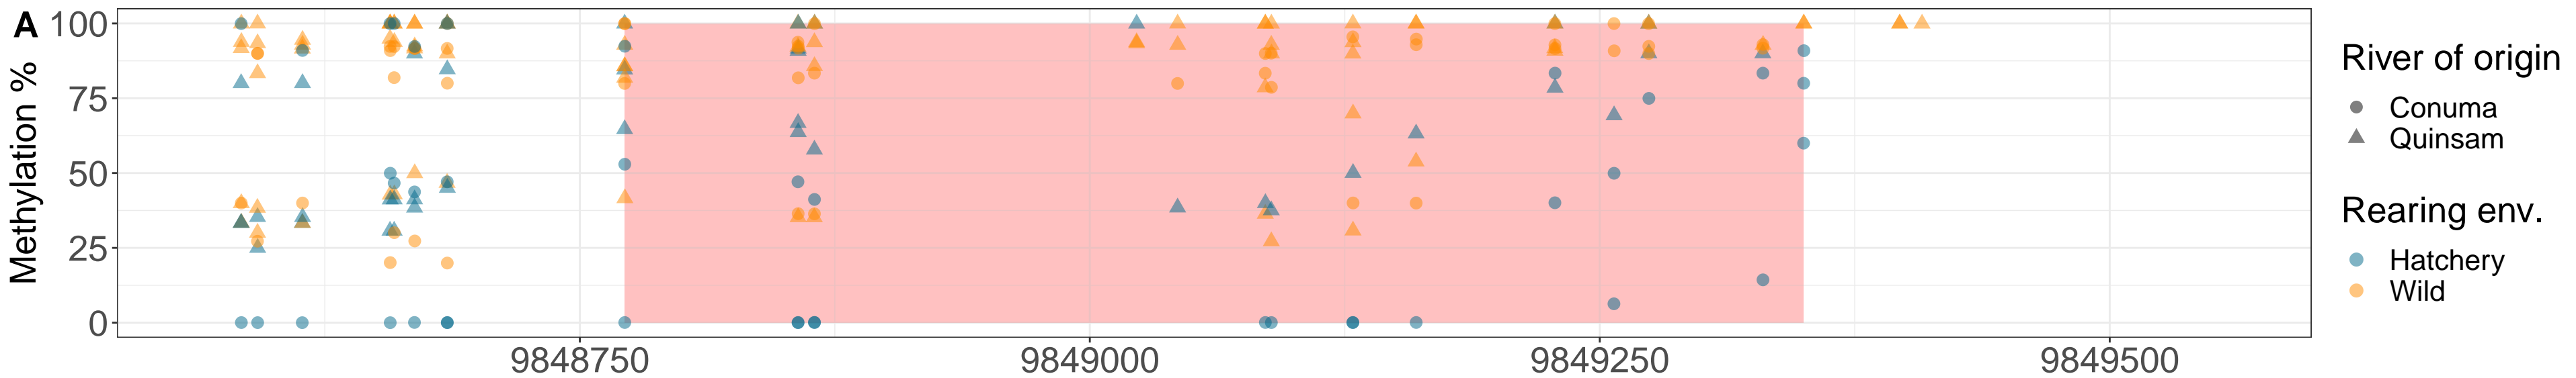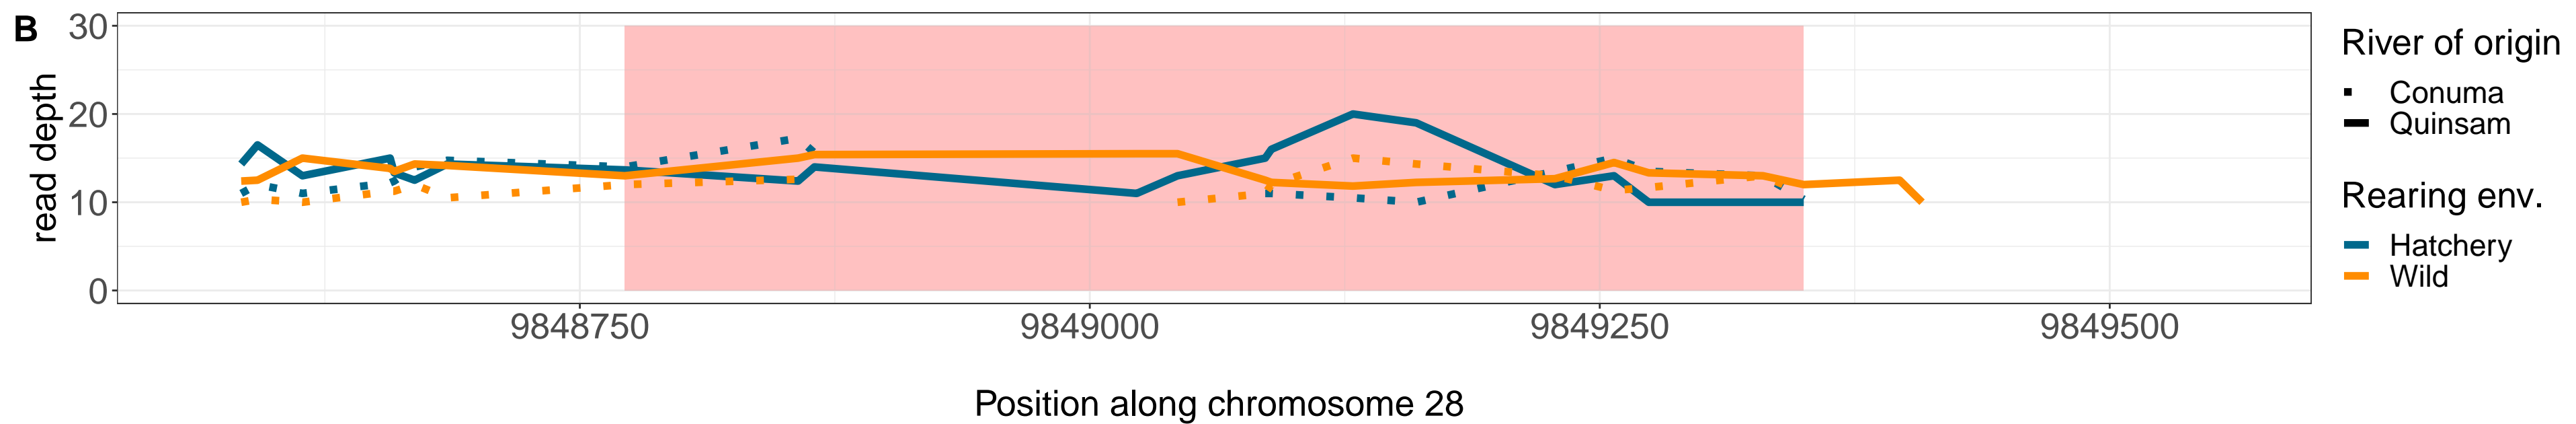

**A**

DMR\_92

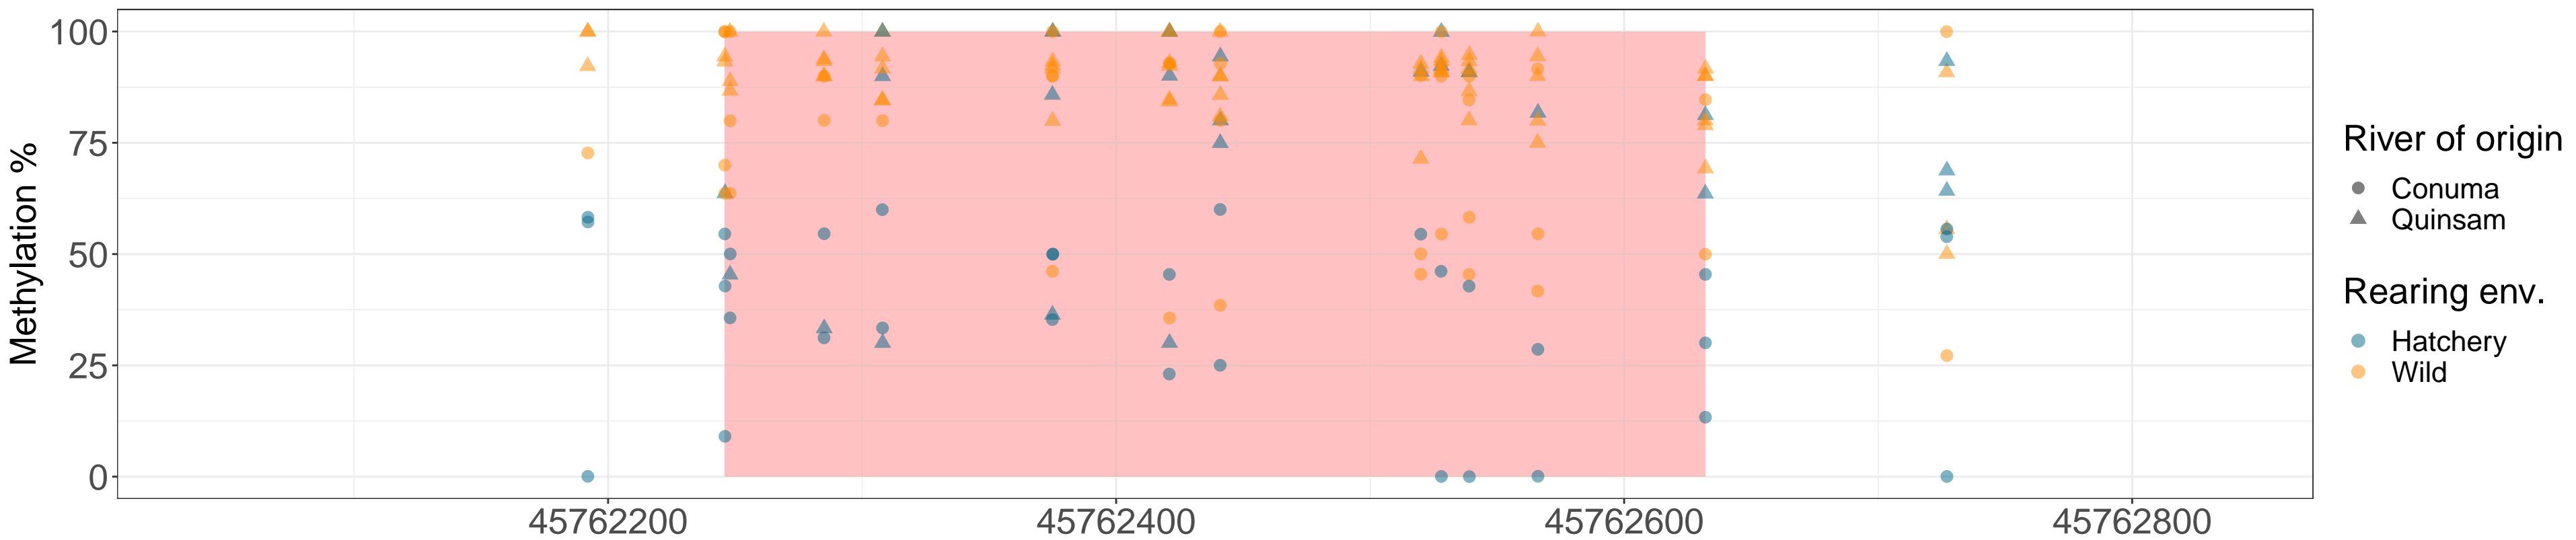**B**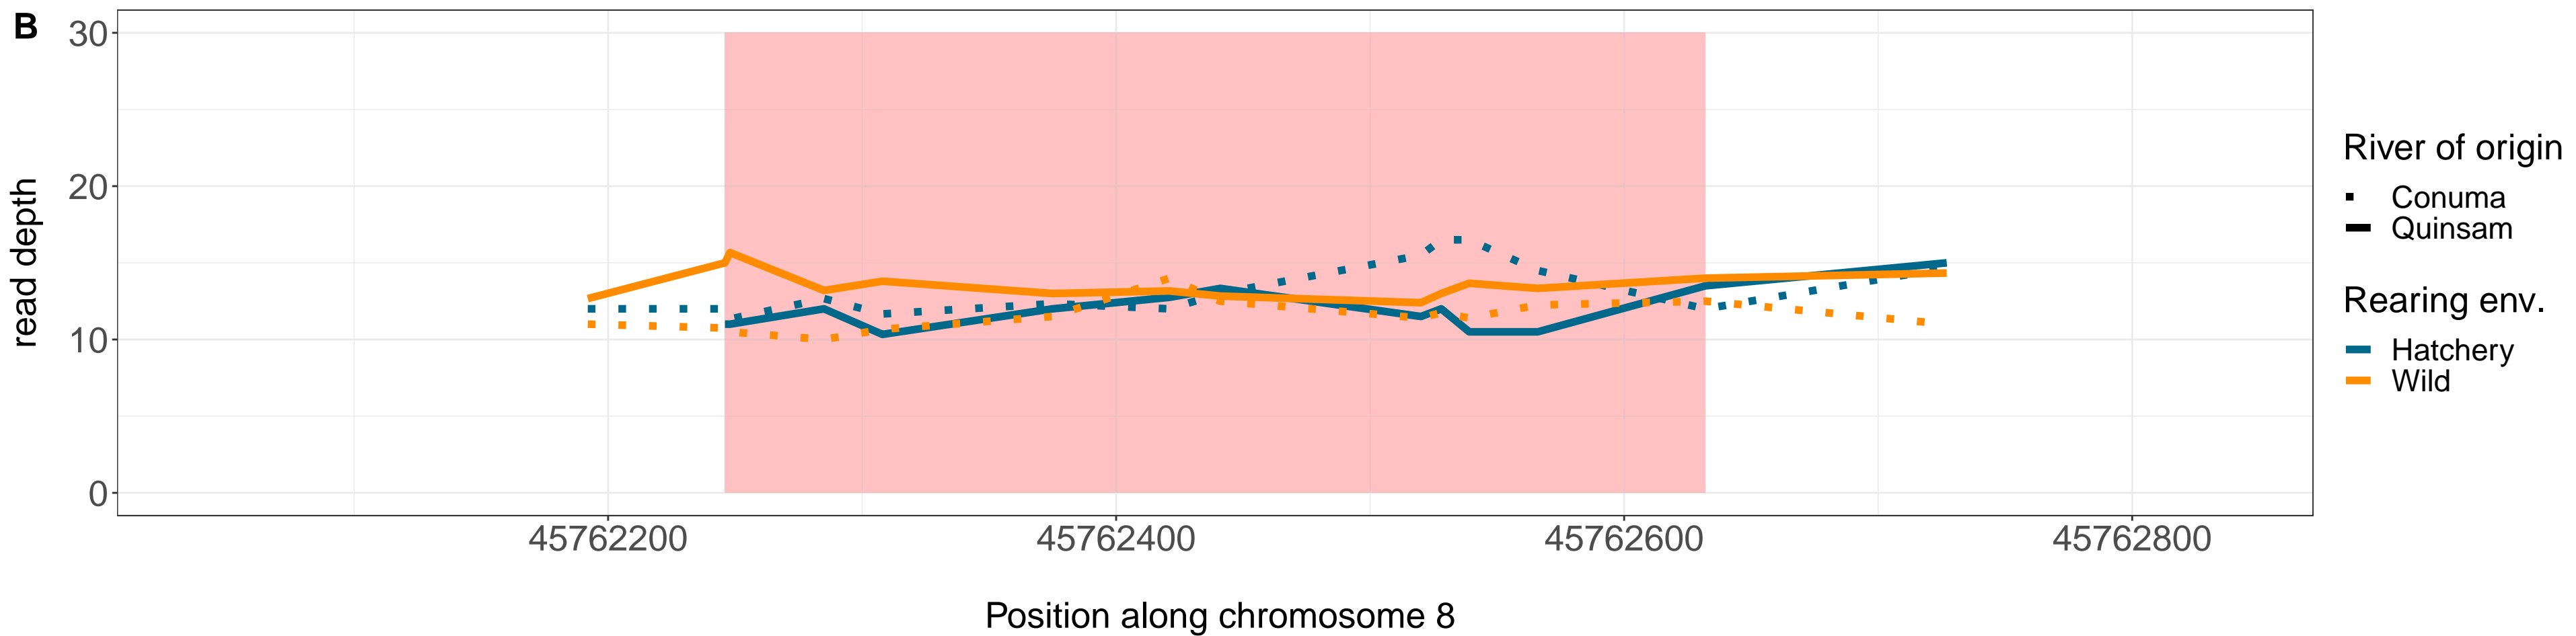



# DMR\_93

XM\_020498556.1

XM\_020498557.1

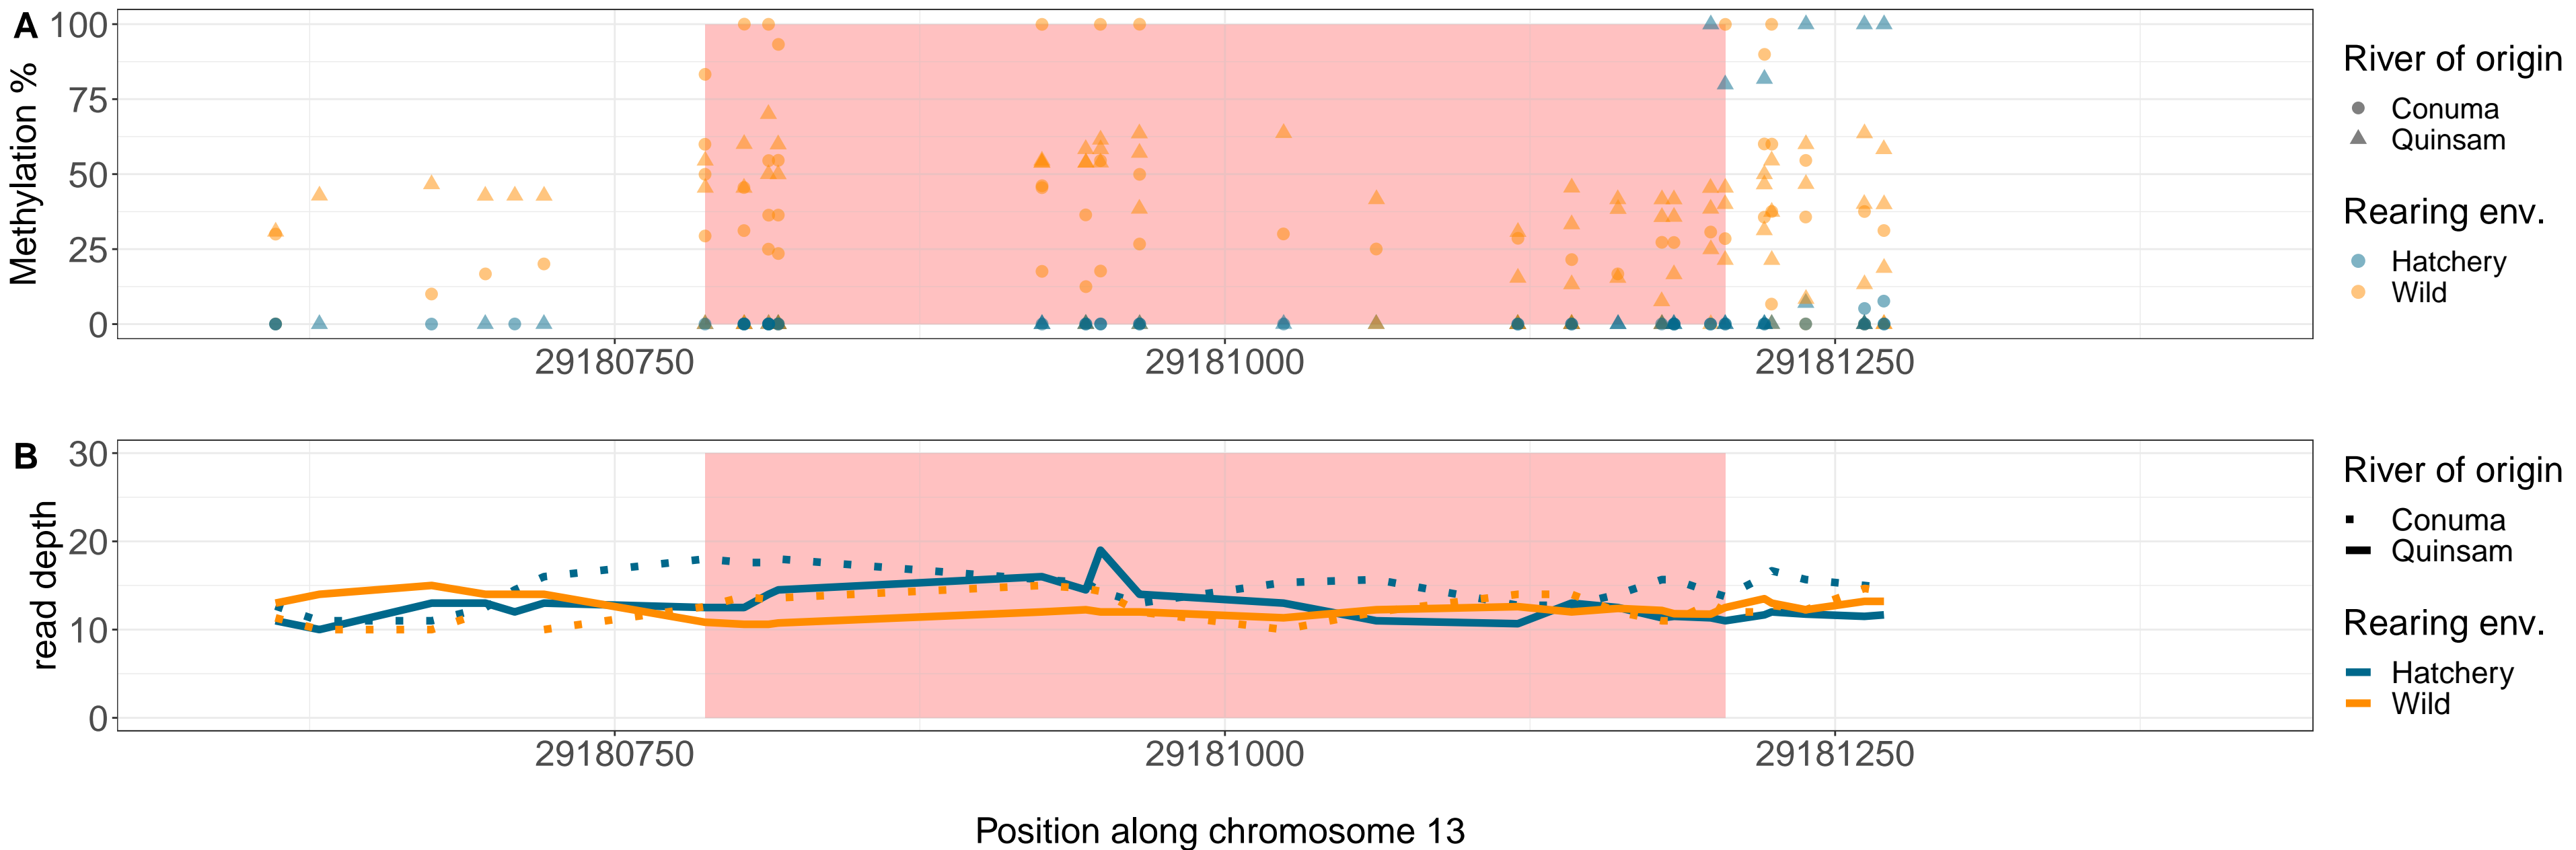

**A**

## DMR\_94

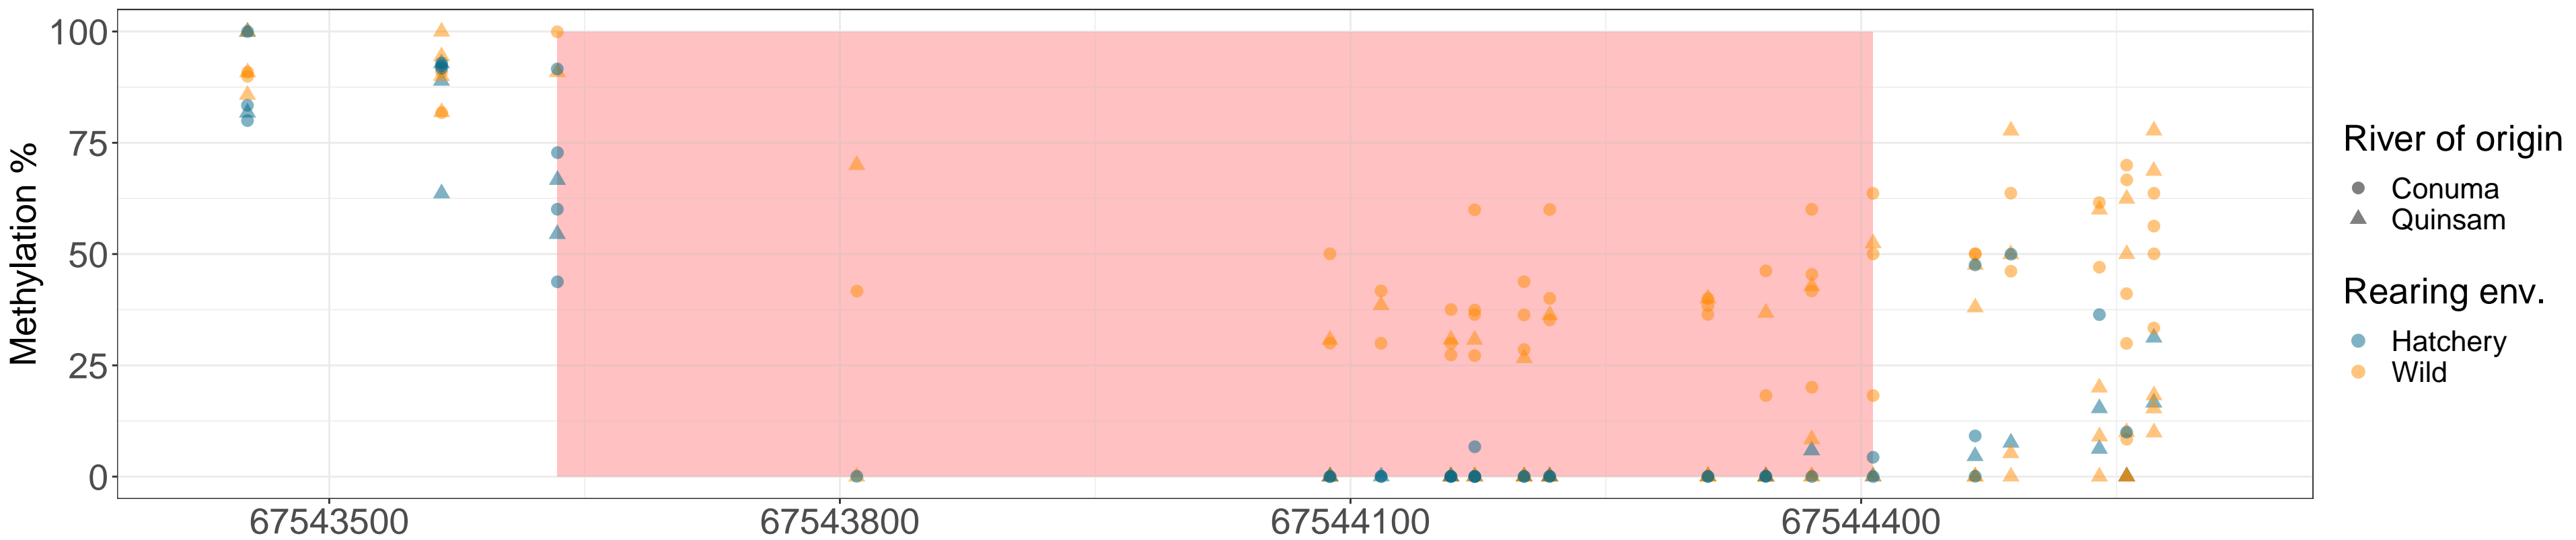**B**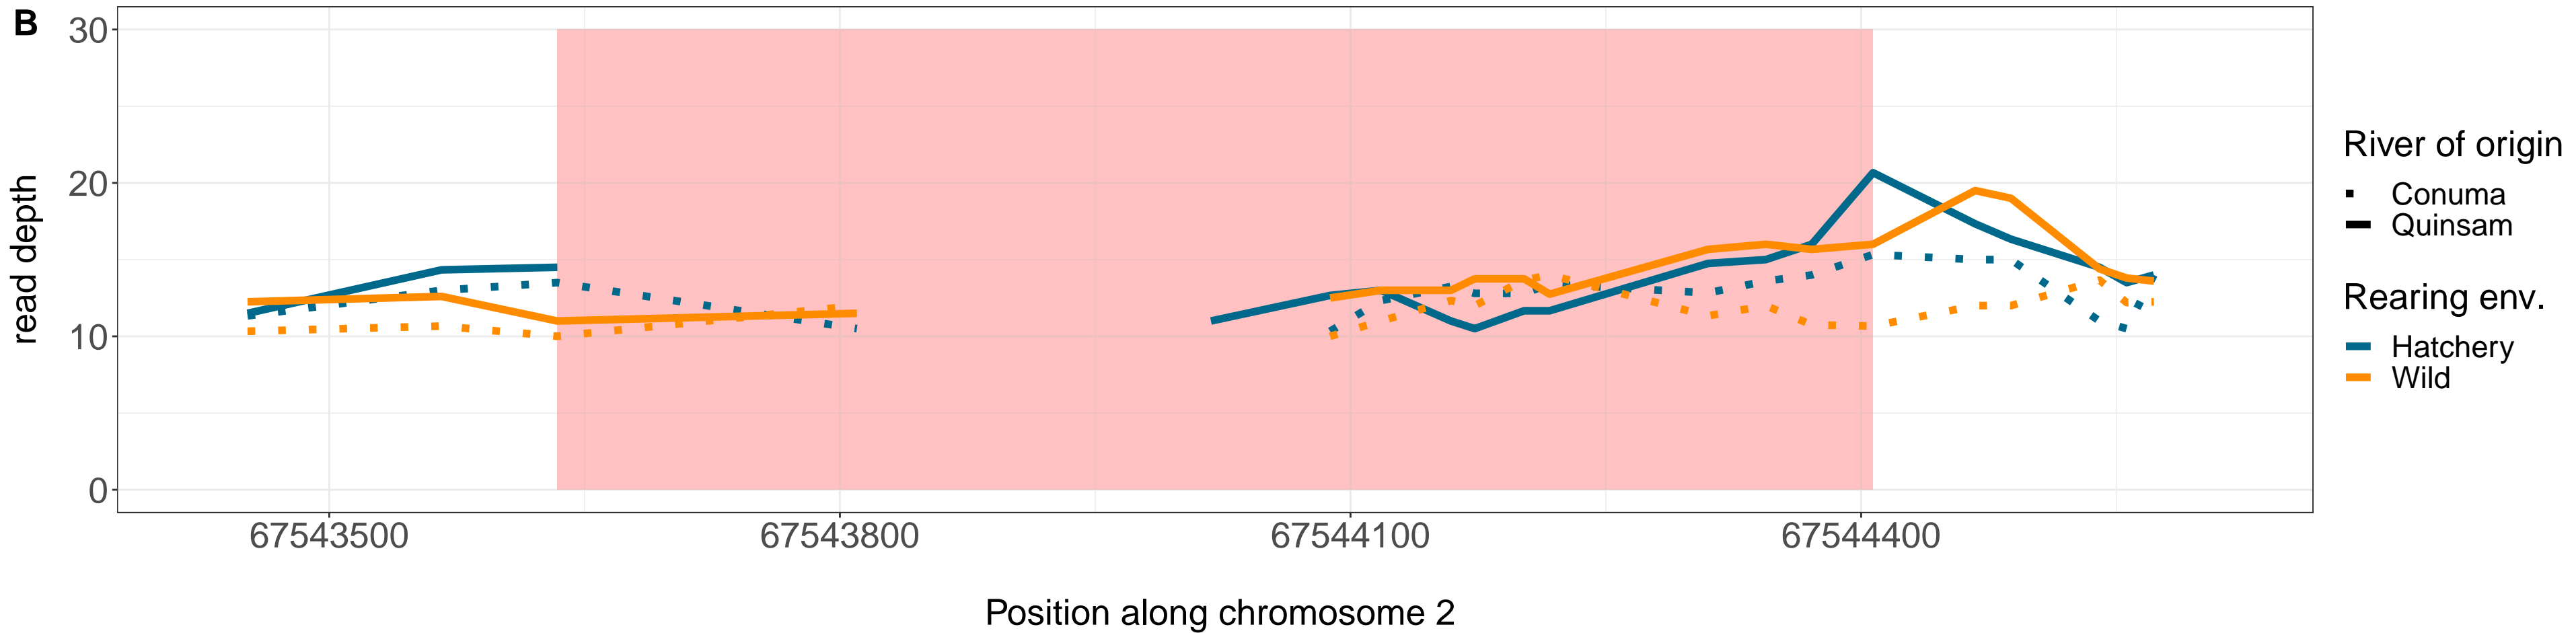

# DMR\_95

XM\_020483674.1

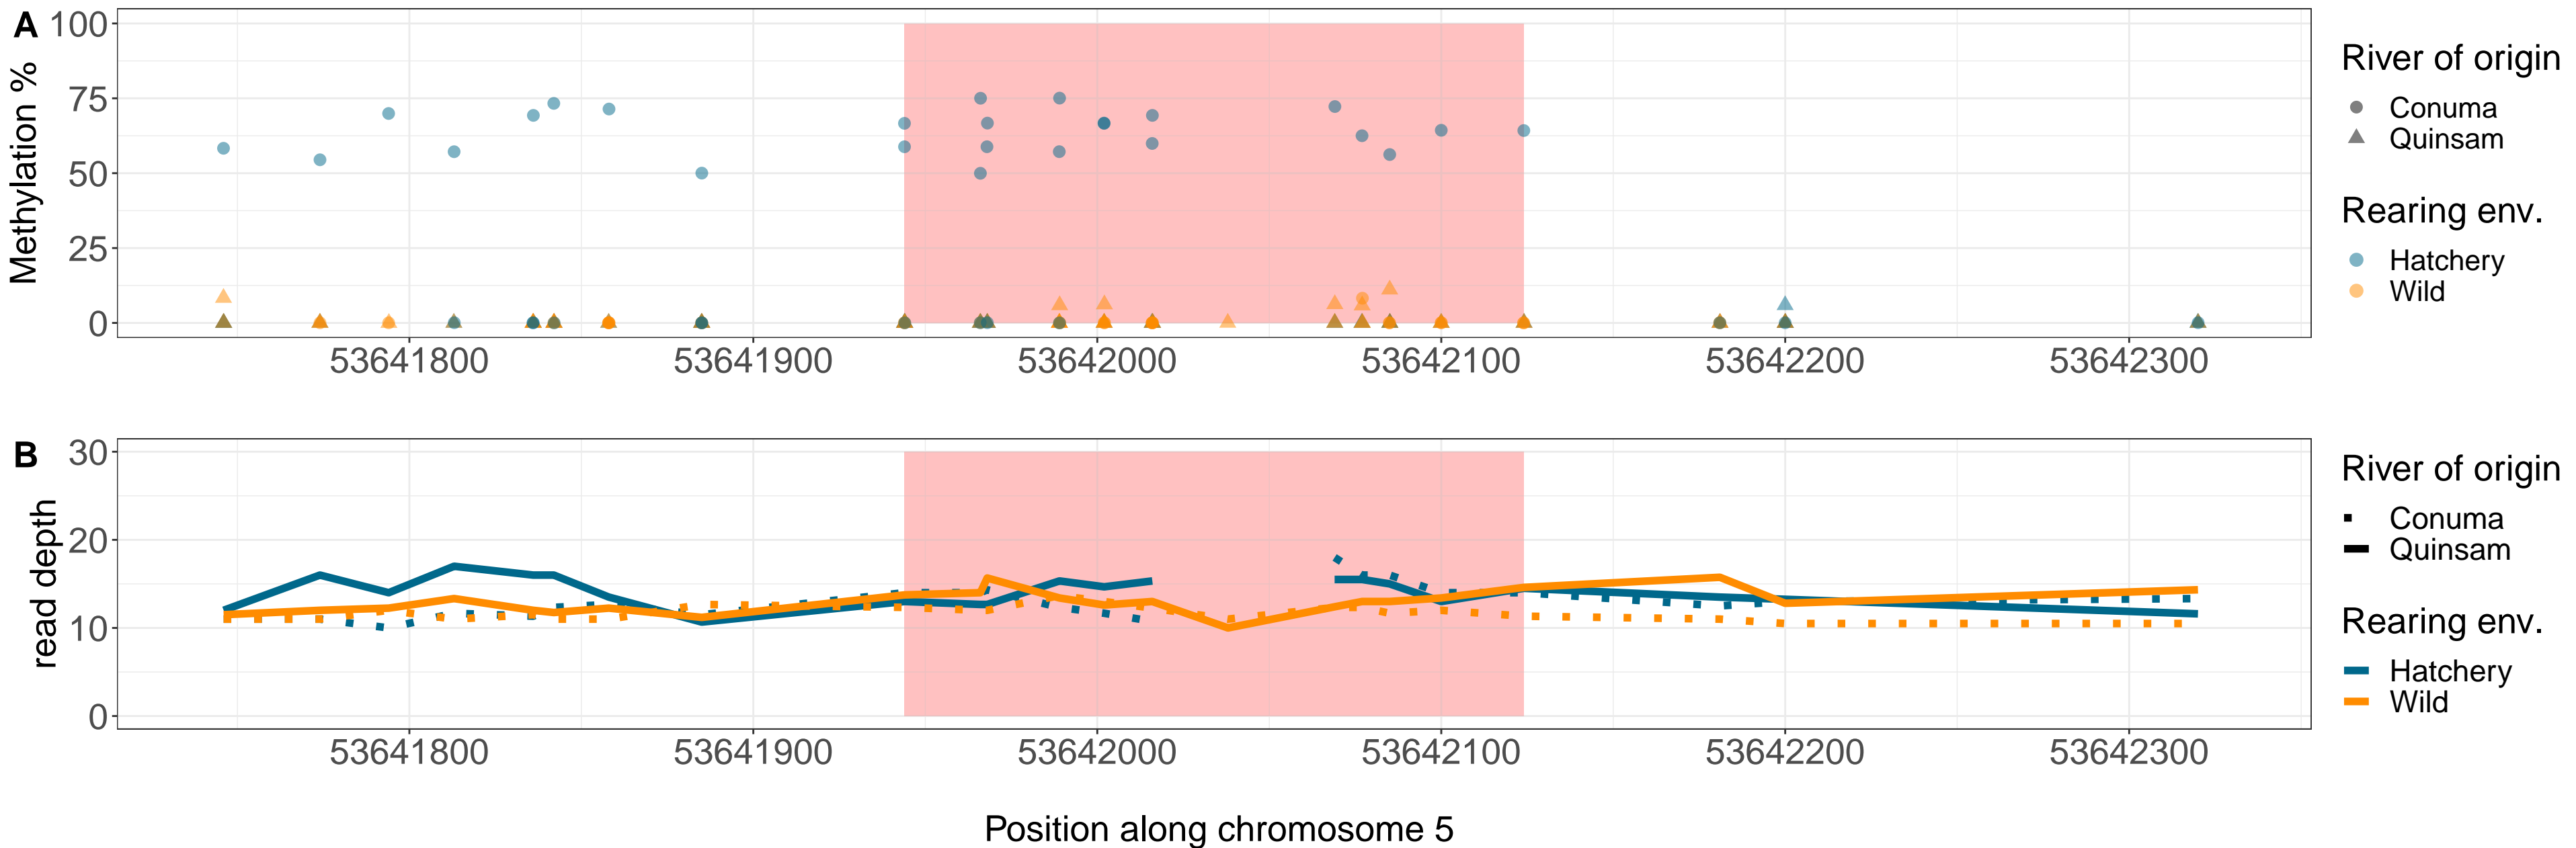

**A**

DMR\_96

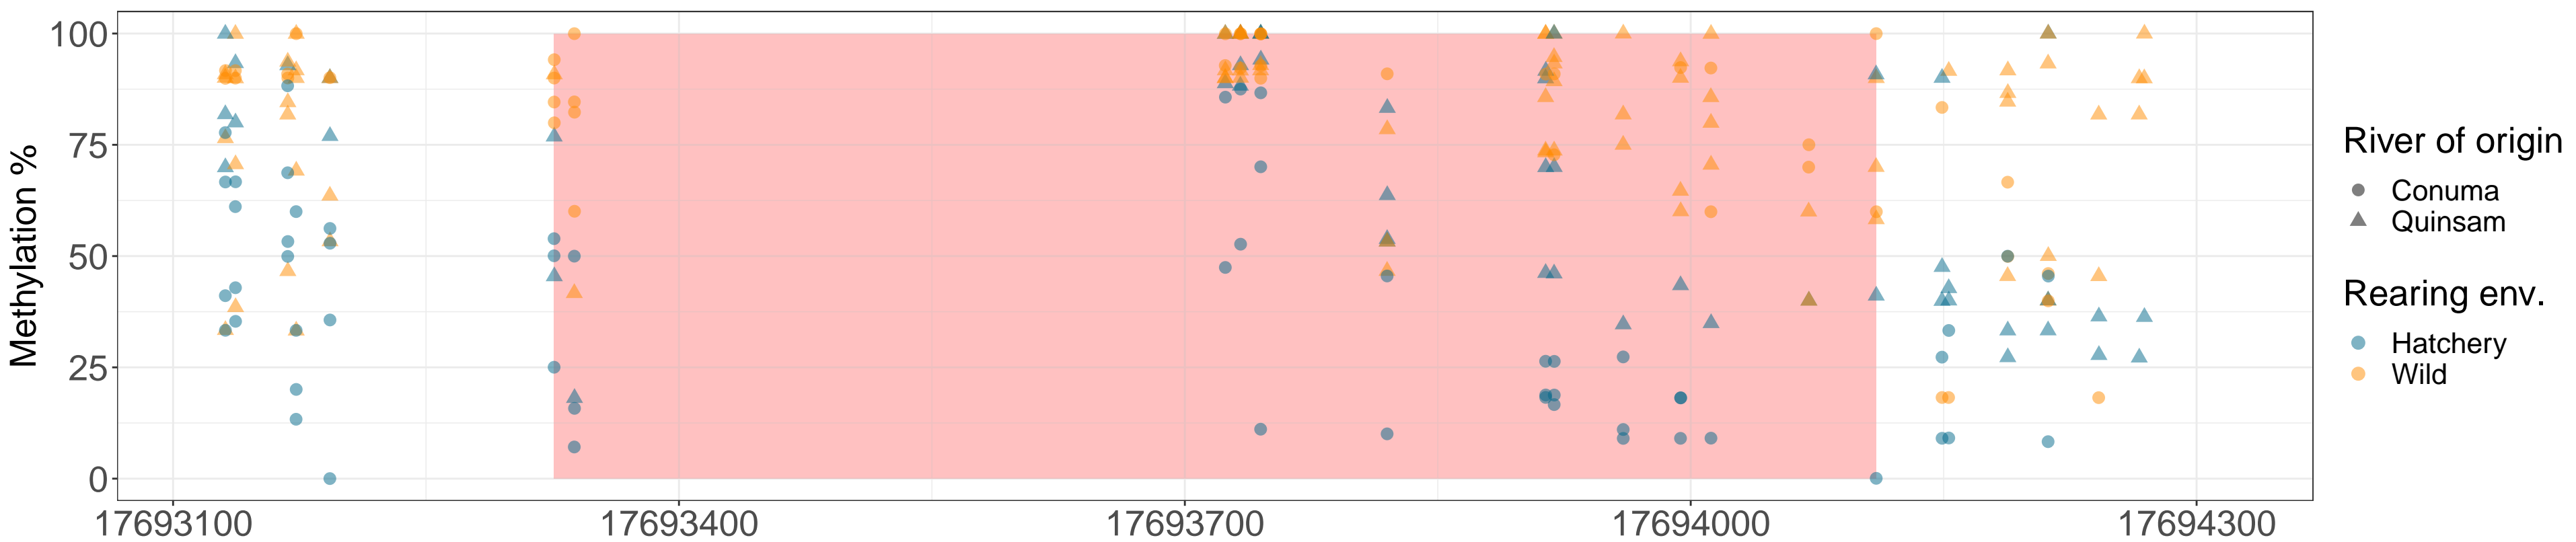**B**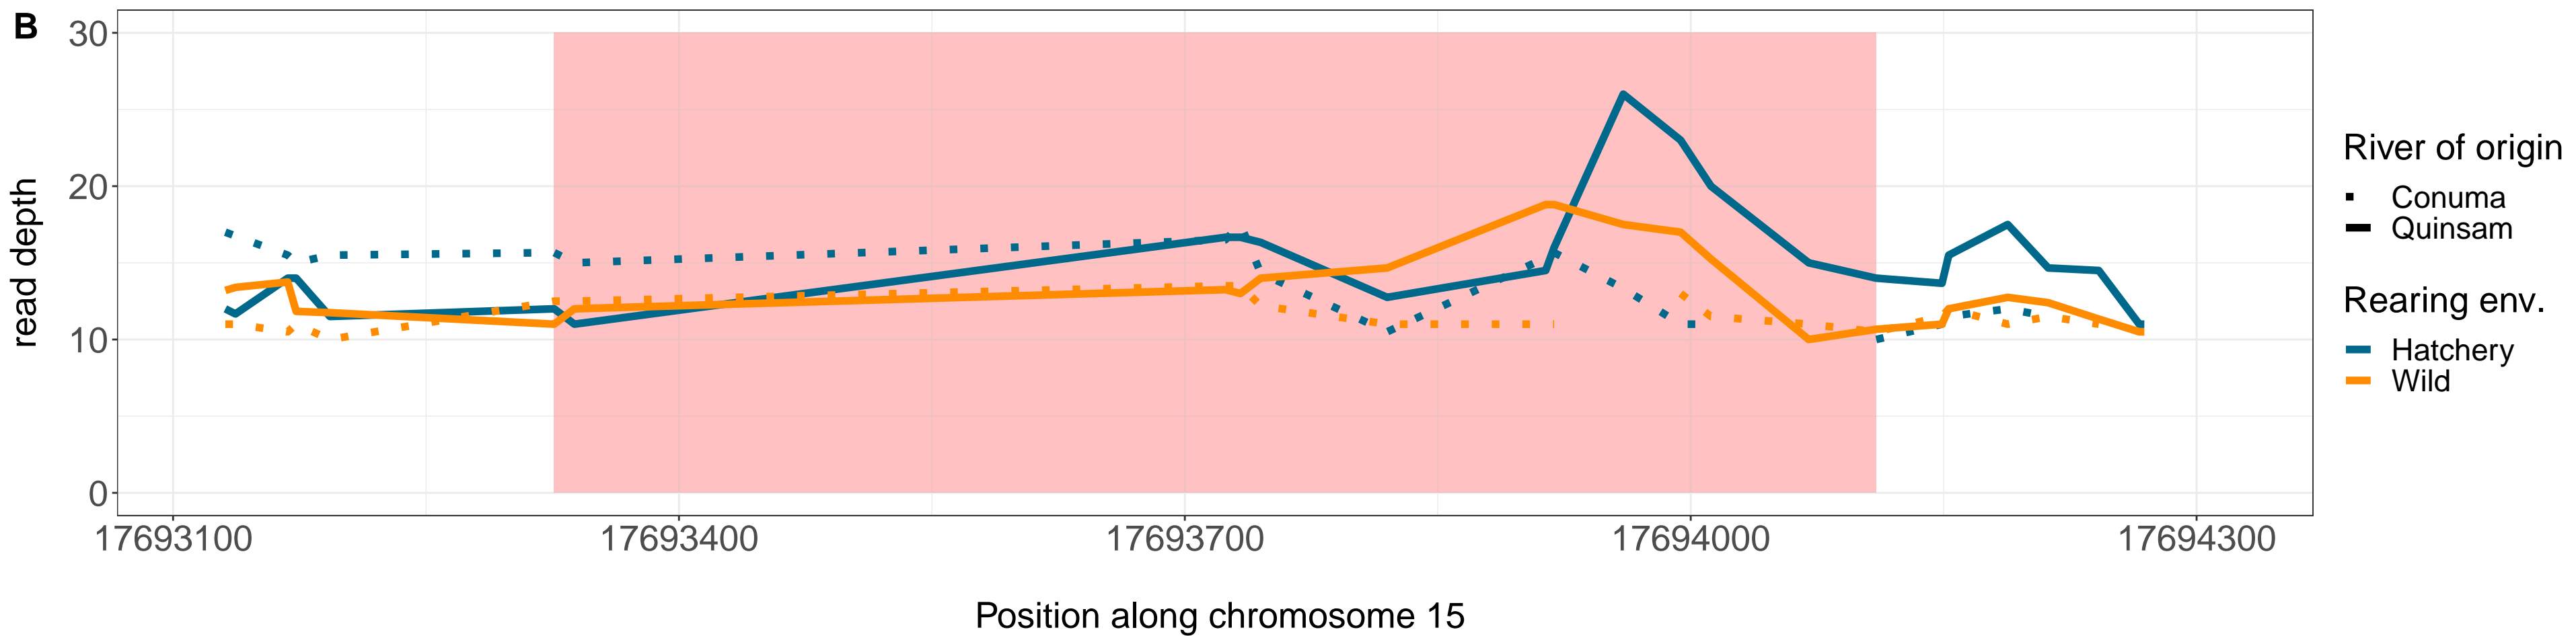

**A**

## DMR\_97

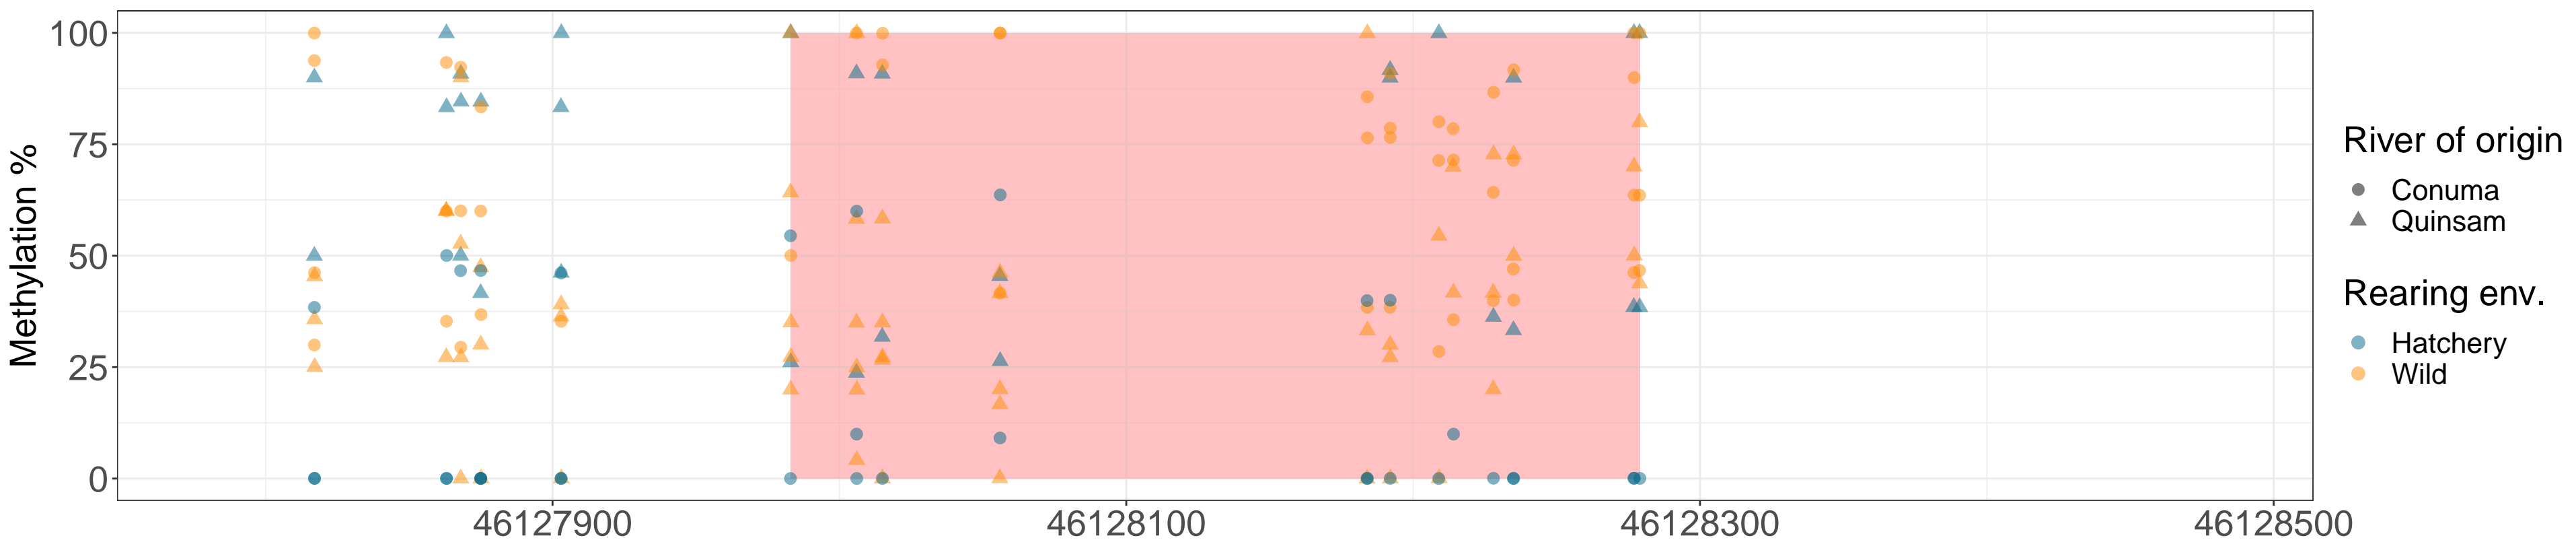**B**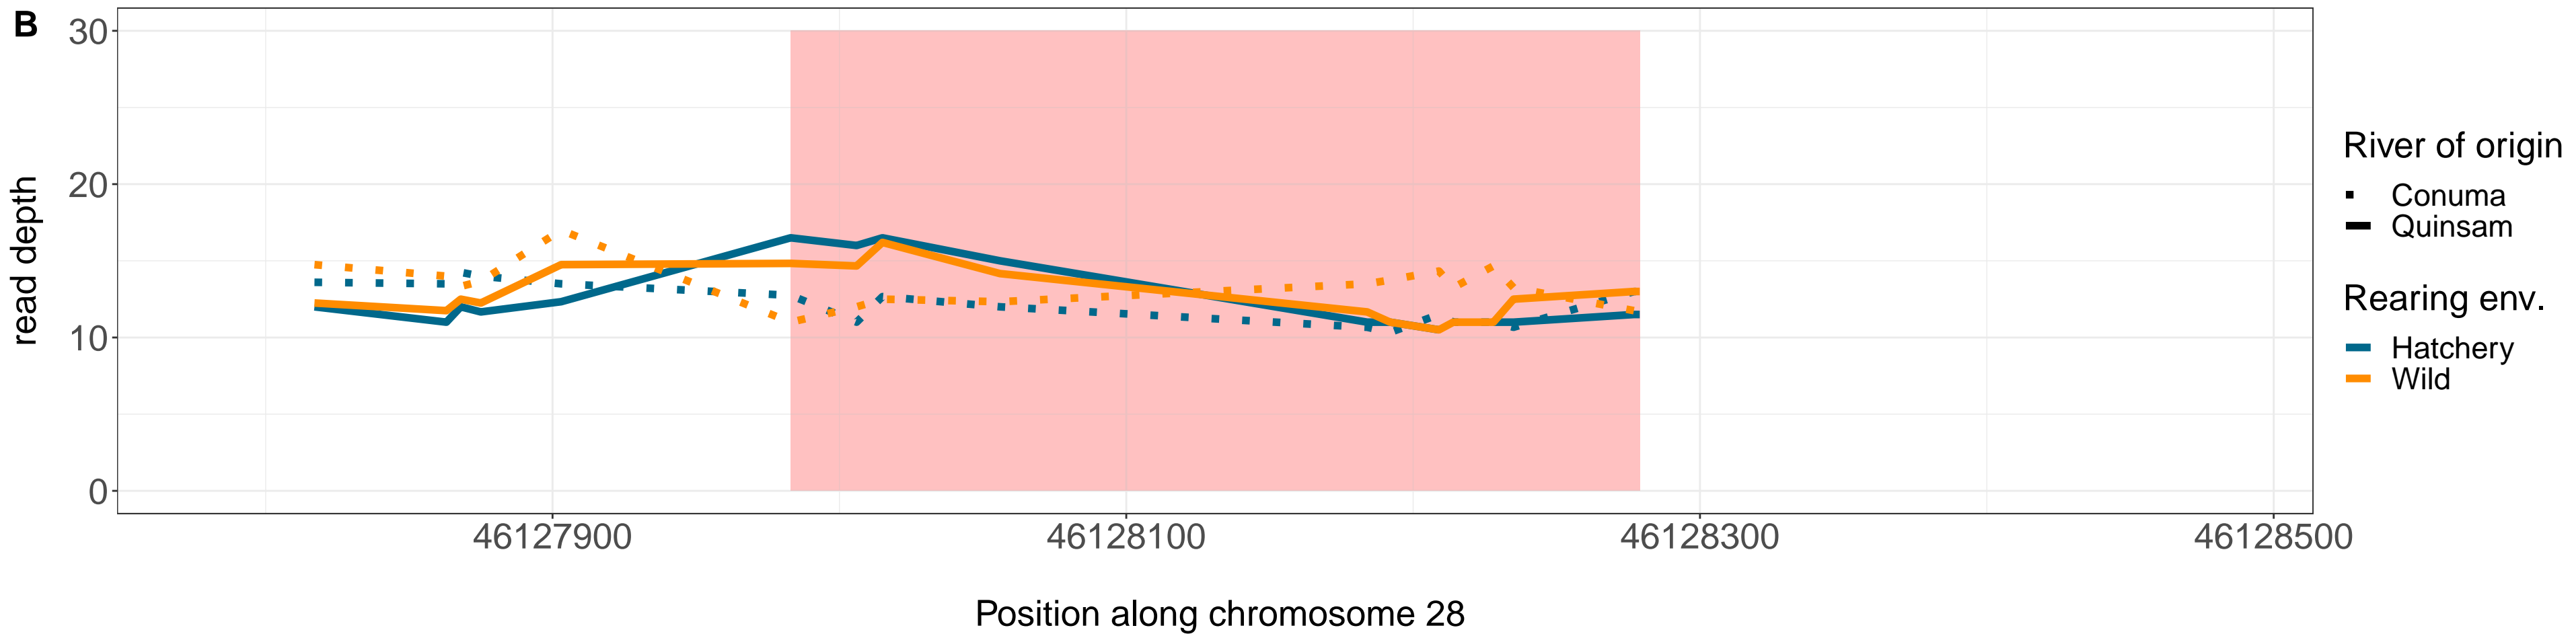

**A**

## DMR\_98

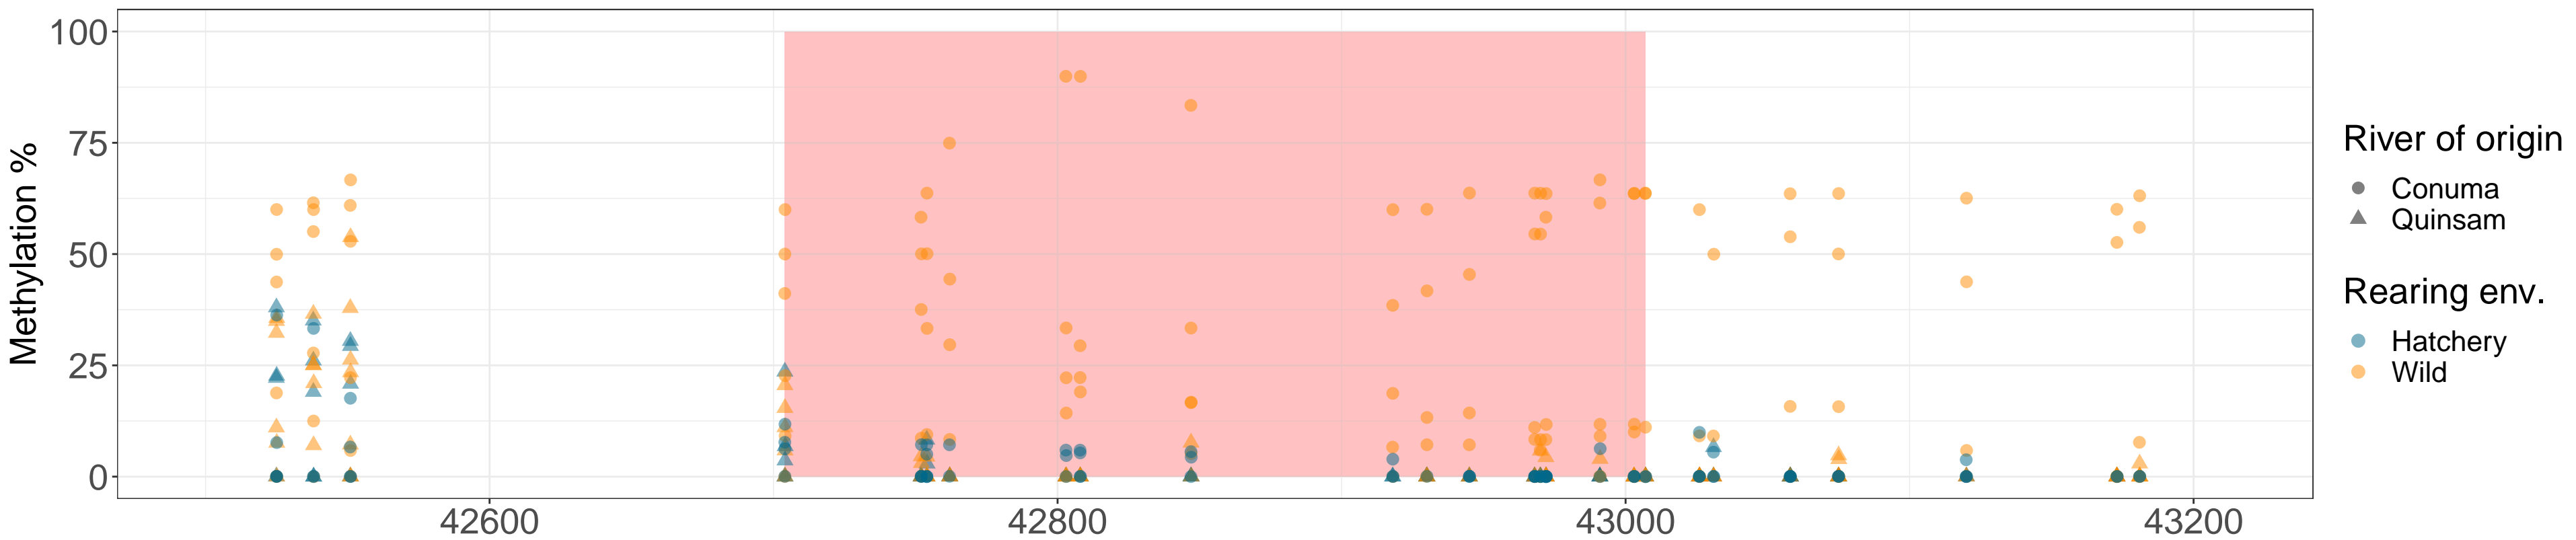**B**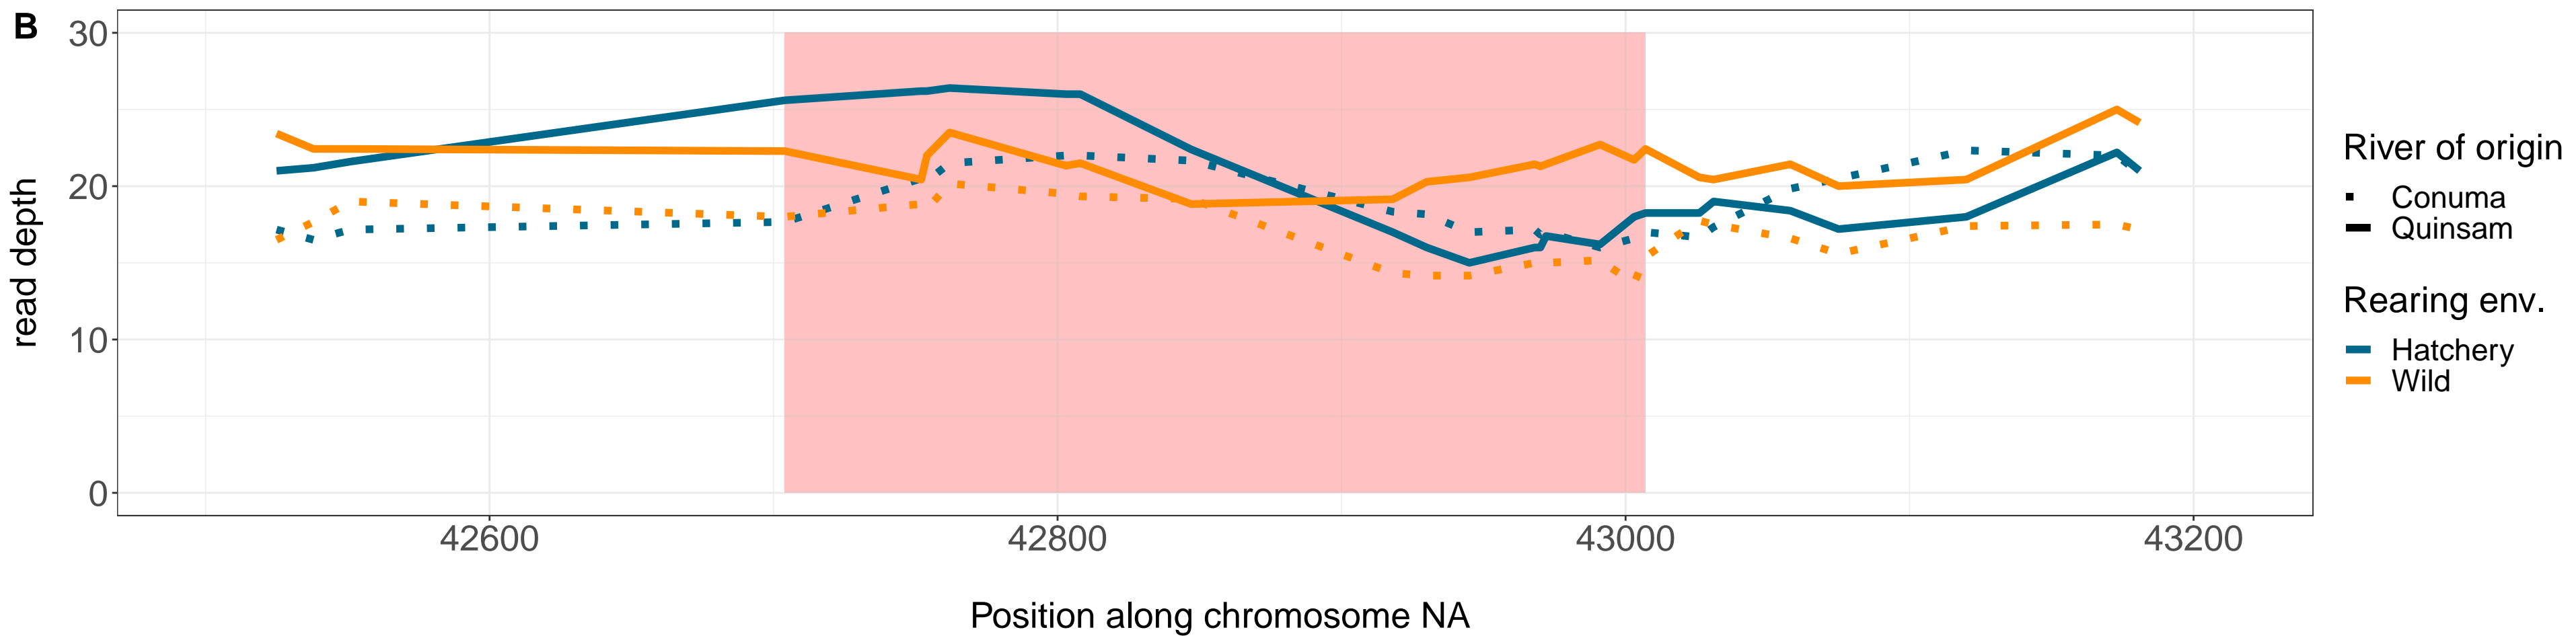

**A**

## DMR\_99

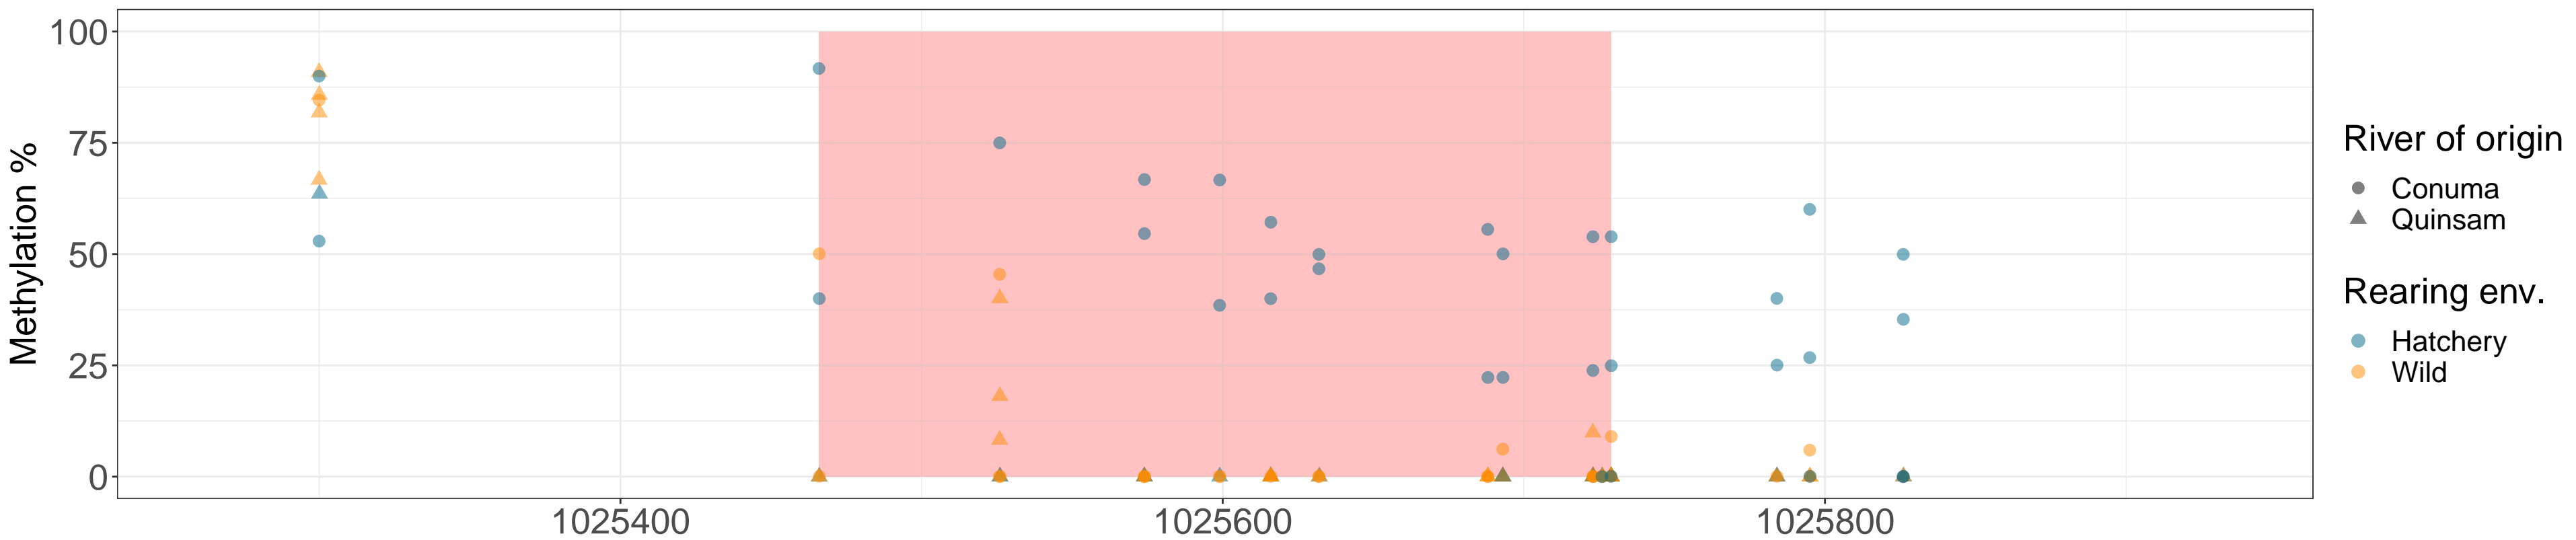**B**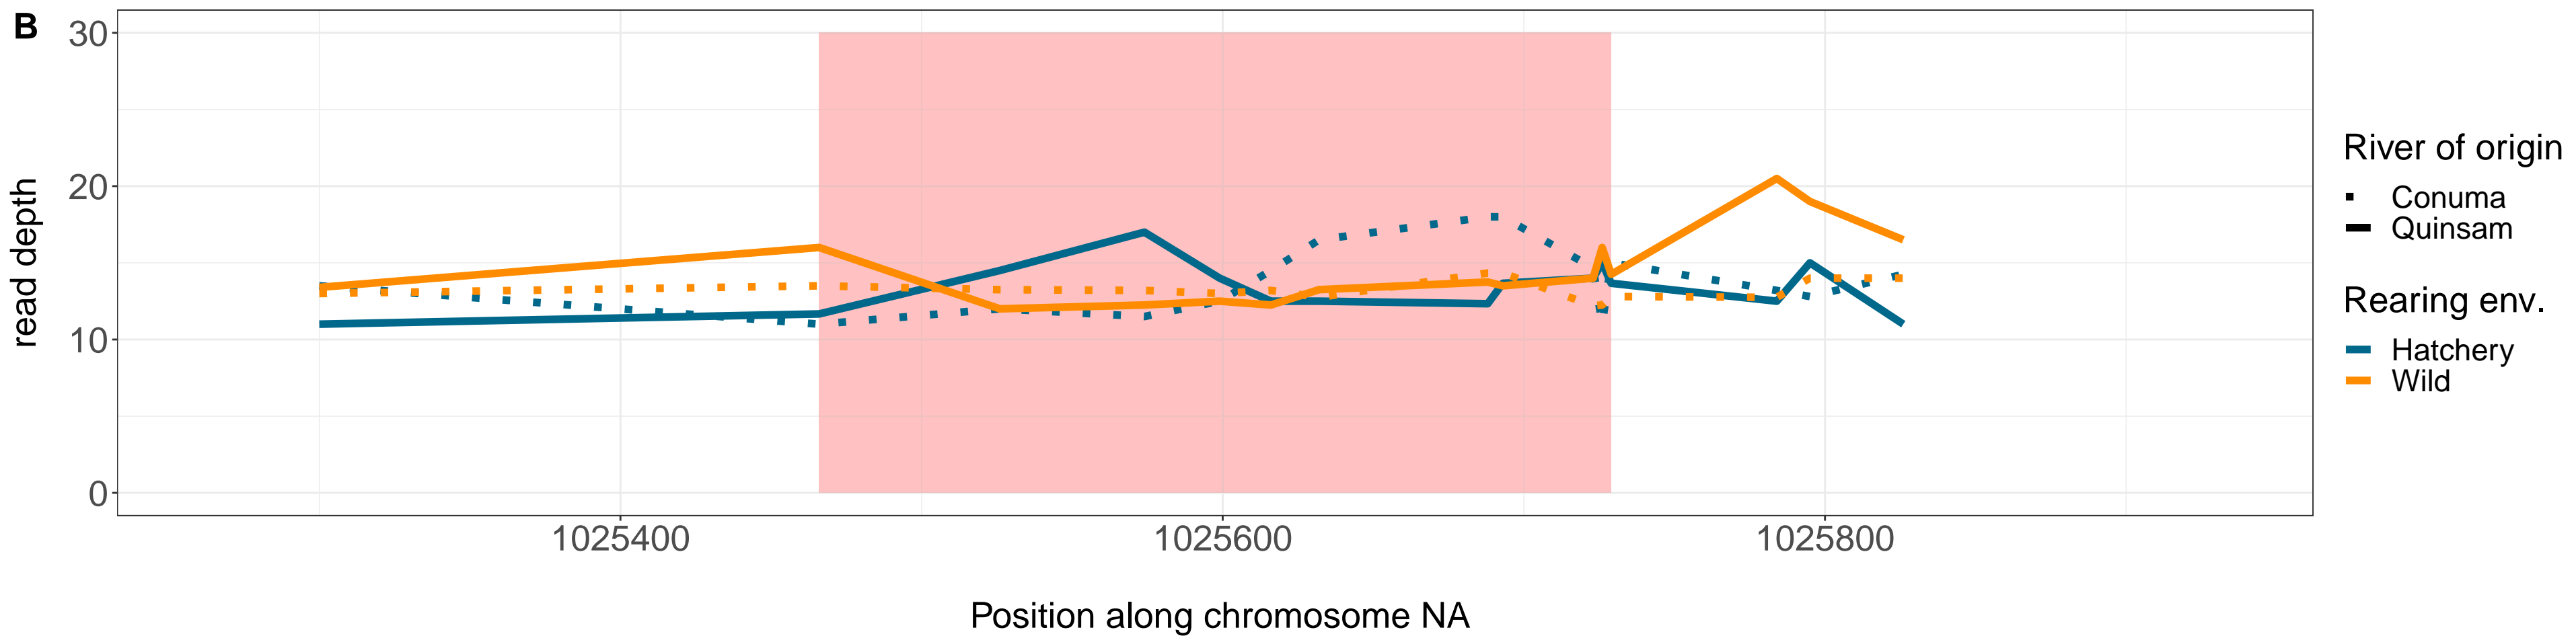

**A**

## DMR\_100

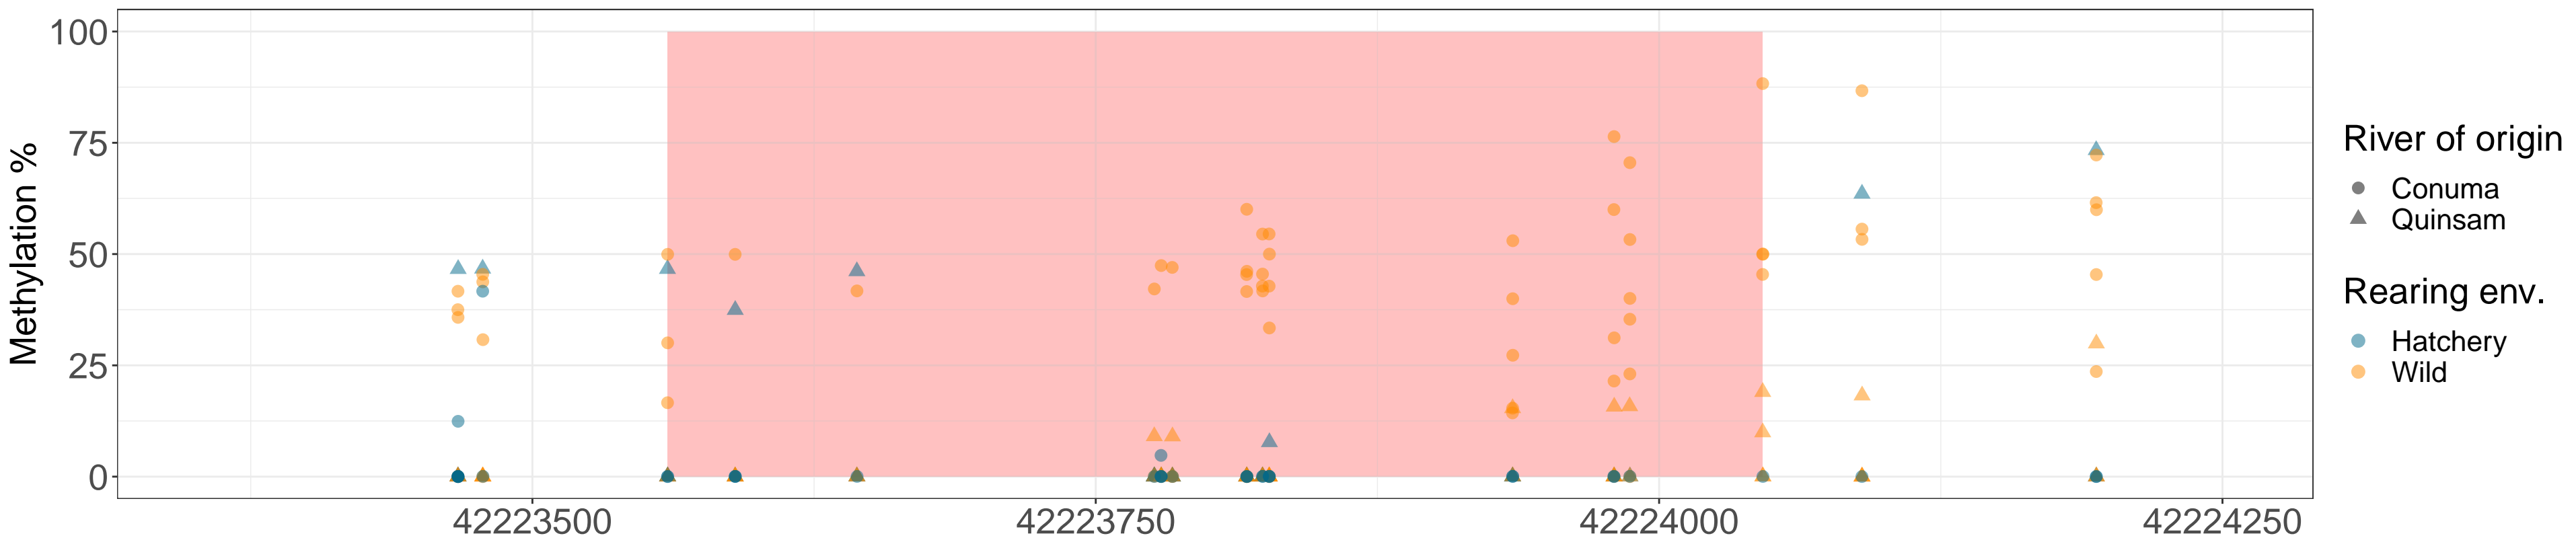**B**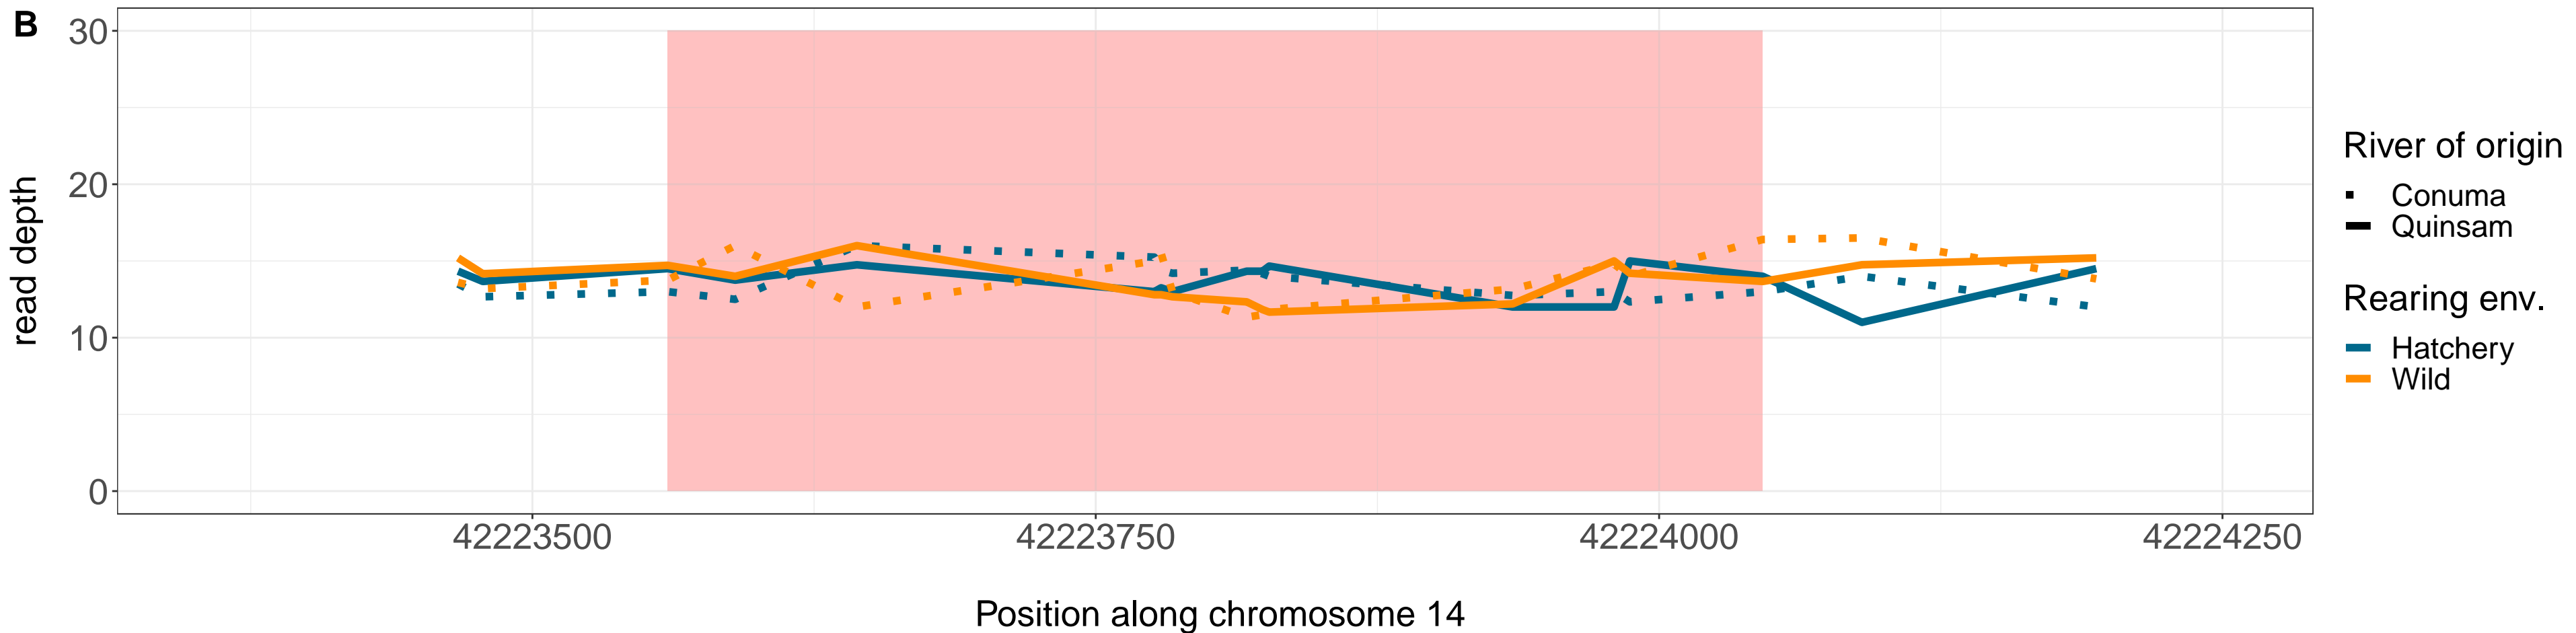



**A**

## DMR\_101

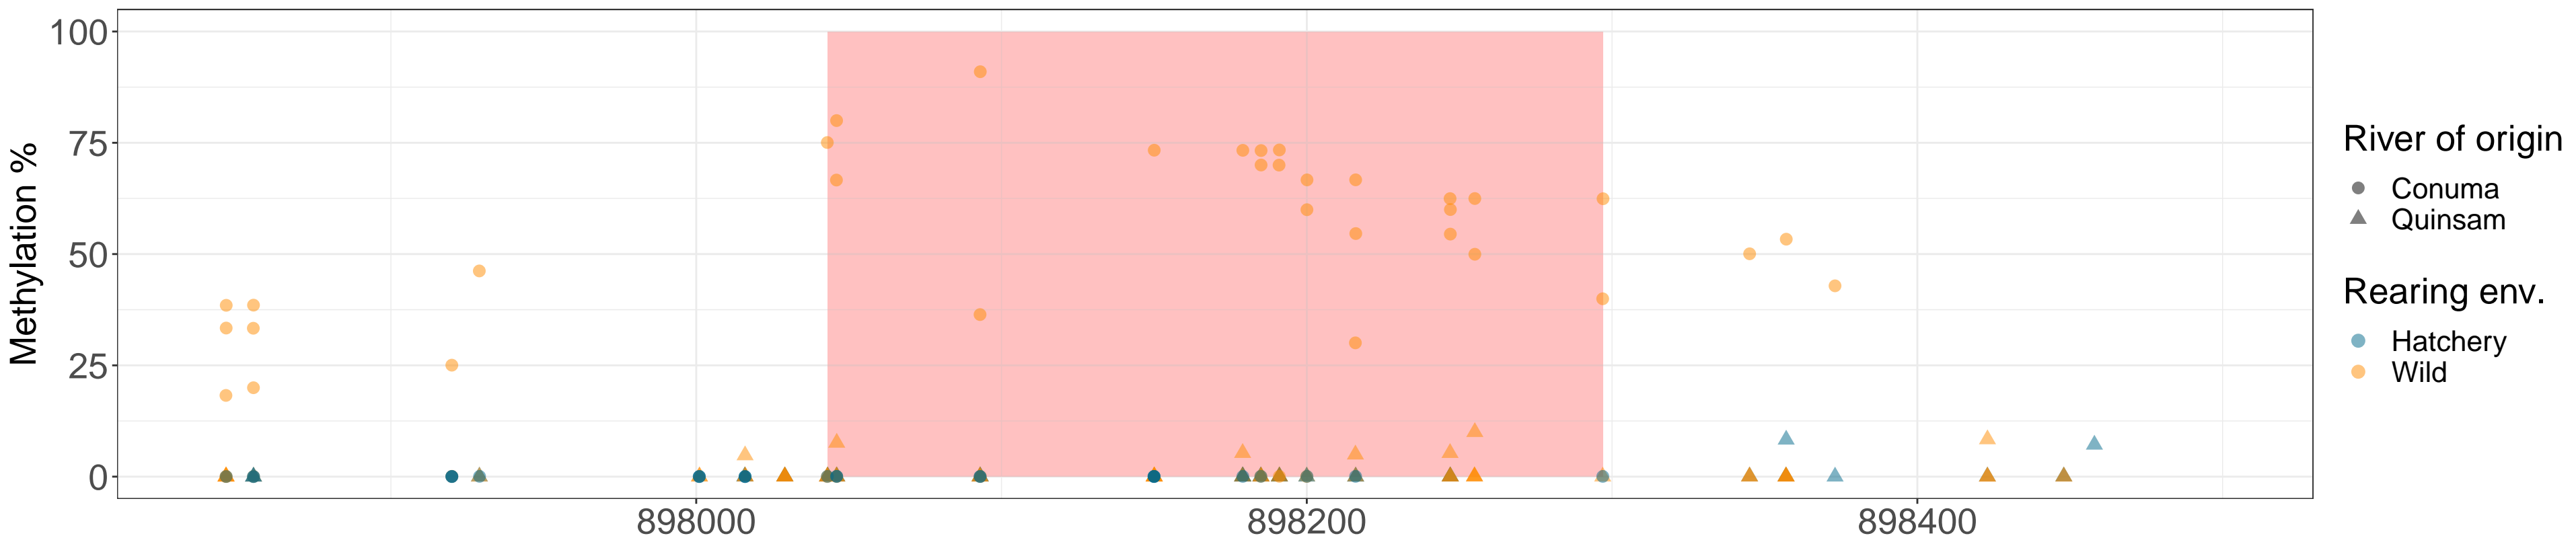**B**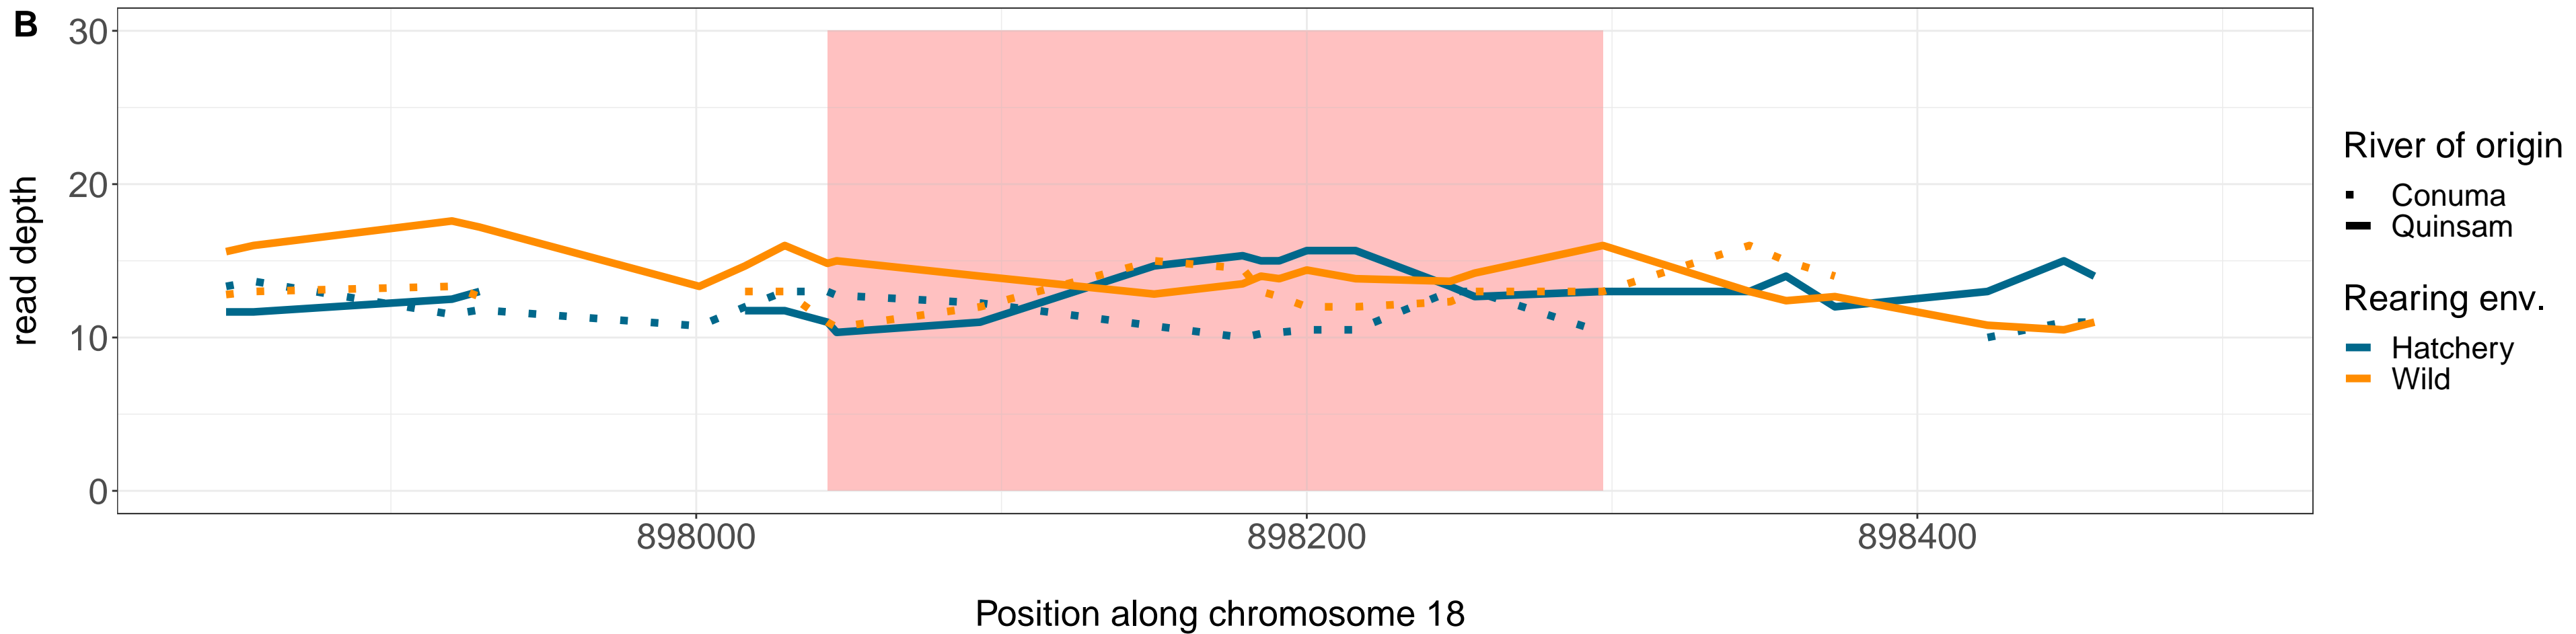

# DMR\_102

XM\_020468255.1

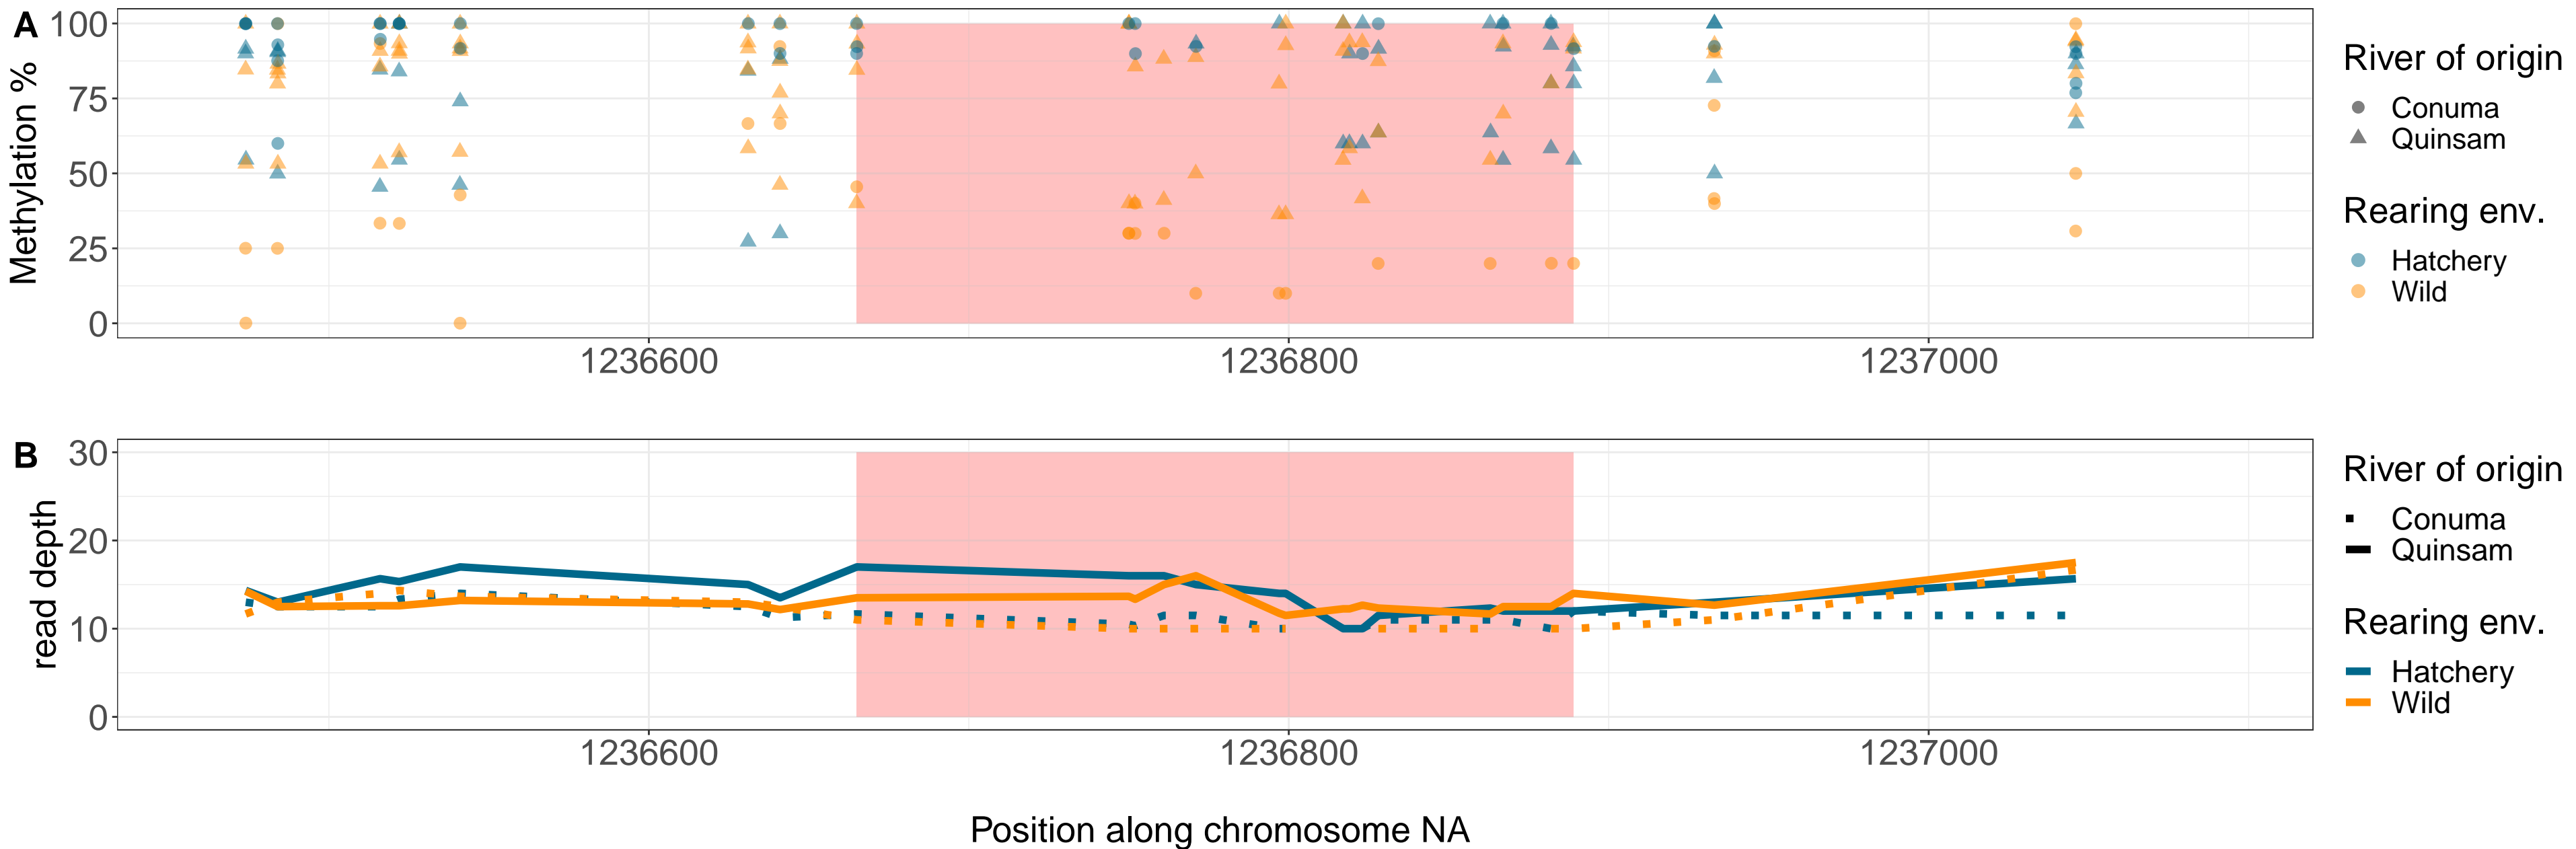

**A**

## DMR\_103

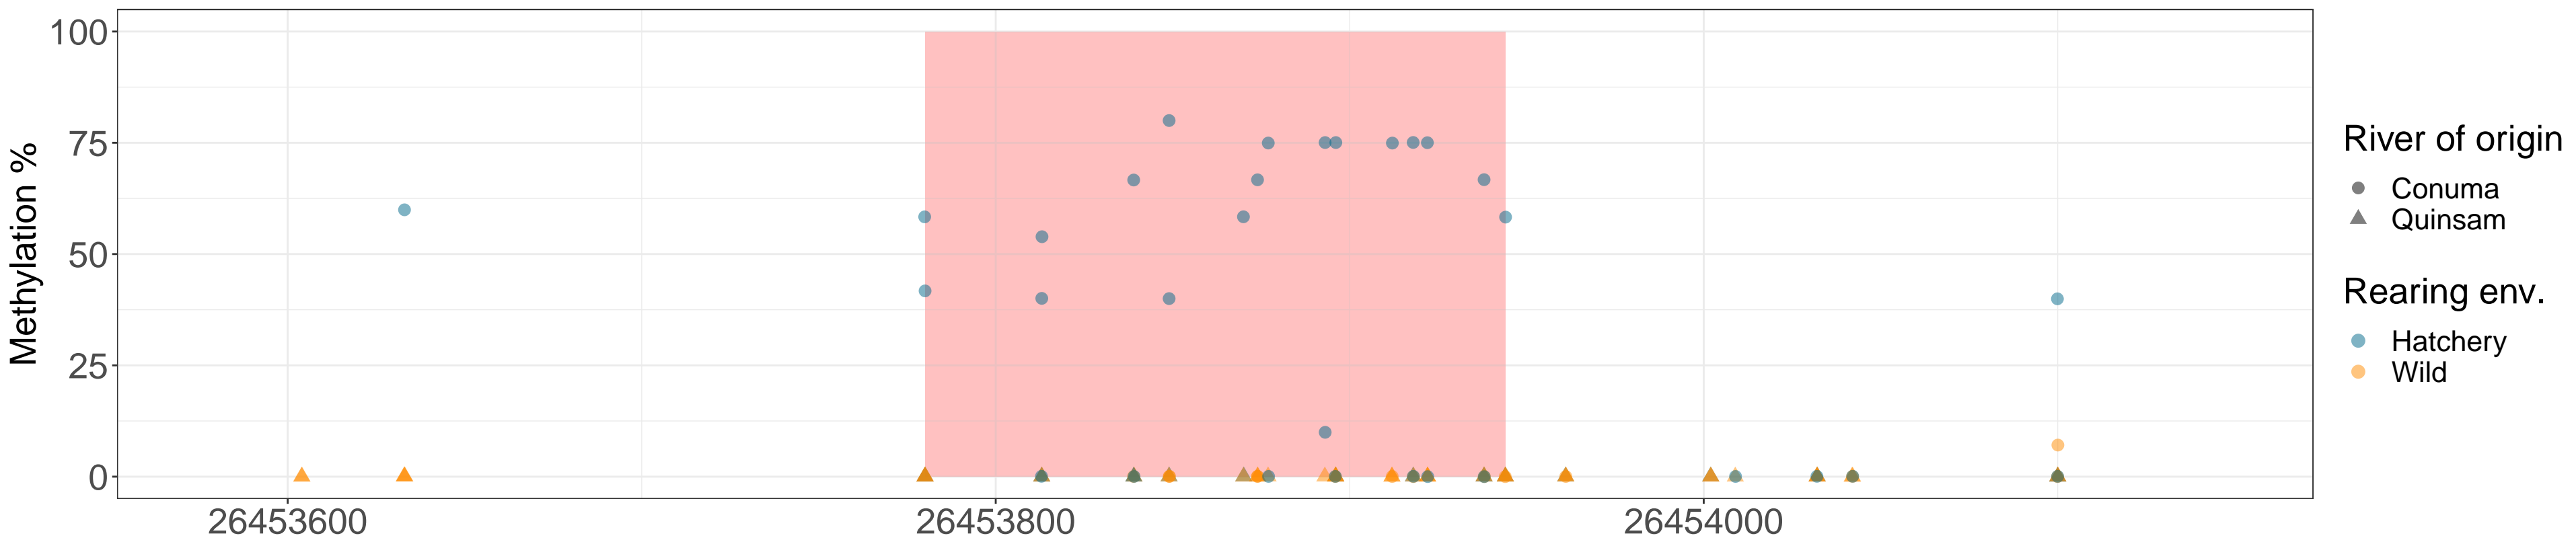**B**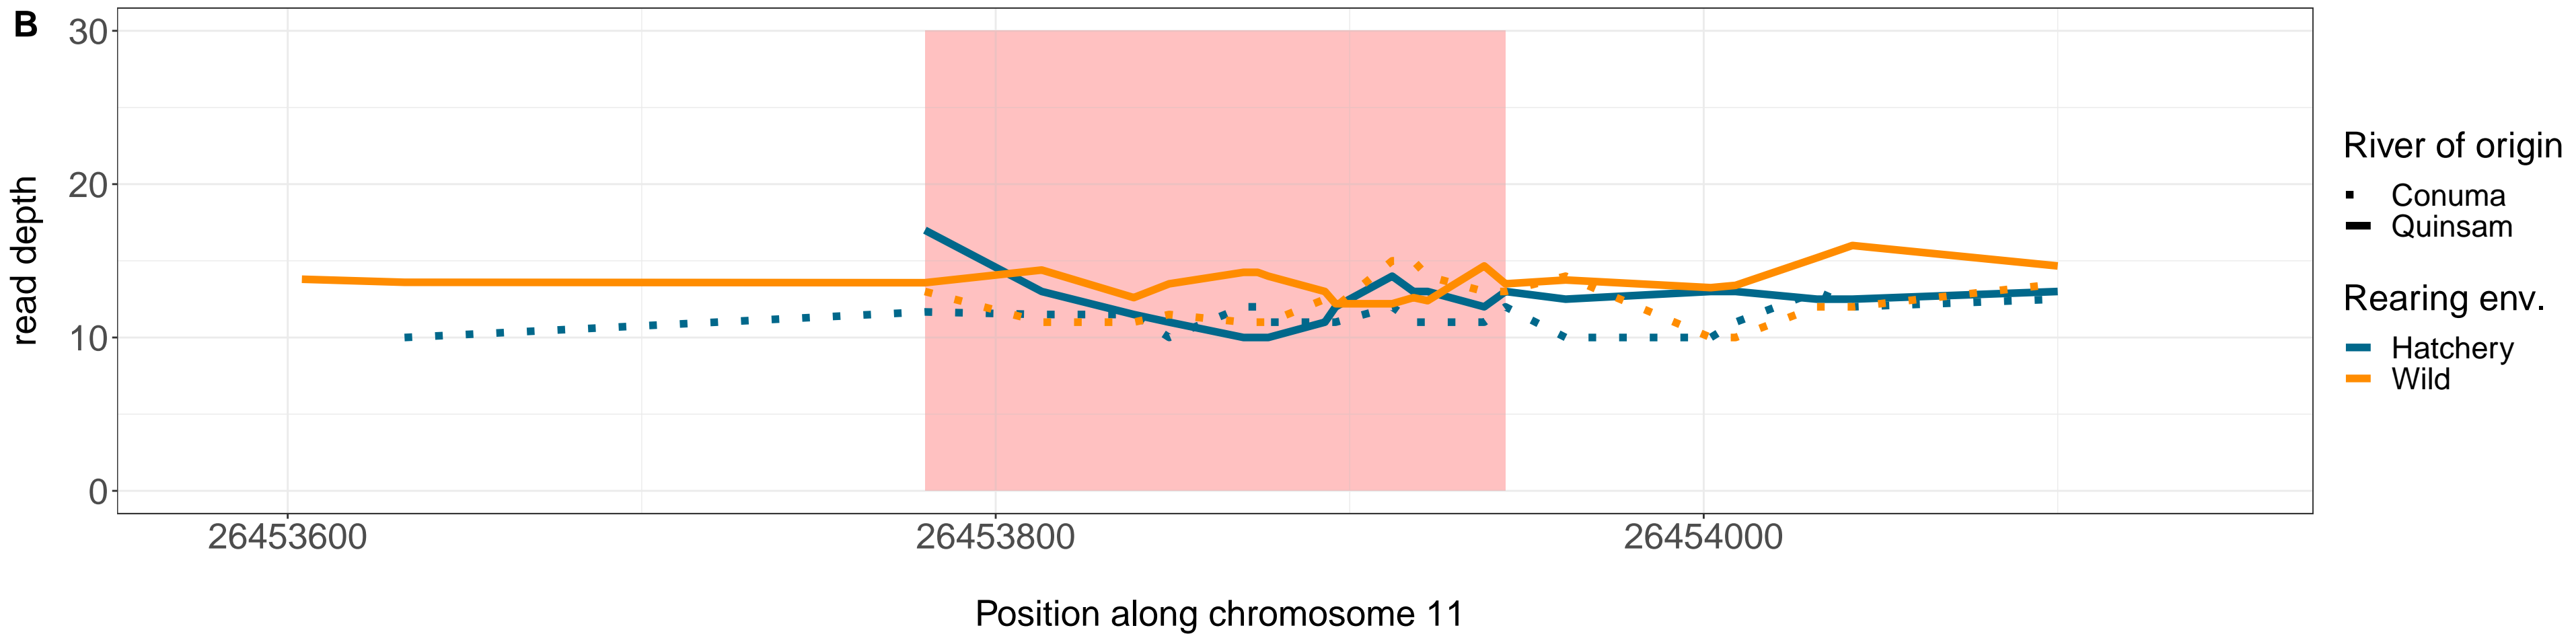

**A**

## DMR\_104

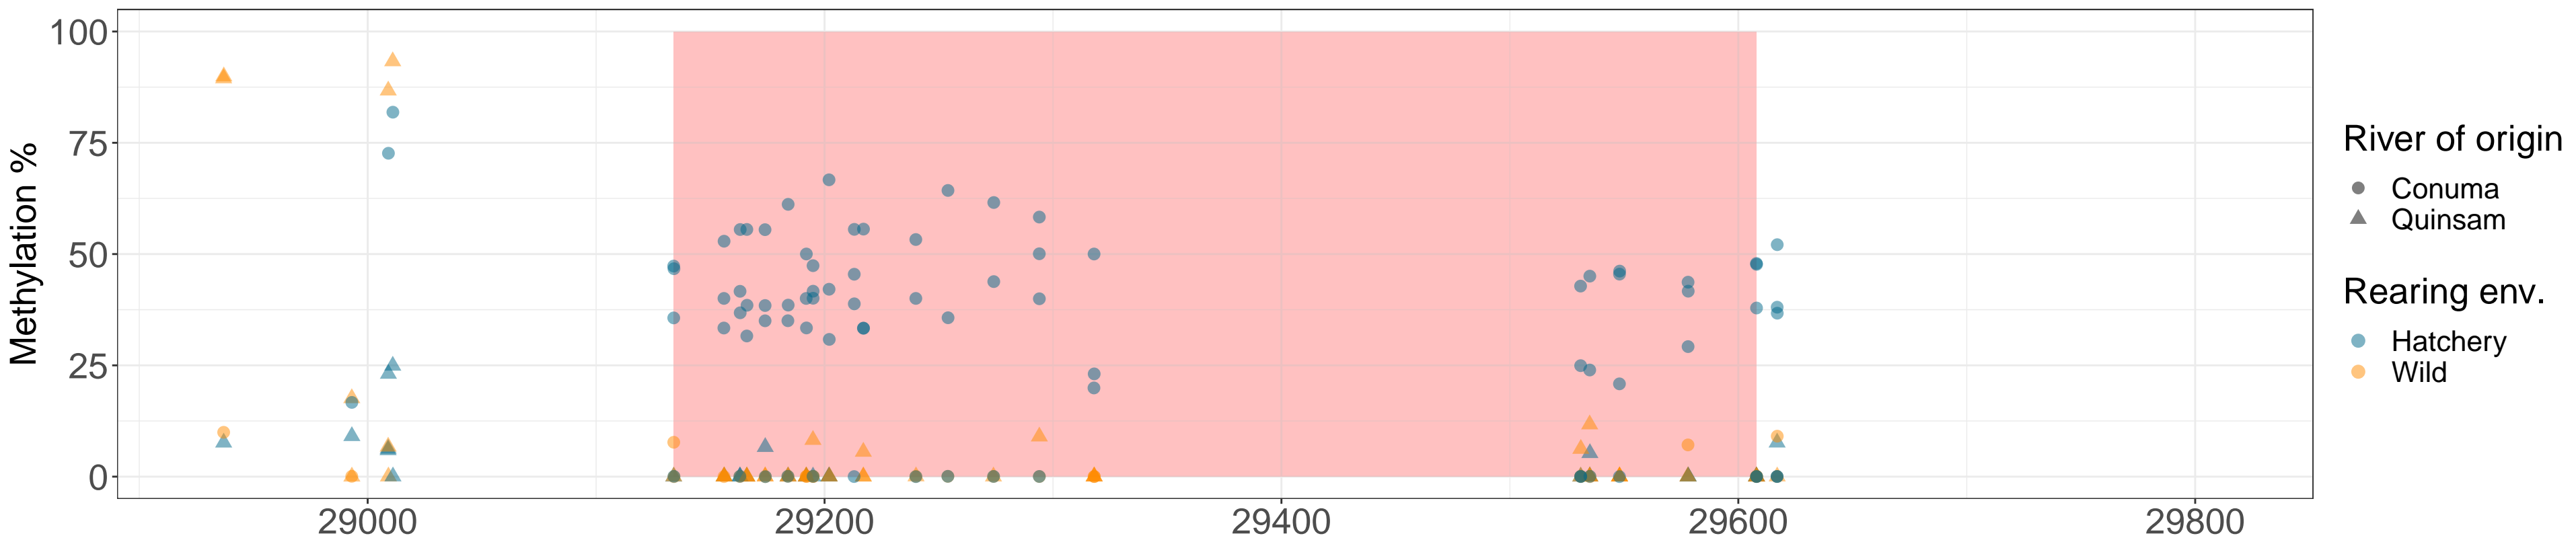**B**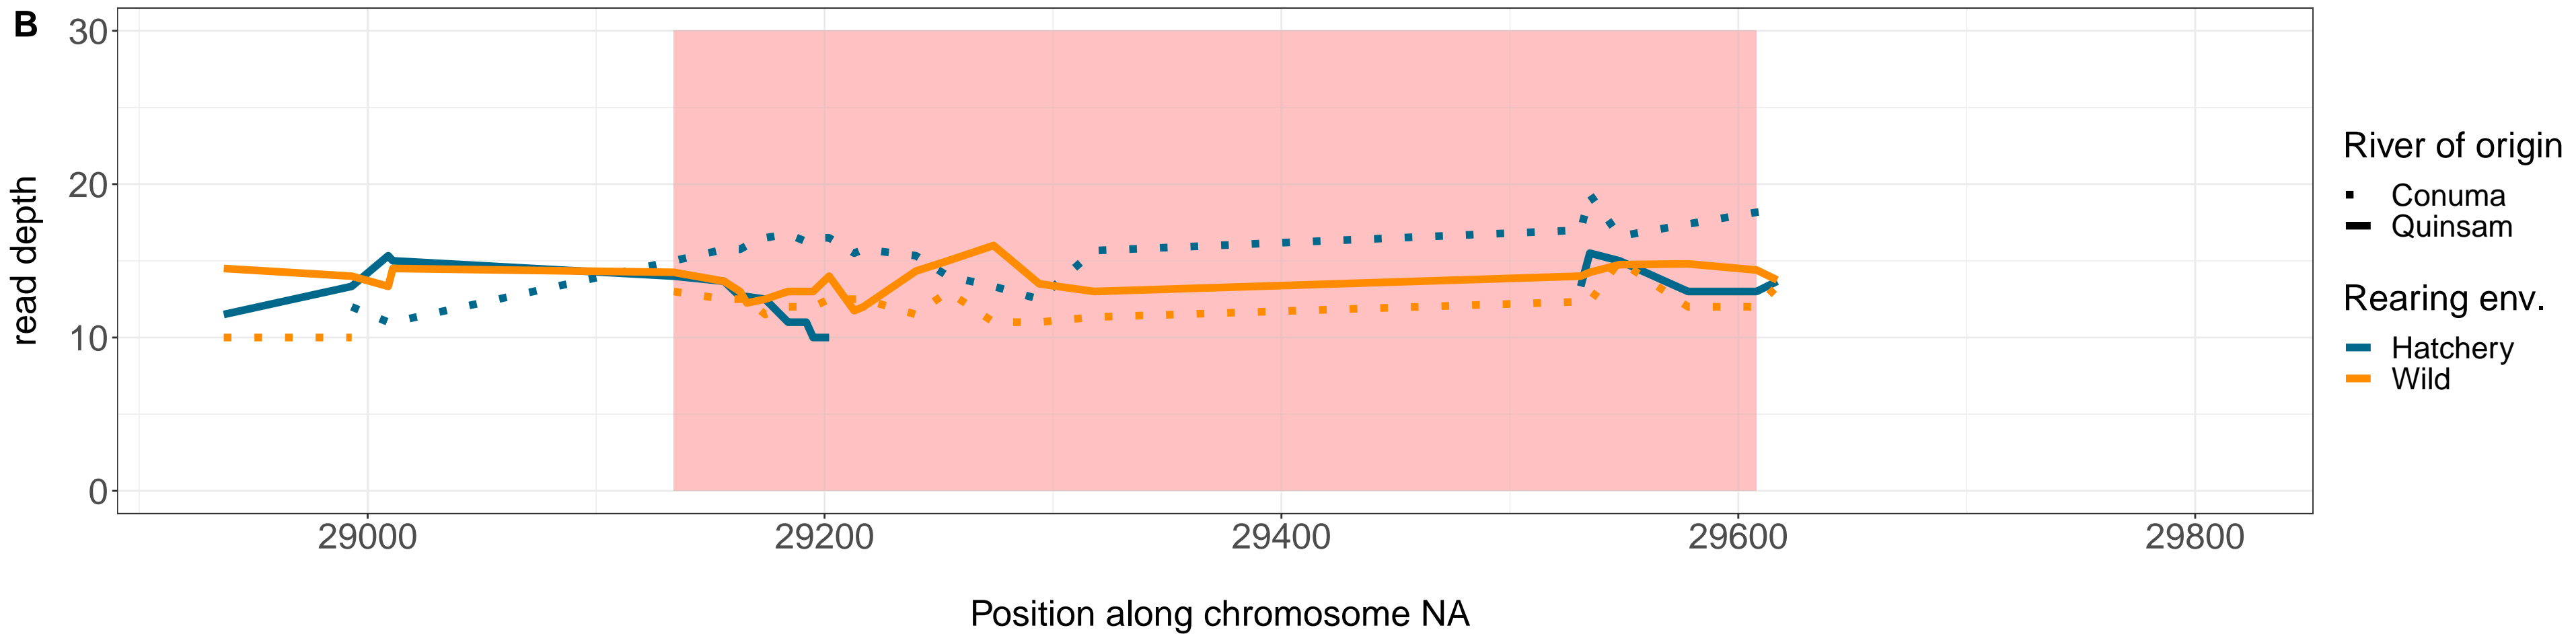

**A**

## DMR\_105

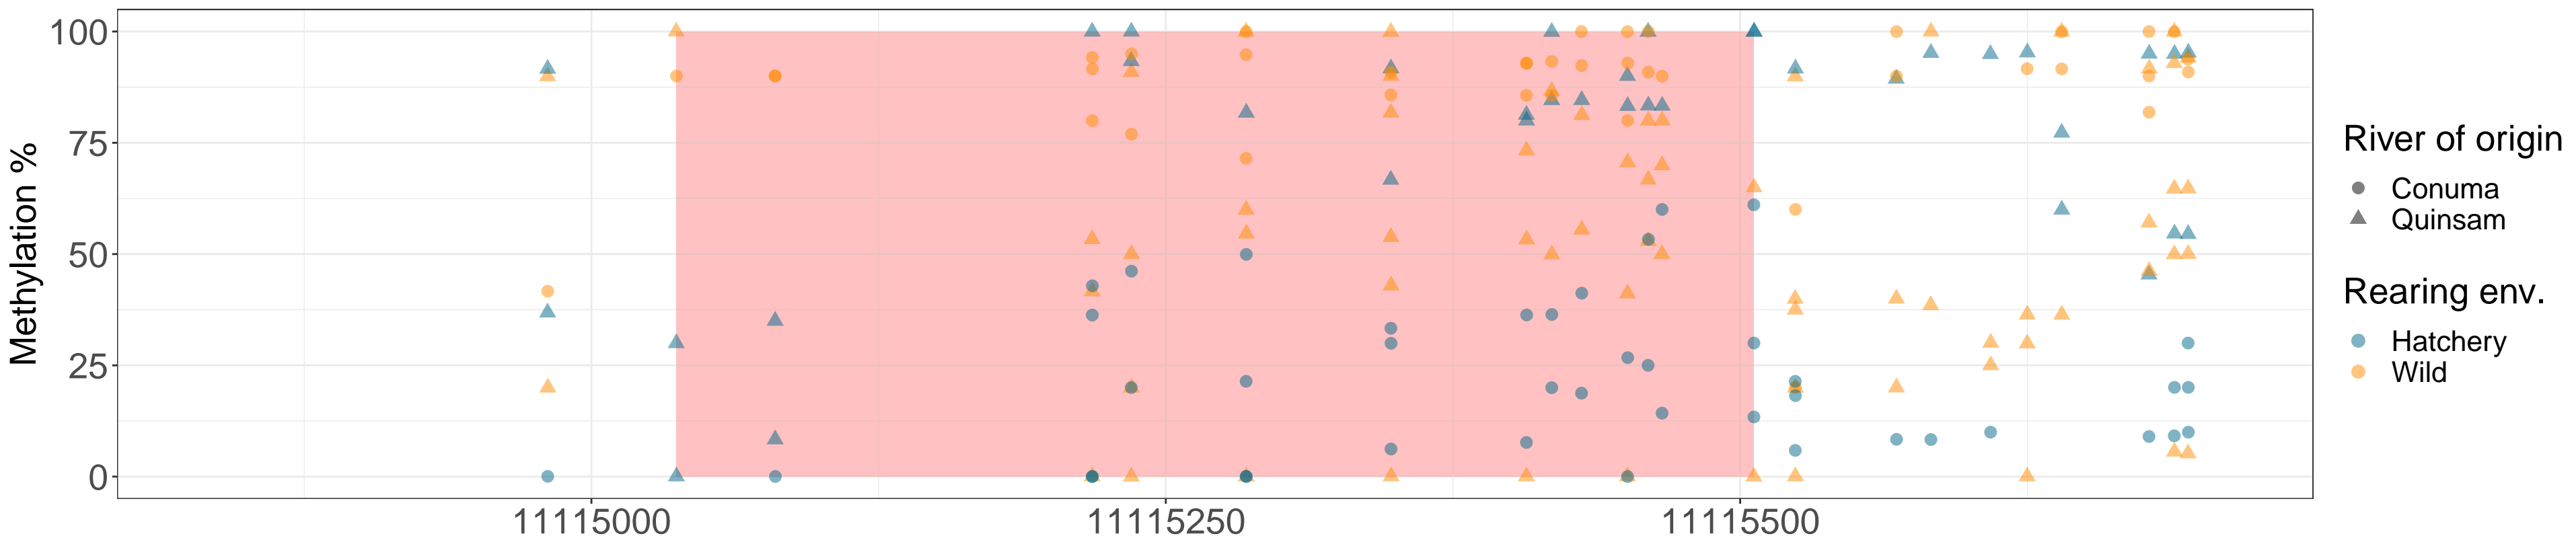**B**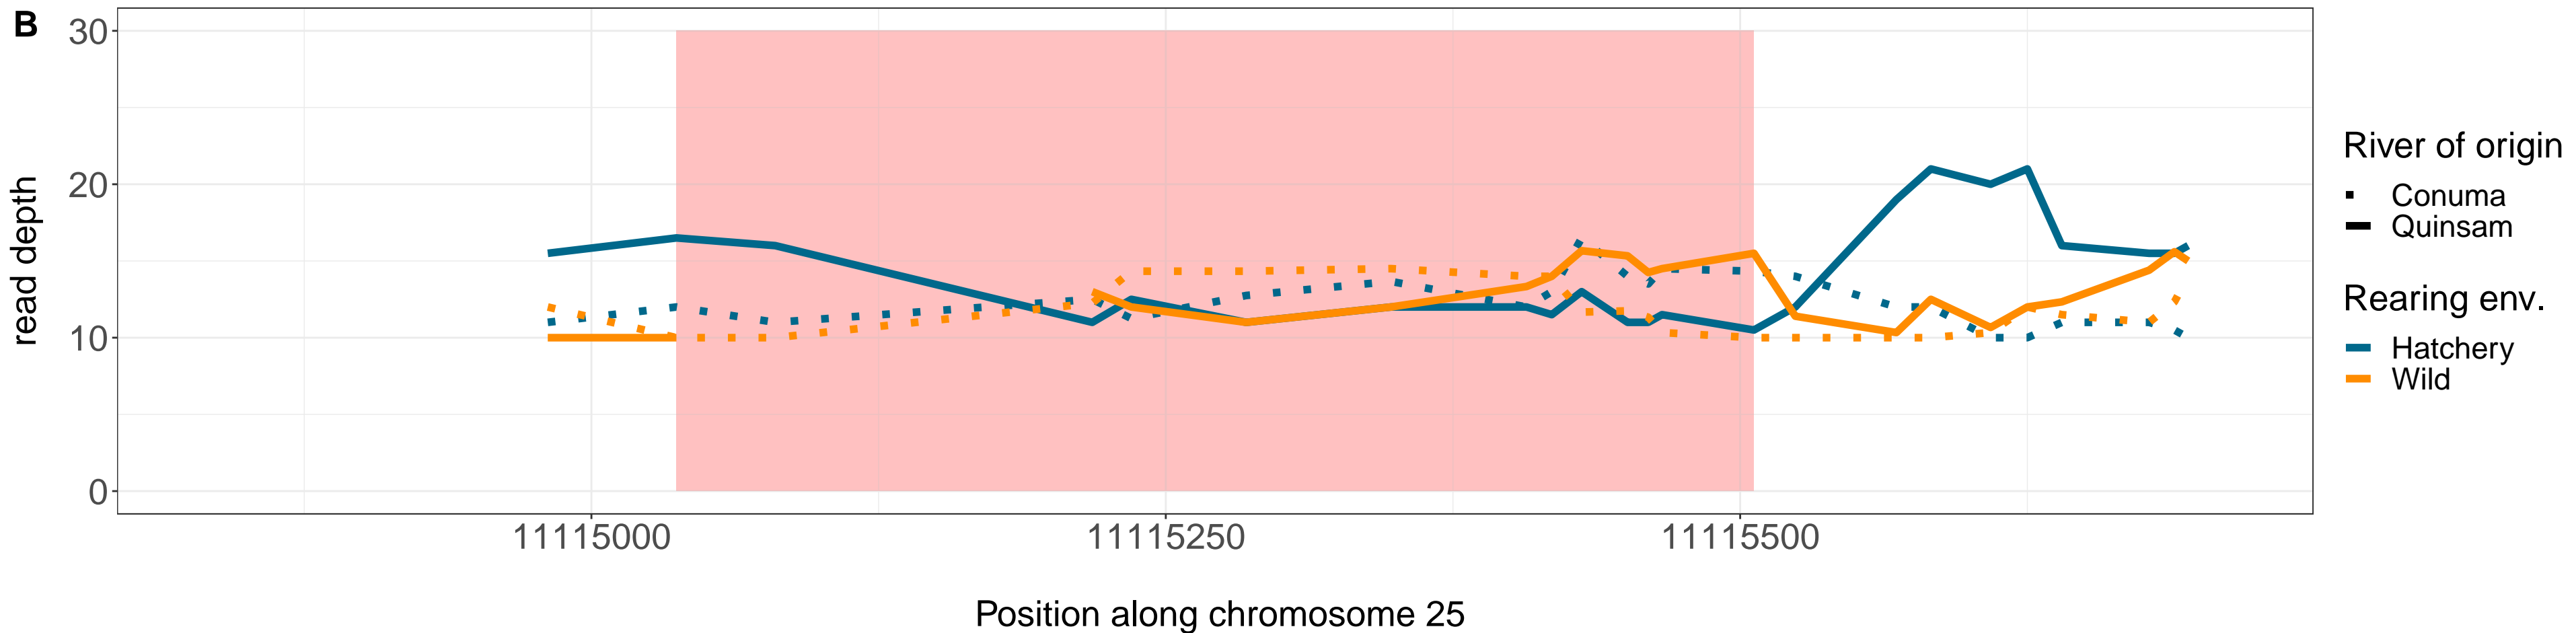

**A**

## DMR\_106

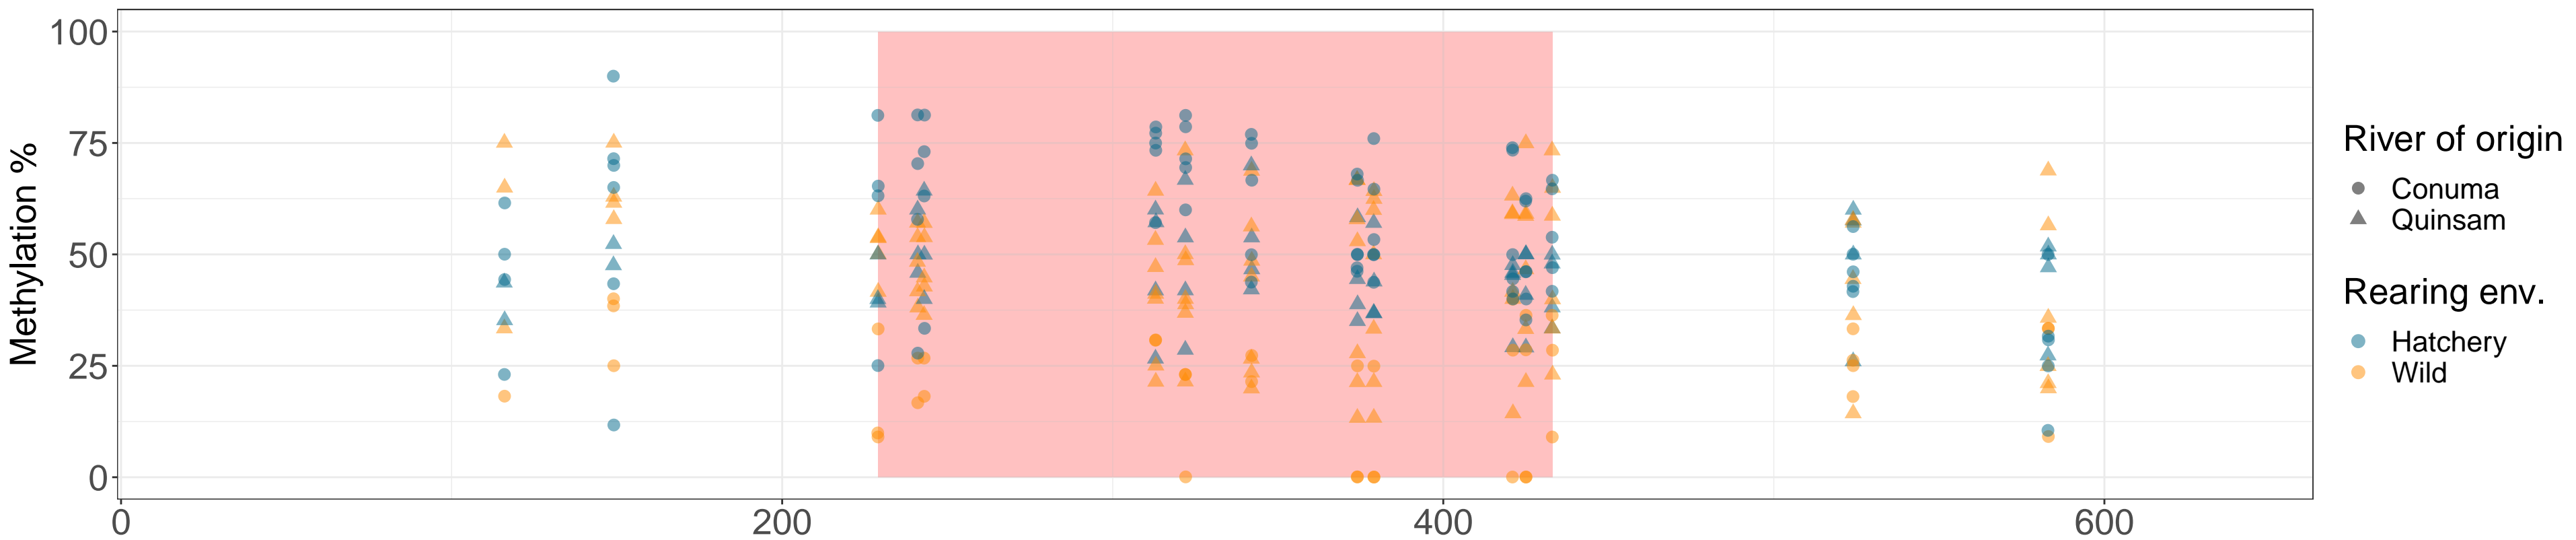**B**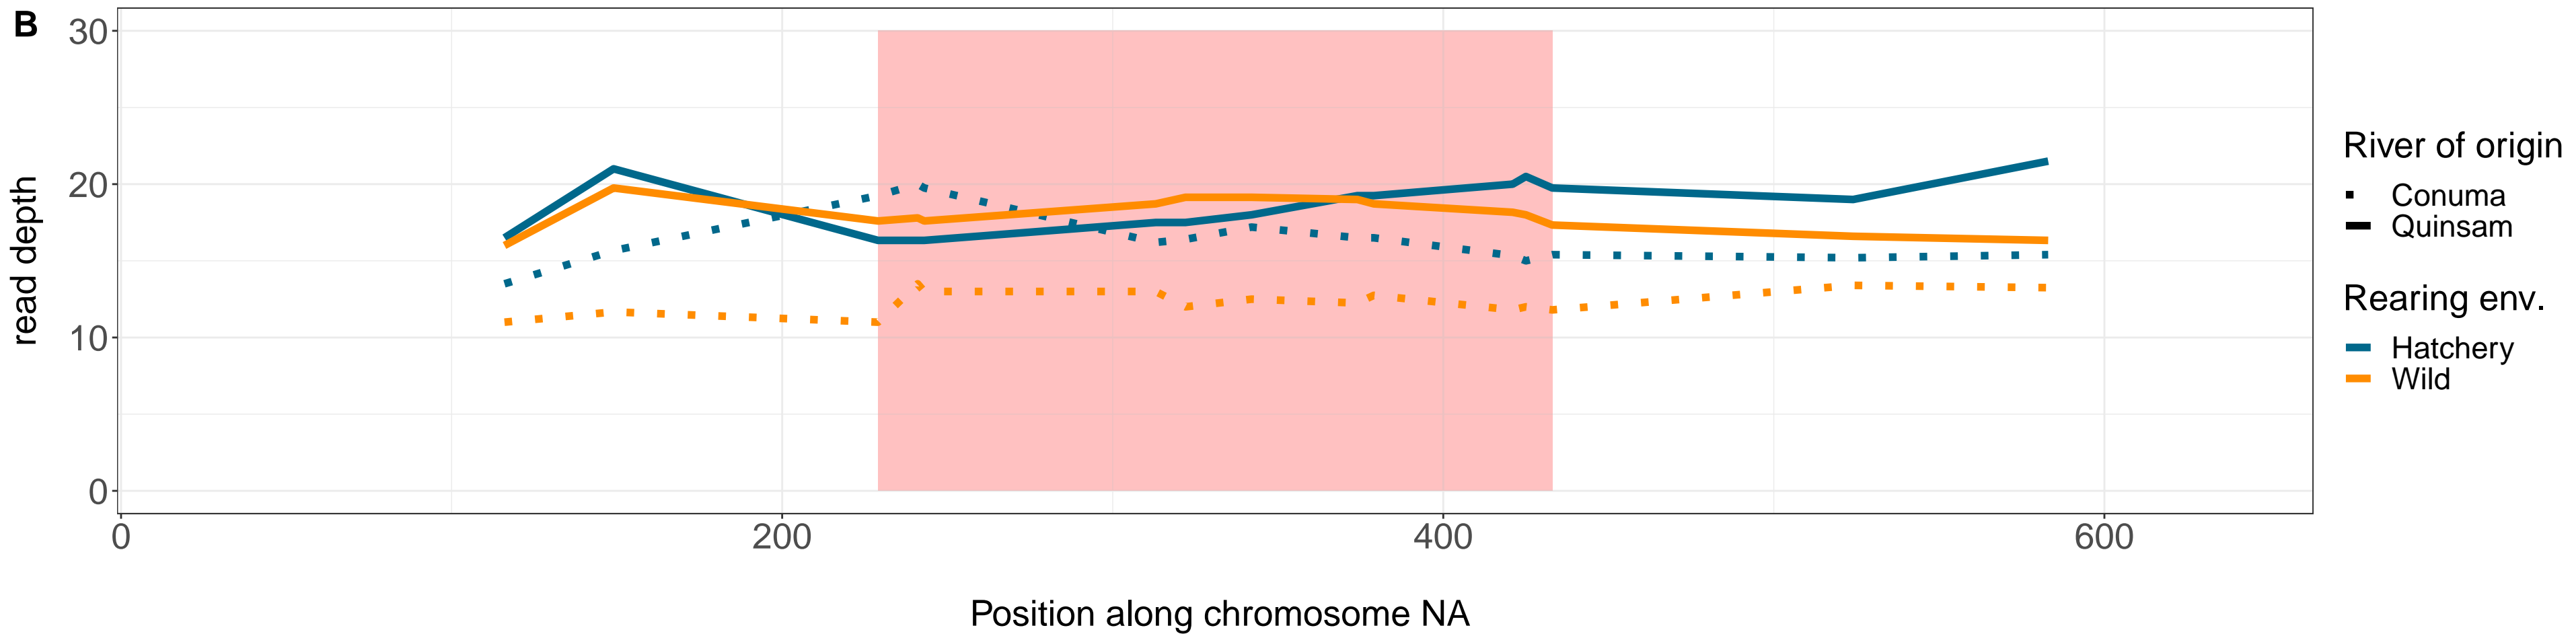

**A**

## DMR\_107

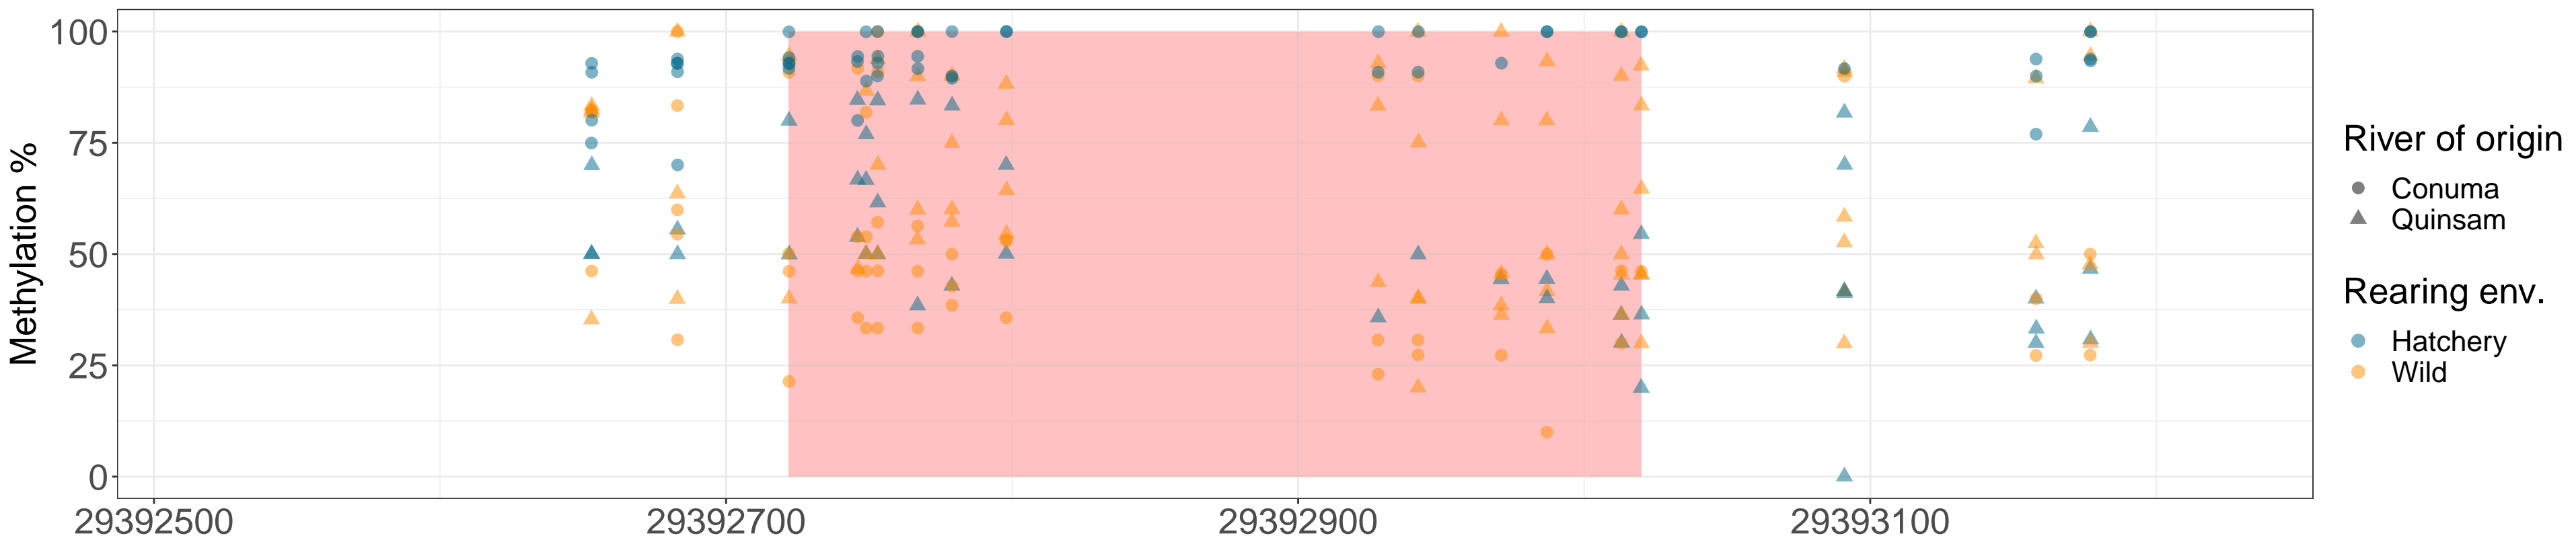**B**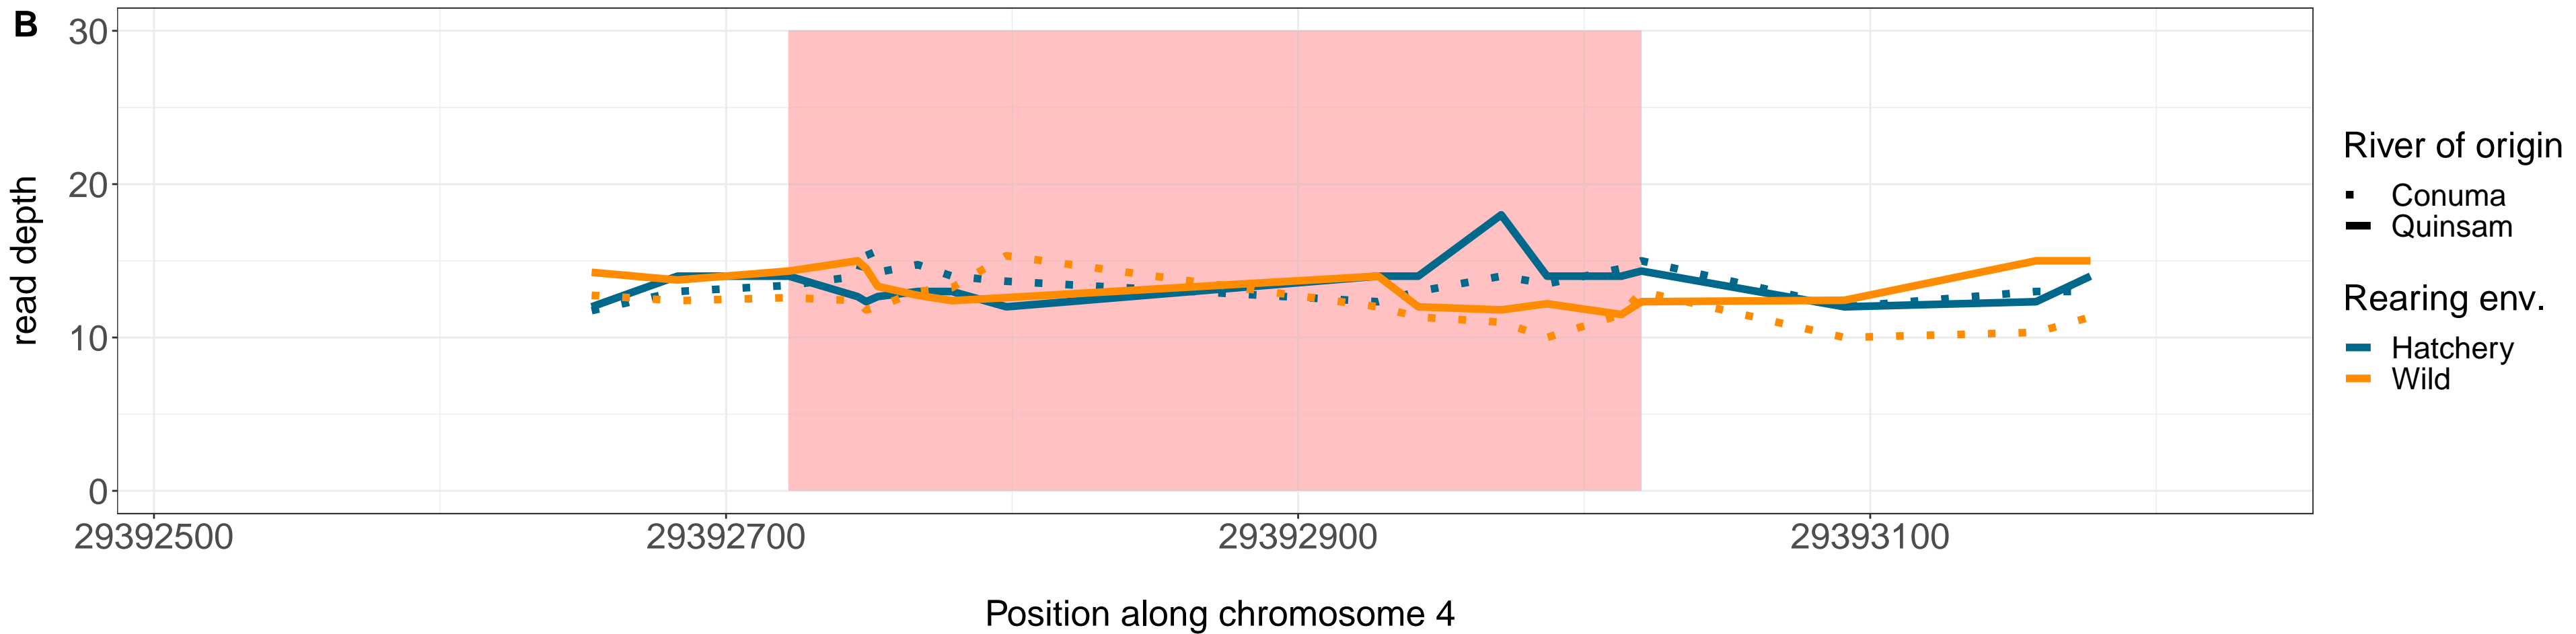

**A**

## DMR\_109

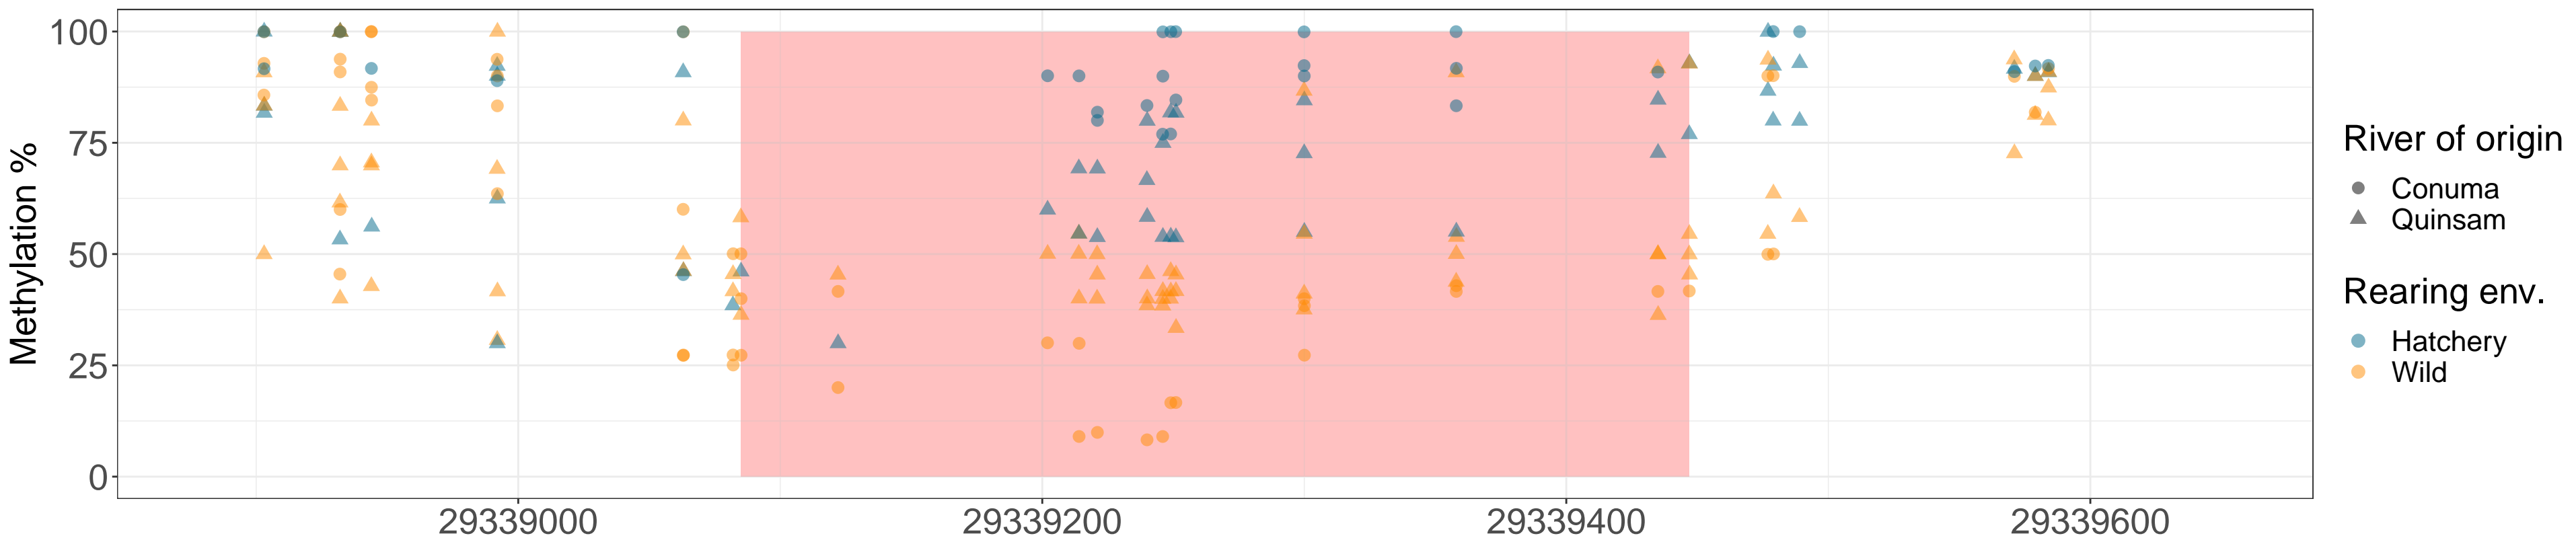**B**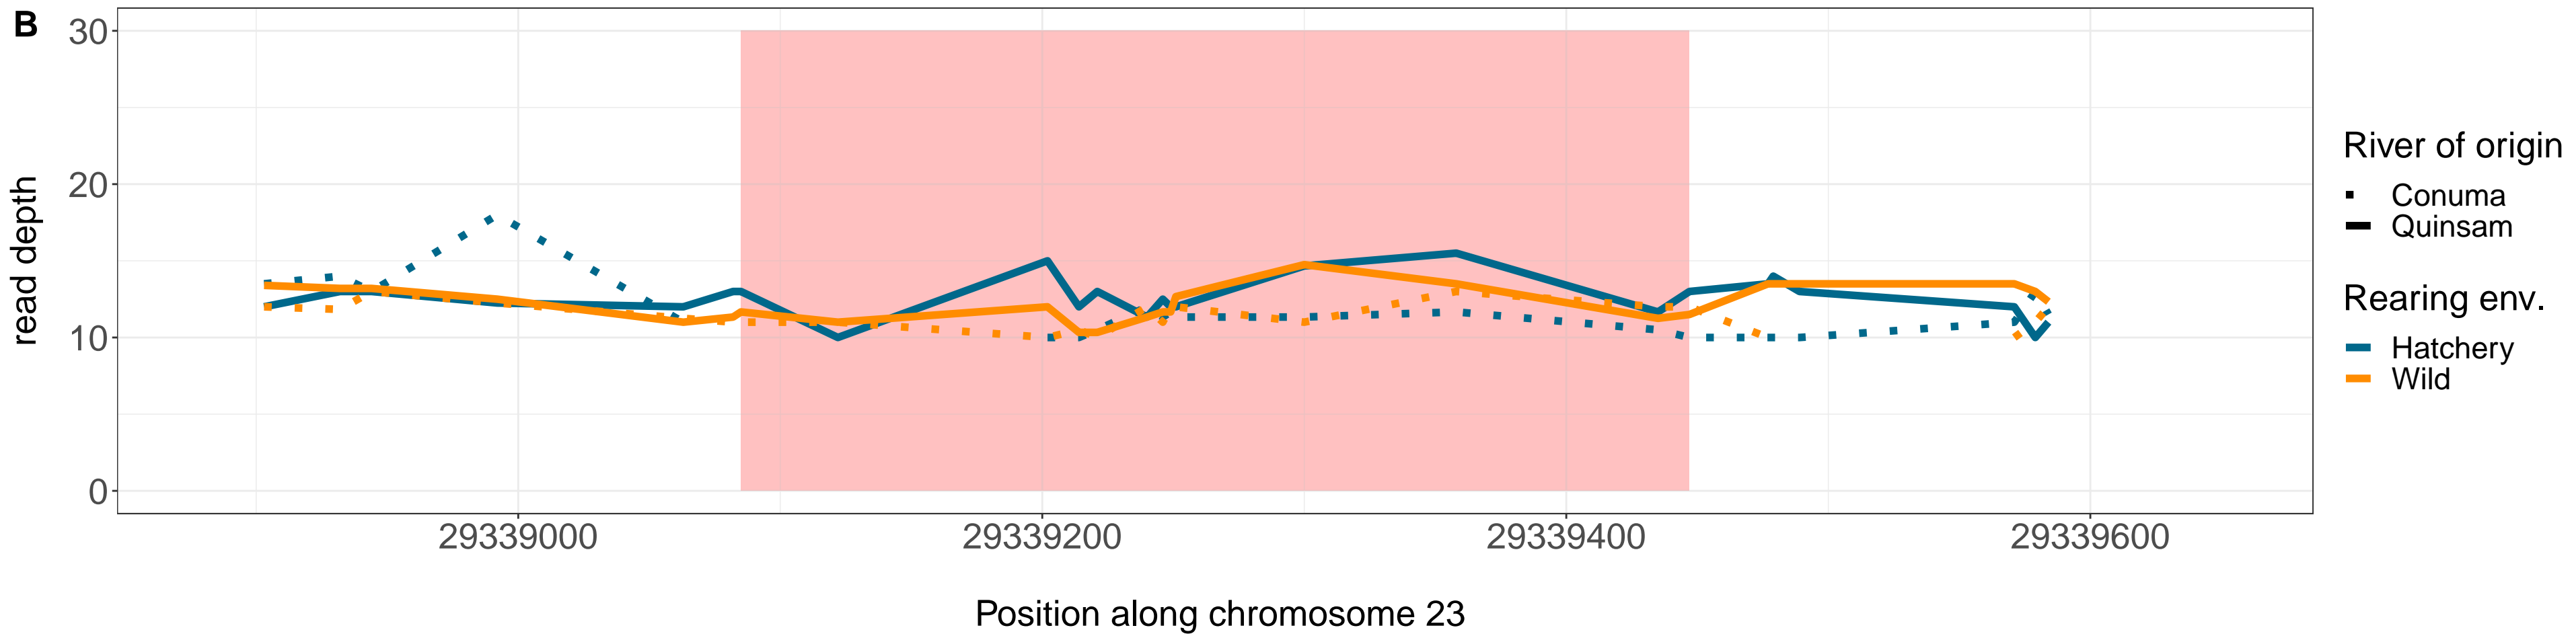



# DMR\_110

XM\_020497732.1

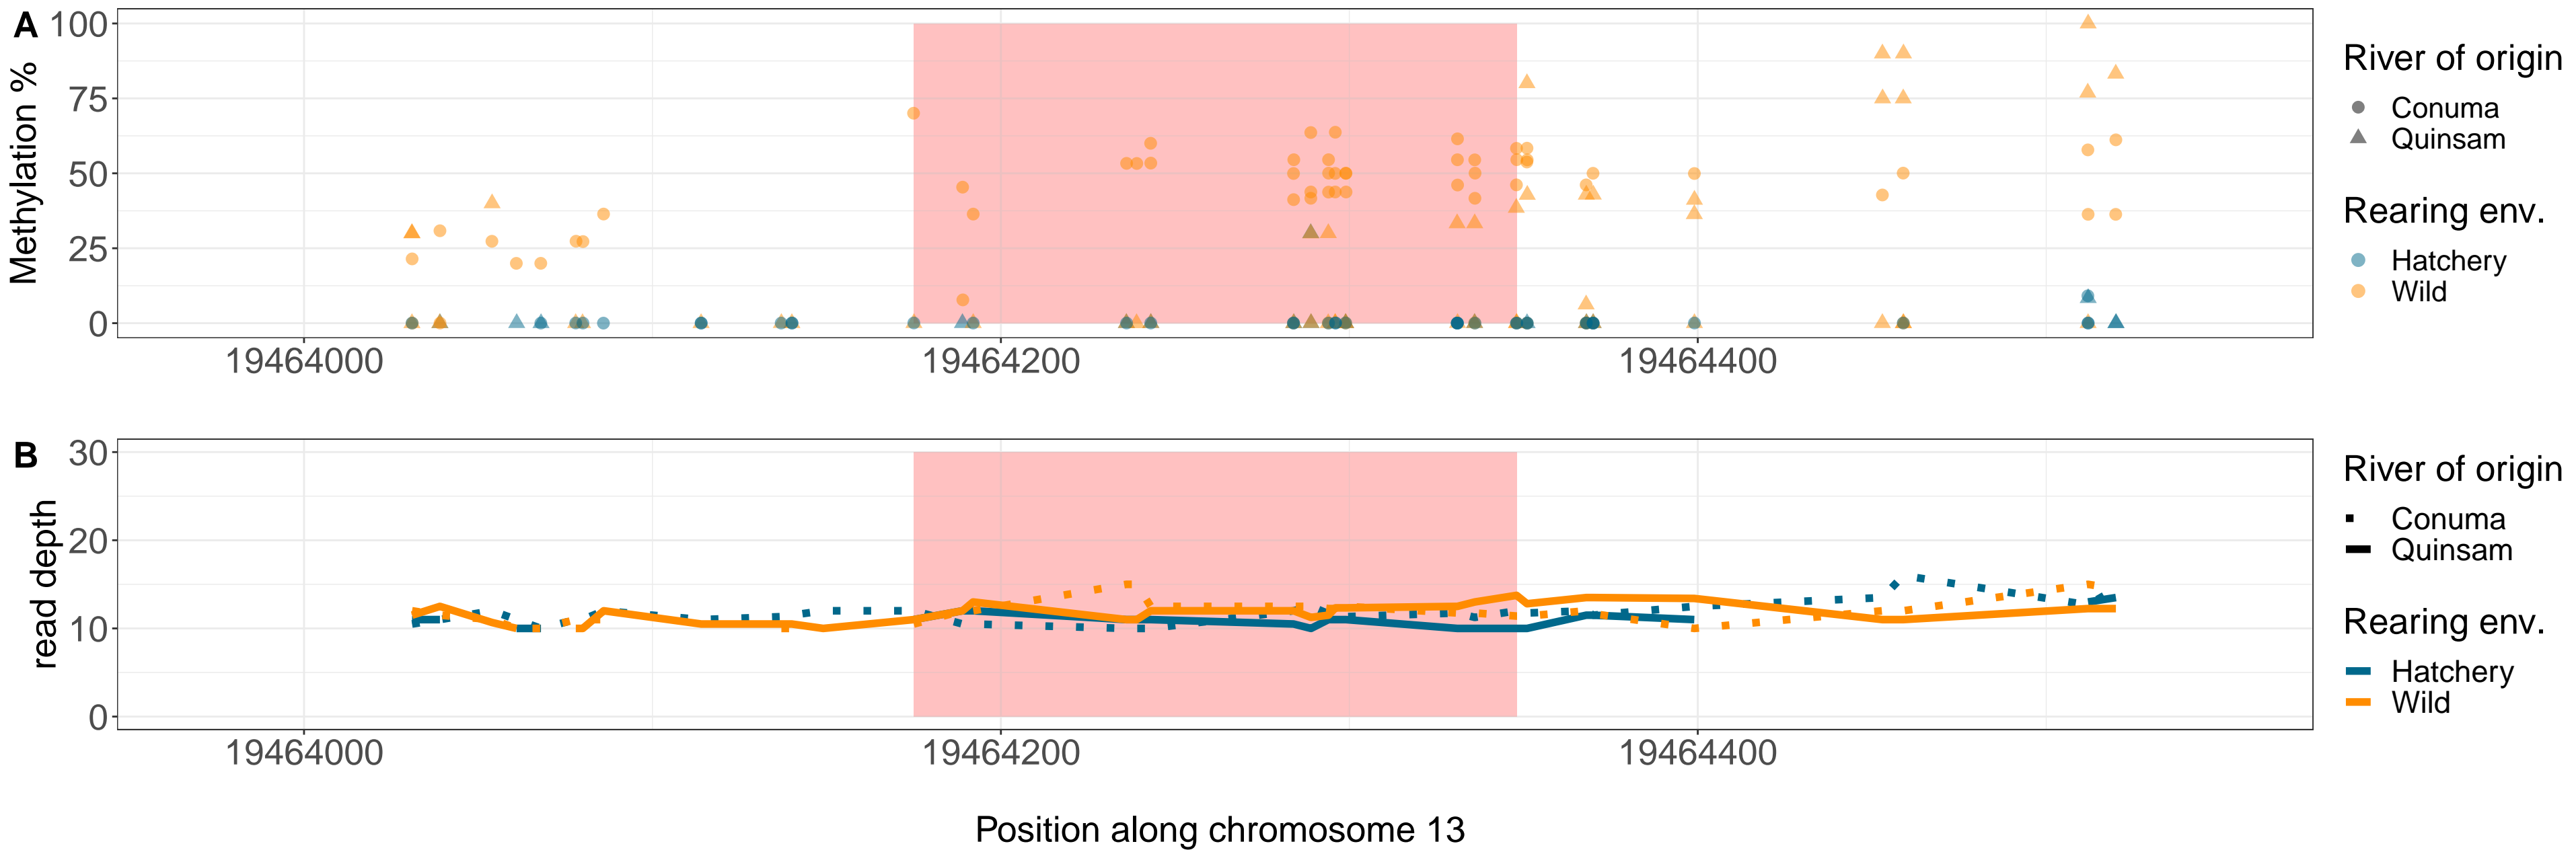

# DMR\_111

**A**
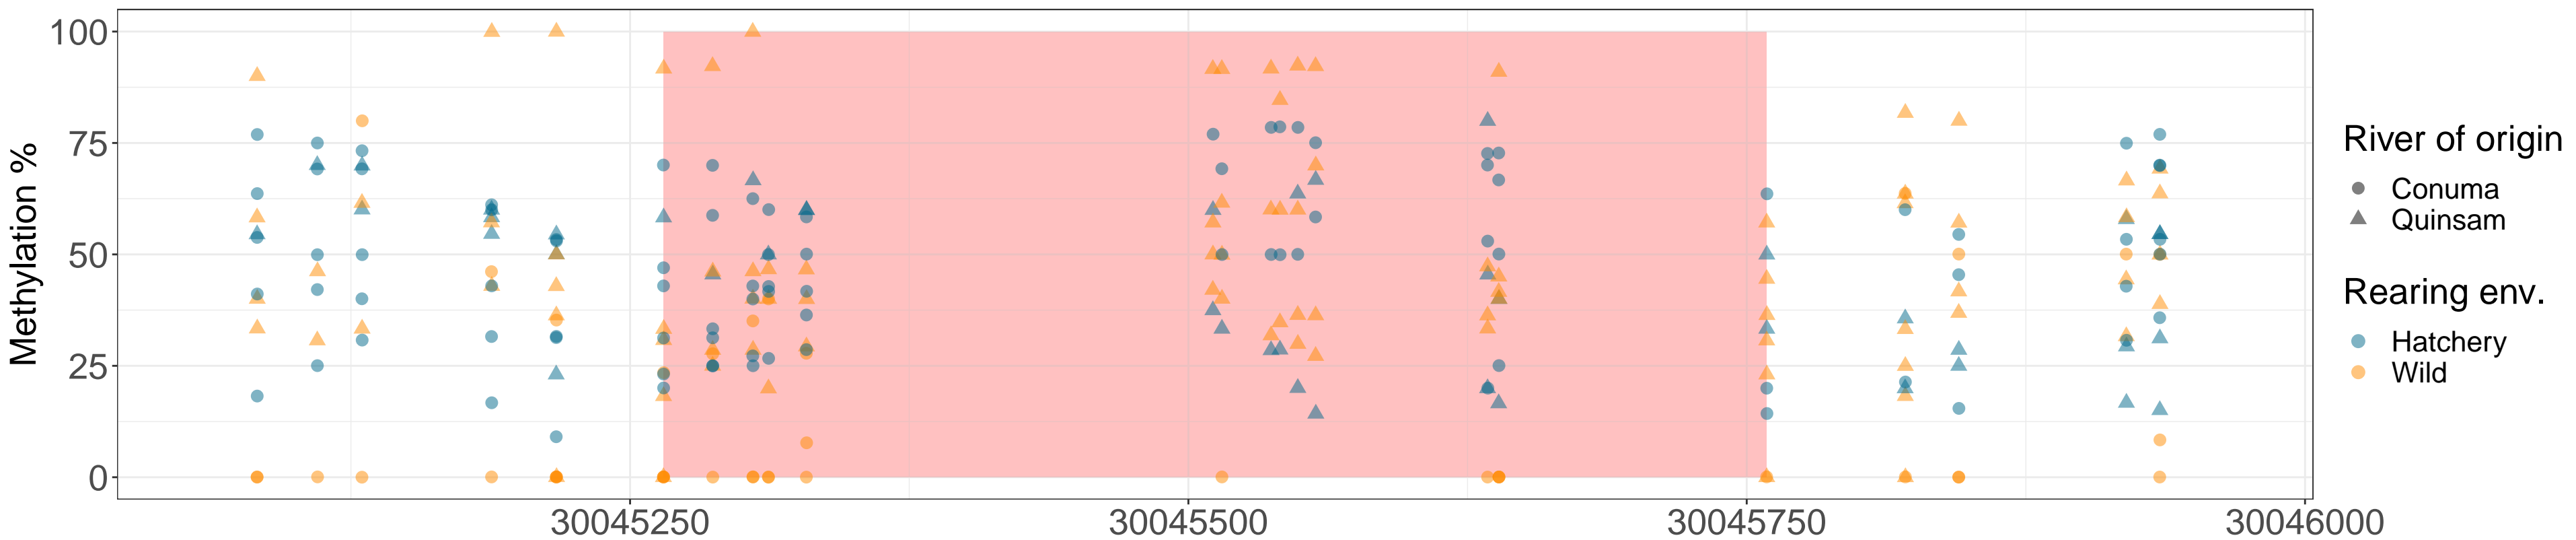
**B**
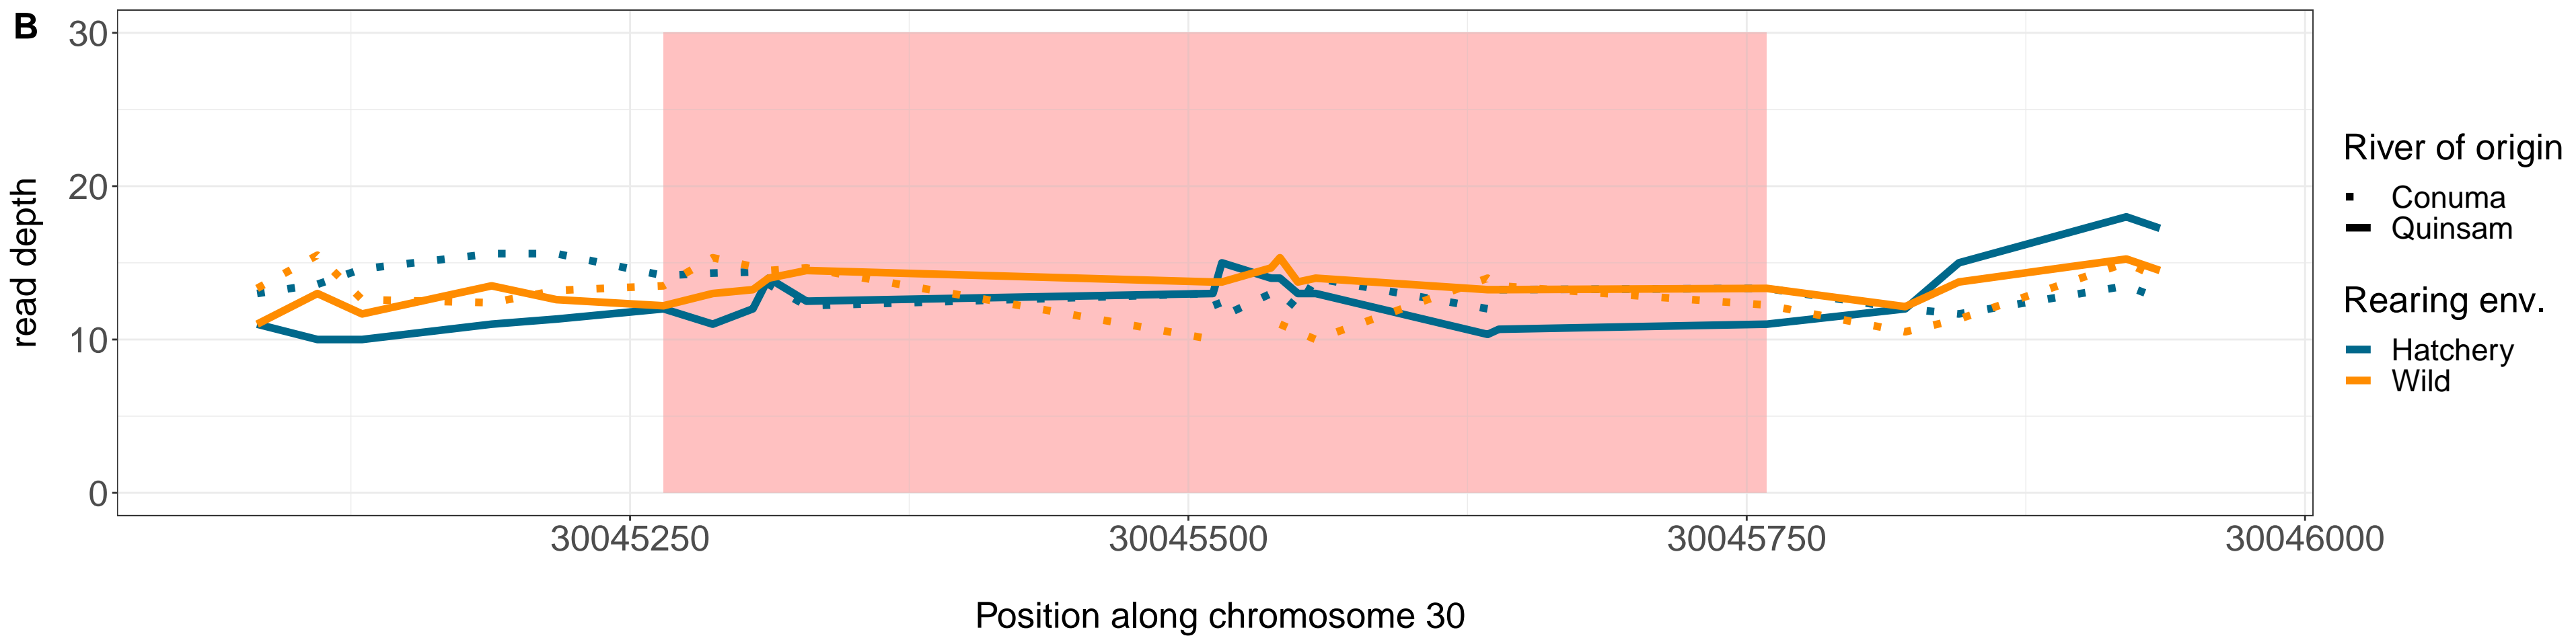

**A**

## DMR\_112

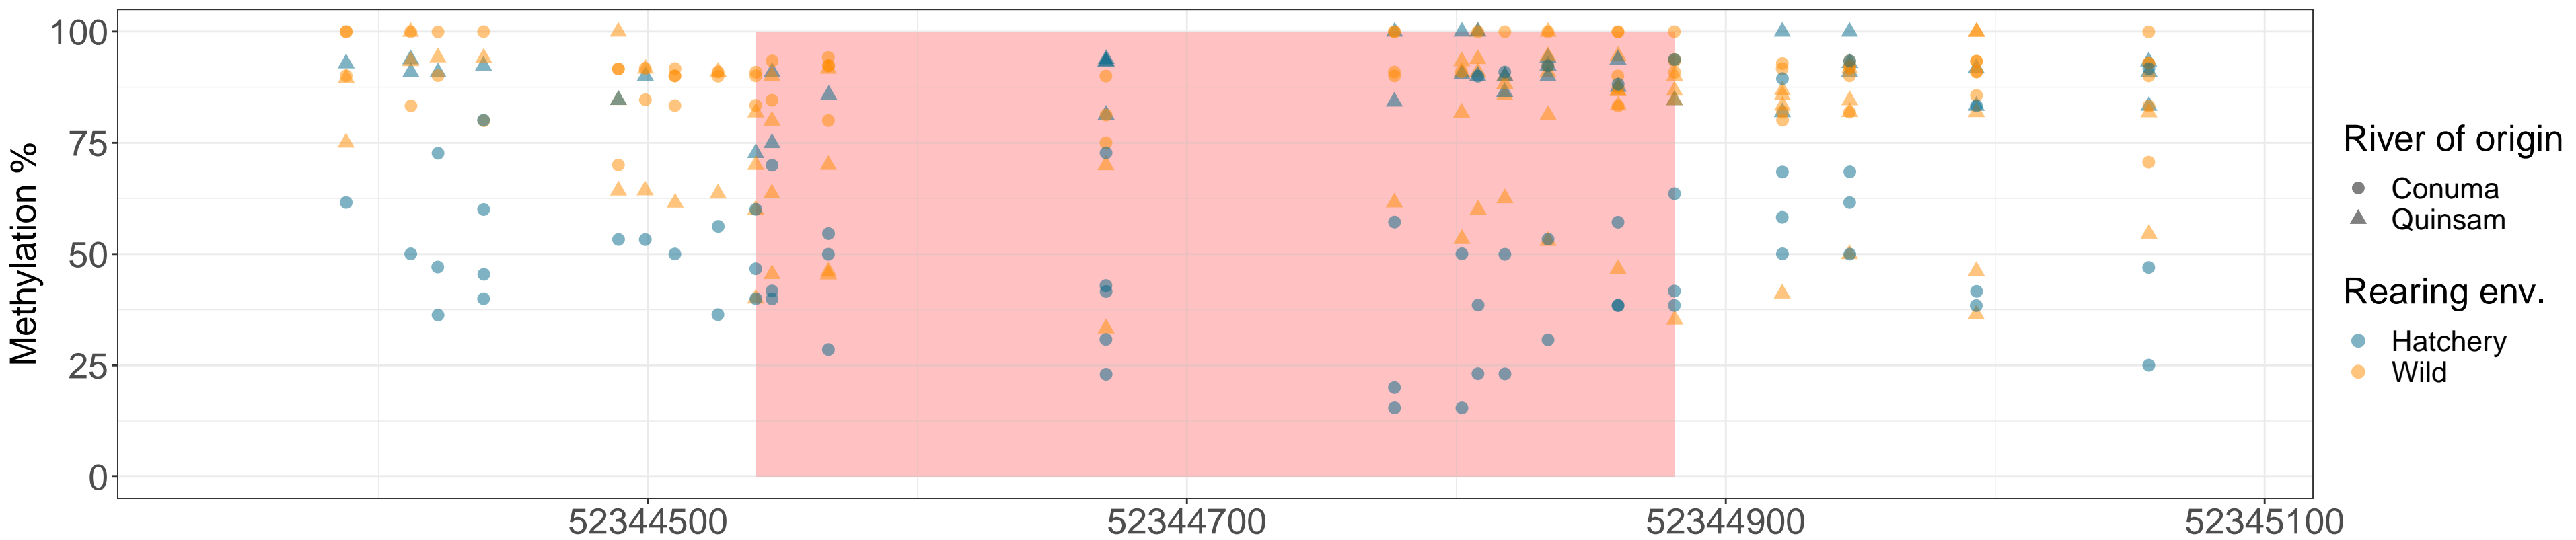**B**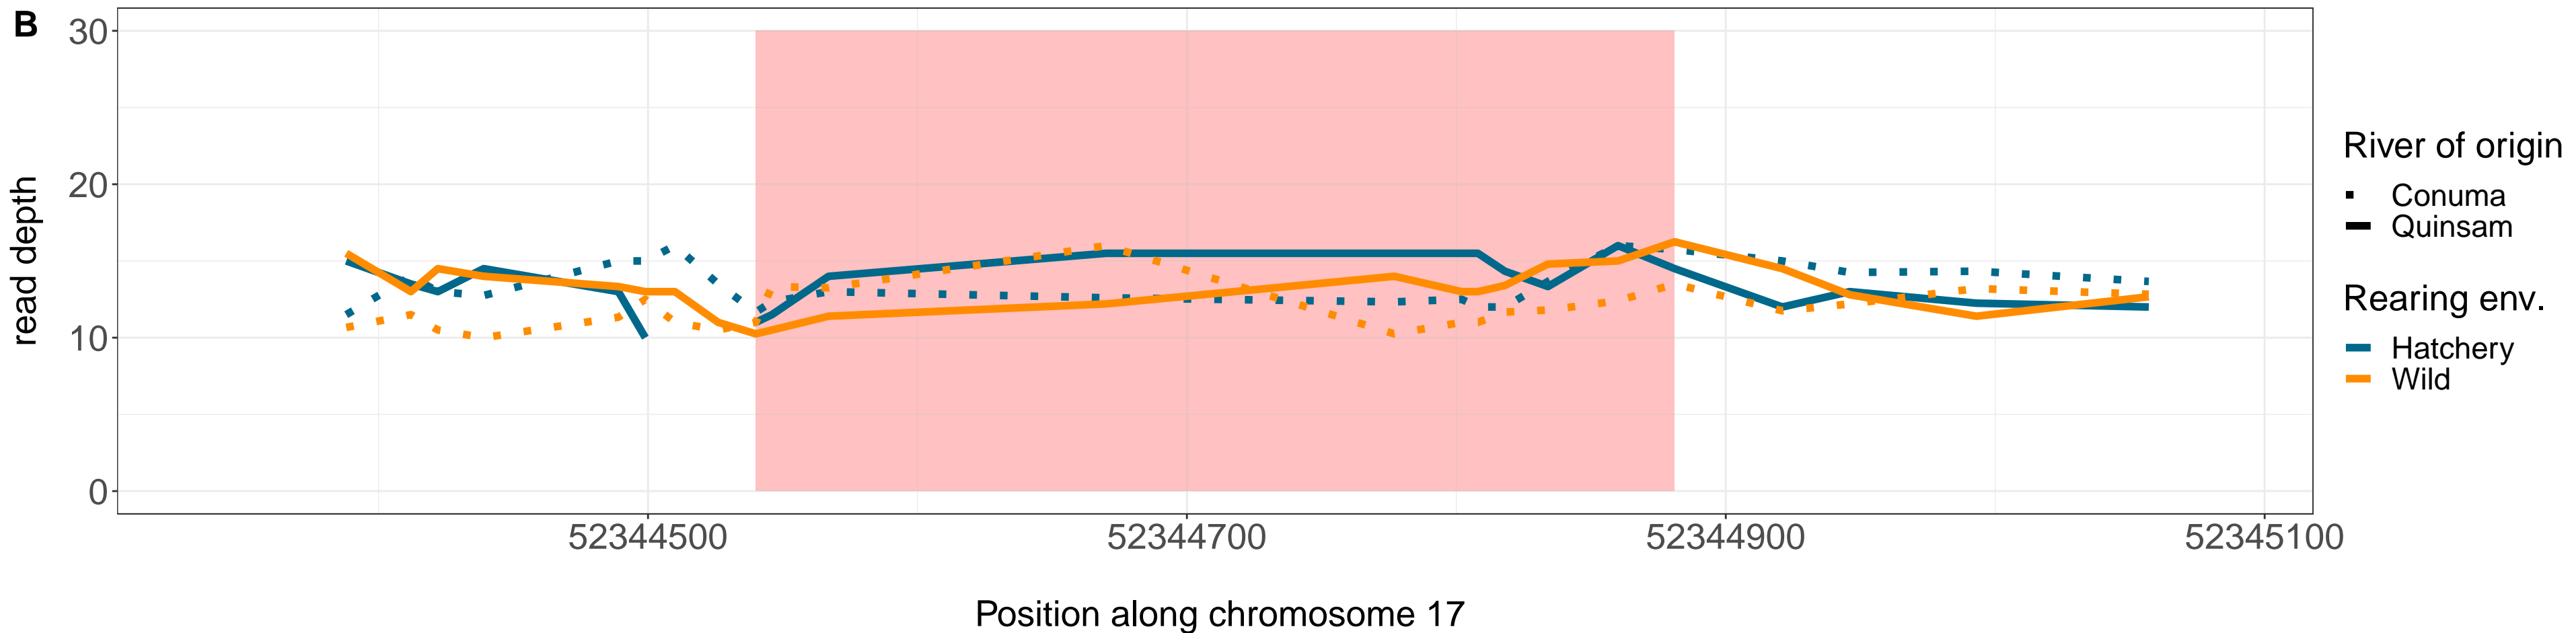

**A**

## DMR\_113

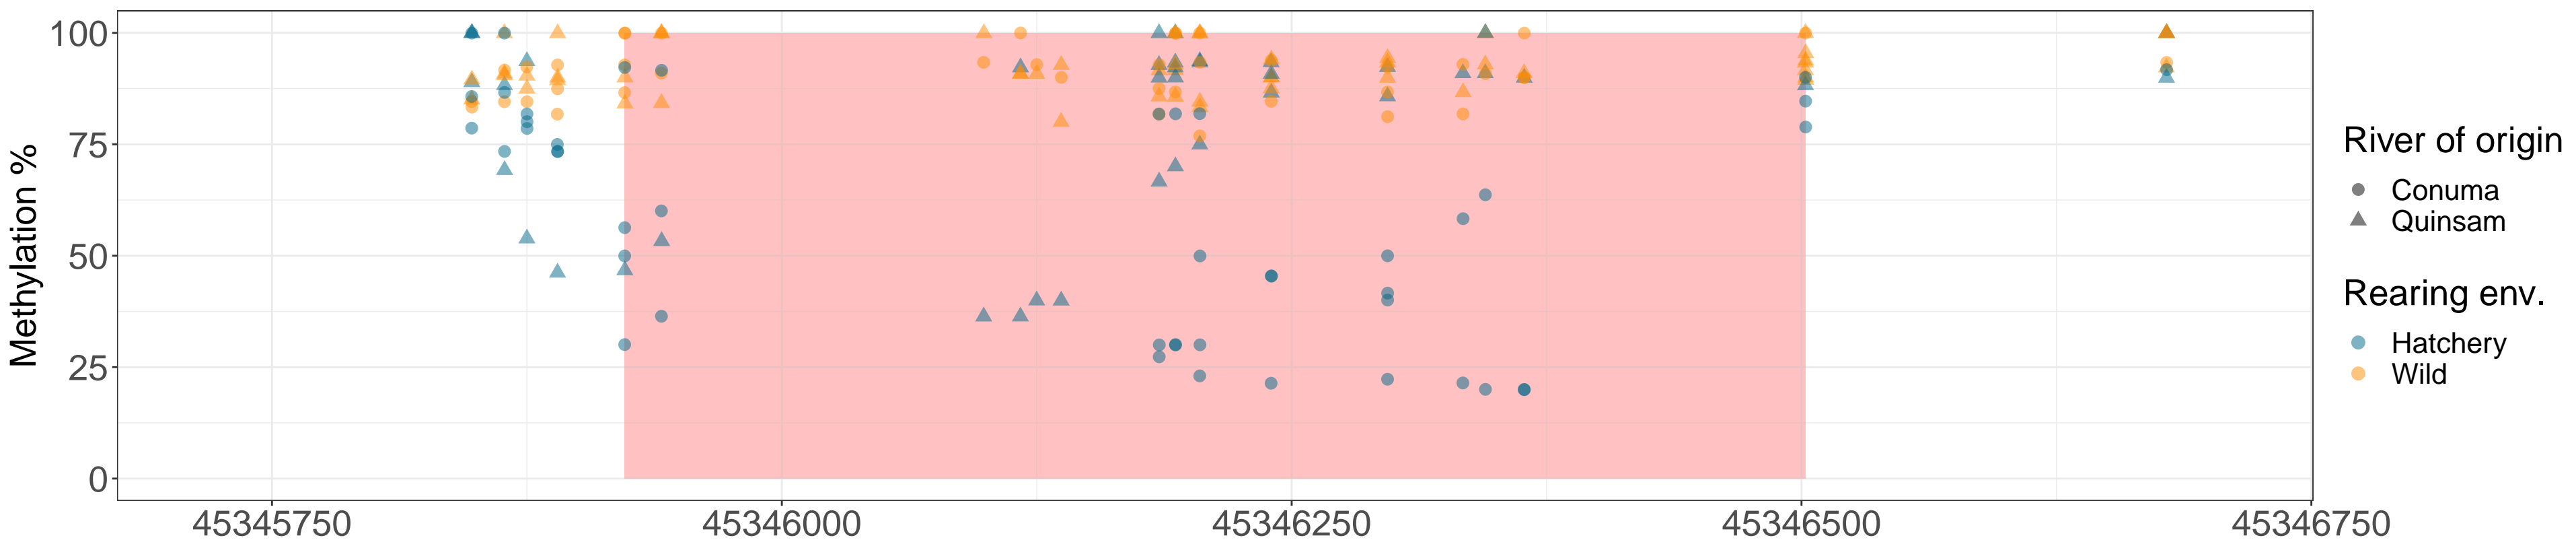**B**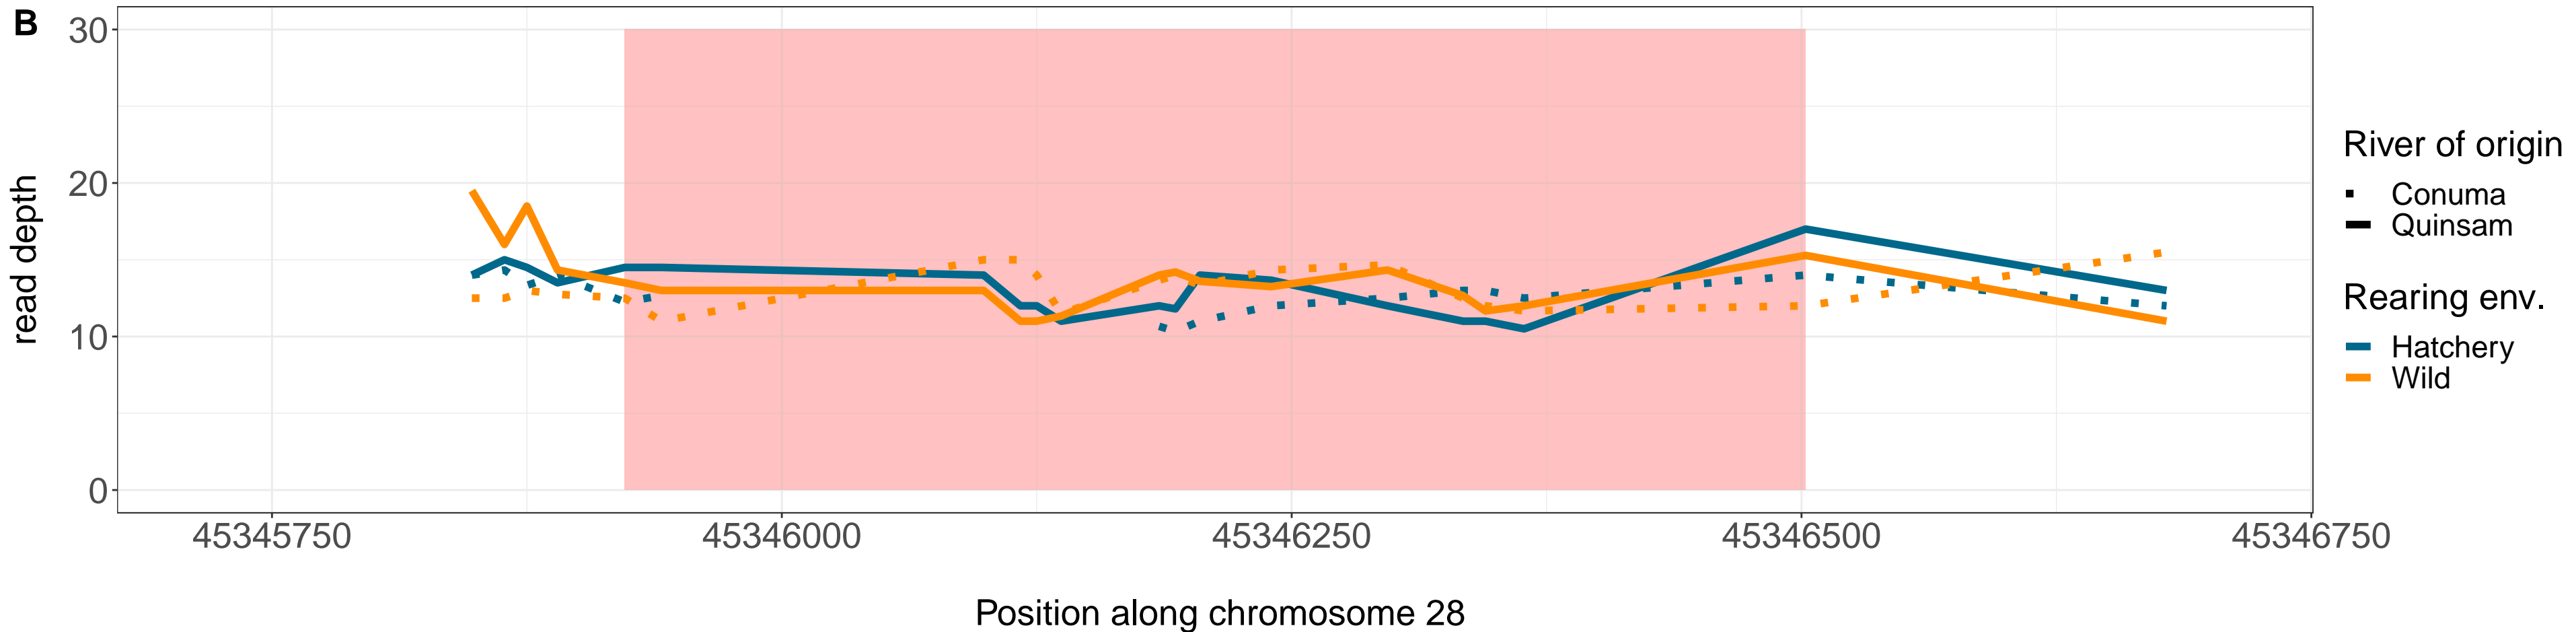

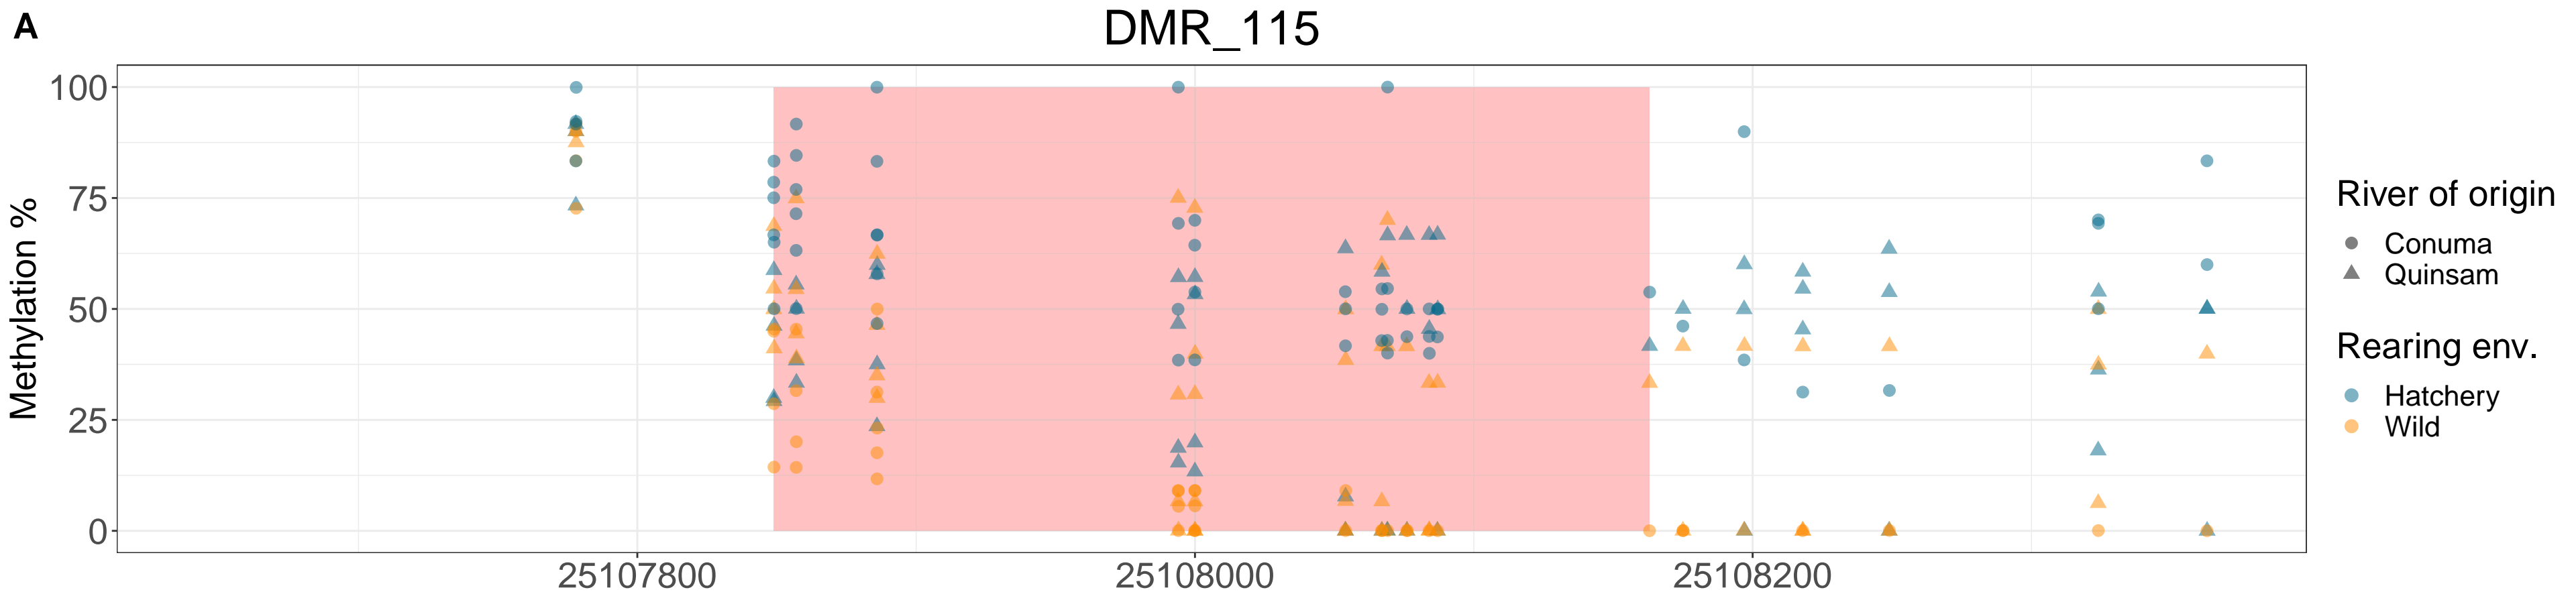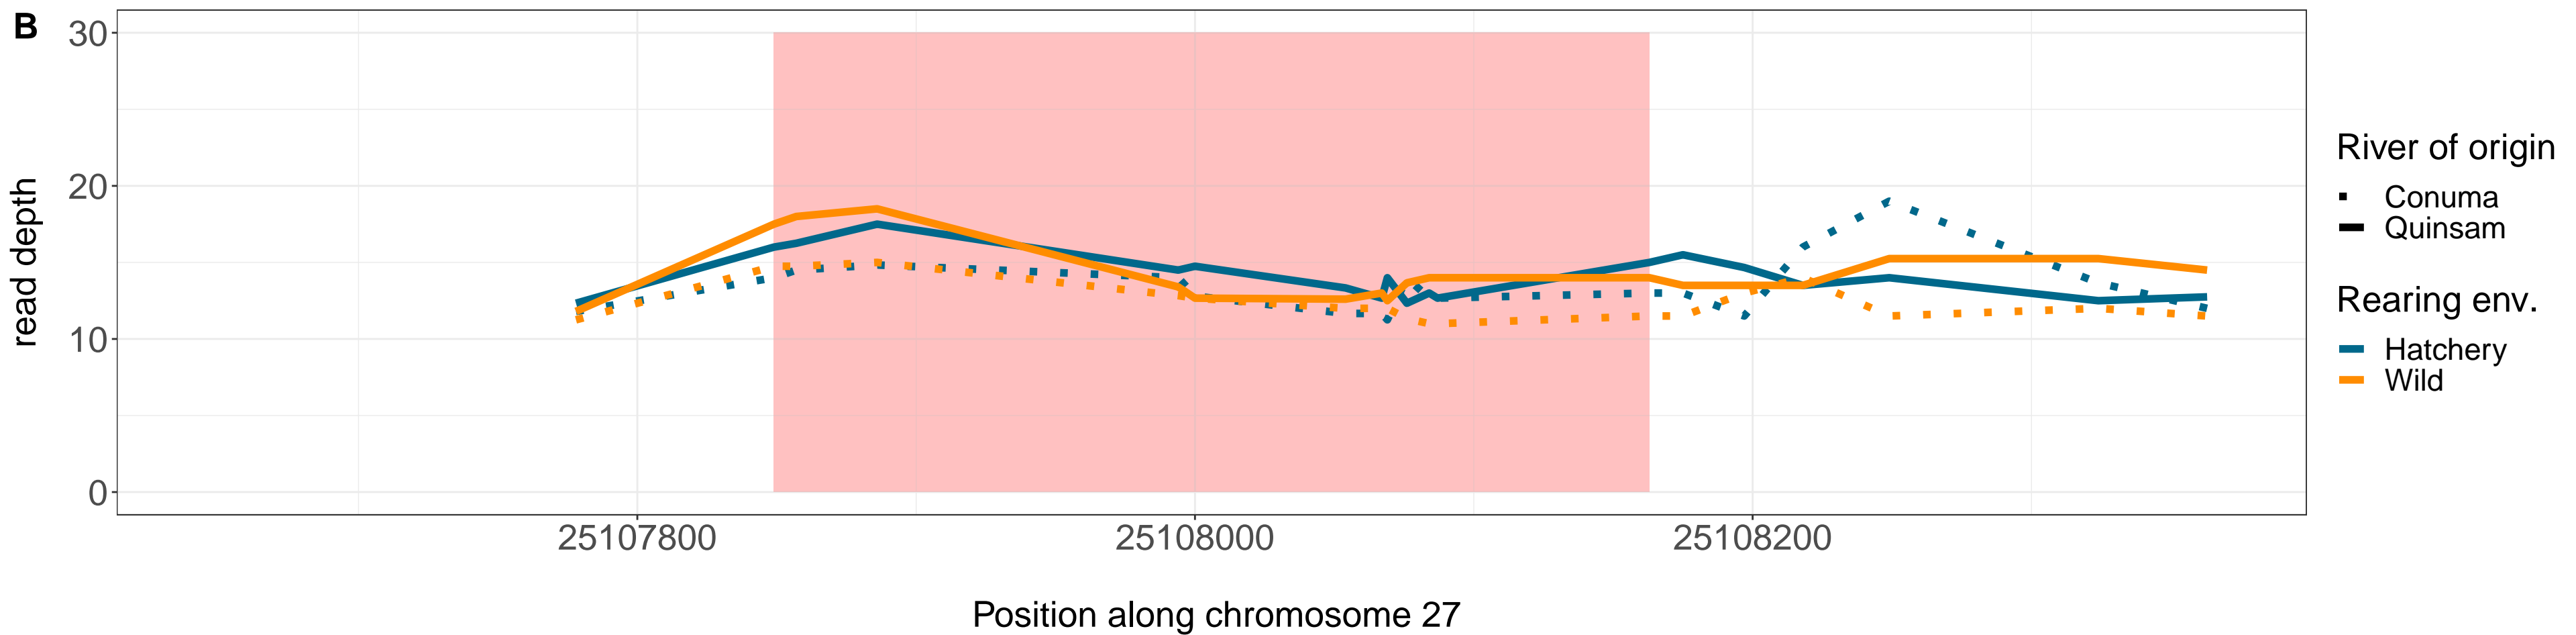

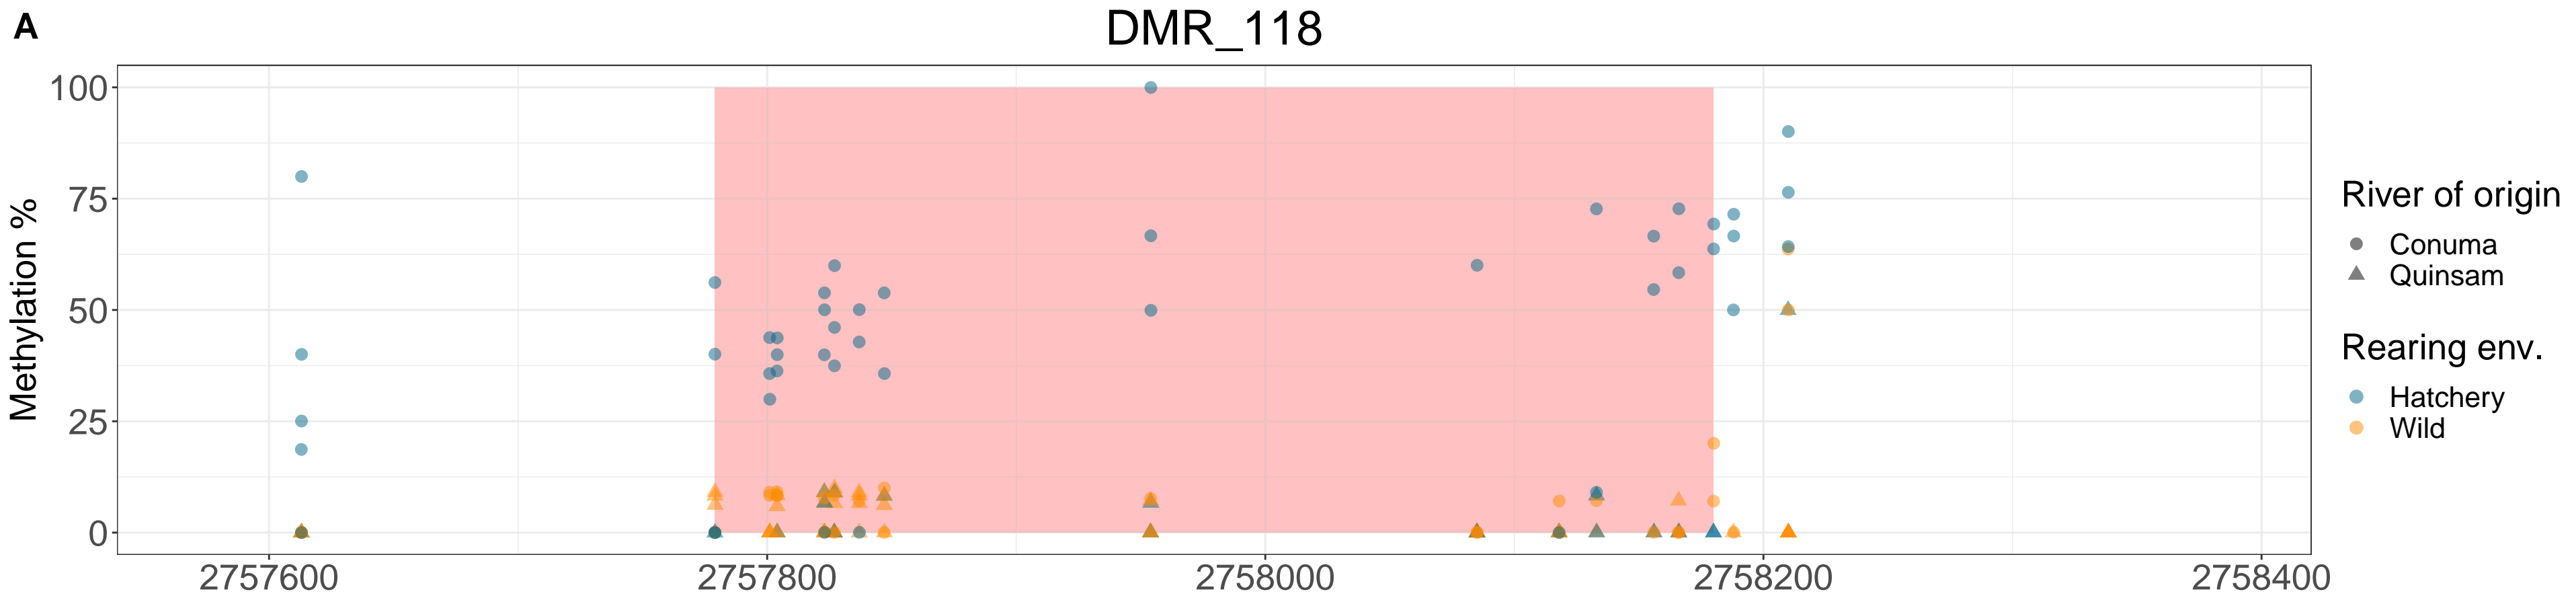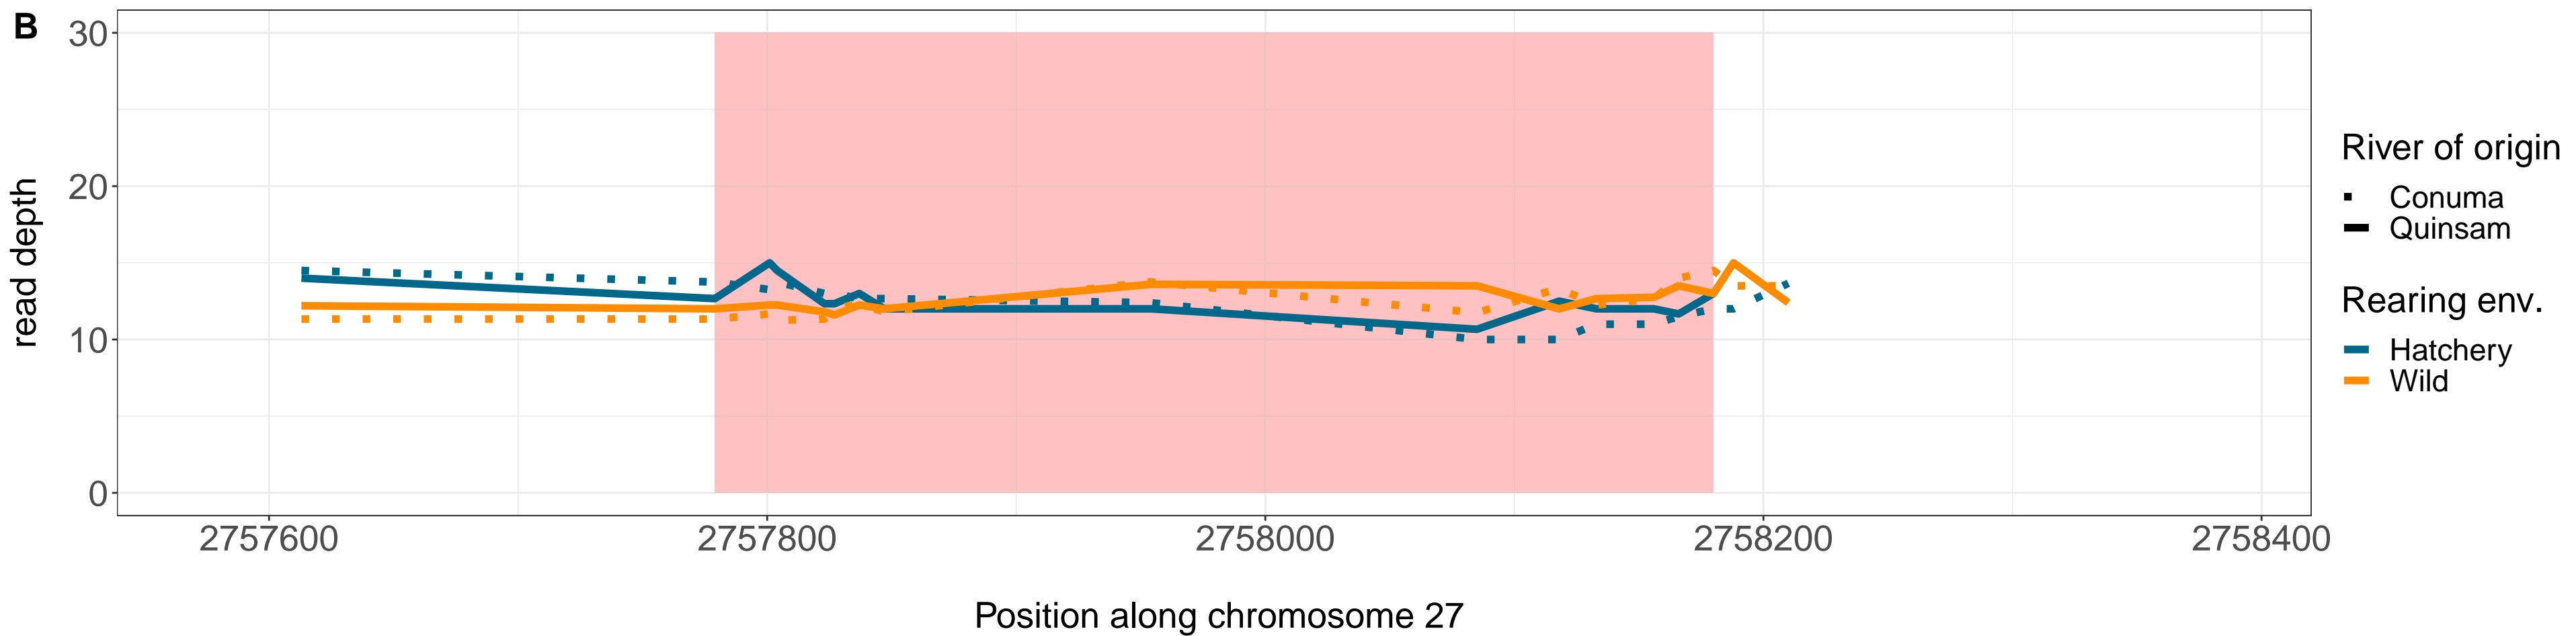

**A**

## DMR\_119

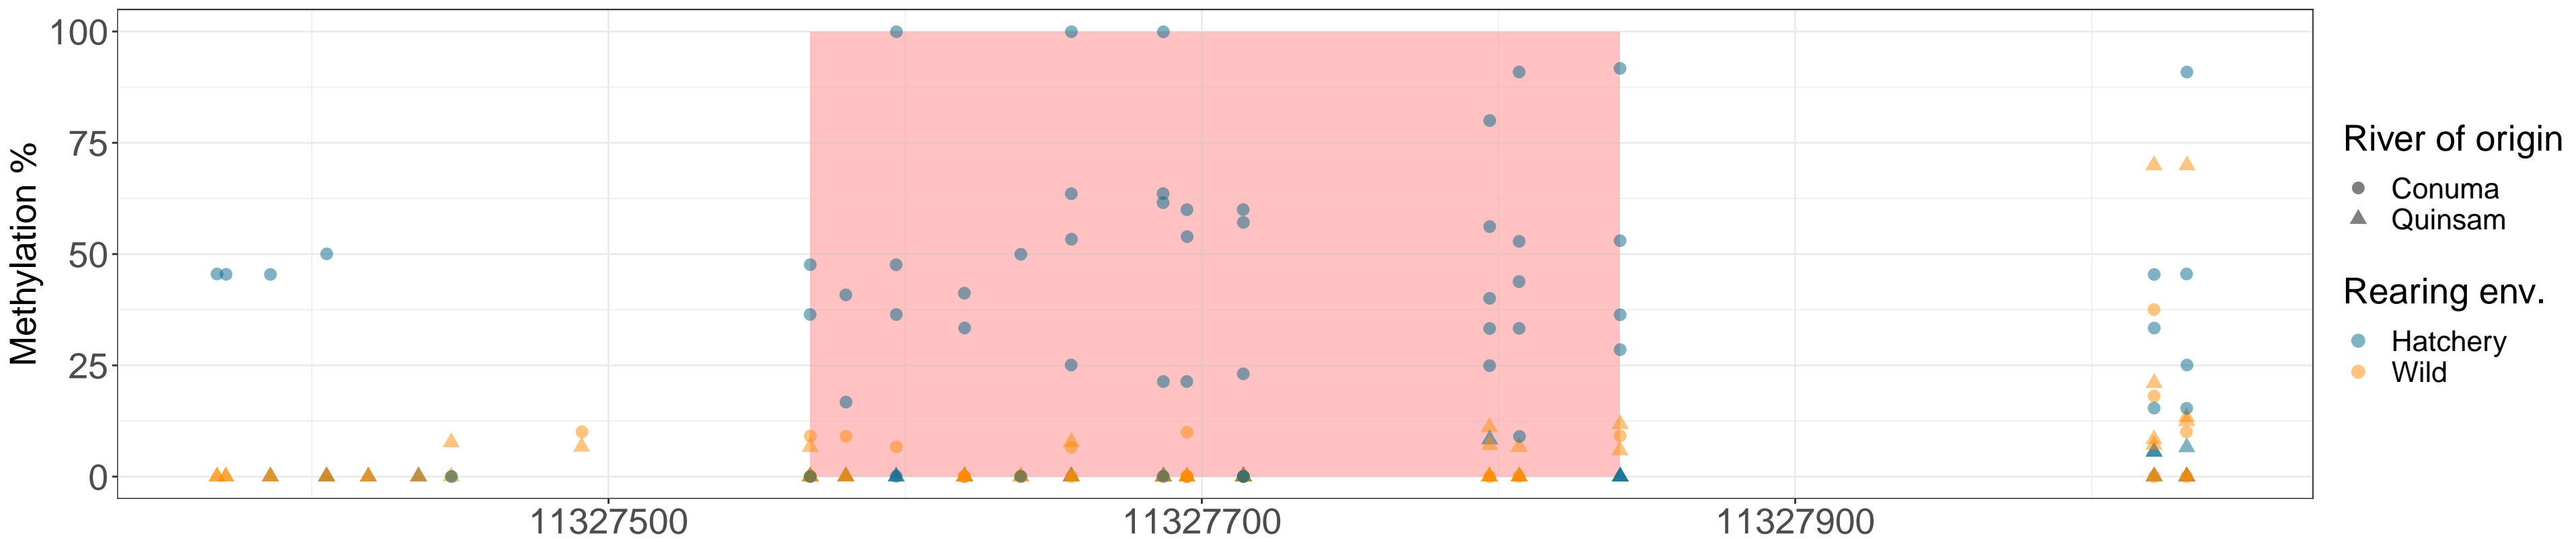**B**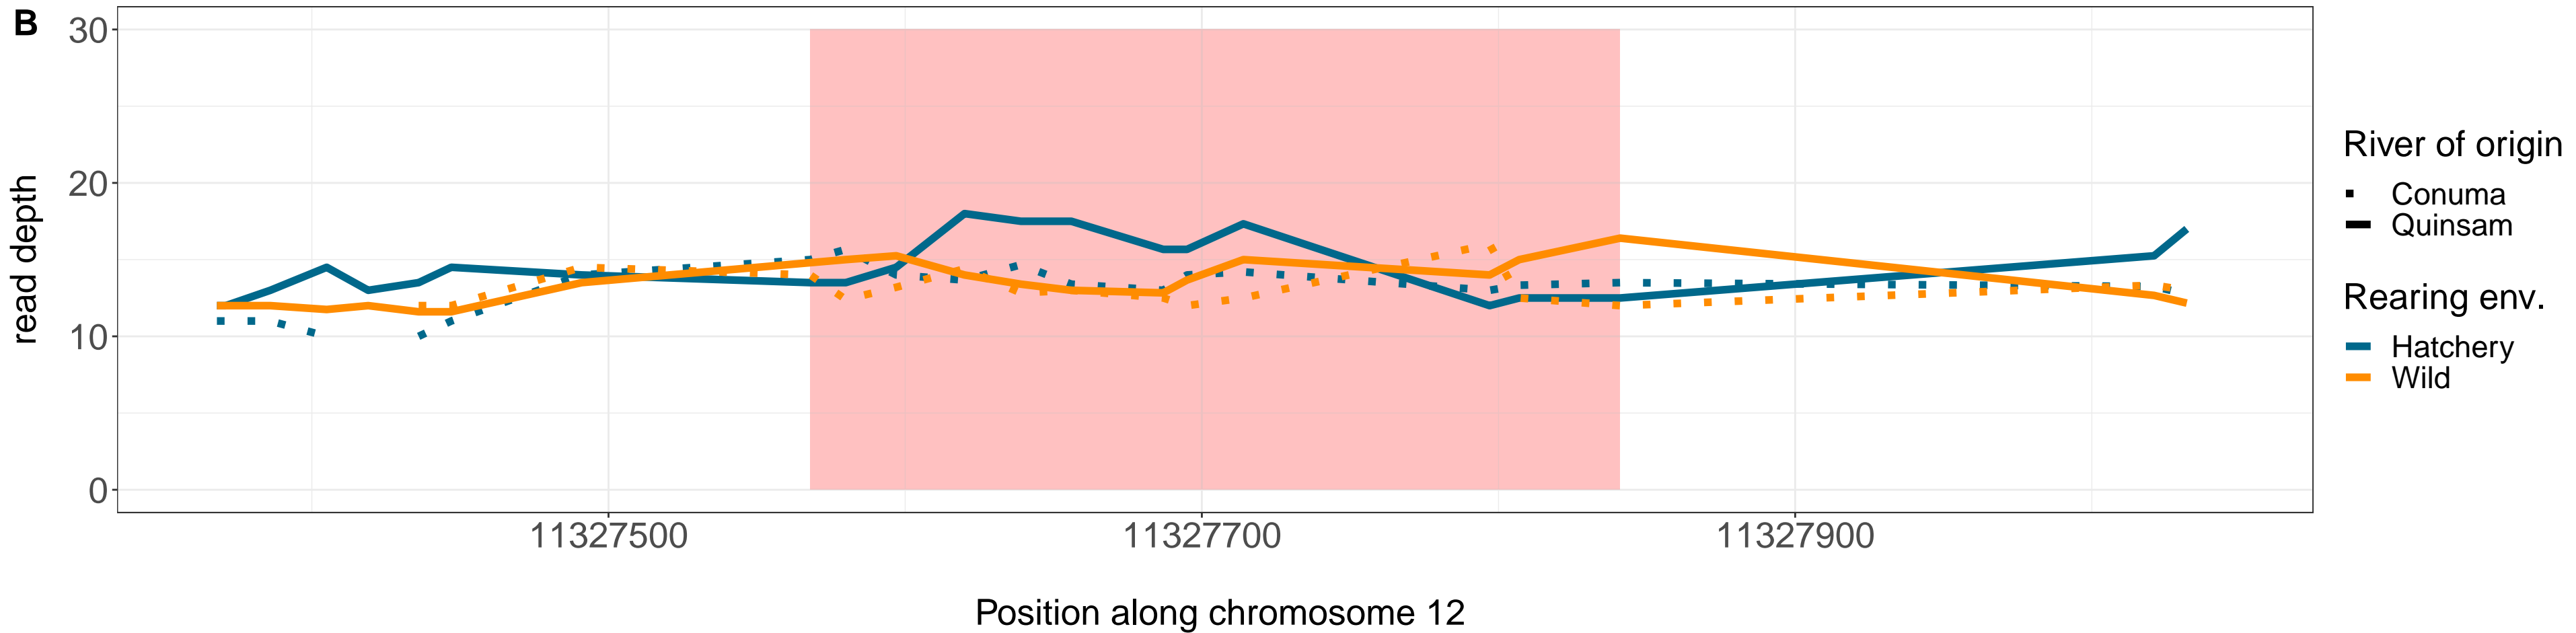

# DMR\_120

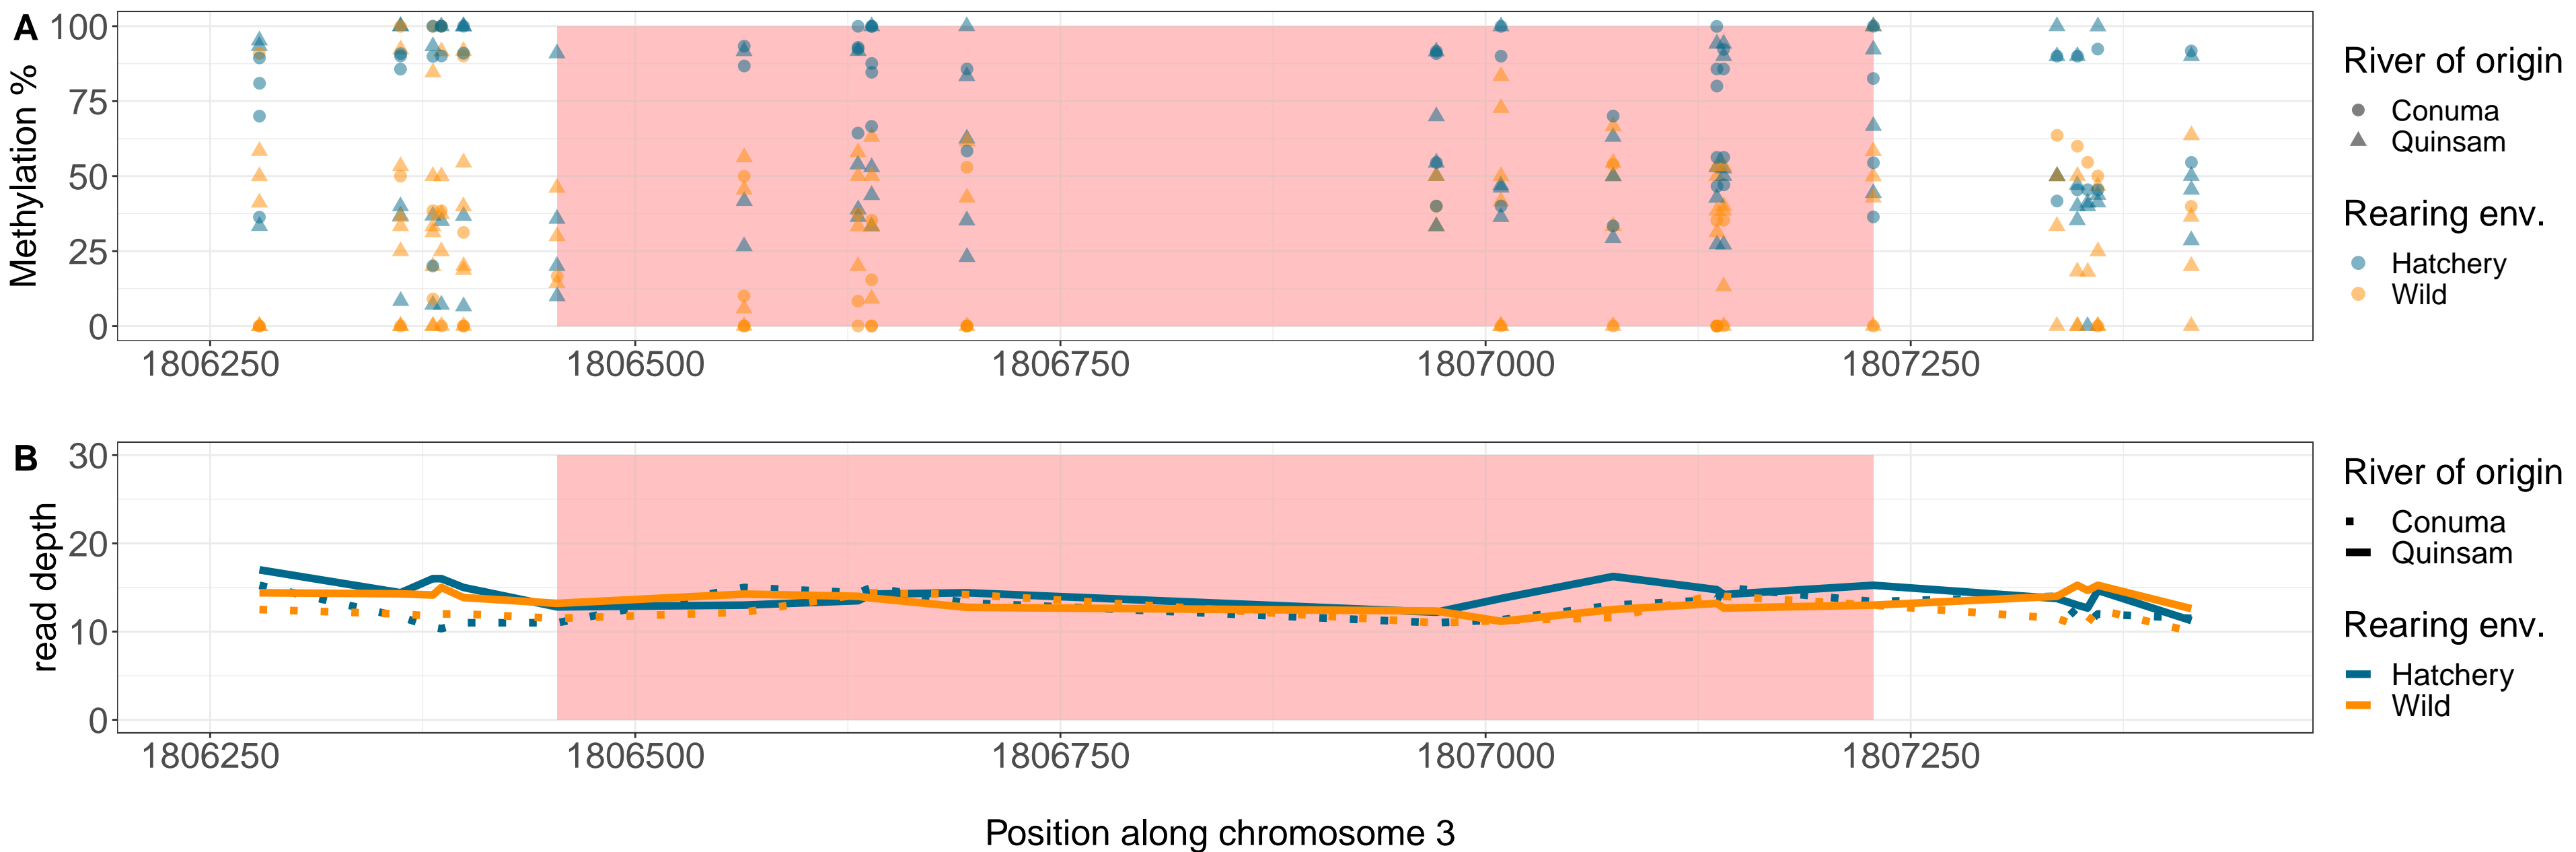



# DMR\_121

XM\_020463221.1

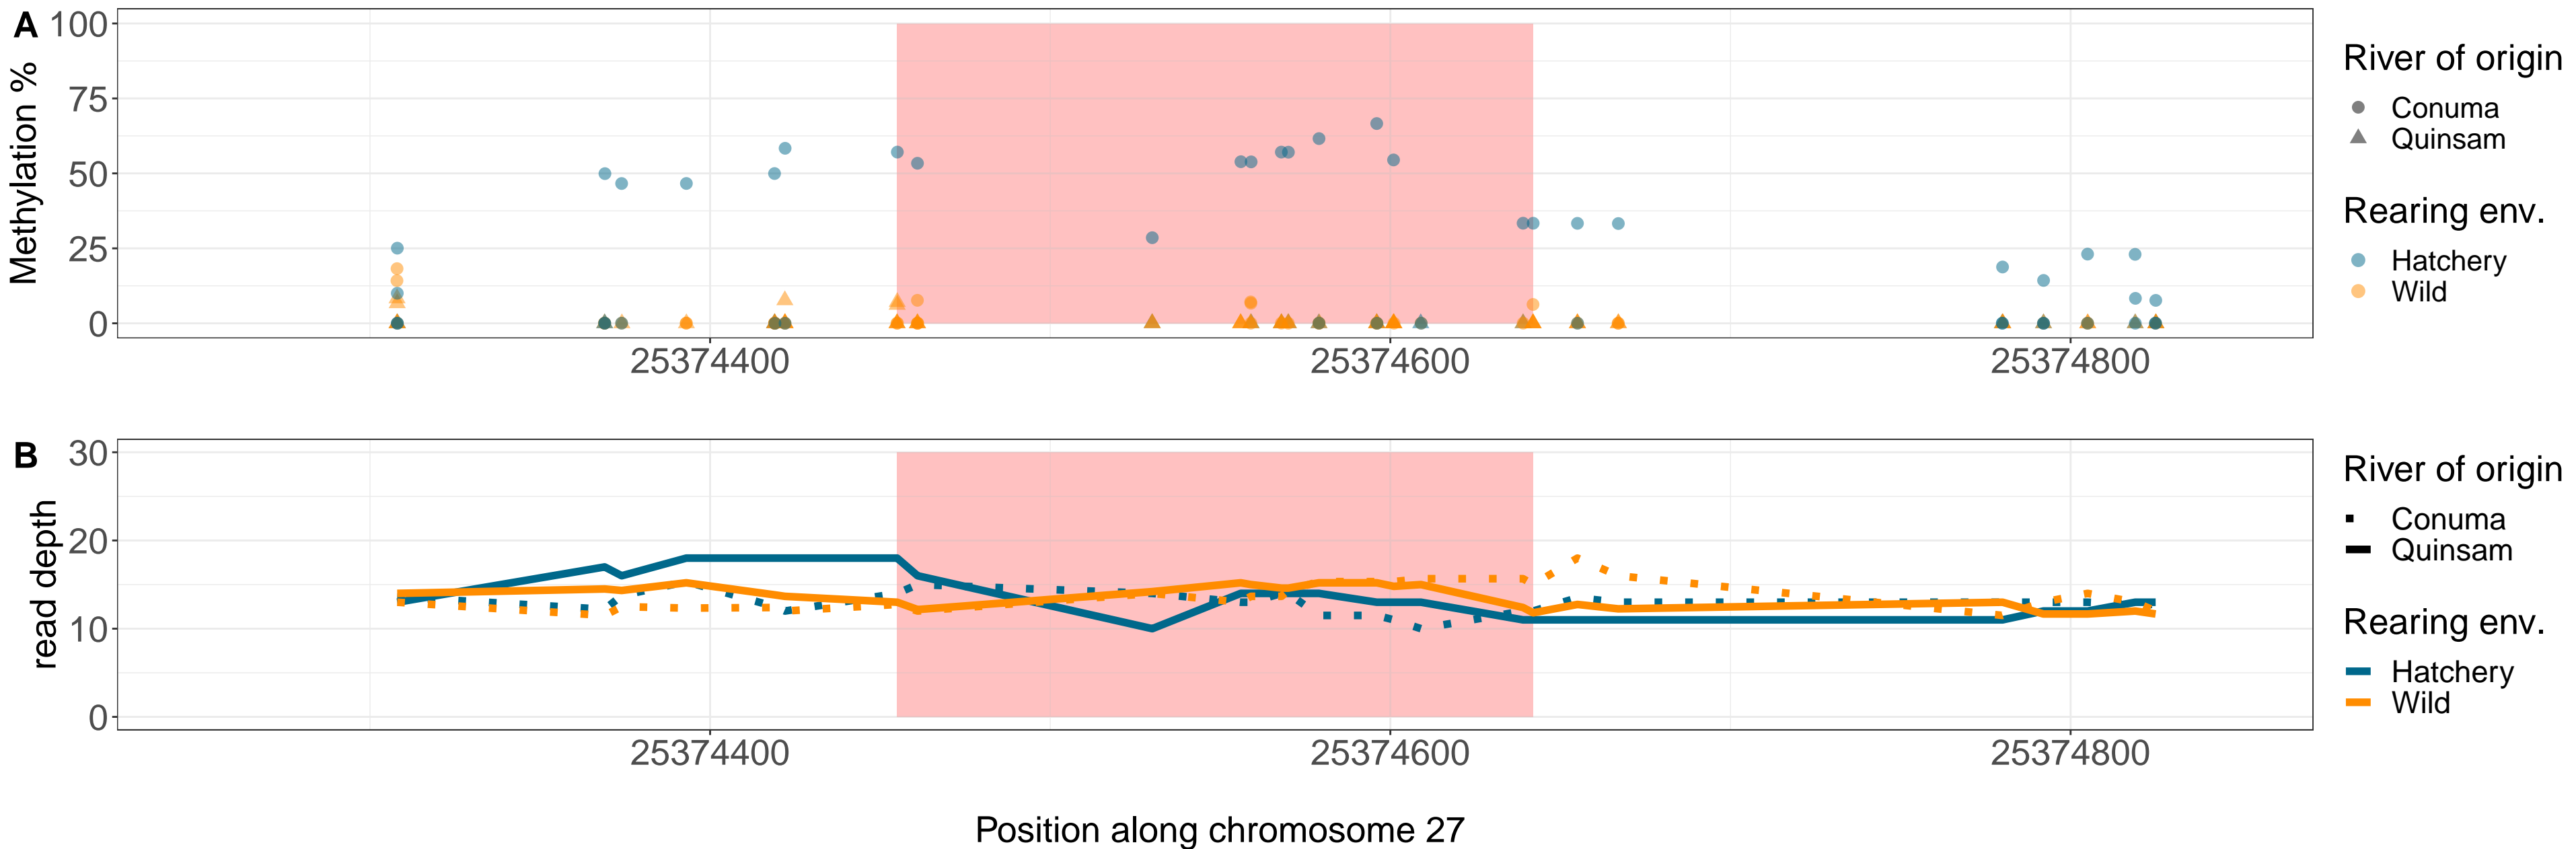

**A**

## DMR\_122

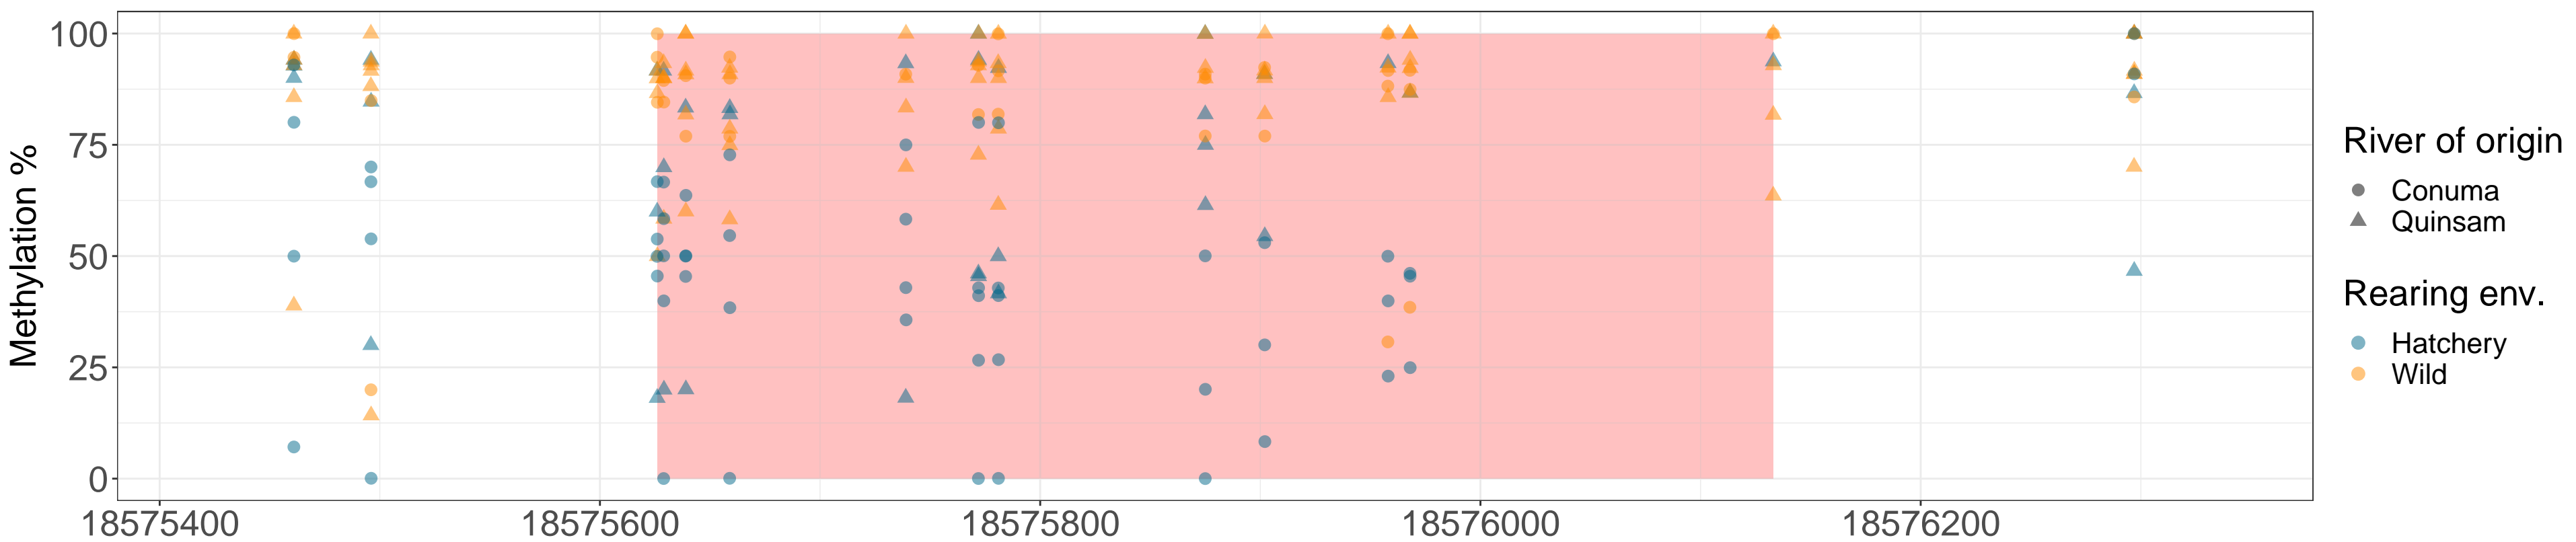**B**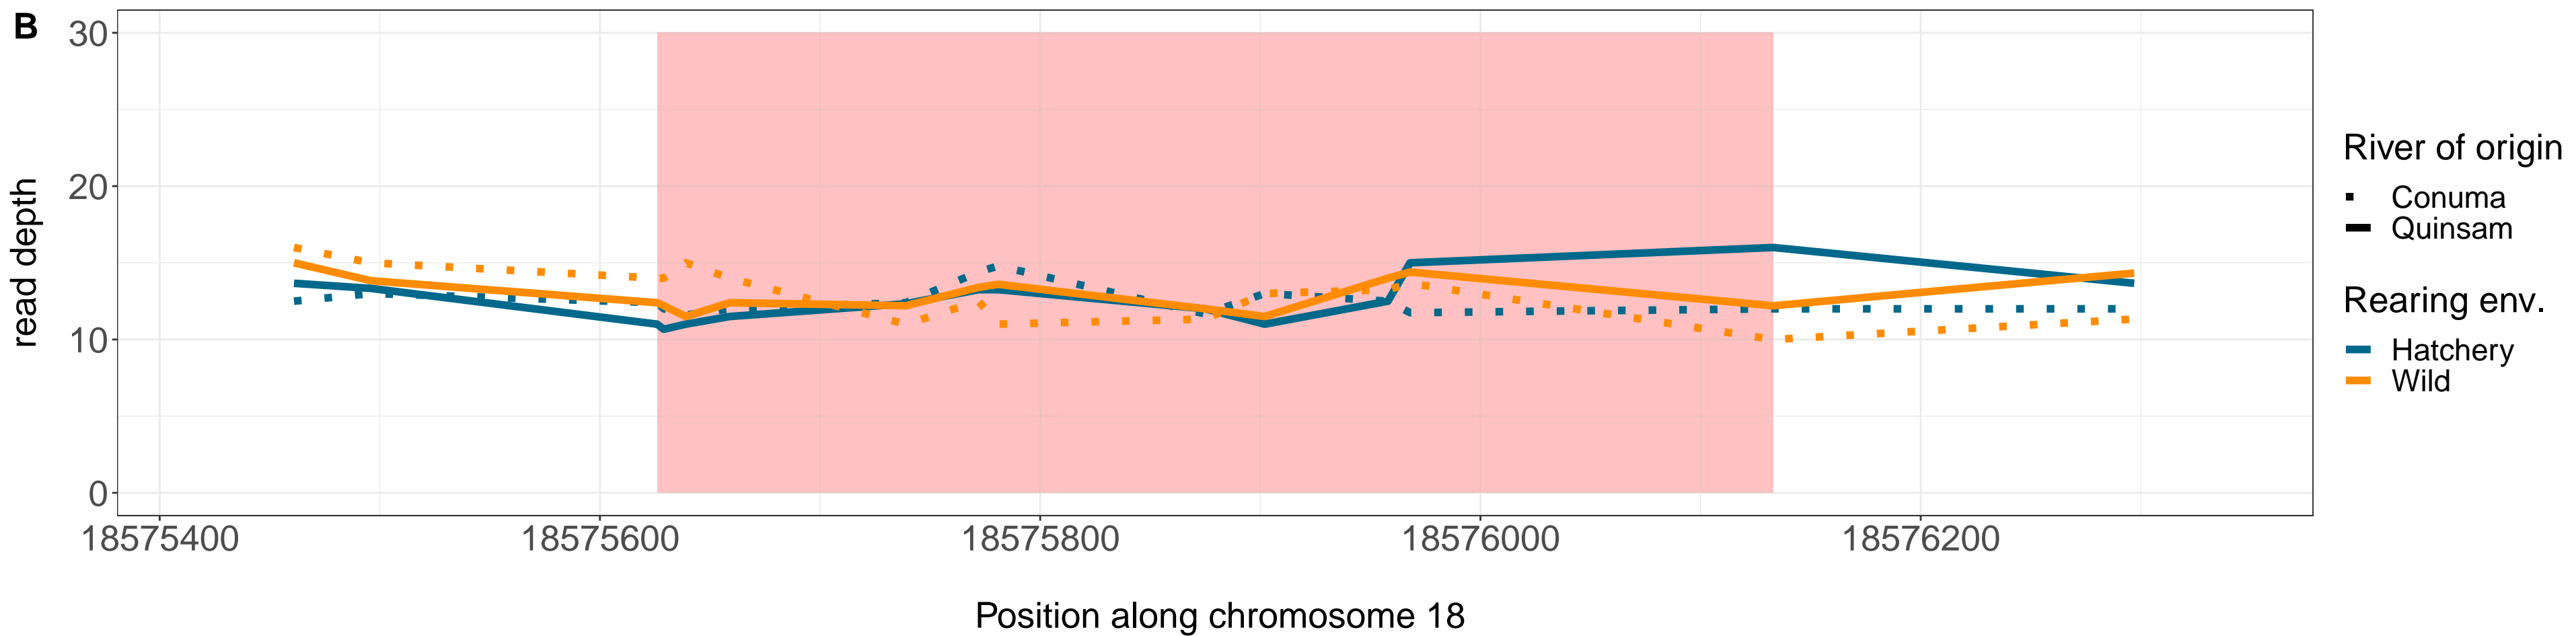

**A**

## DMR\_123

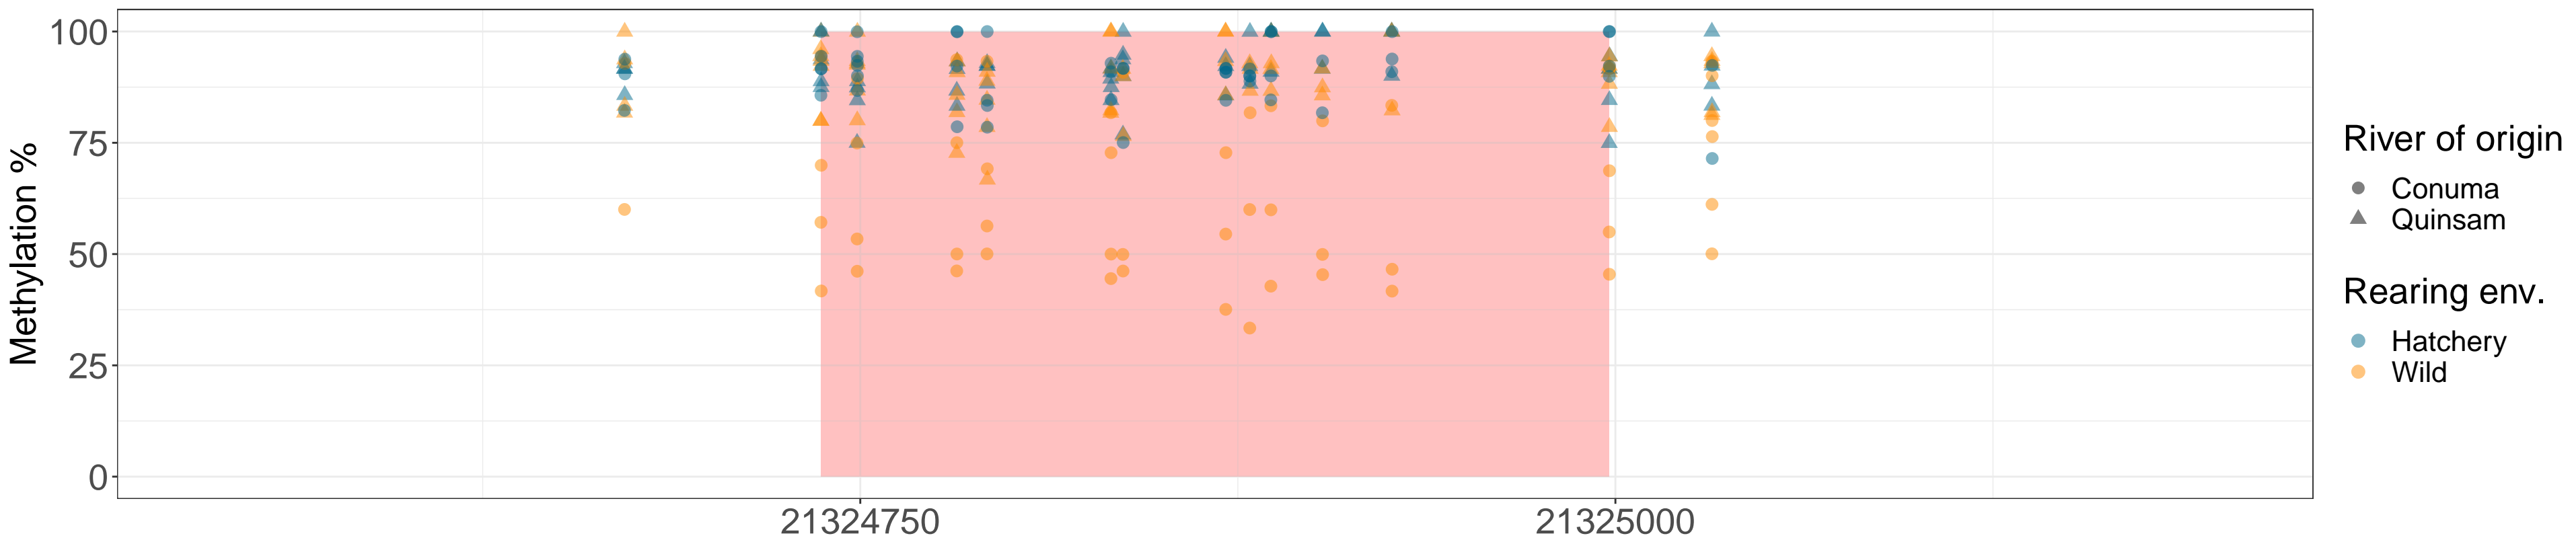**B**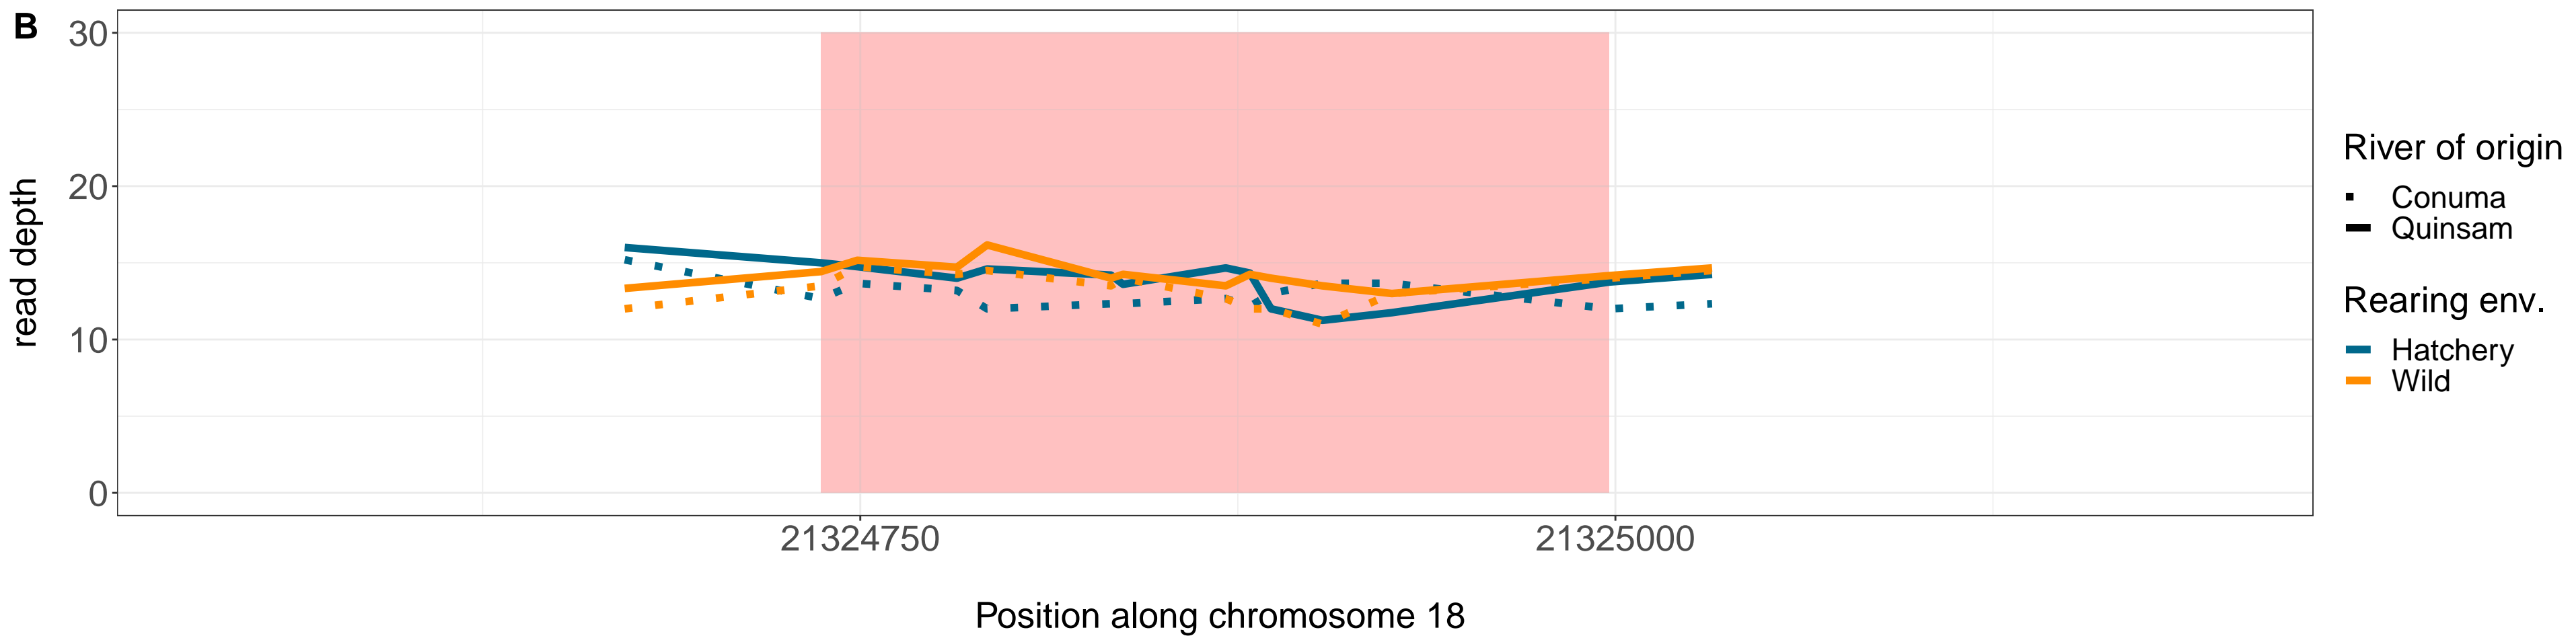

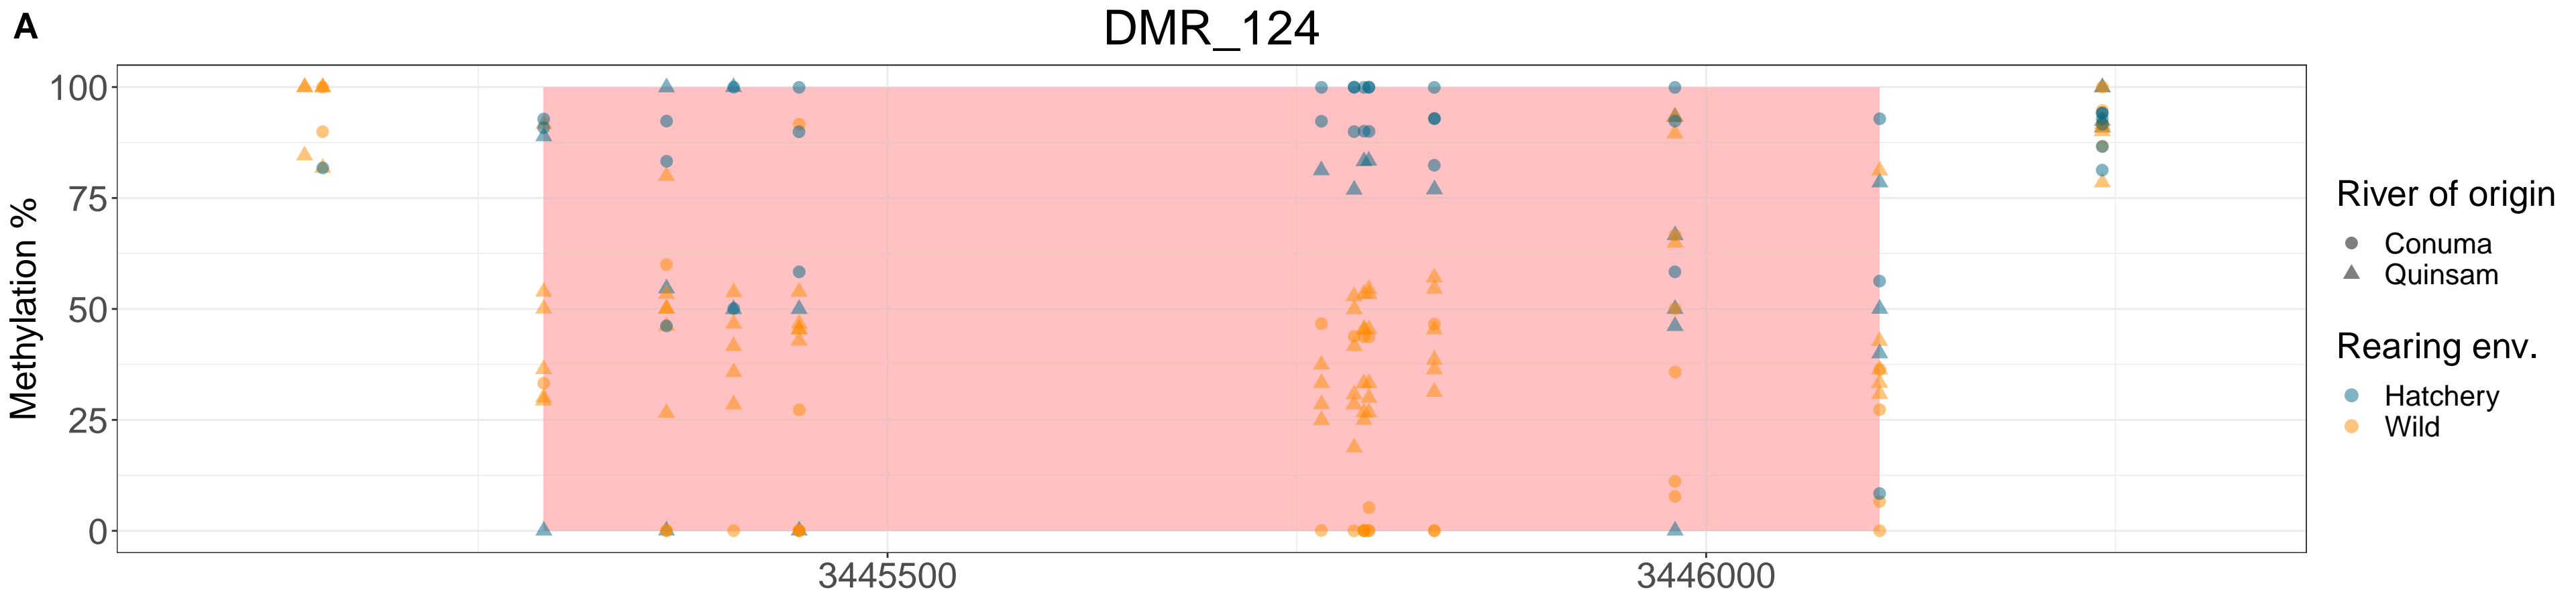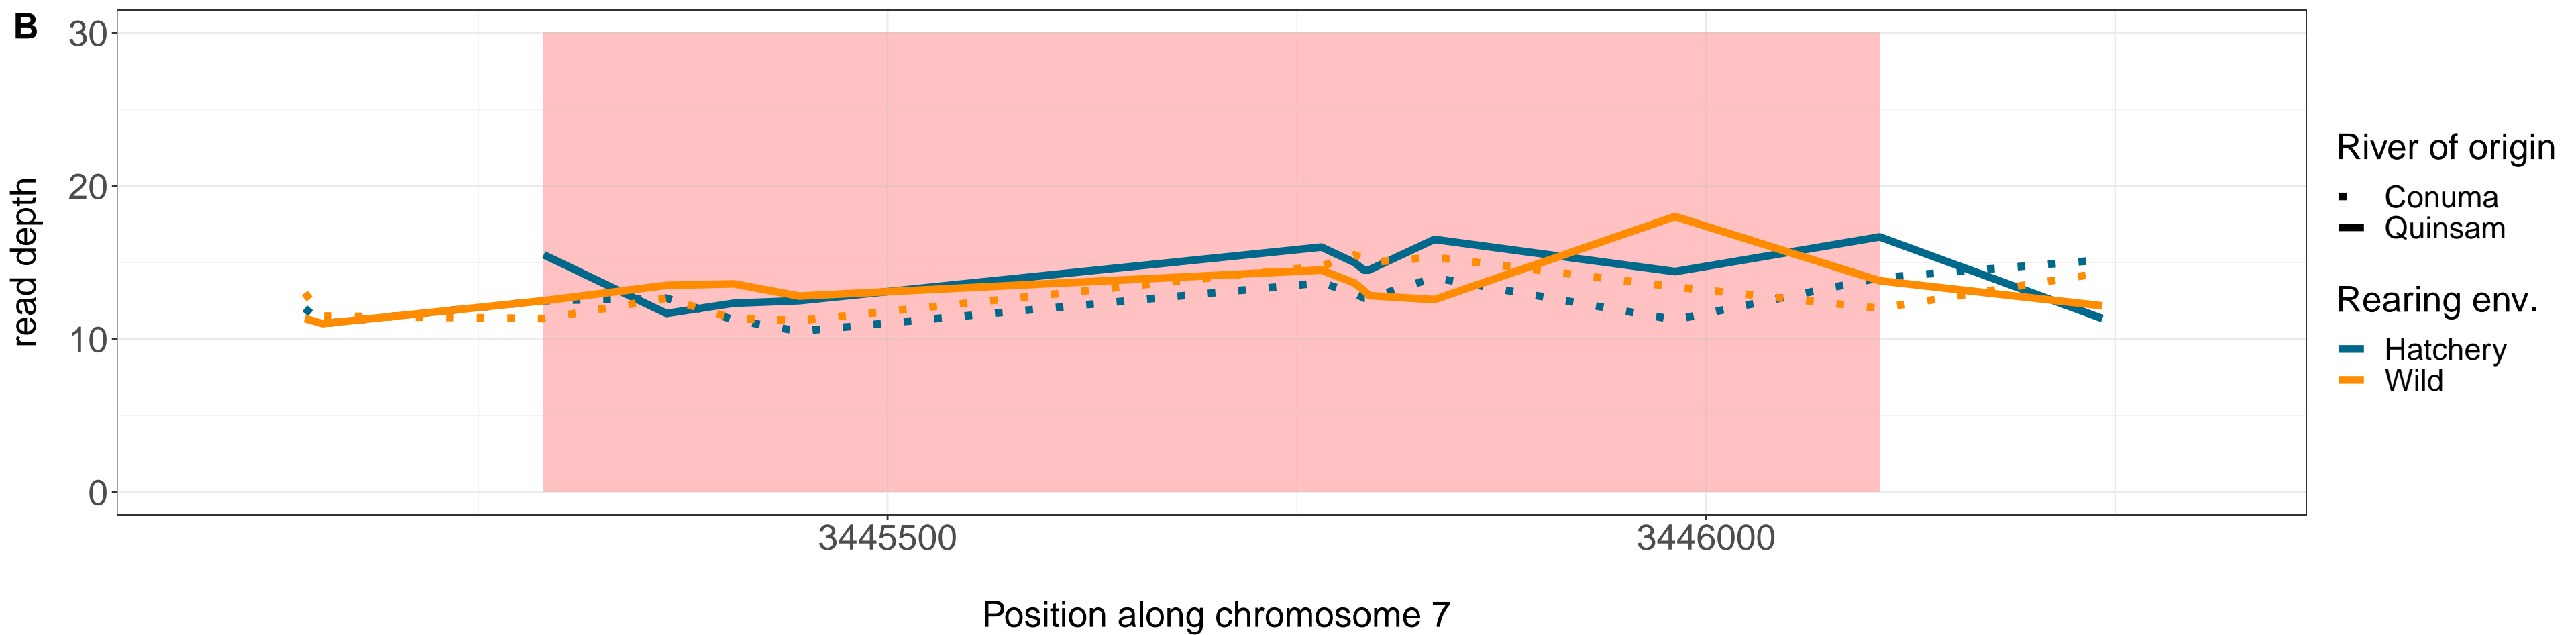

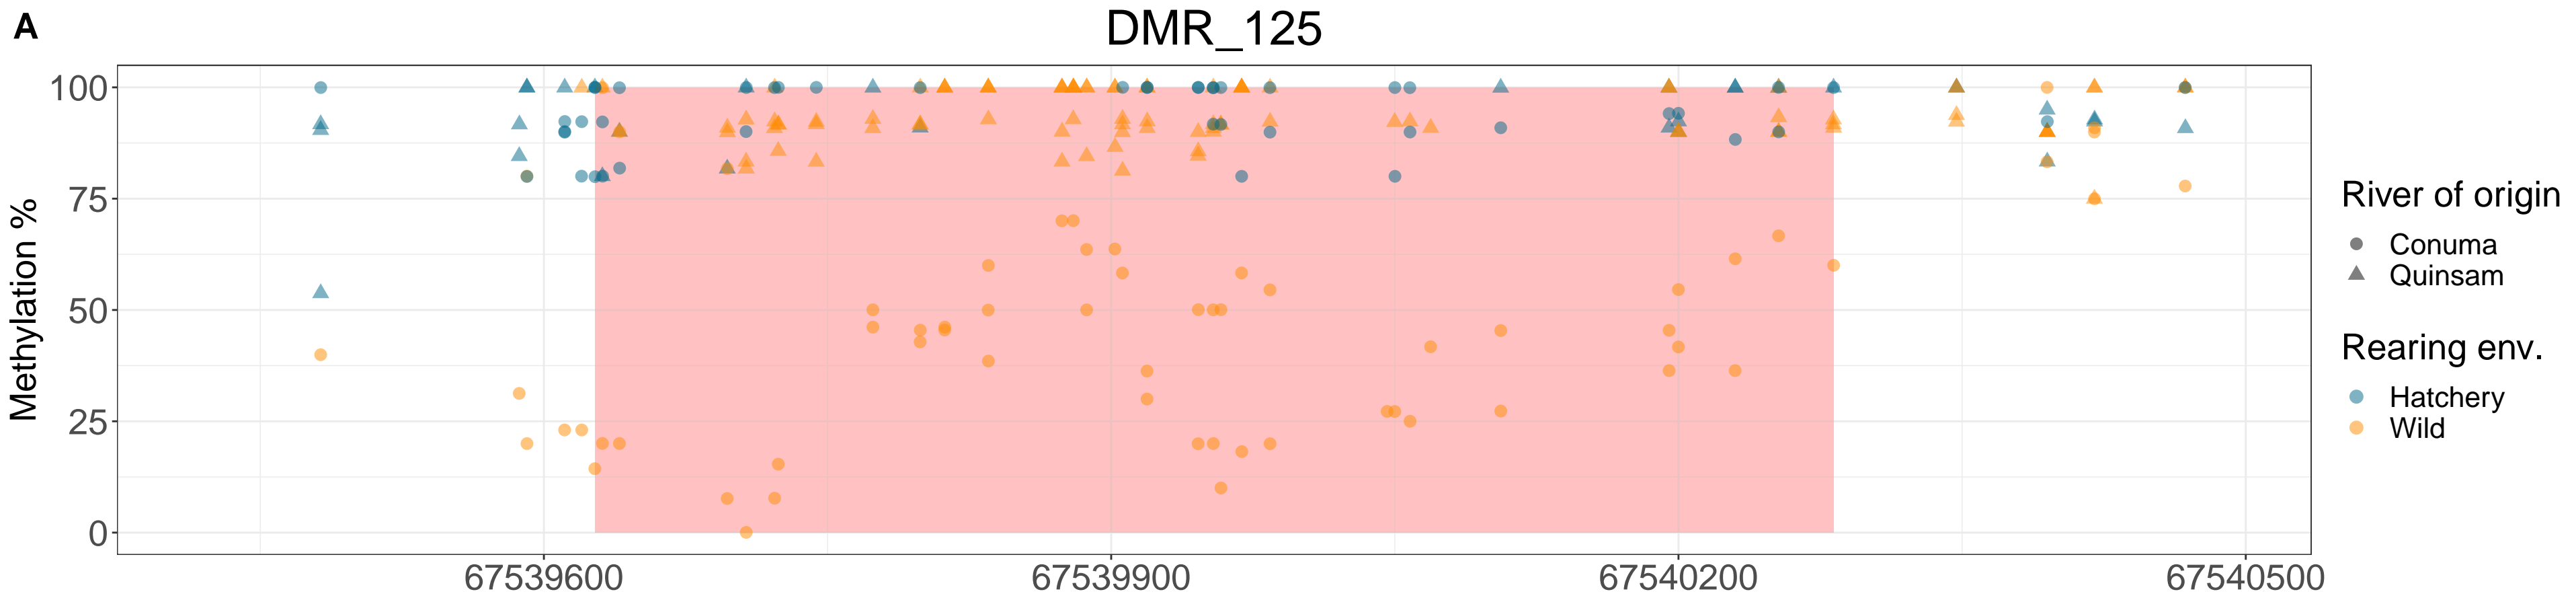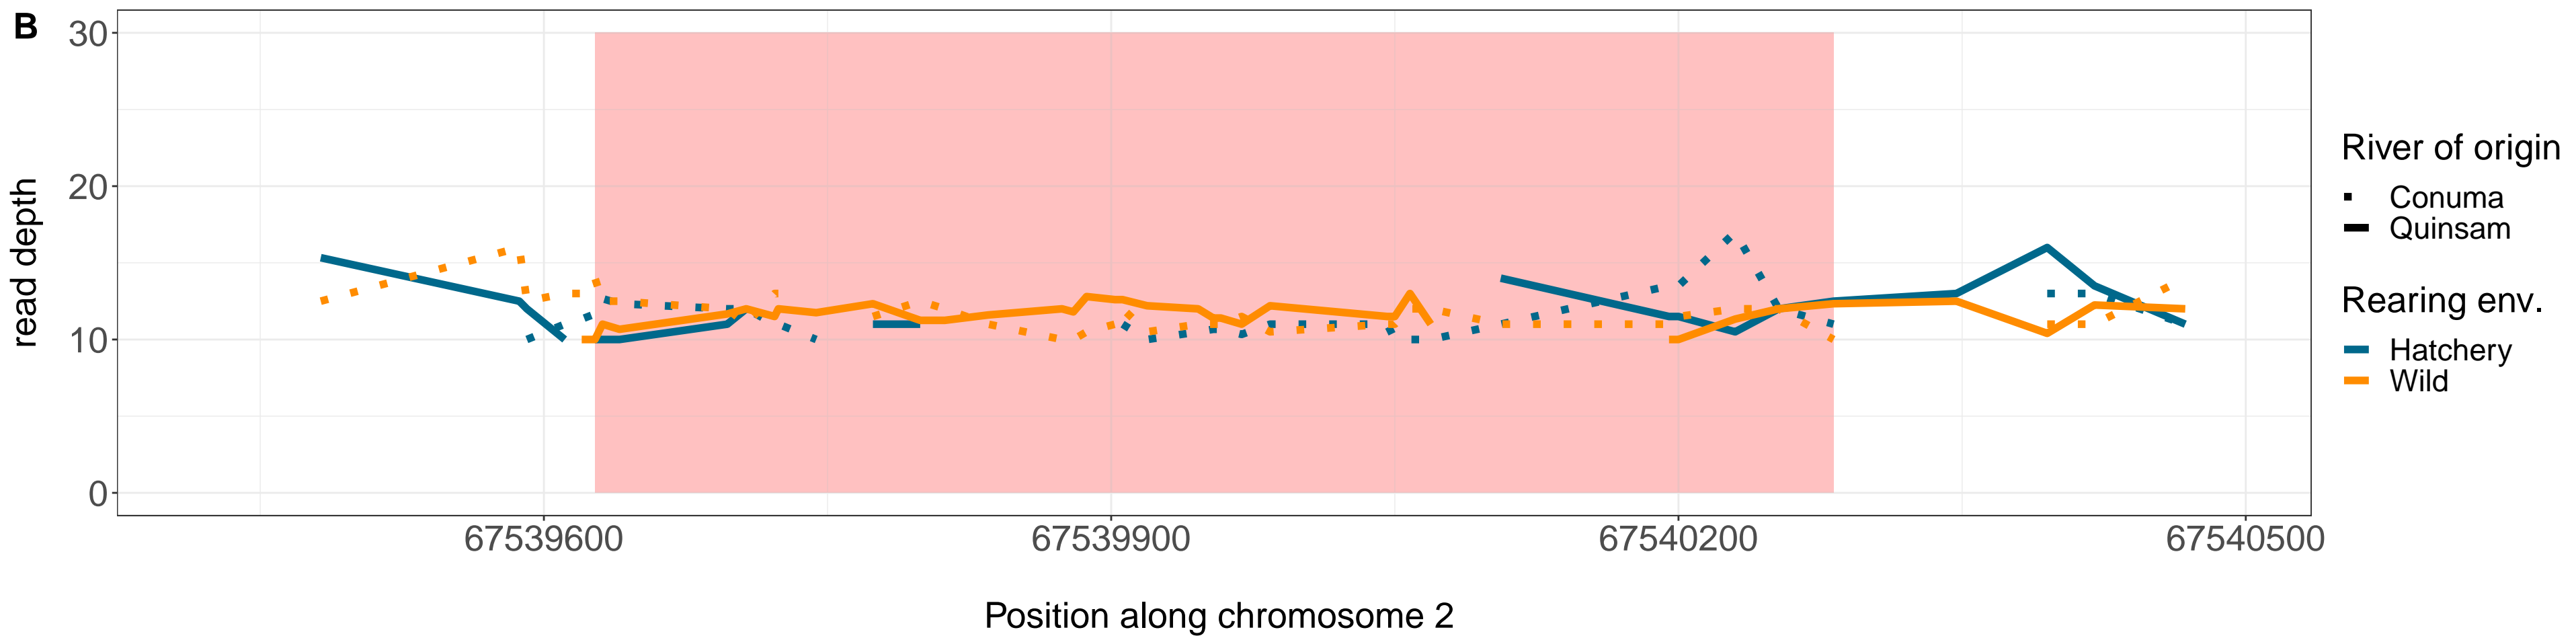

**A**

## DMR\_127

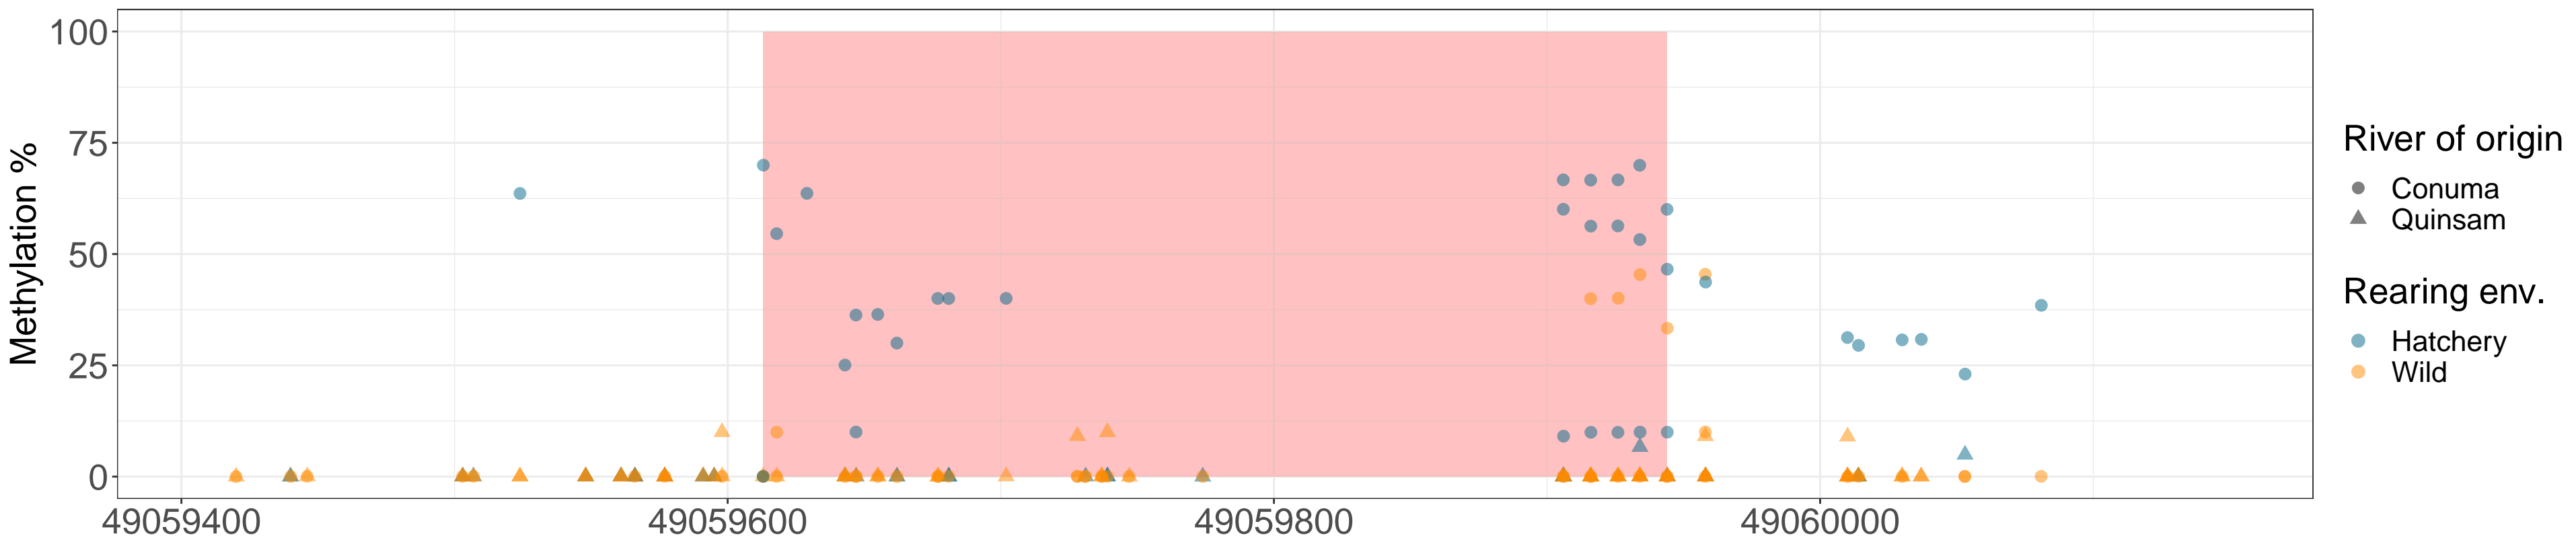**B**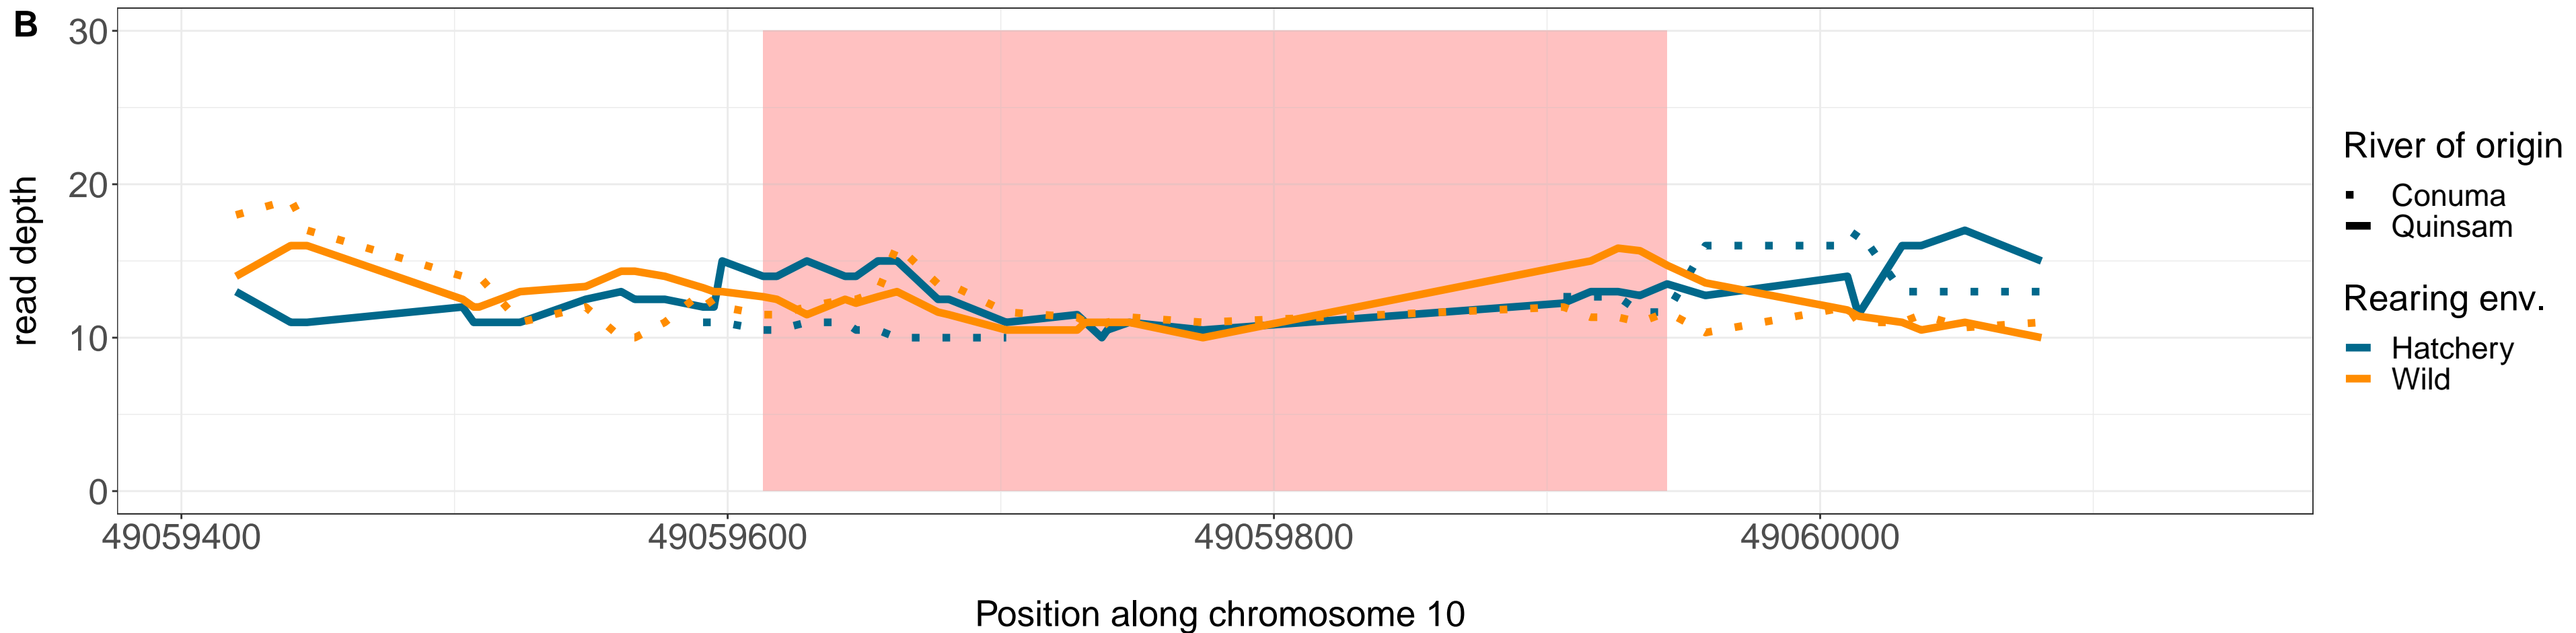

# DMR\_128

XM\_020491335.1

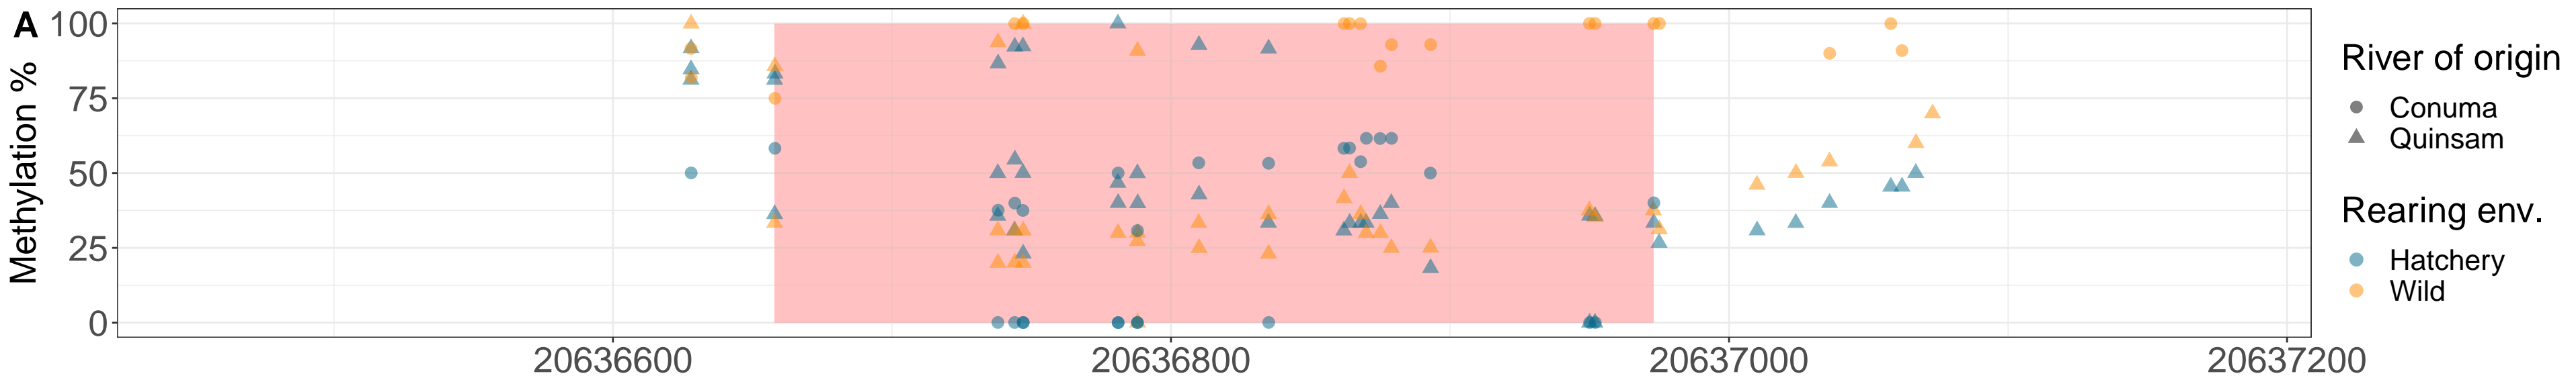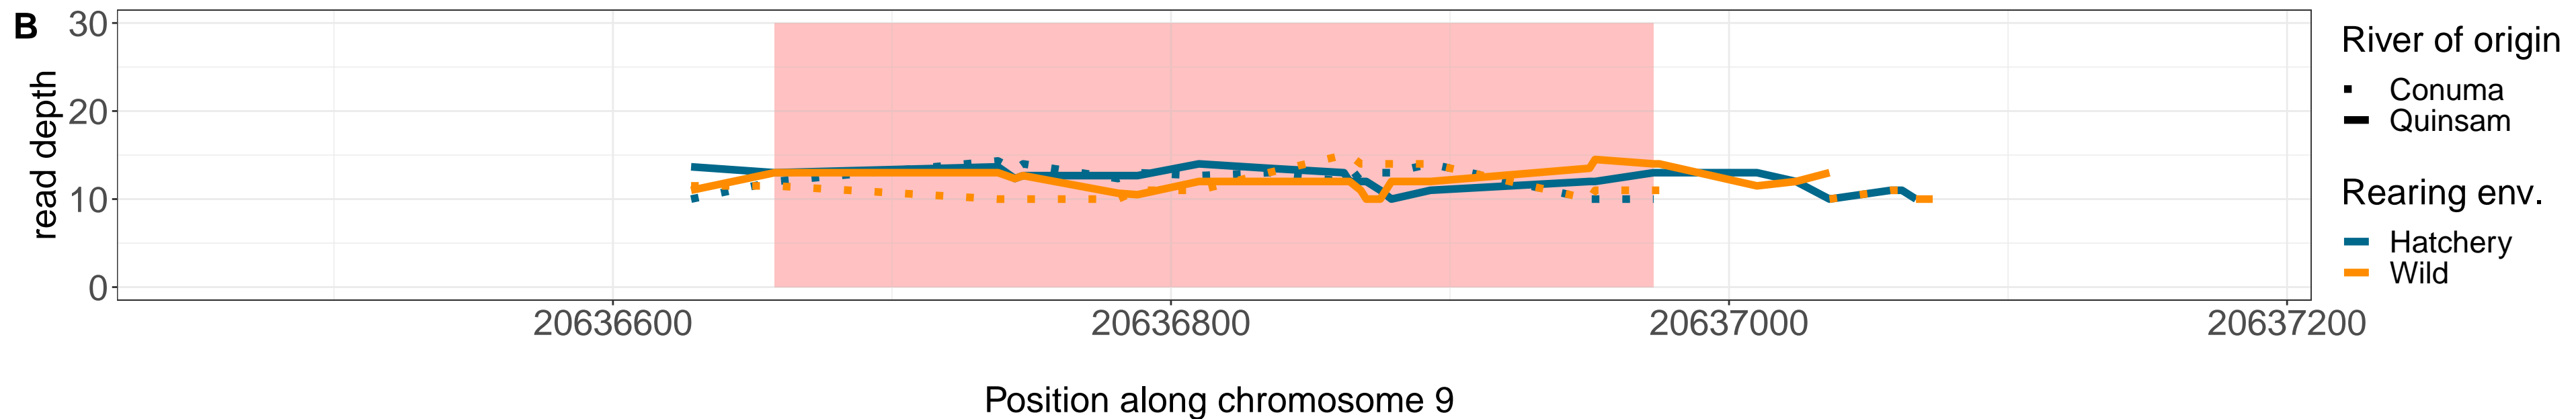

# DMR\_129

XM\_020462712.1

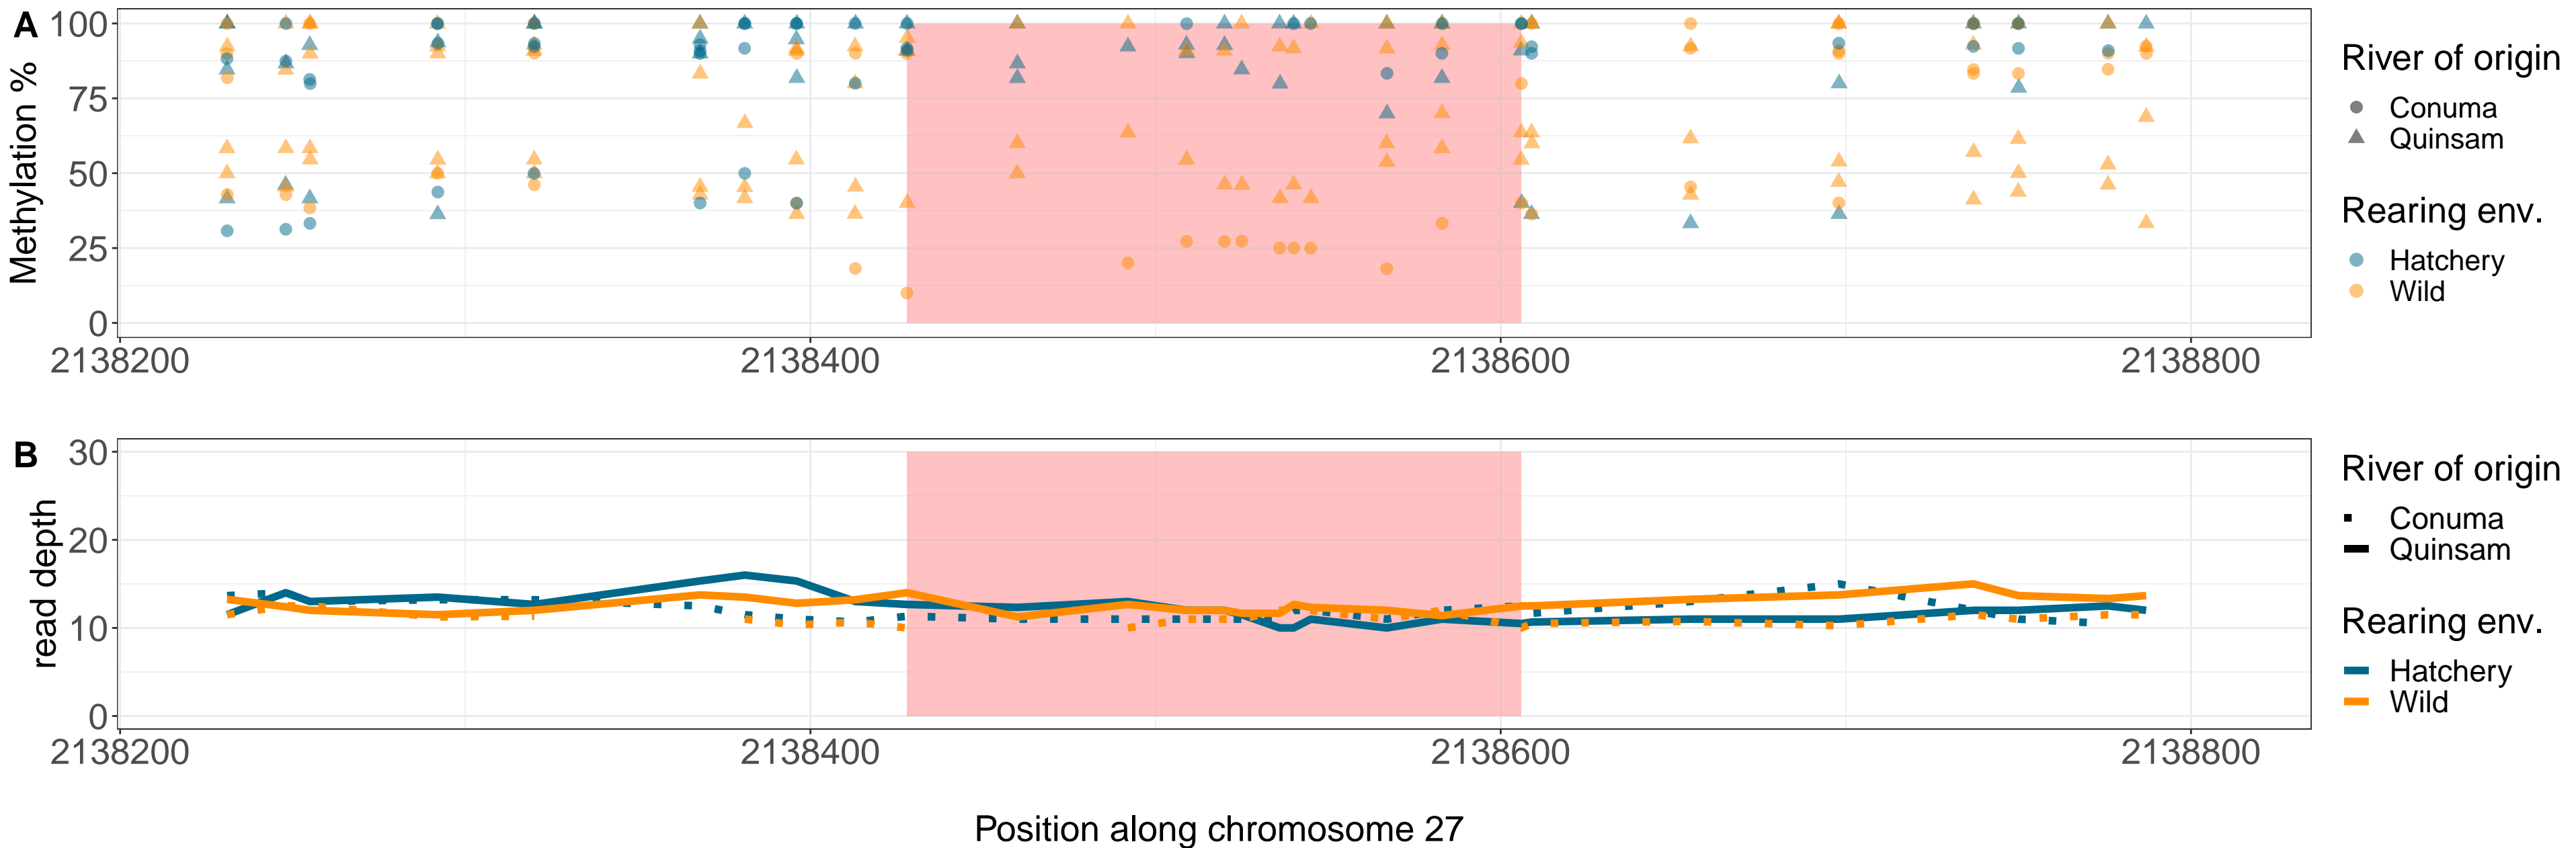



**A**

## DMR\_130

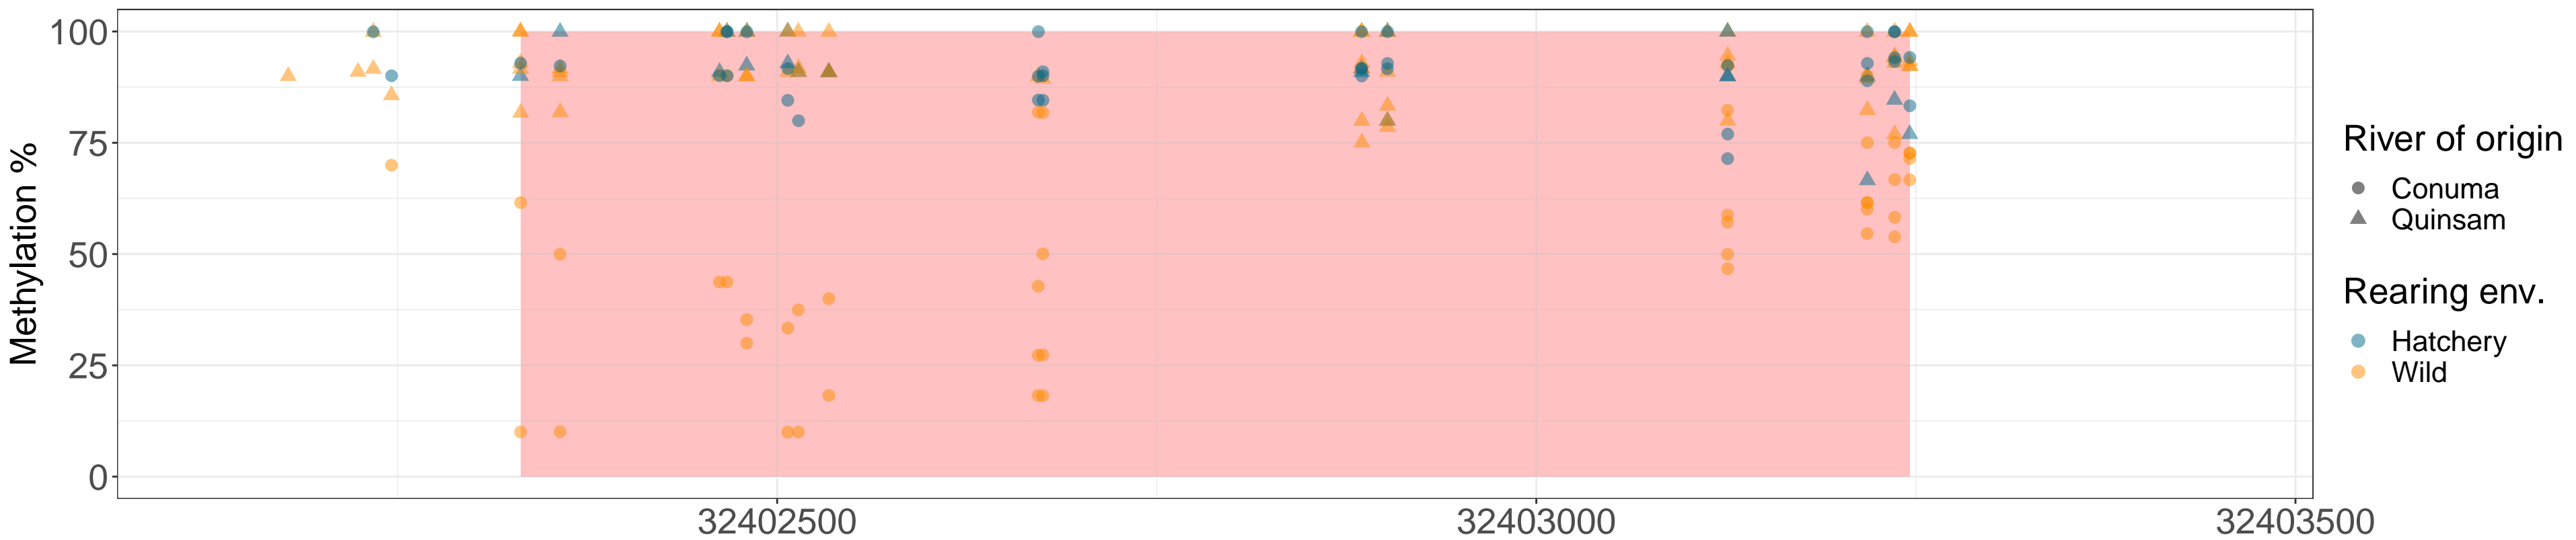**B**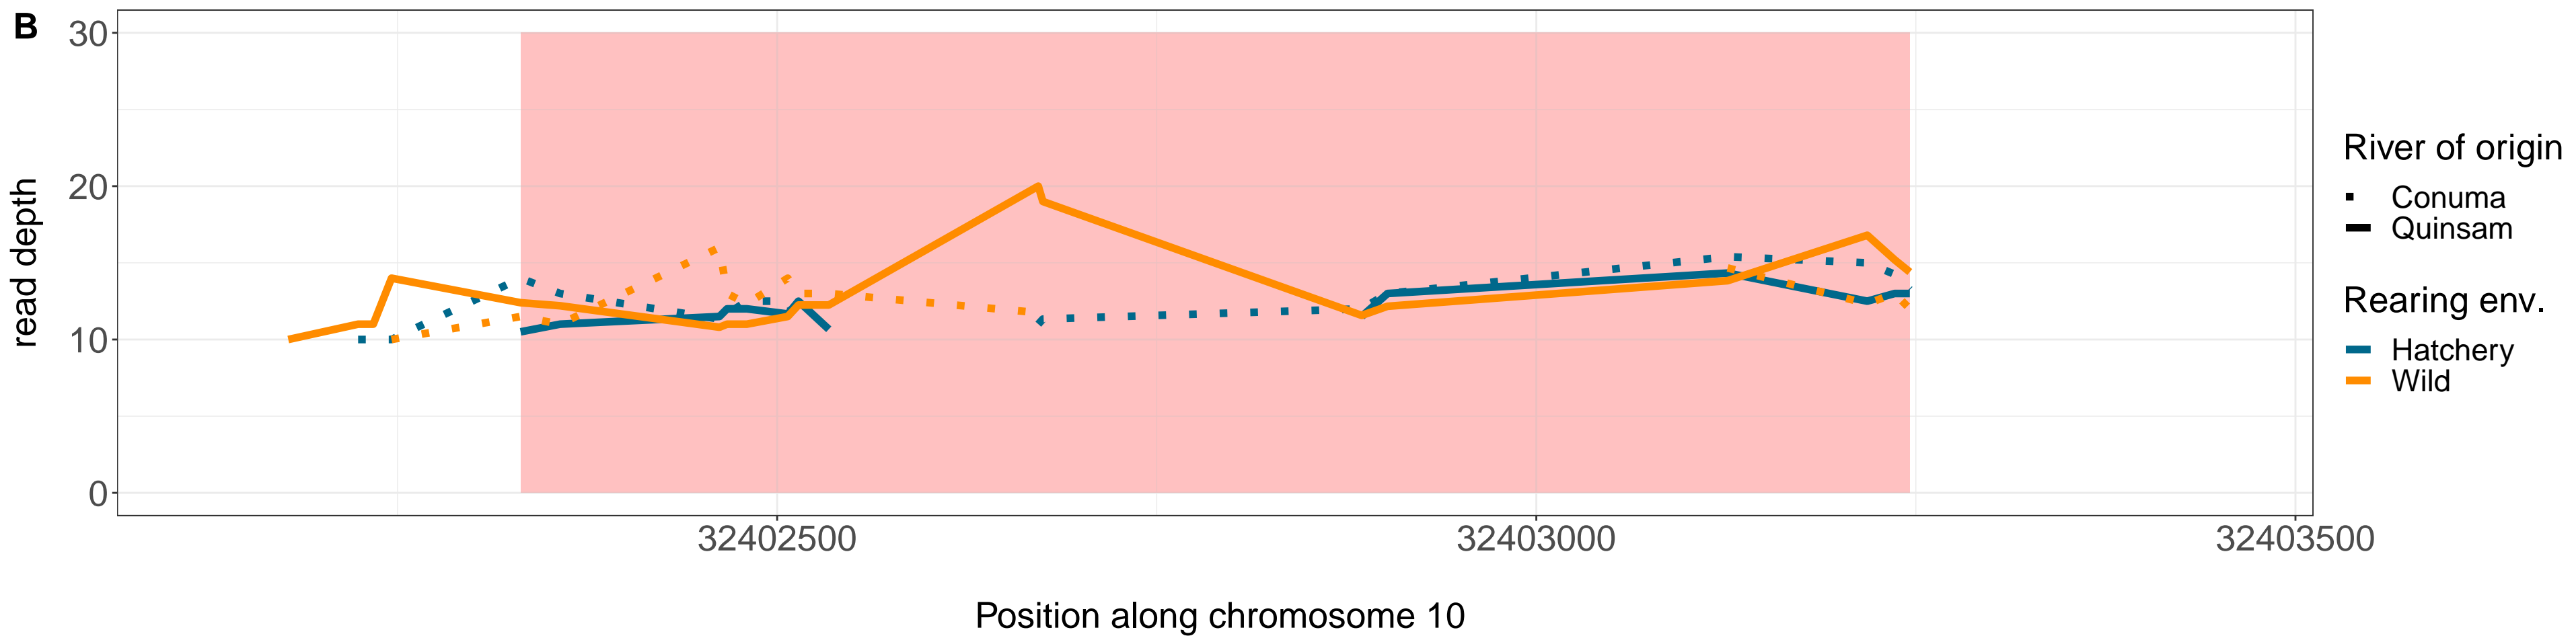

**A**

## DMR\_131

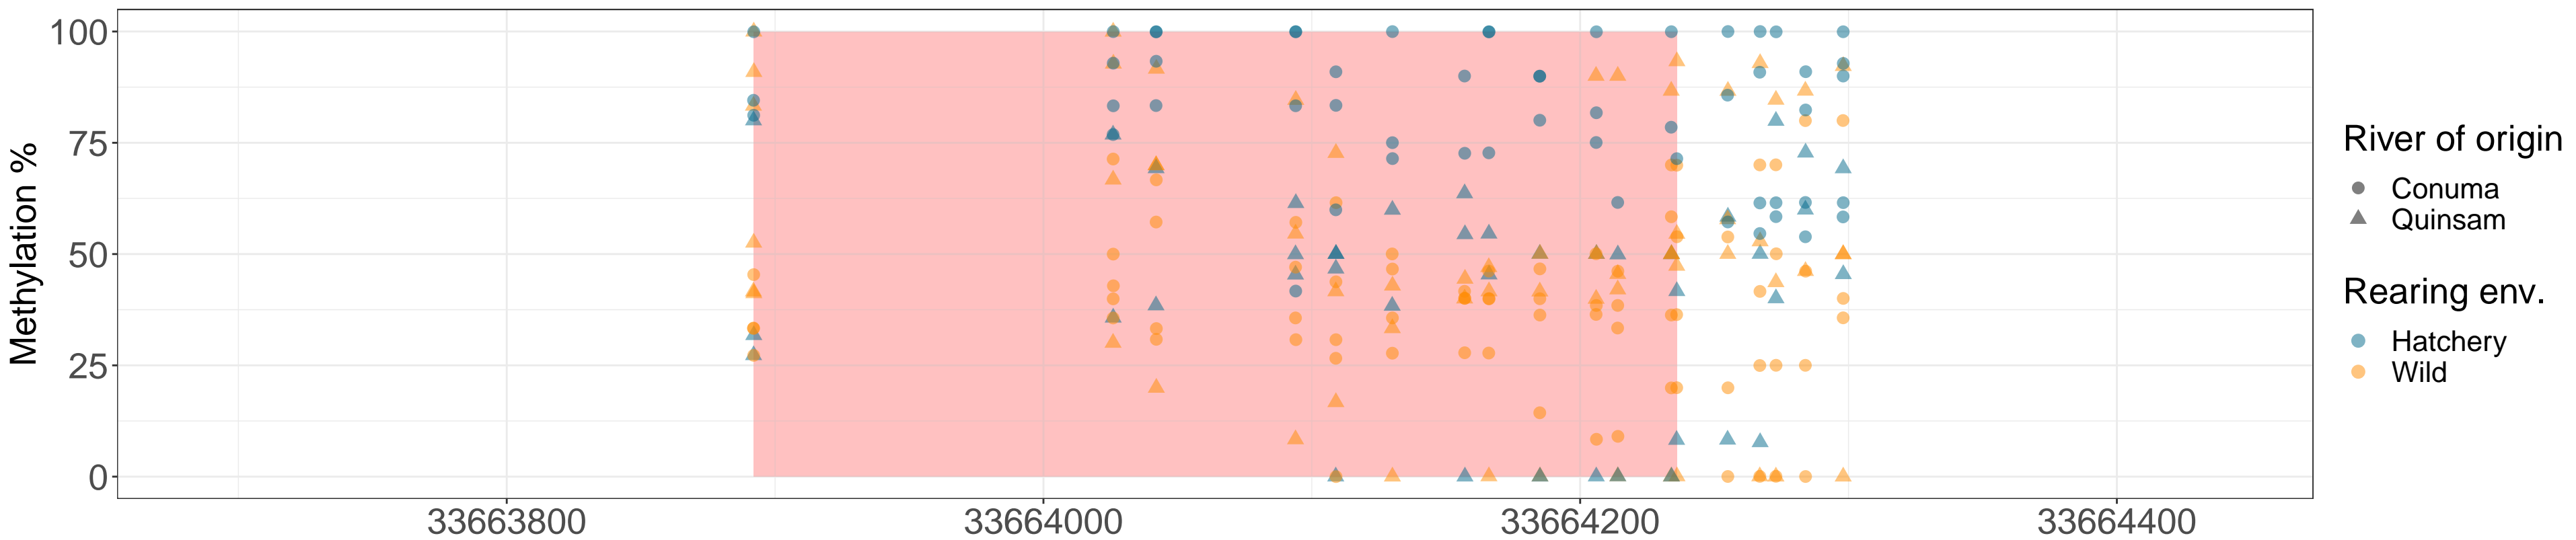**B**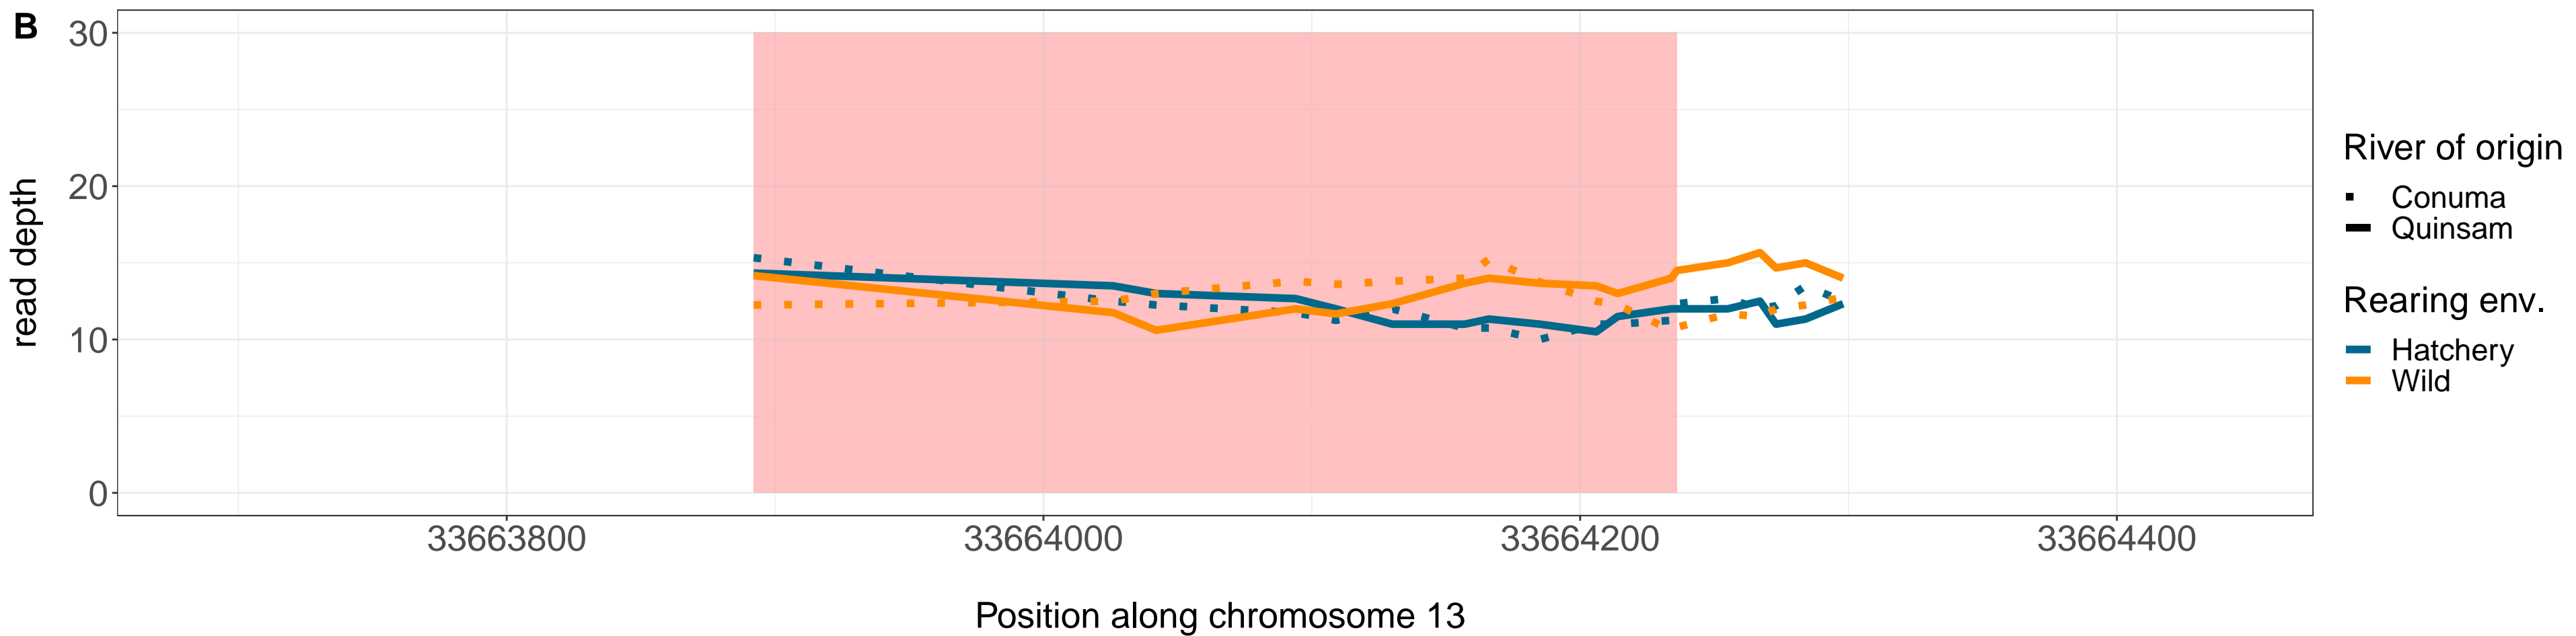

# DMR\_133

XM\_020498586.1

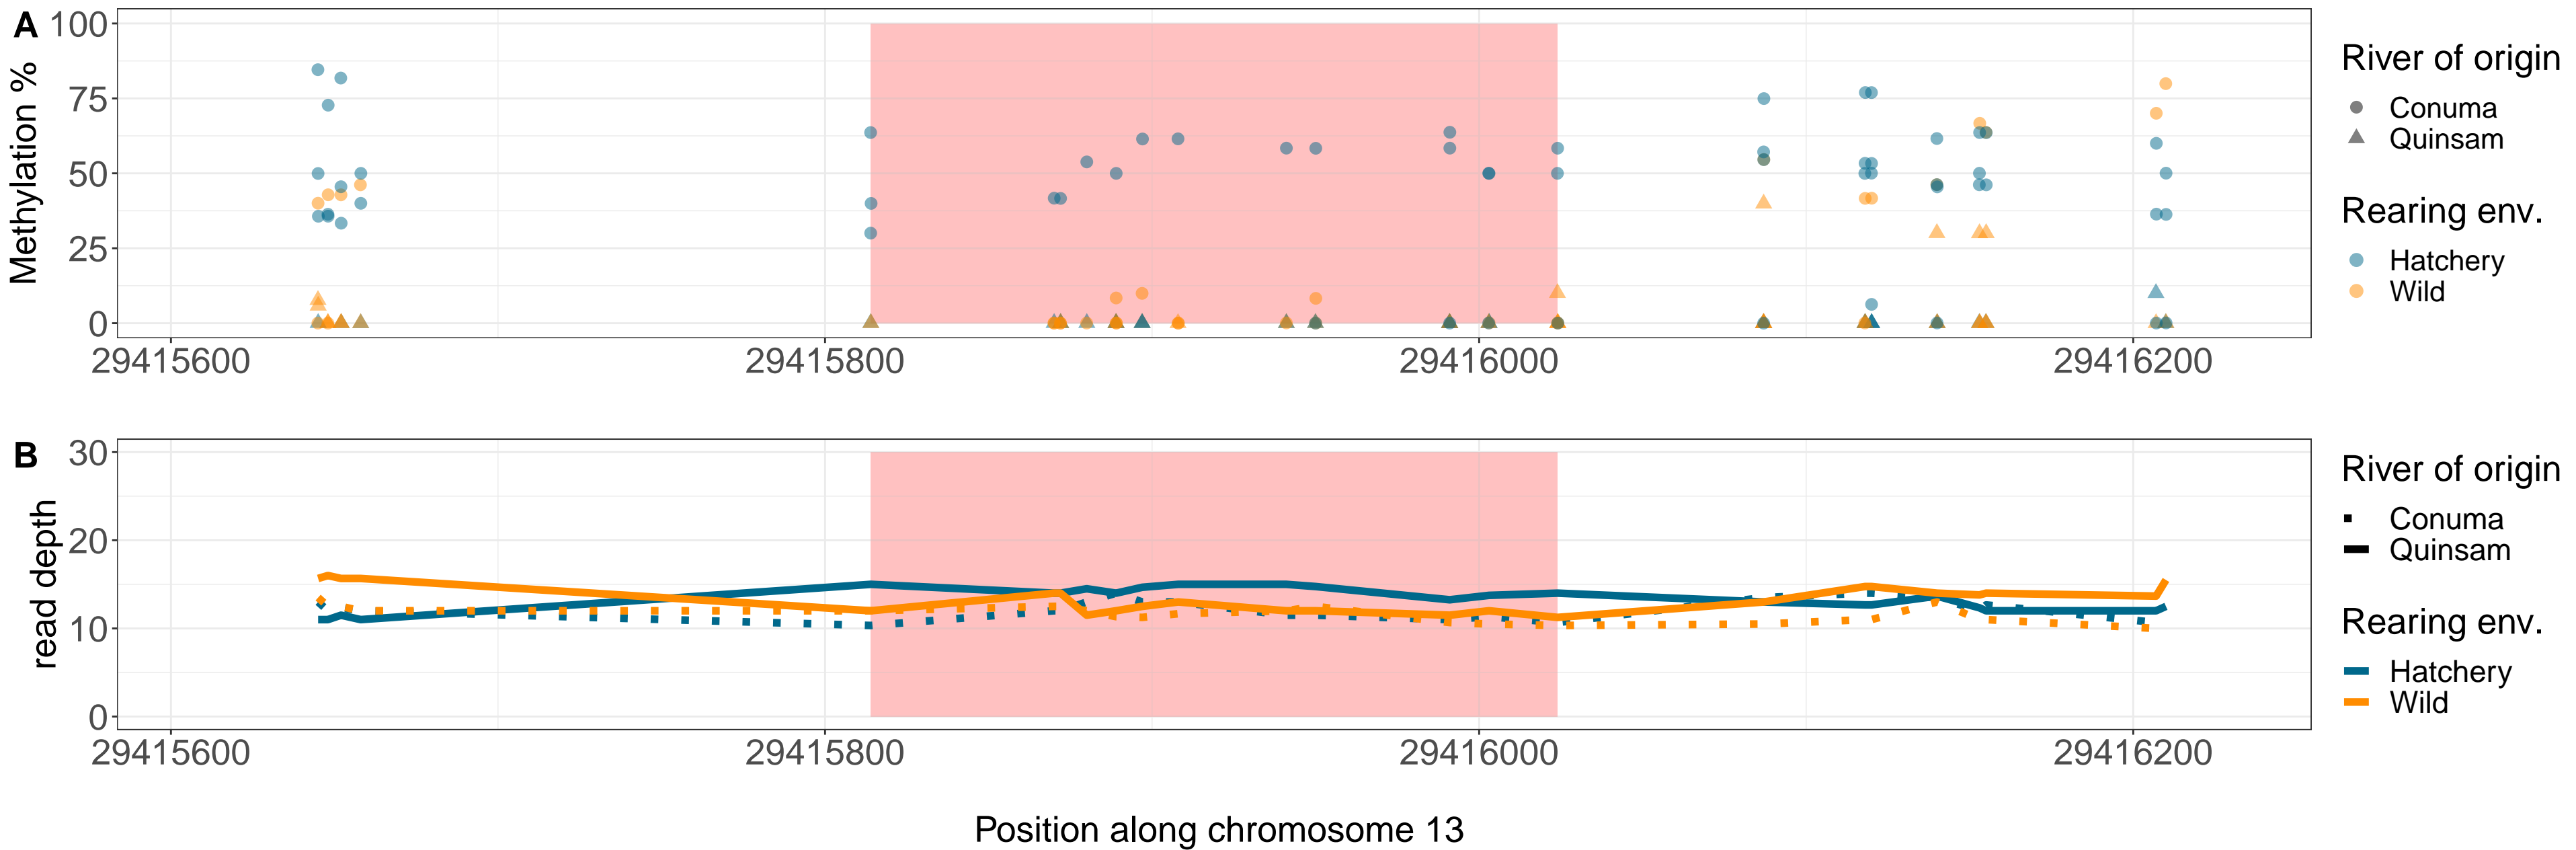

**A**

## DMR\_134

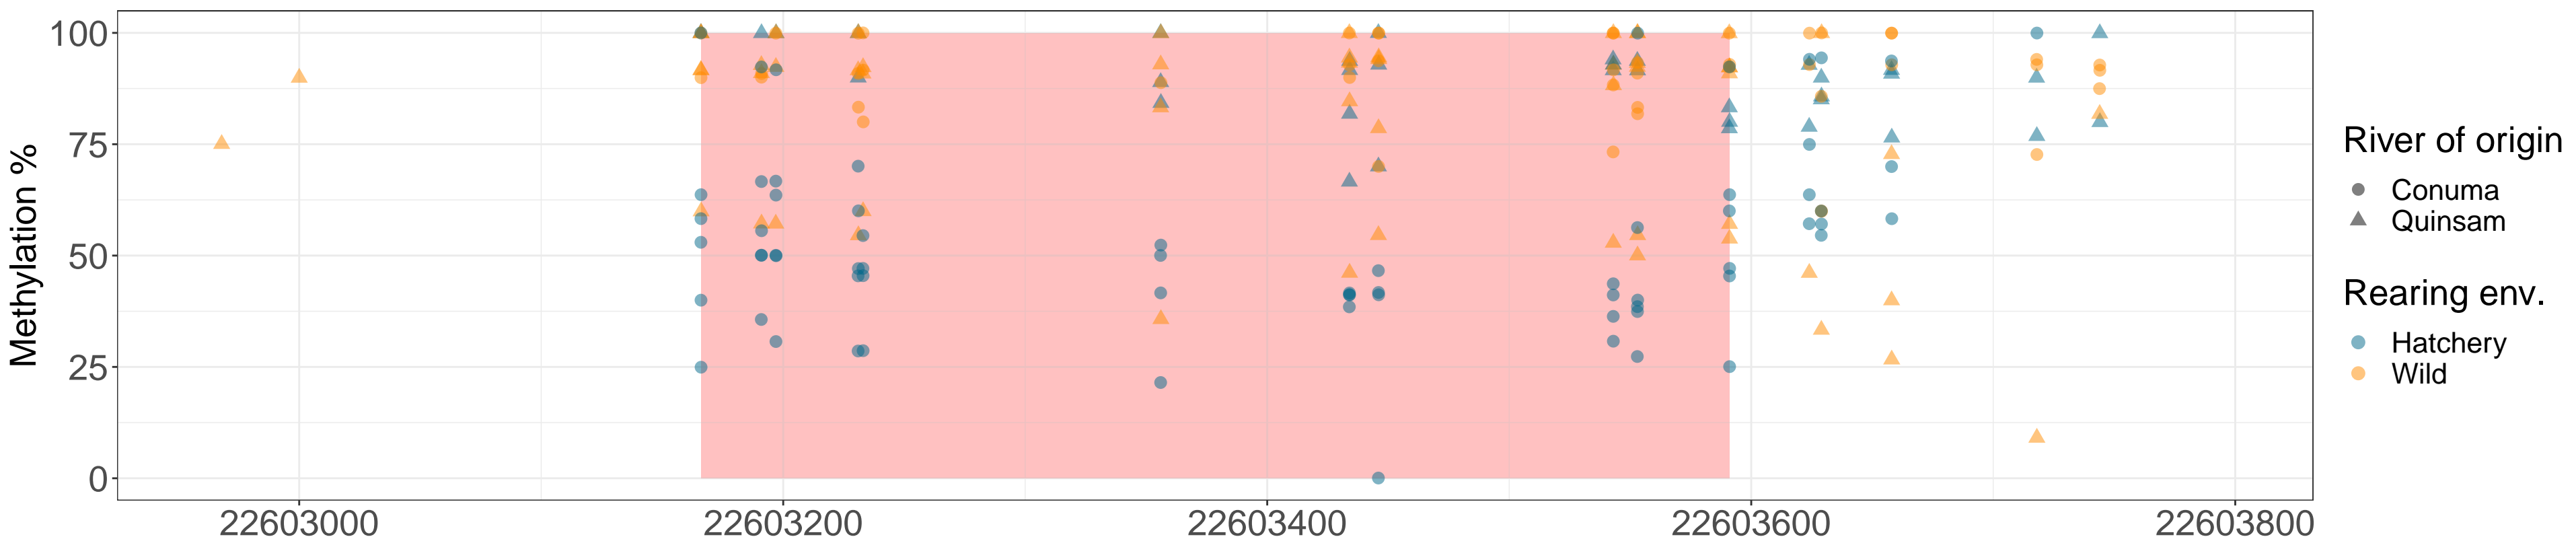**B**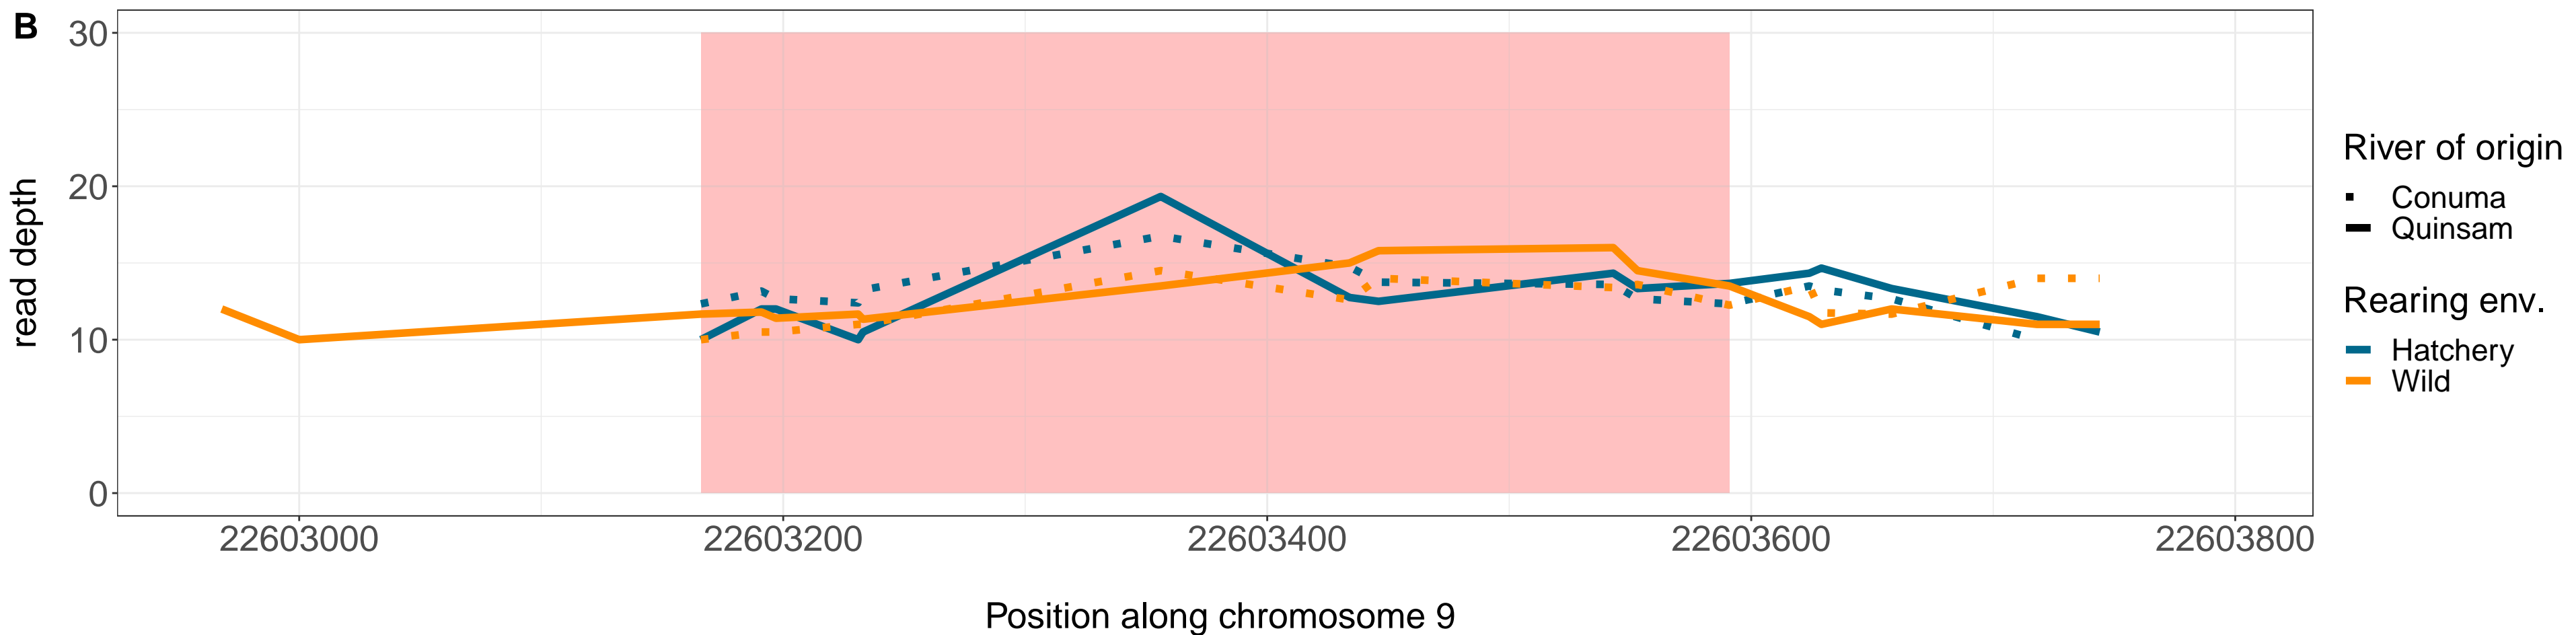

**A**

## DMR\_136

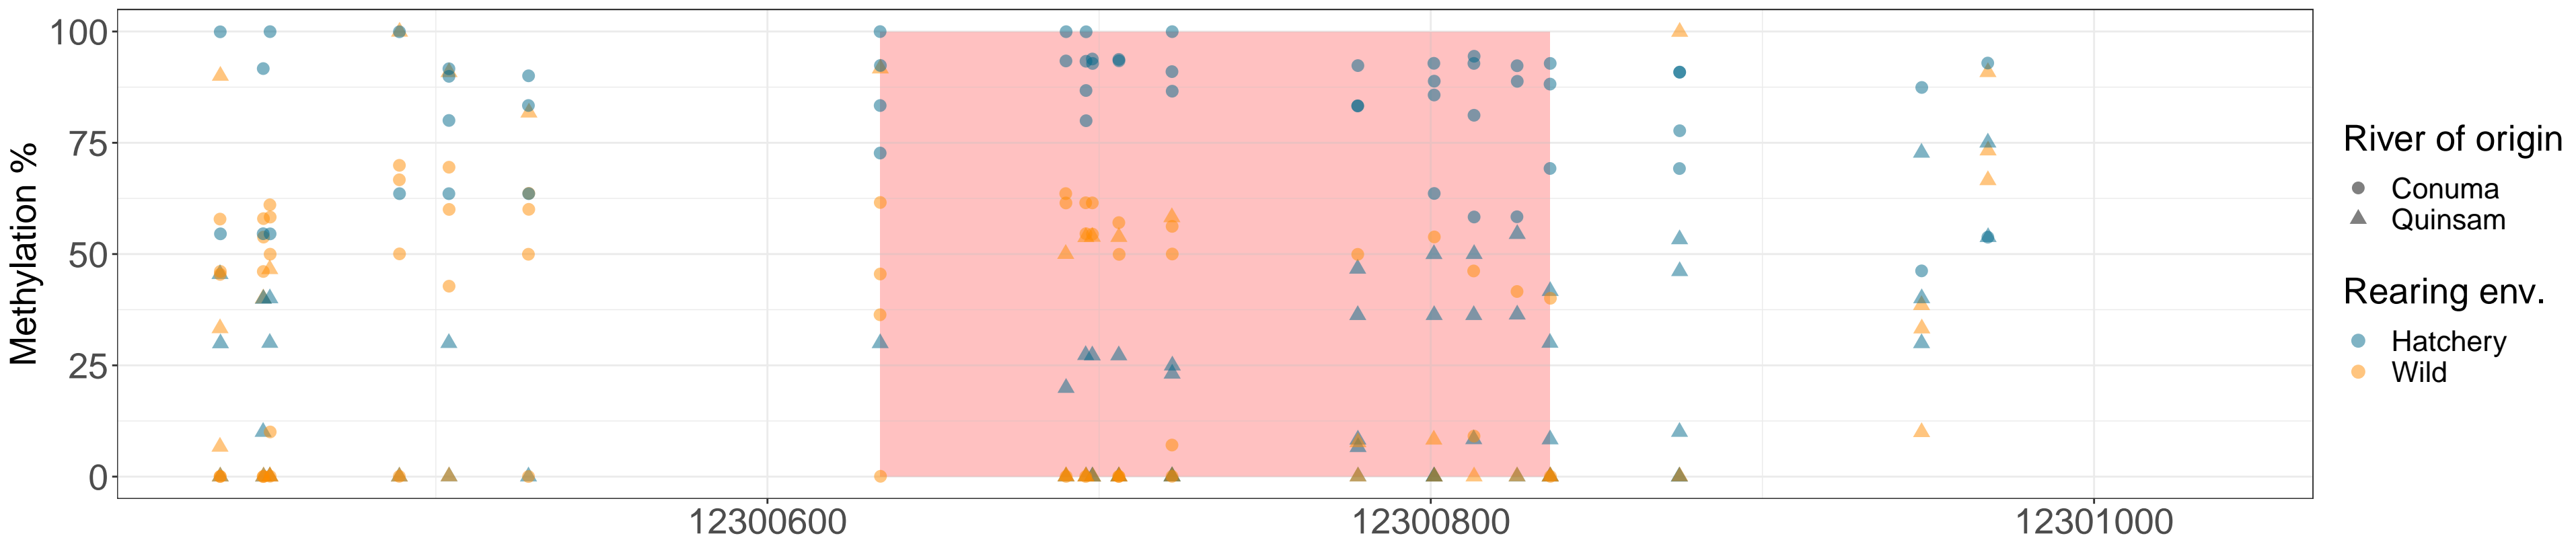**B**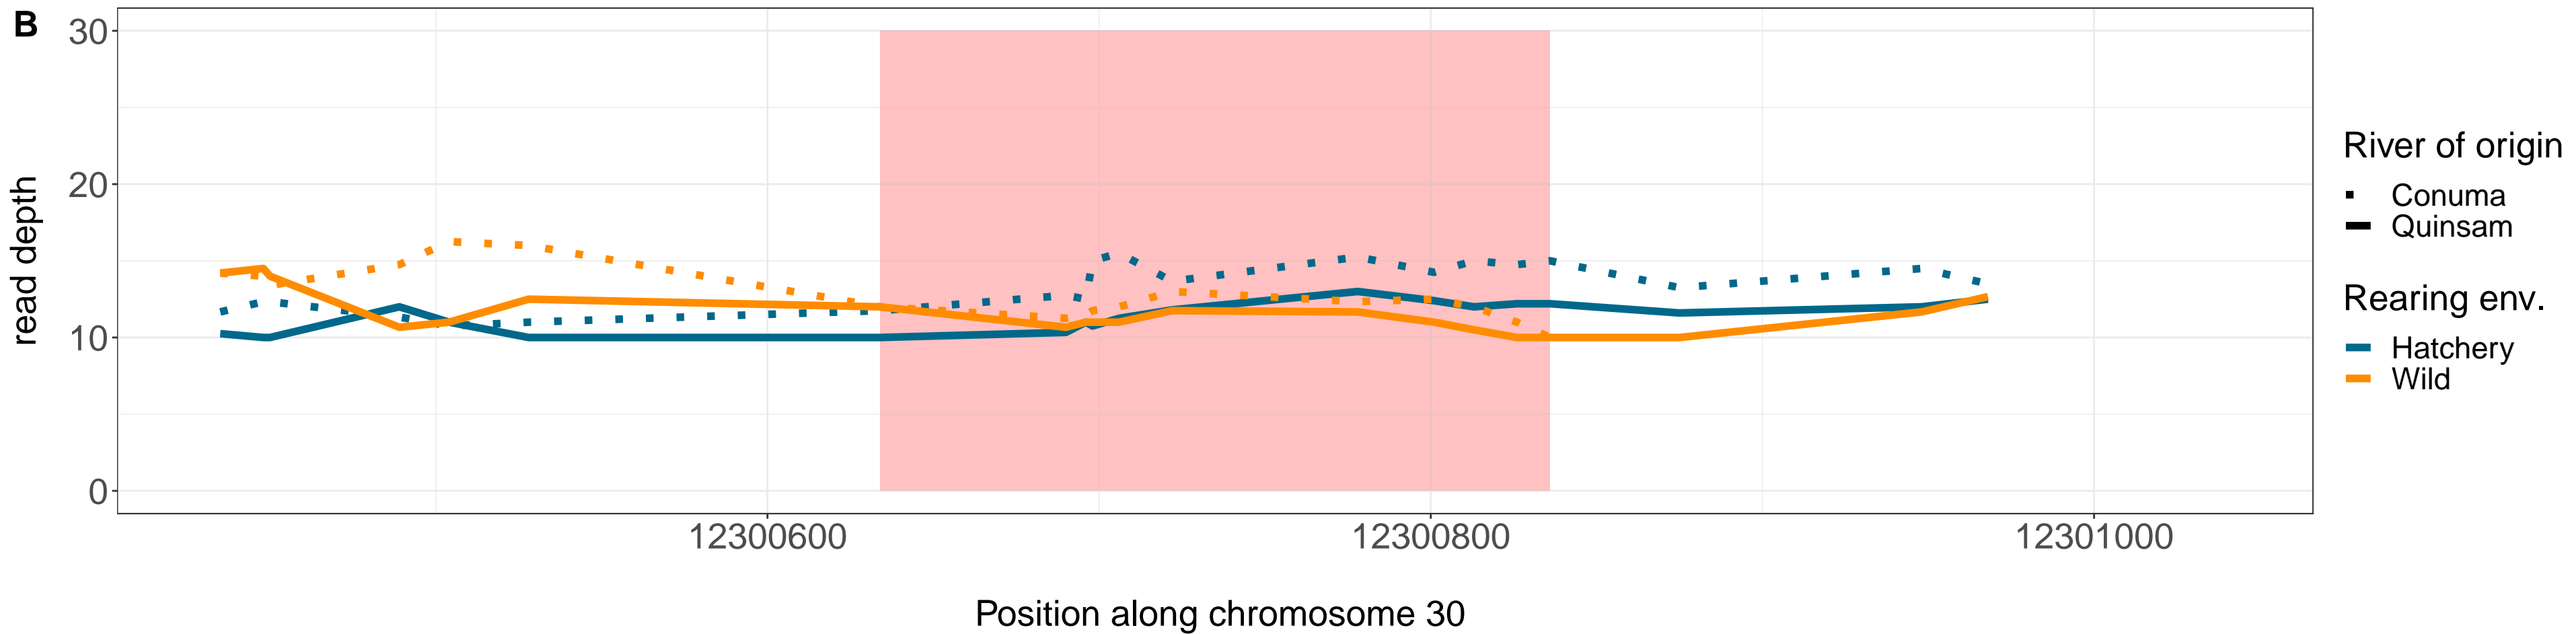

**A**

## DMR\_137

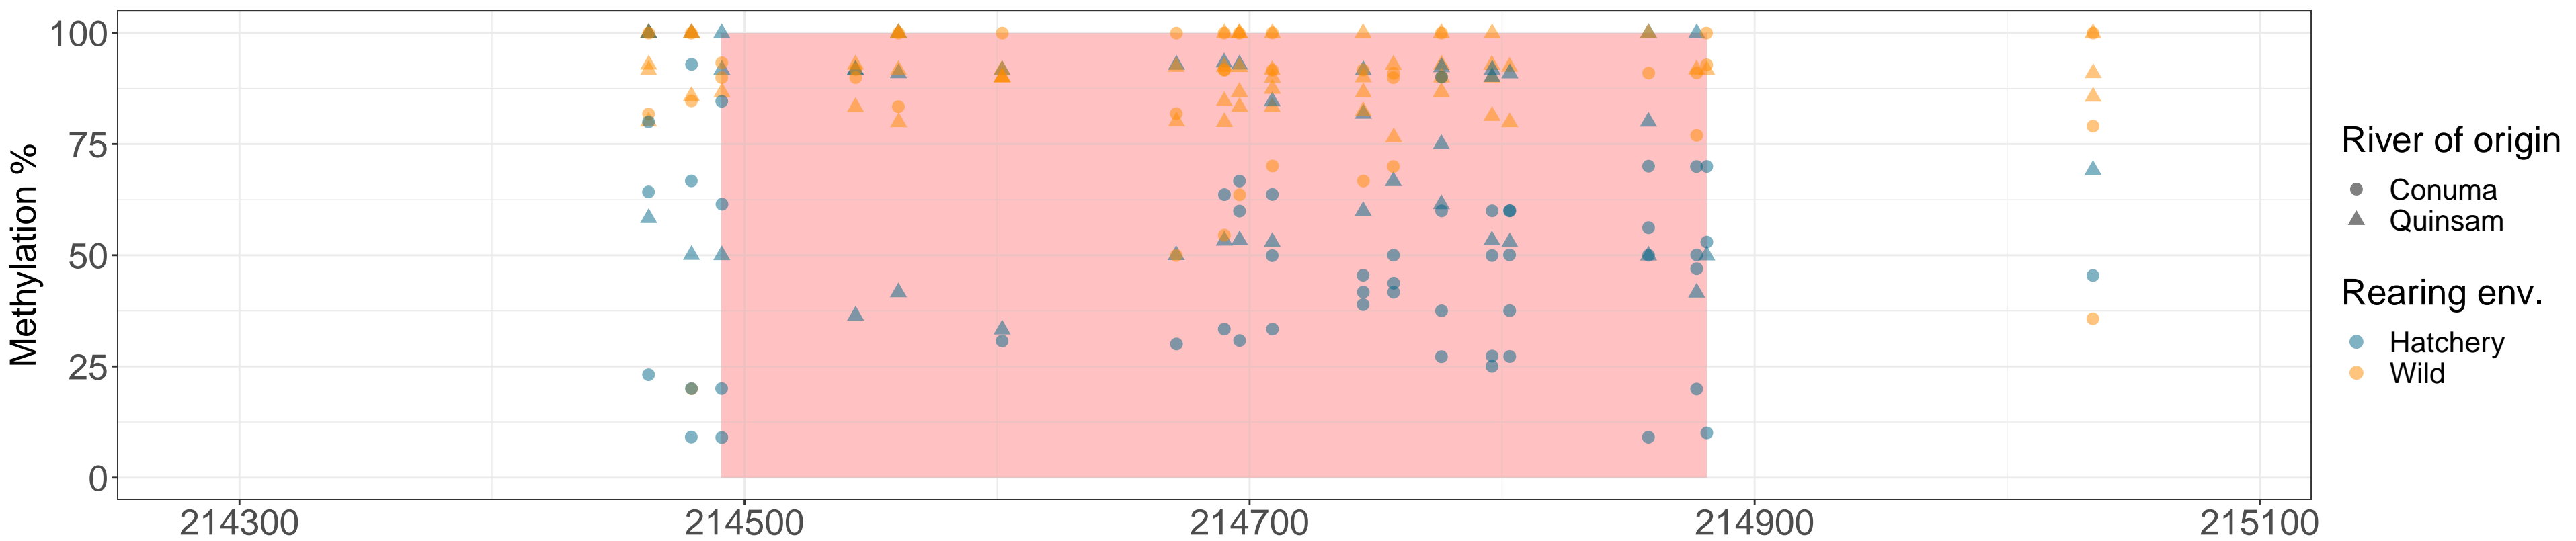**B**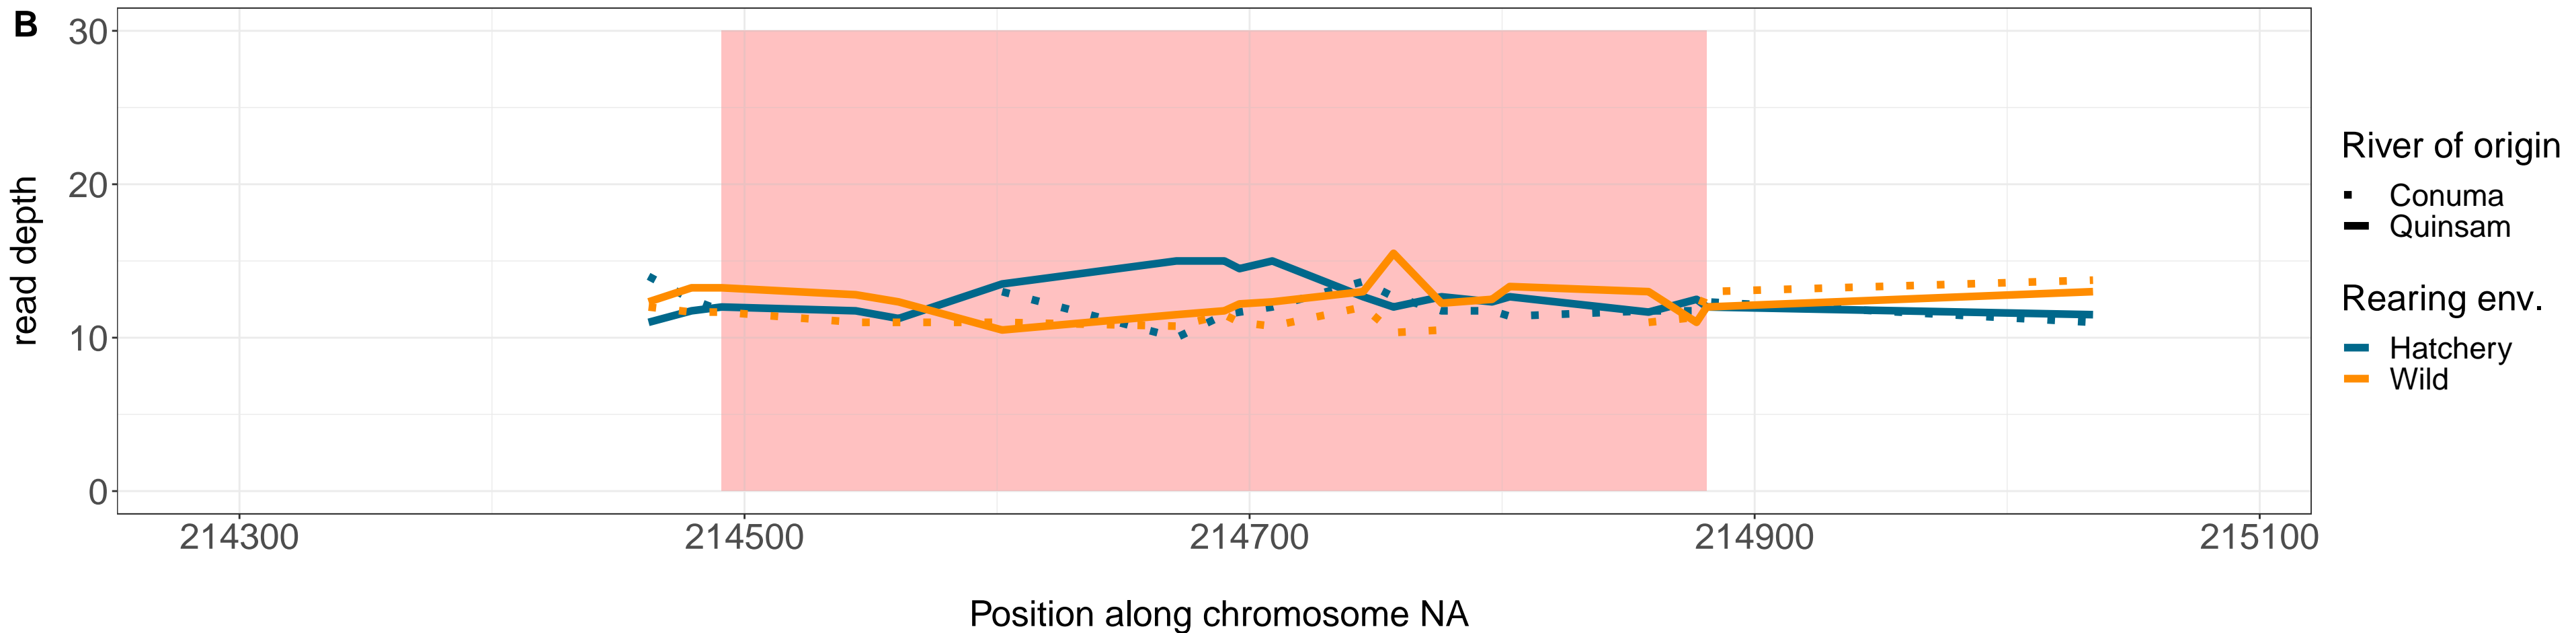

**A**

## DMR\_139

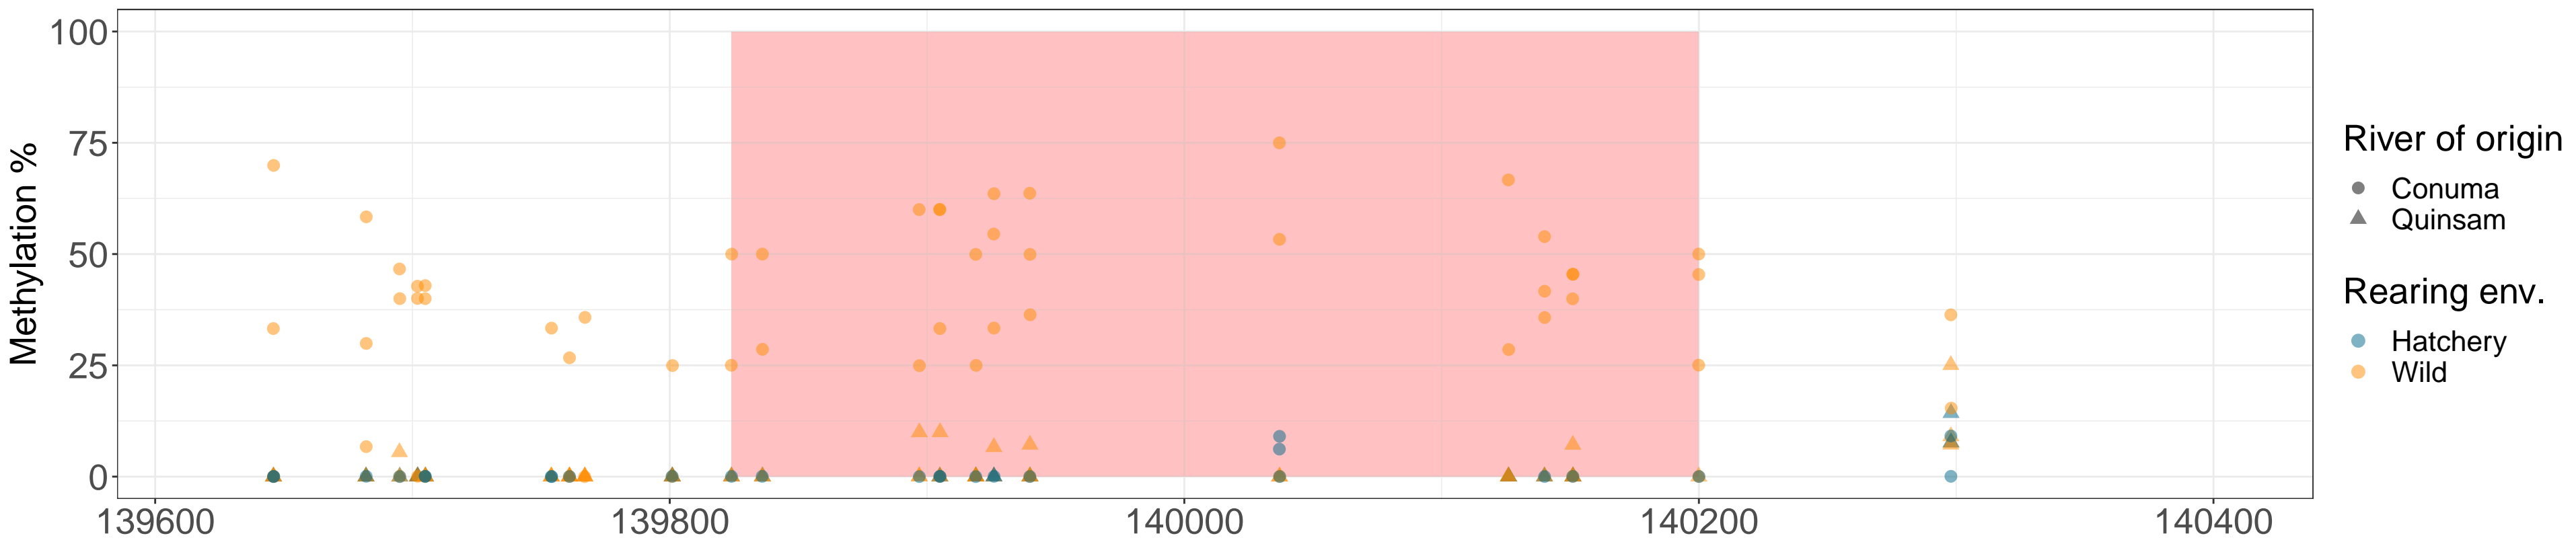**B**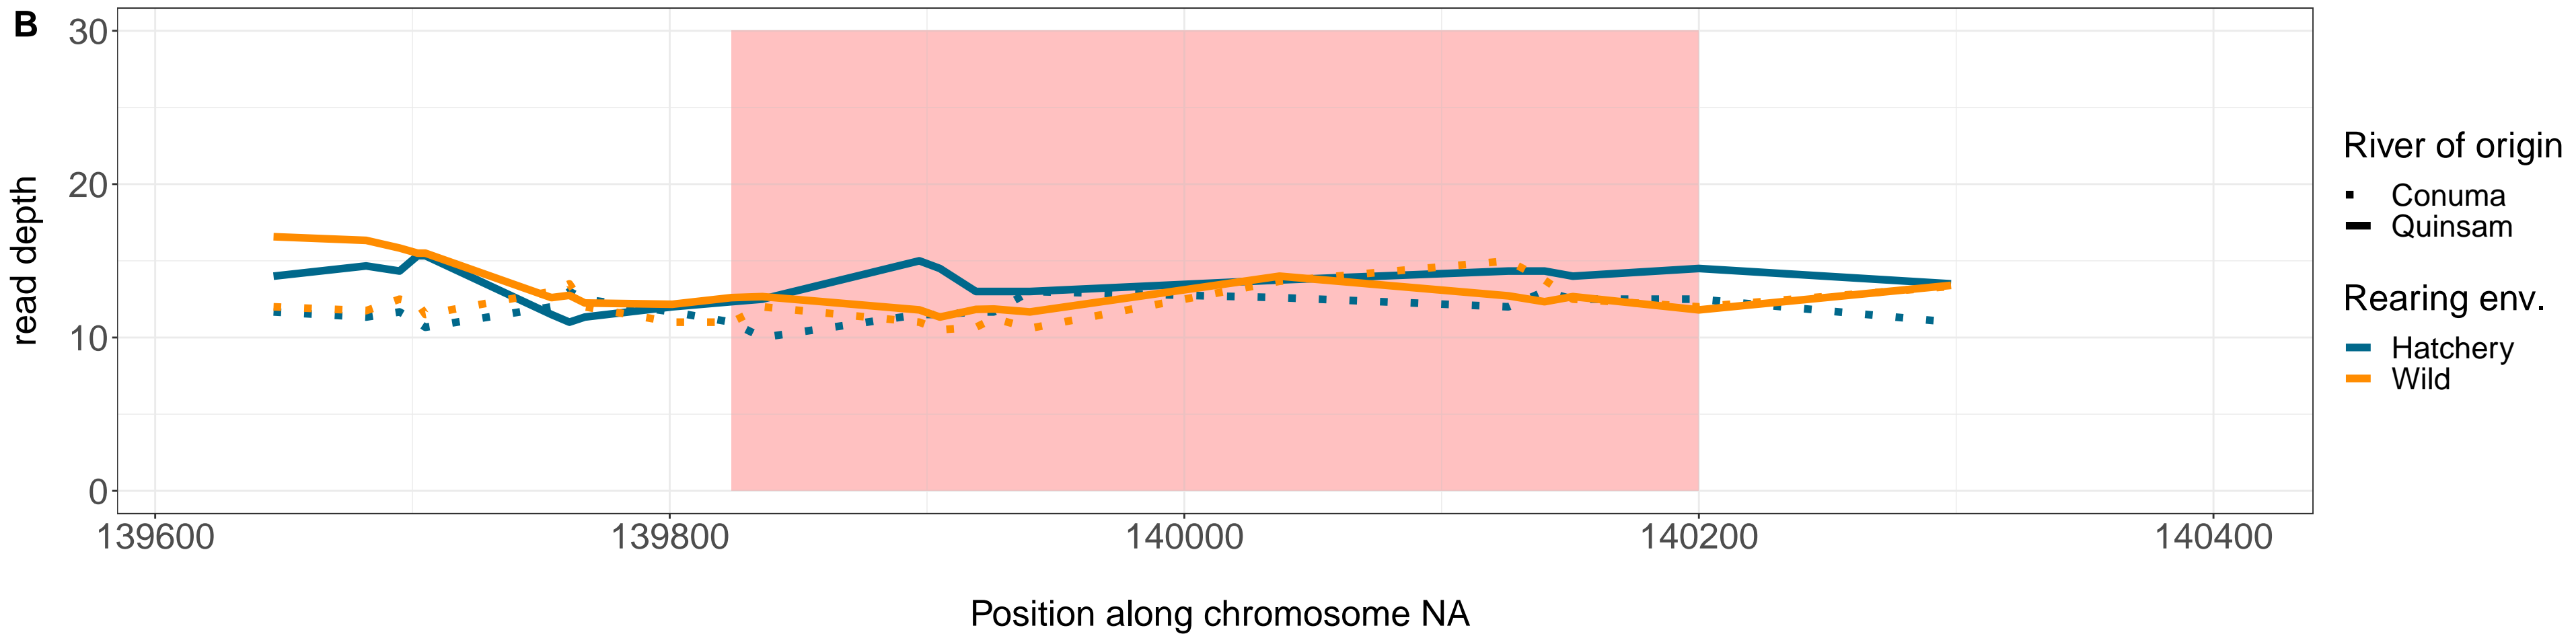

**A**

## DMR\_140

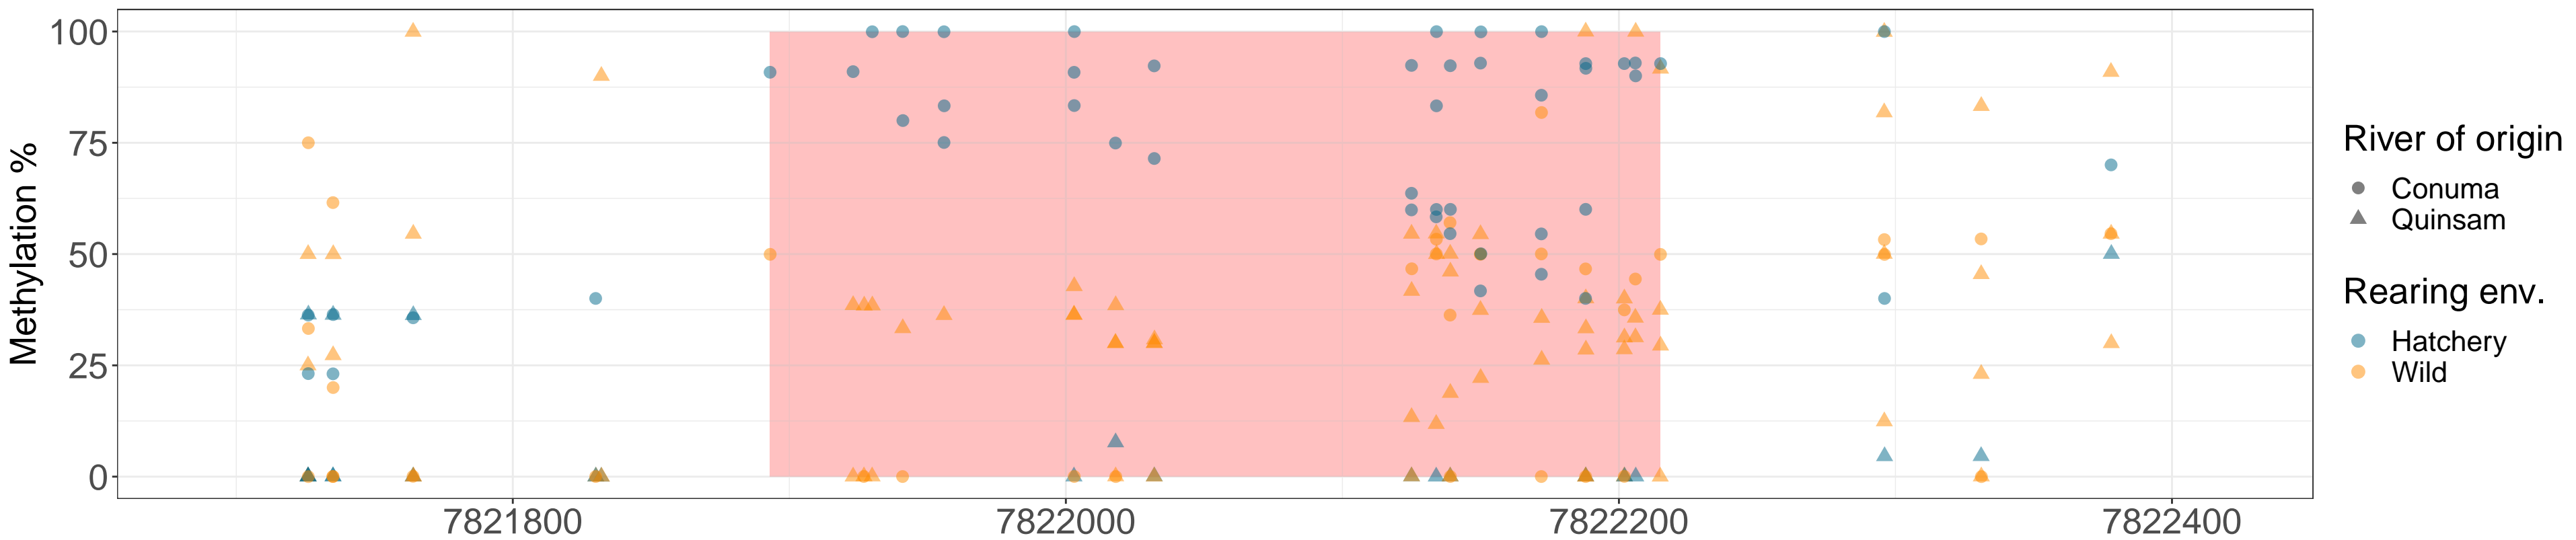**B**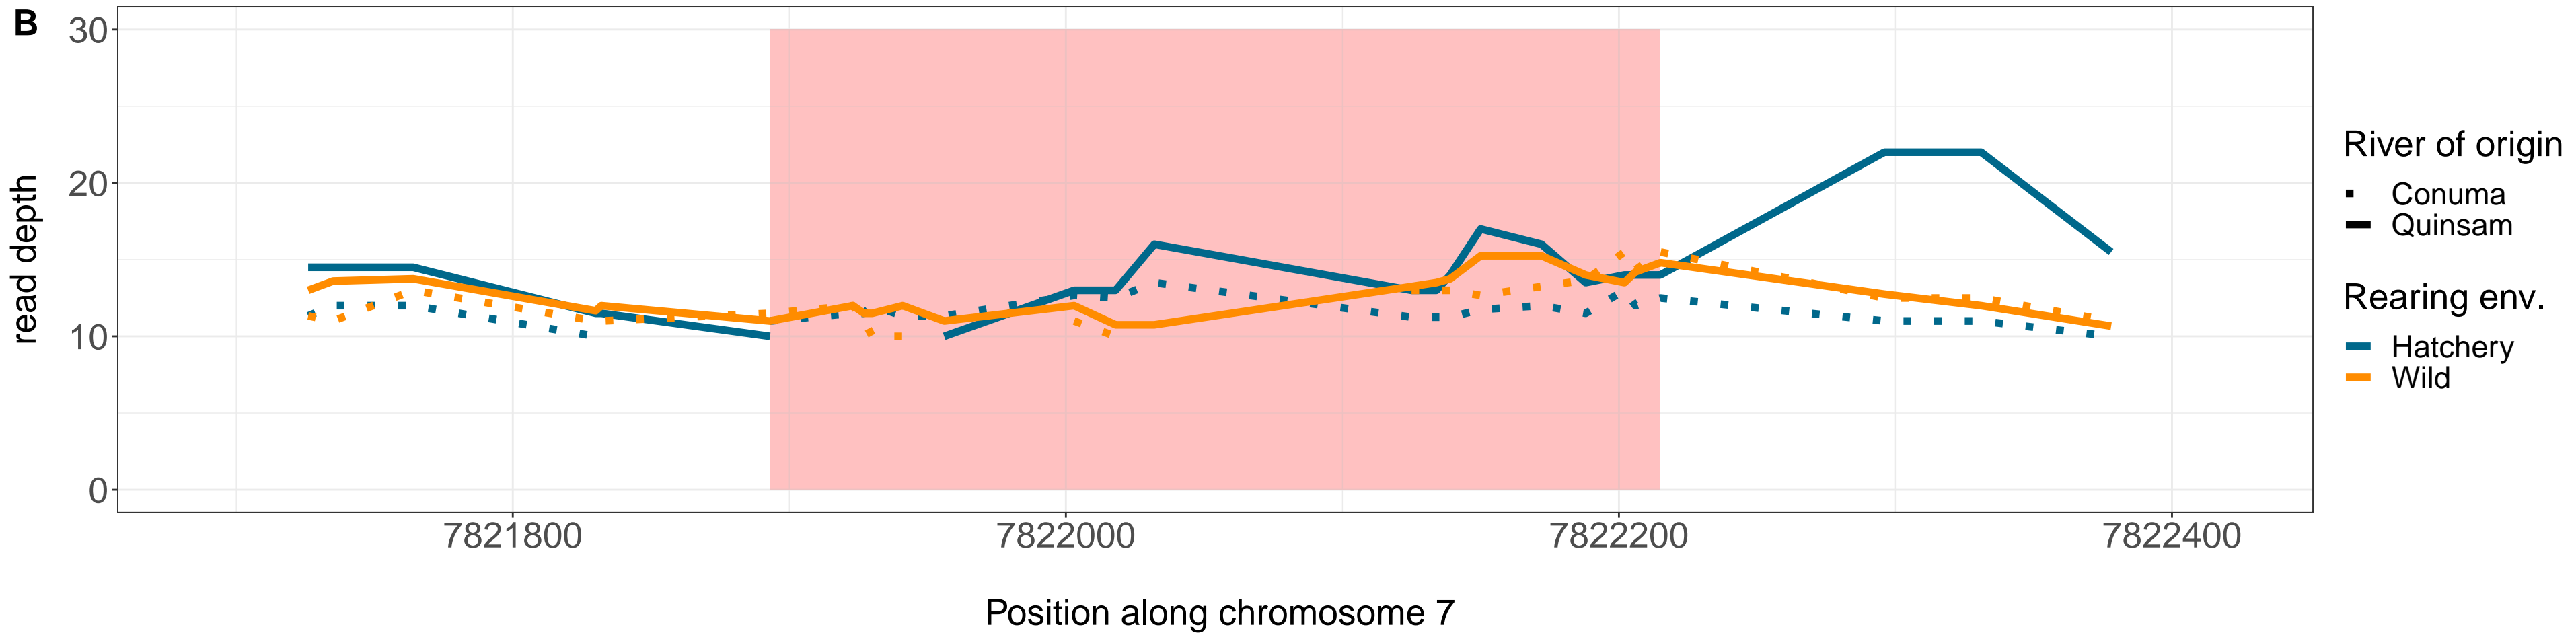



**A**

## DMR\_141

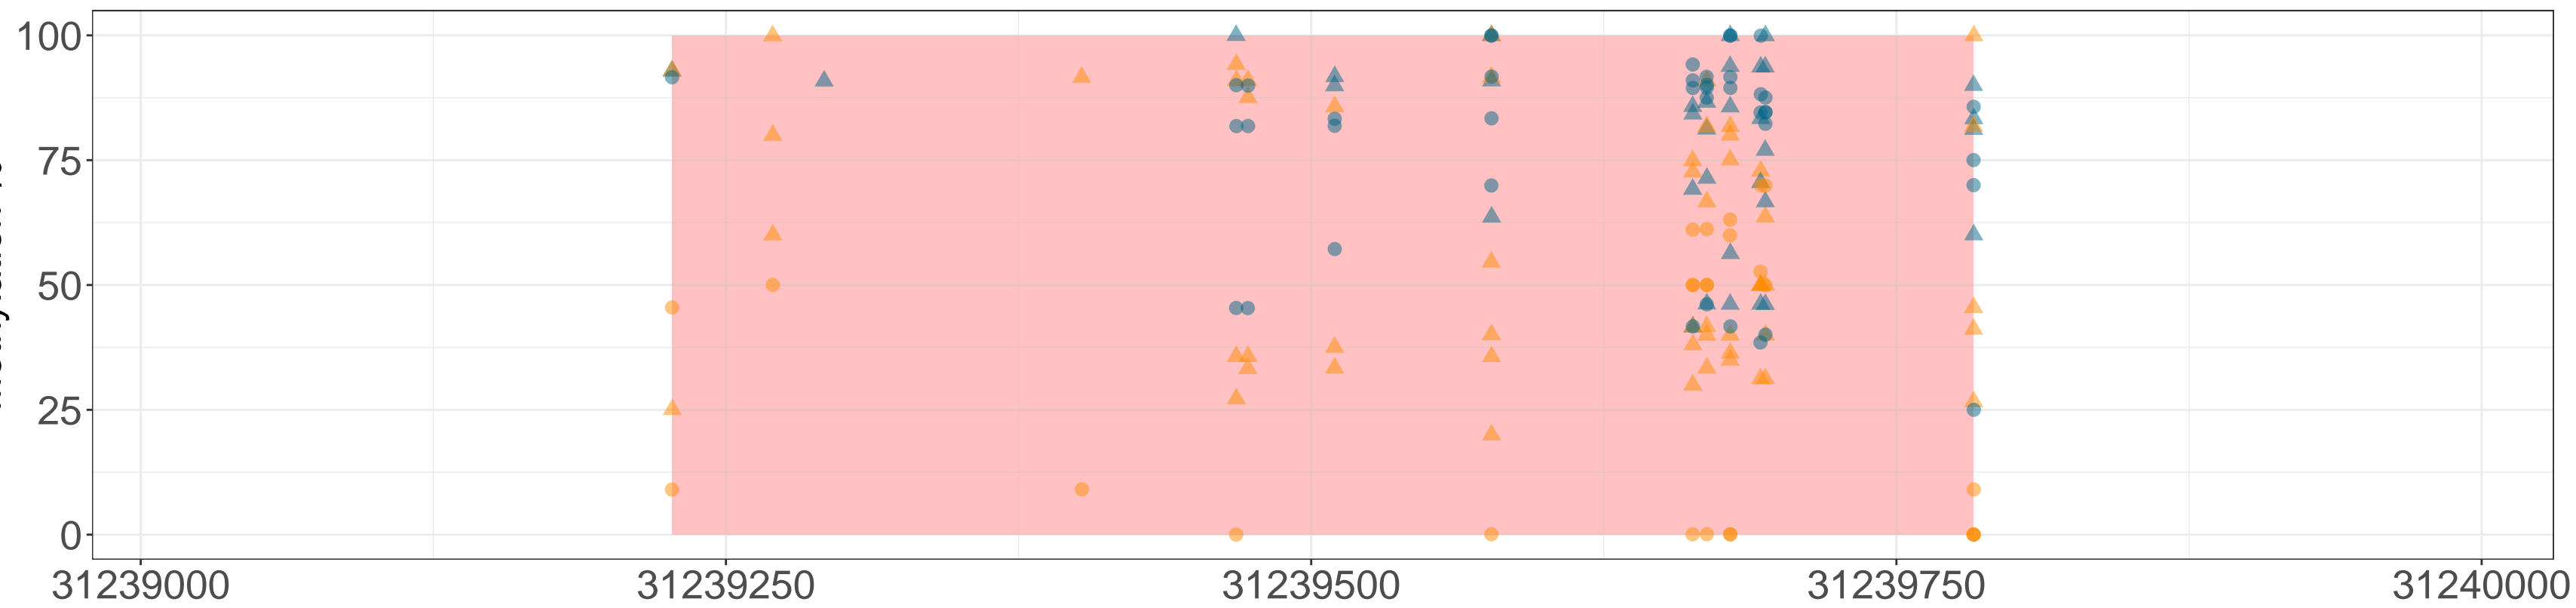**B**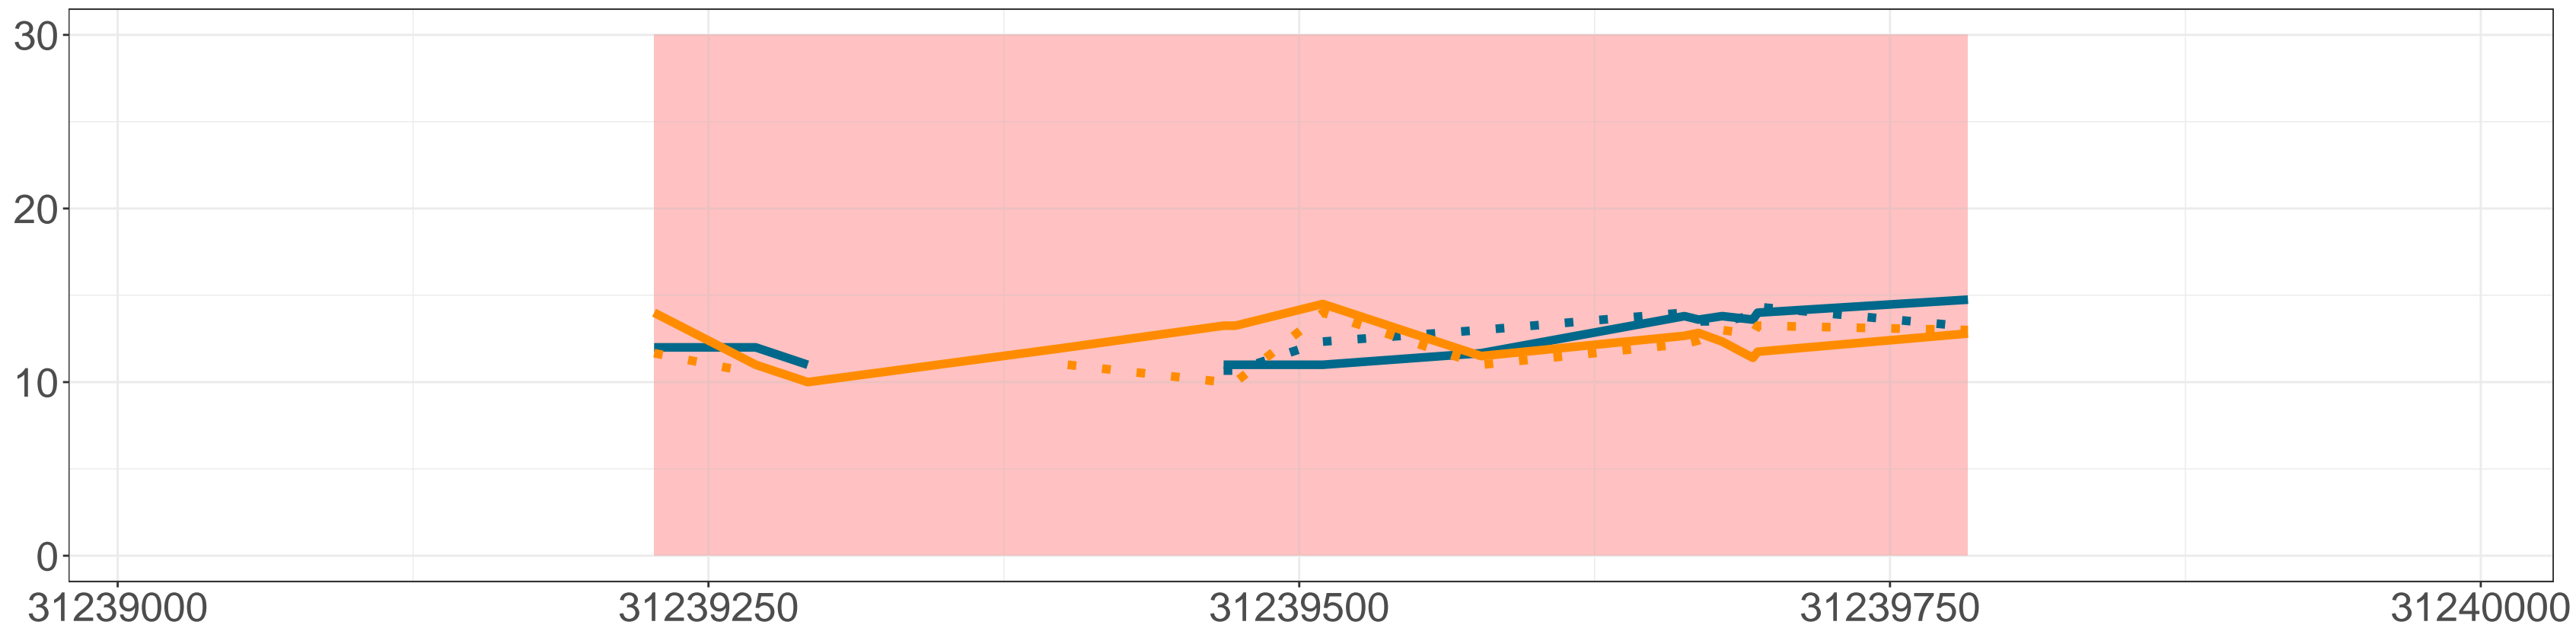

Position along chromosome 27

**A**

## DMR\_142

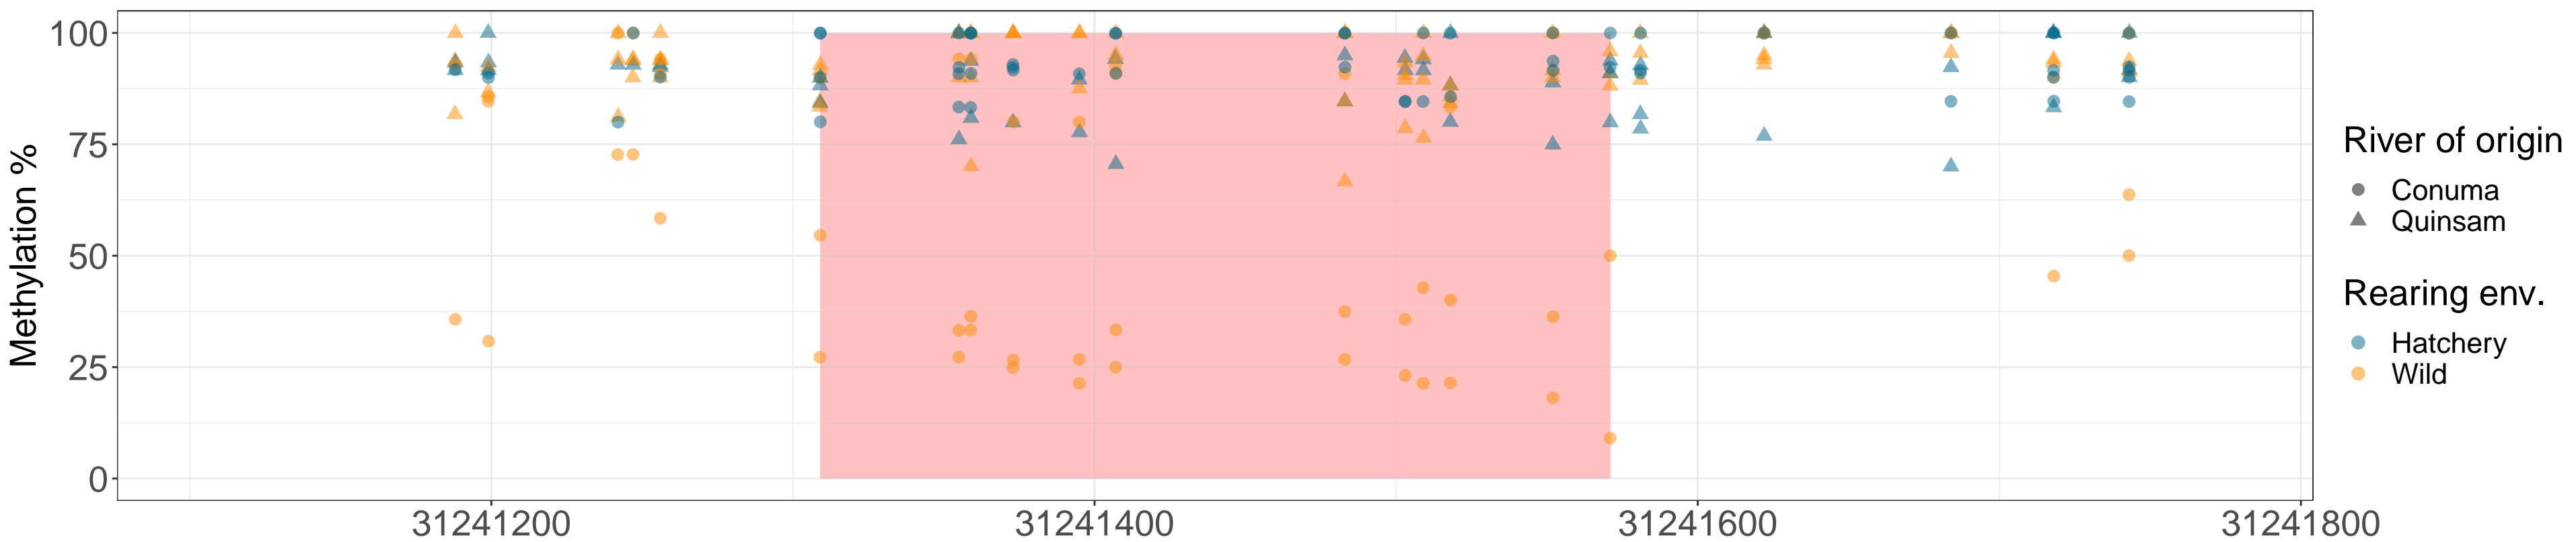**B**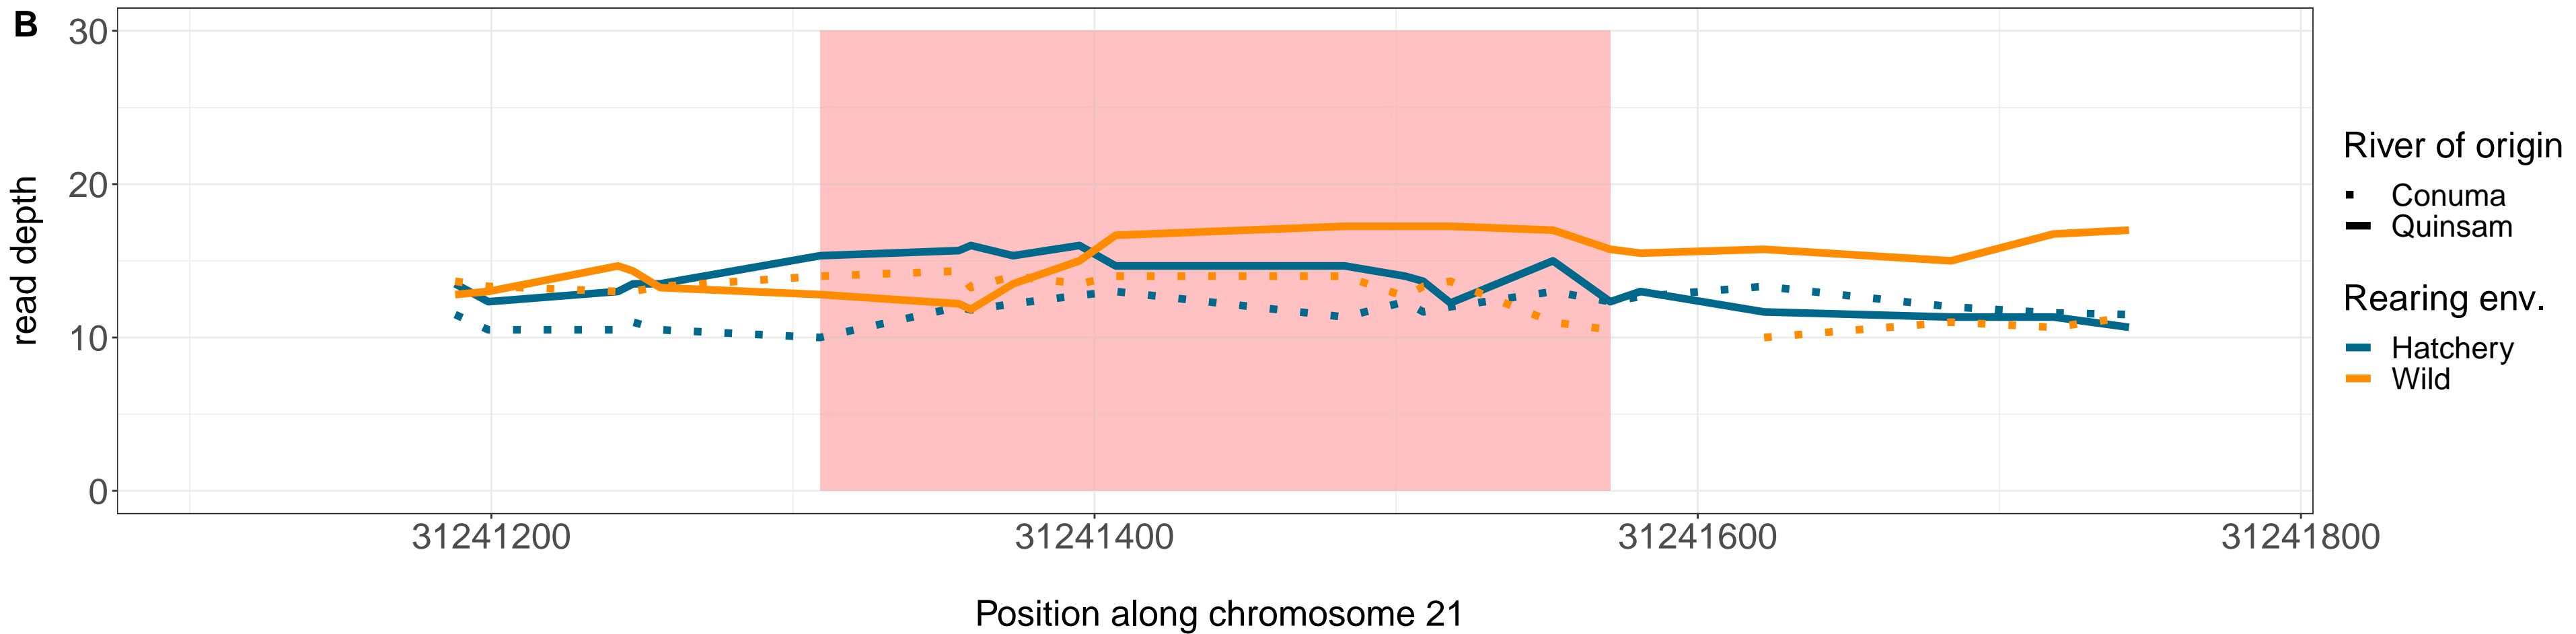

# DMR\_143

XM\_020486350.1

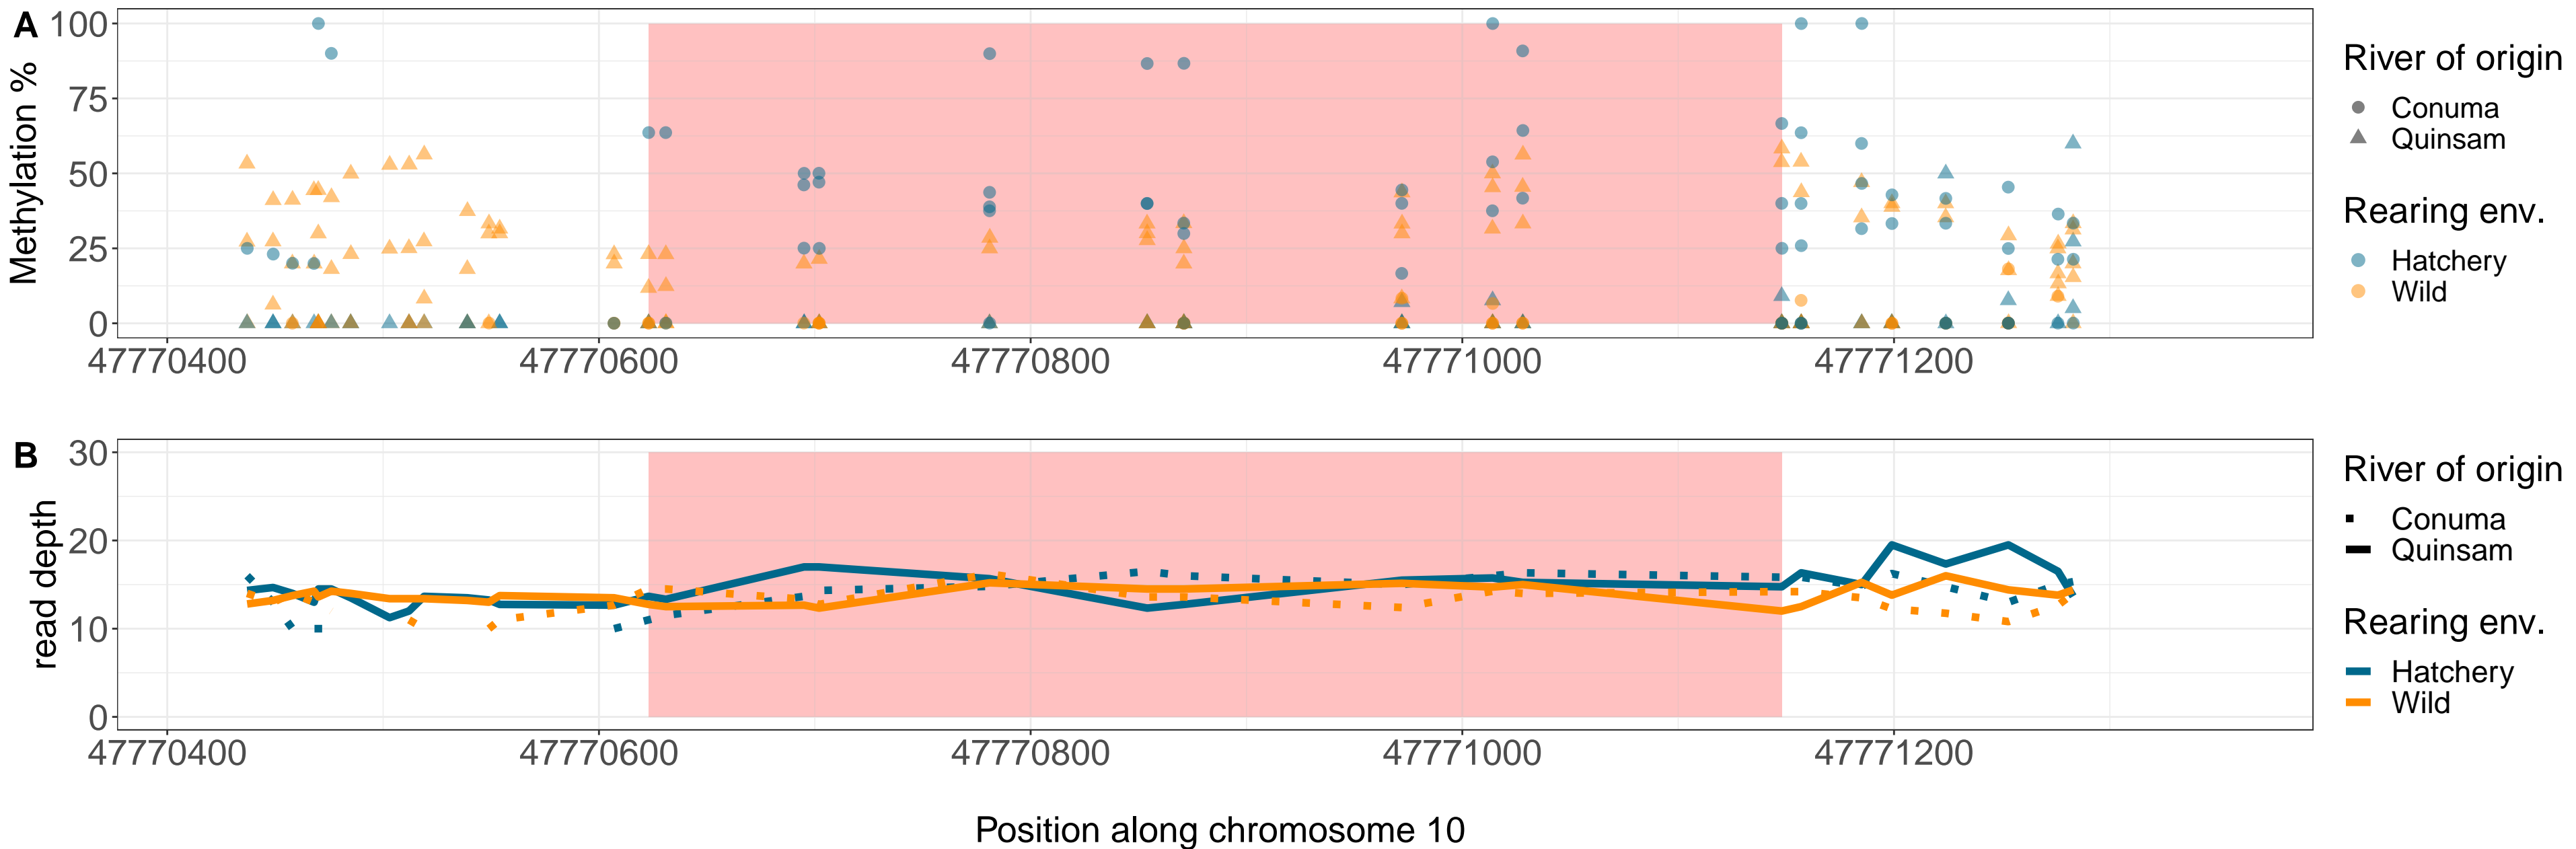

# DMR\_144

XM\_020455822.1

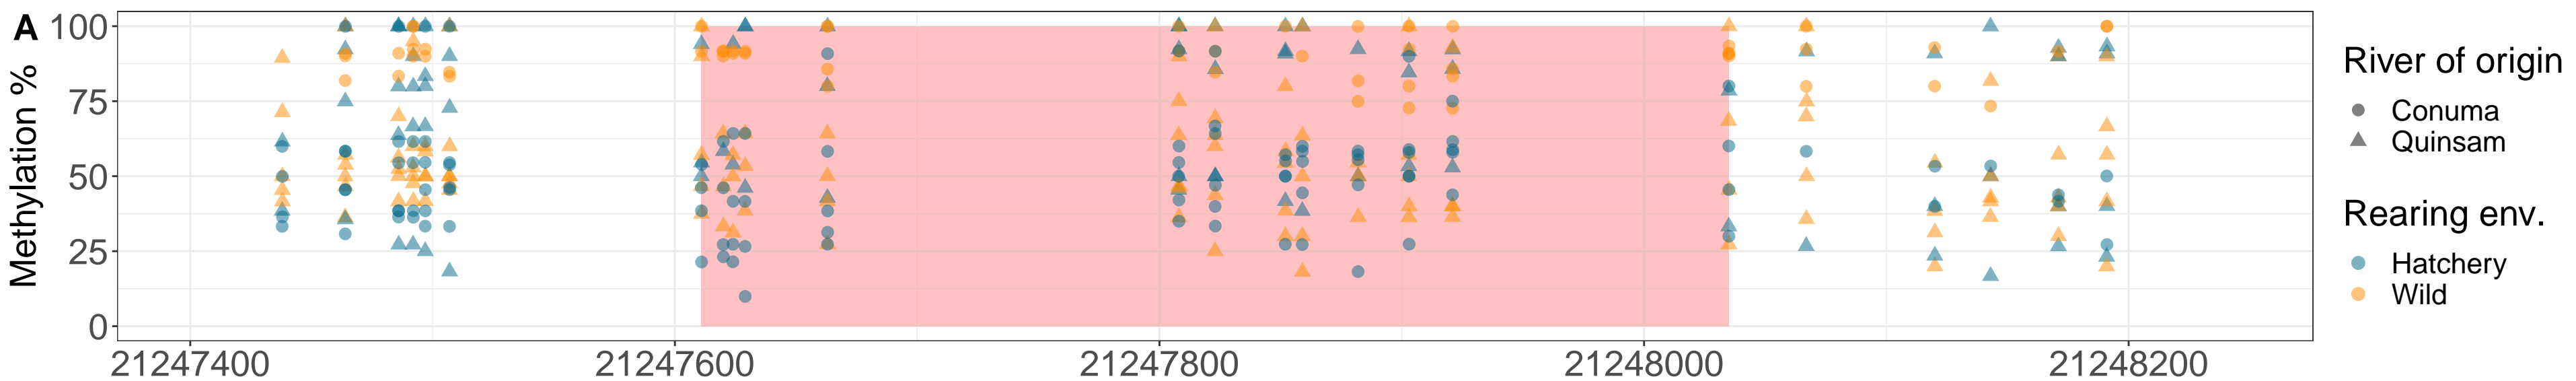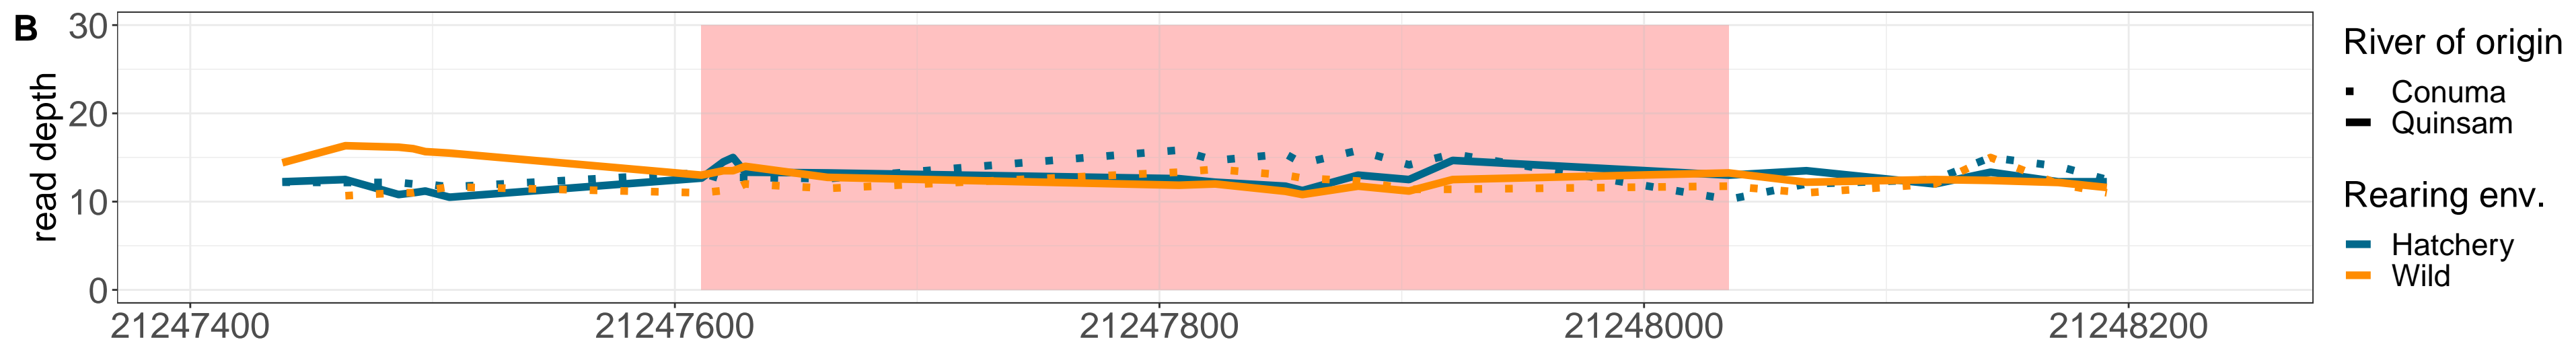

Position along chromosome 22

# DMR\_145

XM\_020494680.1

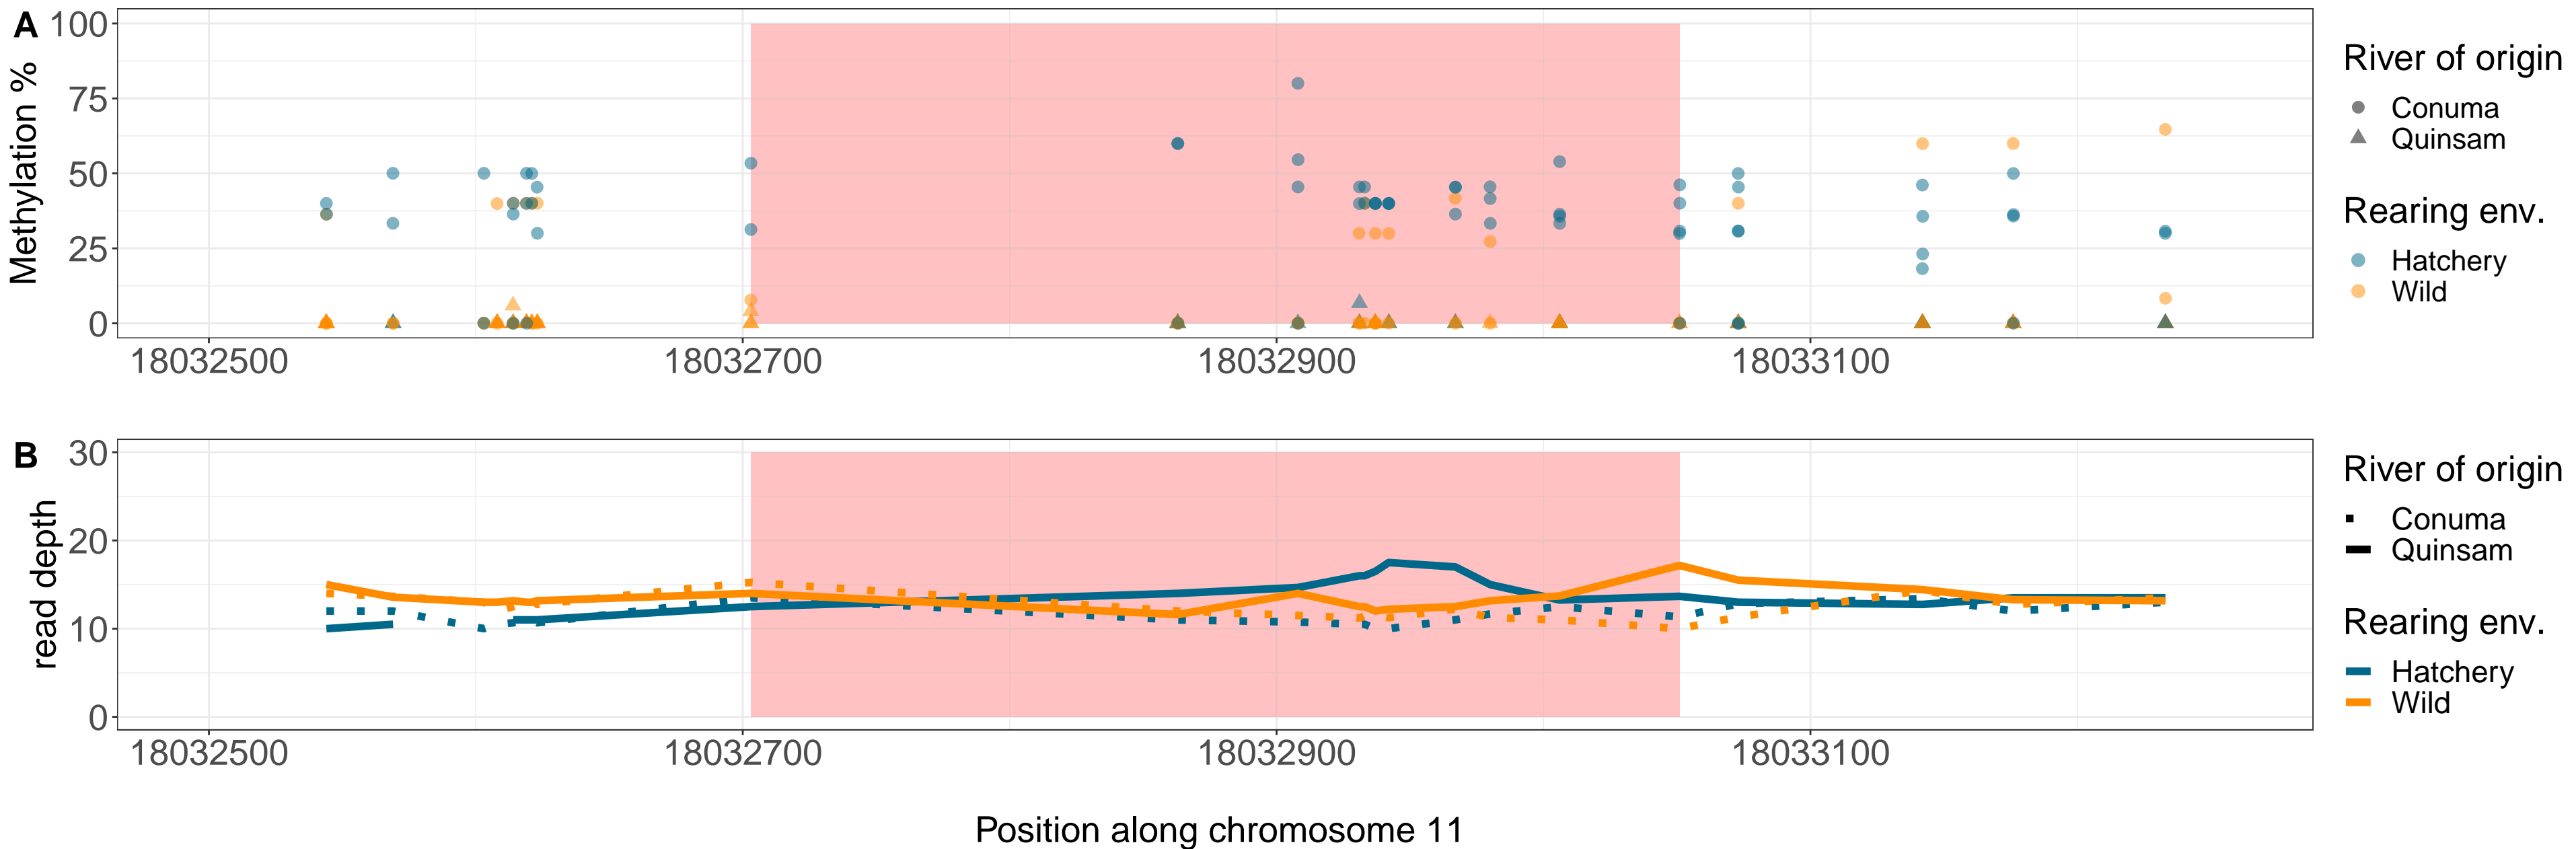



**A**

## DMR\_151

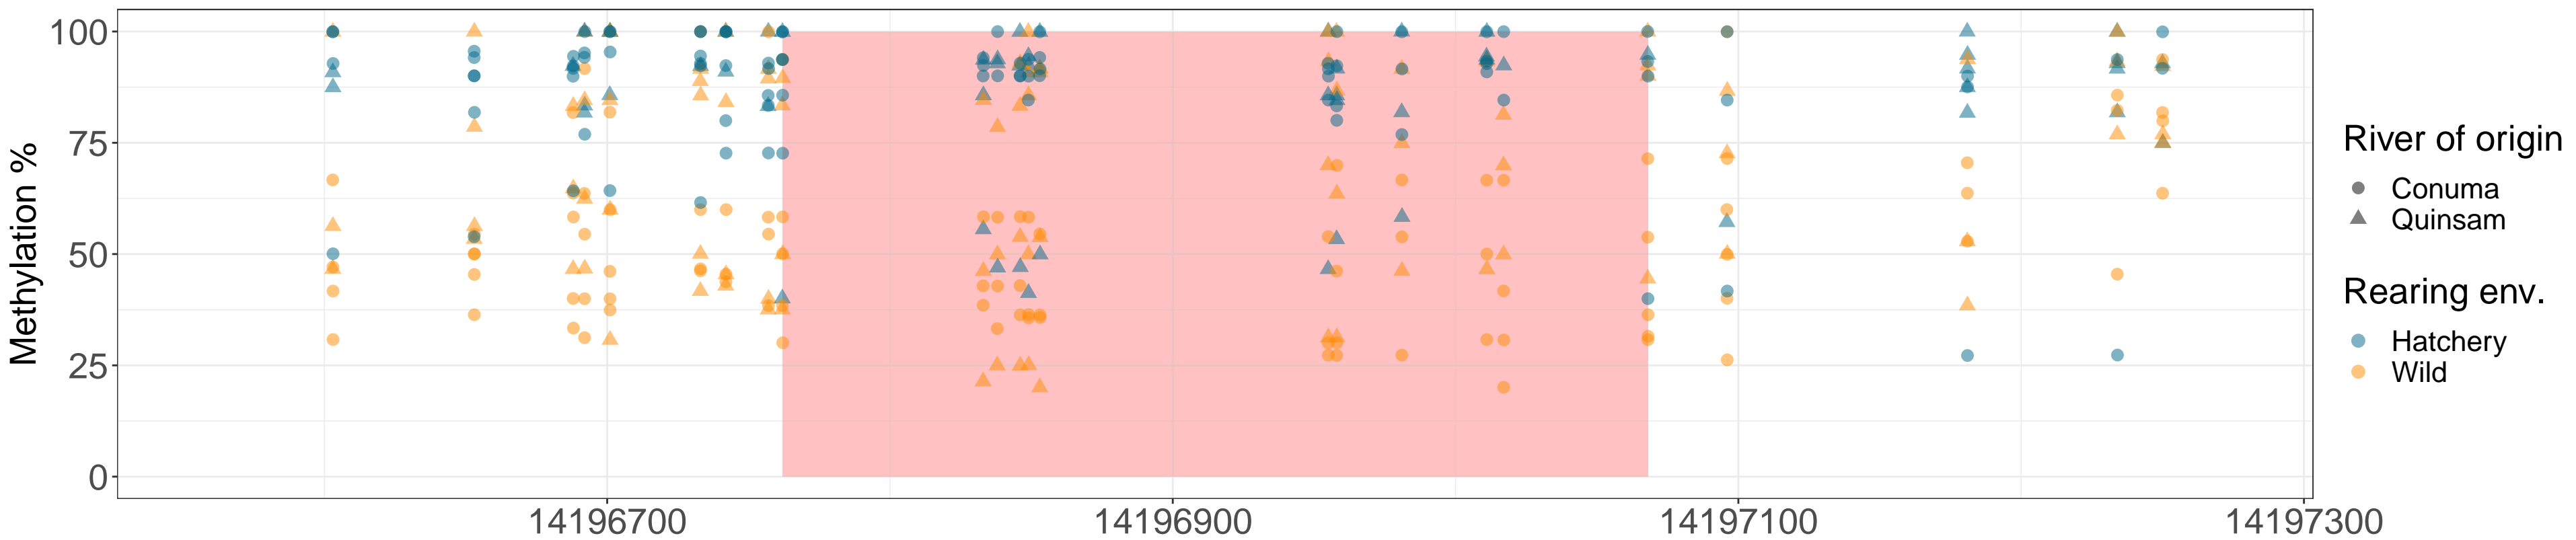**B**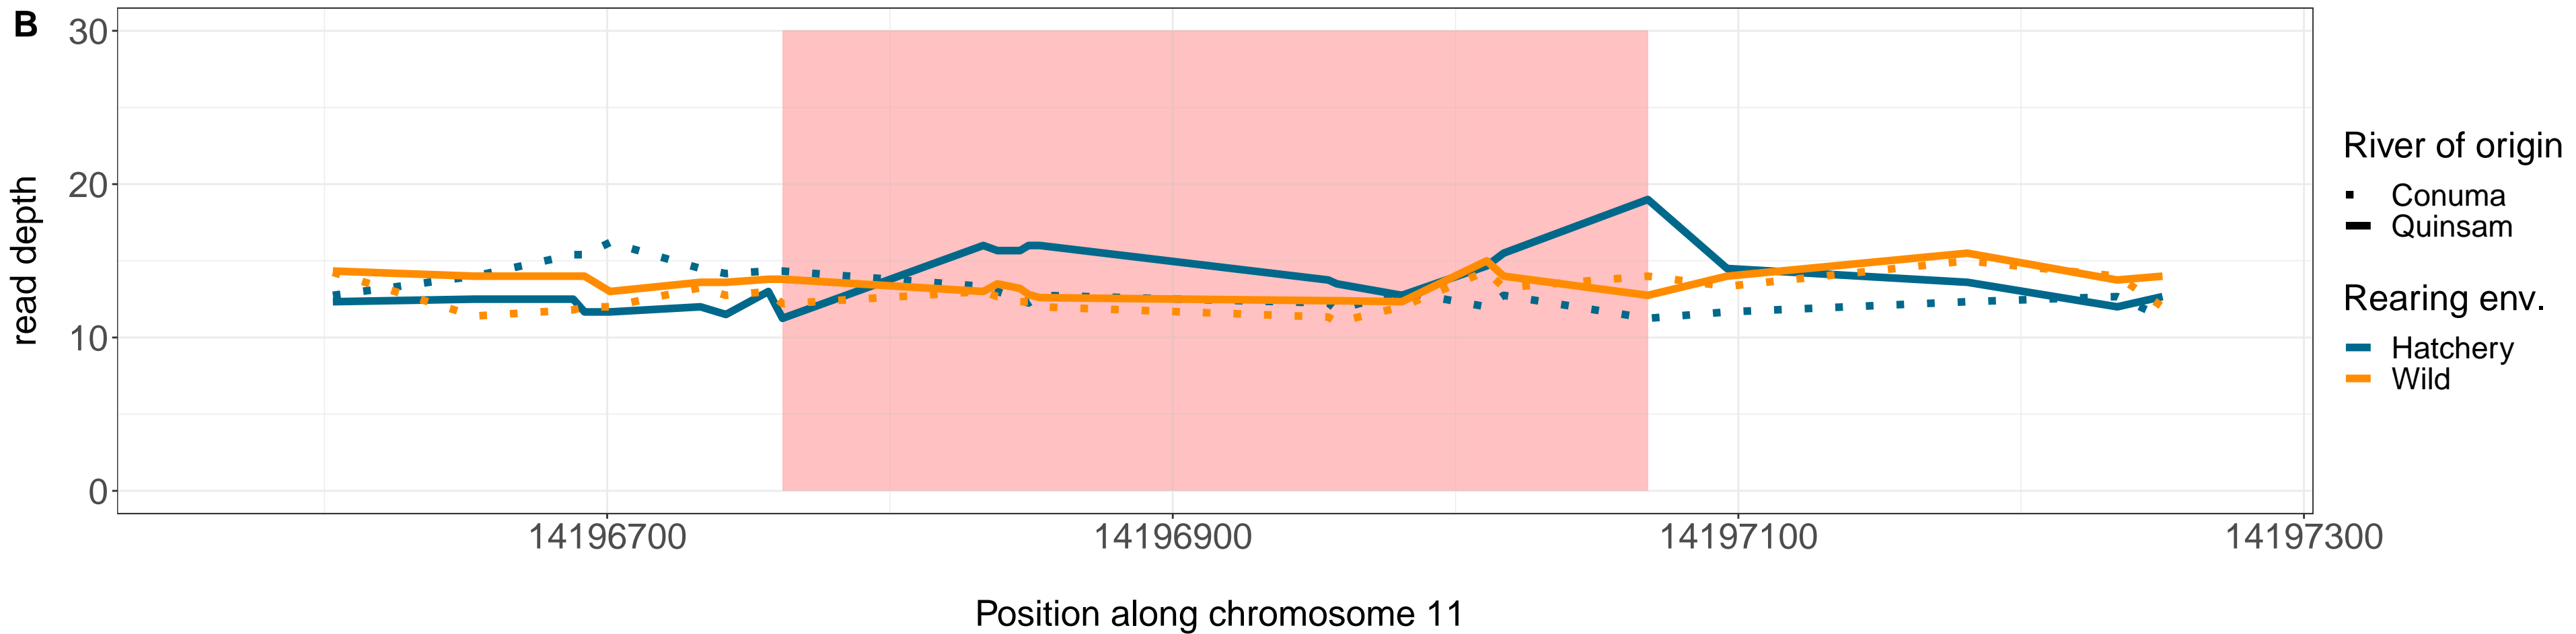

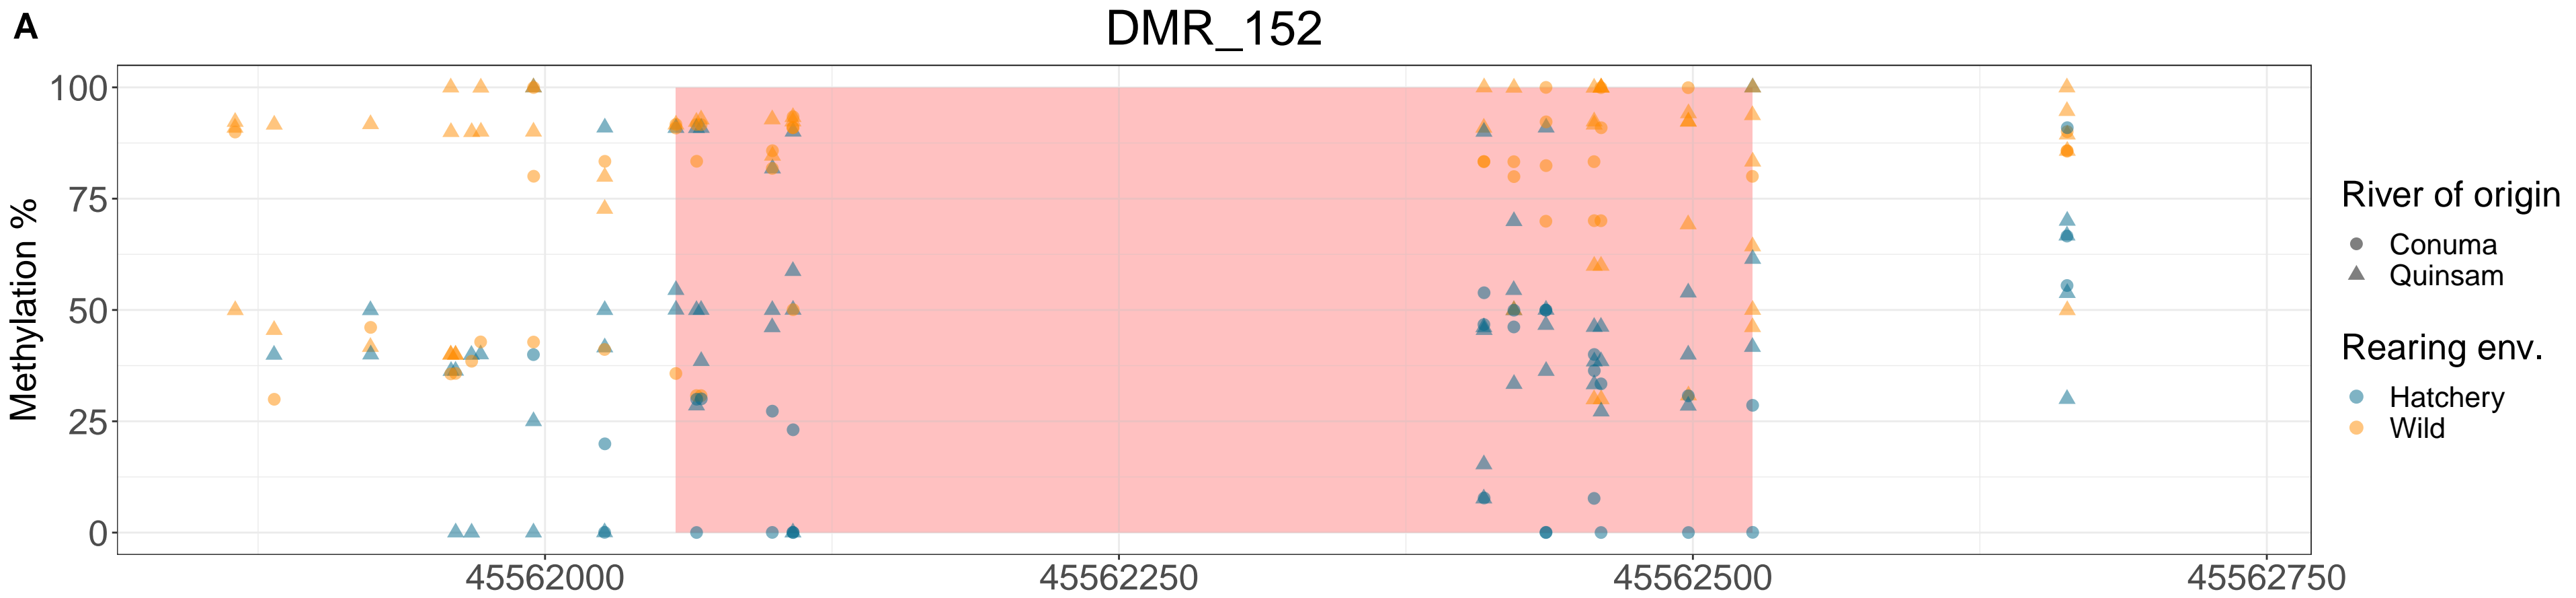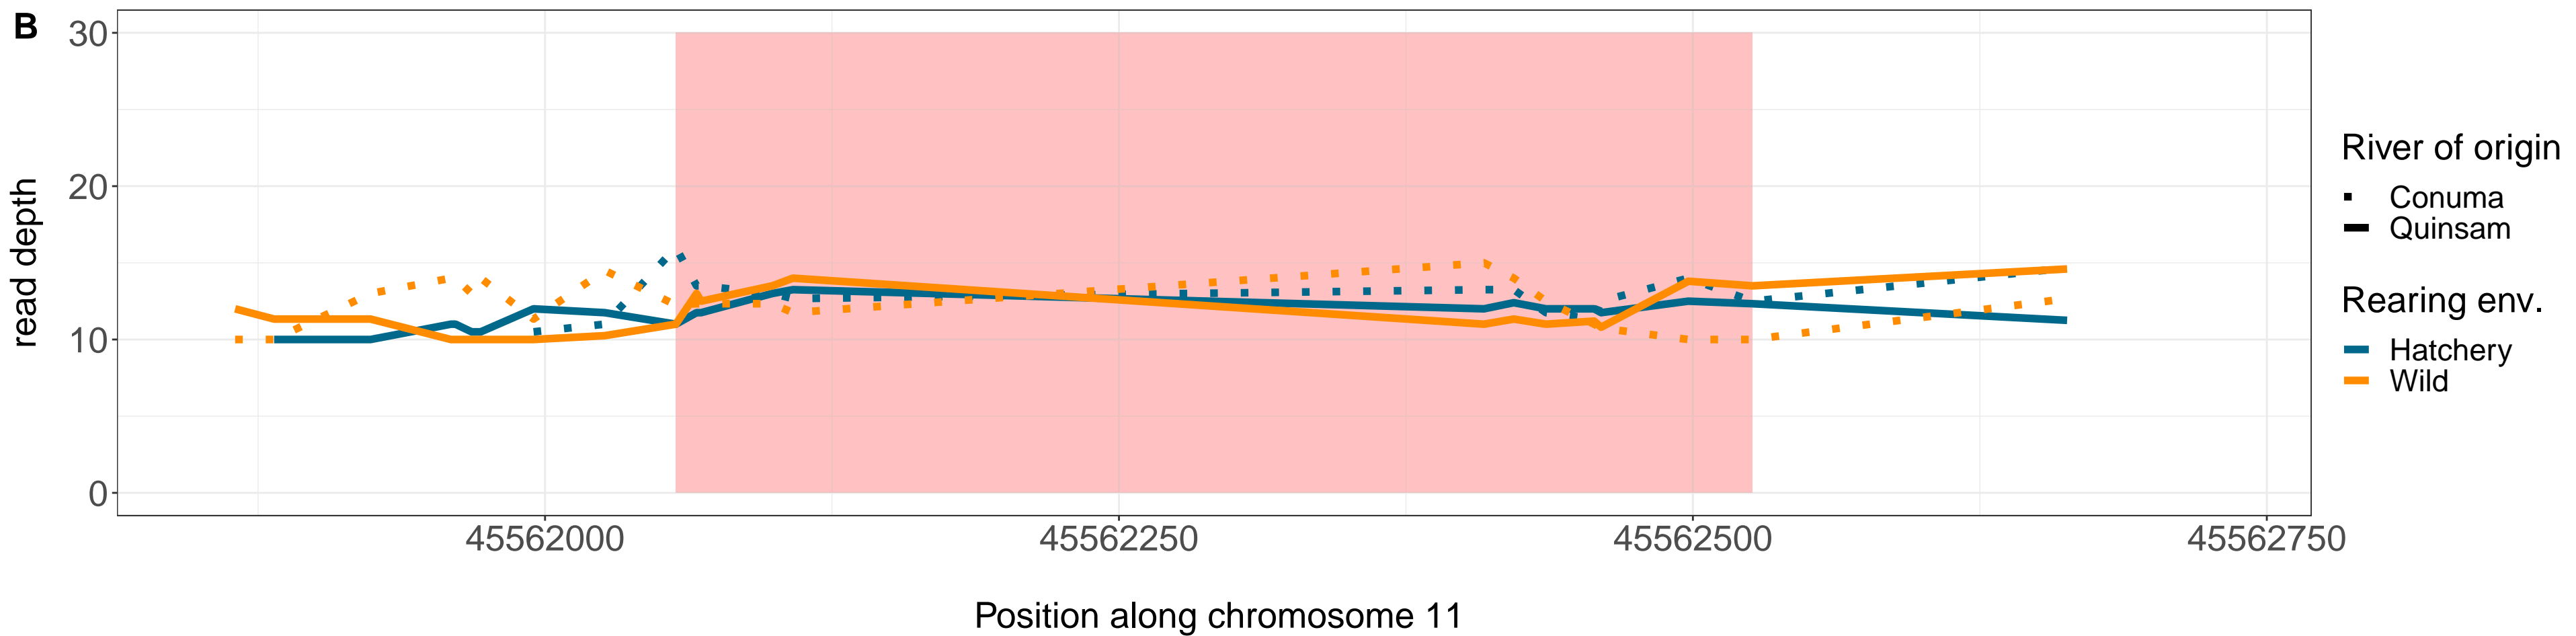



**A**

## DMR\_153

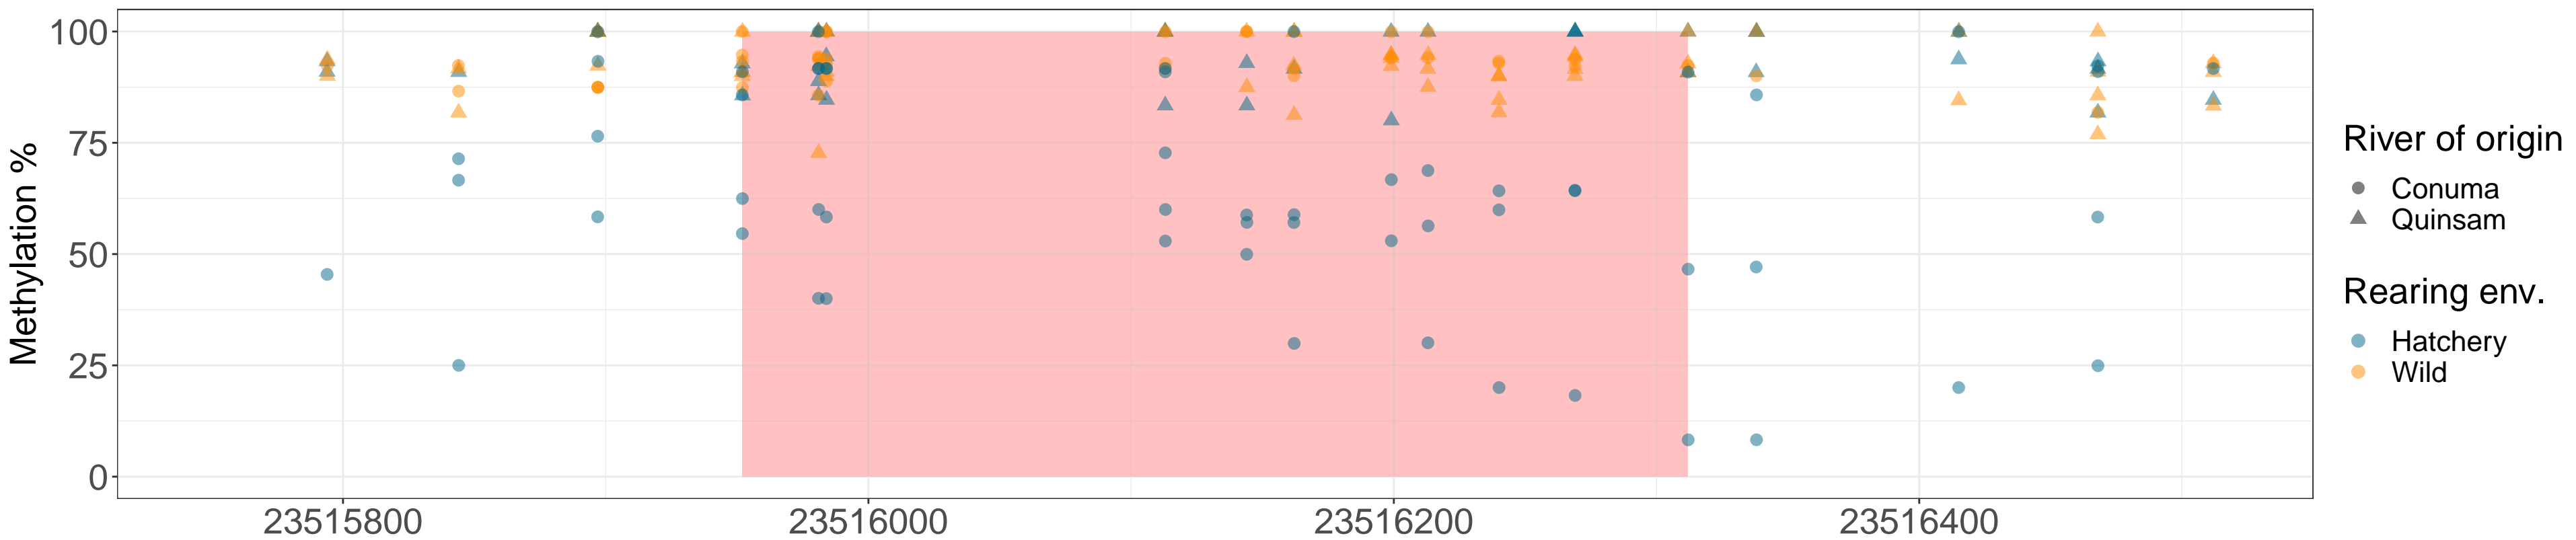**B**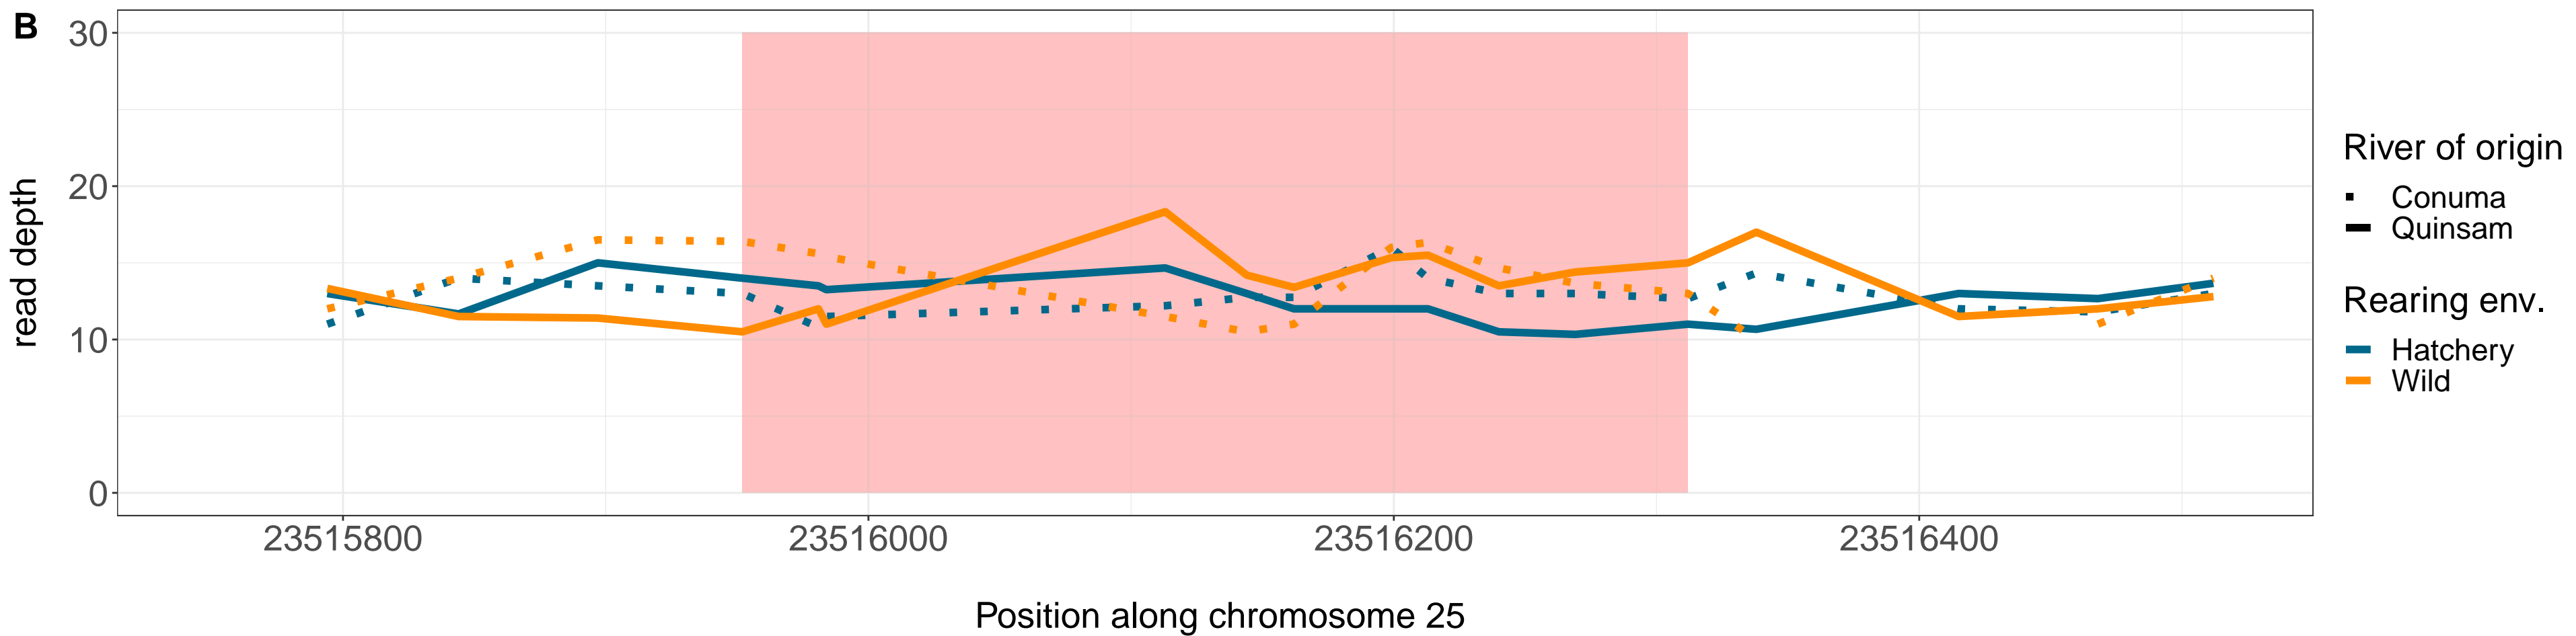

# DMR\_154

XM\_020503947.1

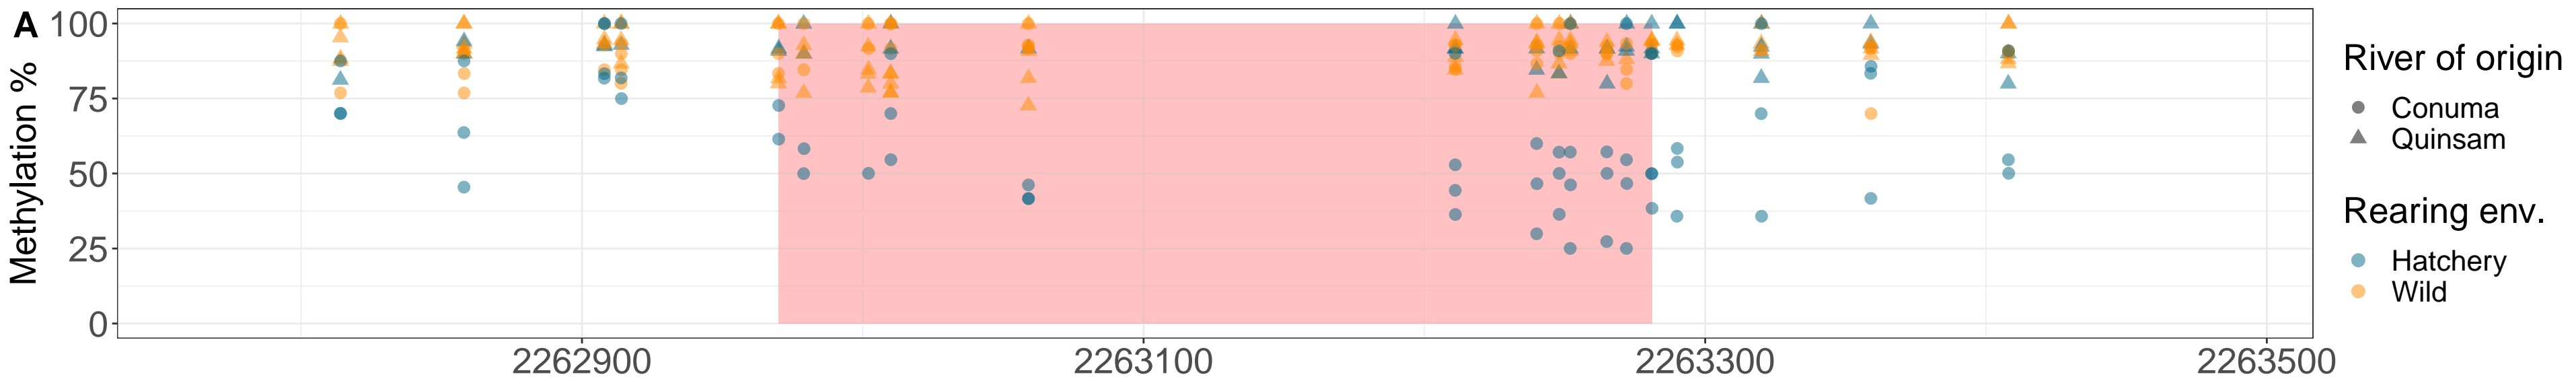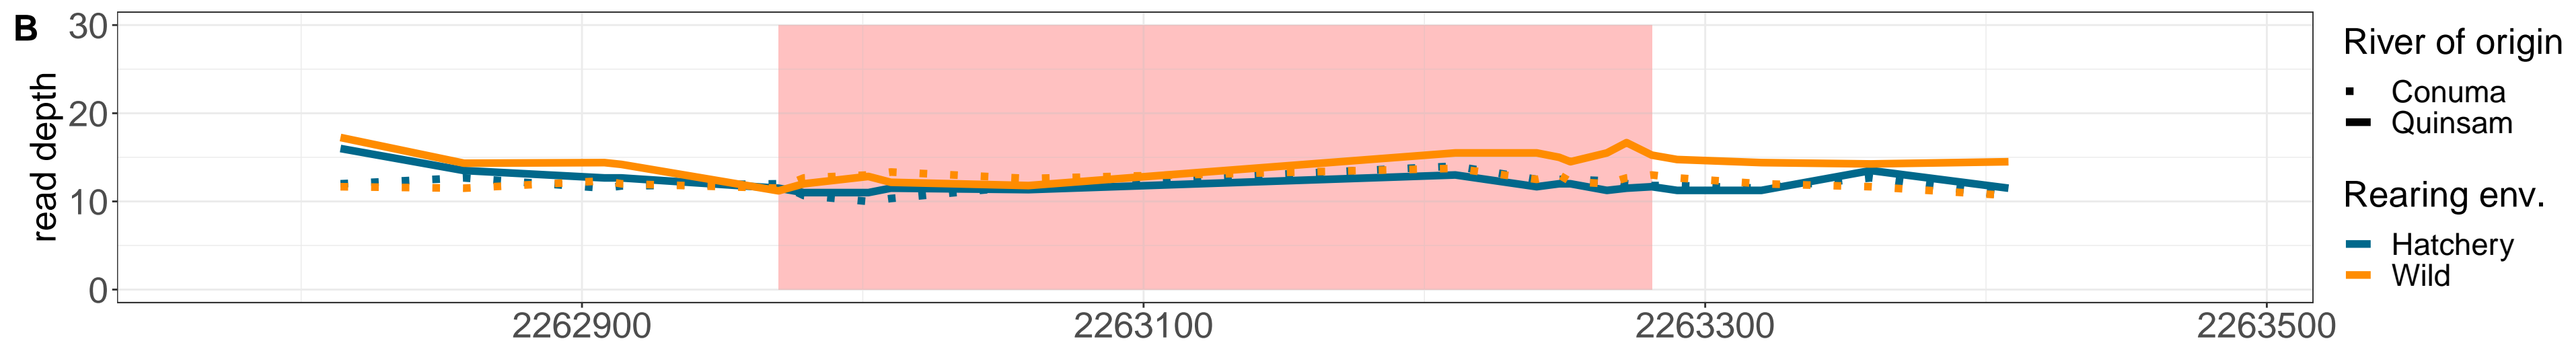

Position along chromosome 16

**A**

## DMR\_155

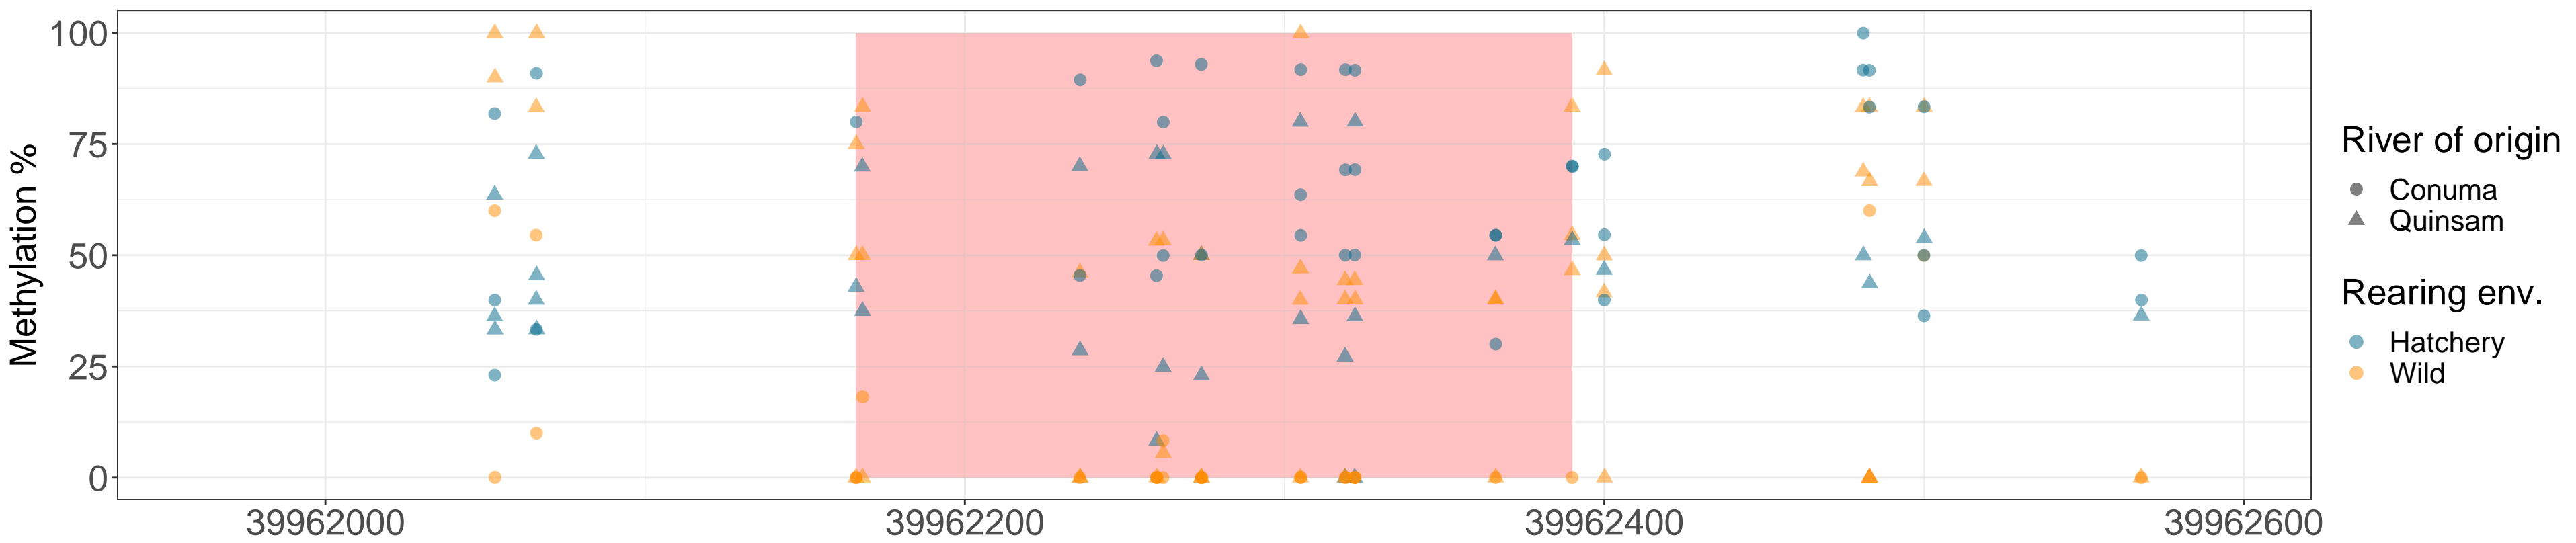**B**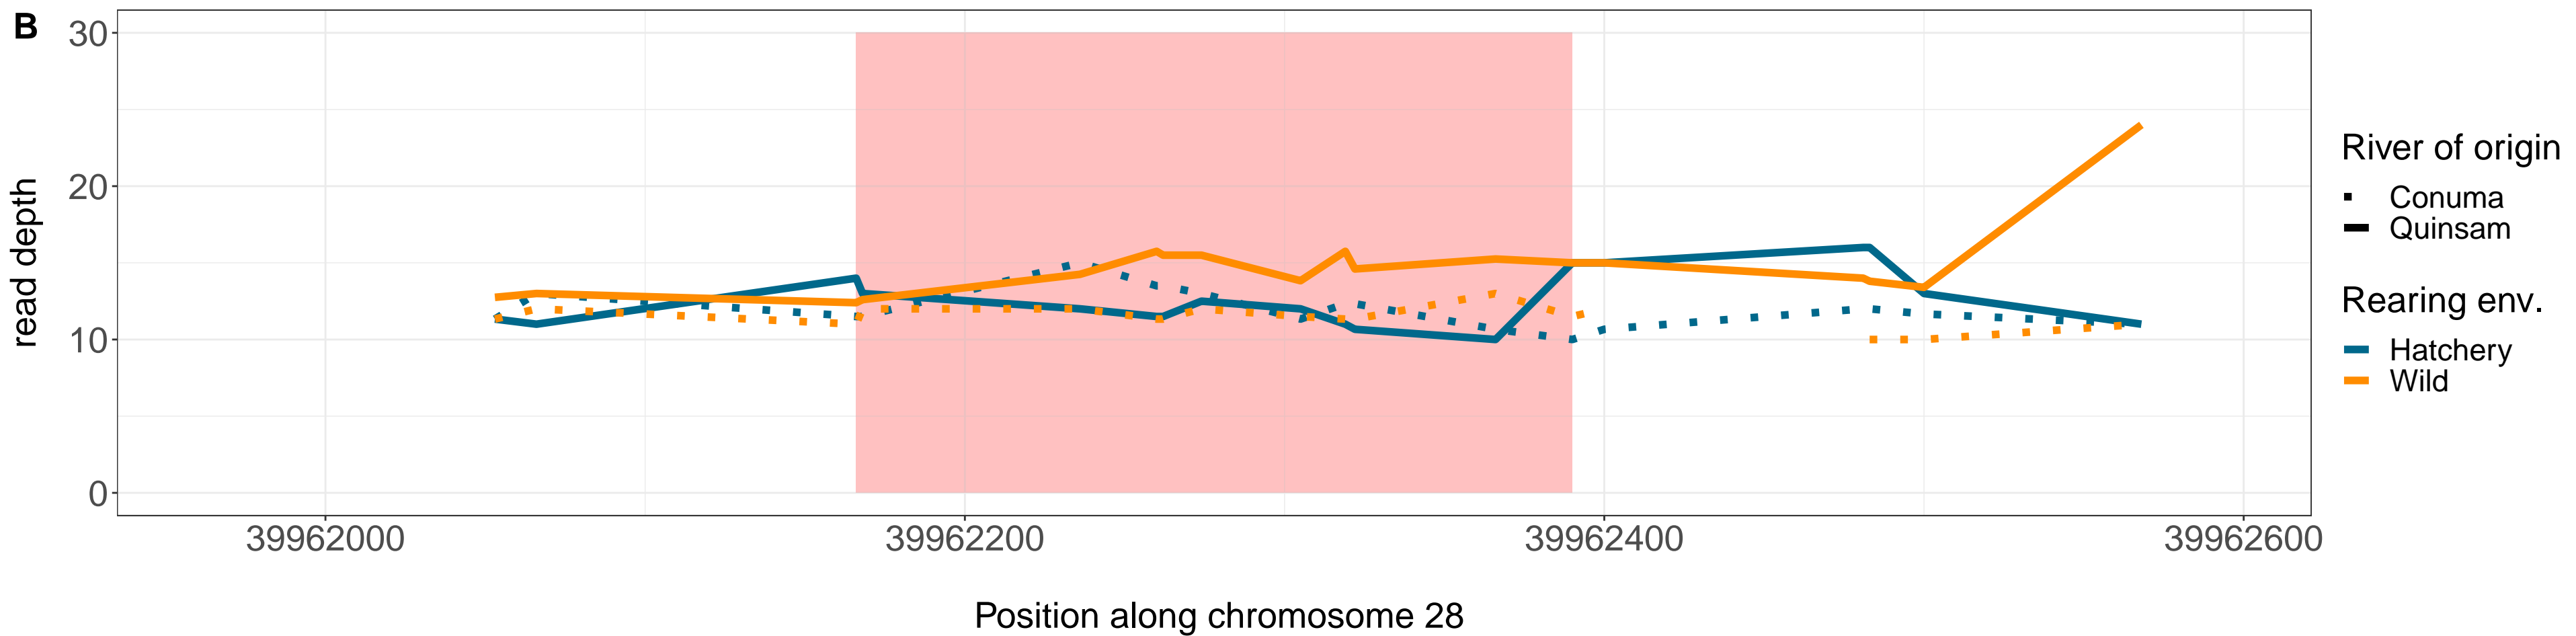

# DMR\_156

XM\_020488007.1

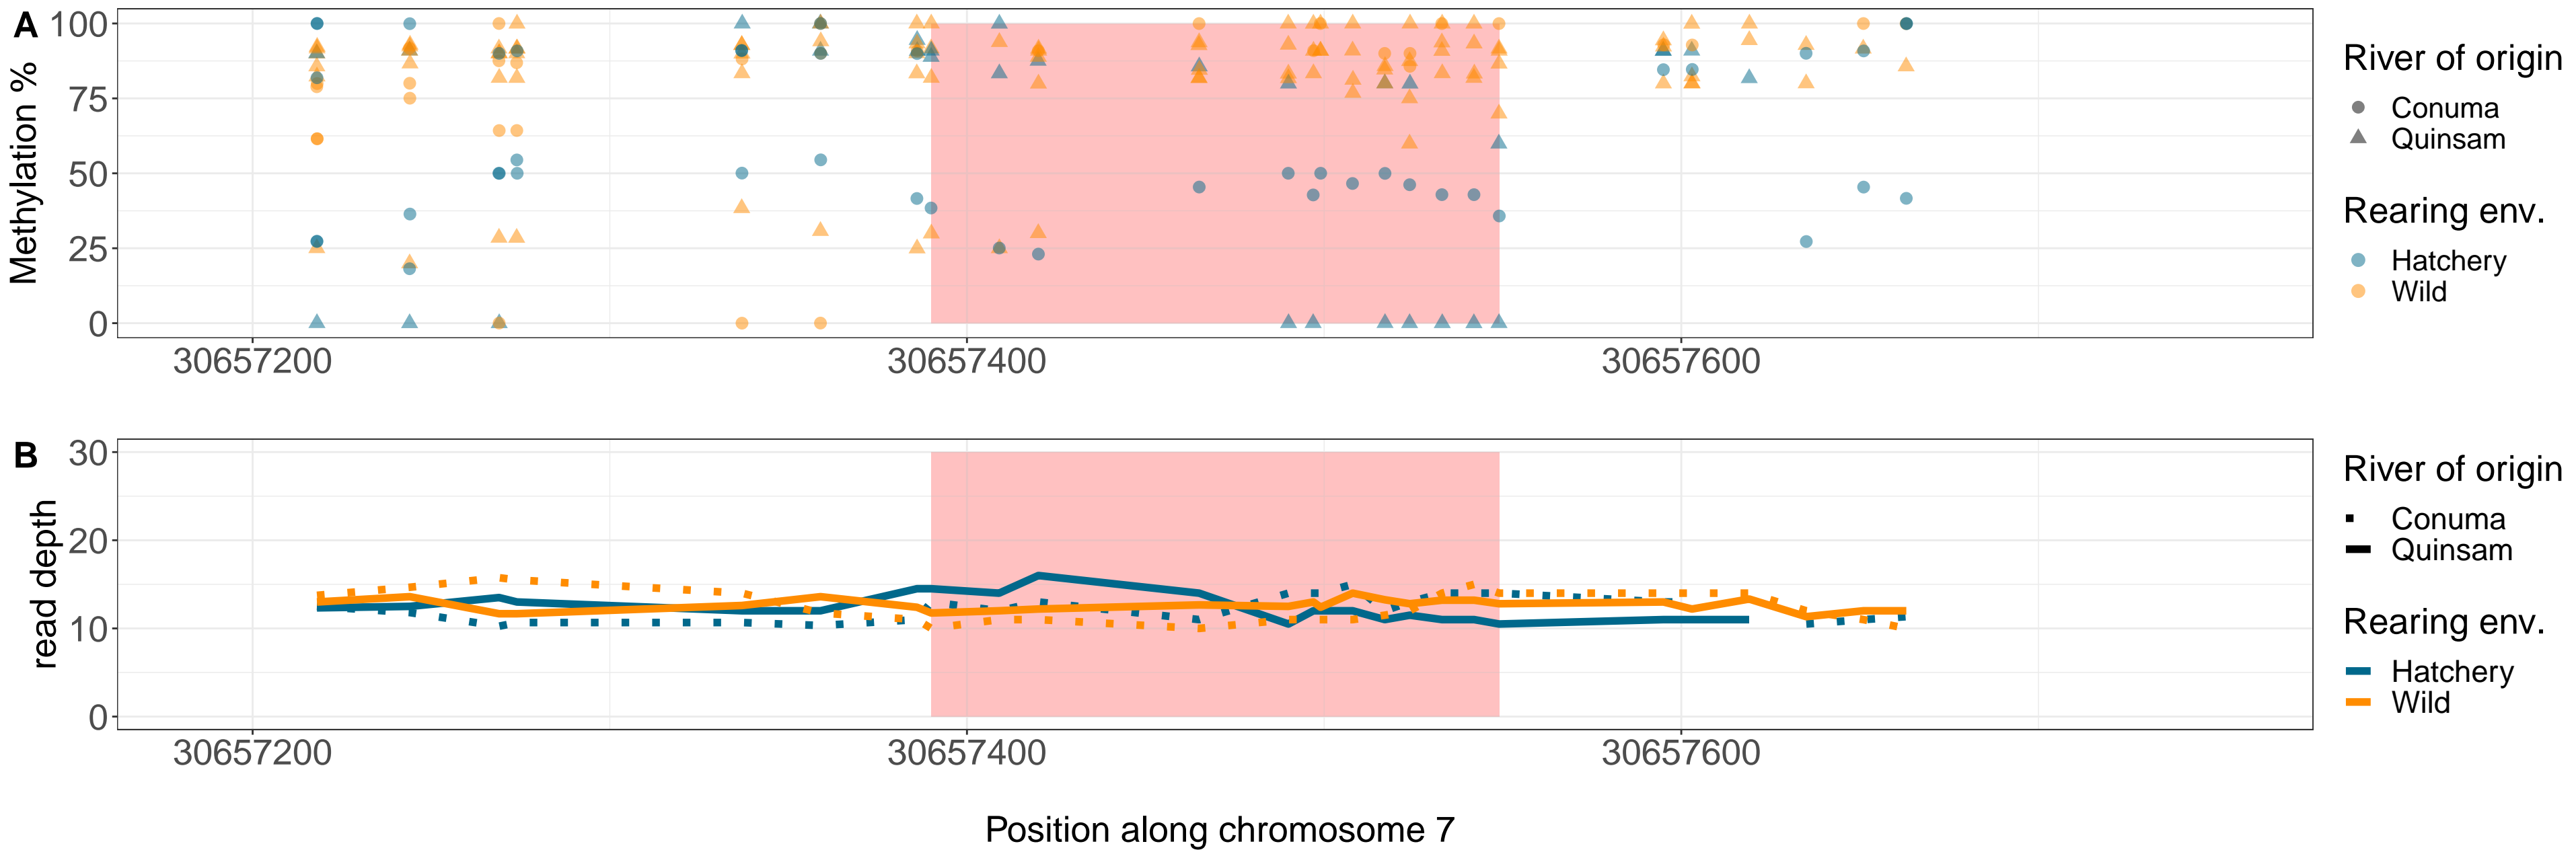

**A**

## DMR\_158

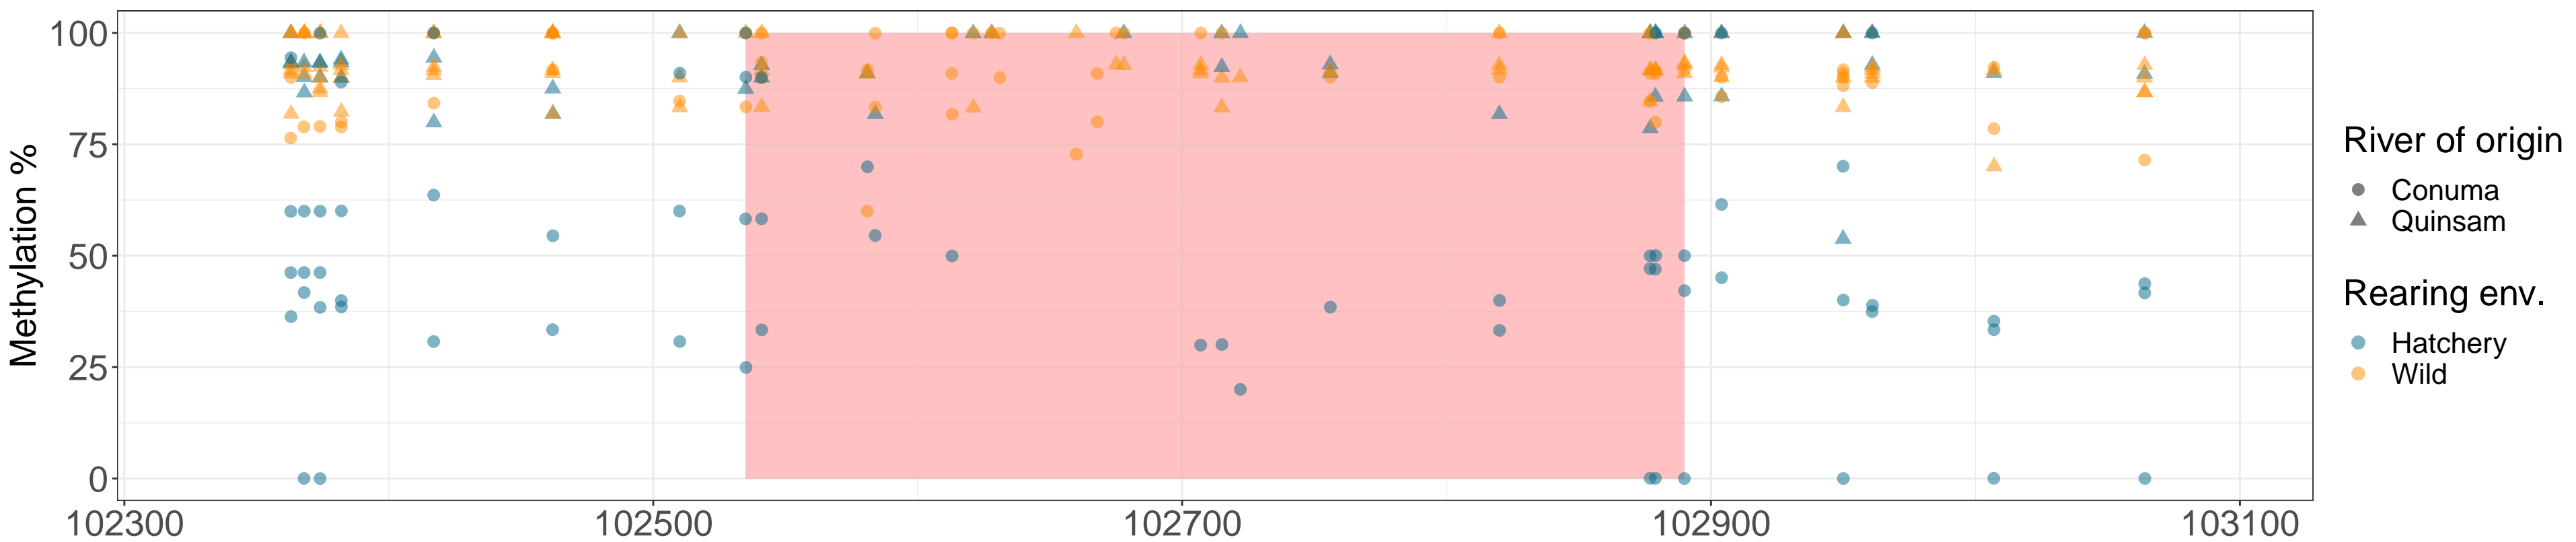**B**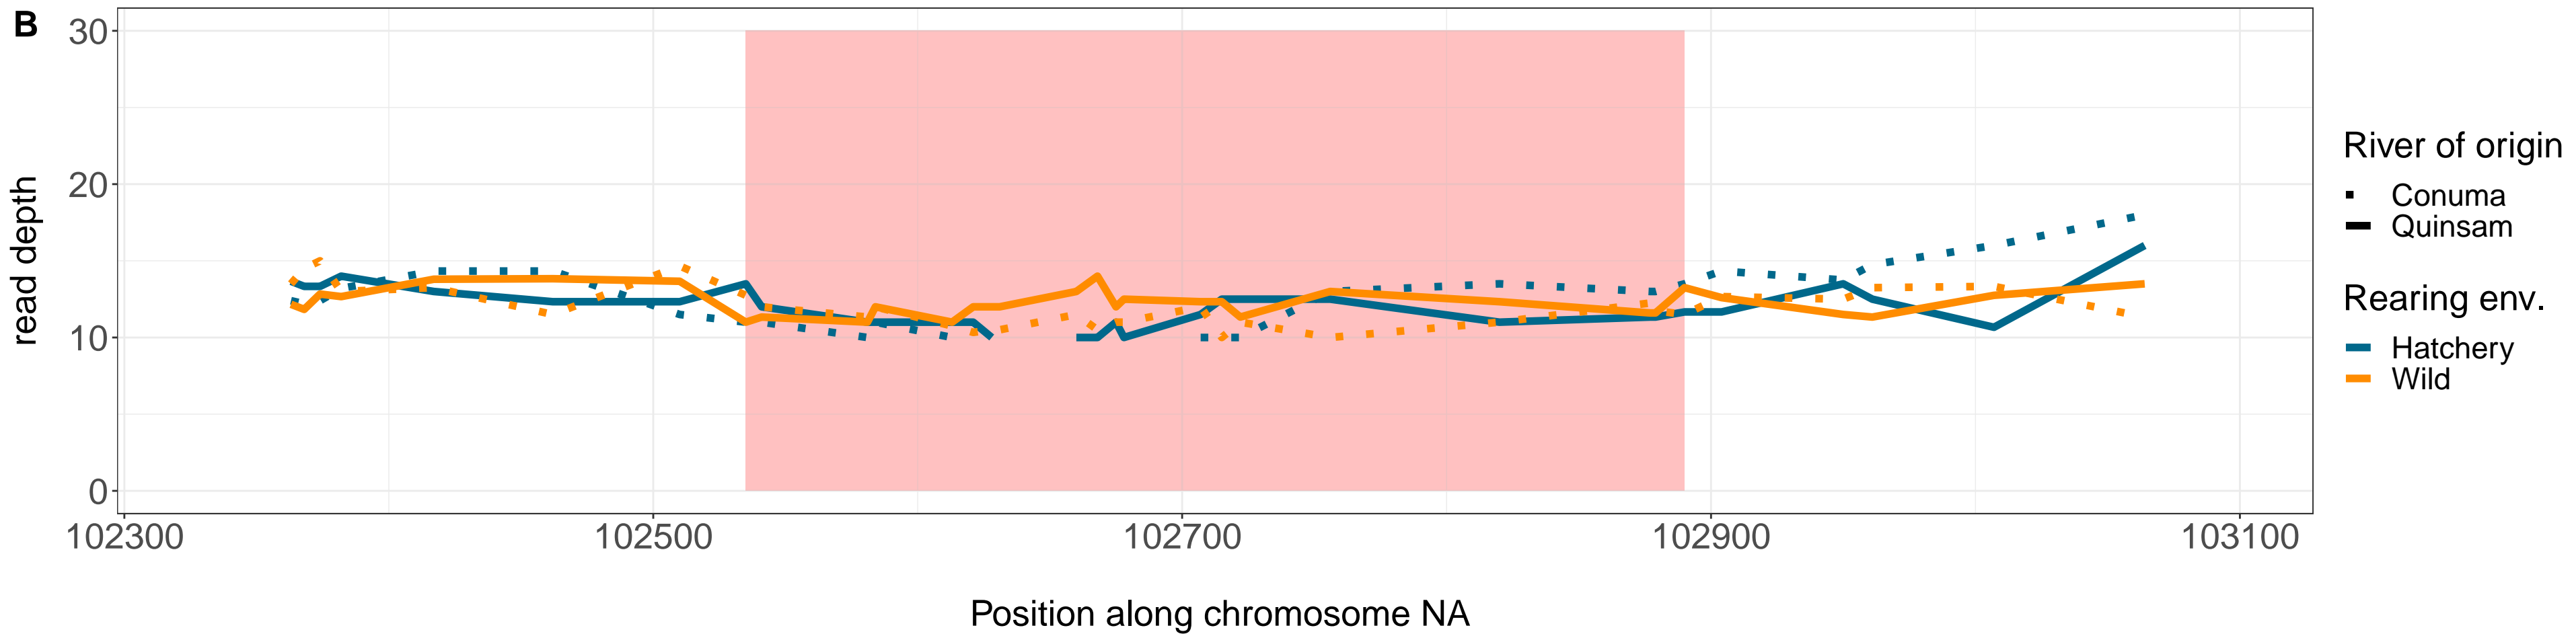

# DMR\_159

XM\_020455546.1

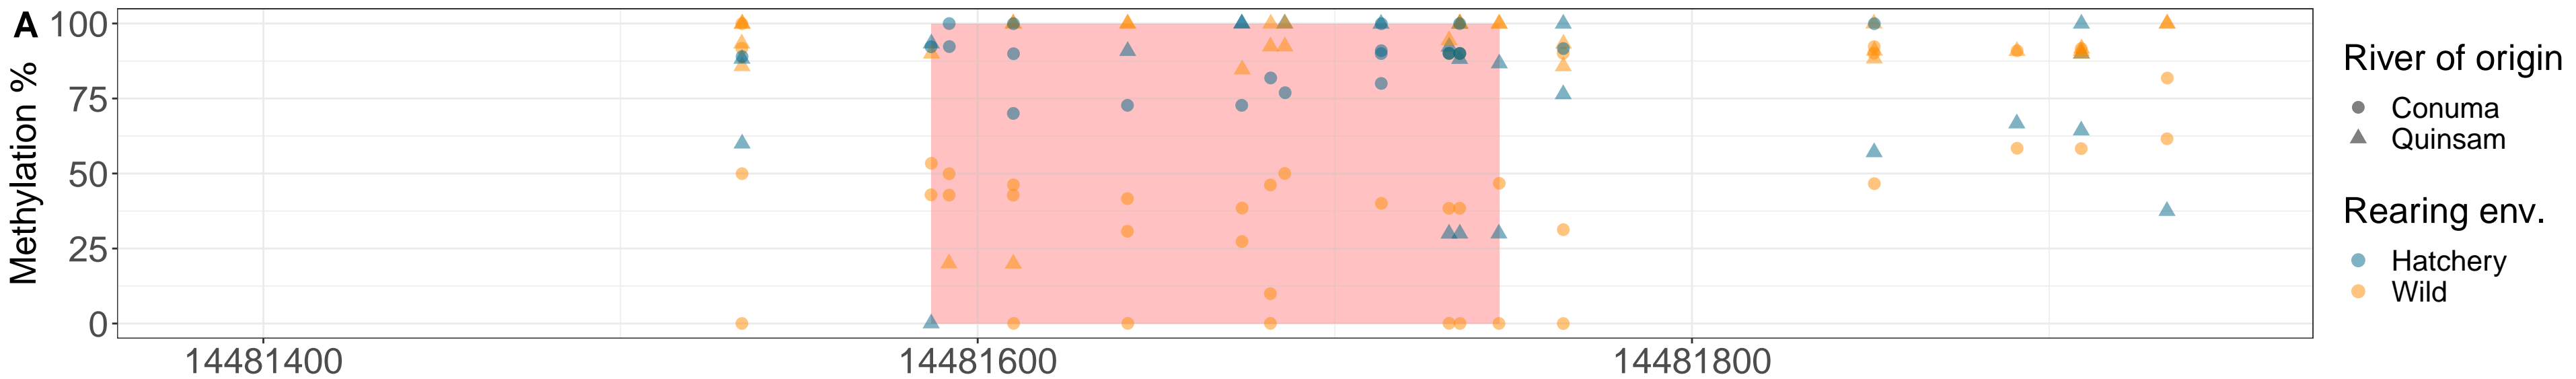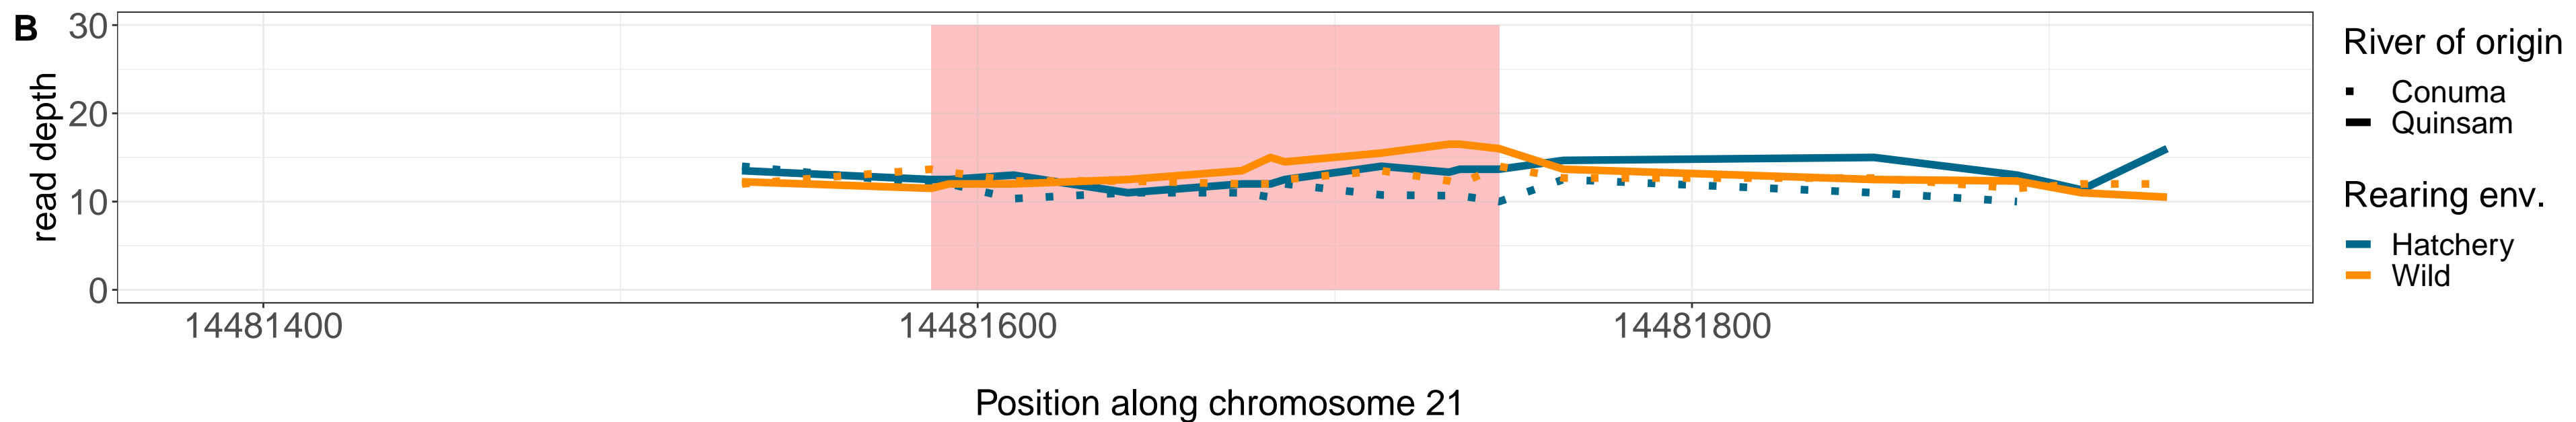

# DMR\_160

XM\_020460555.1

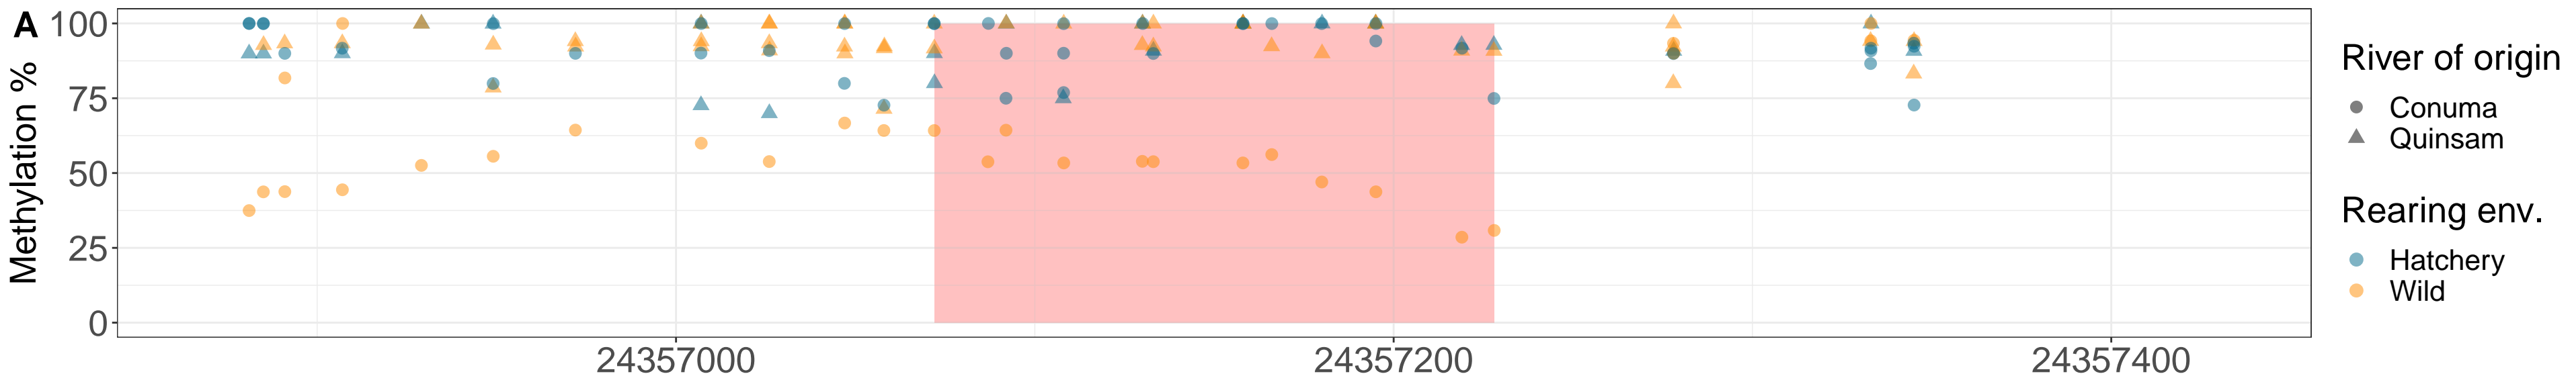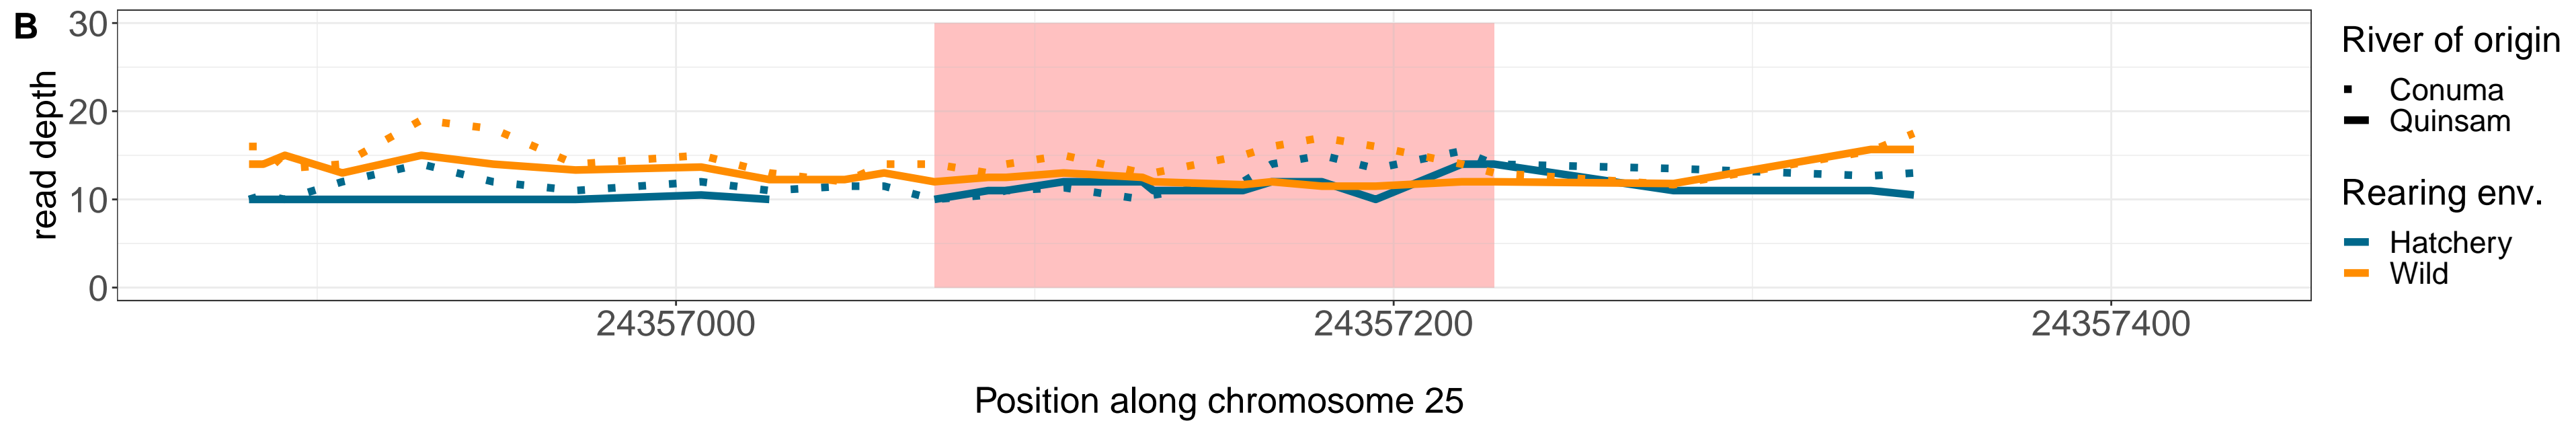

**A**

## DMR\_162

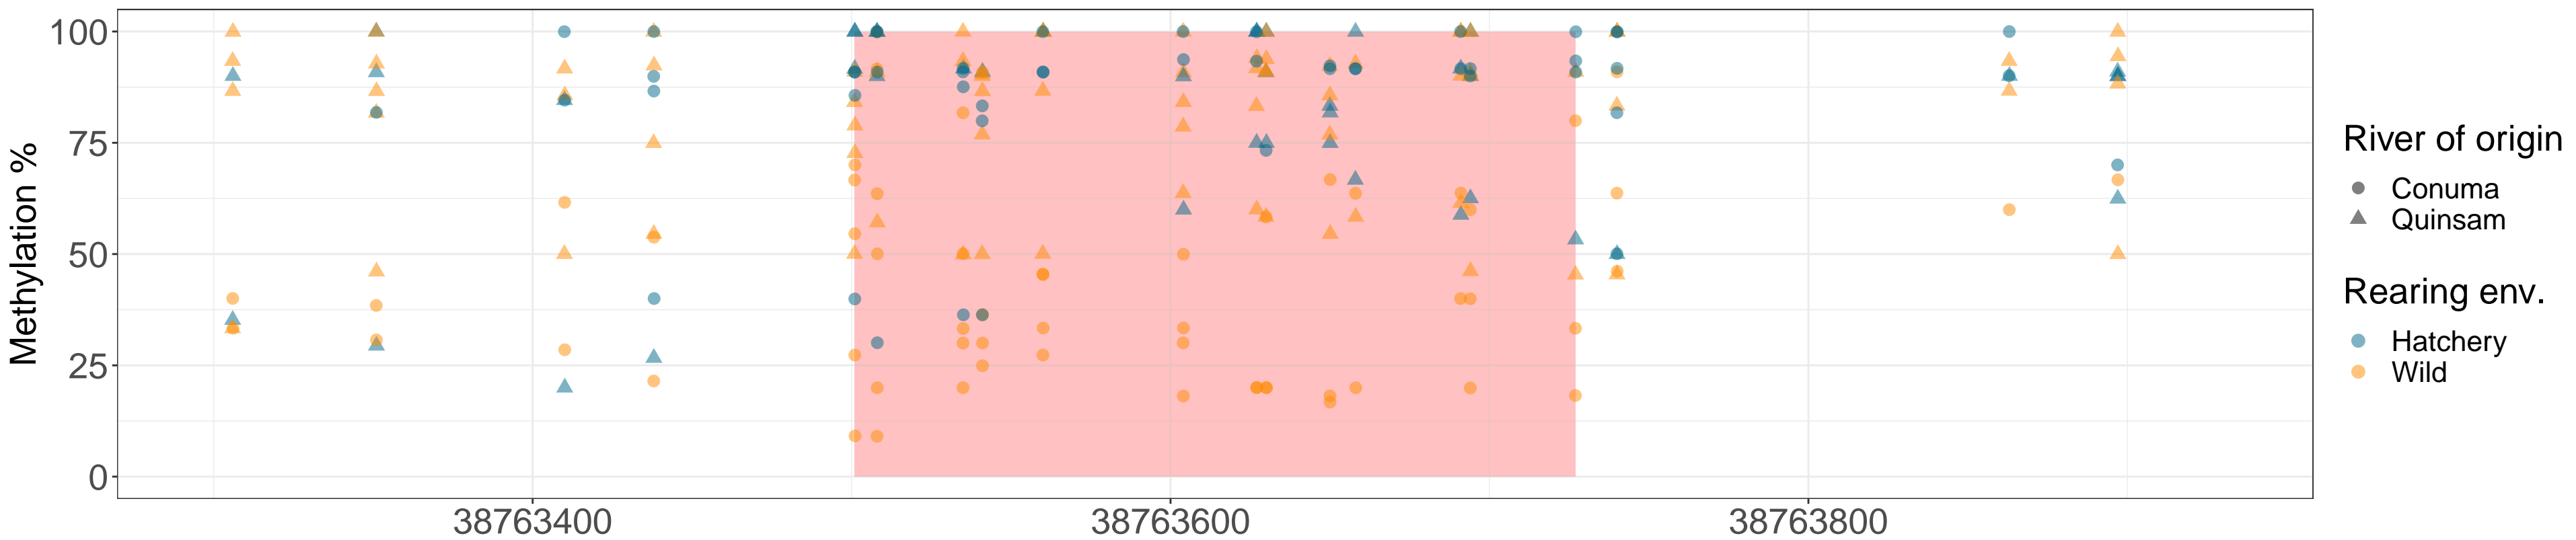**B**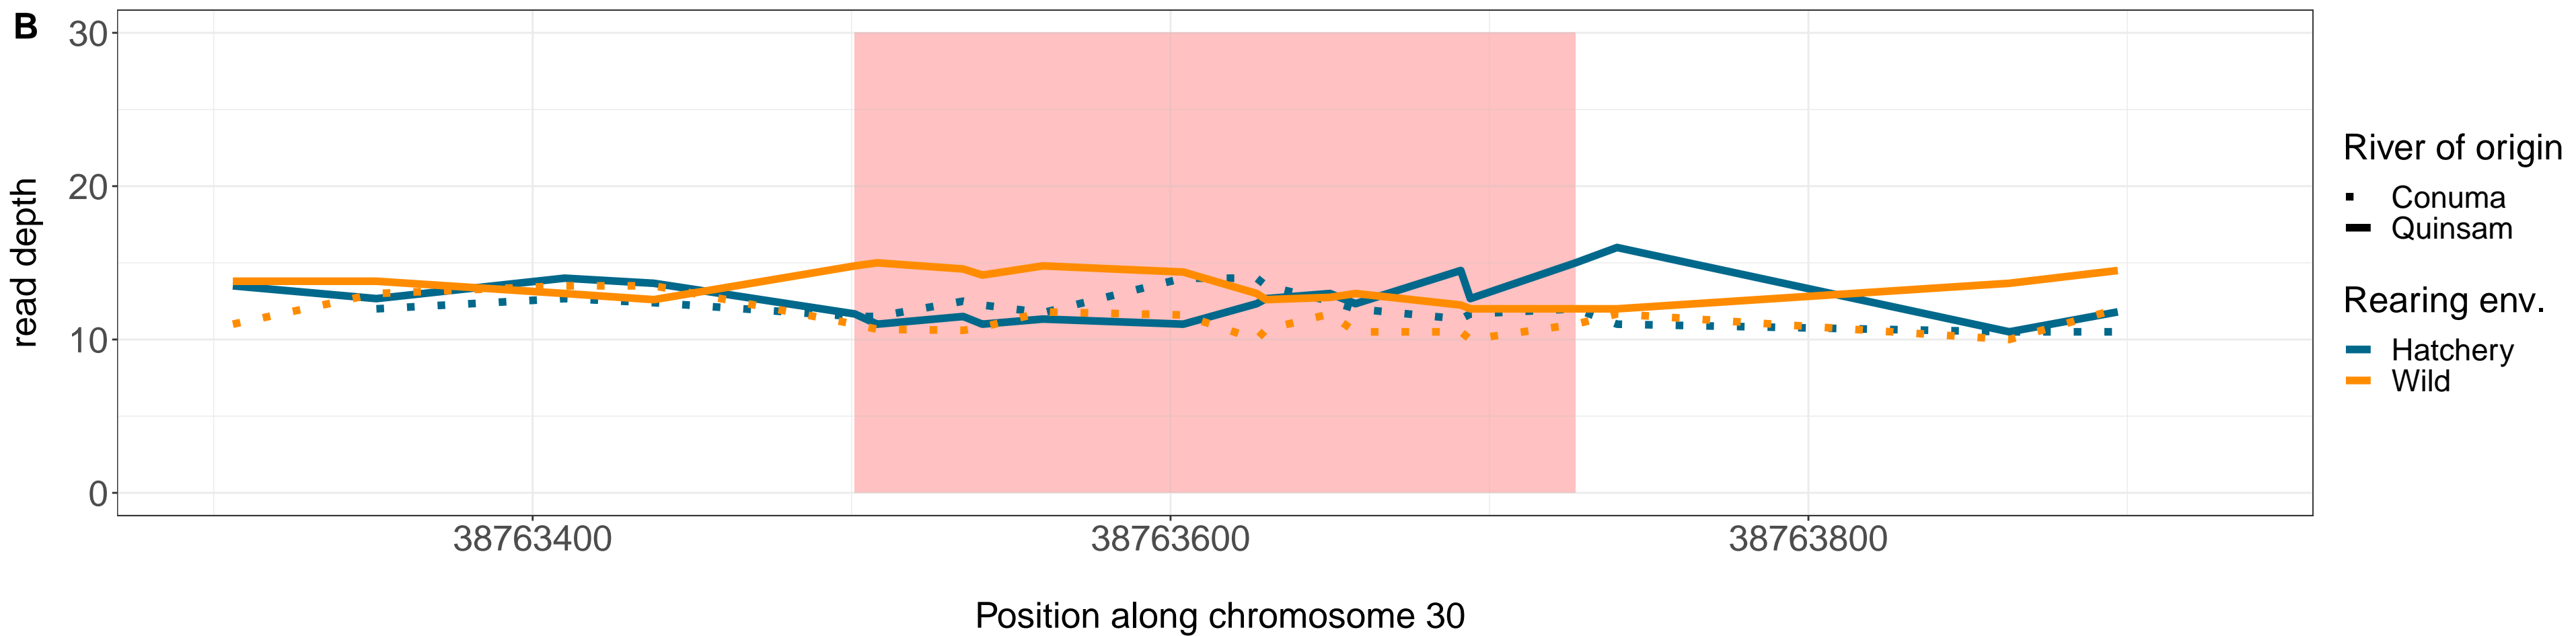



# DMR\_163

XM\_020500105.1

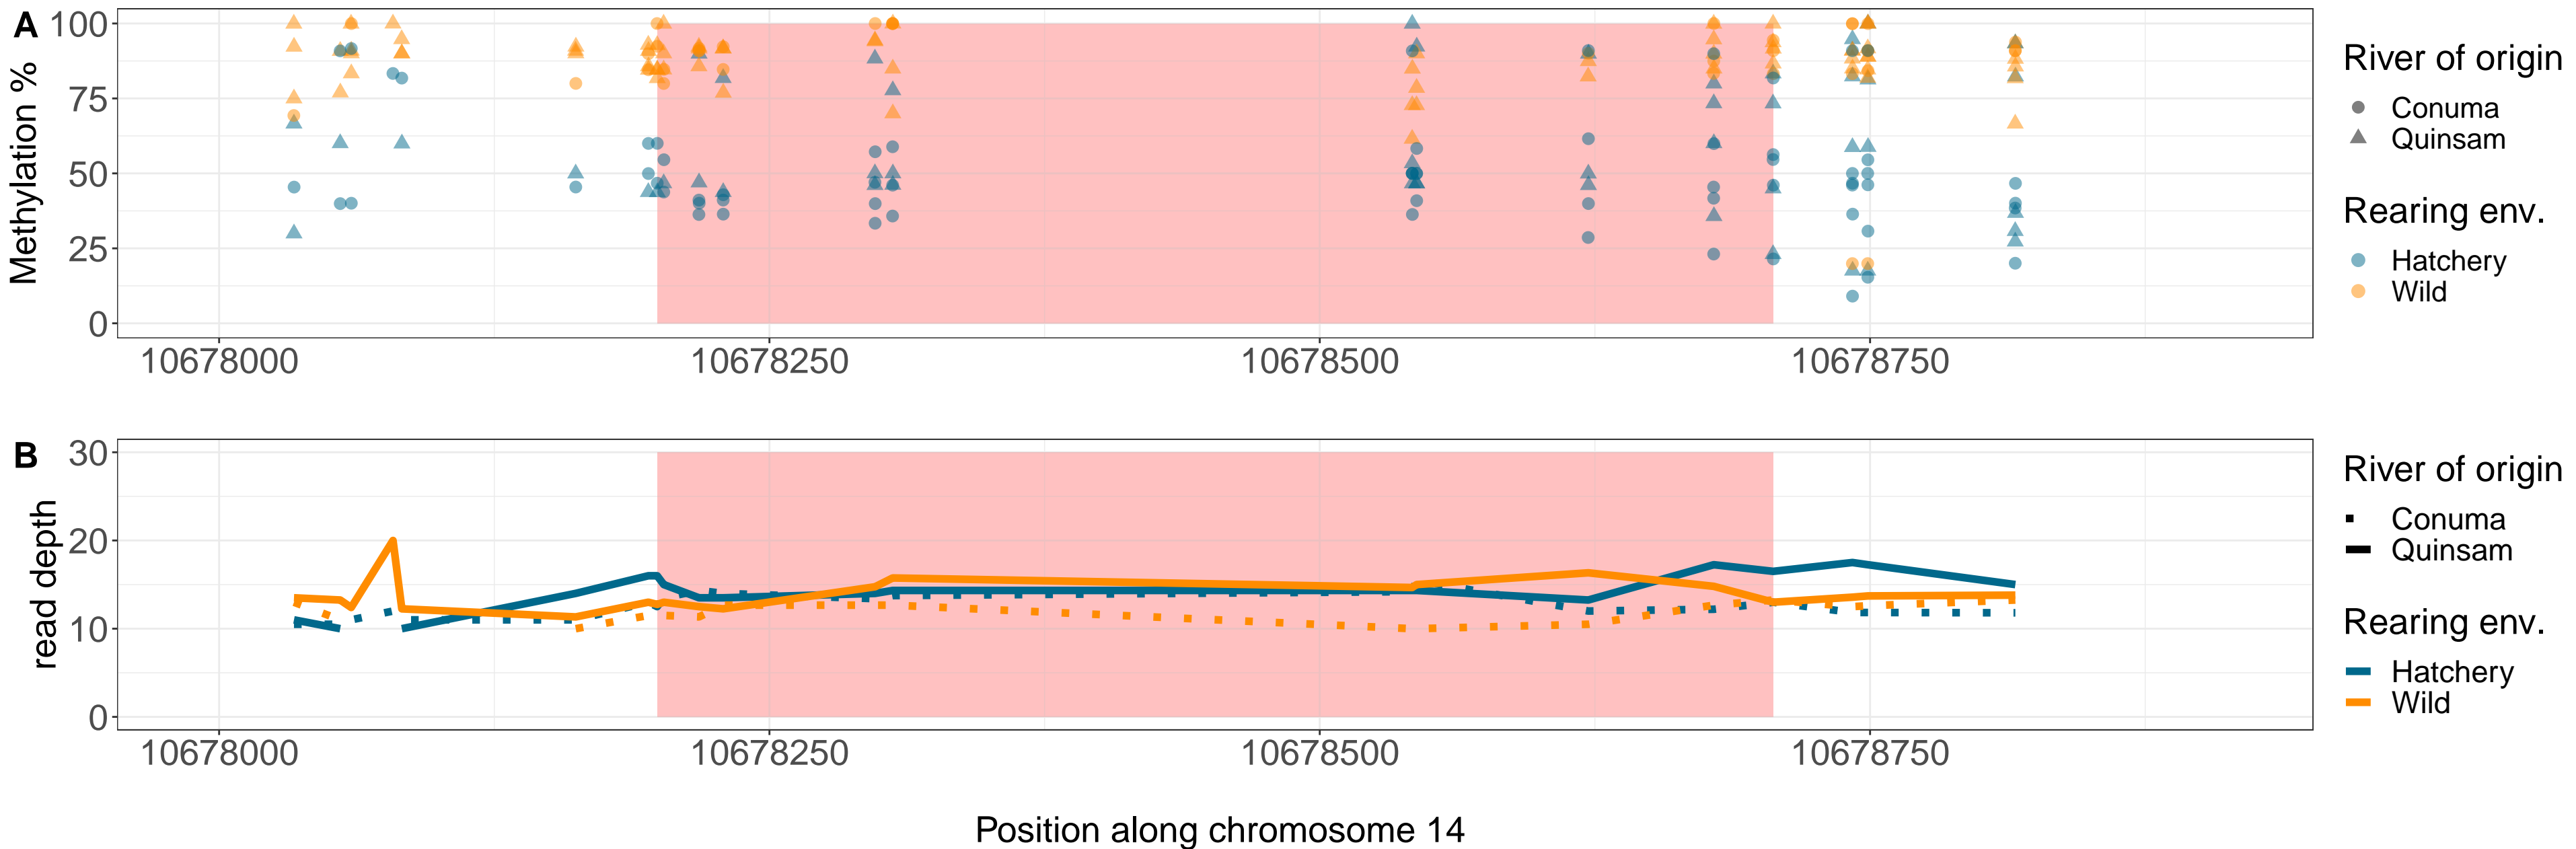

# DMR\_164

XM\_020485832.1

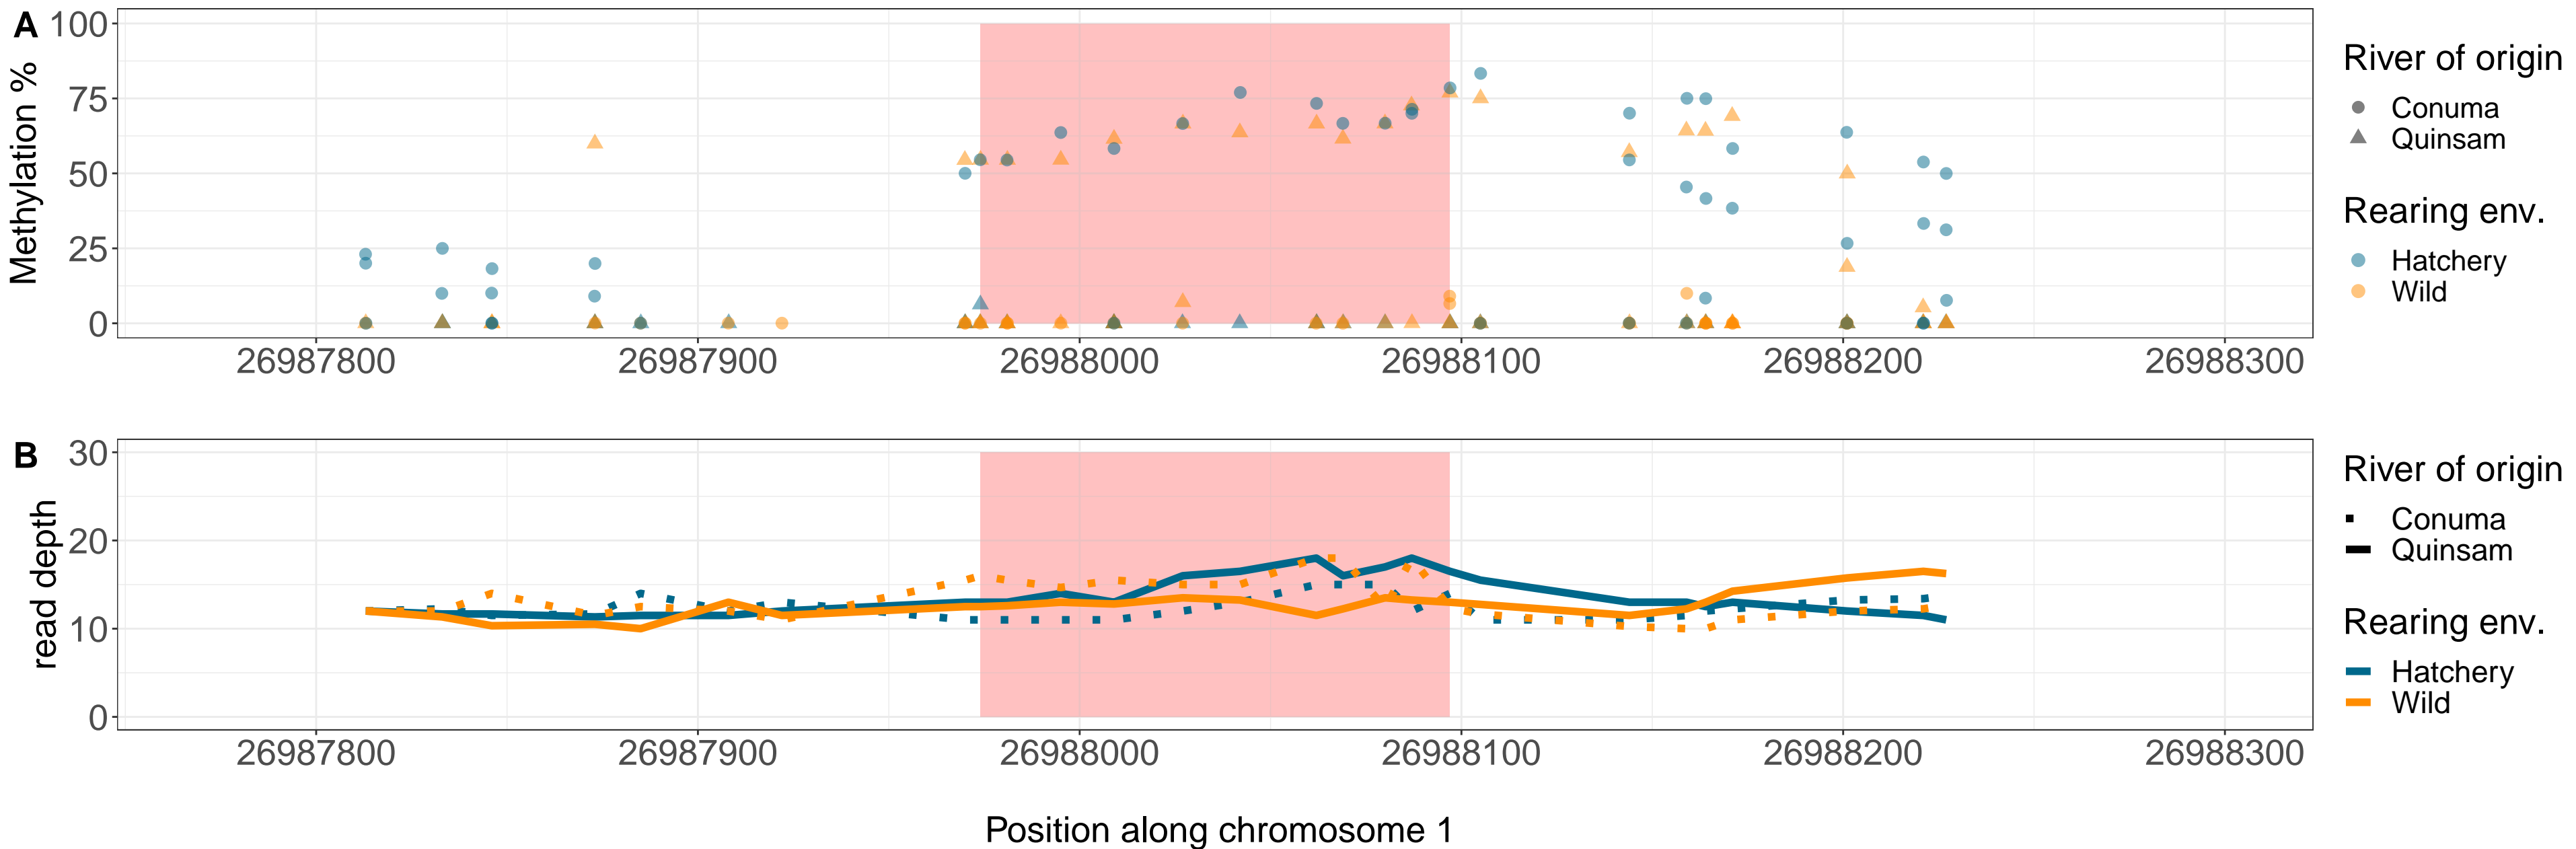

**A**

## DMR\_166

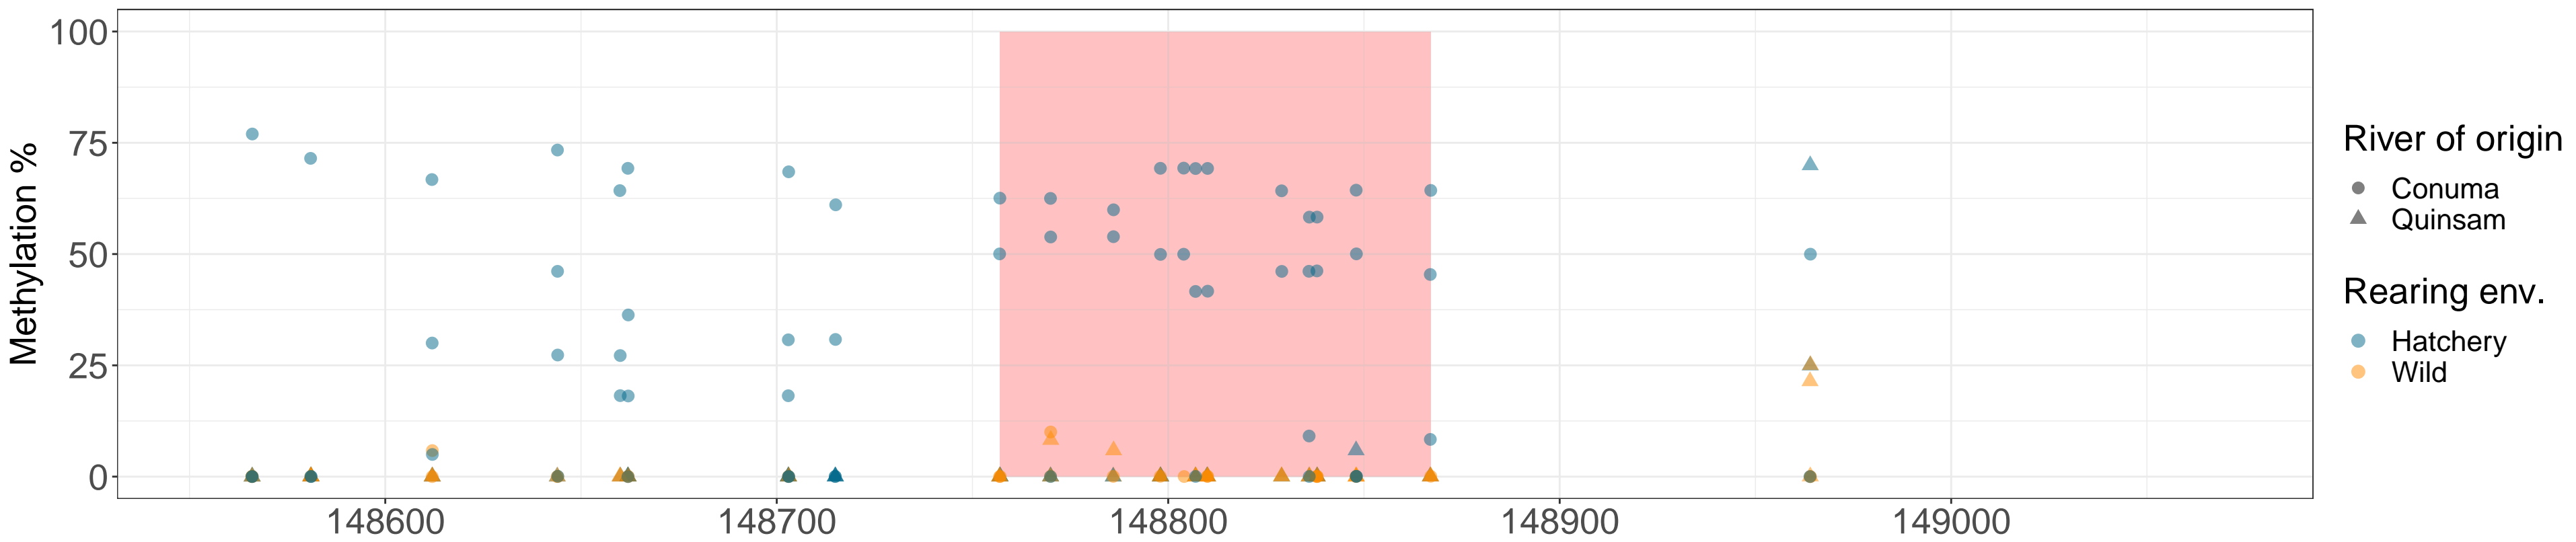**B**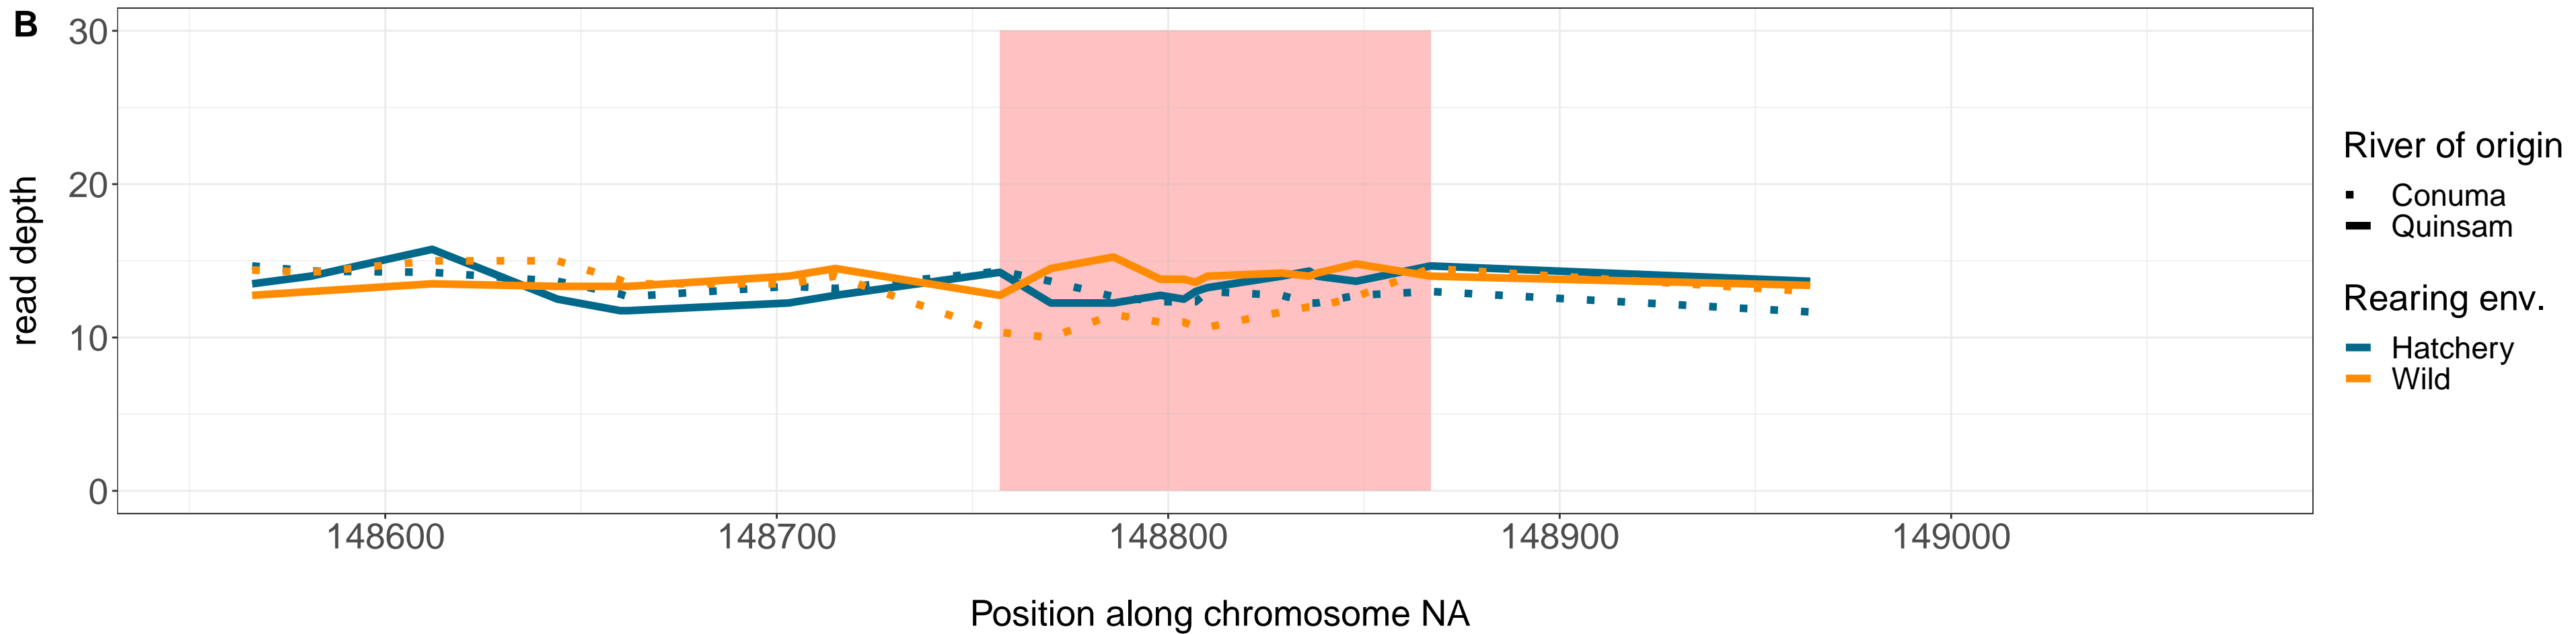

**A**

## DMR\_167

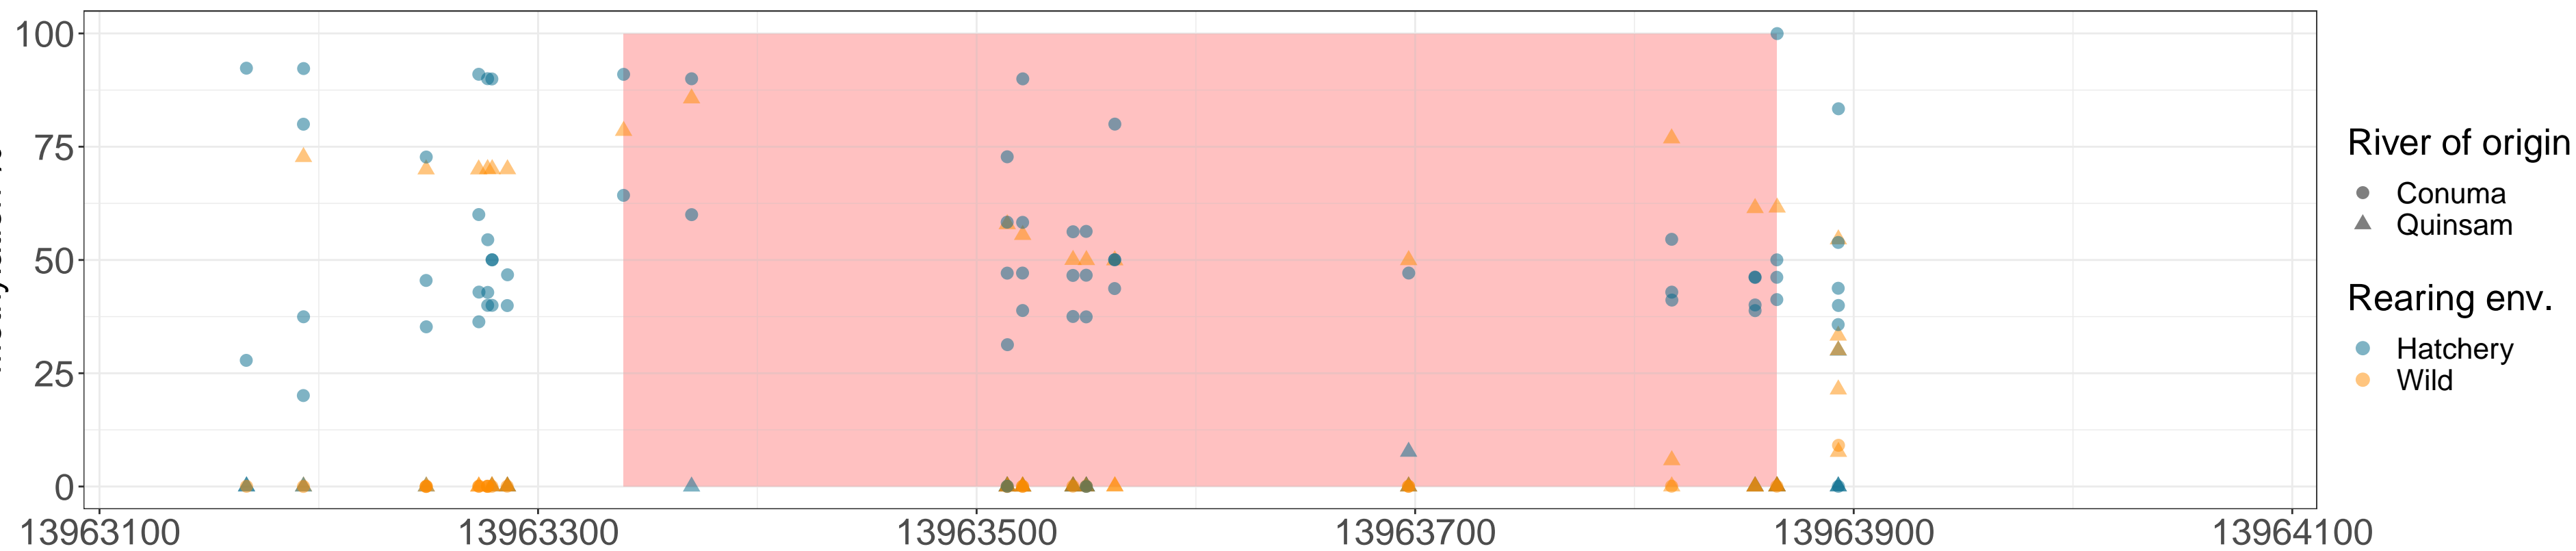**B**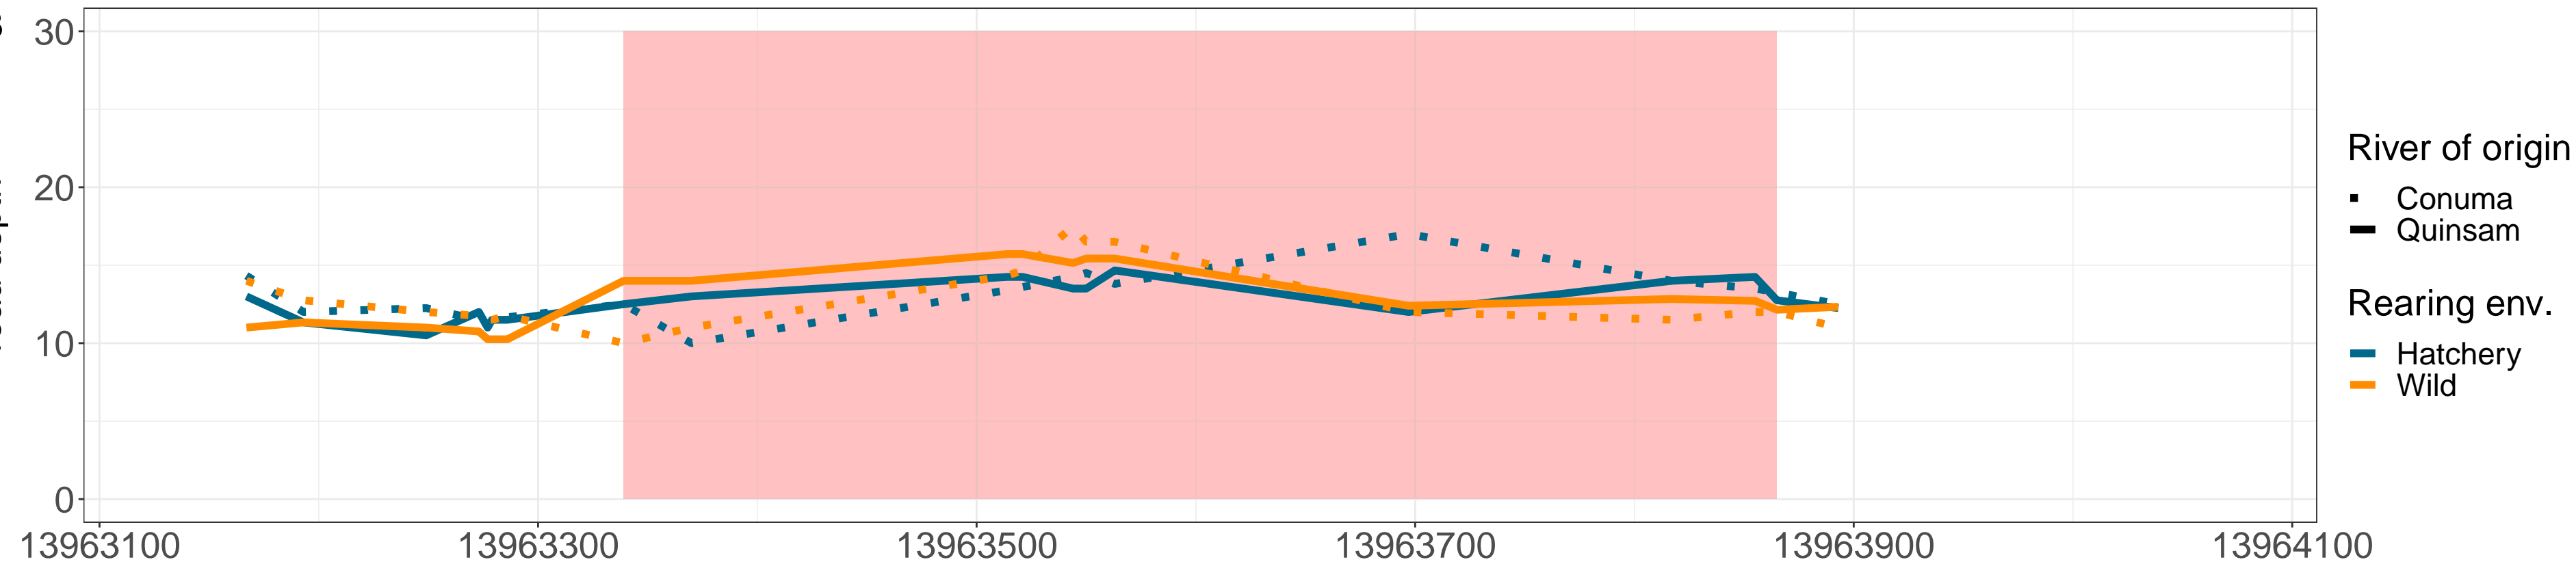

Position along chromosome 27

# DMR\_168

XM\_020487402.1

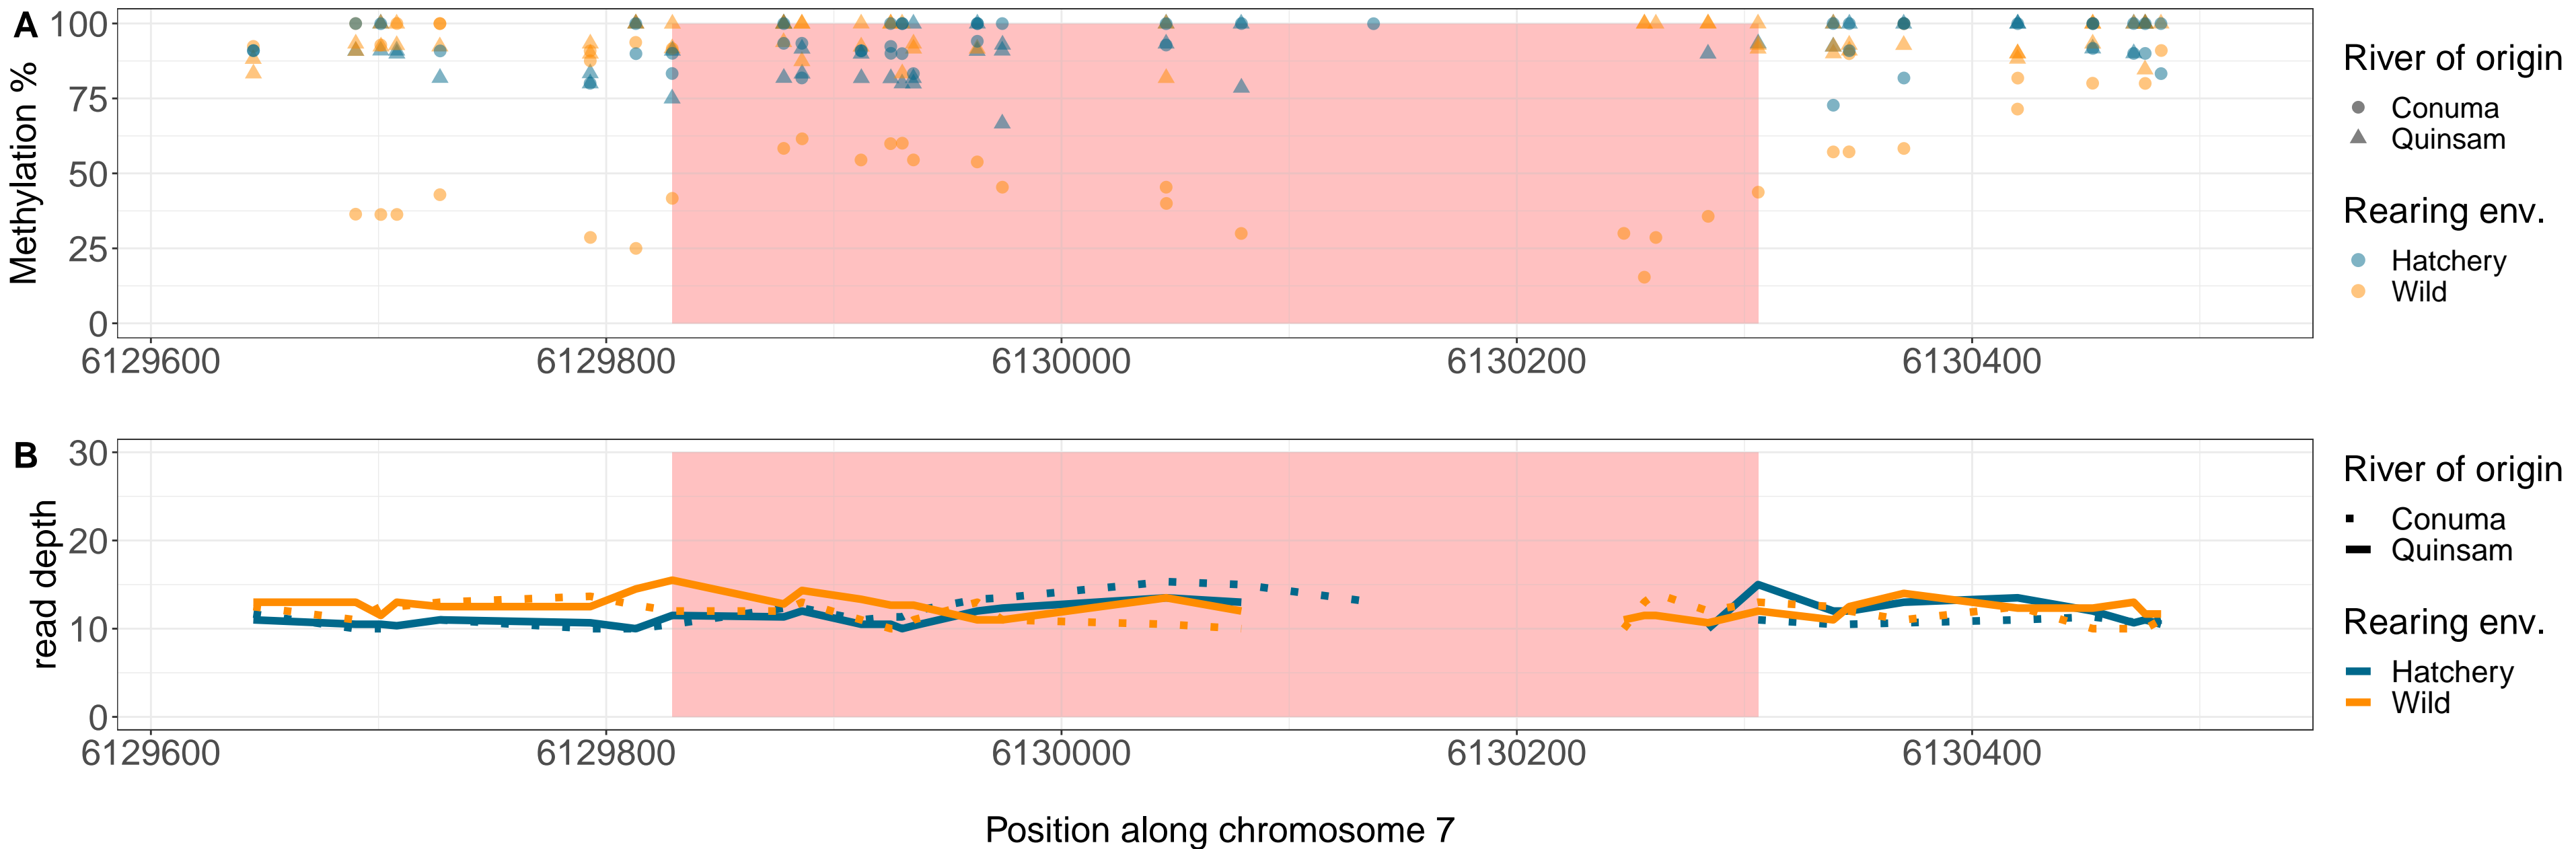

**A**

## DMR\_169

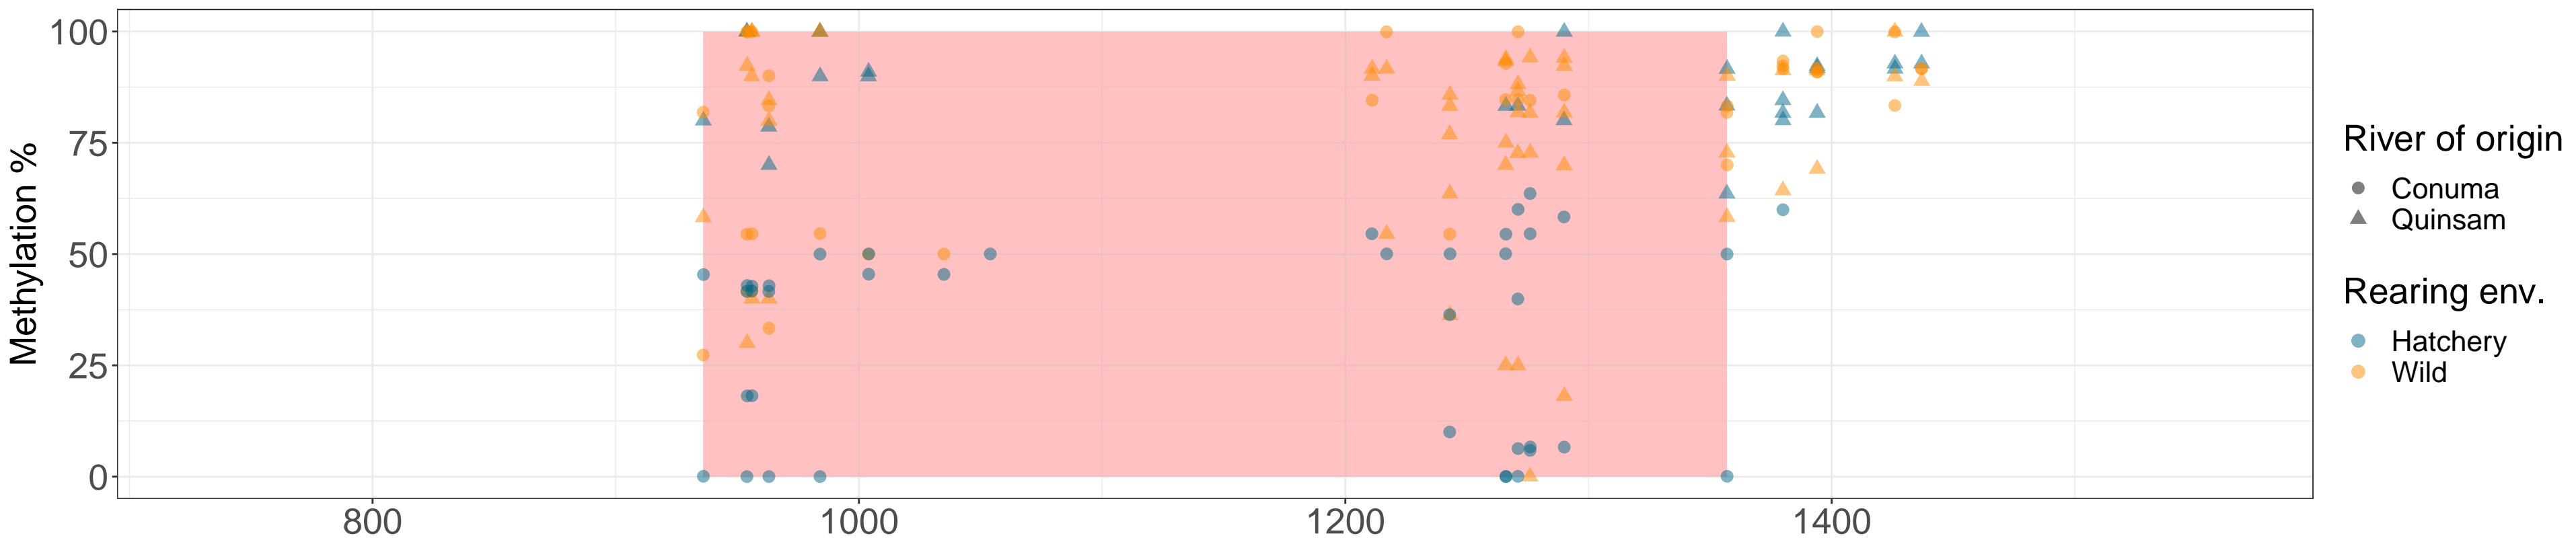**B**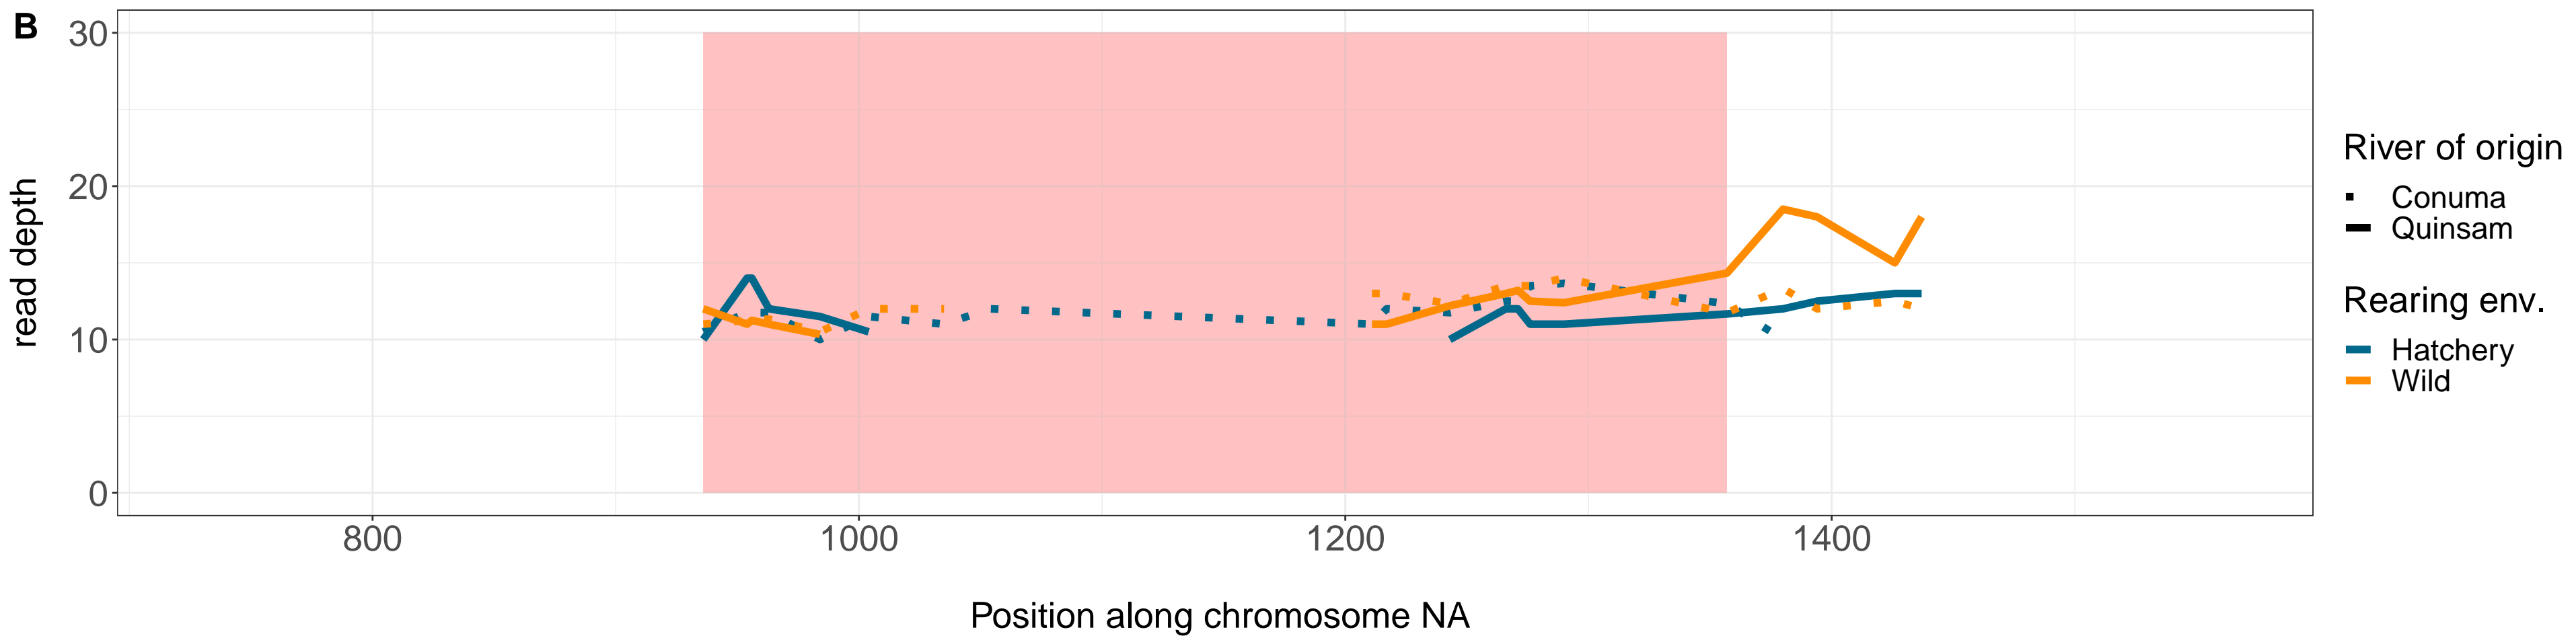

**A**

## DMR\_170

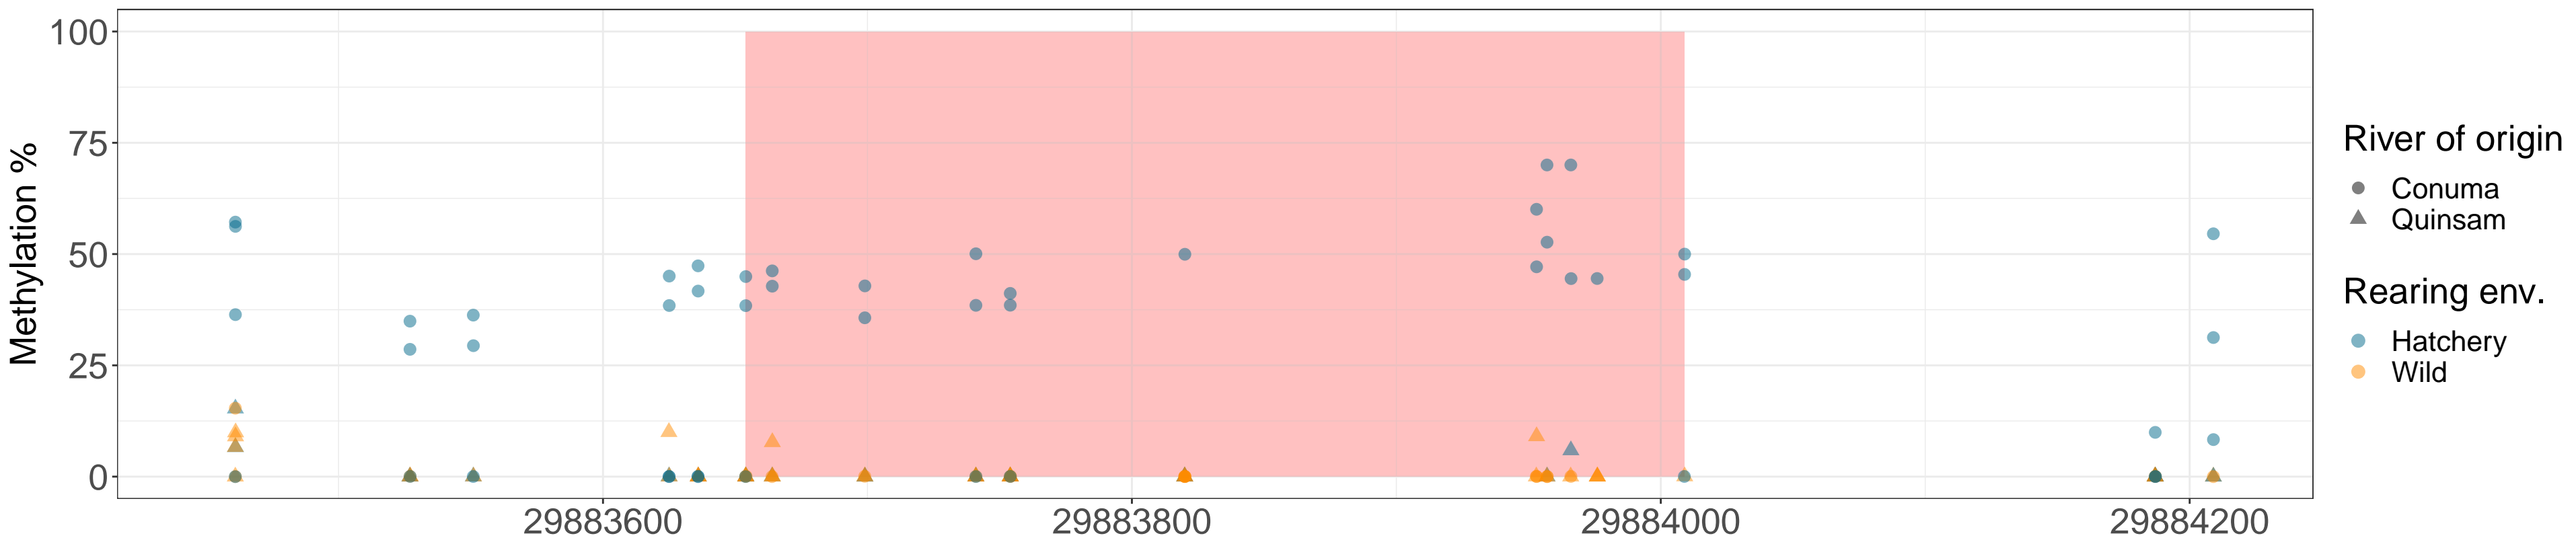**B**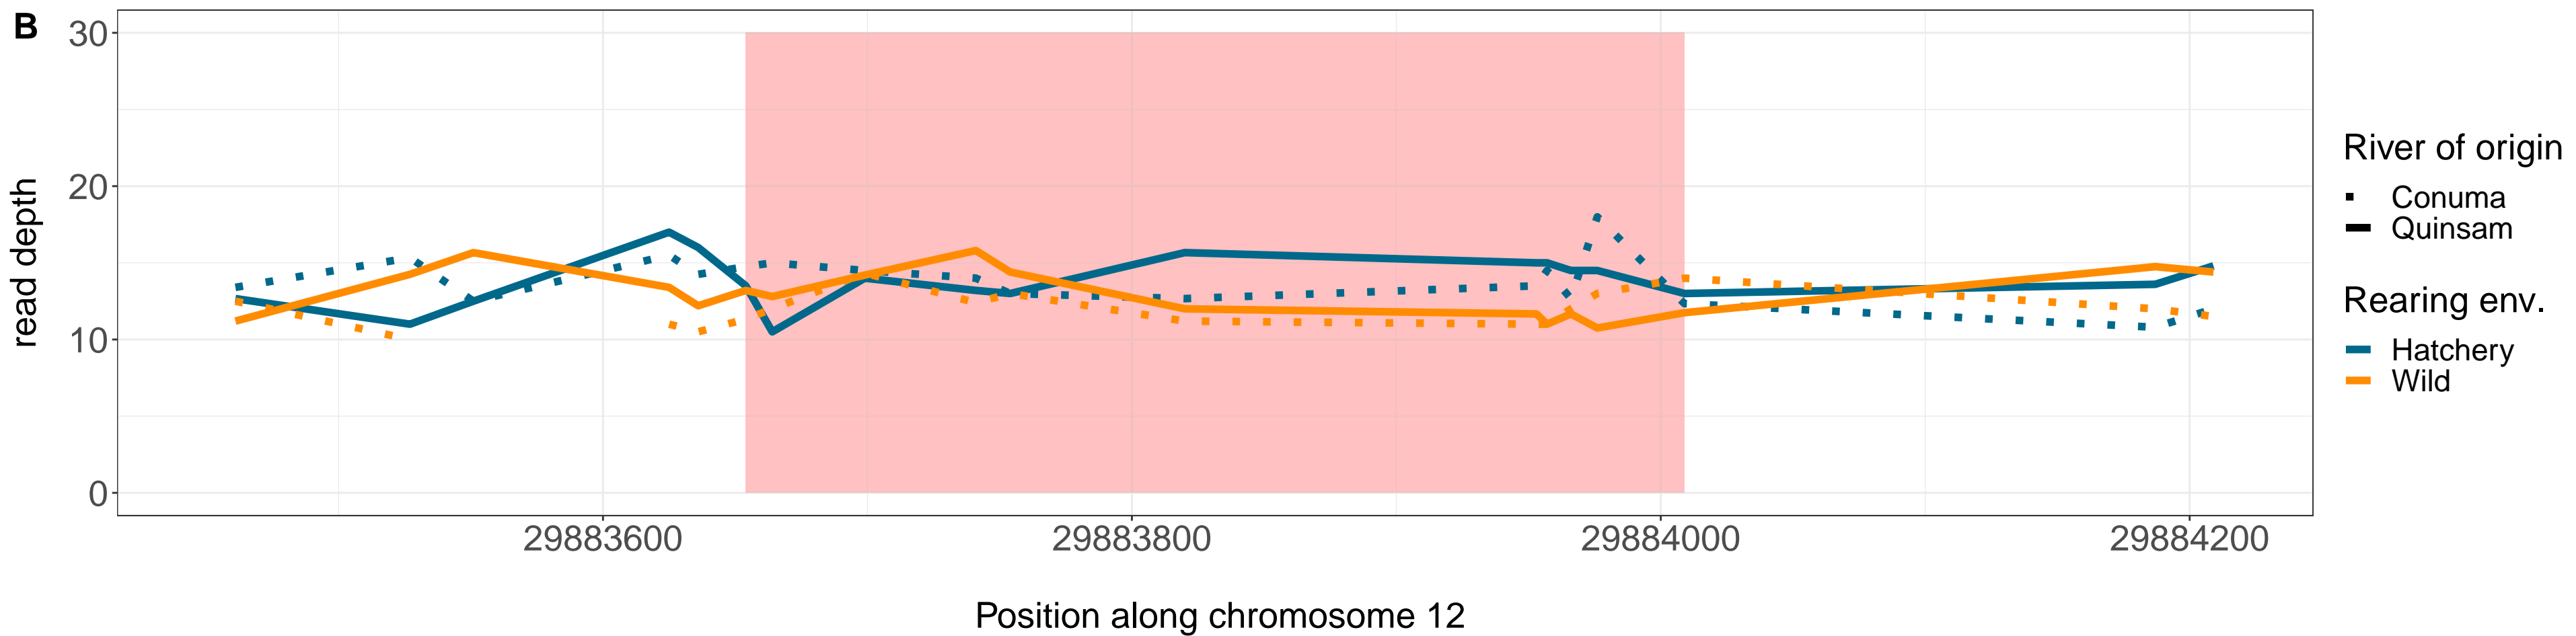

**A**

## DMR\_171

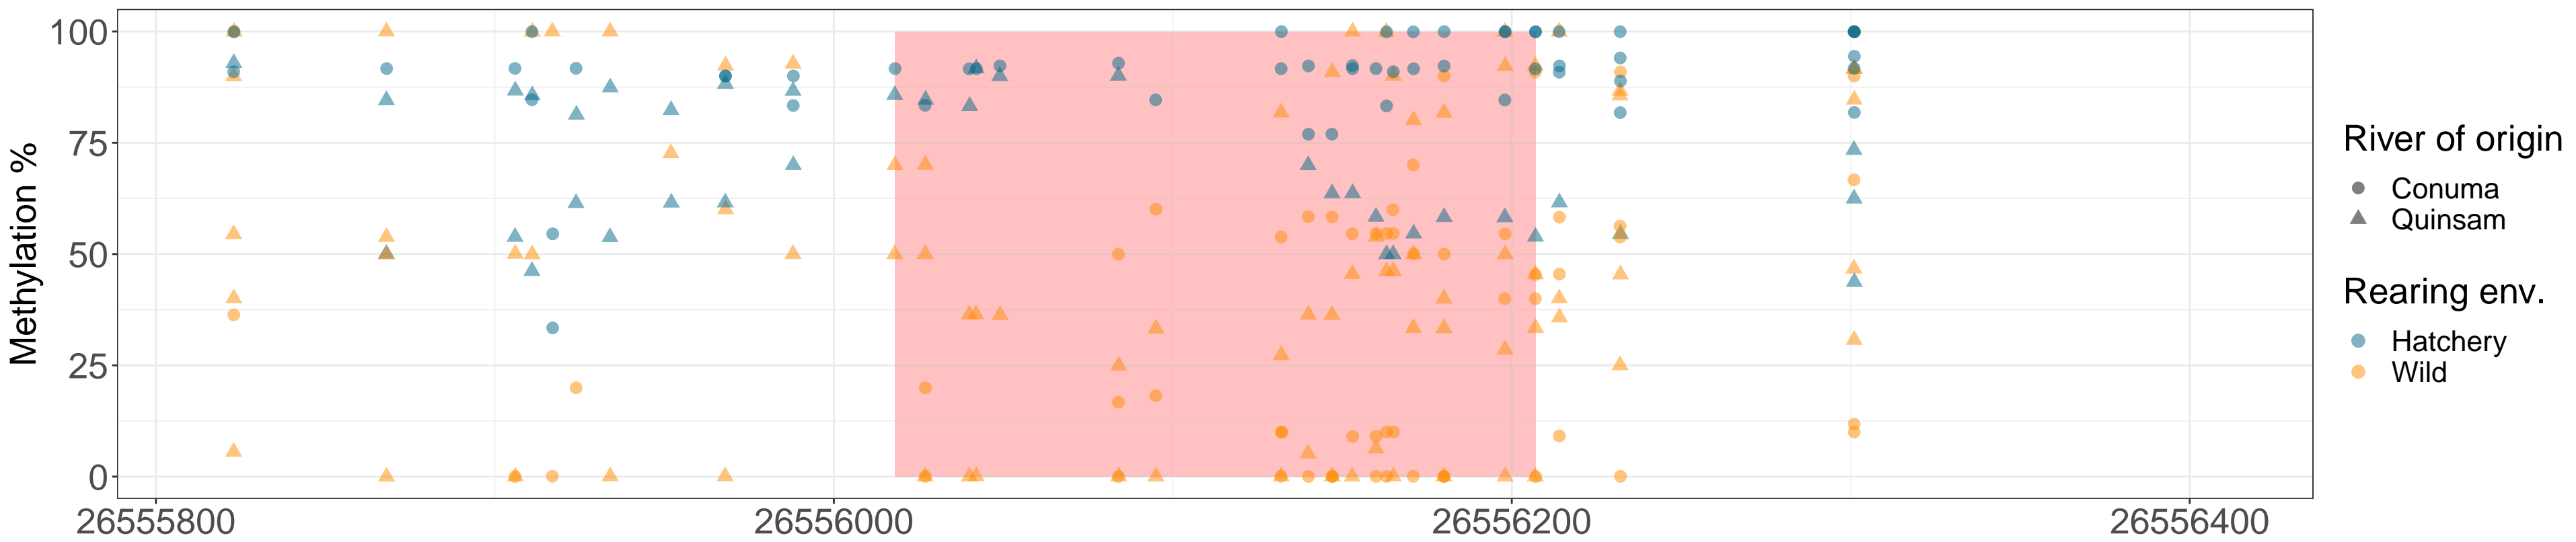**B**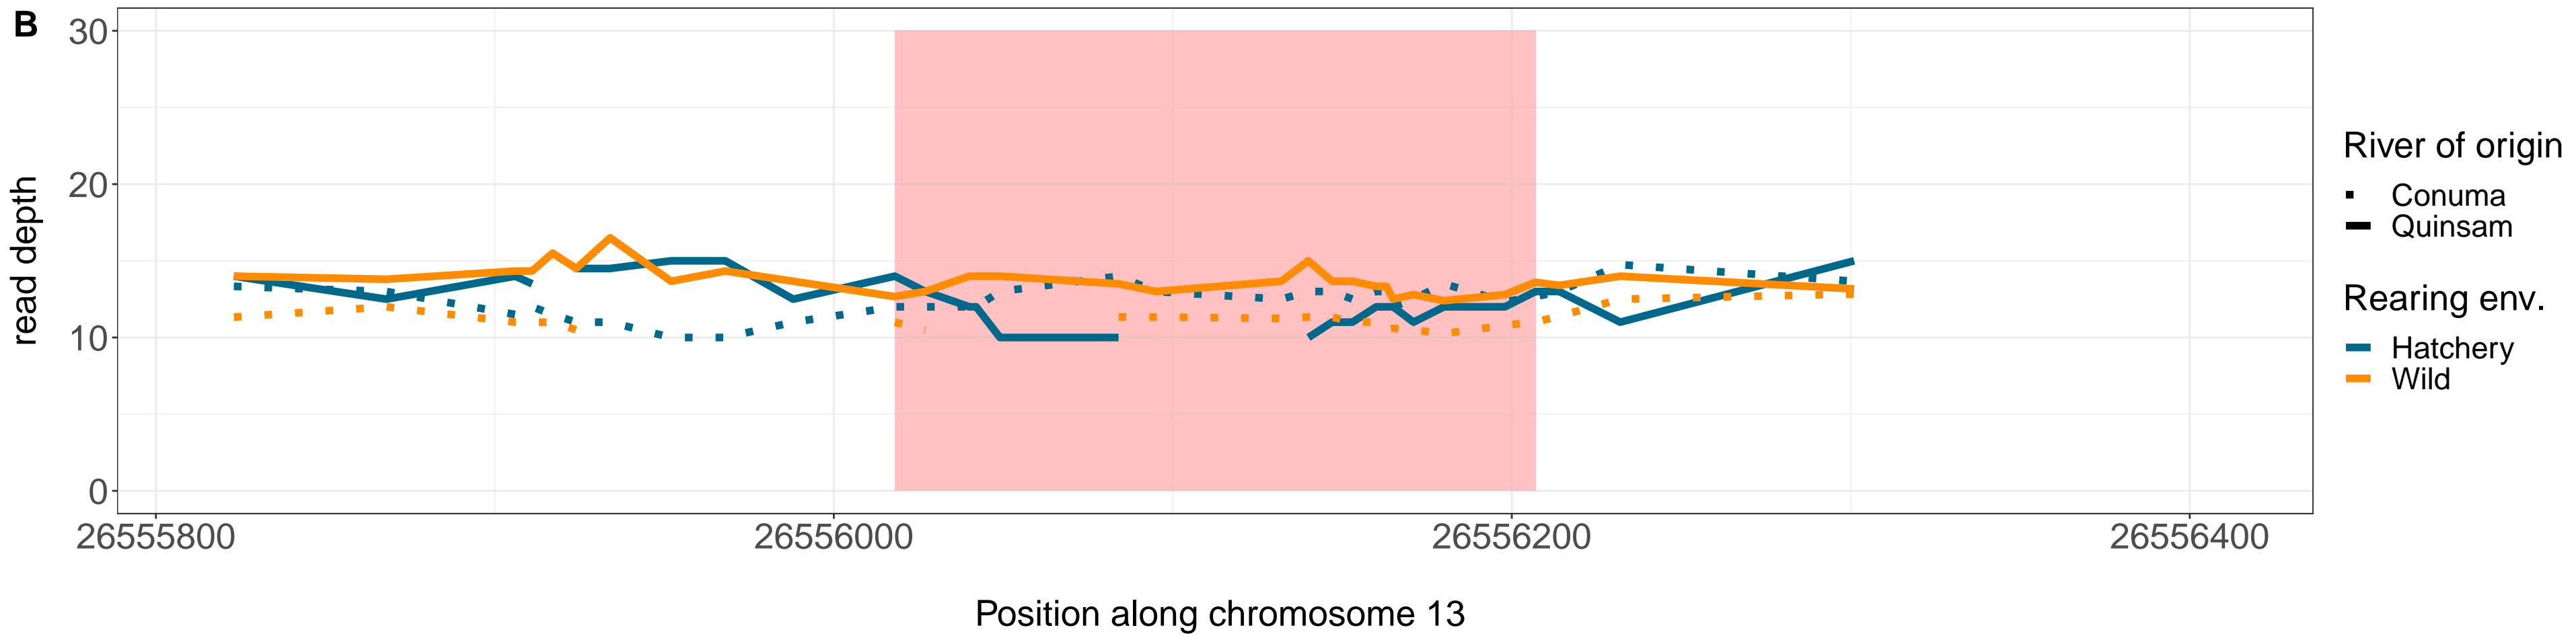



**A**

## DMR\_172

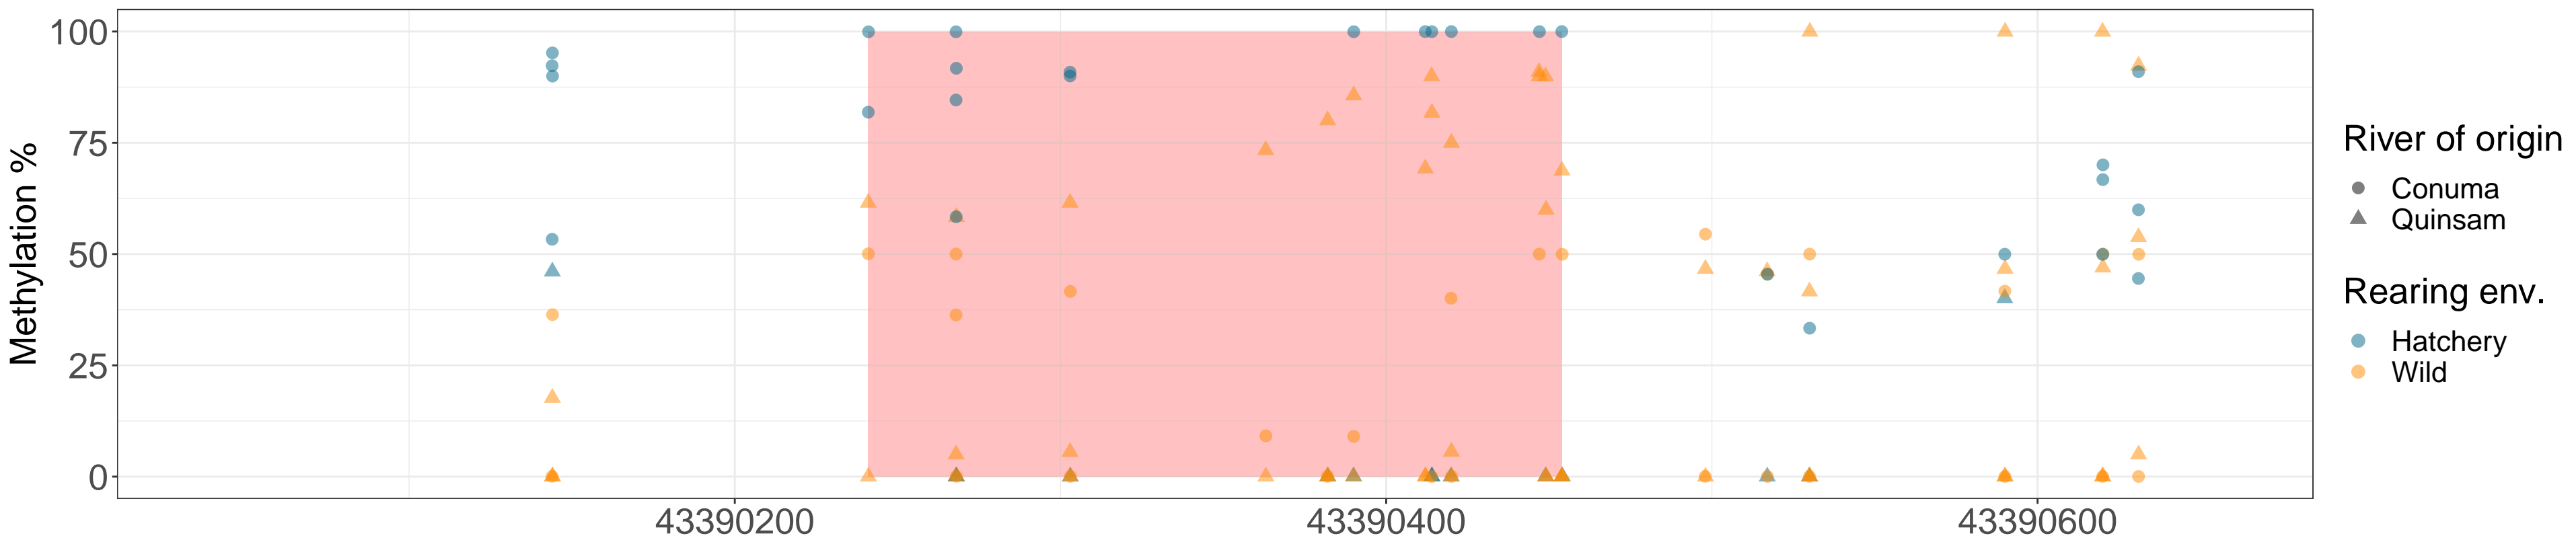**B**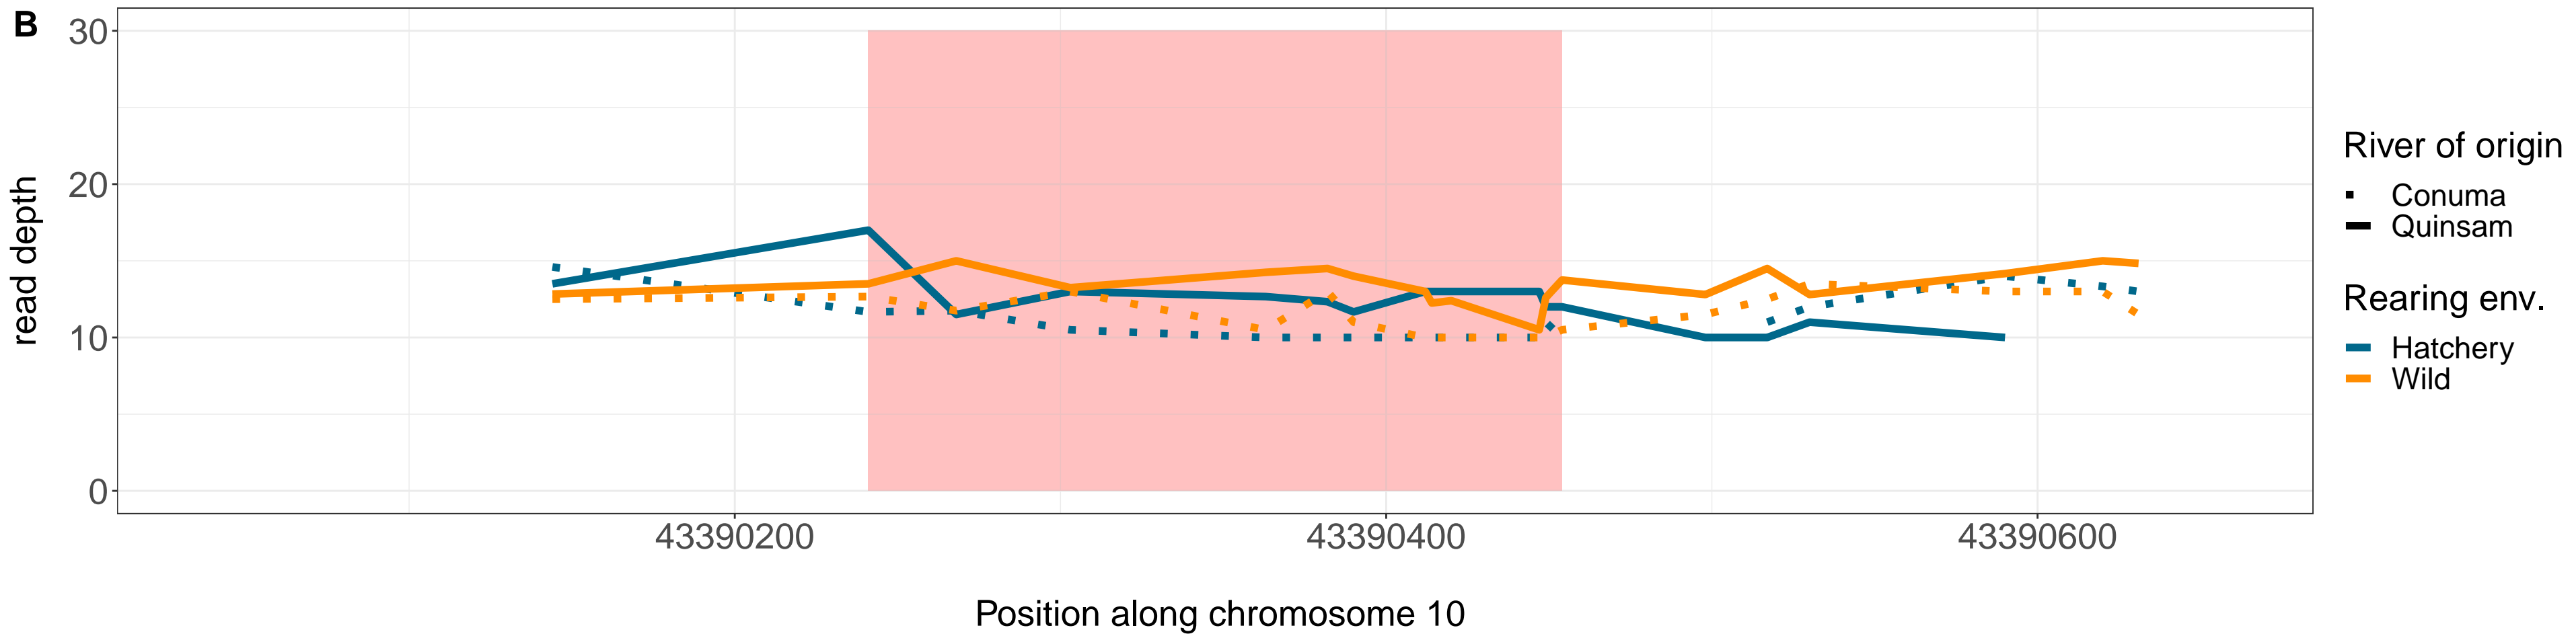

**A**

## DMR\_173

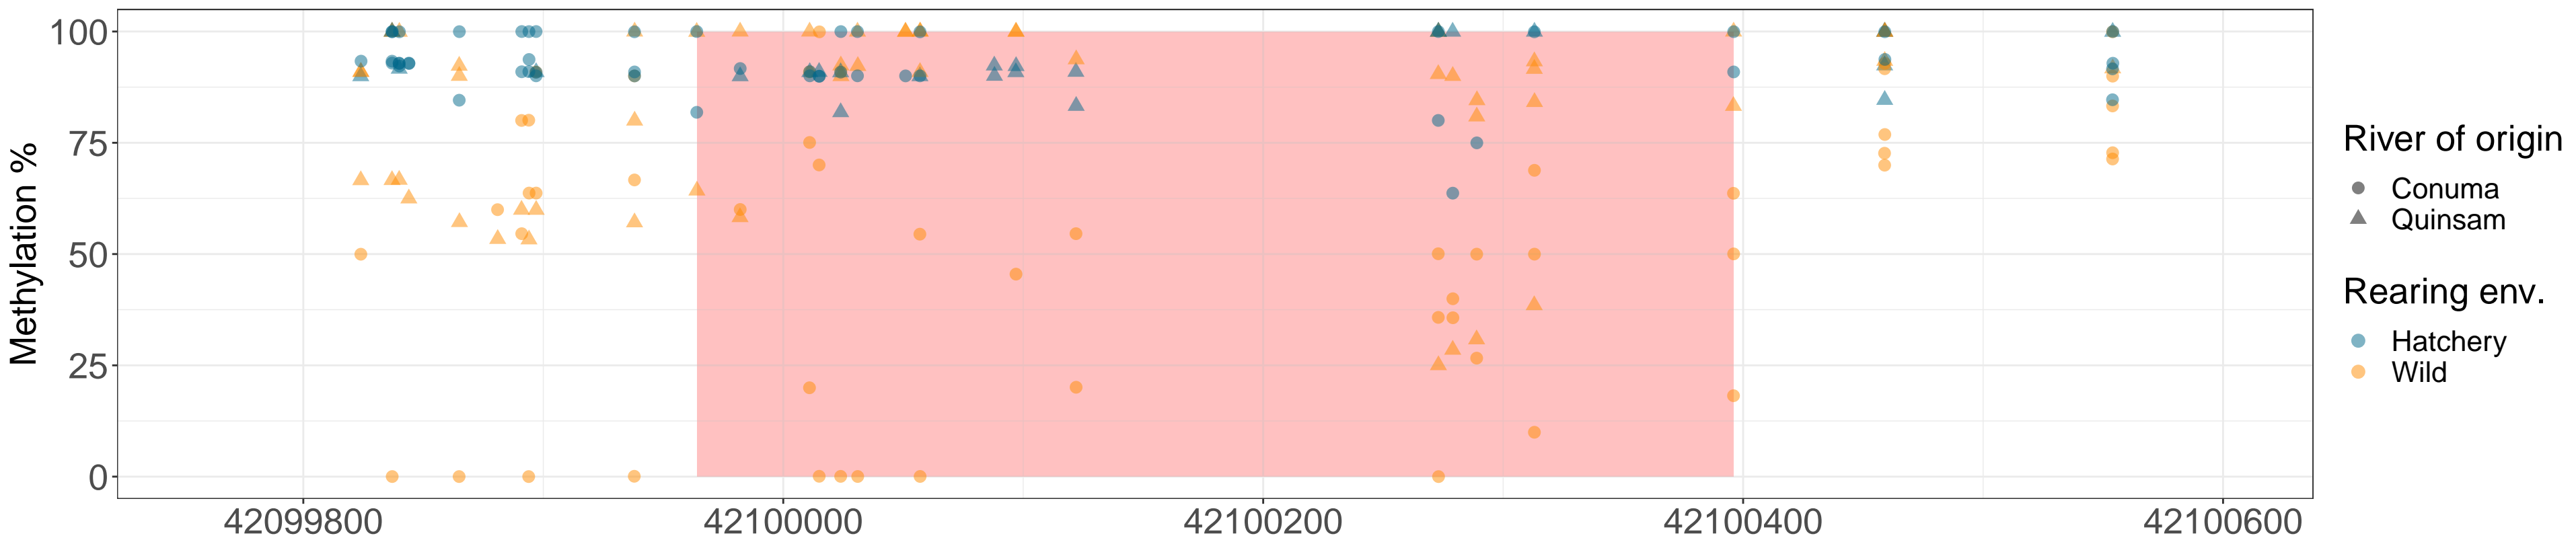**B**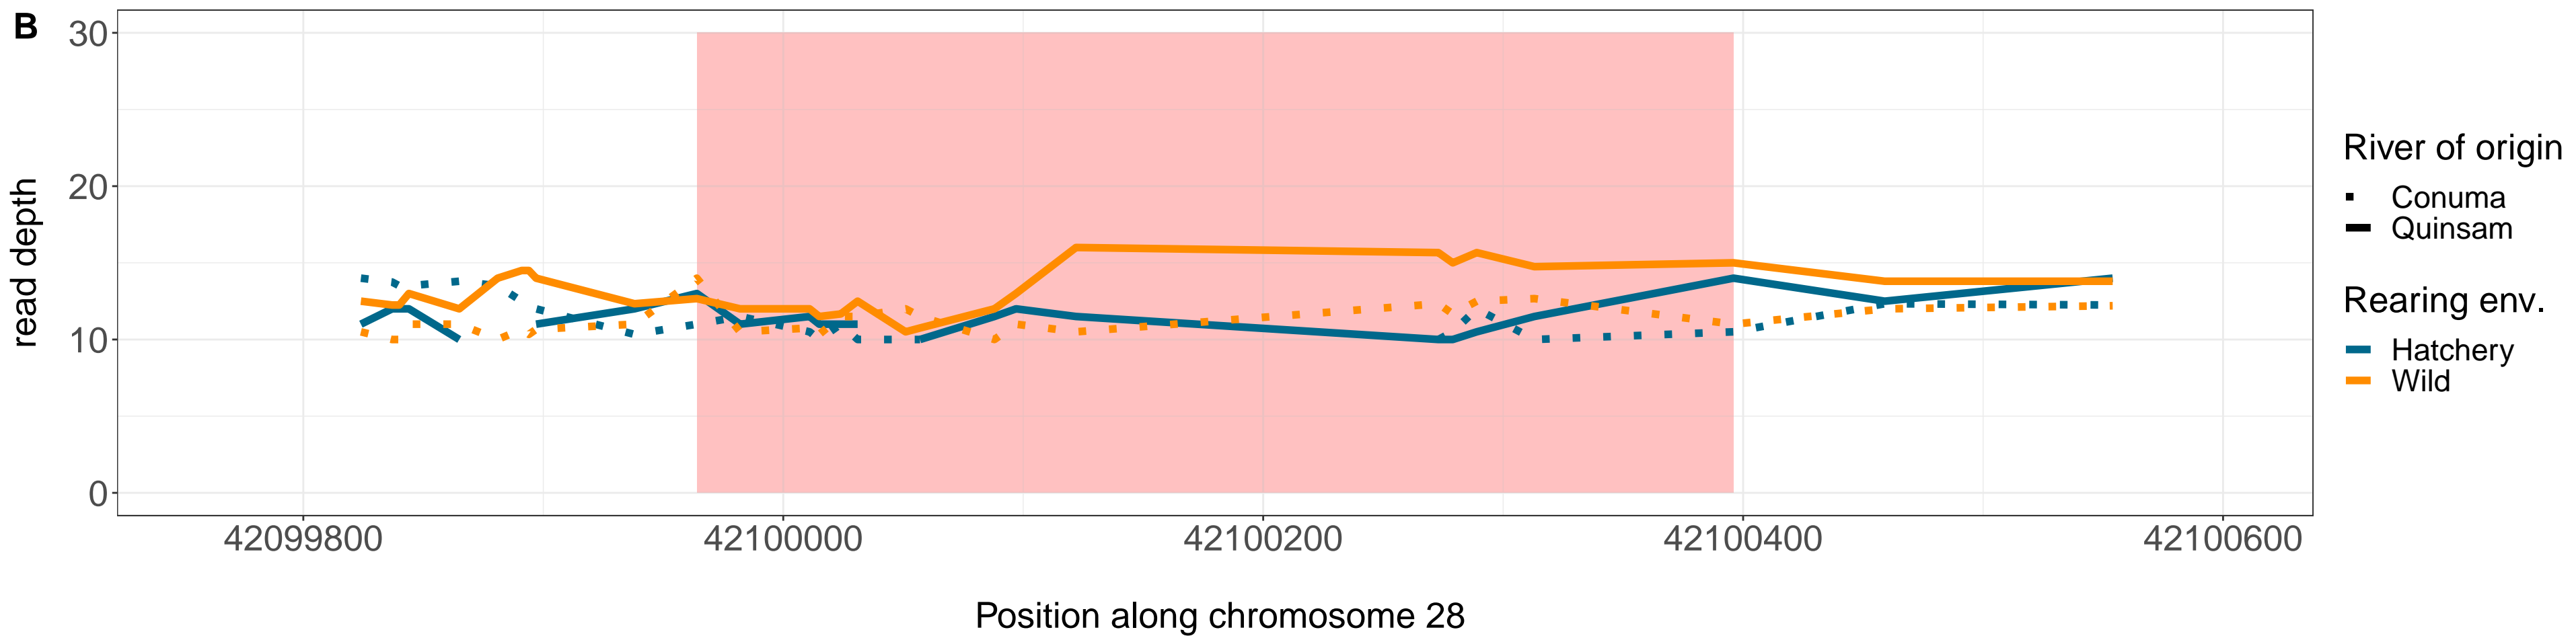

**A**

## DMR\_174

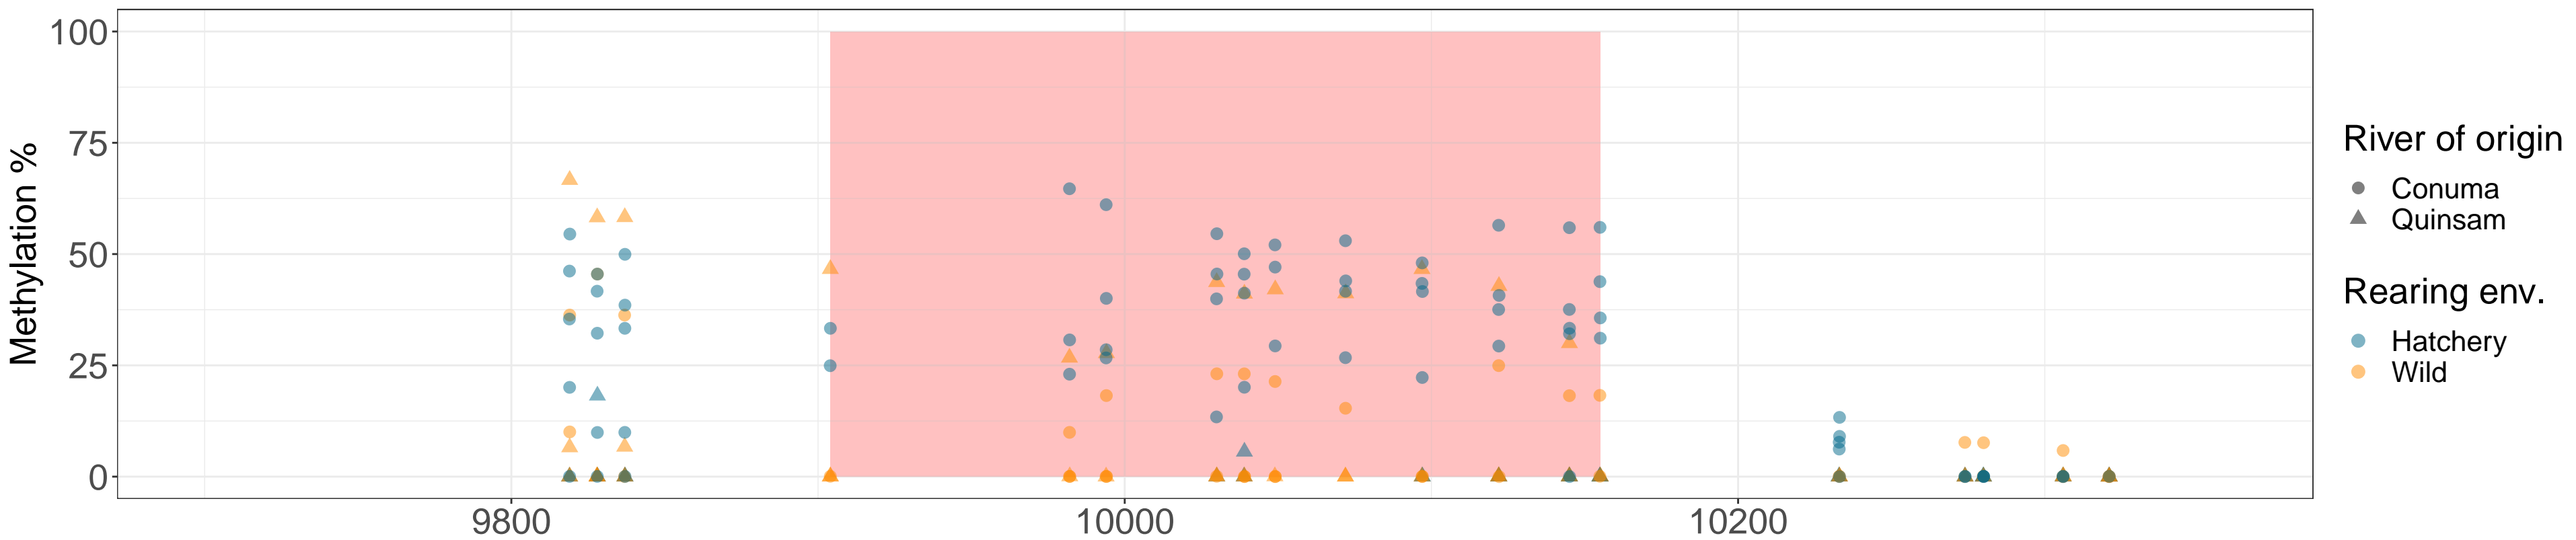**B**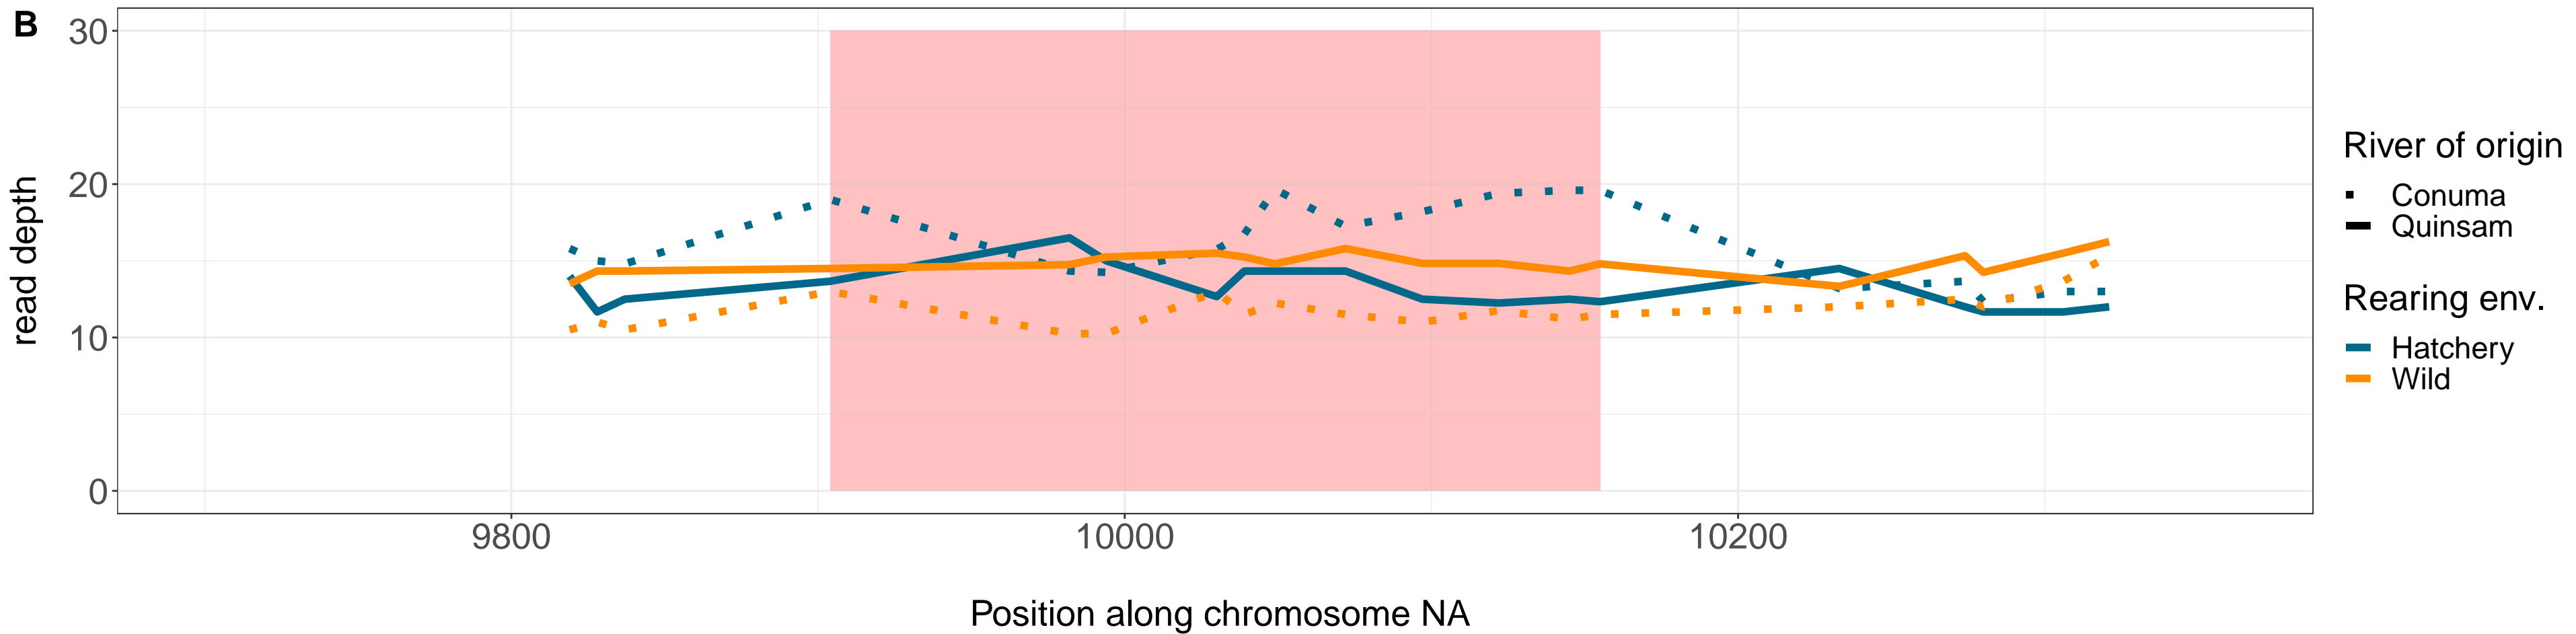

**A**

## DMR\_175

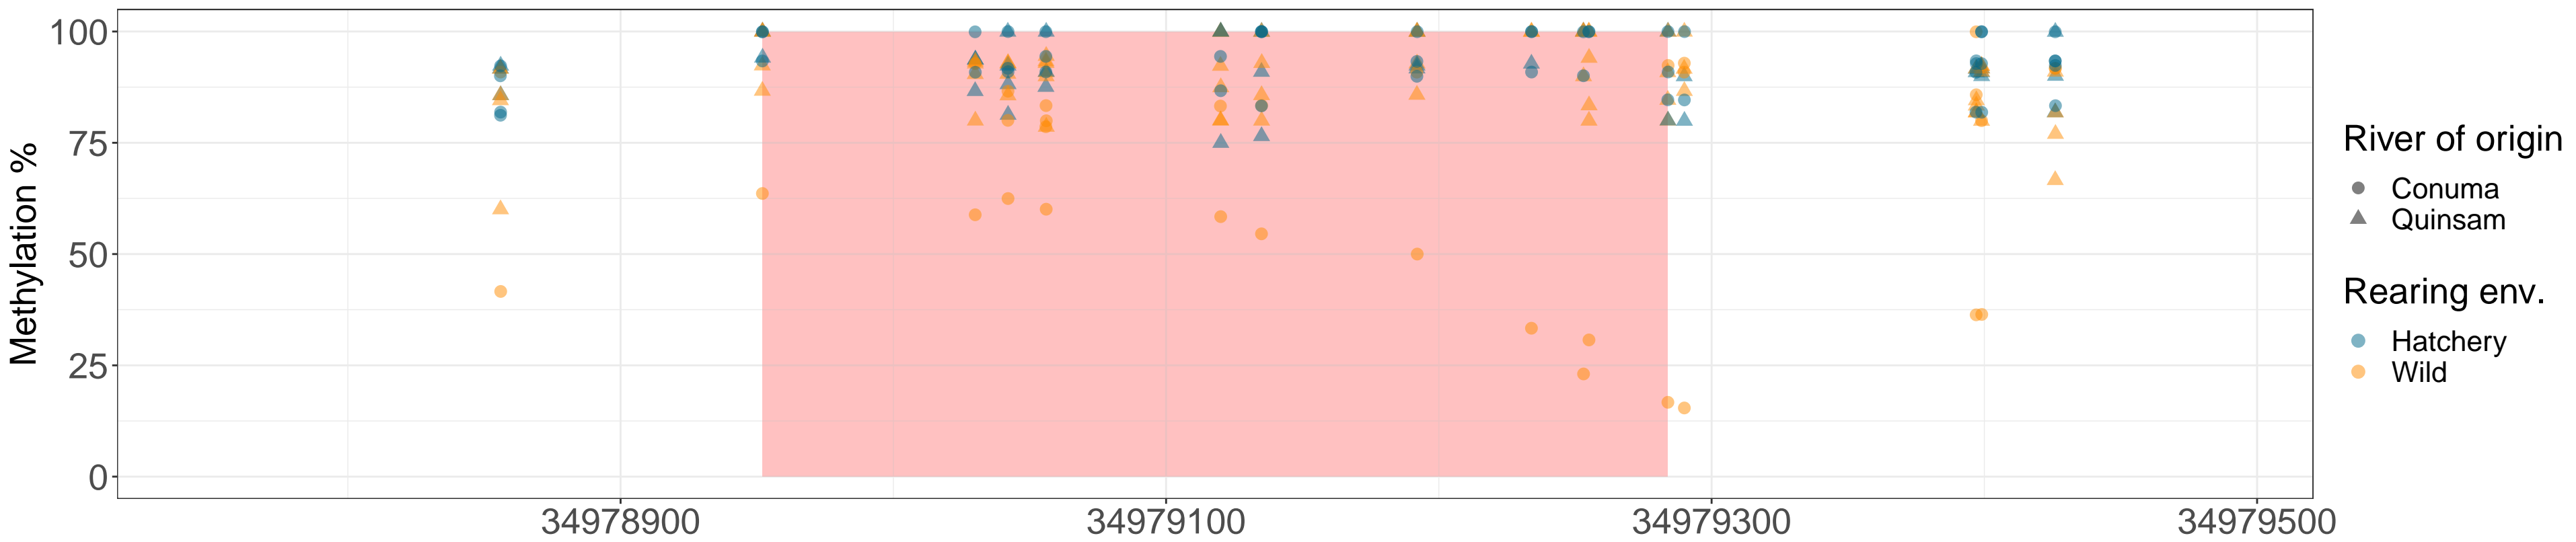**B**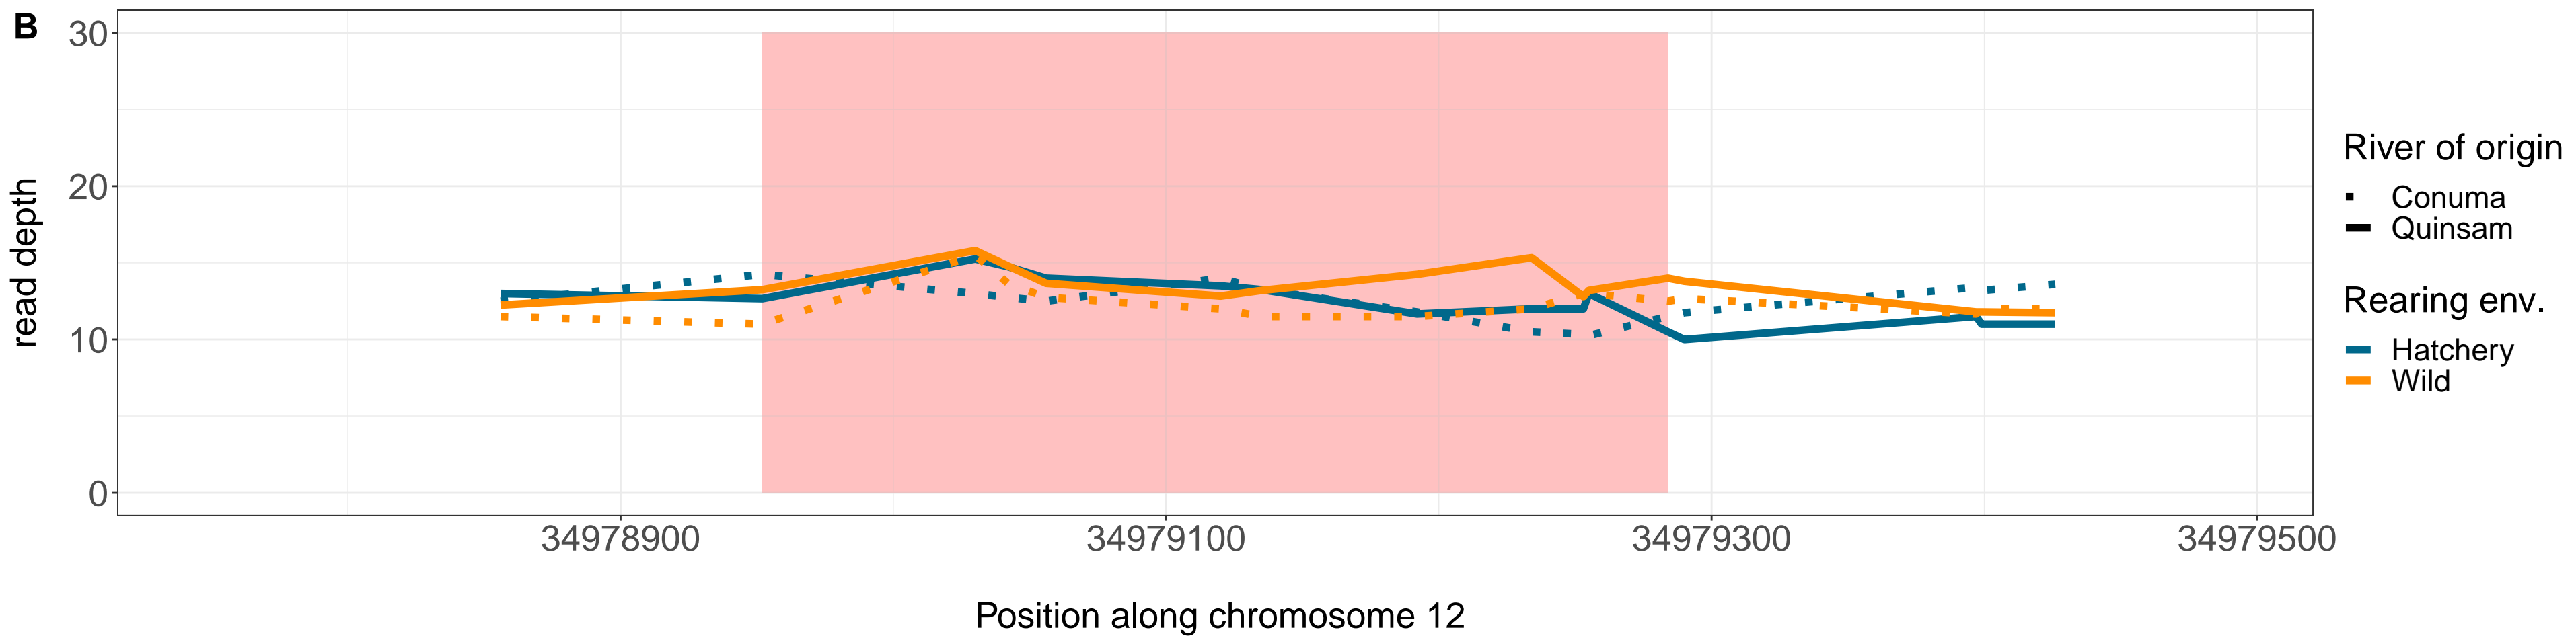

# DMR\_176

XM\_020492041.1

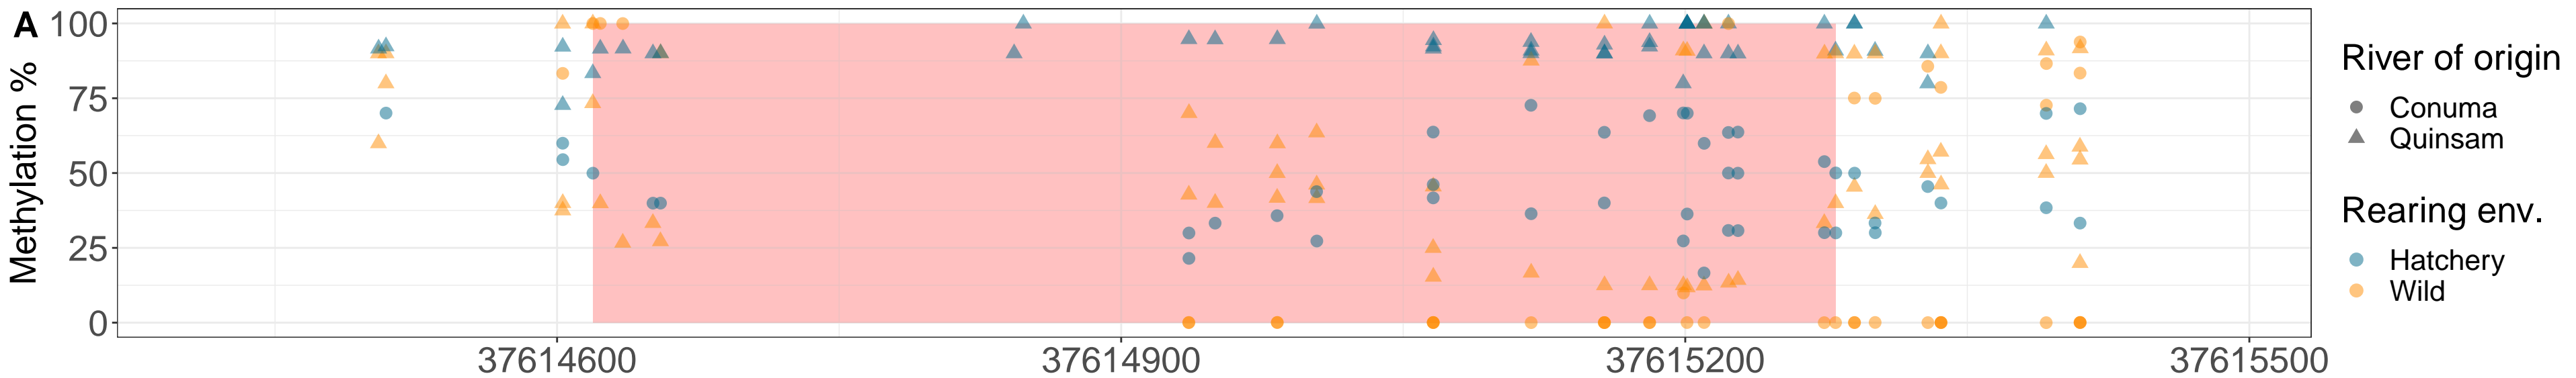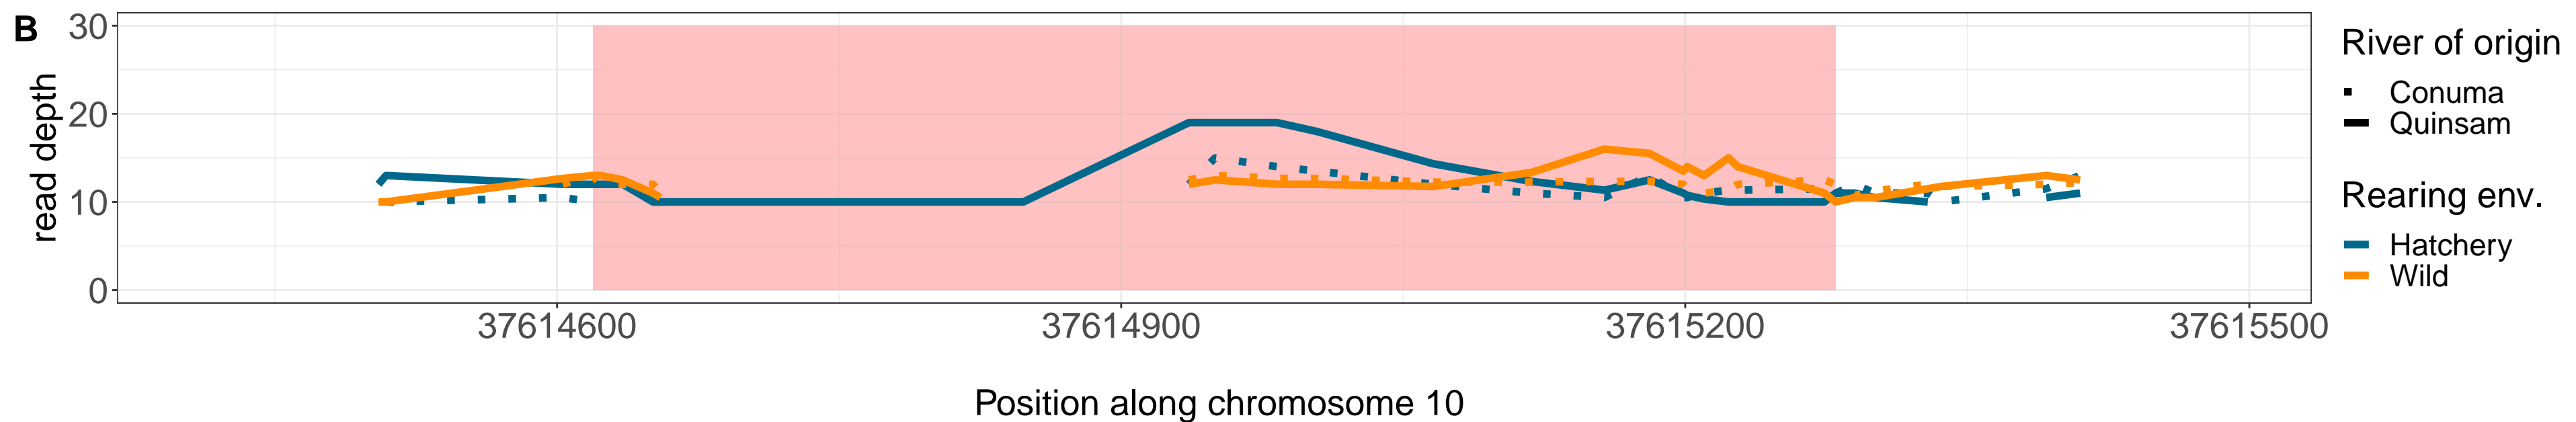

**A**

## DMR\_177

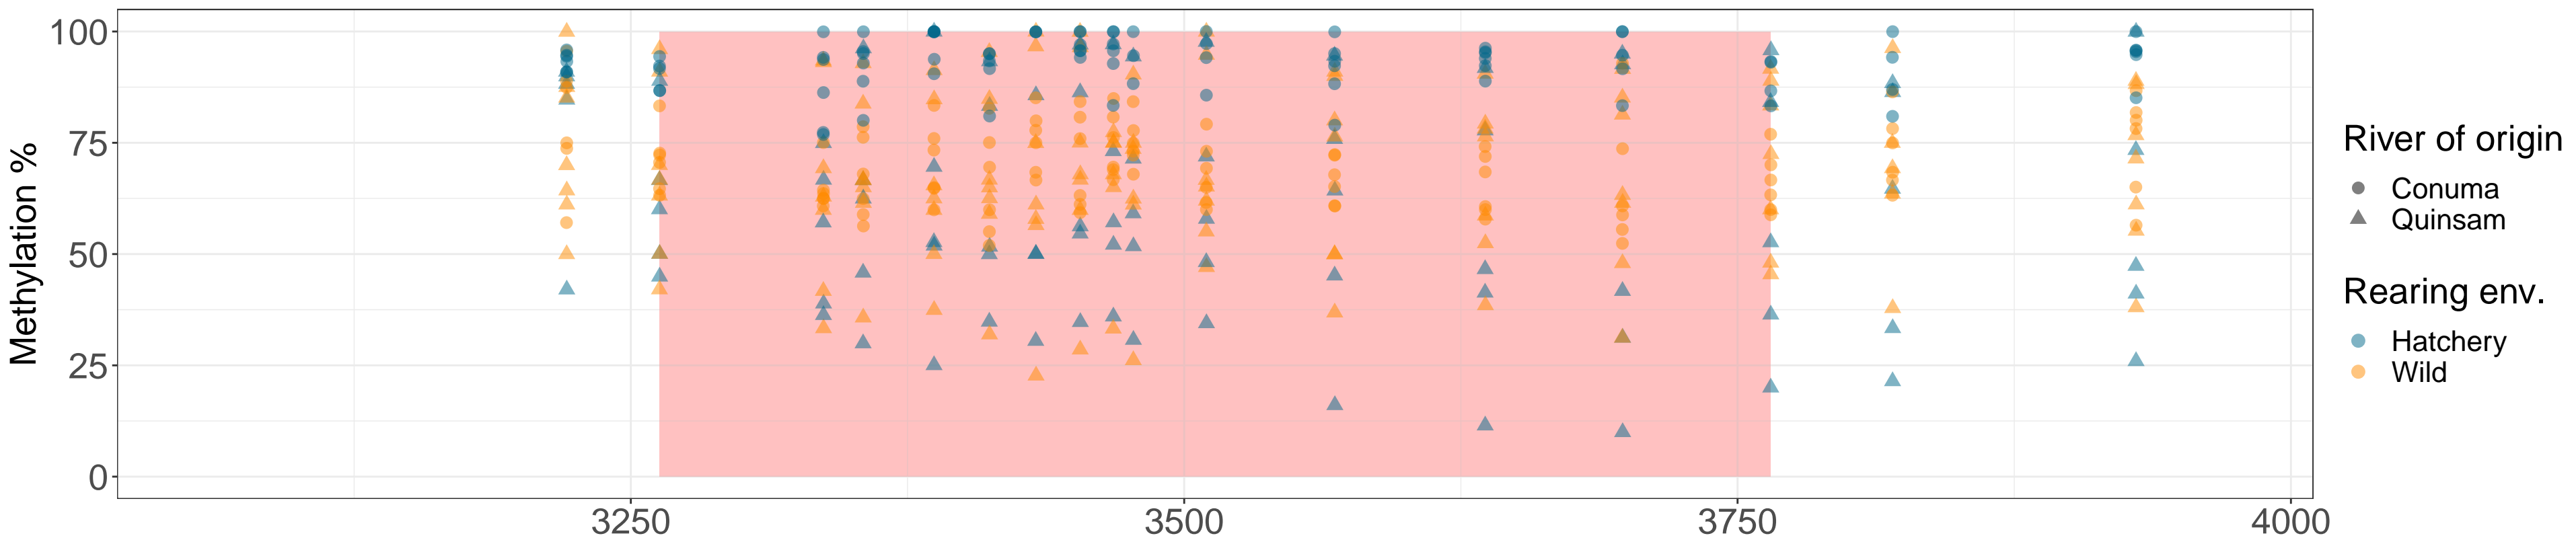**B**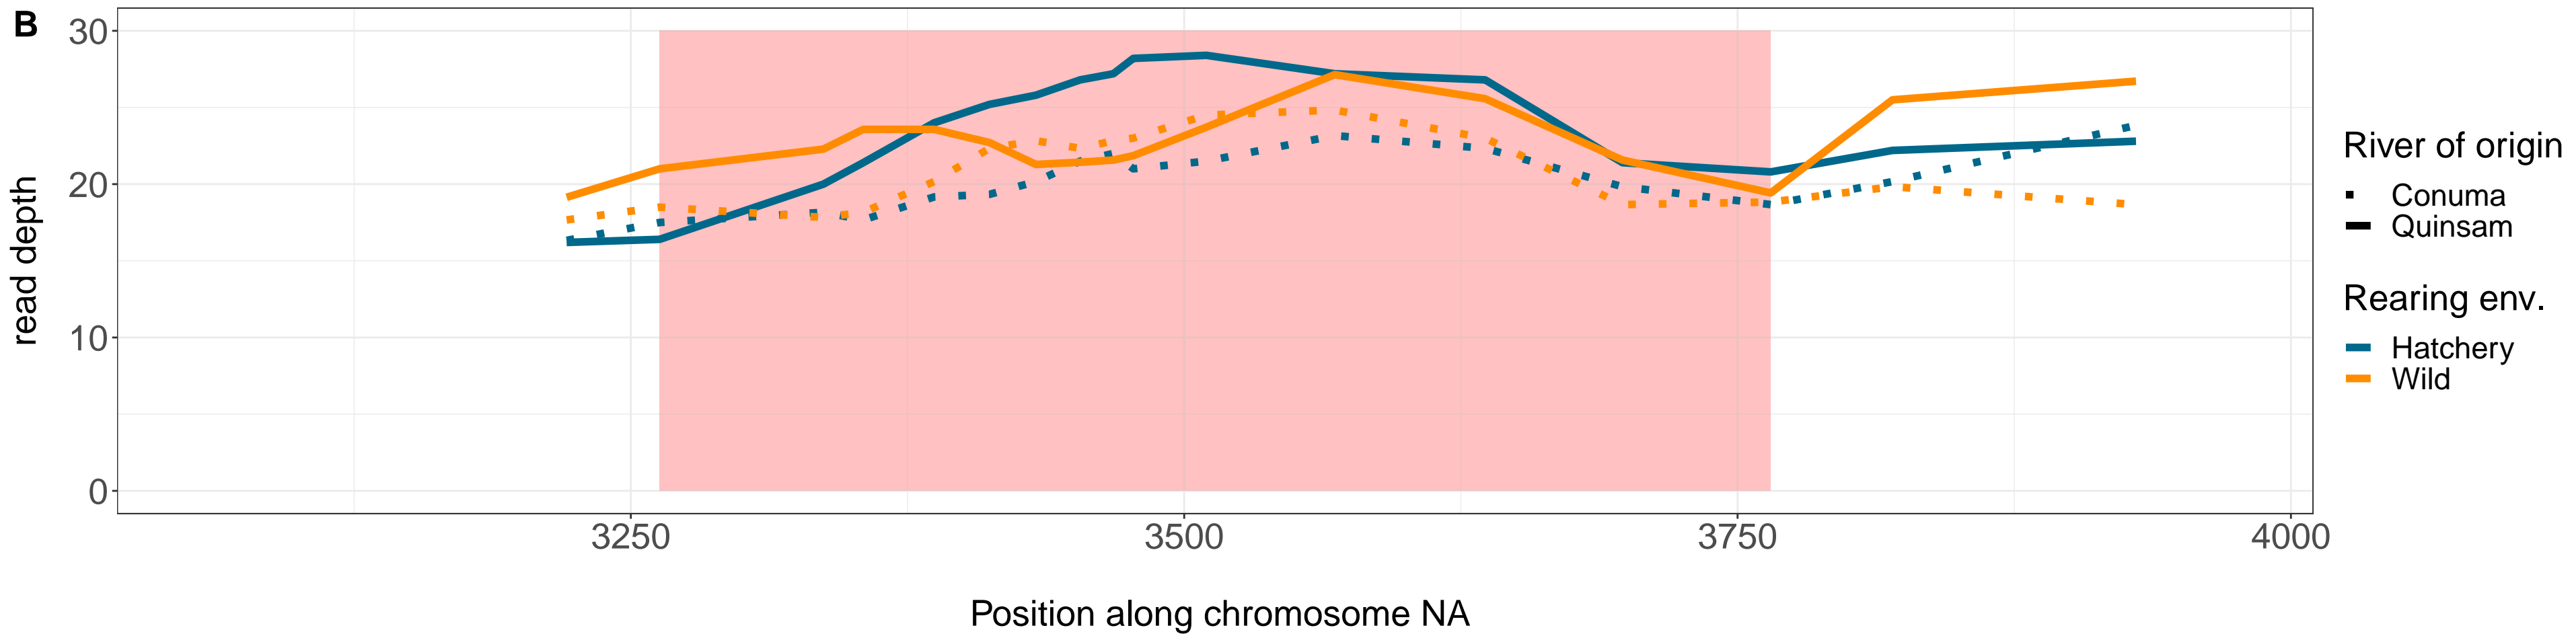

**A**

## DMR\_178

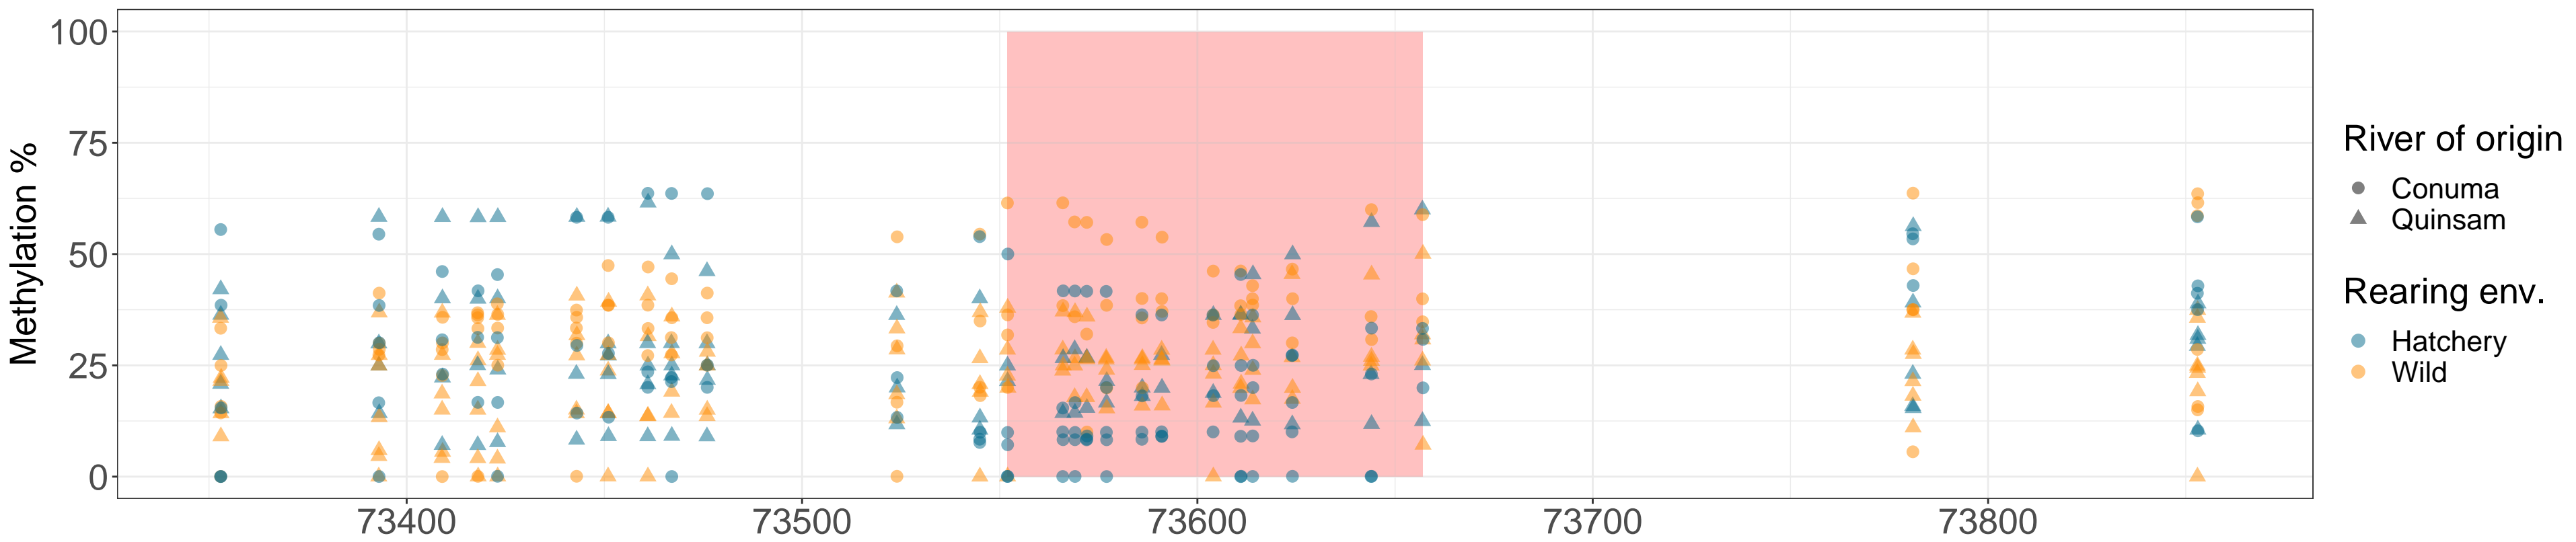**B**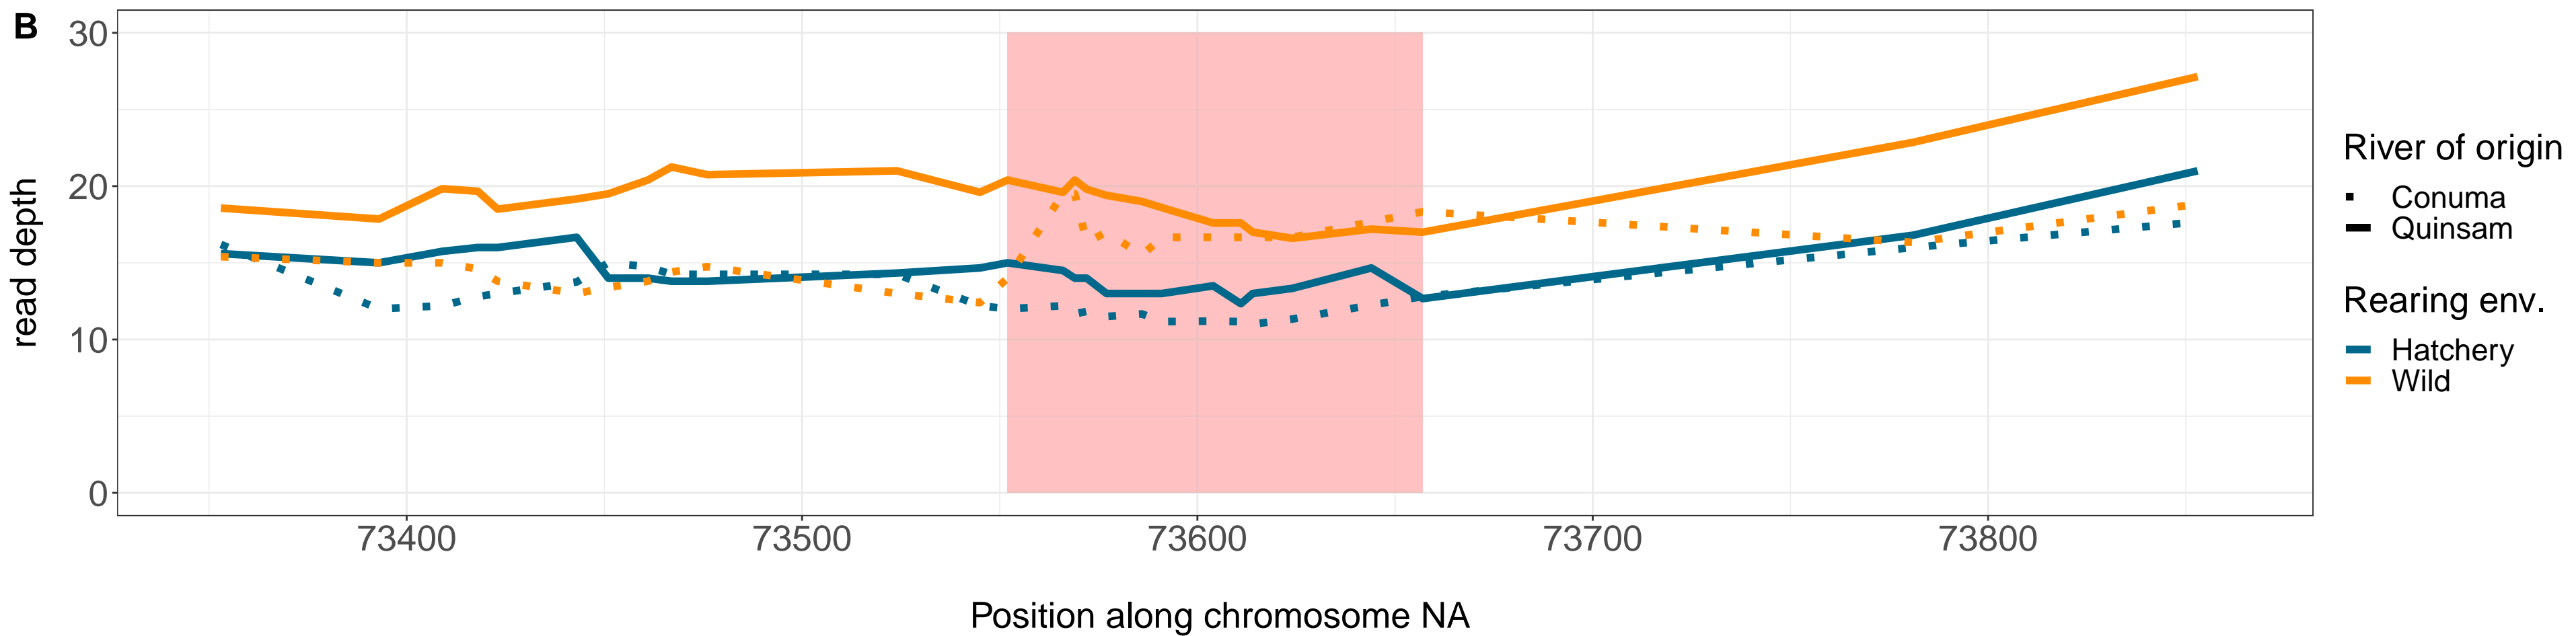

# DMR\_179

XM\_020464133.1

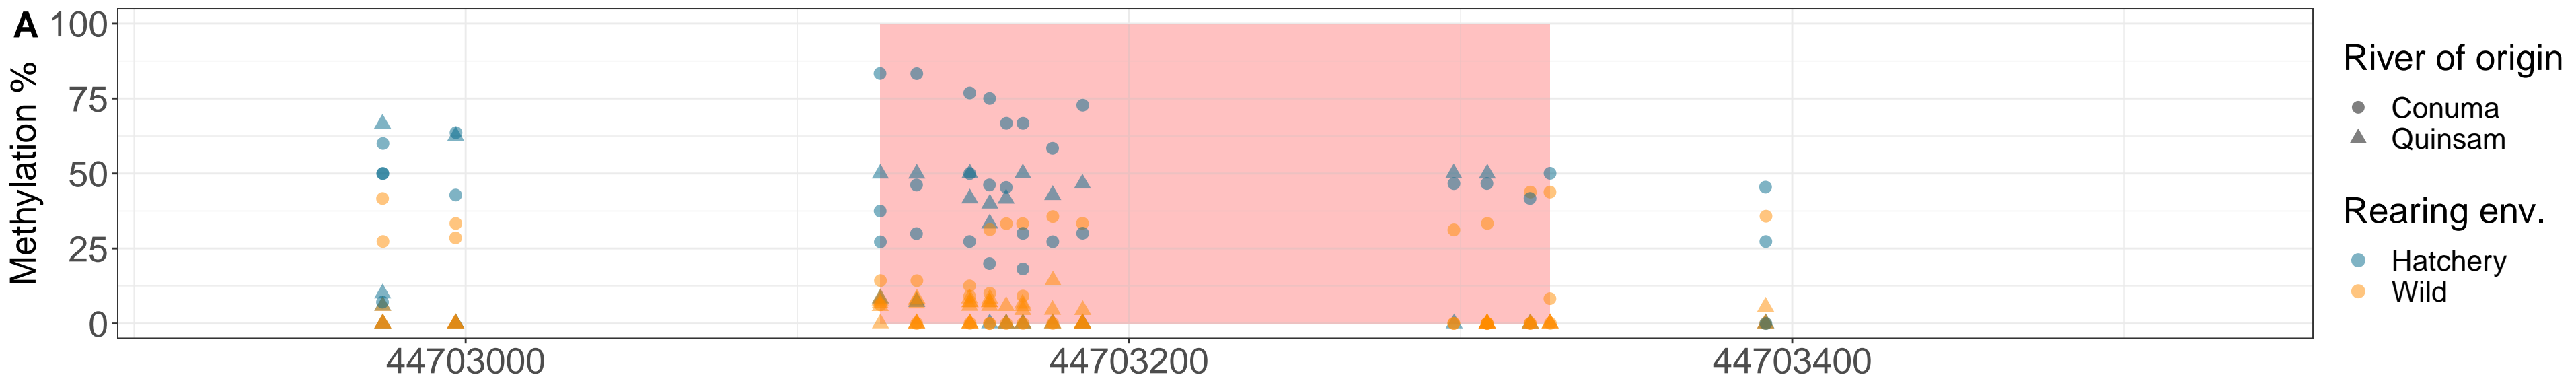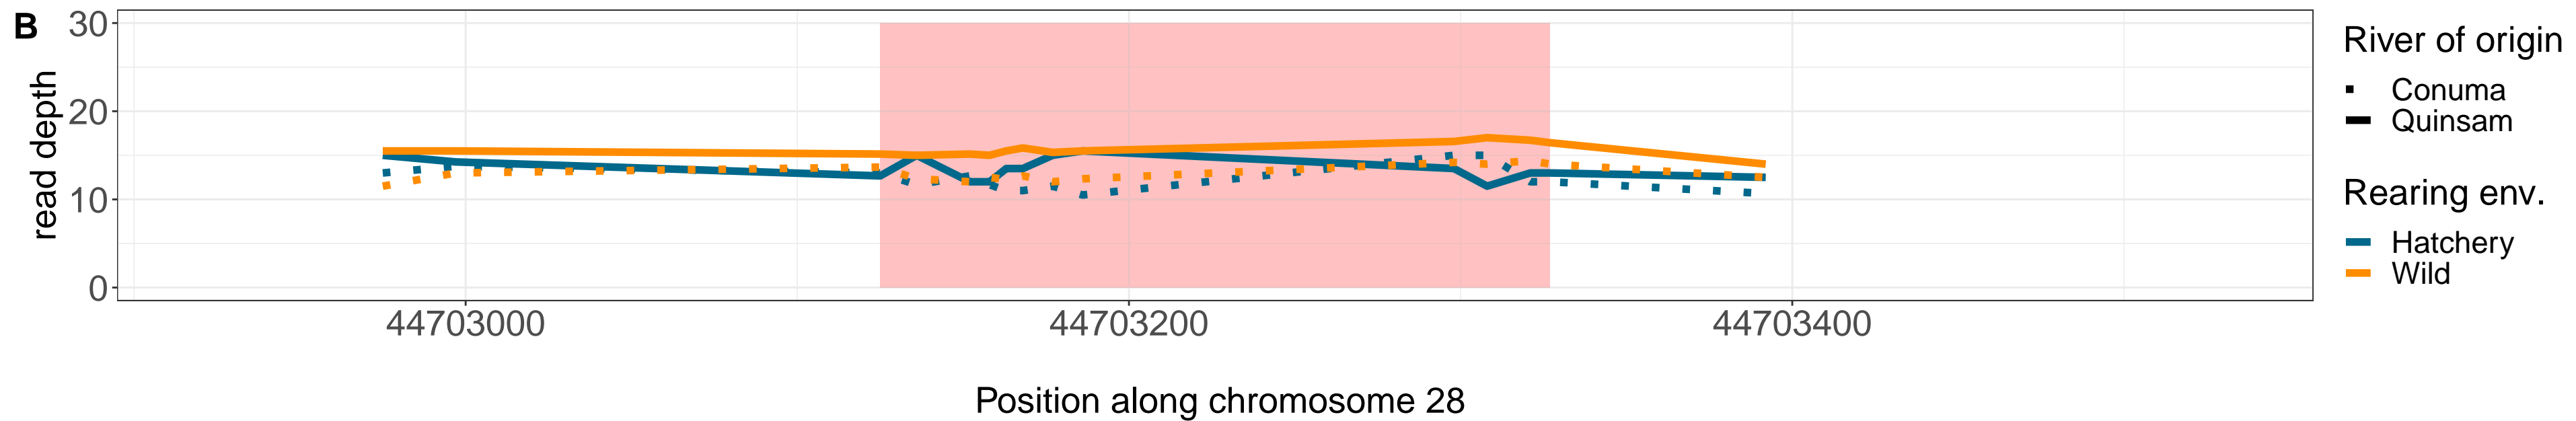



**A**

## DMR\_181

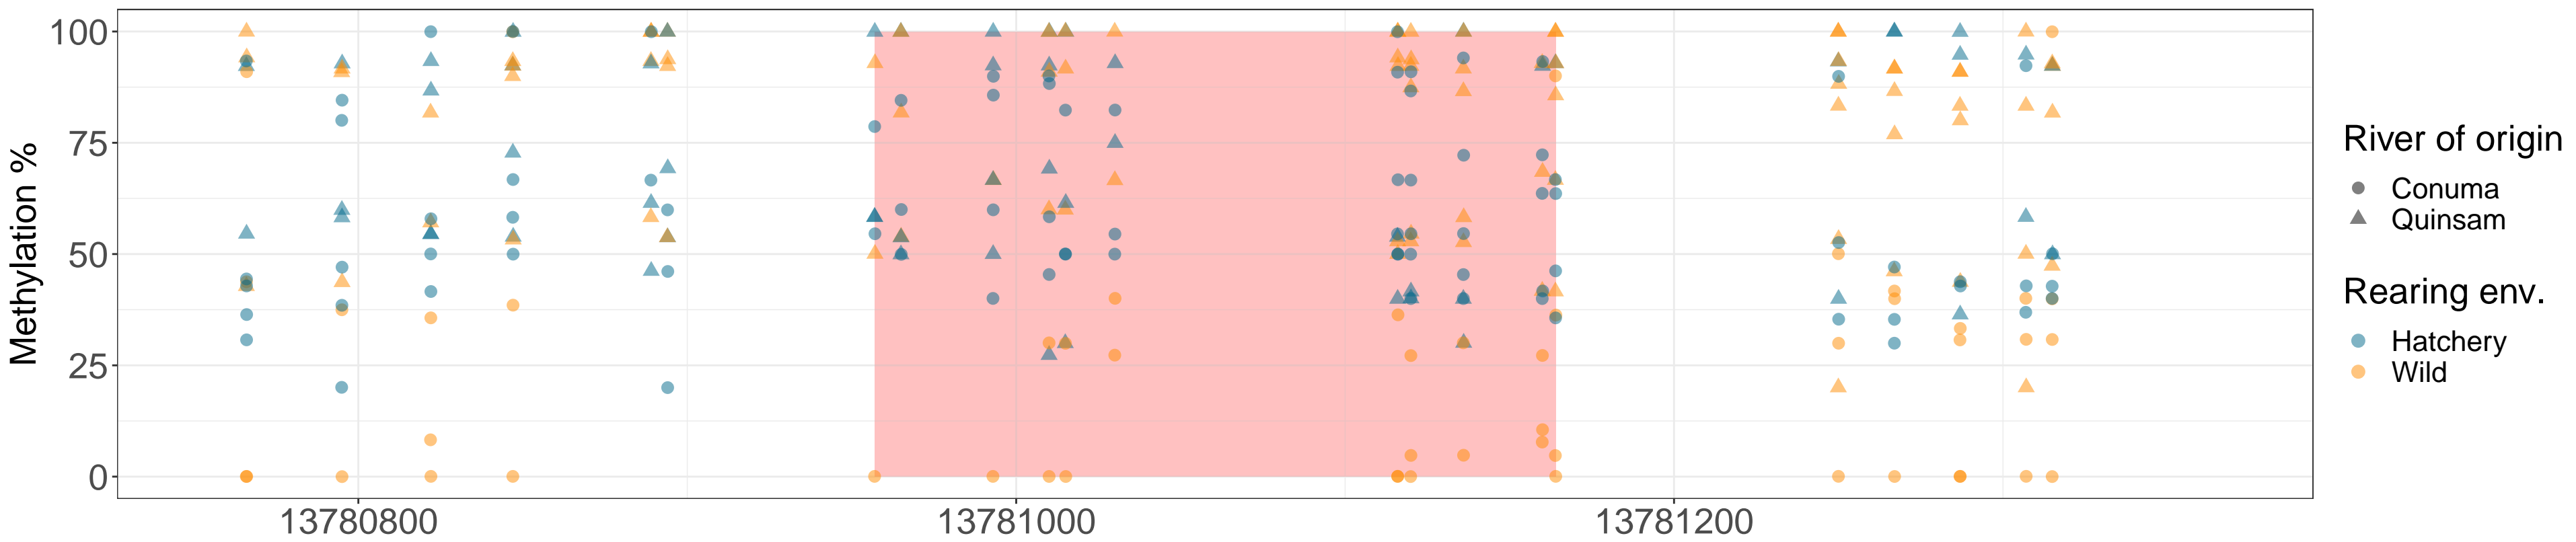**B**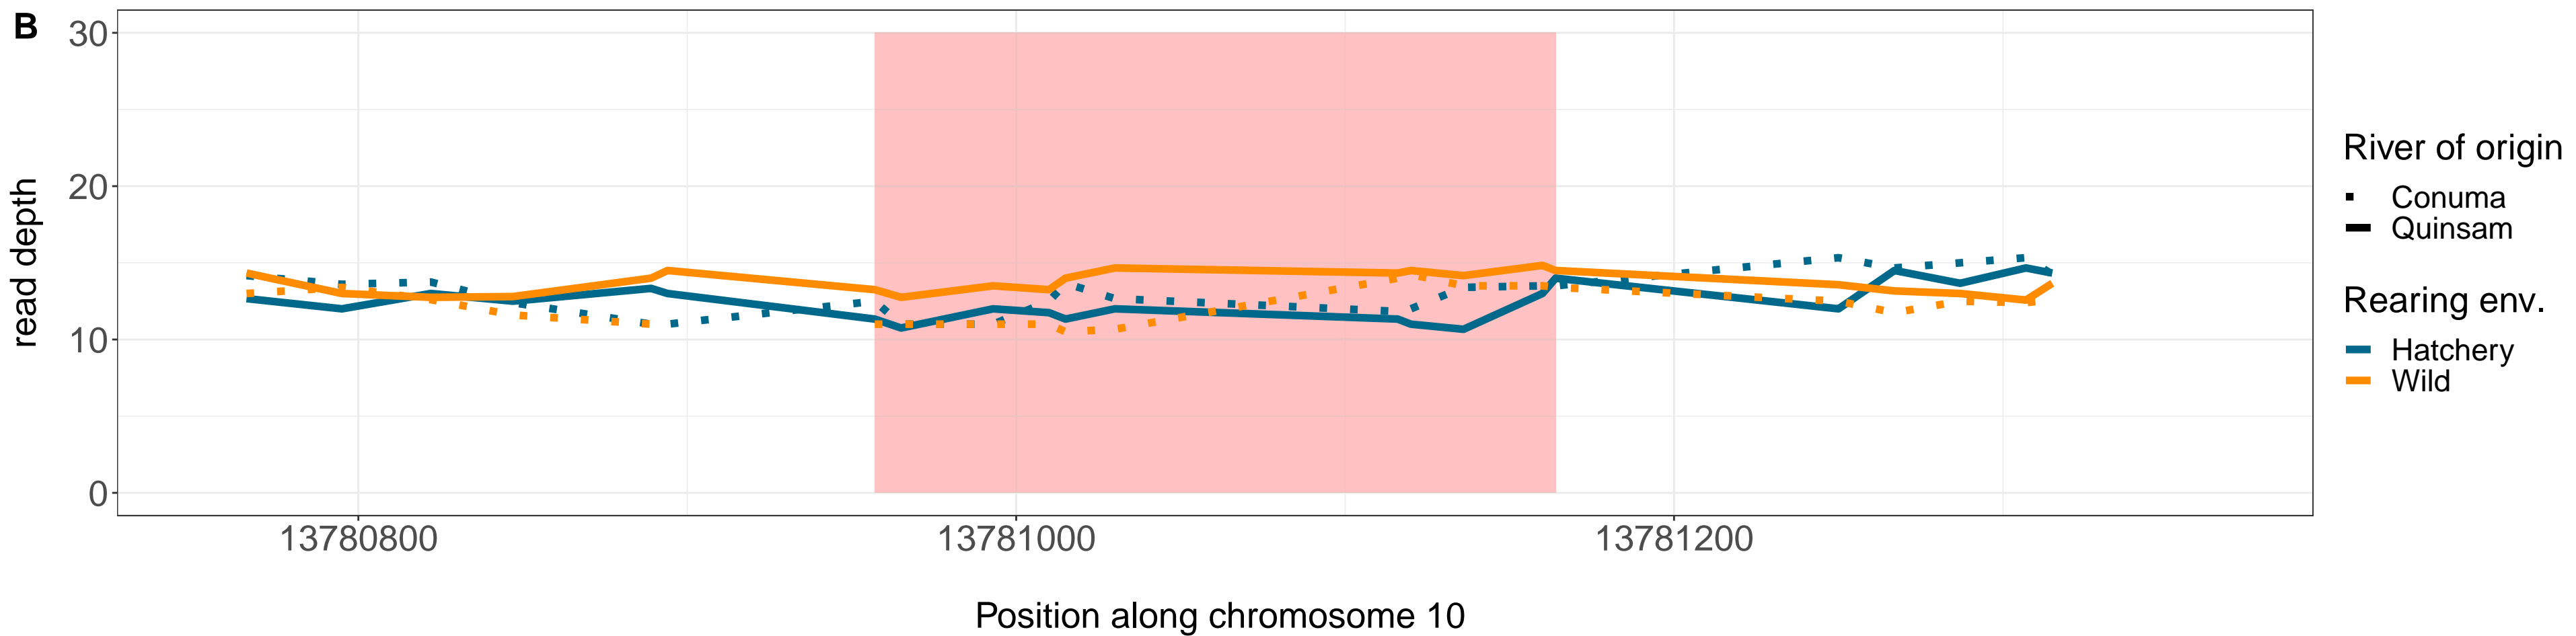

**A**

## DMR\_182

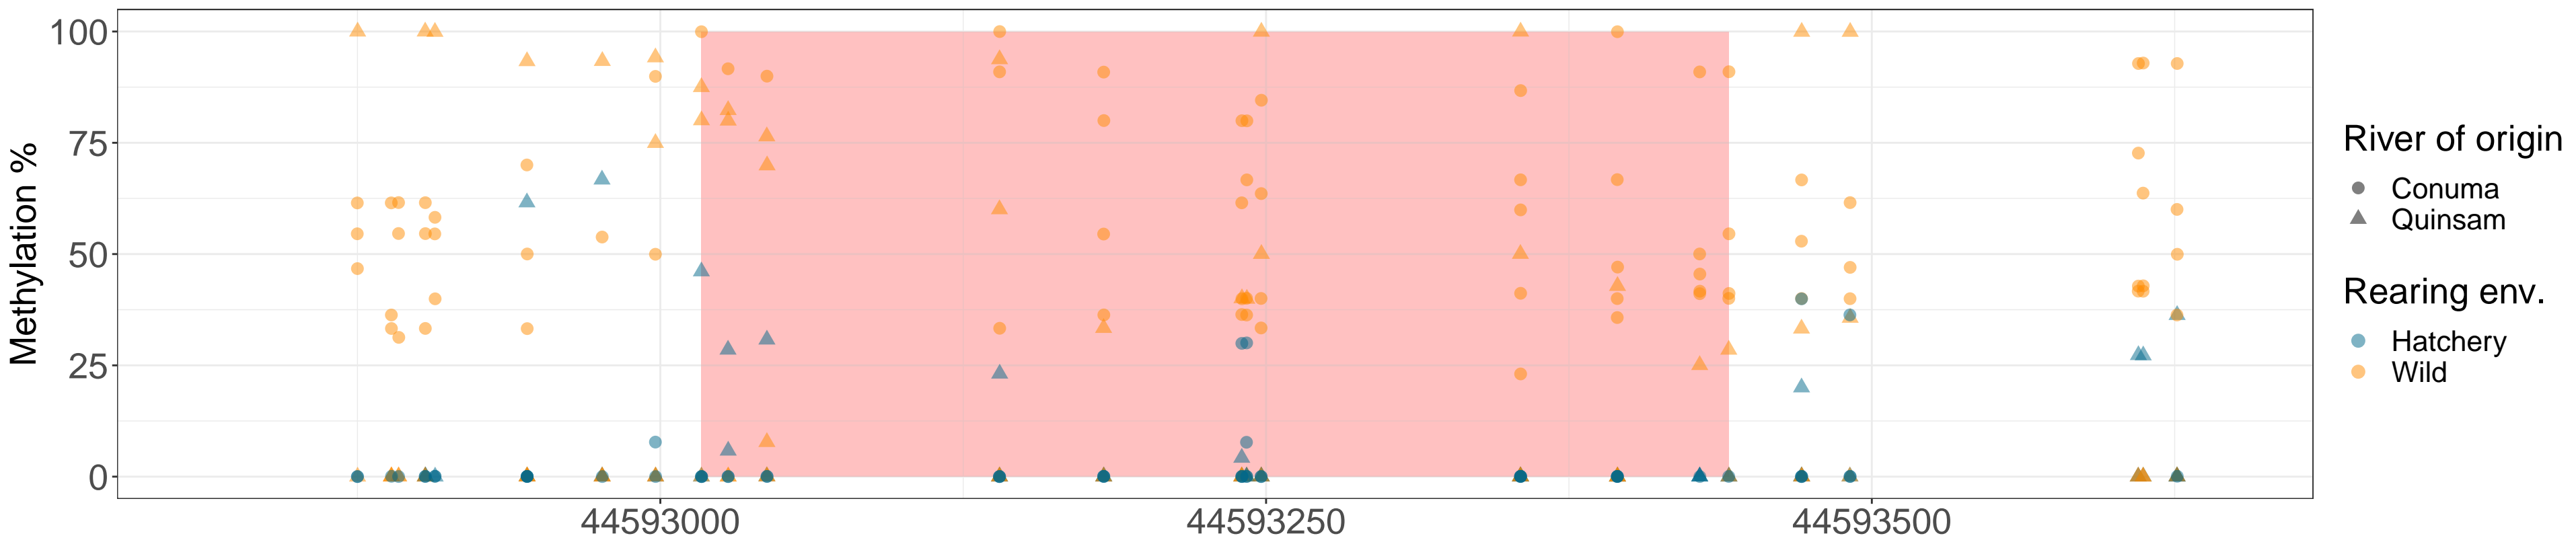**B**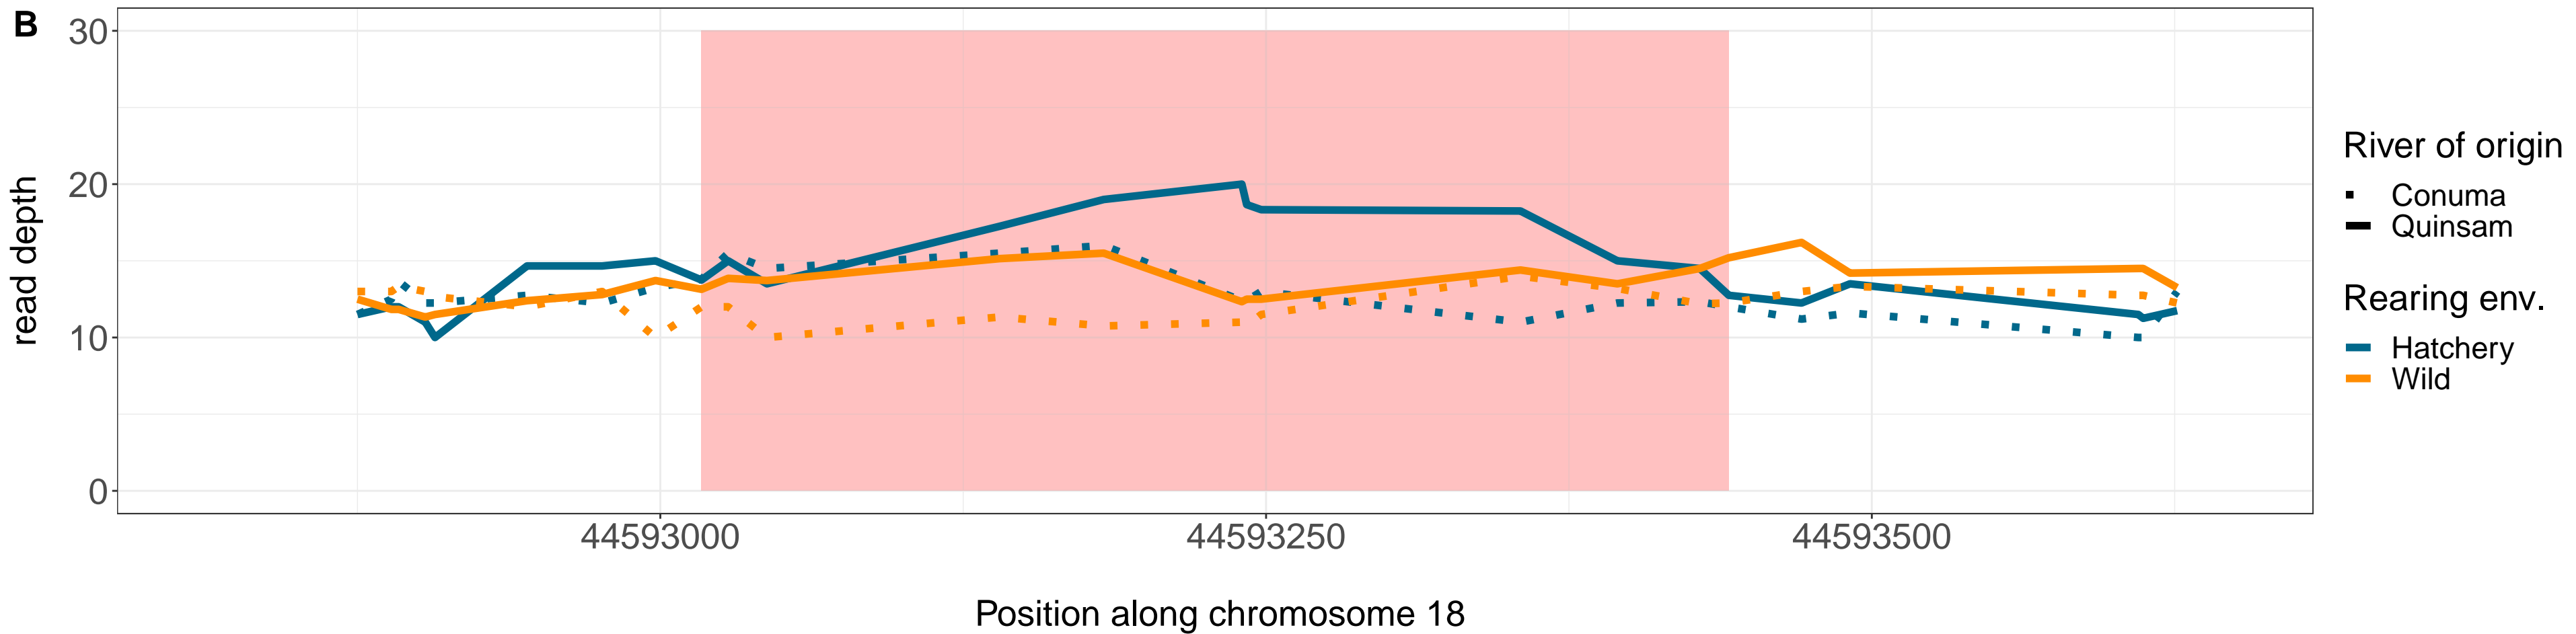

# DMR\_183

XM\_020501880.1

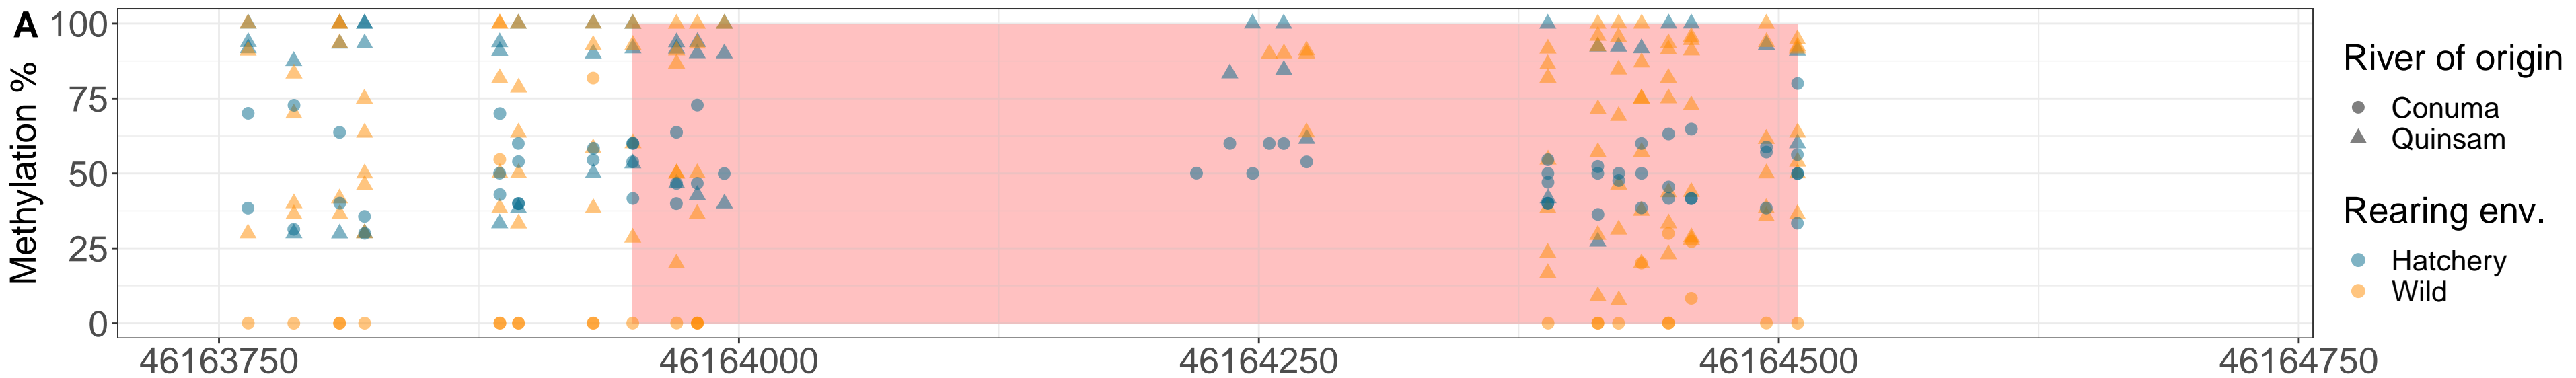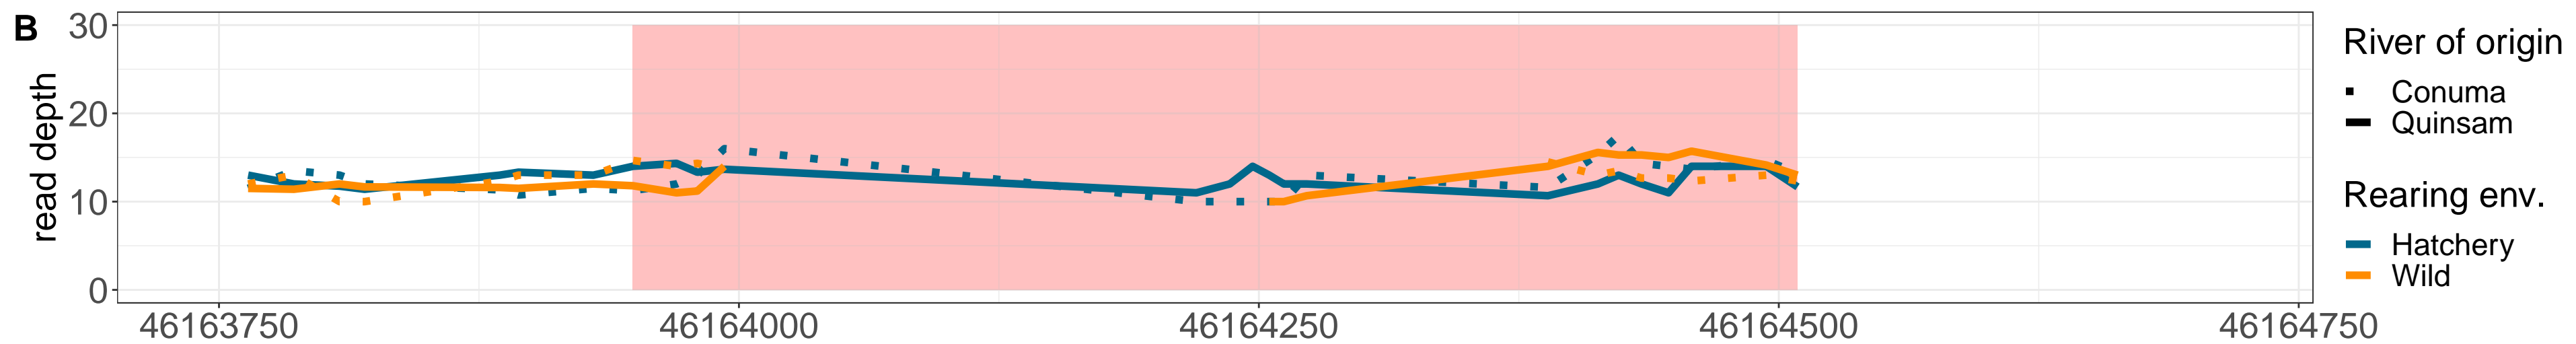

Position along chromosome 15

**A**

## DMR\_185

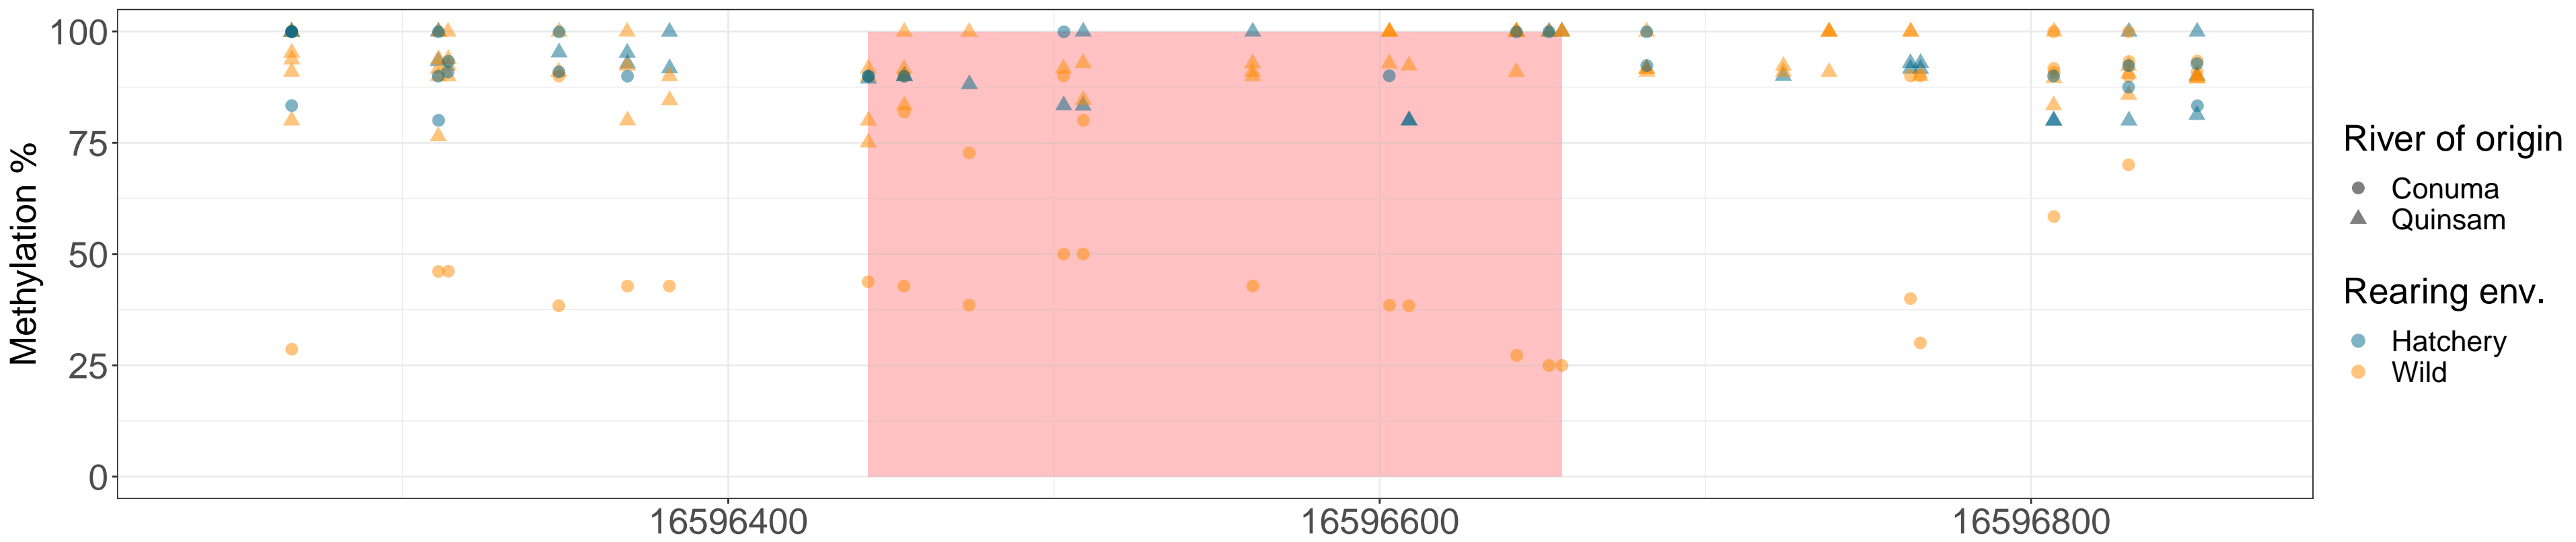**B**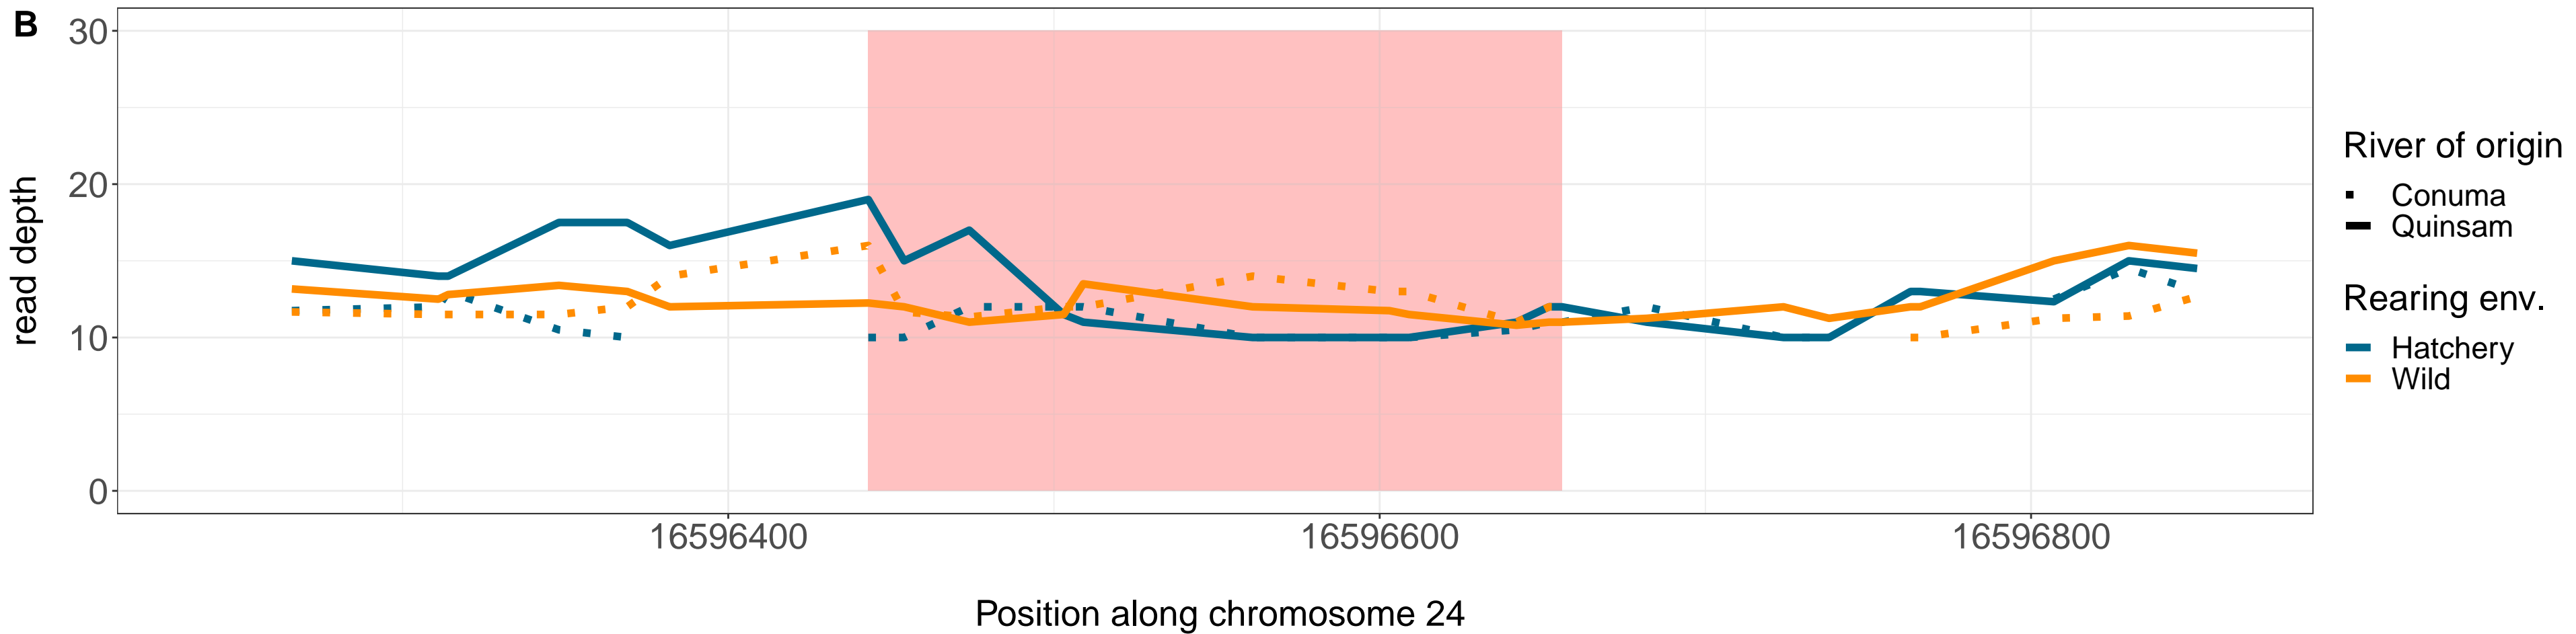

**A**

## DMR\_186

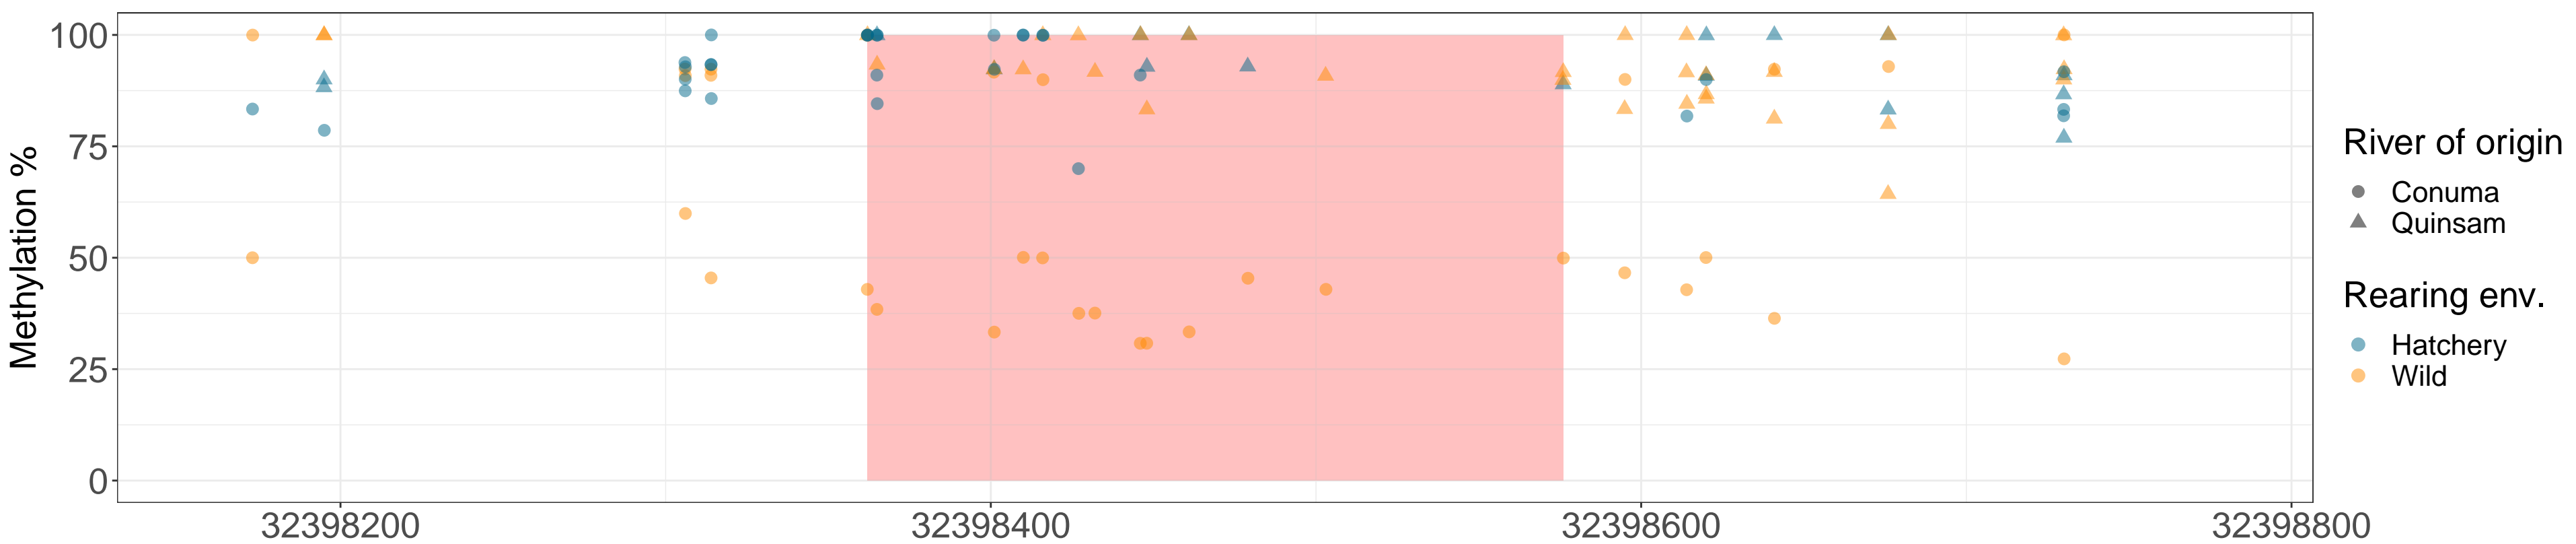**B**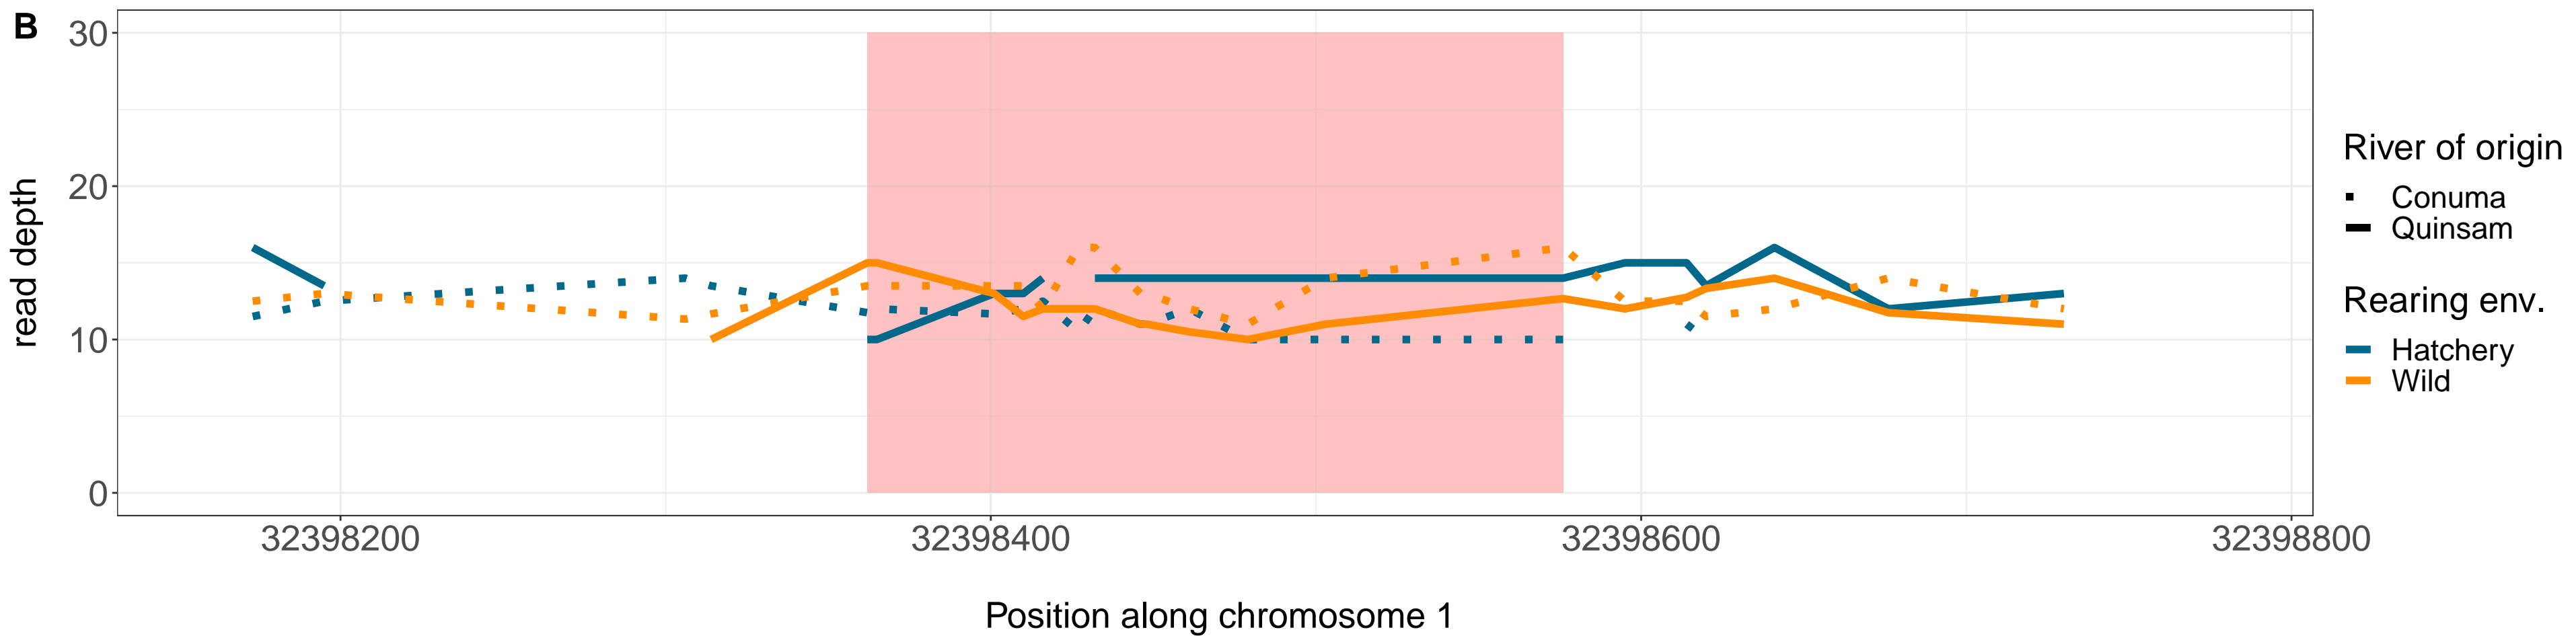

# DMR\_187

XM\_020476394.1

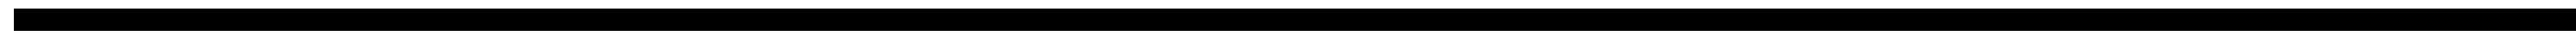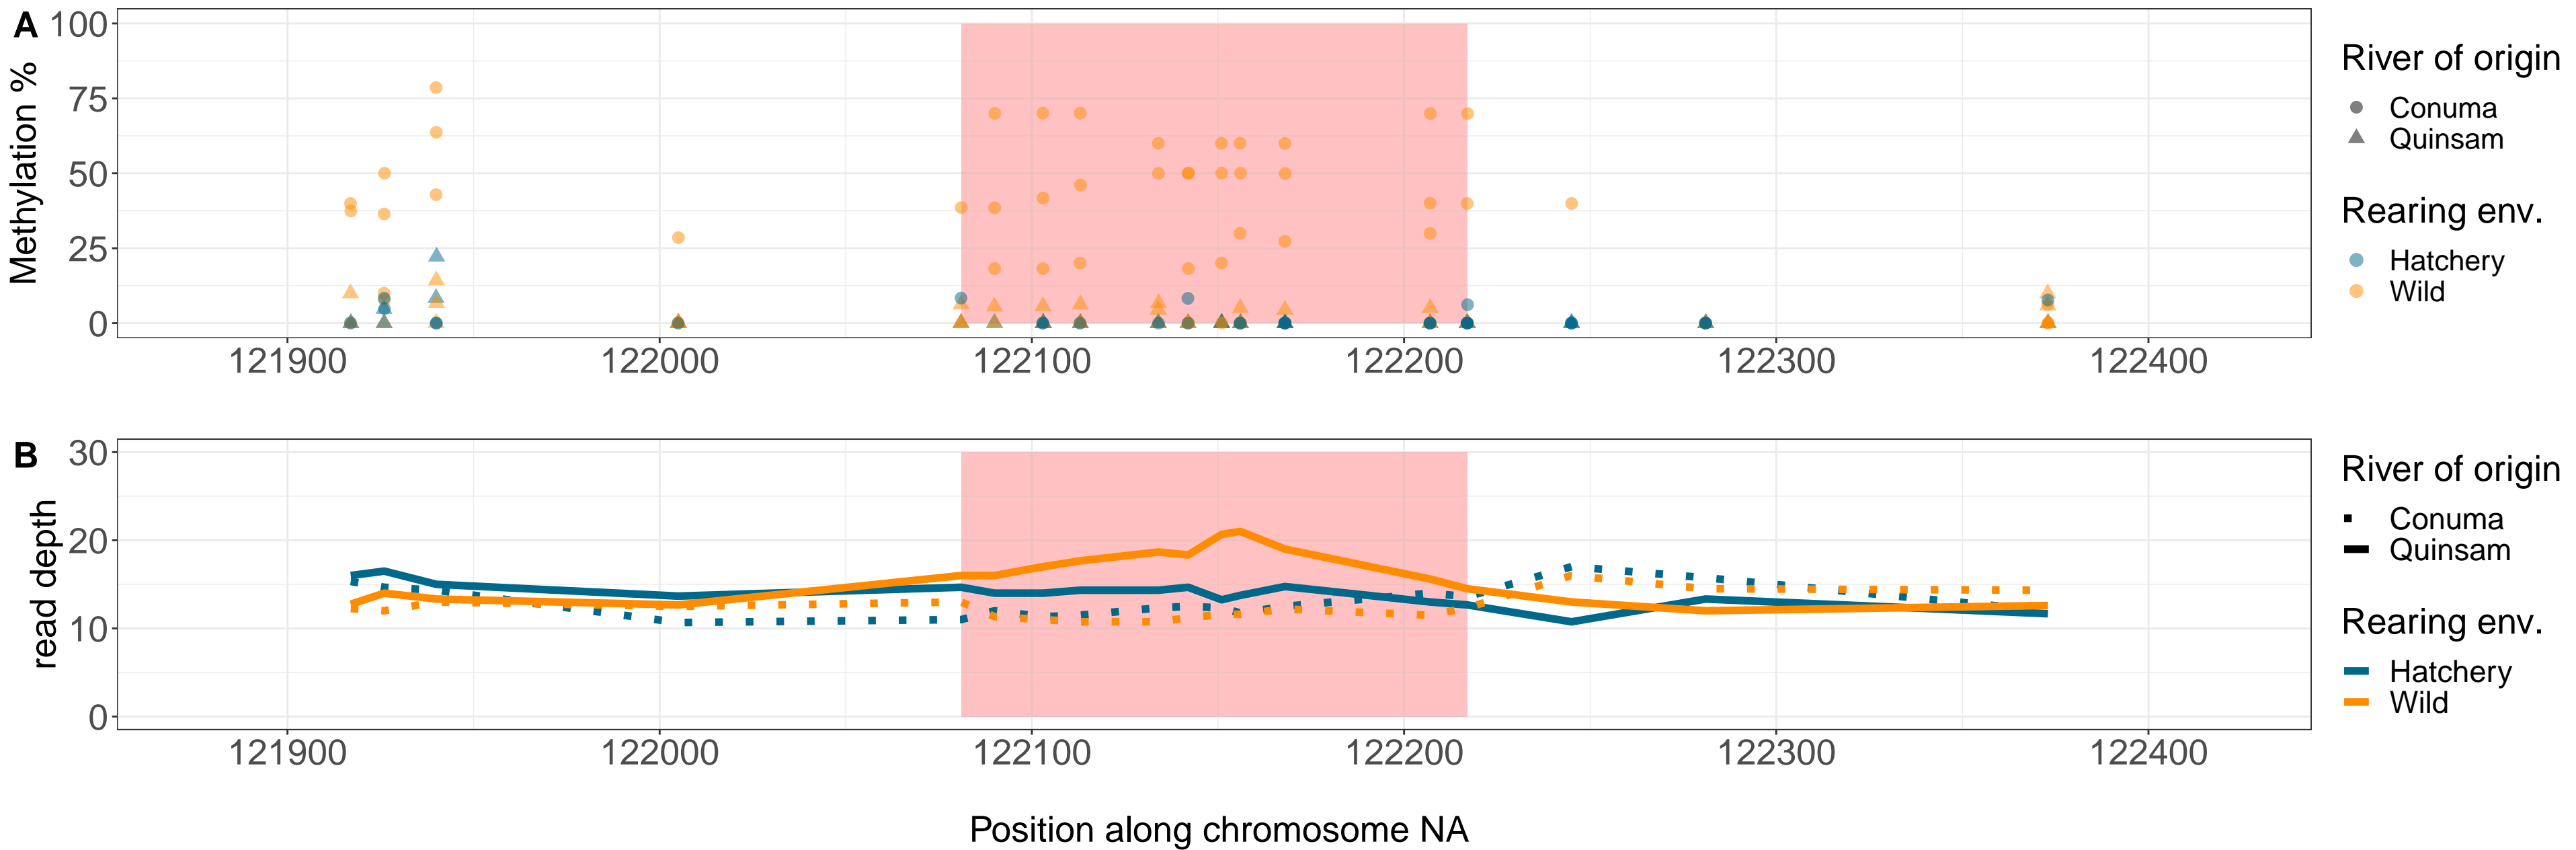

**A**

## DMR\_188

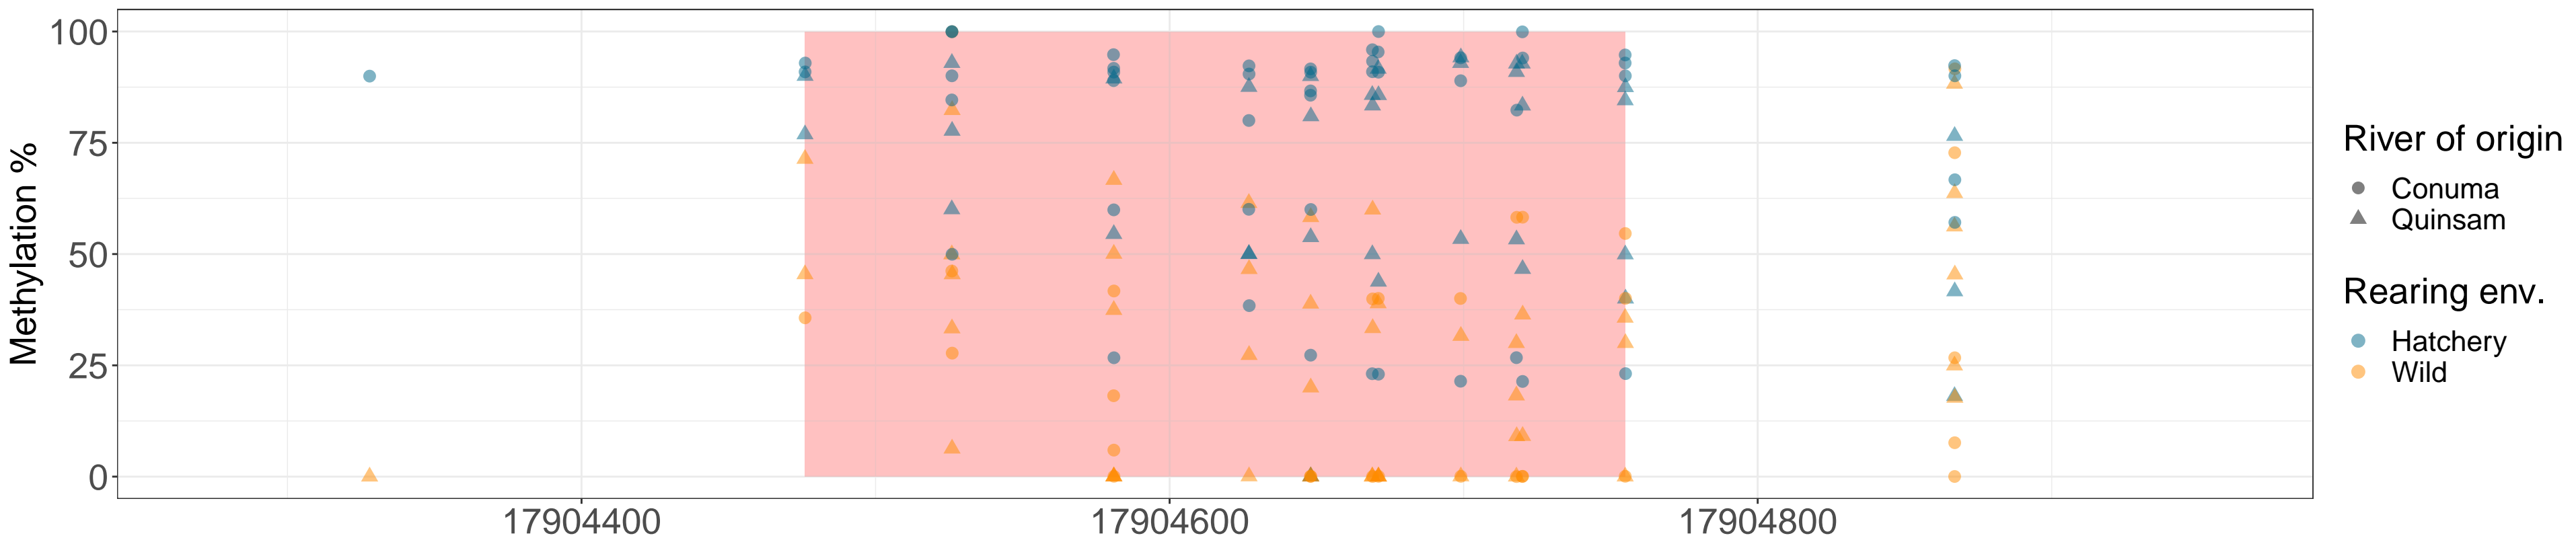**B**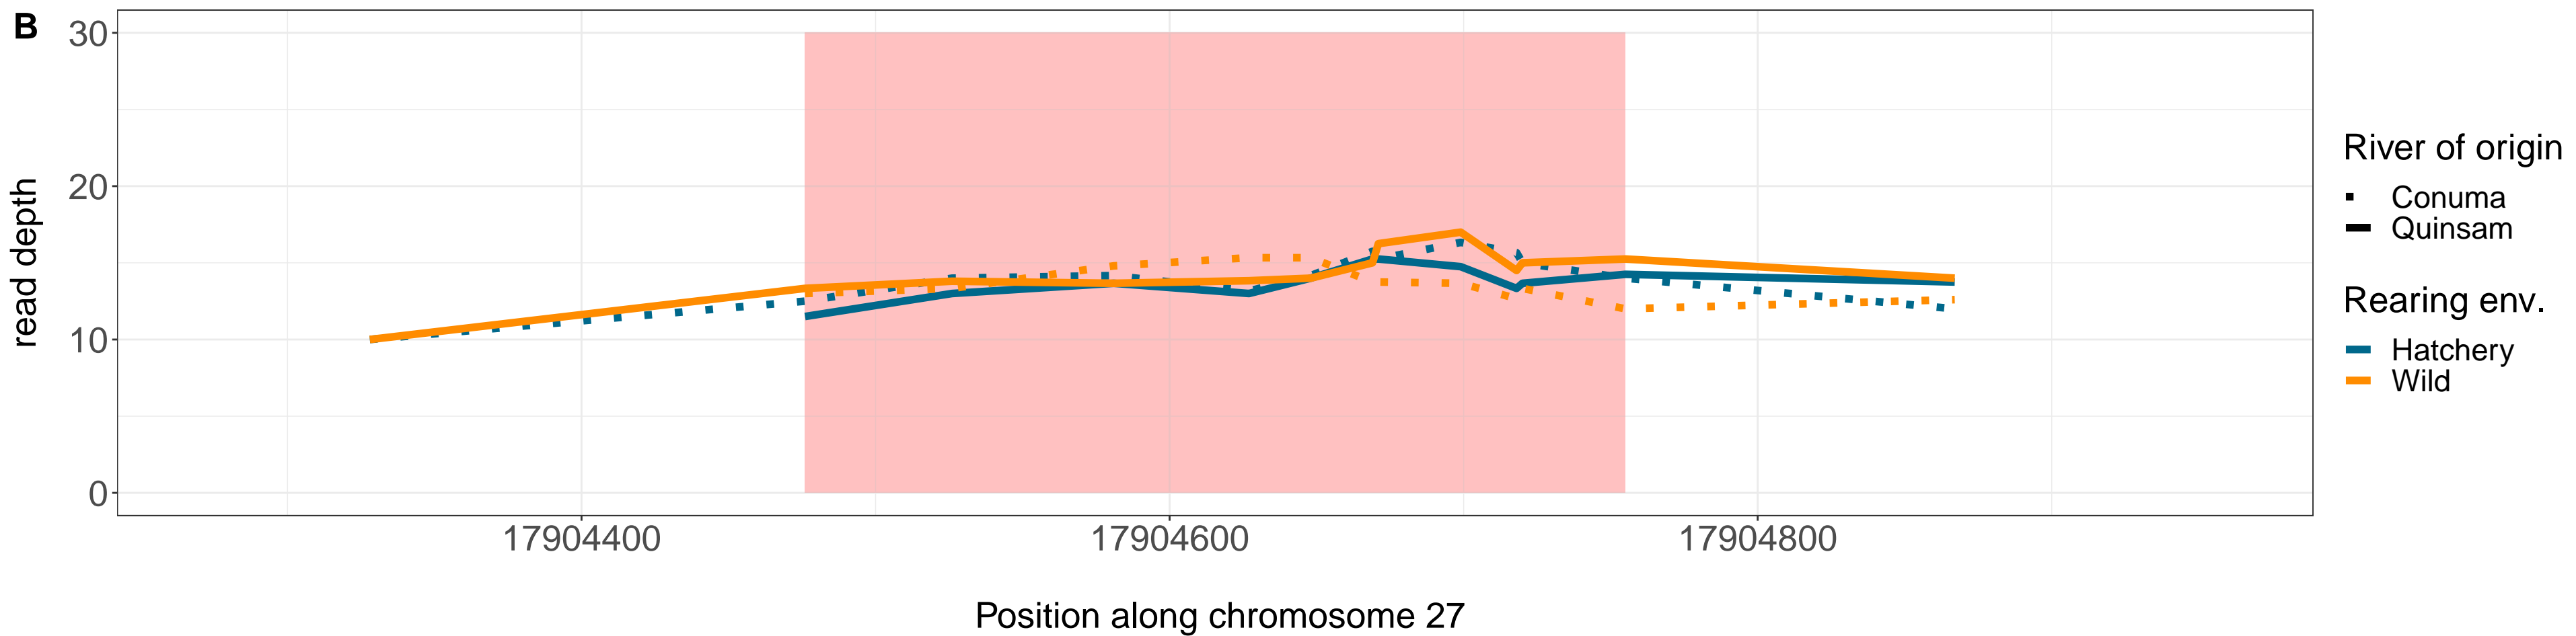

**A**

## DMR\_189

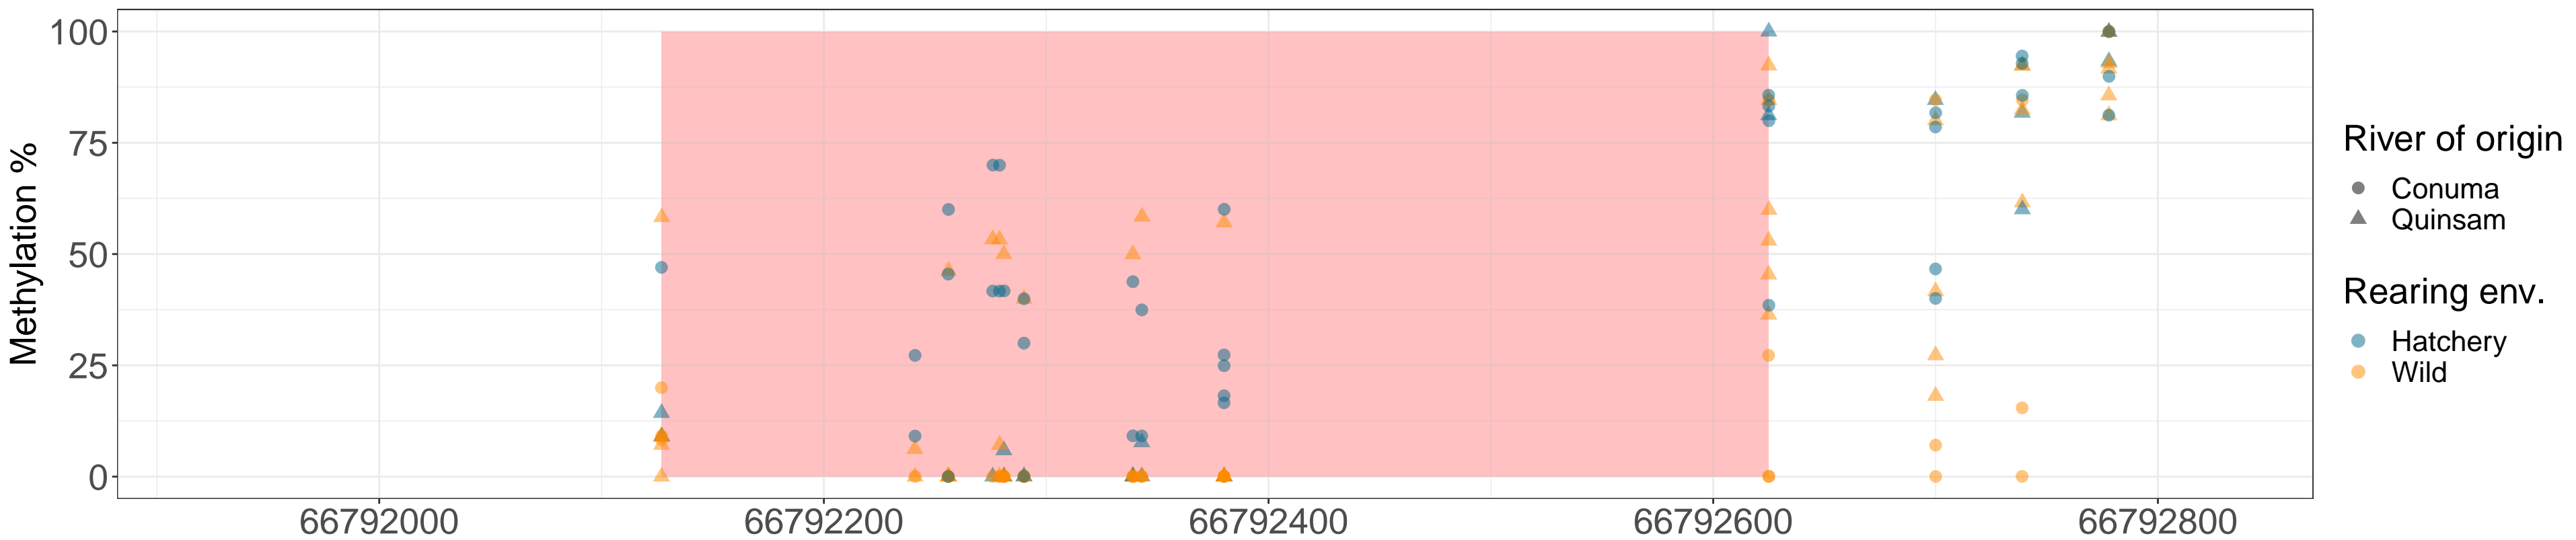**B**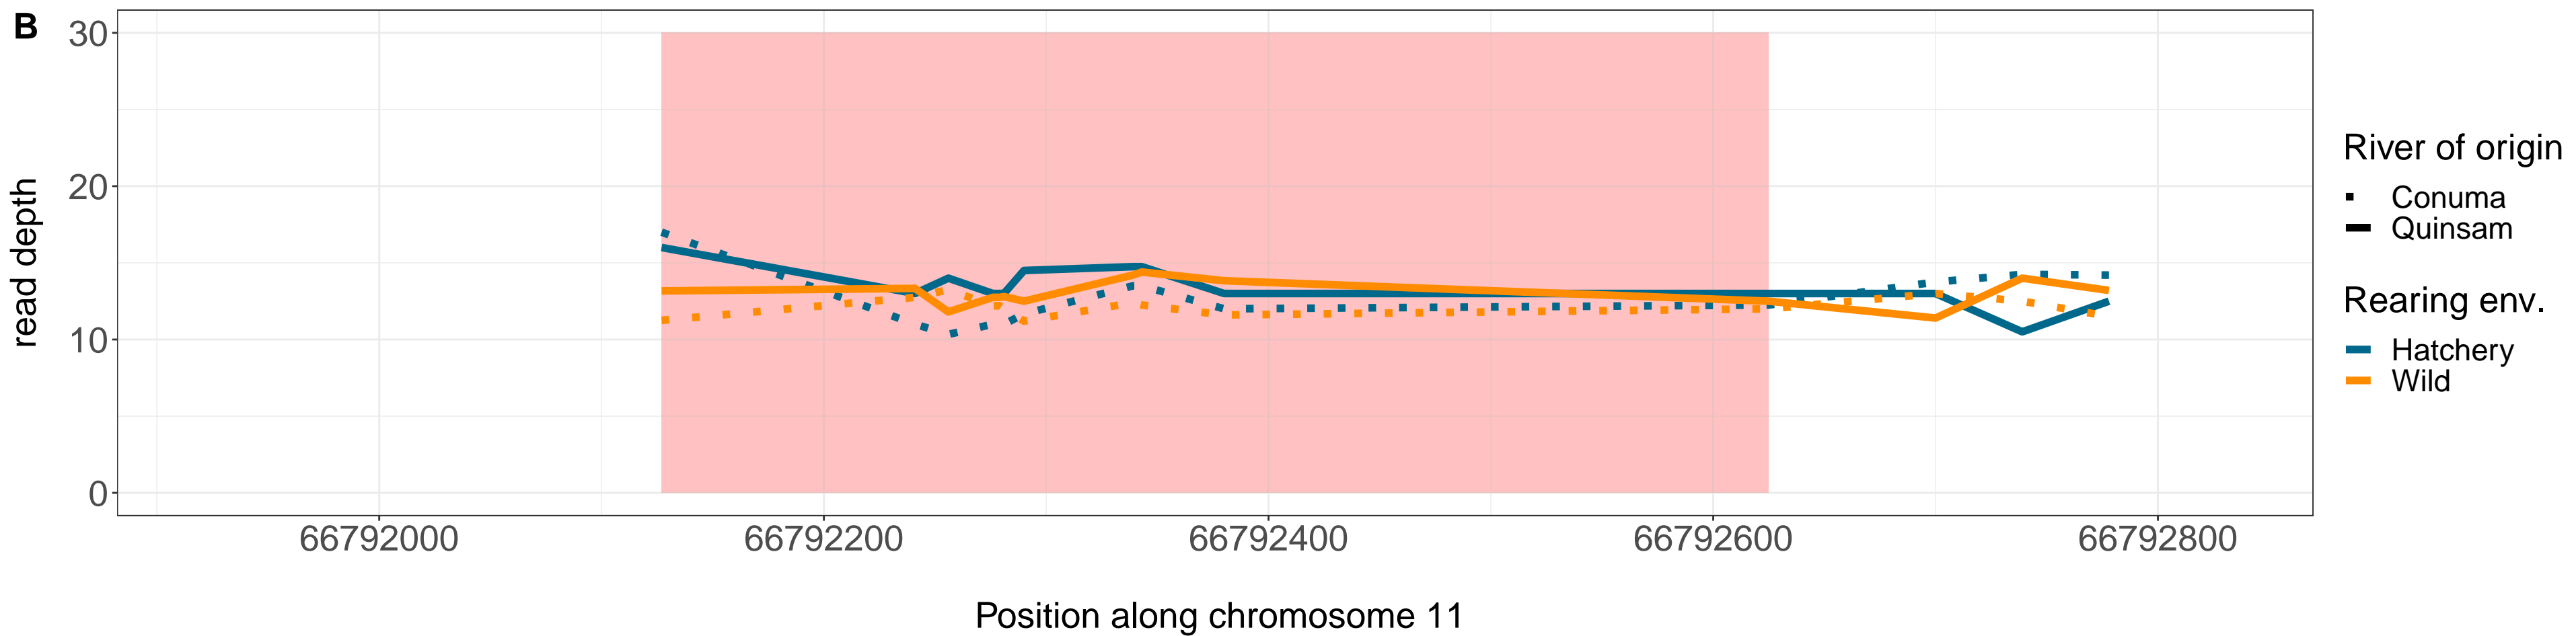



**A**

## DMR\_190

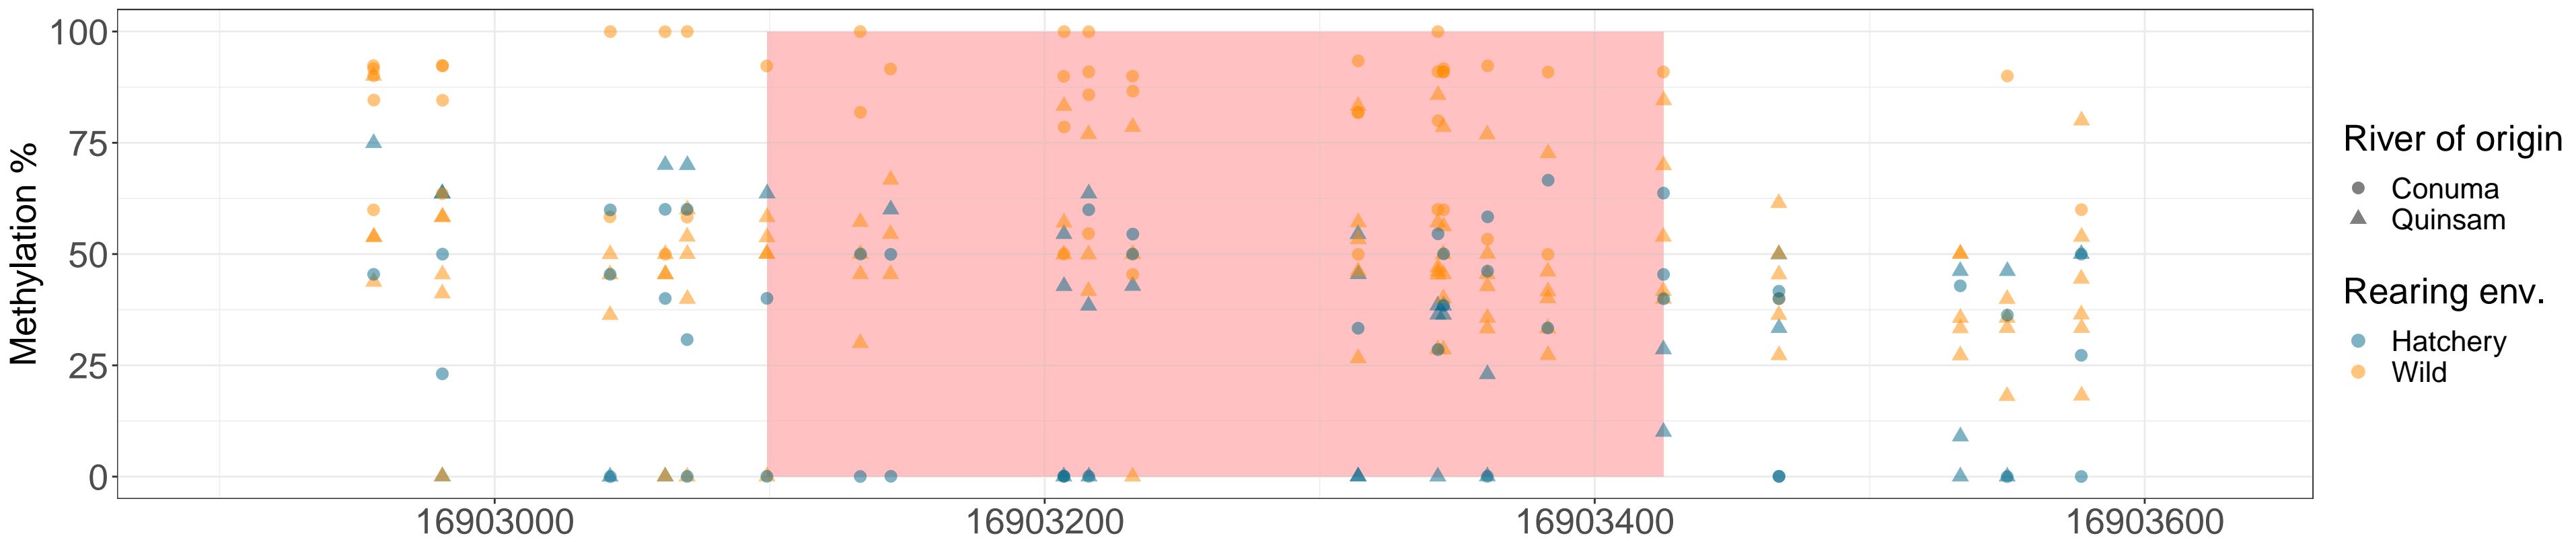**B**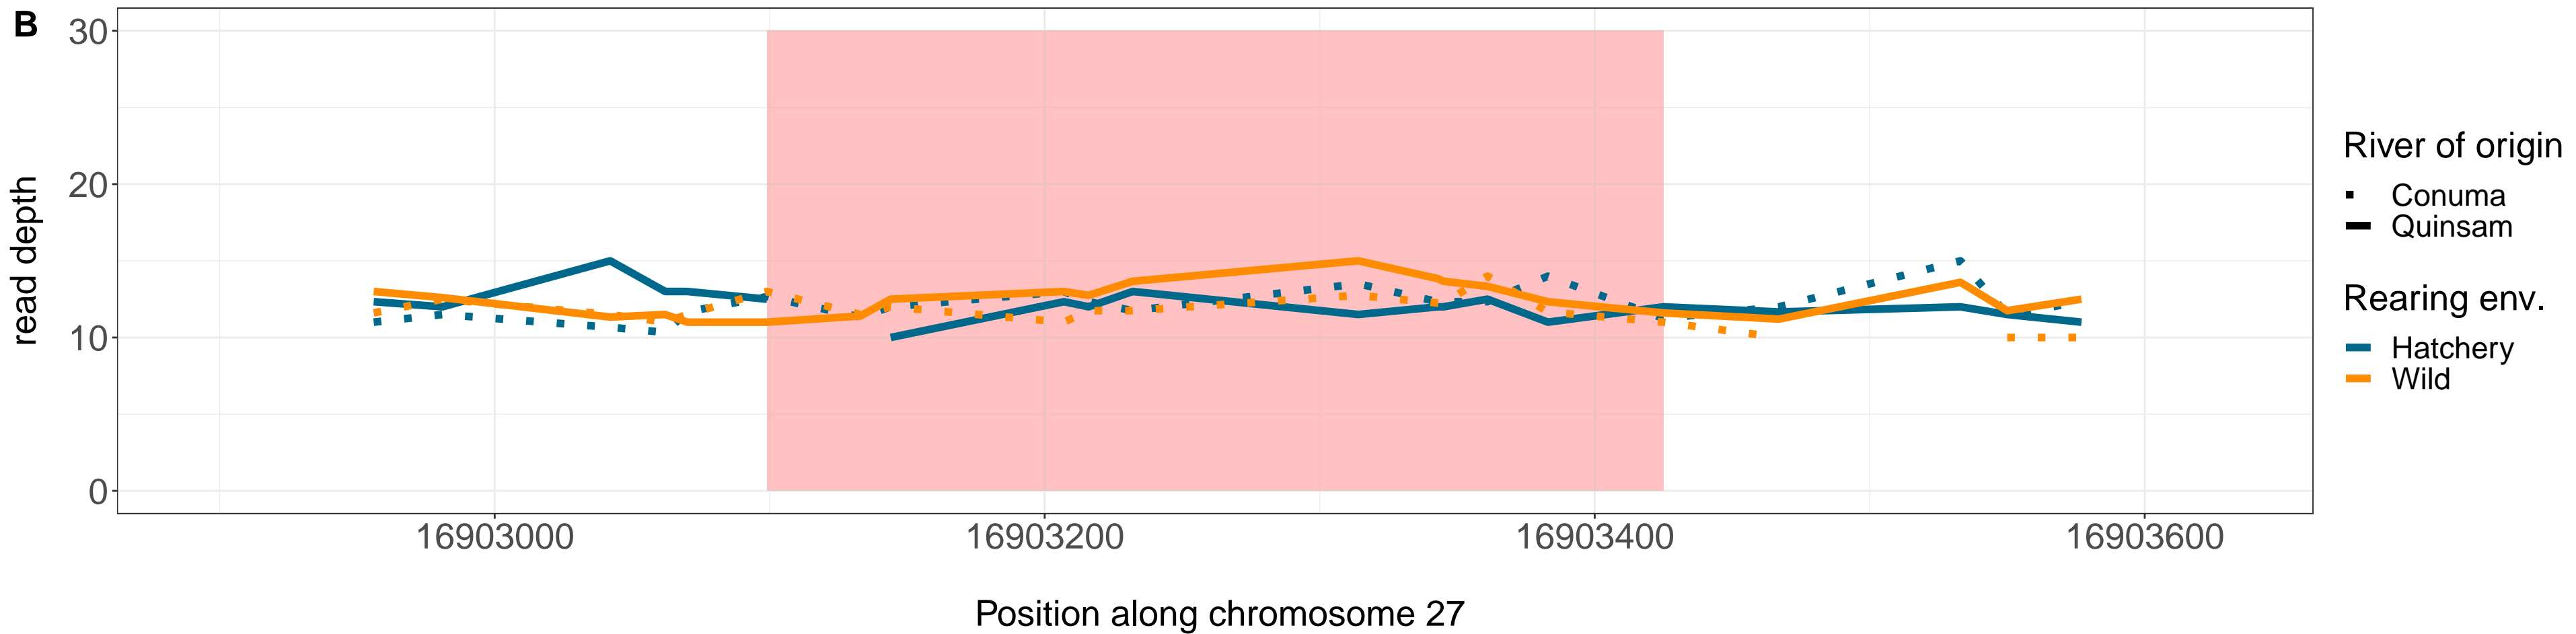

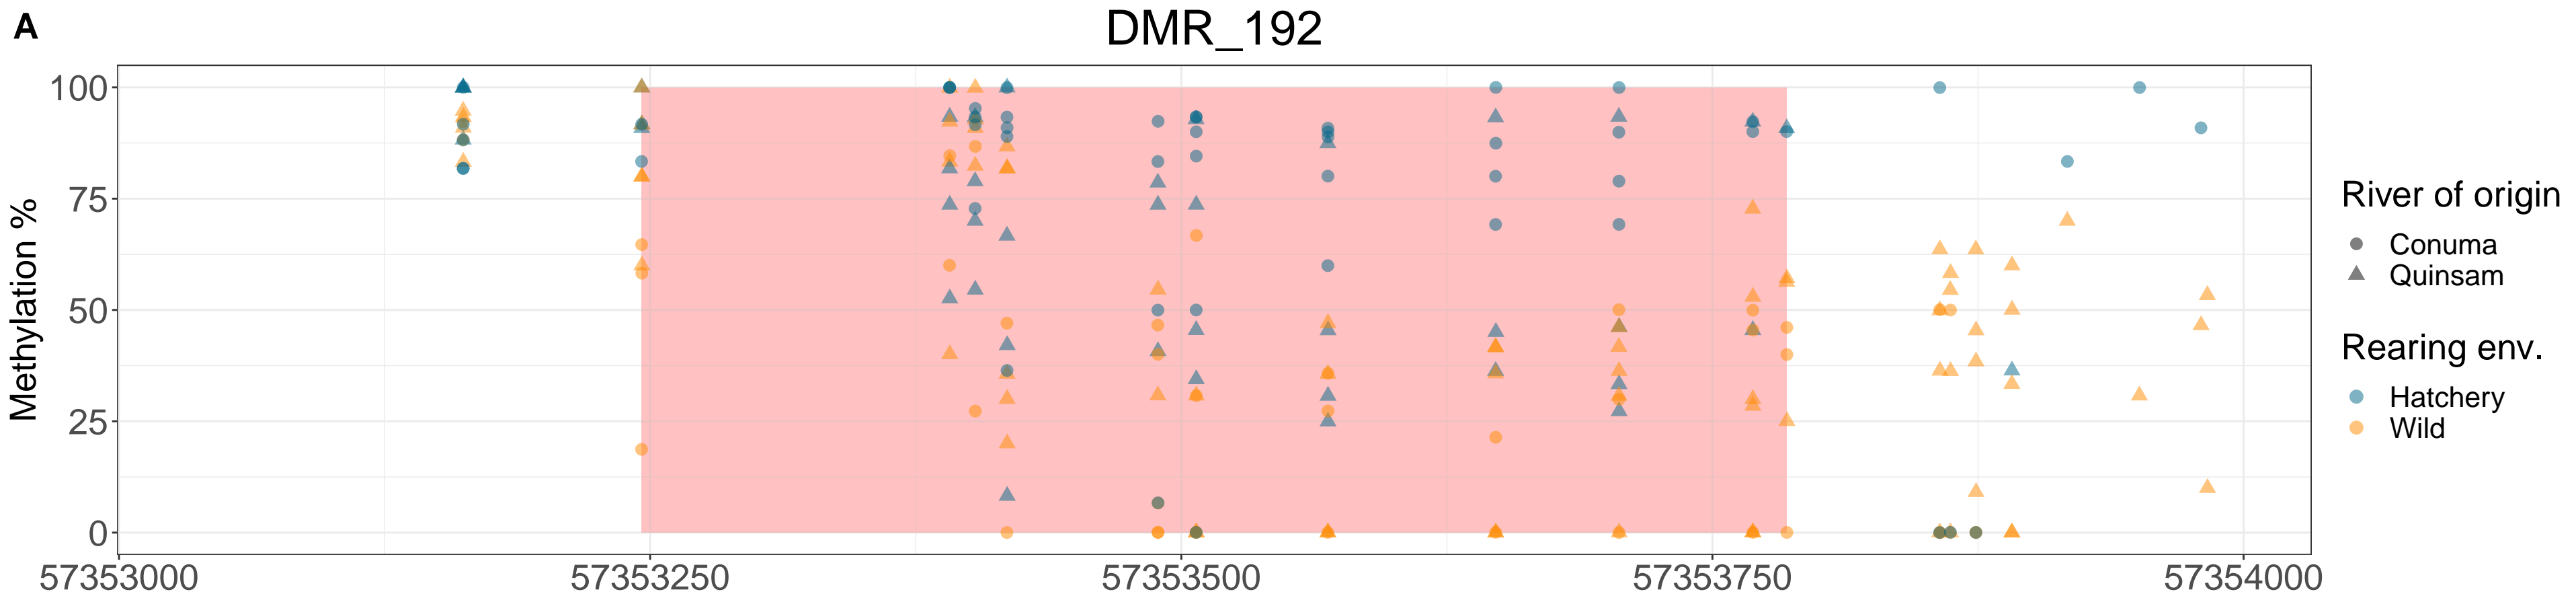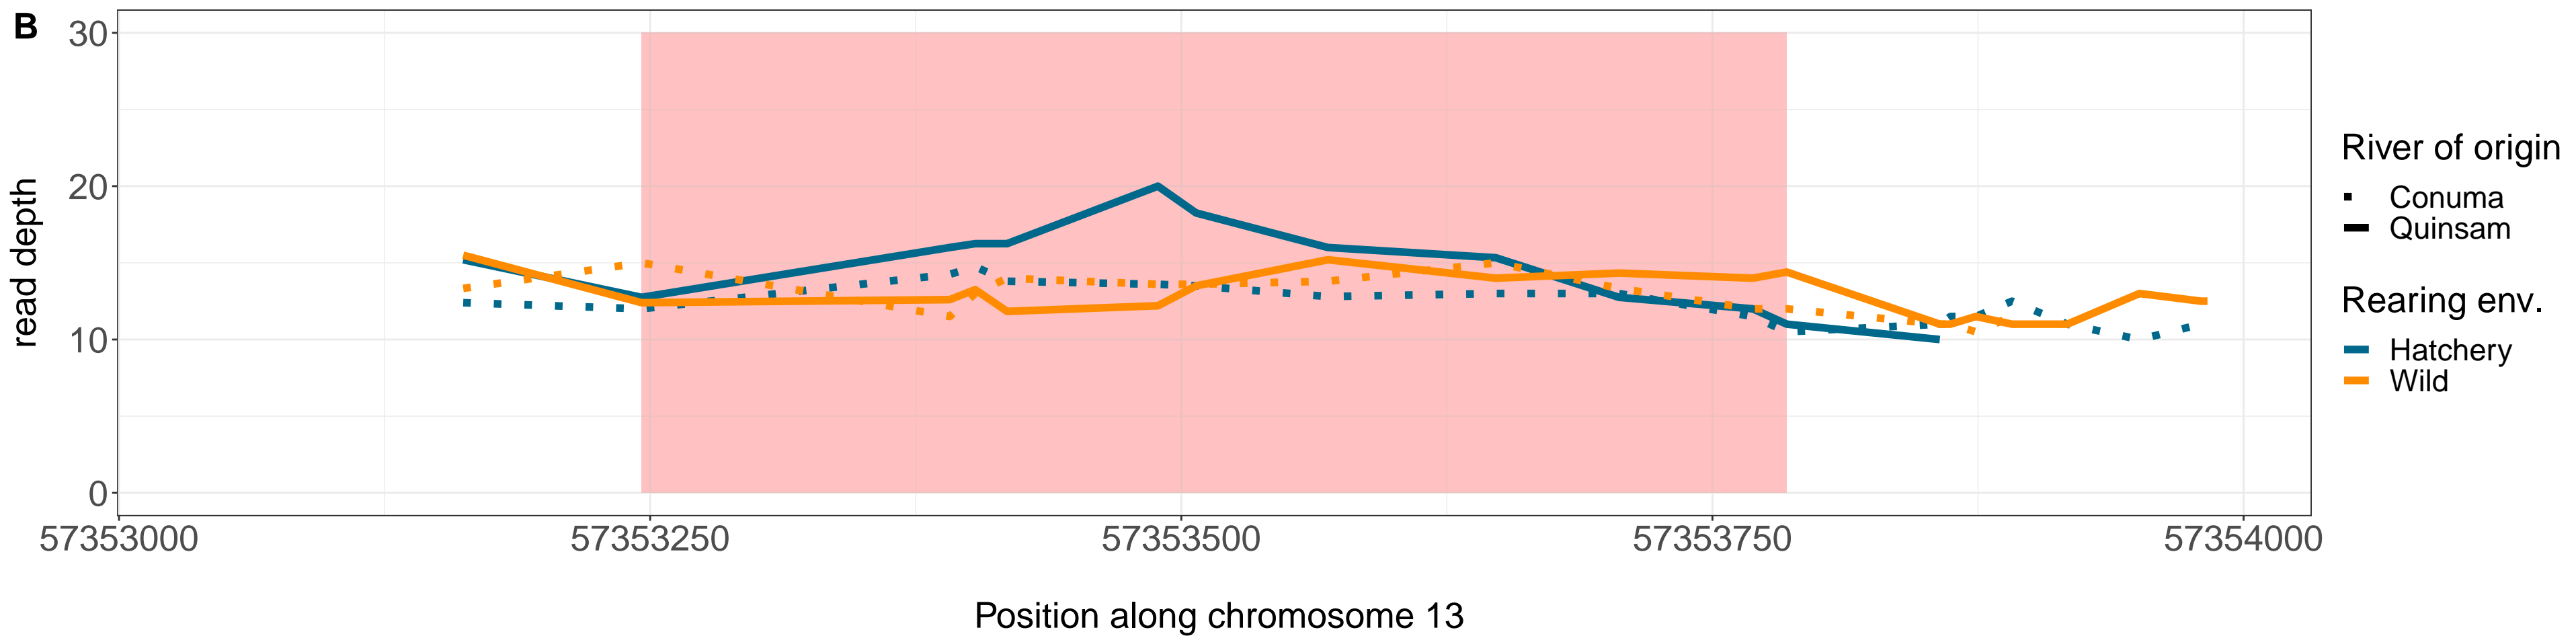

**A**

## DMR\_193

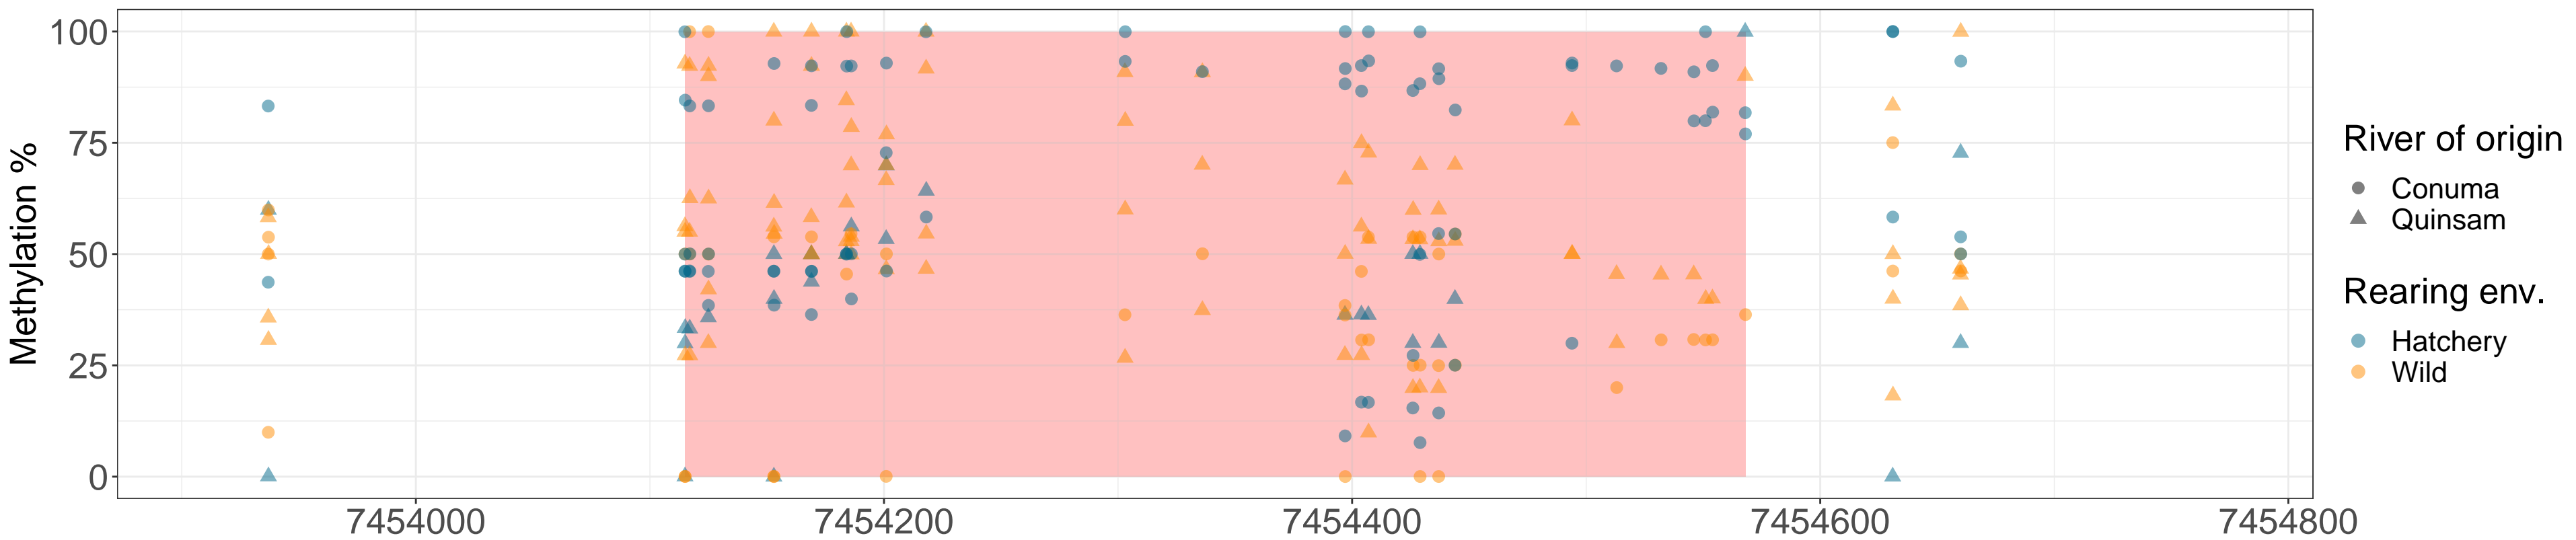**B**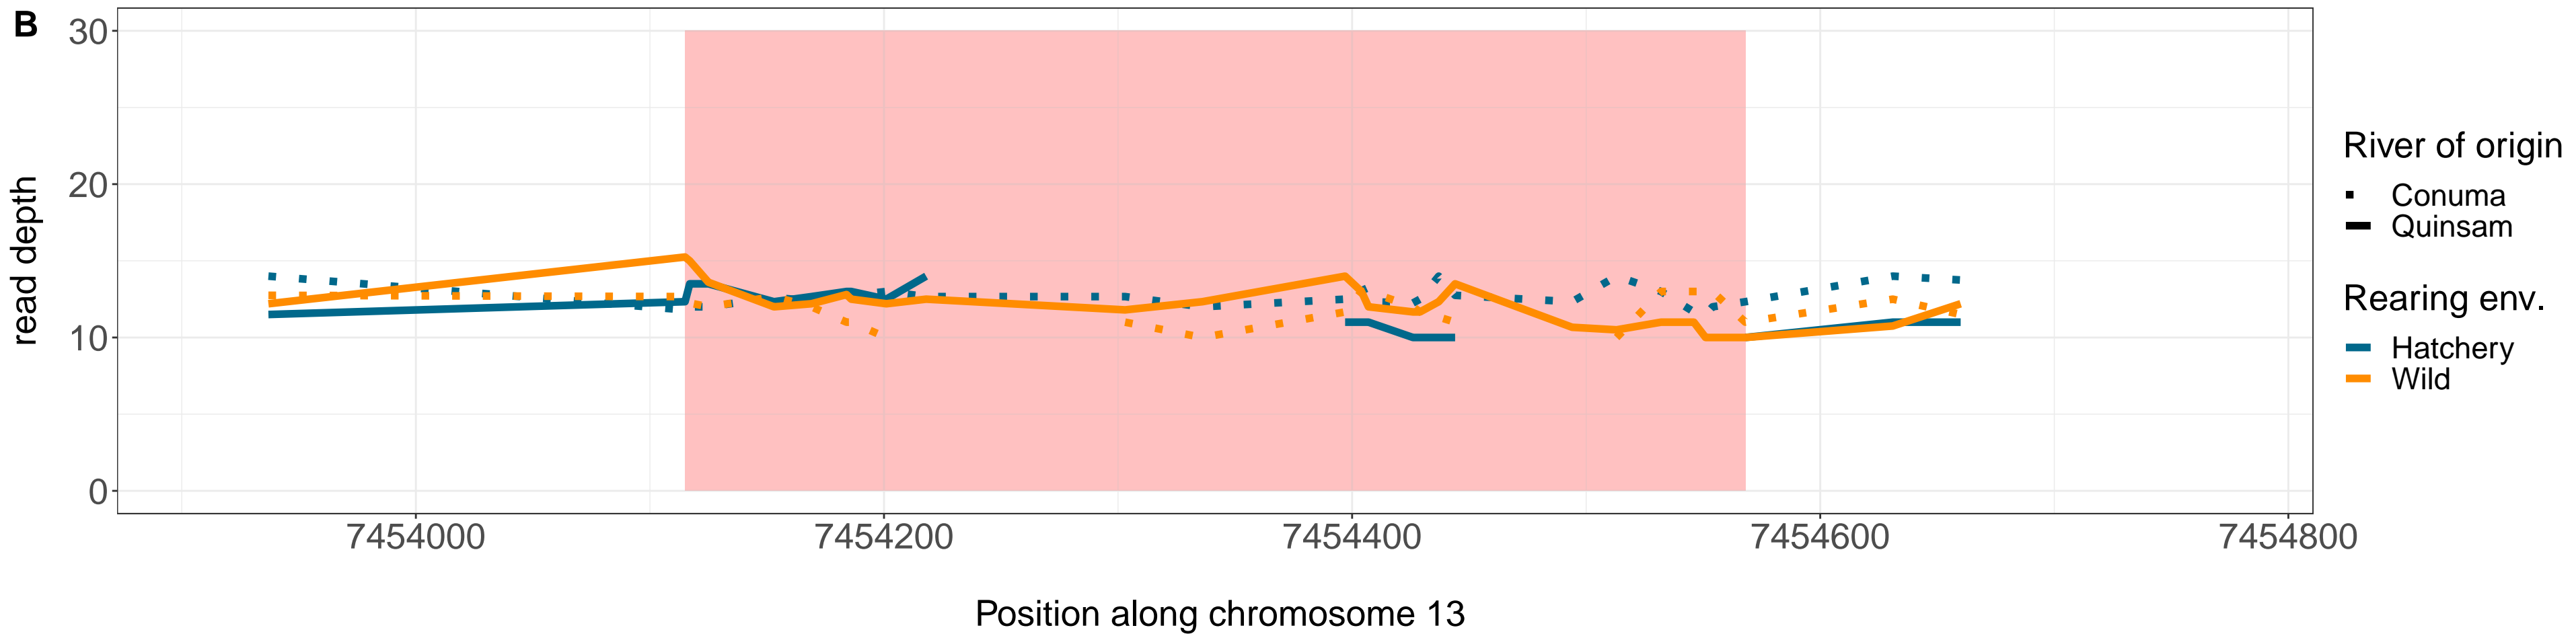

**A**

## DMR\_194

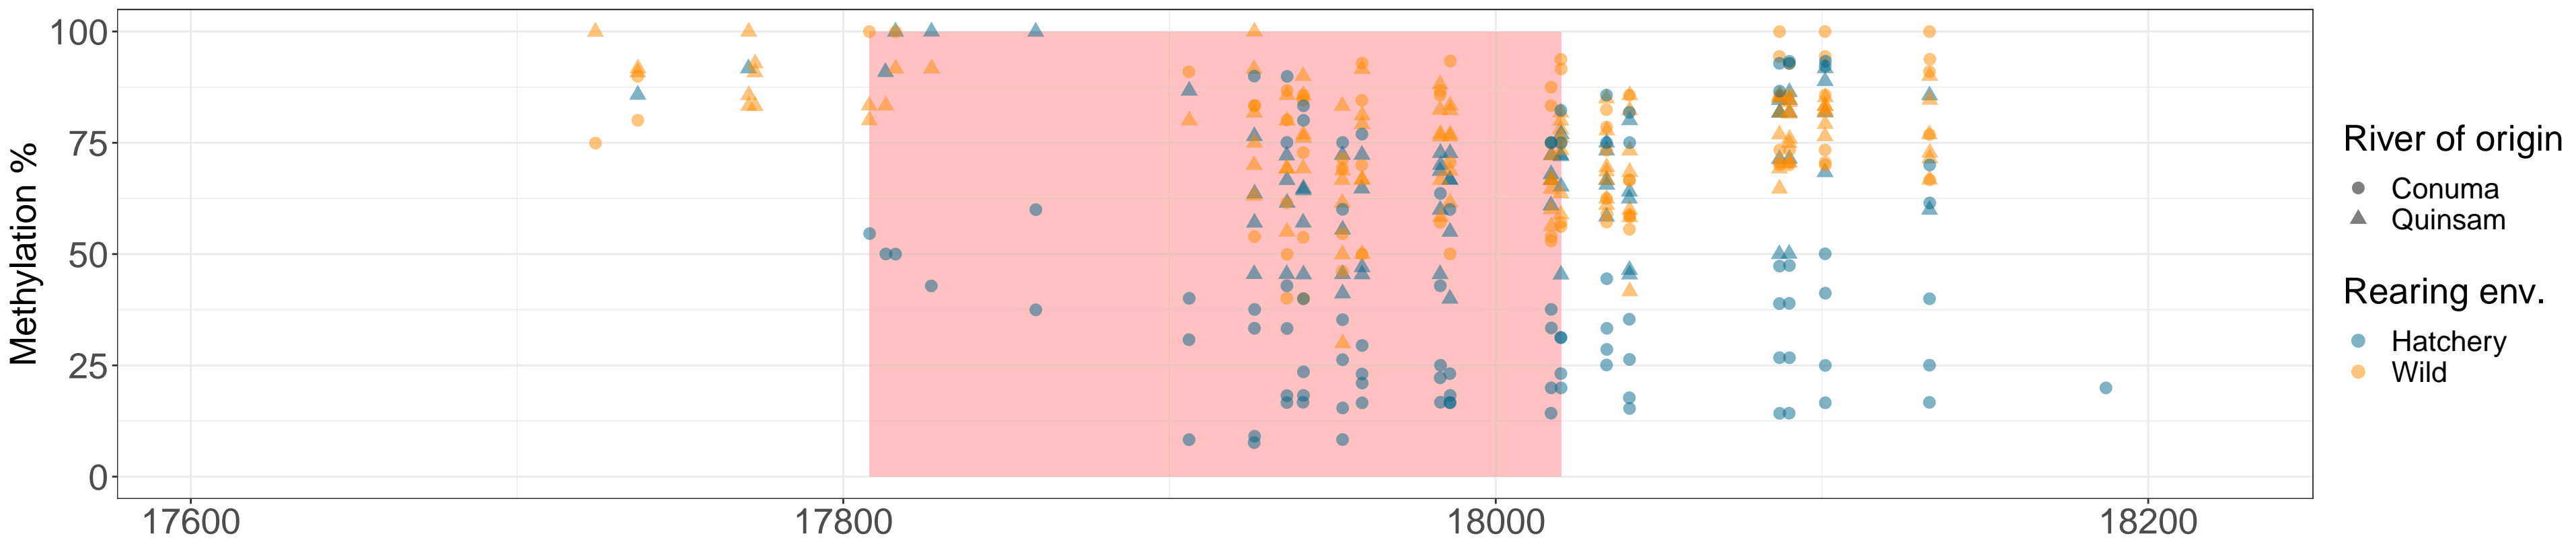**B**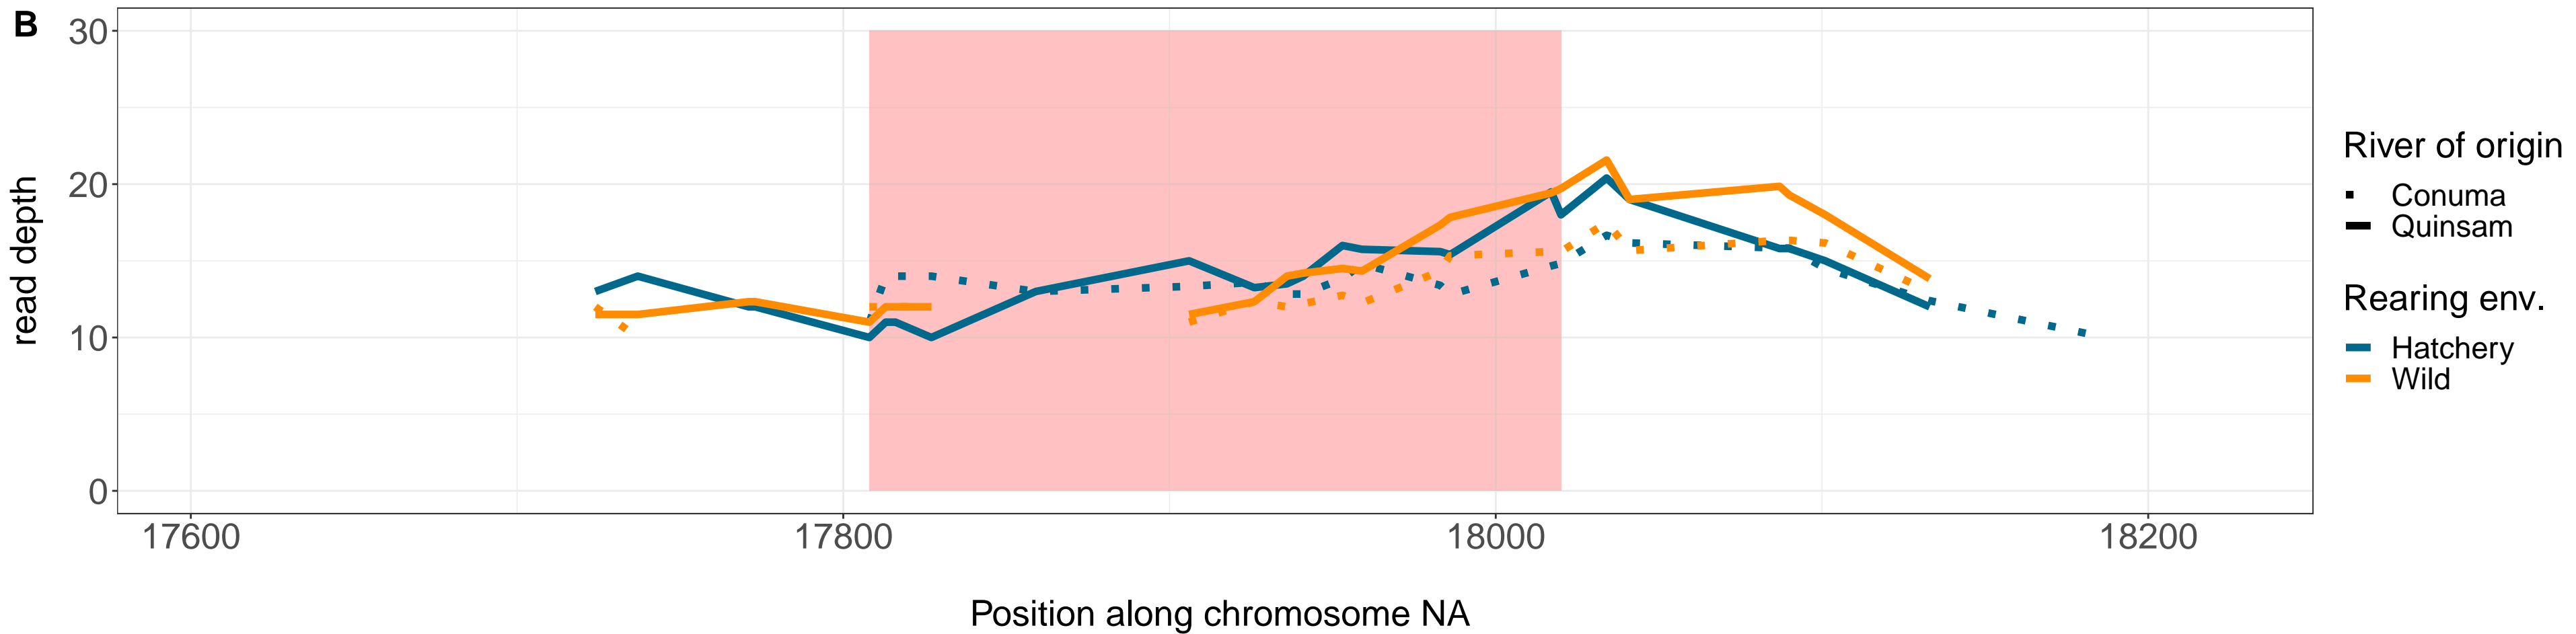

**A**

## DMR\_196

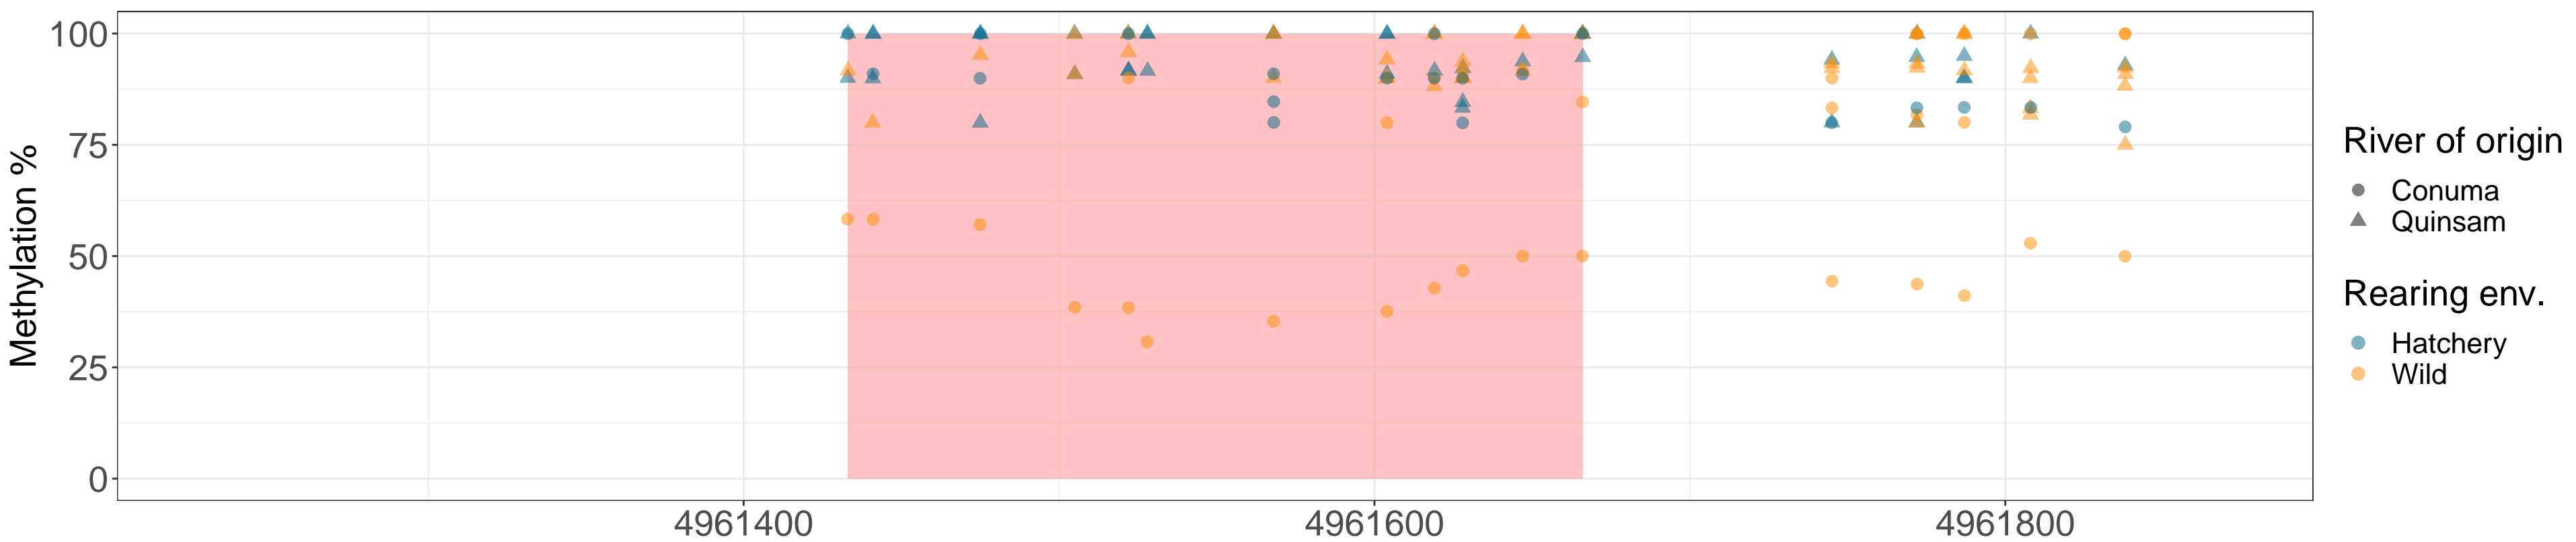**B**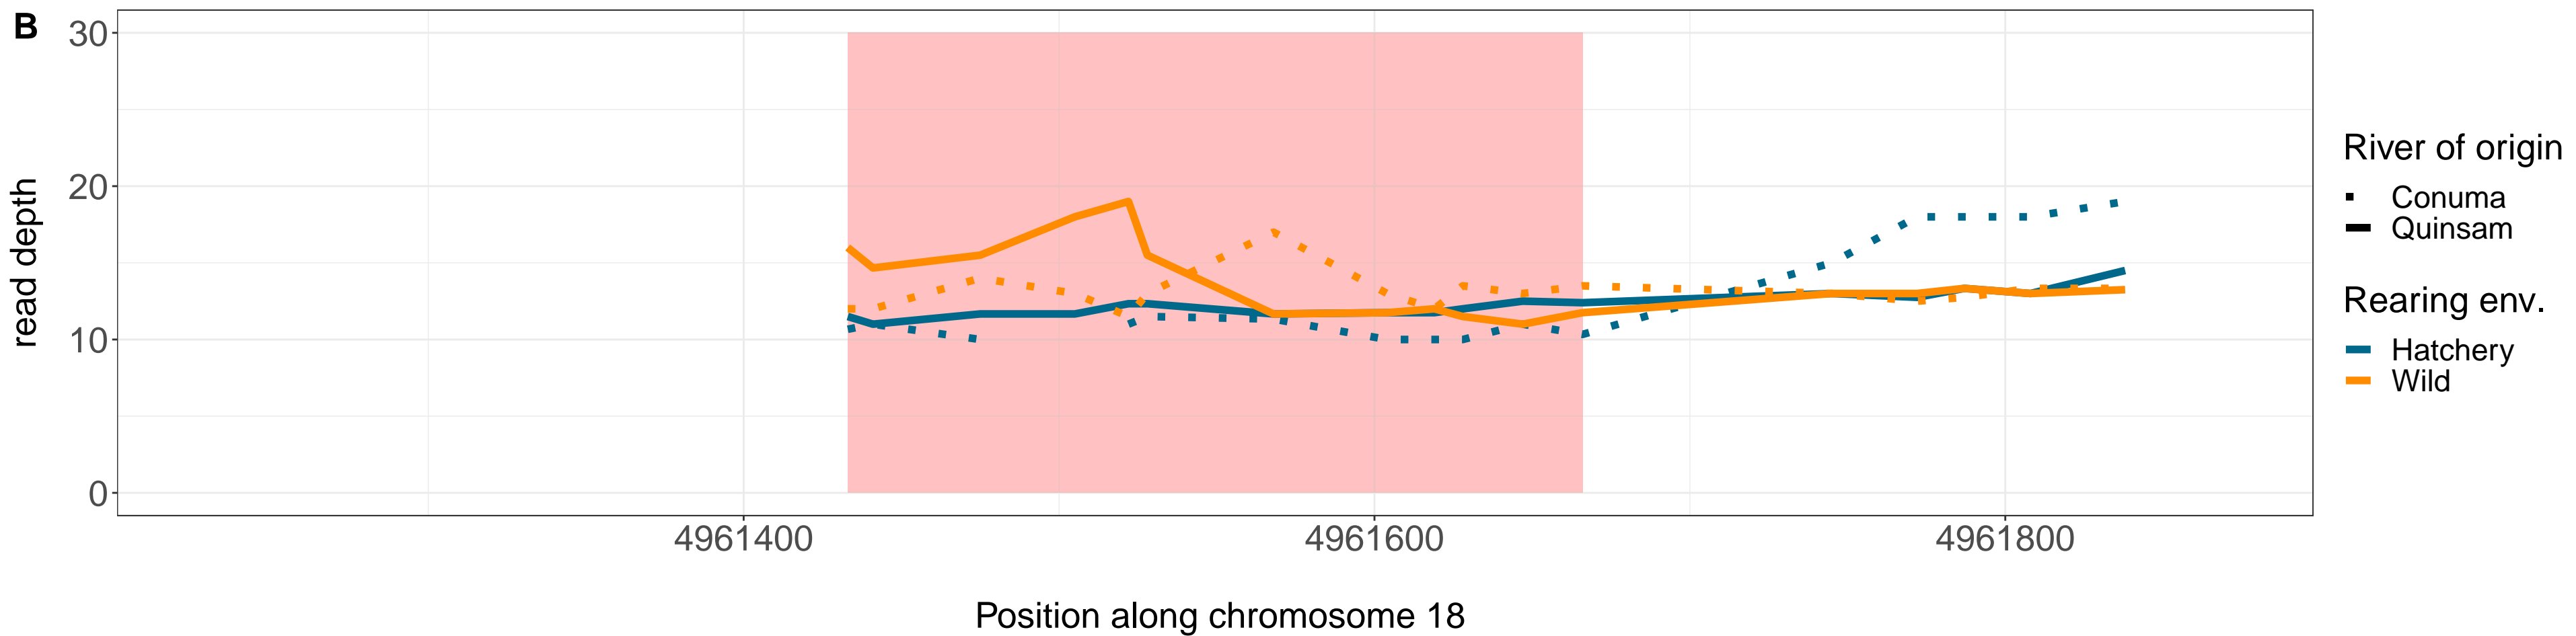

**A**

## DMR\_197

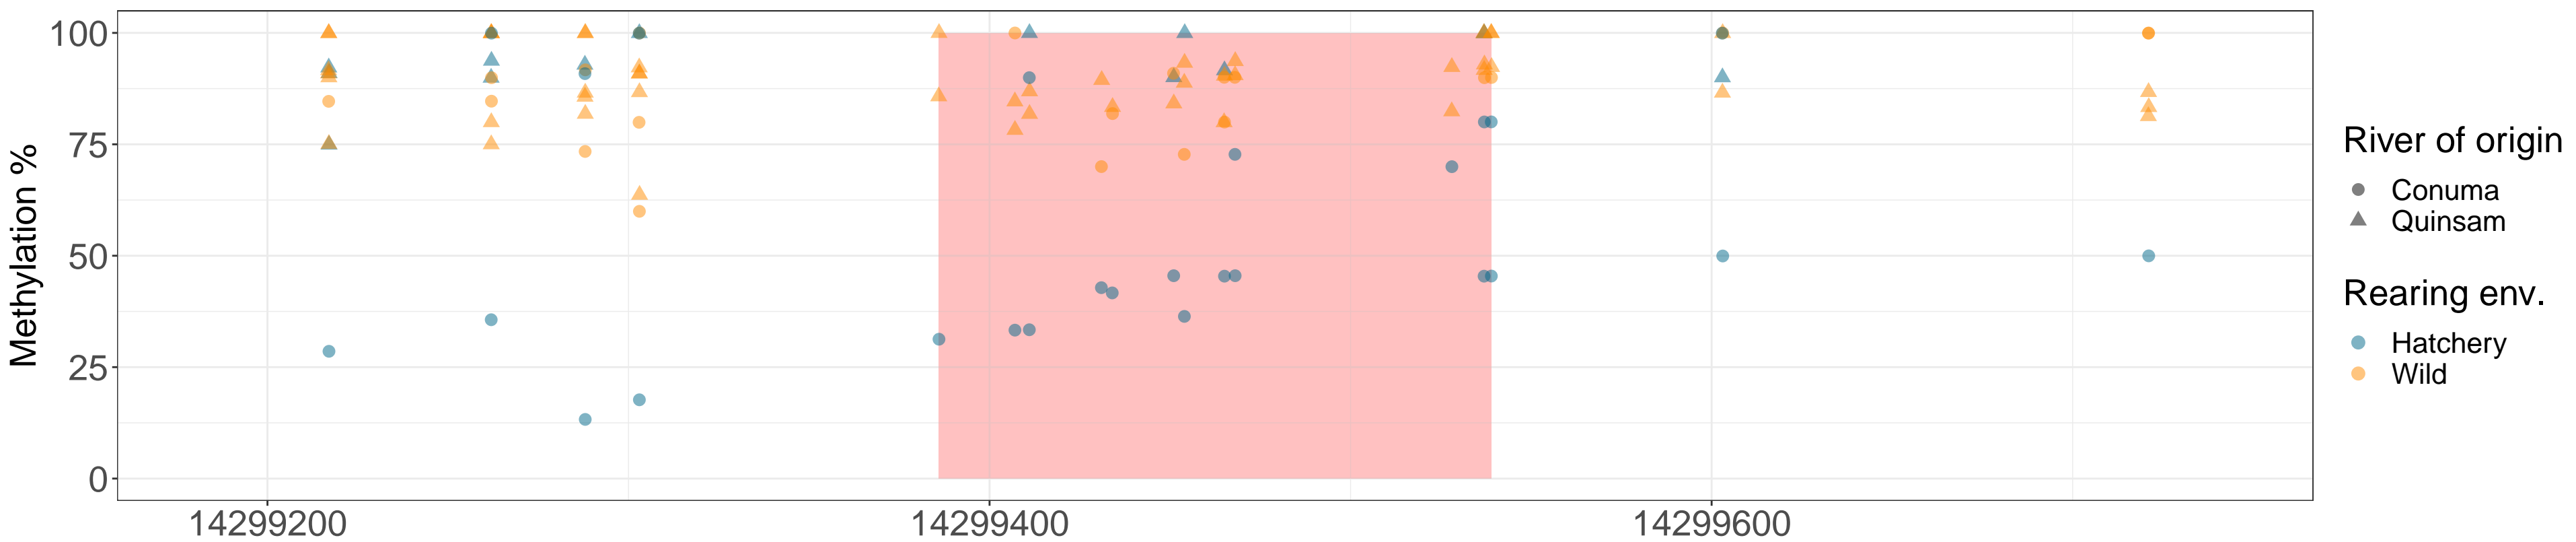**B**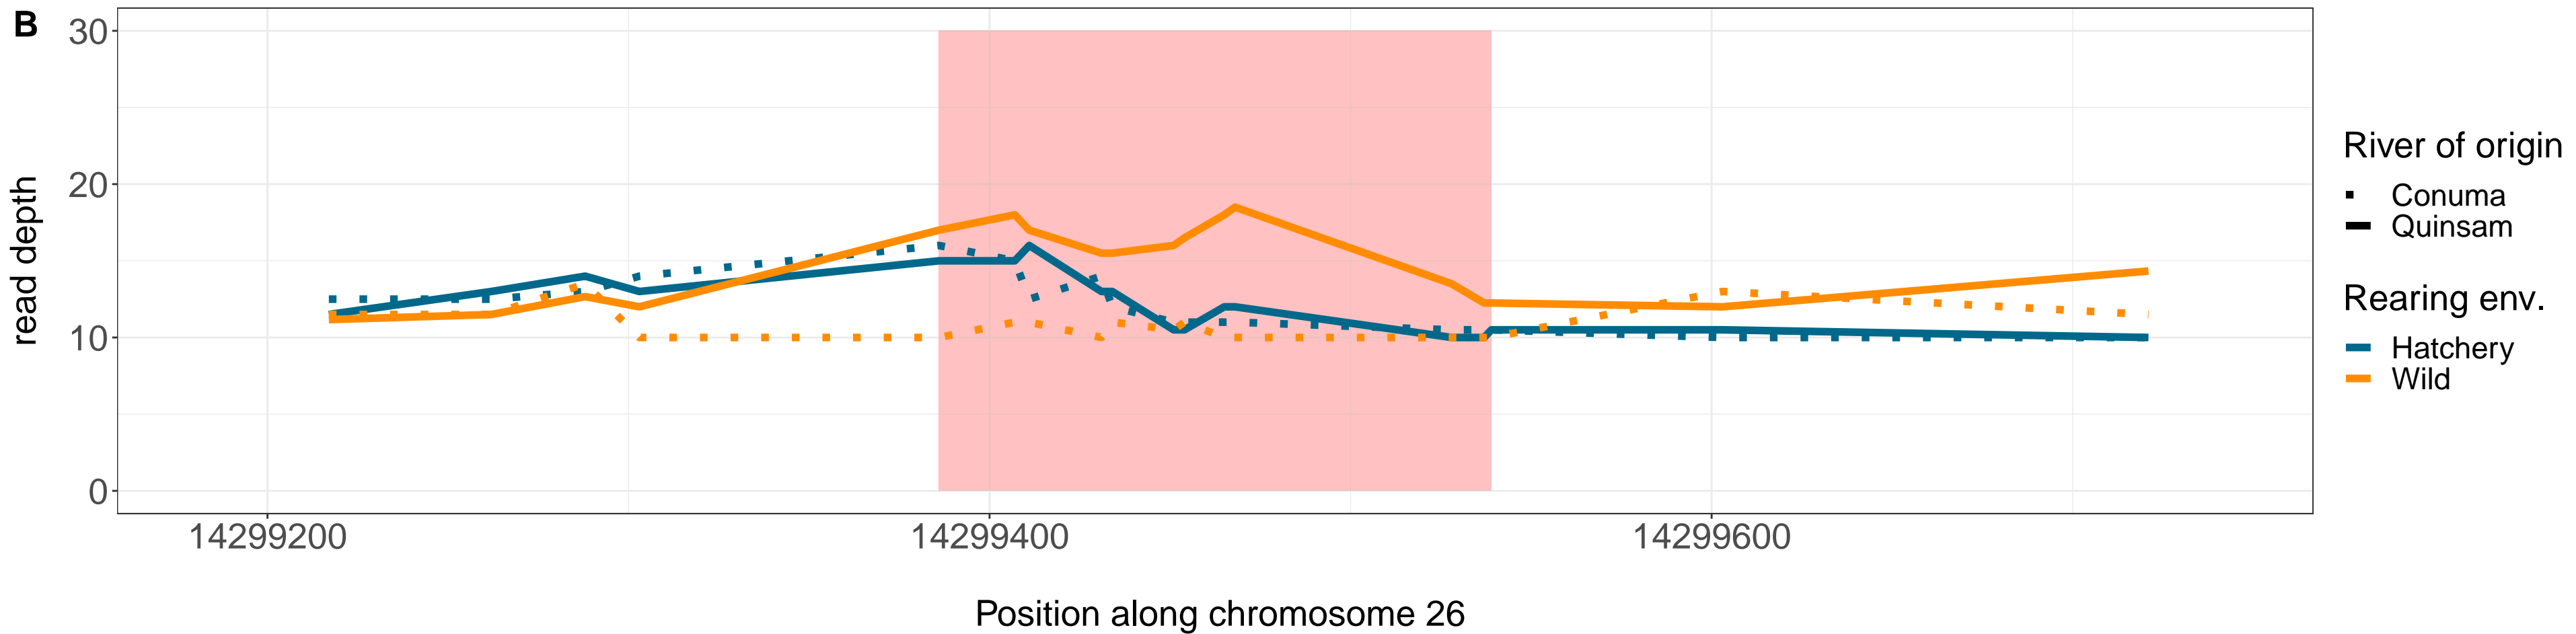

# DMR\_198

XM\_020503164.1

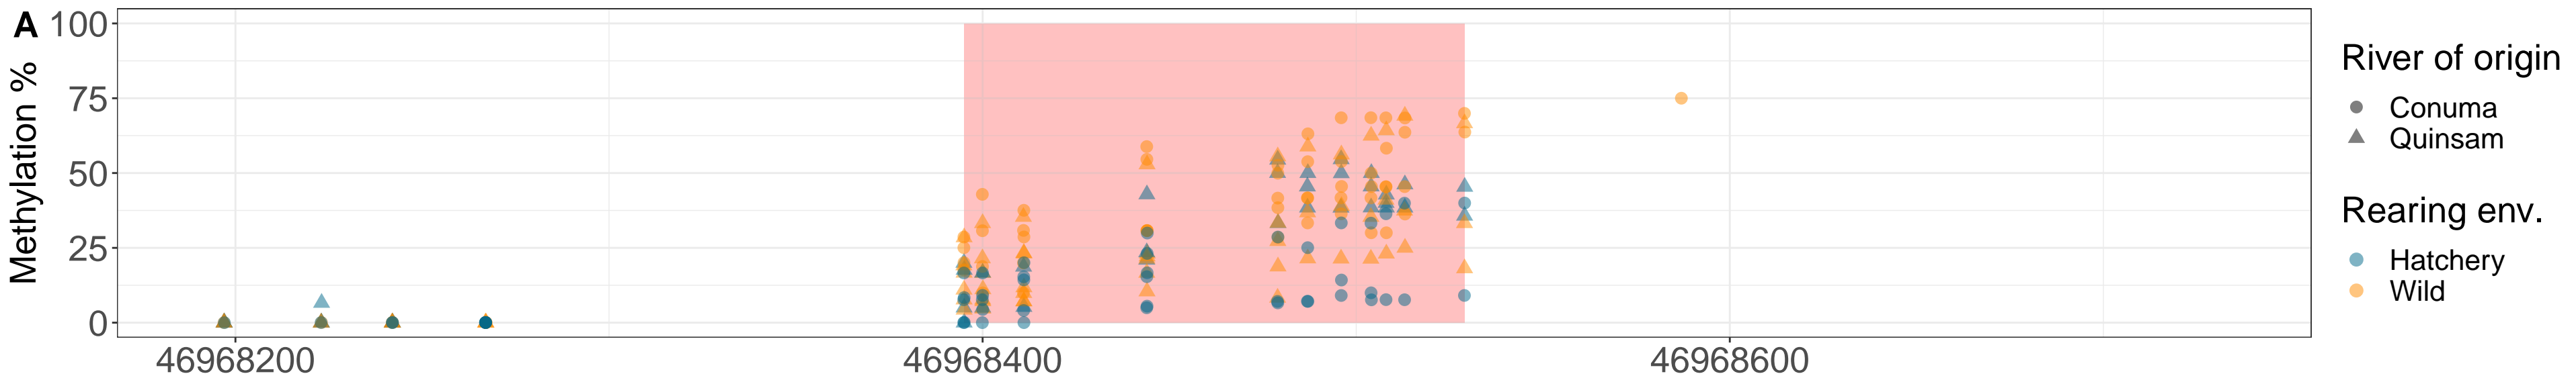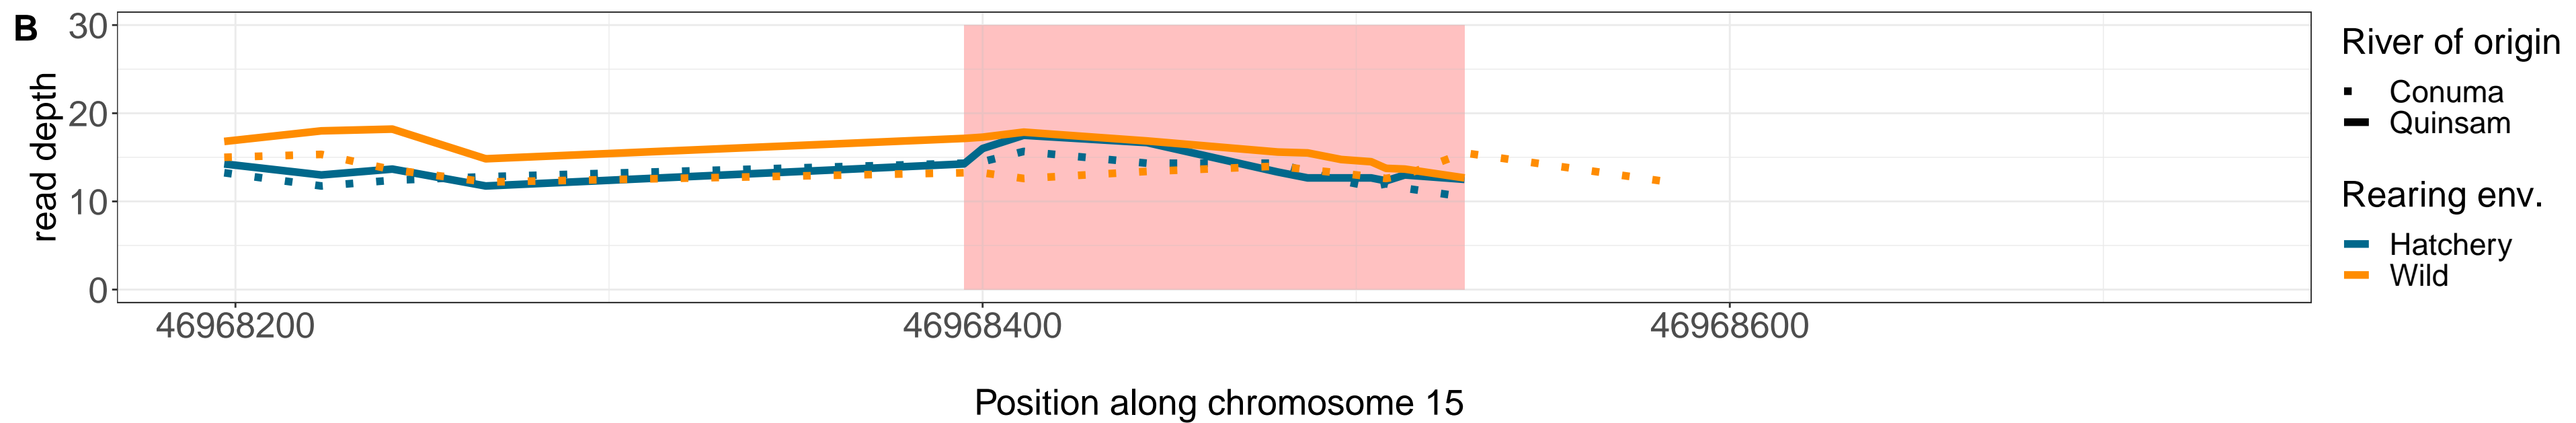

# DMR\_199

XM\_020497701.1

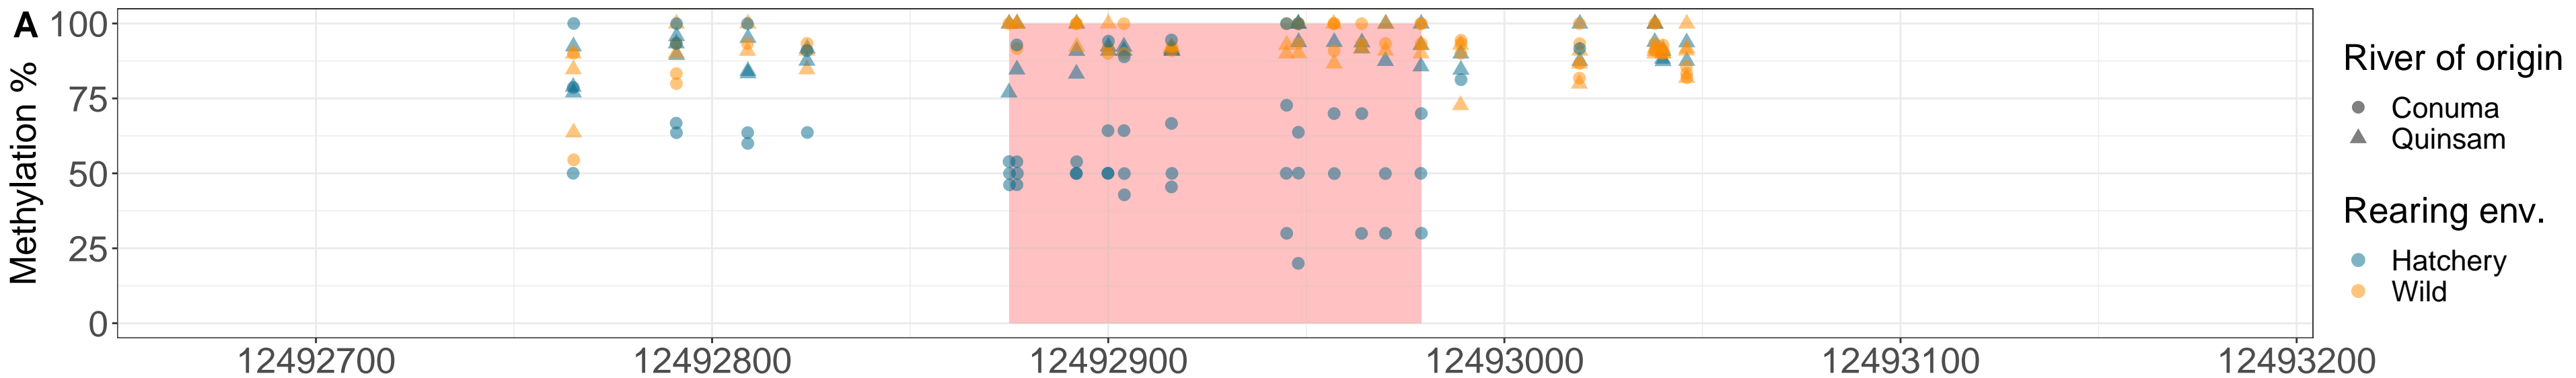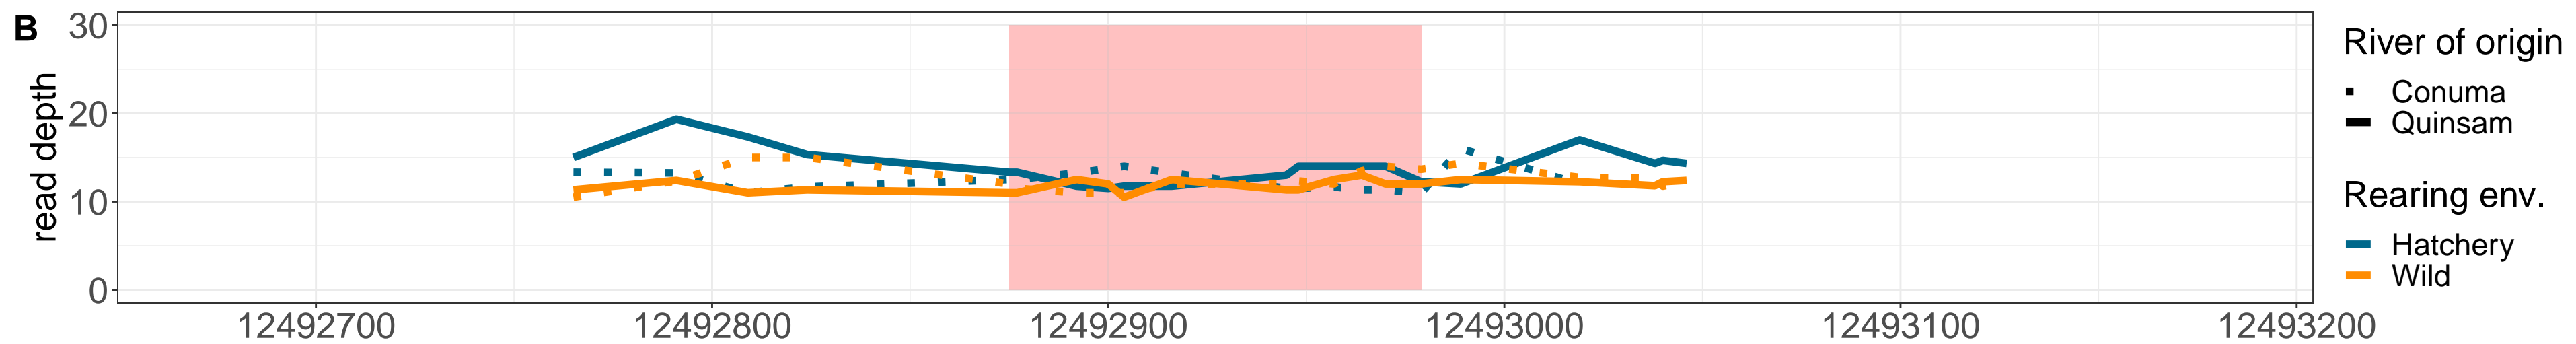

Position along chromosome 13



**A**

## DMR\_200

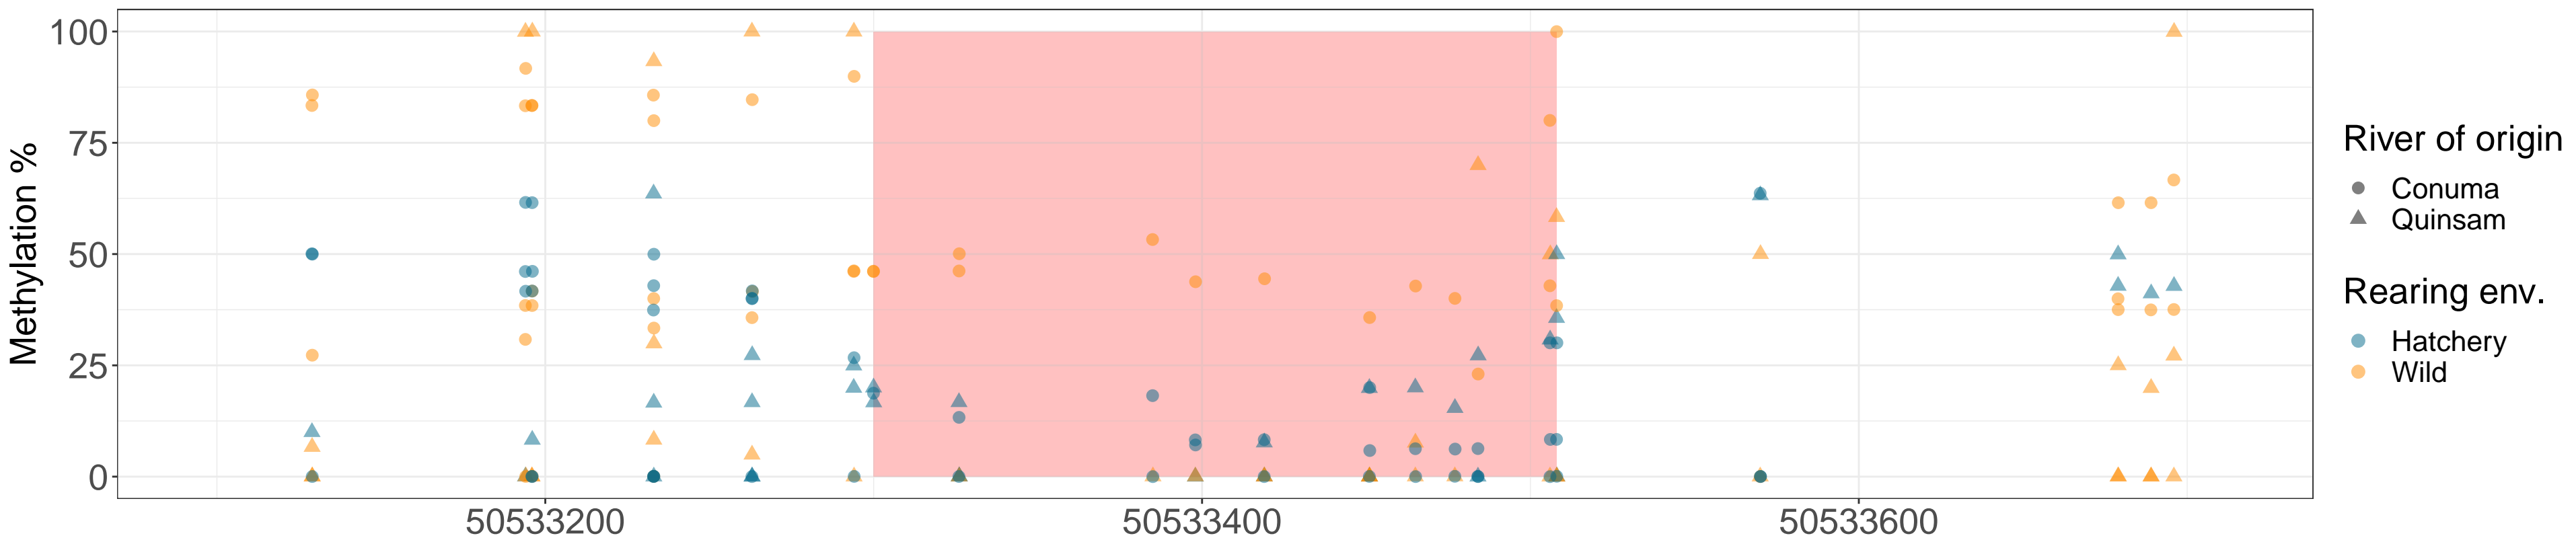**B**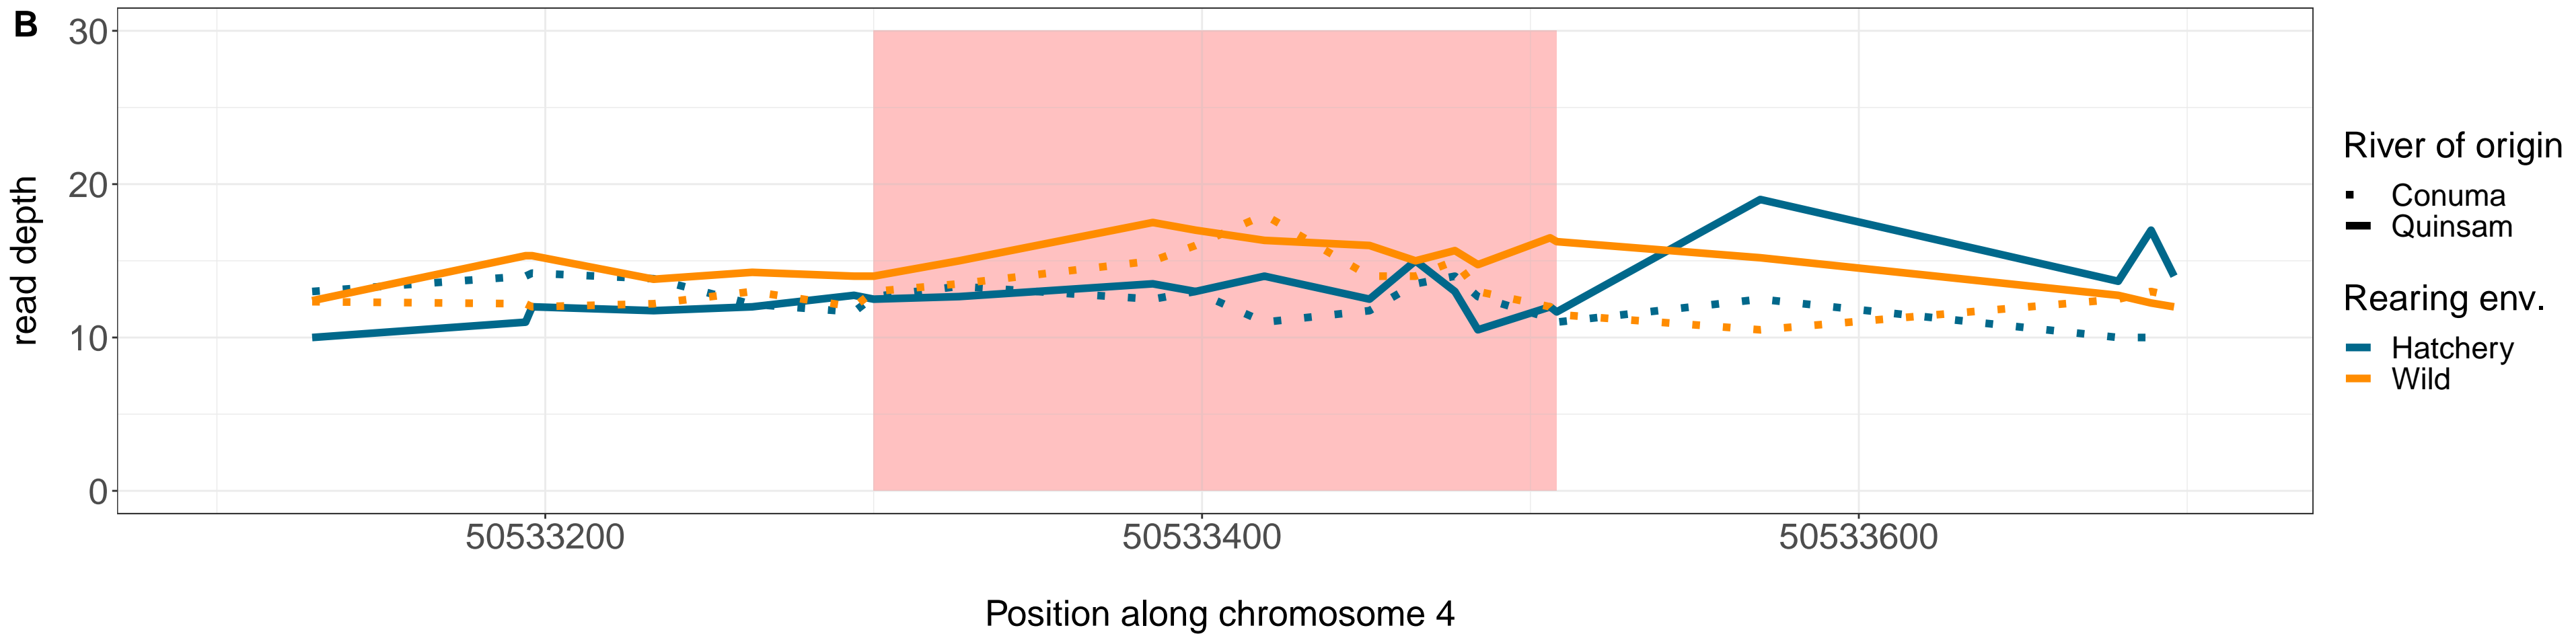

# DMR\_203

XM\_020476867.1

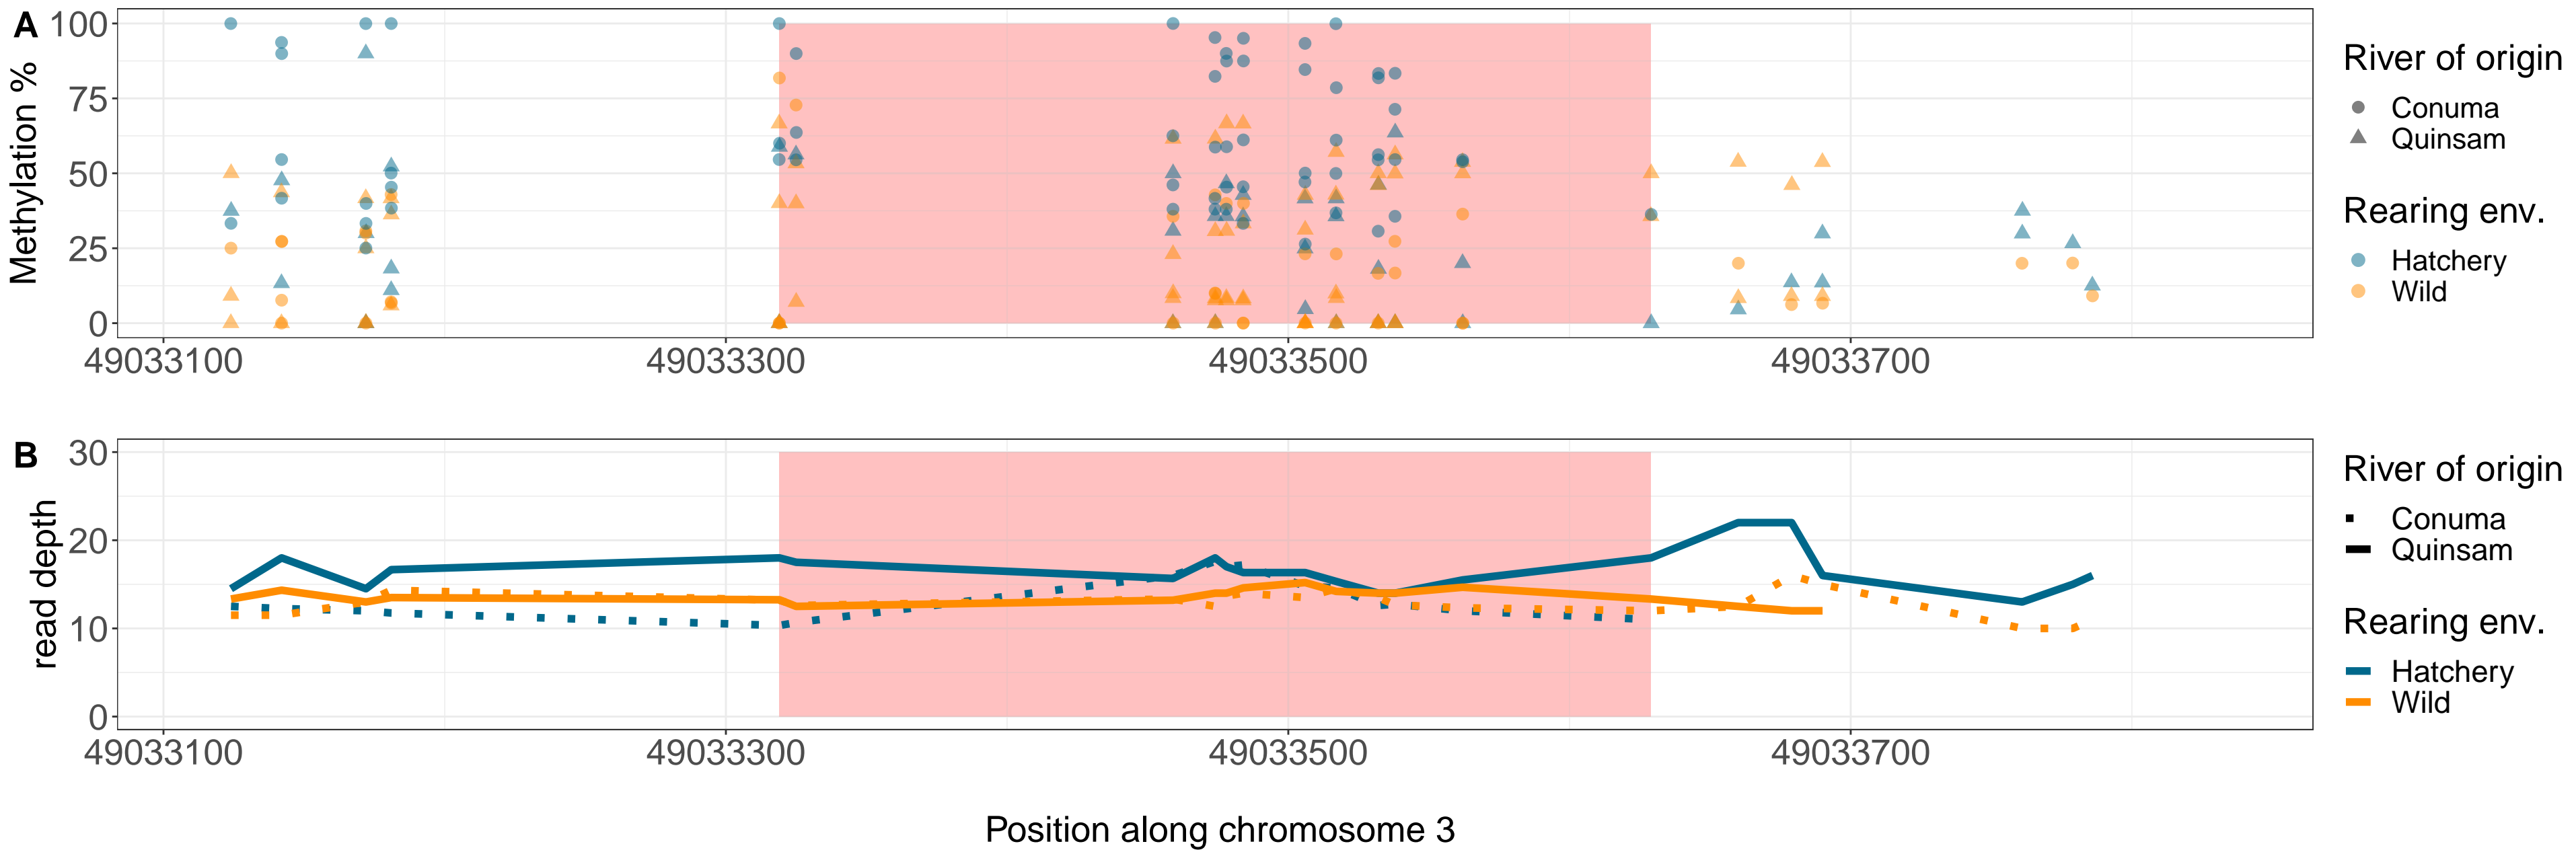

**A**

## DMR\_205

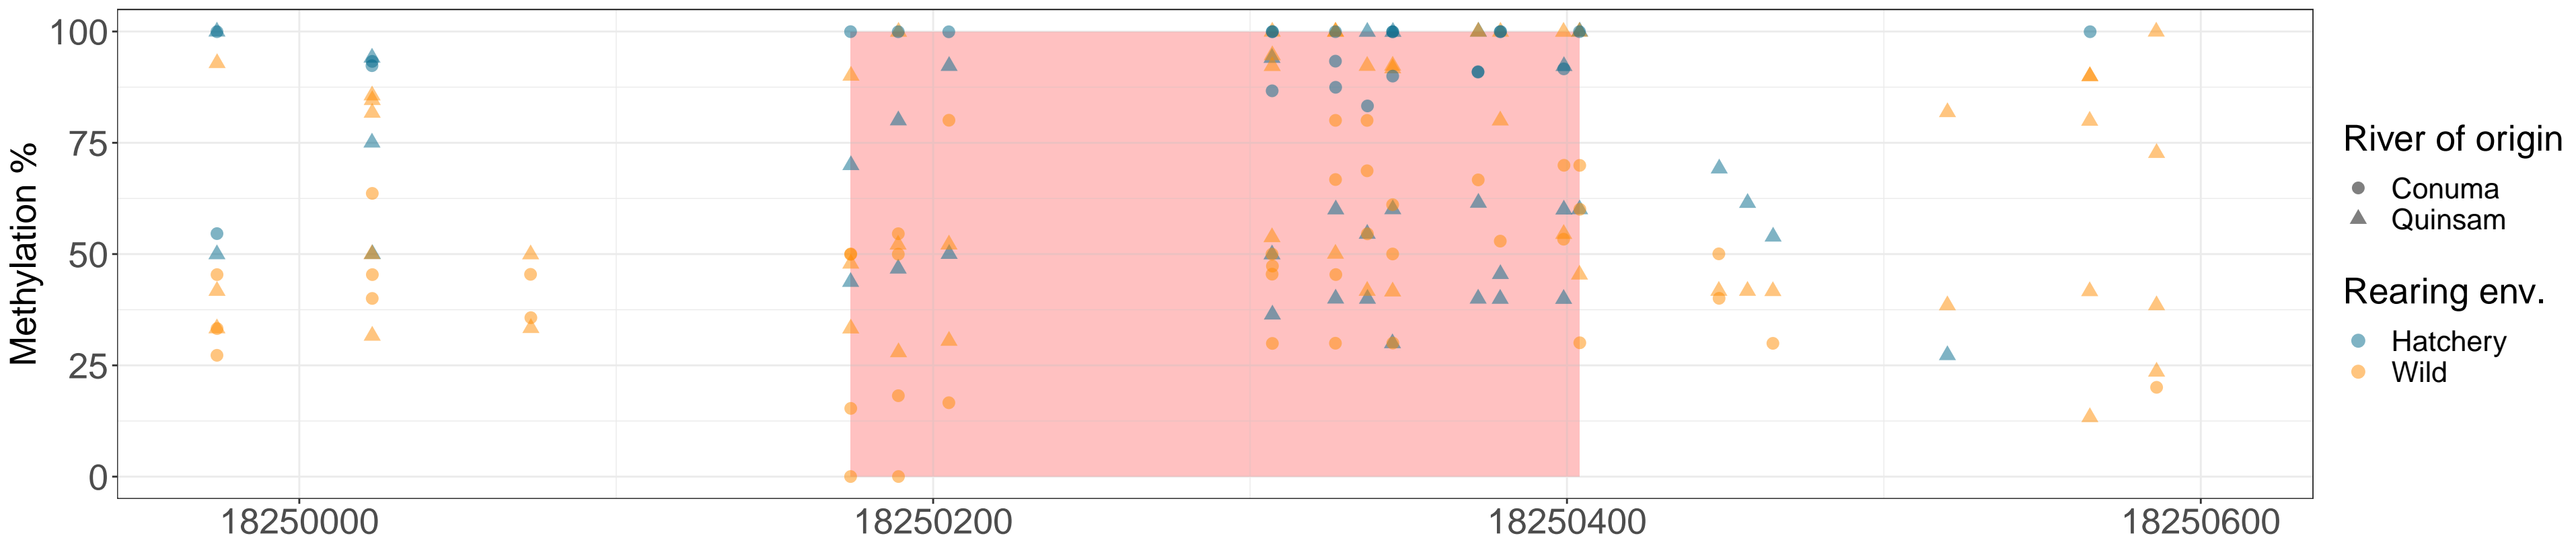**B**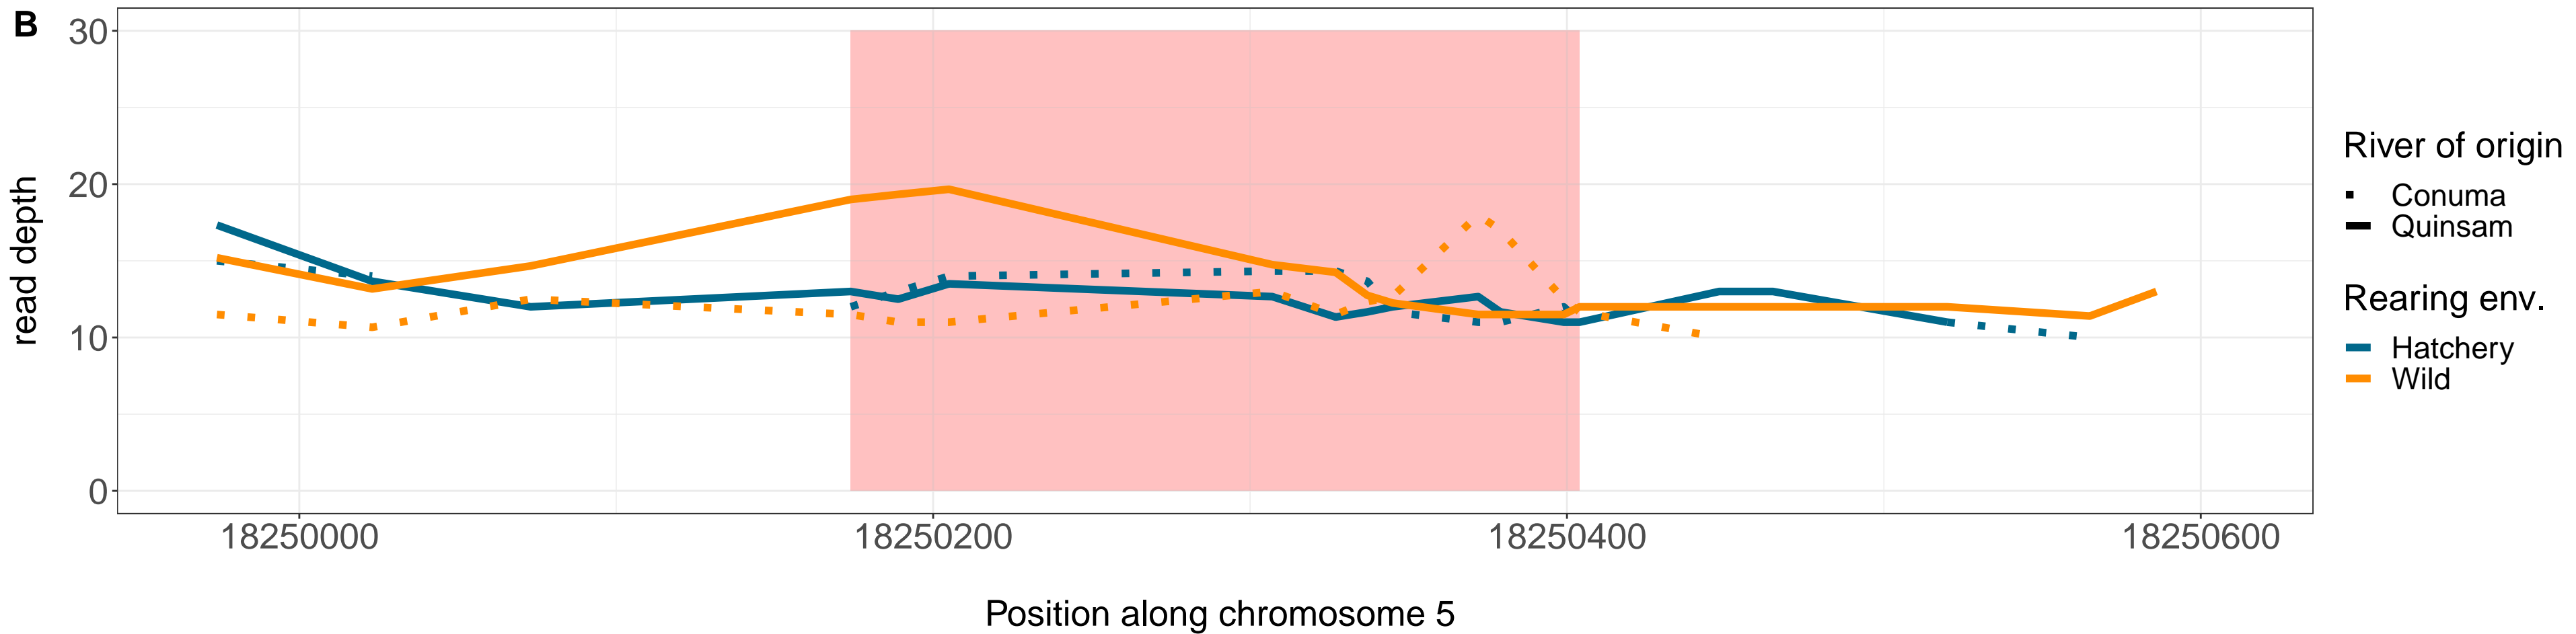

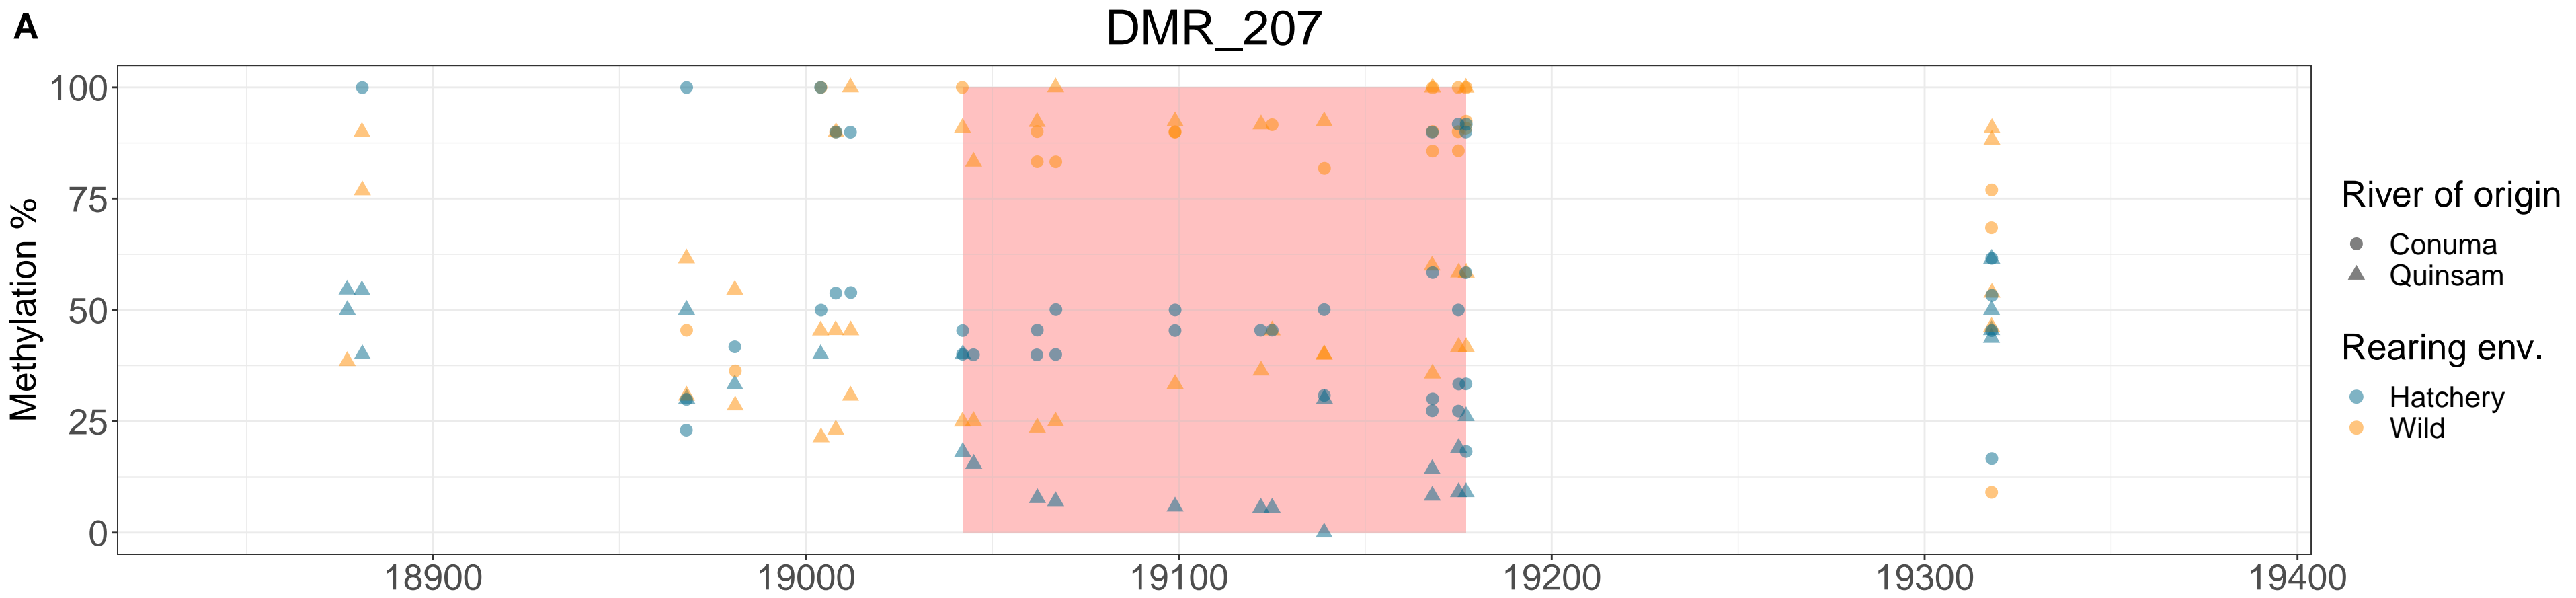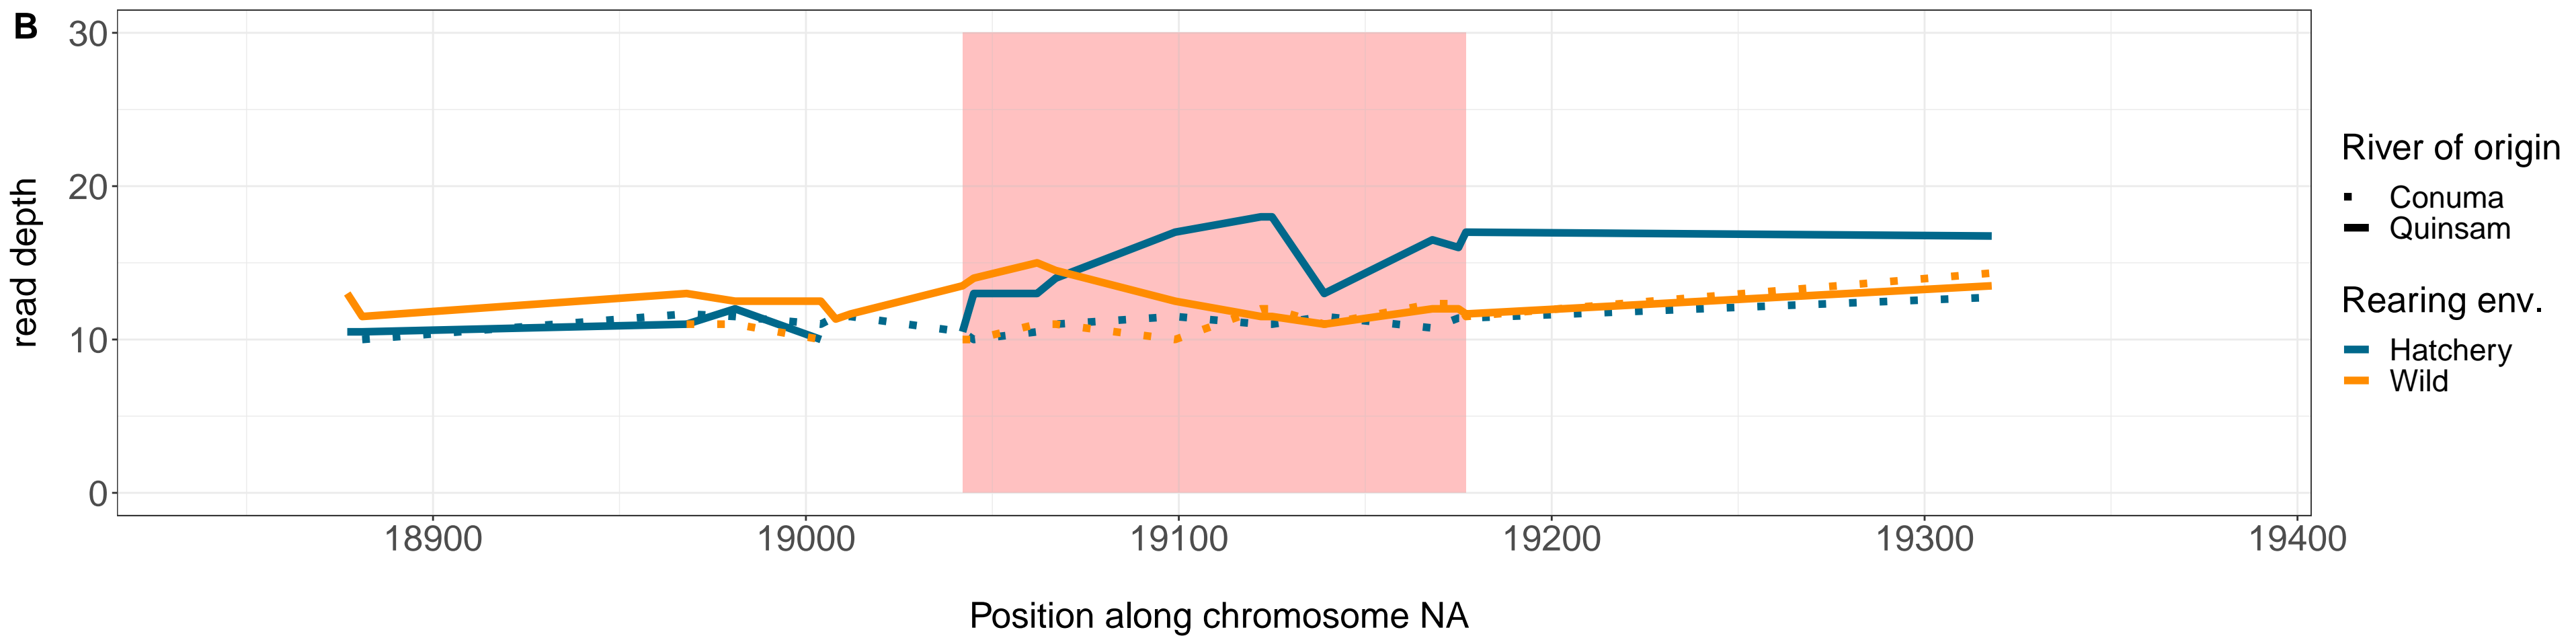

# DMR\_209

XM\_020483357.1

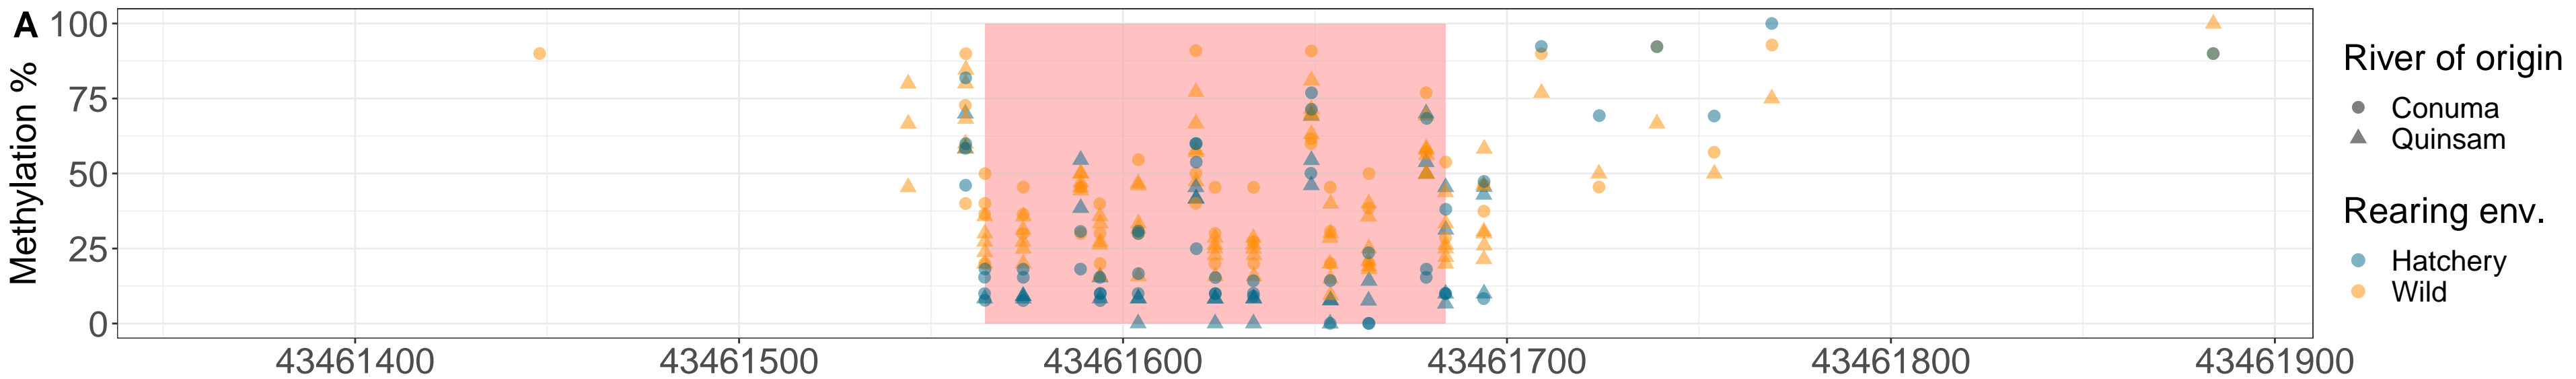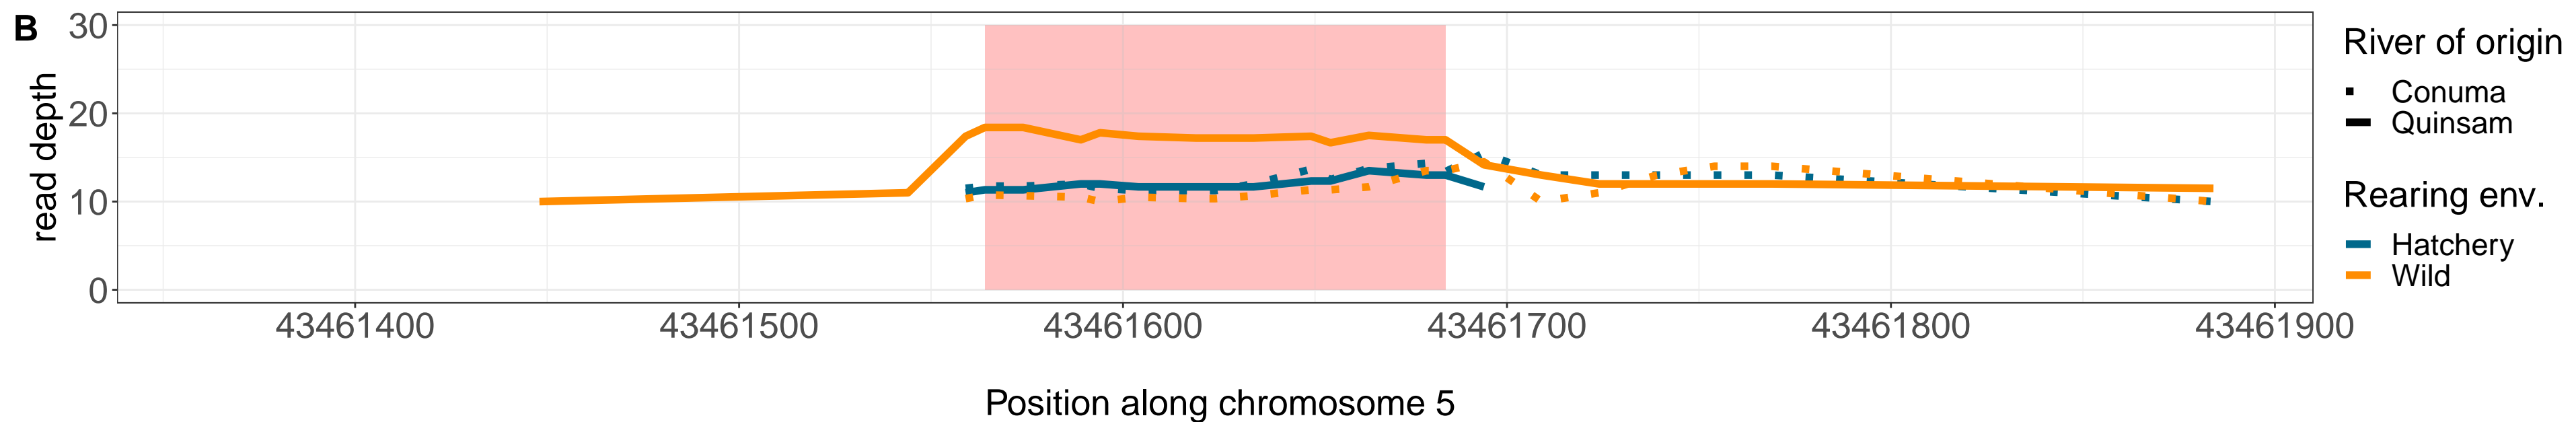

**A**

## DMR\_210

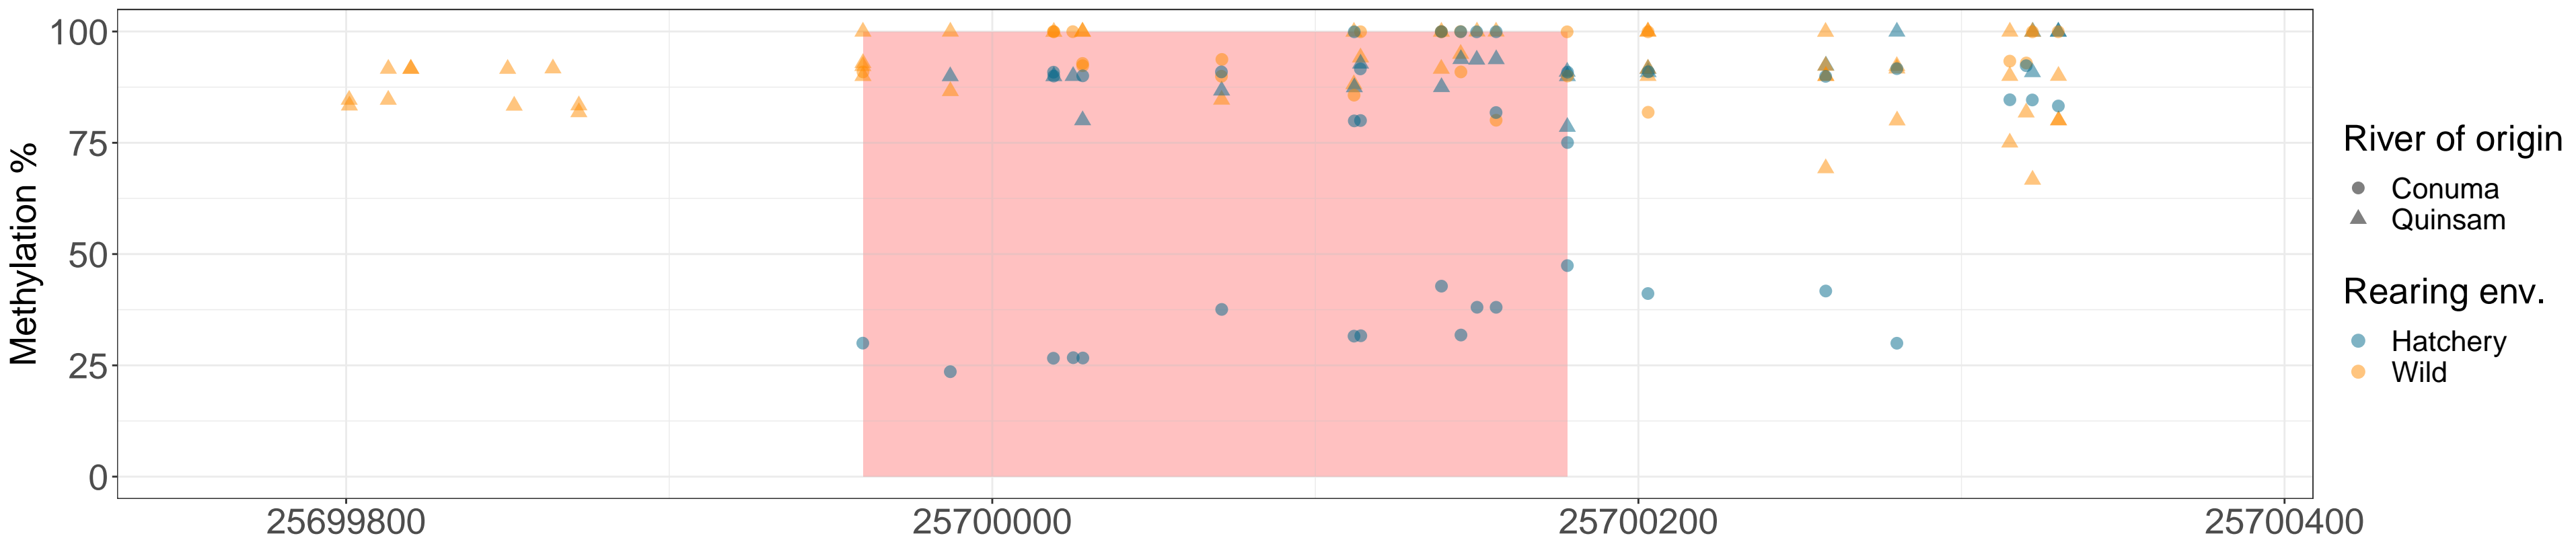**B**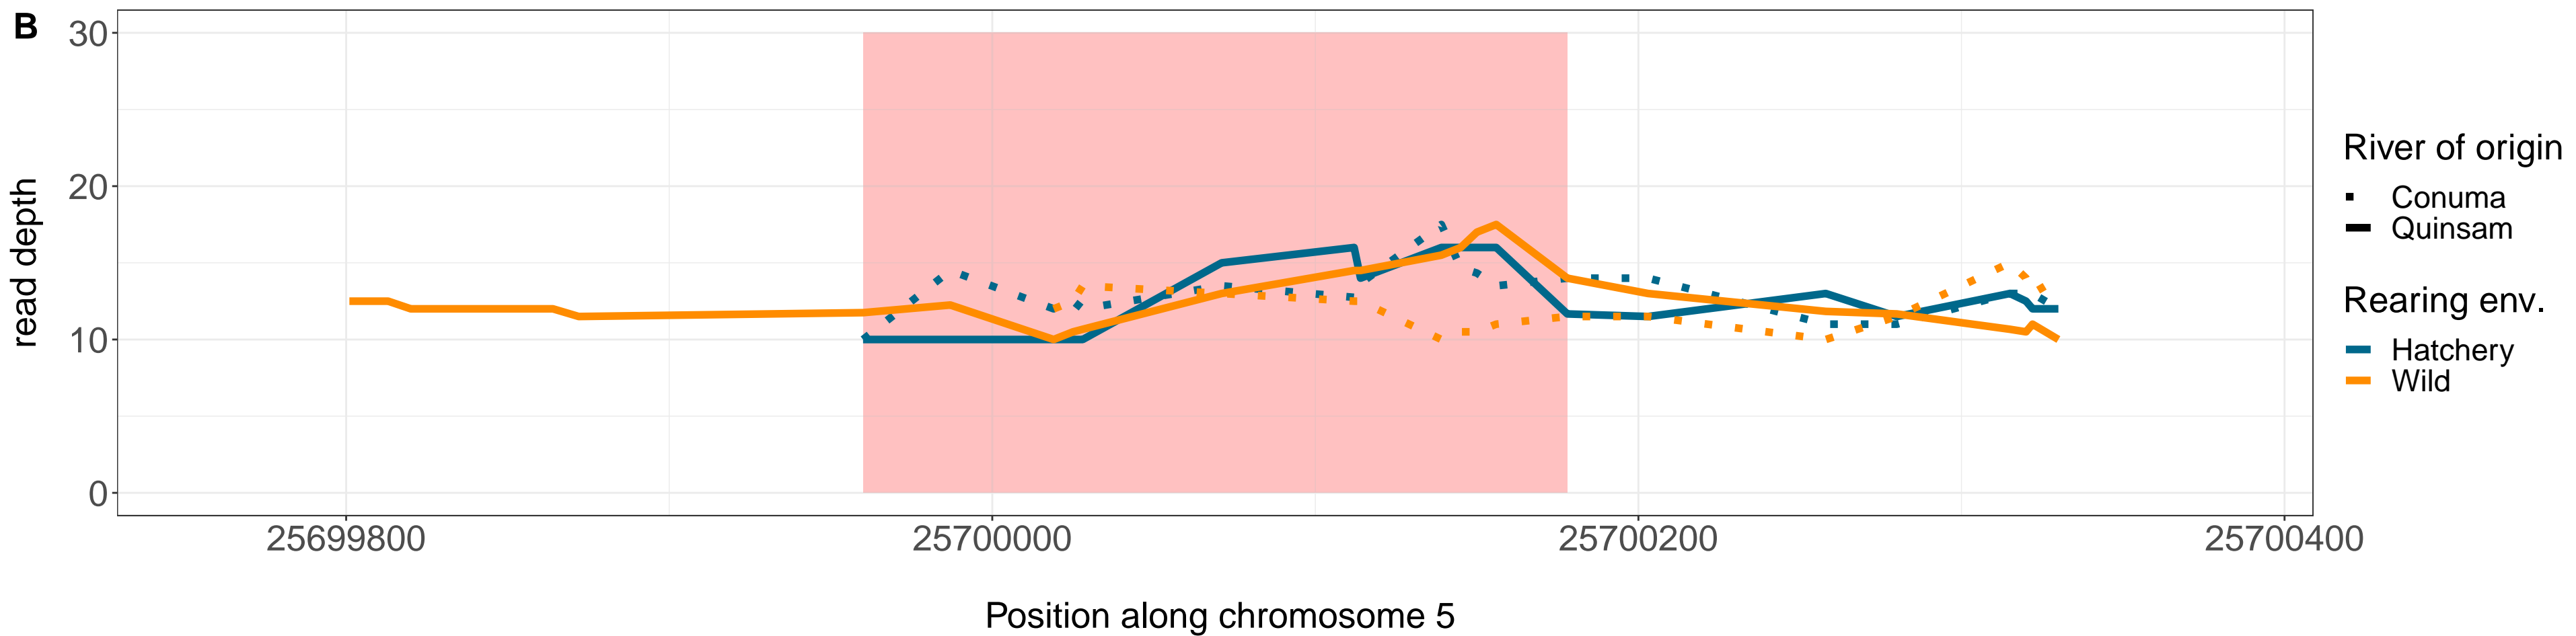

# DMR\_211

XM\_020485490.1

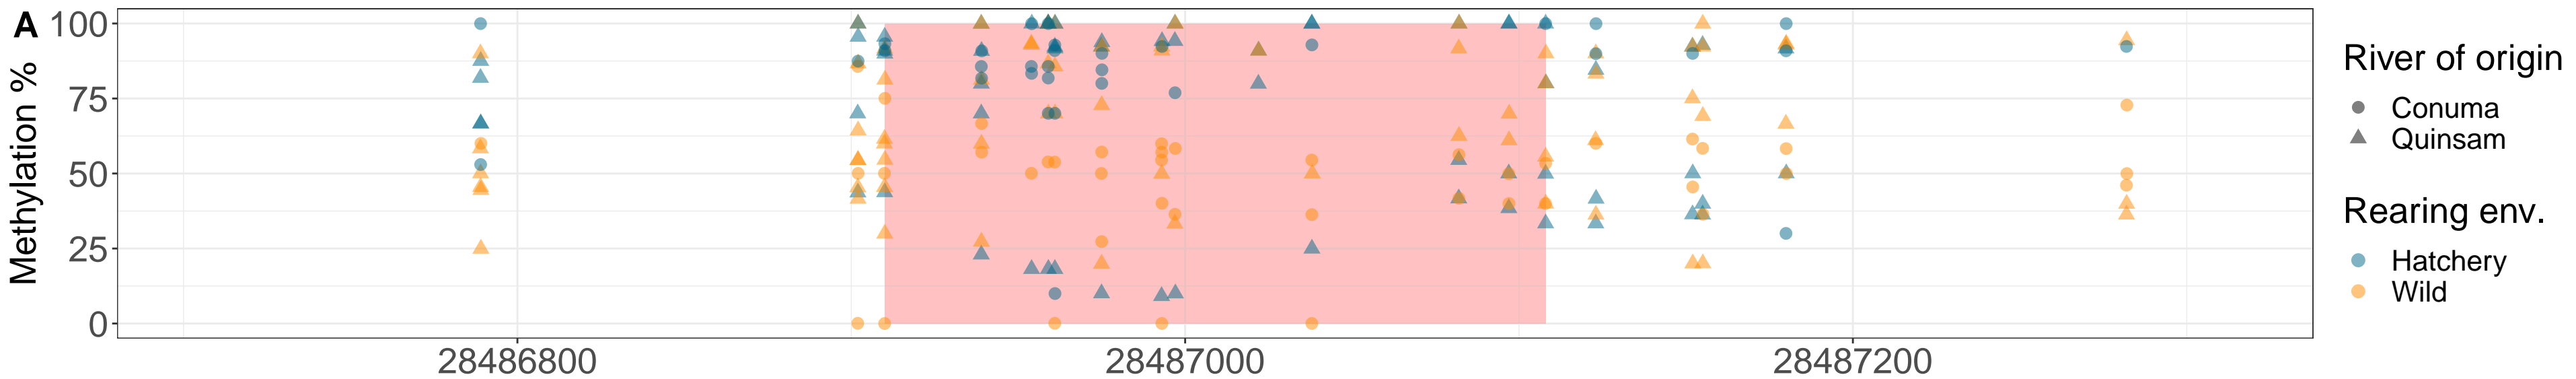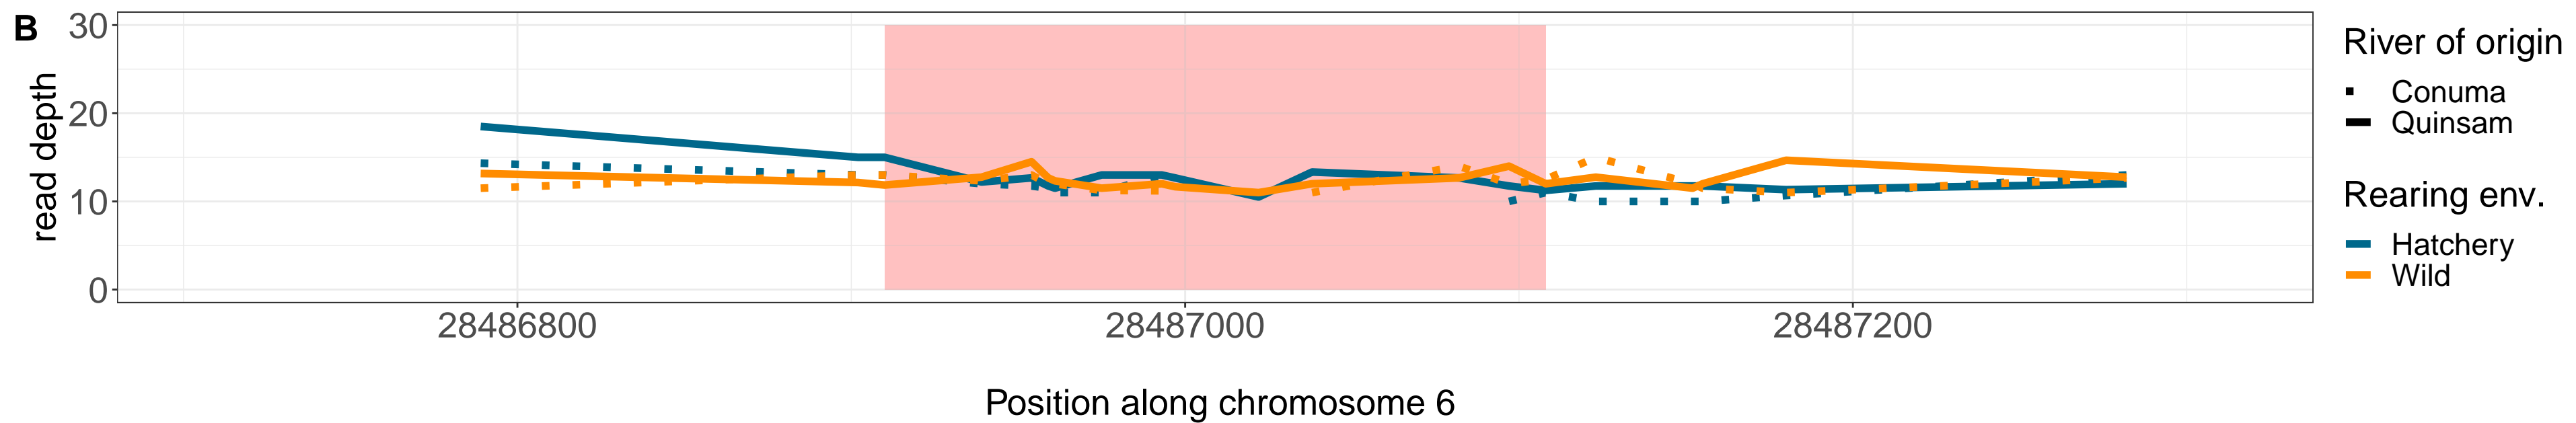

Supplement: EVA-14-2402-s001.pdf [file EVA-14-2402-s001.pdf]
