# Supplementary material for: Epigenomic modifications induced by hatchery rearing persist in germ line cells of adult salmon after their oceanic migration
Source: PubMed Central journal article supplement (PMC8549618; doi:10.1111/eva.13235), 2021-05-04
Supplement: EVA-14-2402-s003.pdf [file EVA-14-2402-s003.pdf]

# DMR\_1

XM\_020458937.1

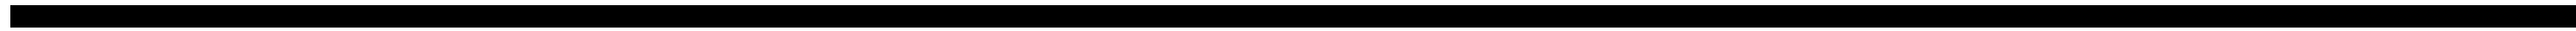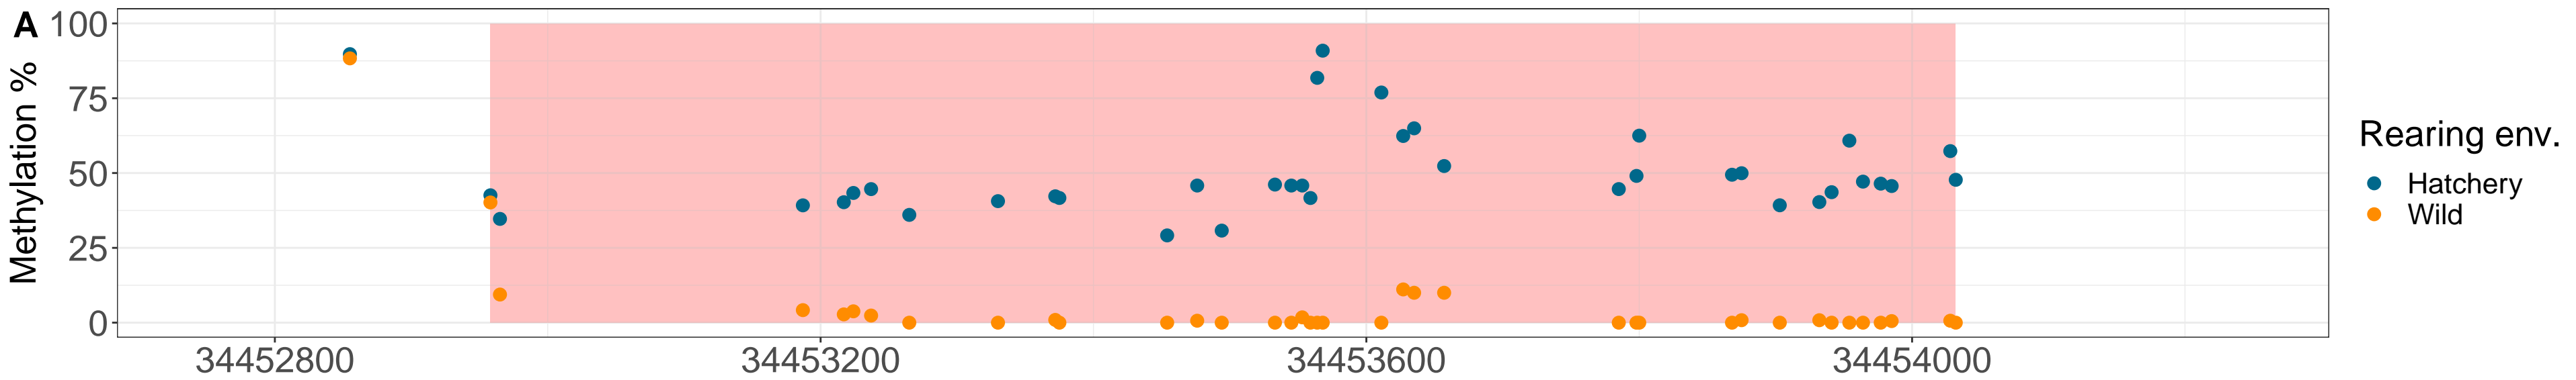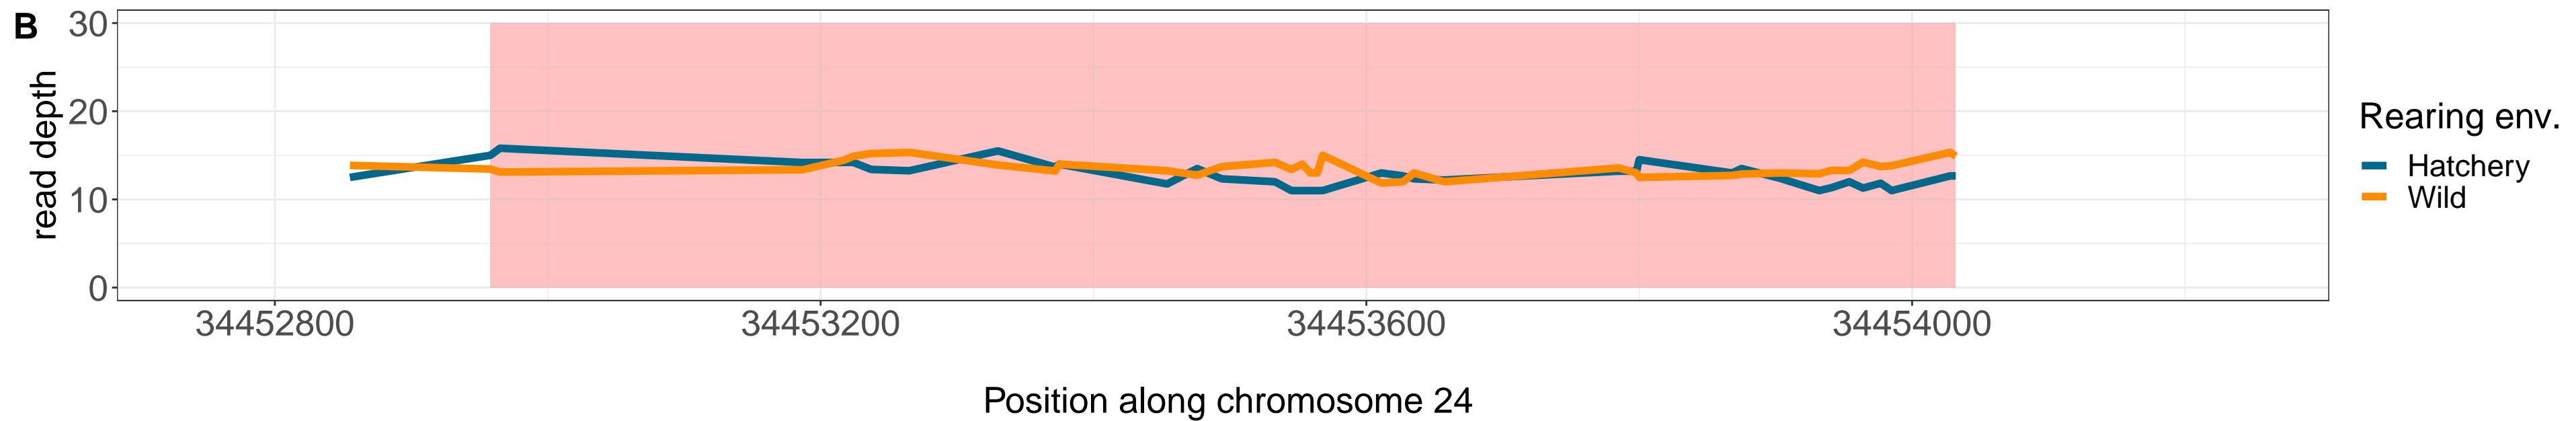

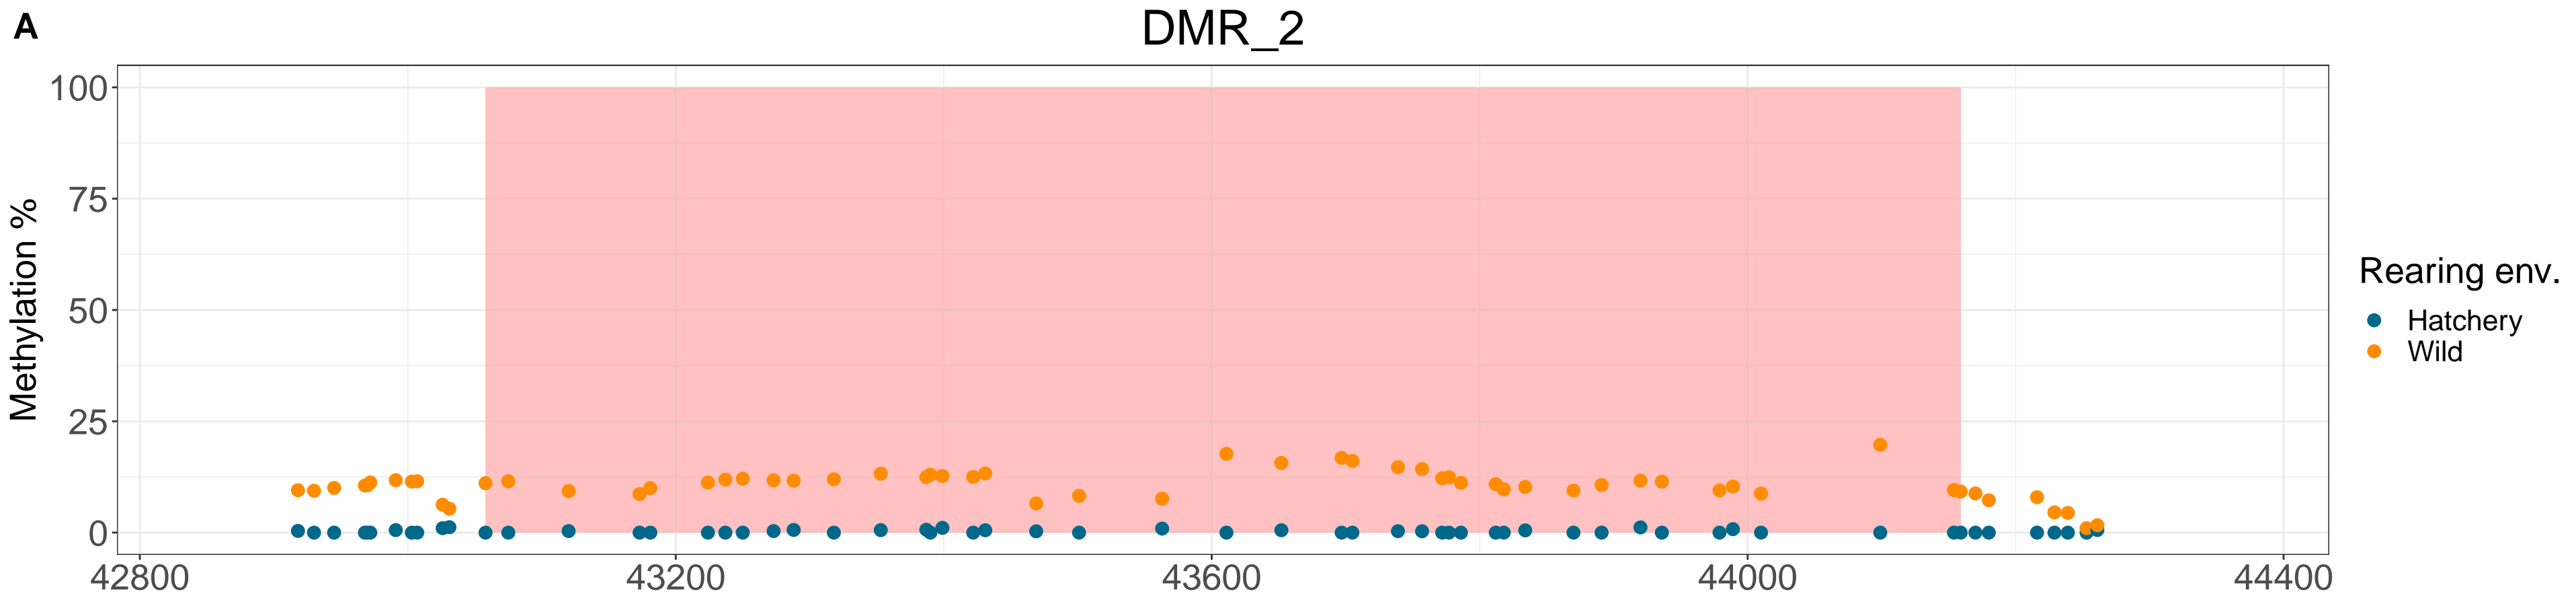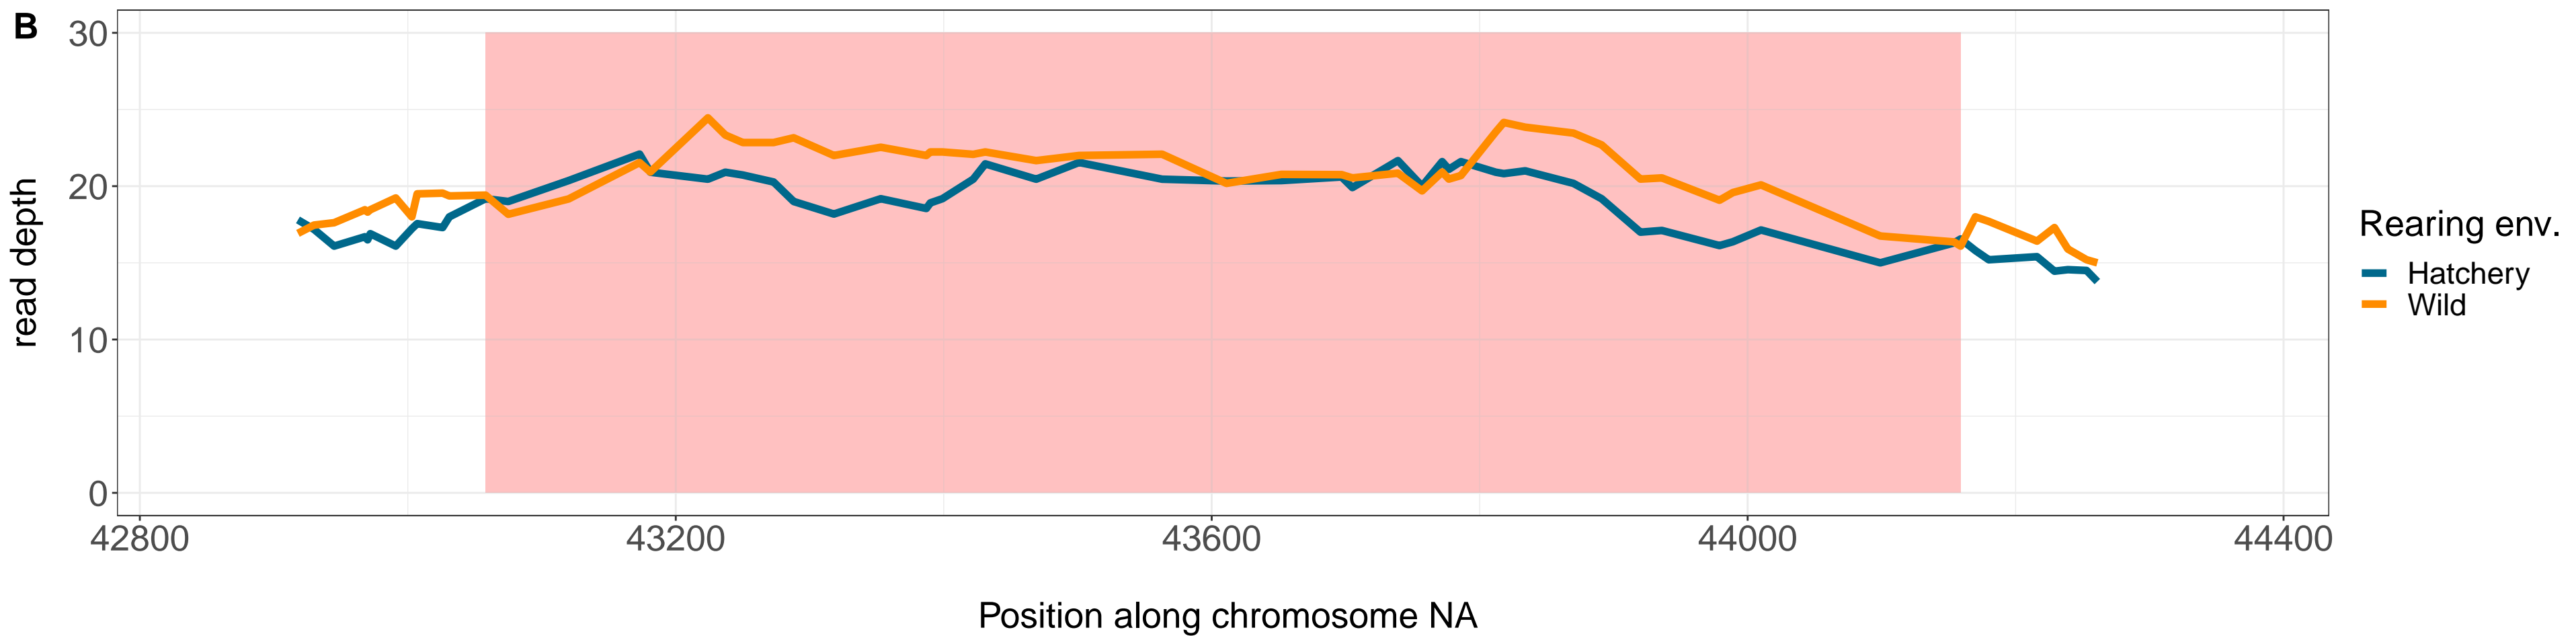

# DMR\_3

XM\_020497426.1

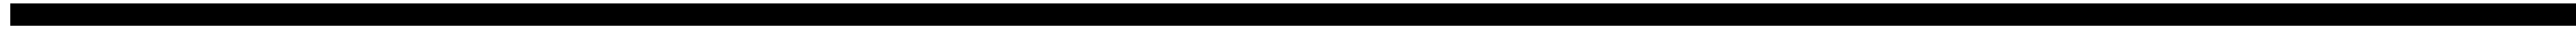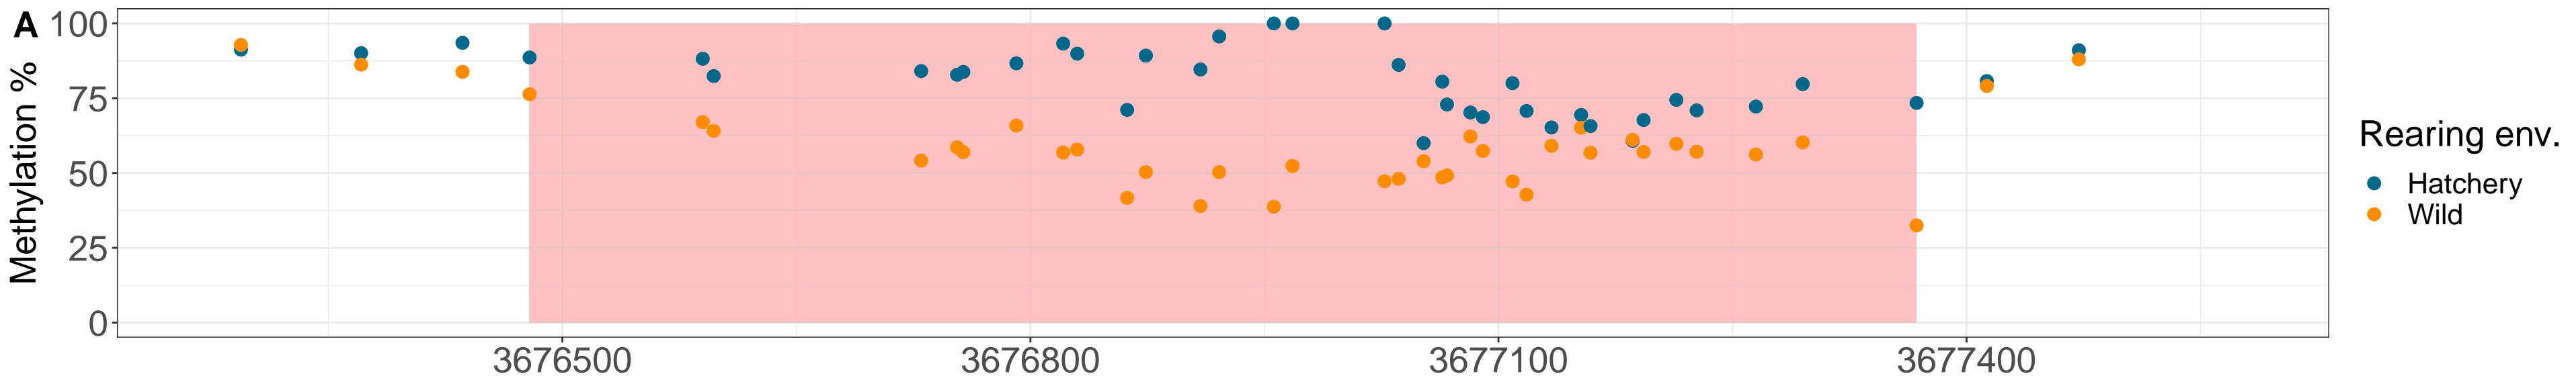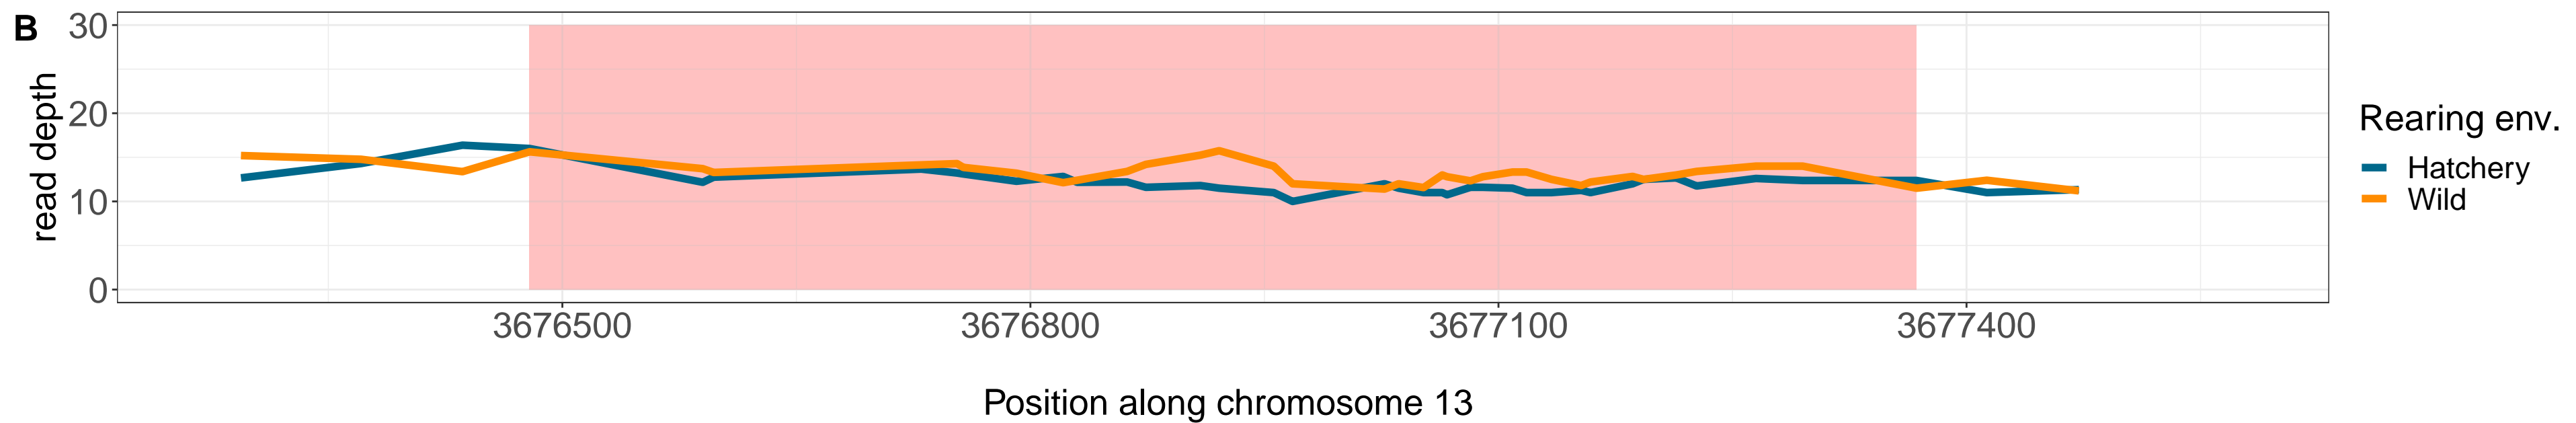

**A**

## DMR\_4

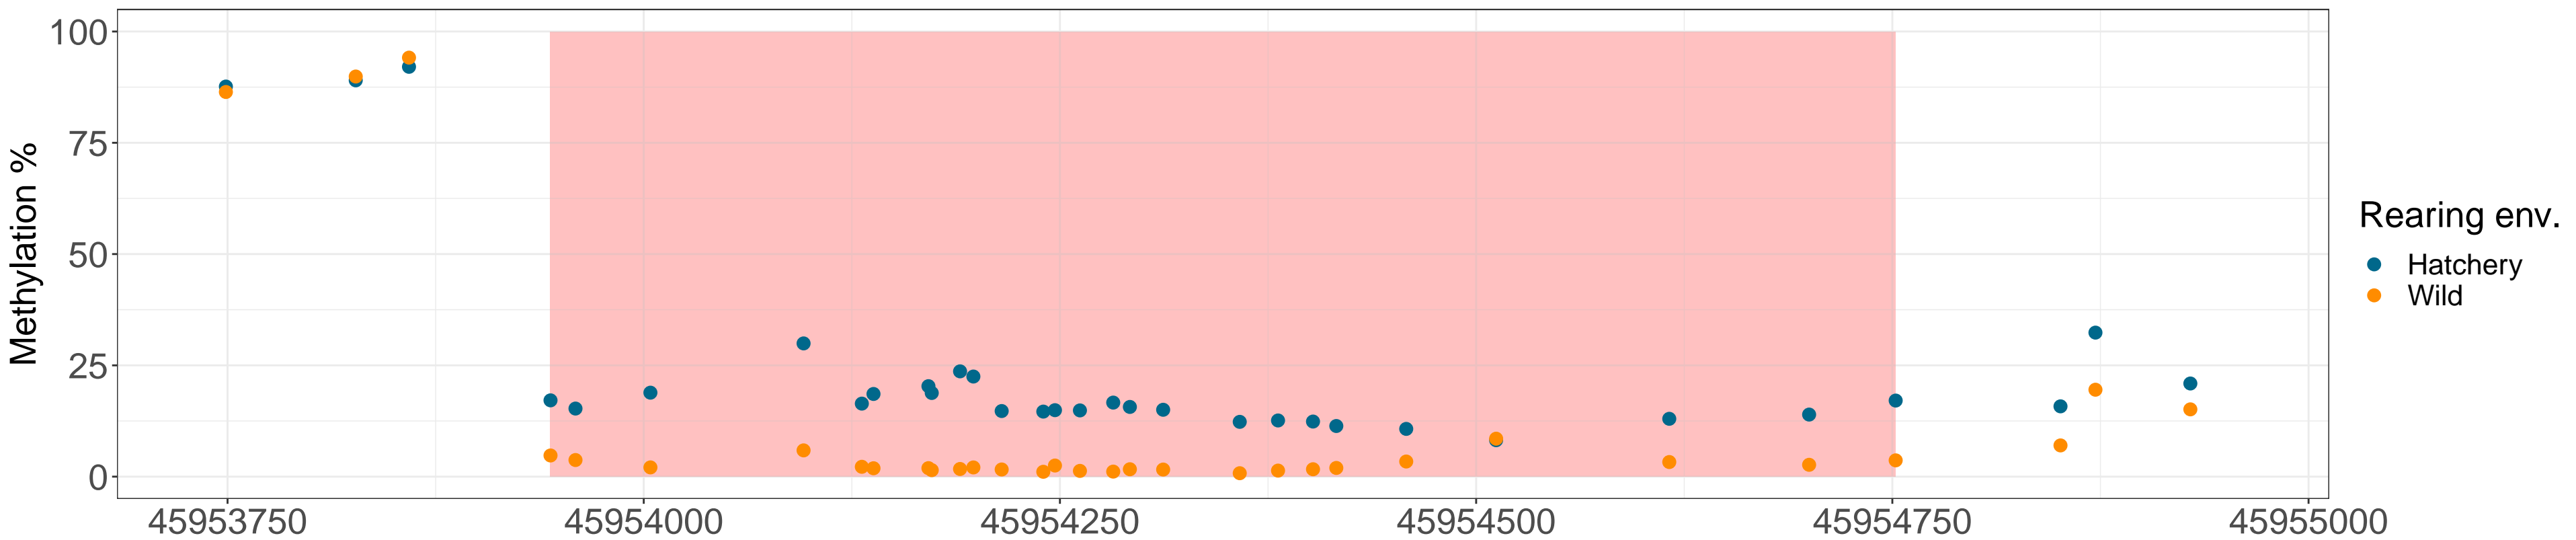**B**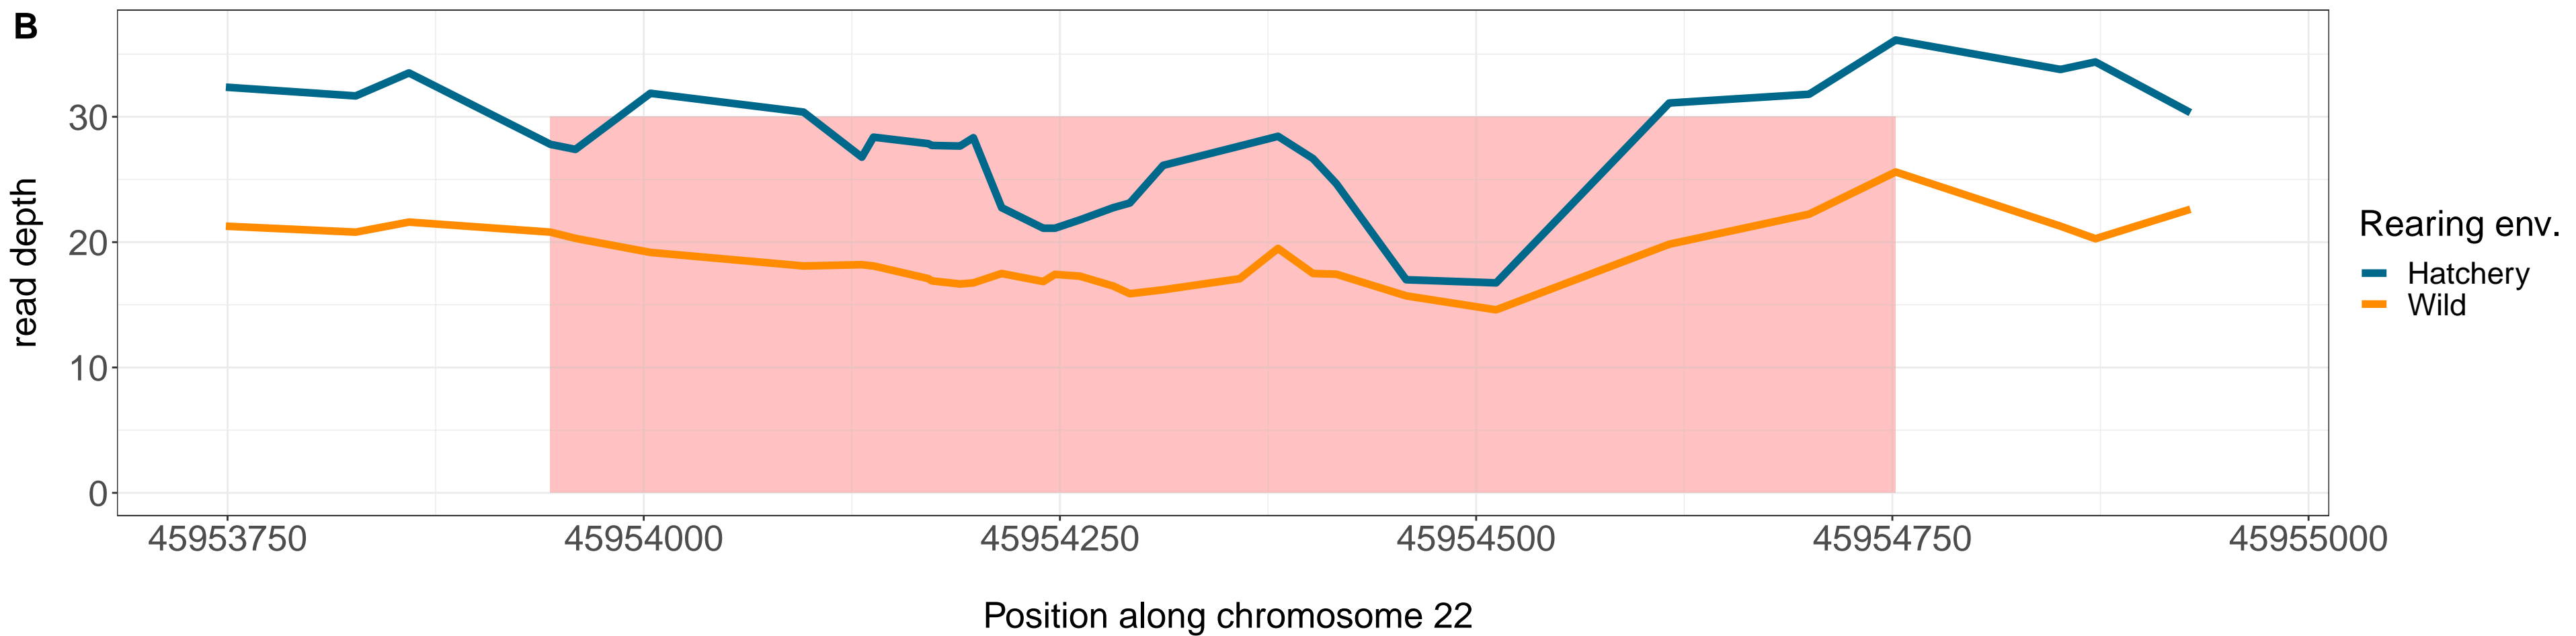

**A**

## DMR\_5

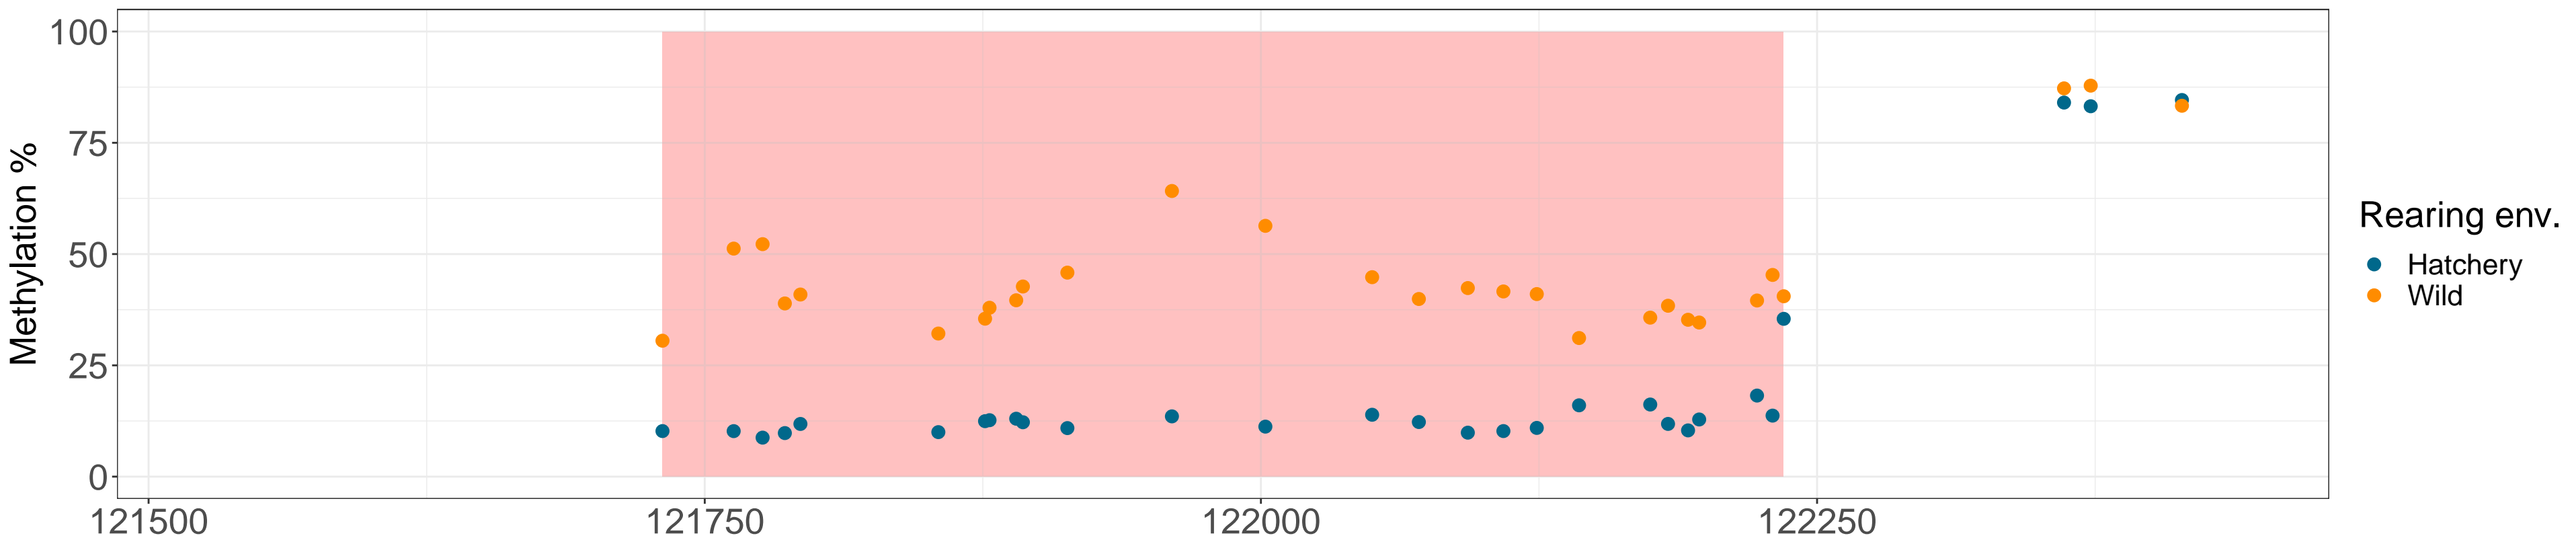**B**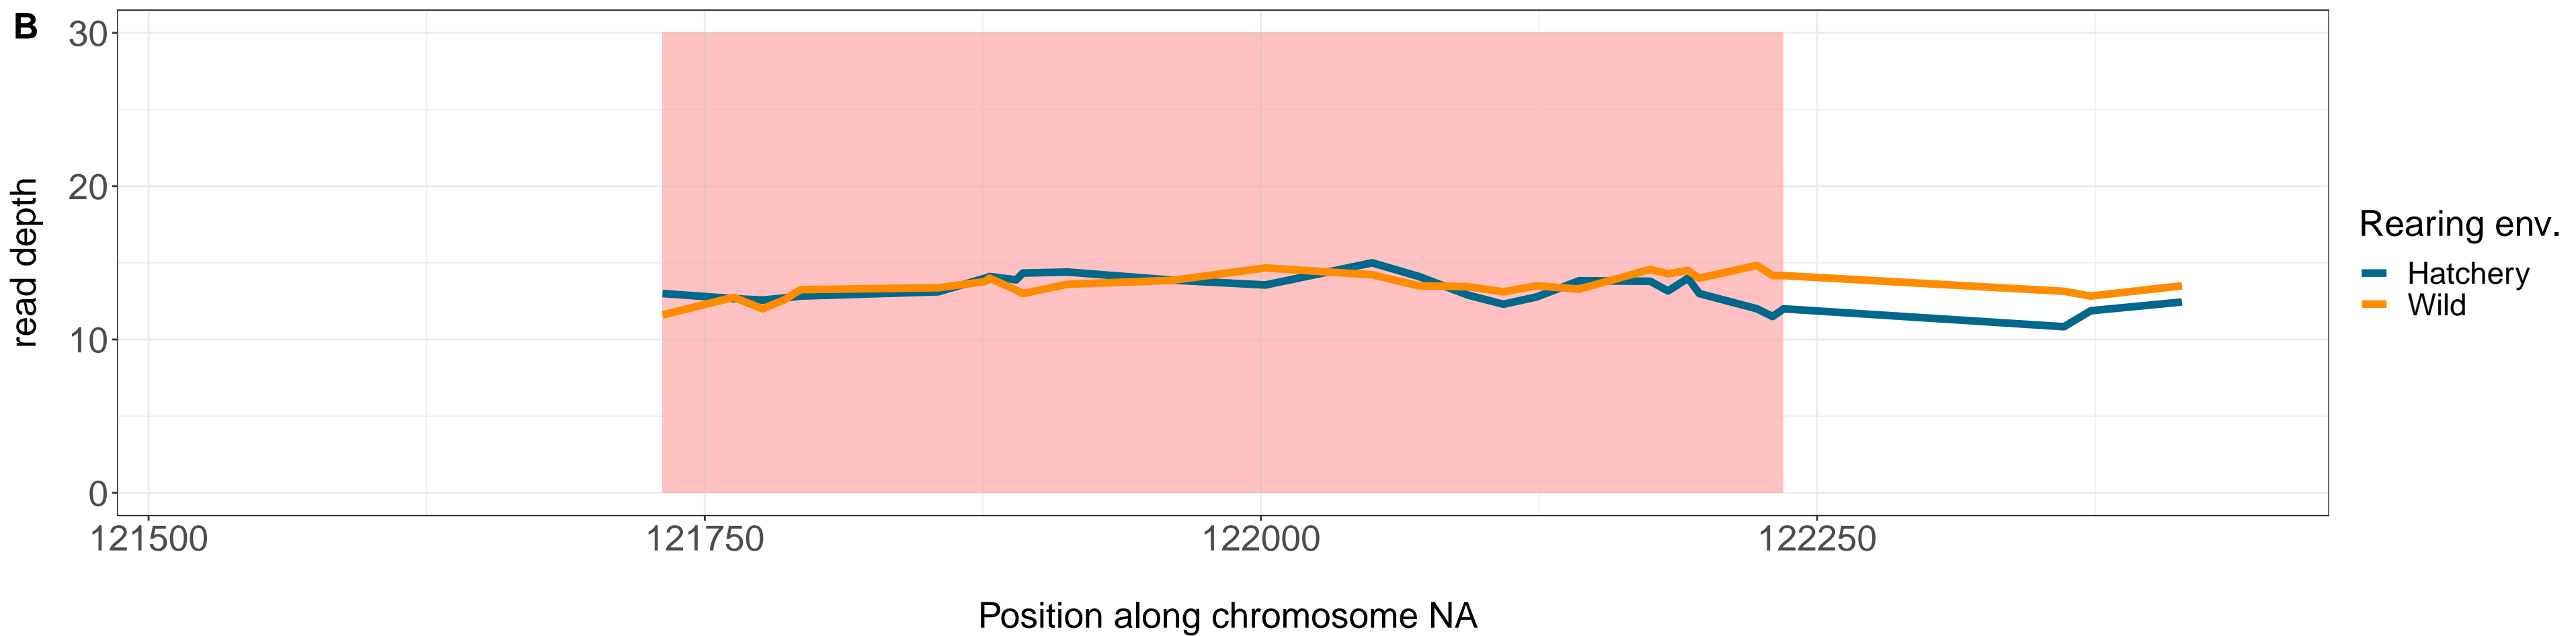

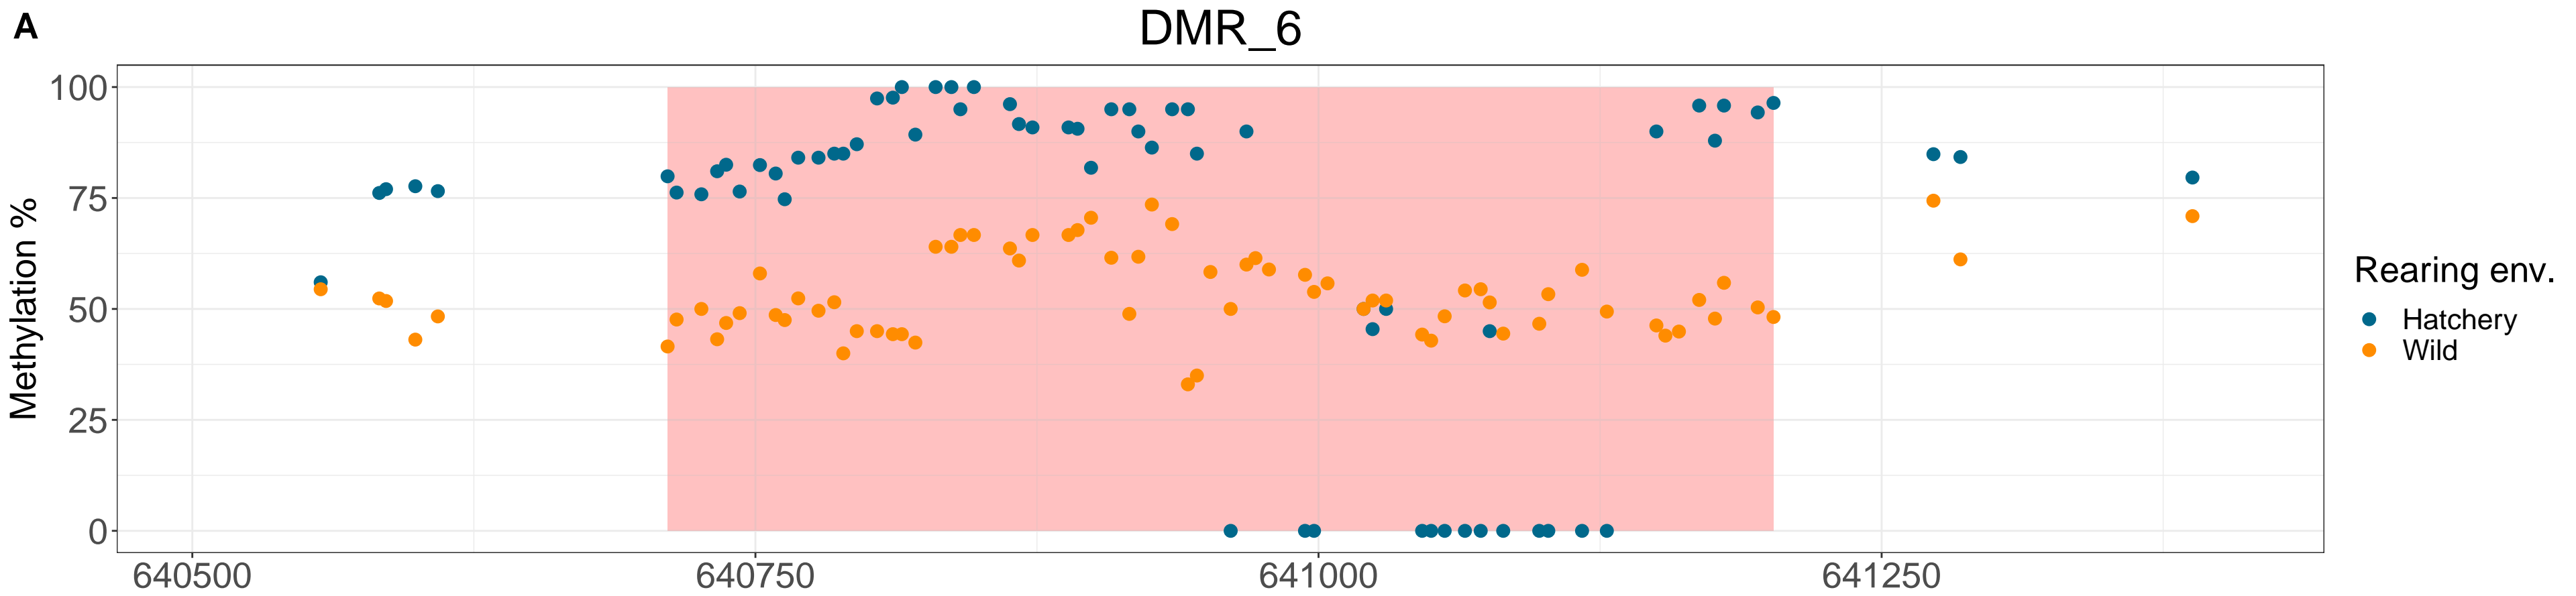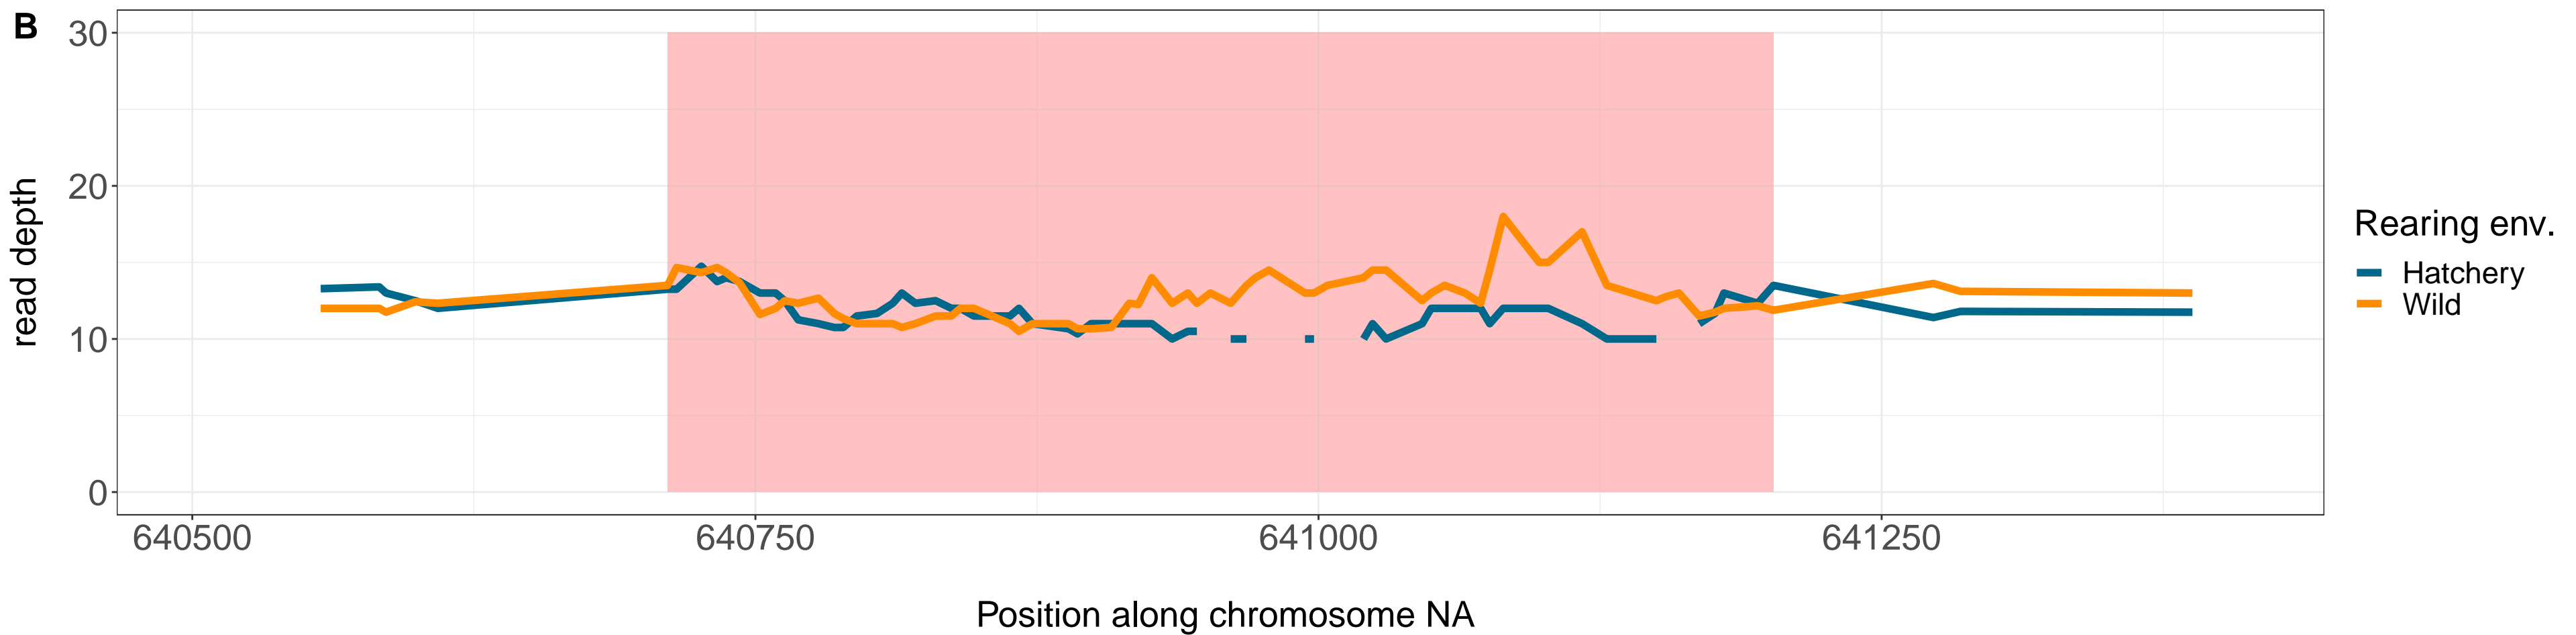

**A**

DMR\_7

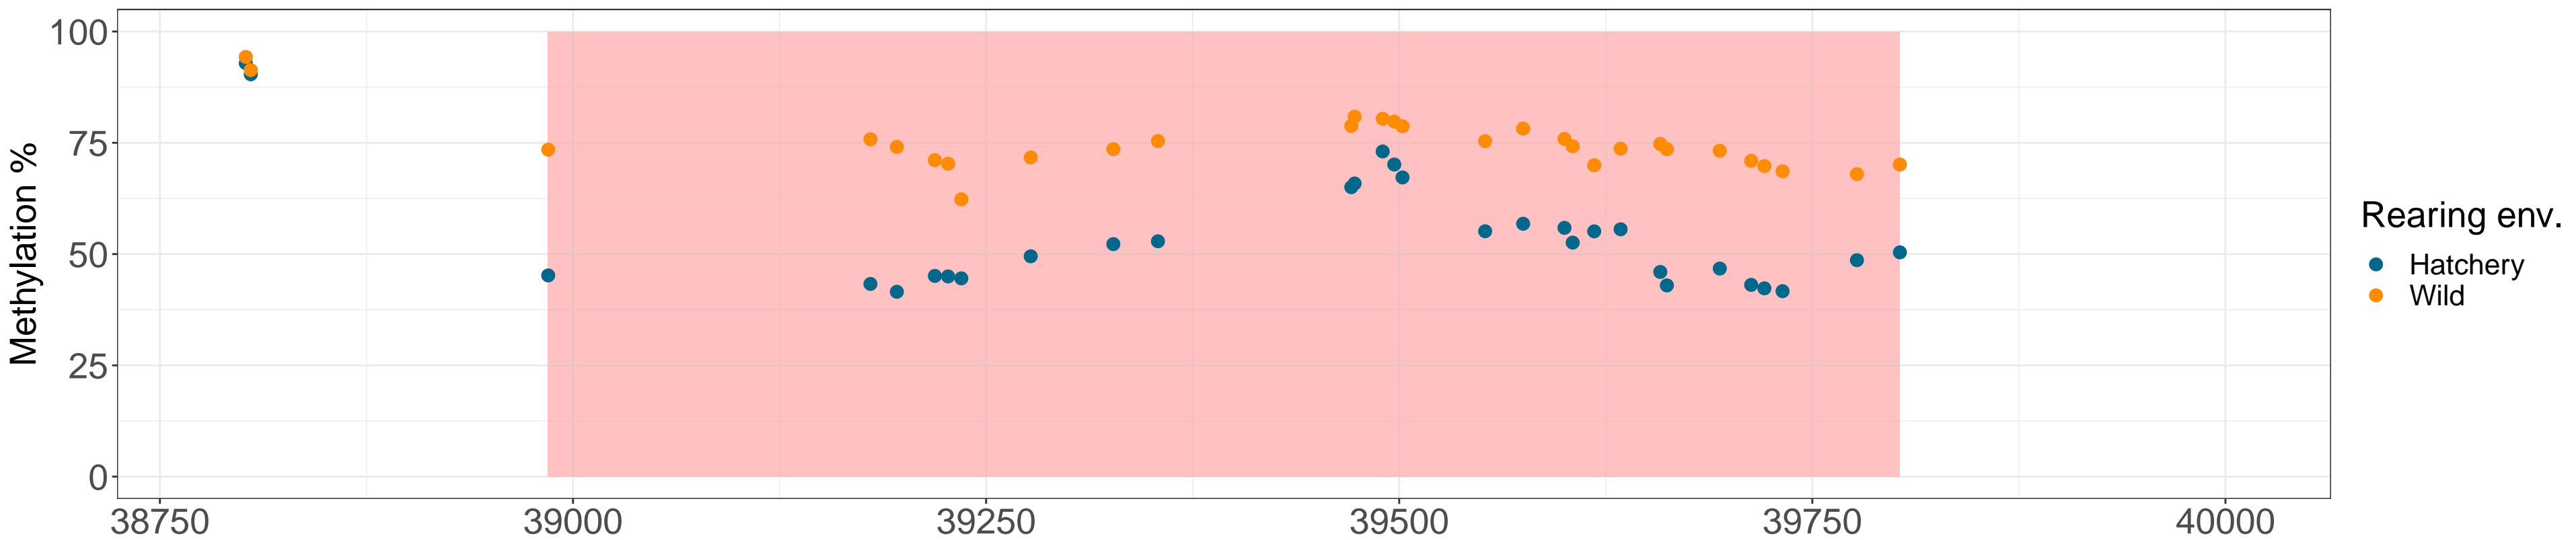**B**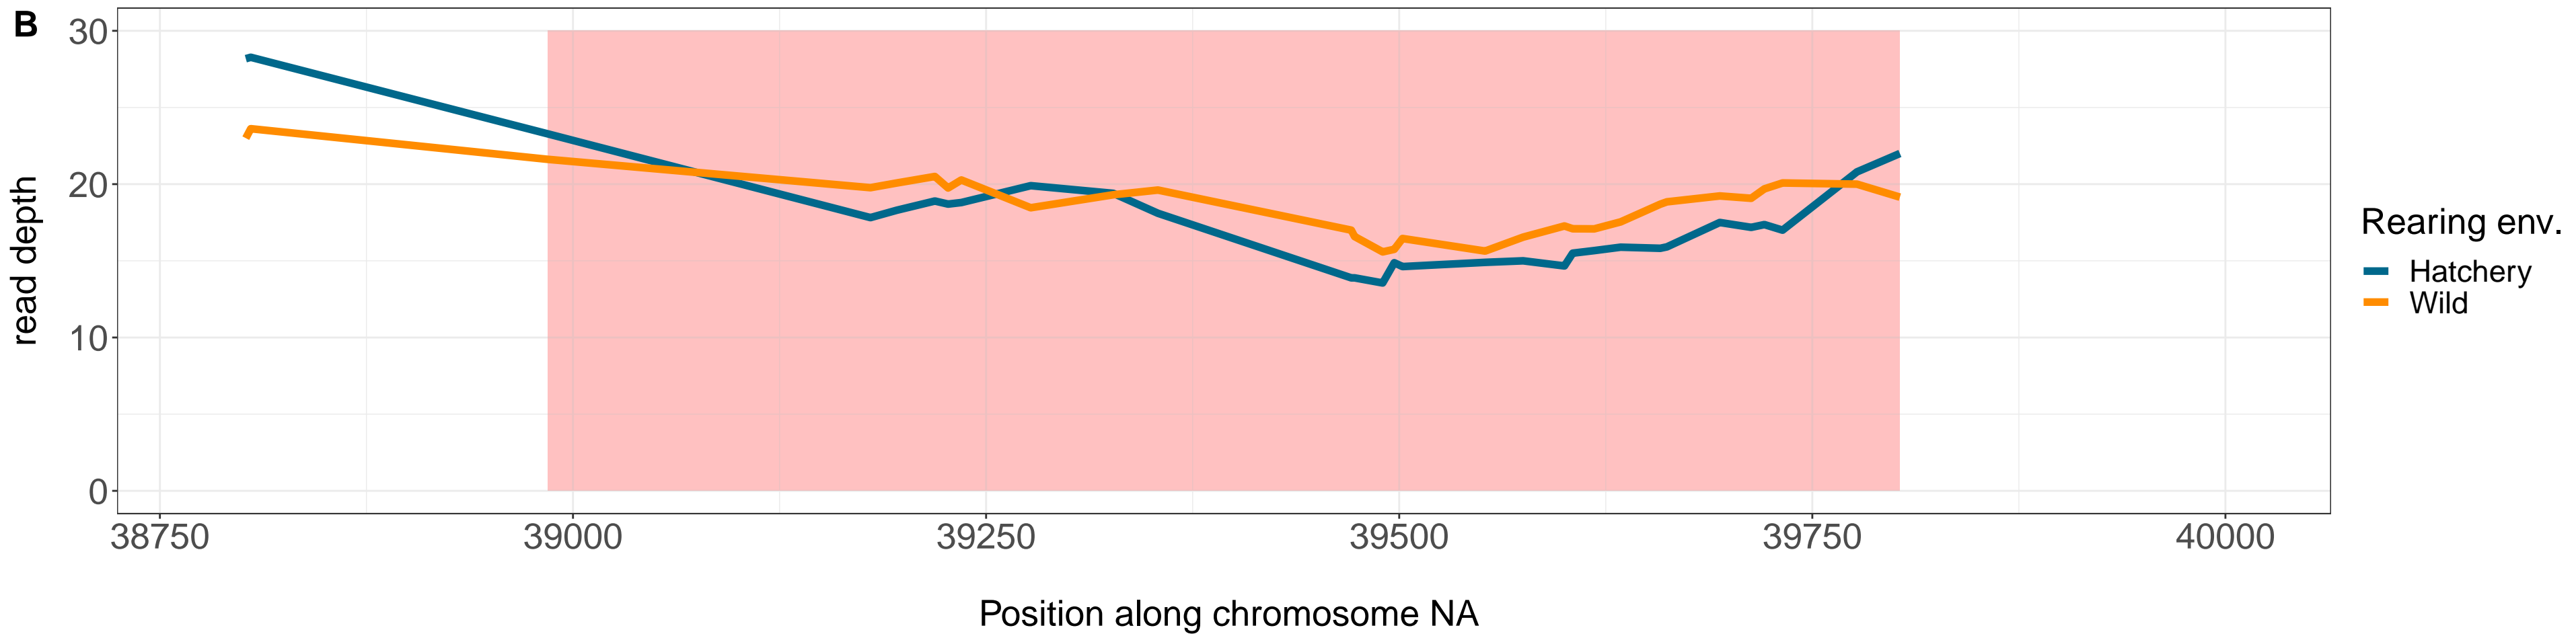

**A**

DMR\_8

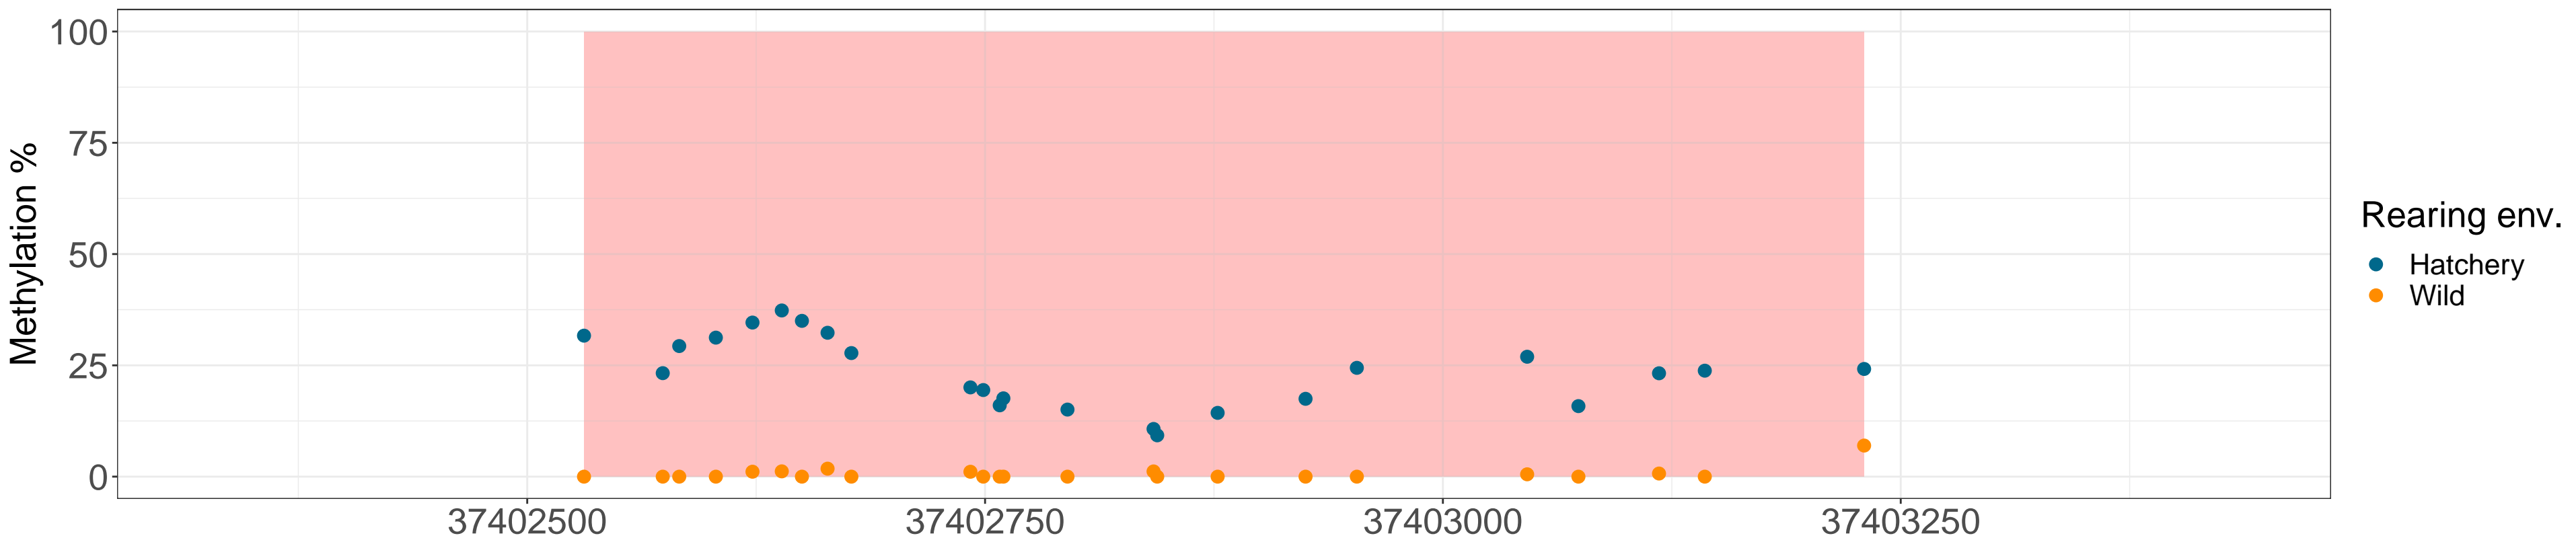**B**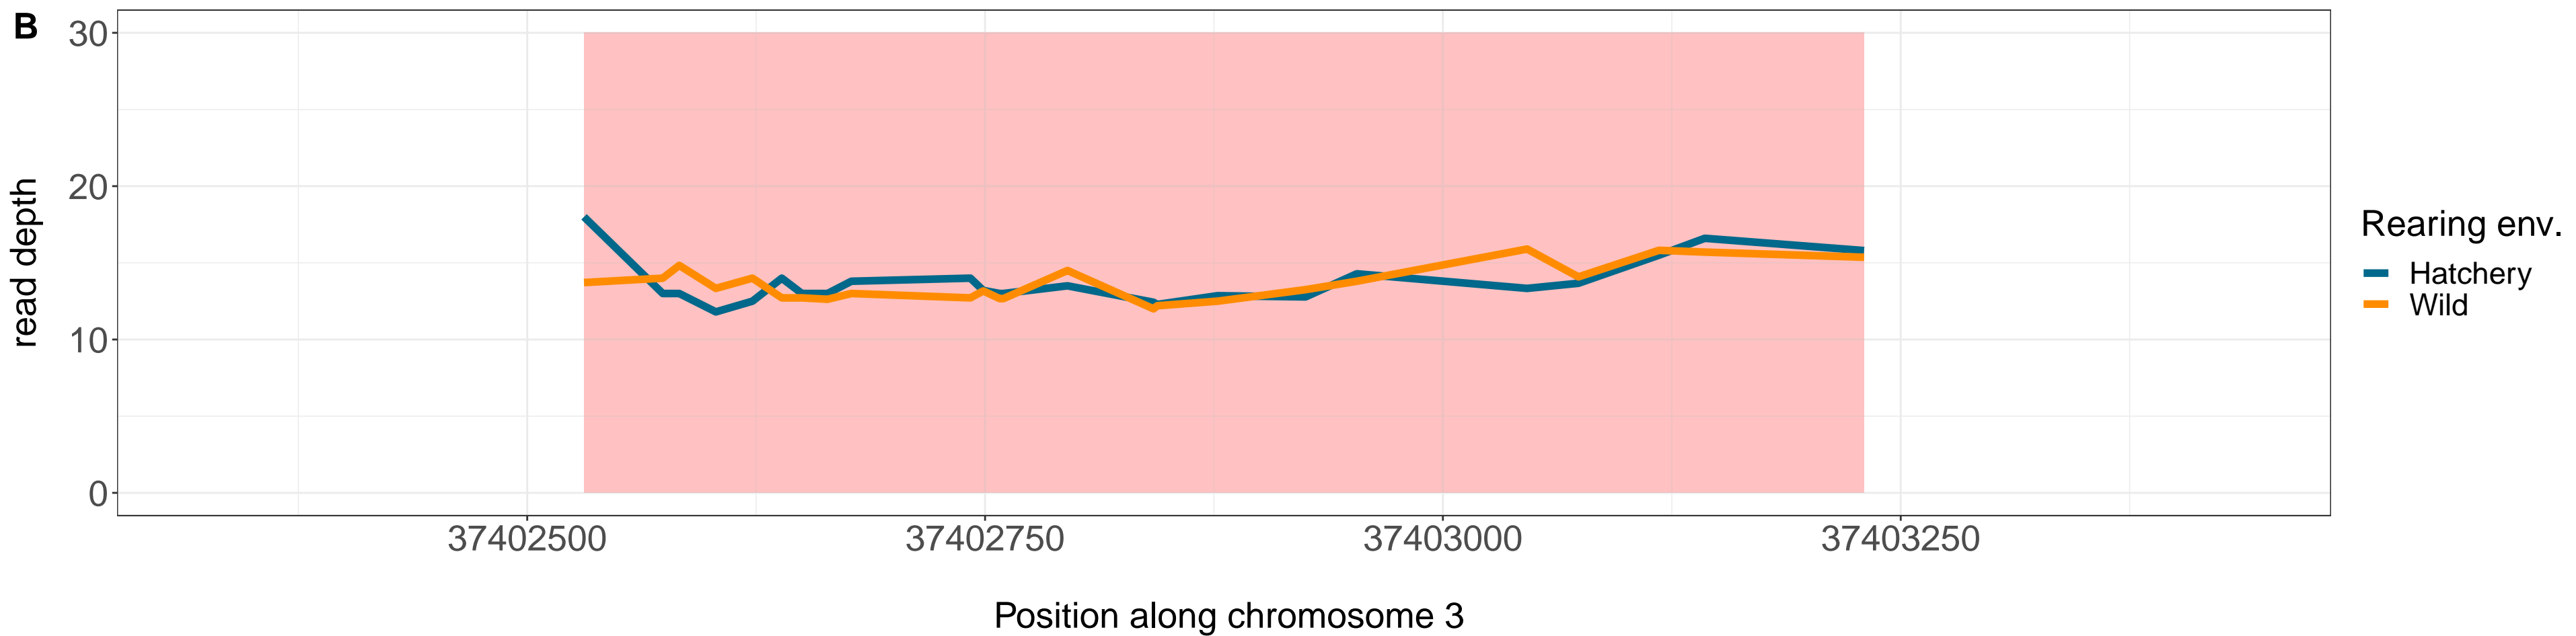



# DMR\_9

XR\_002255532.1

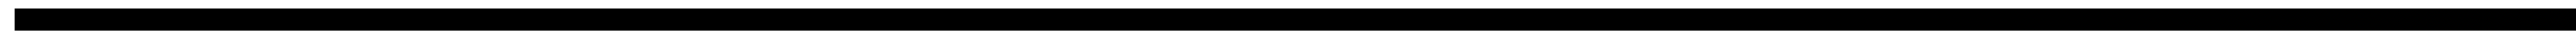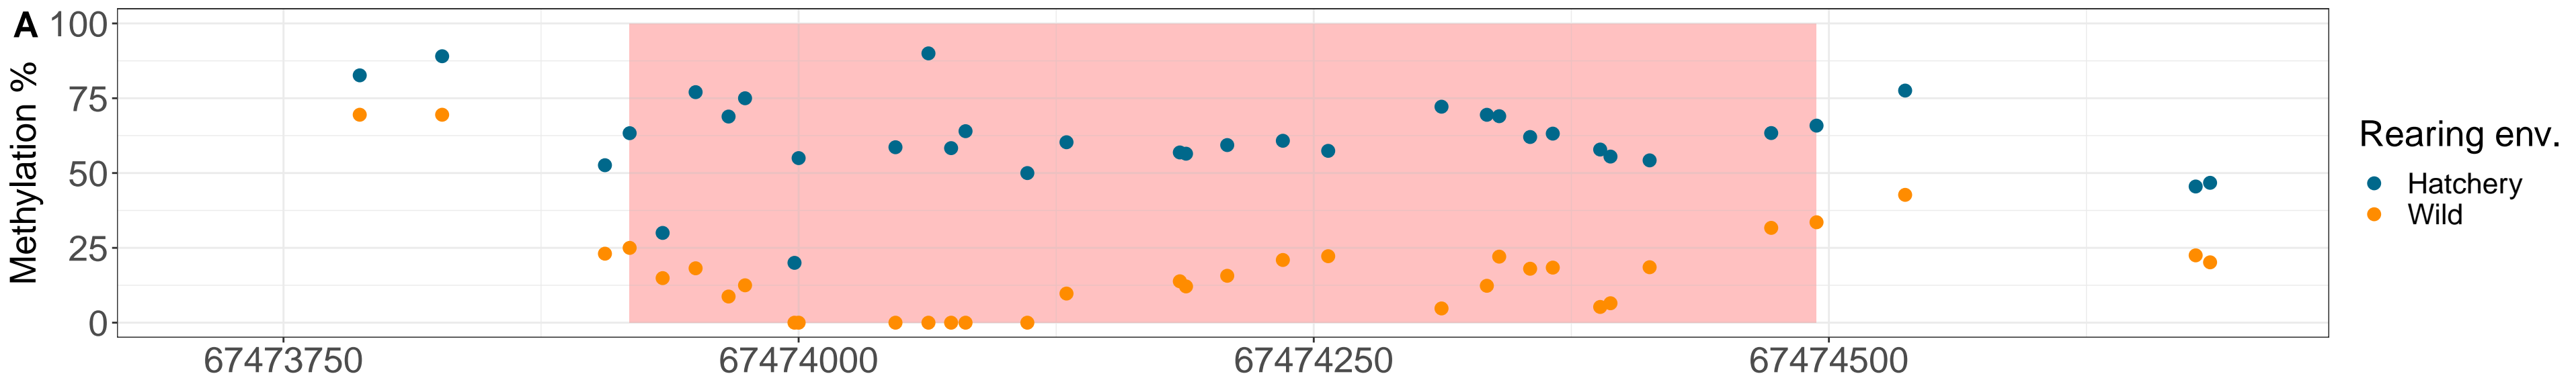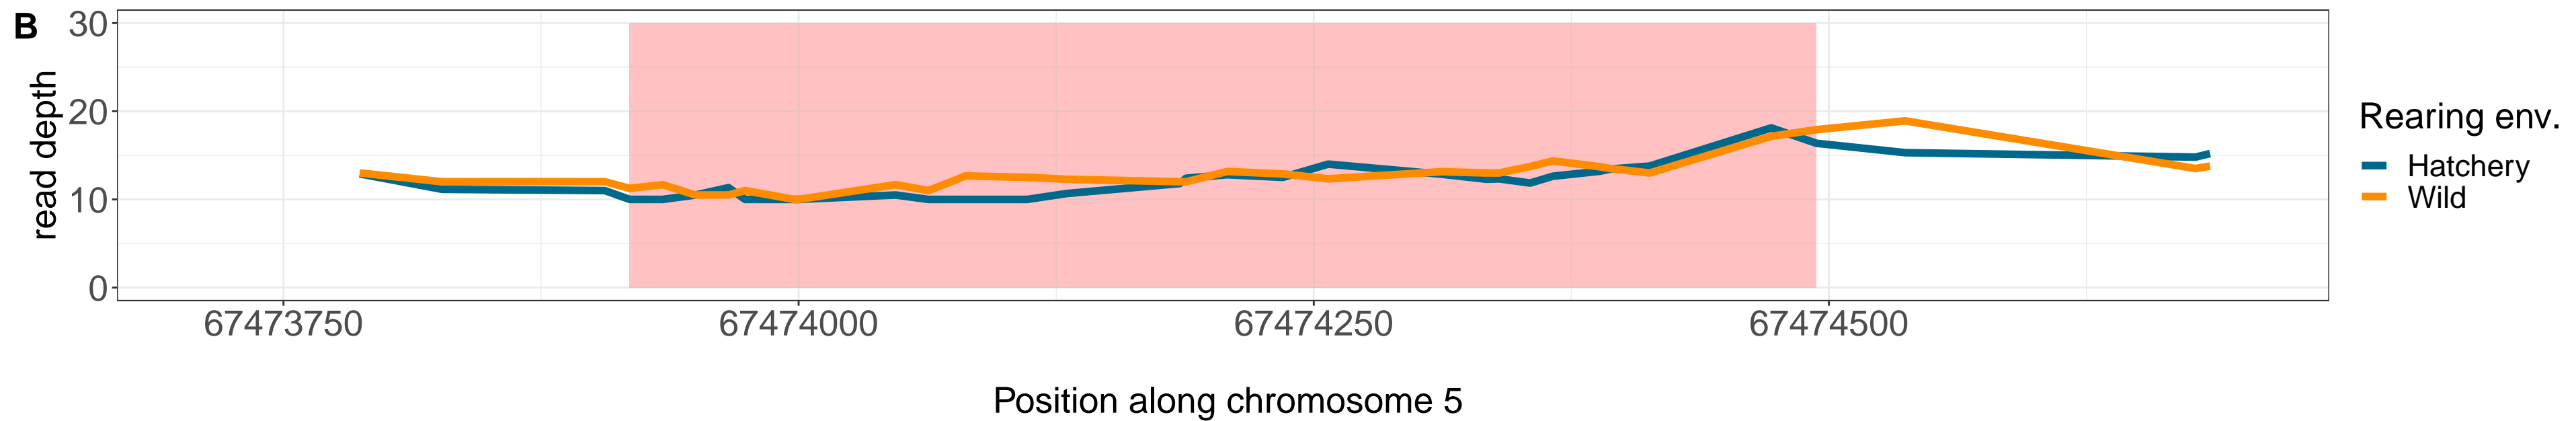

**A**

## DMR\_10

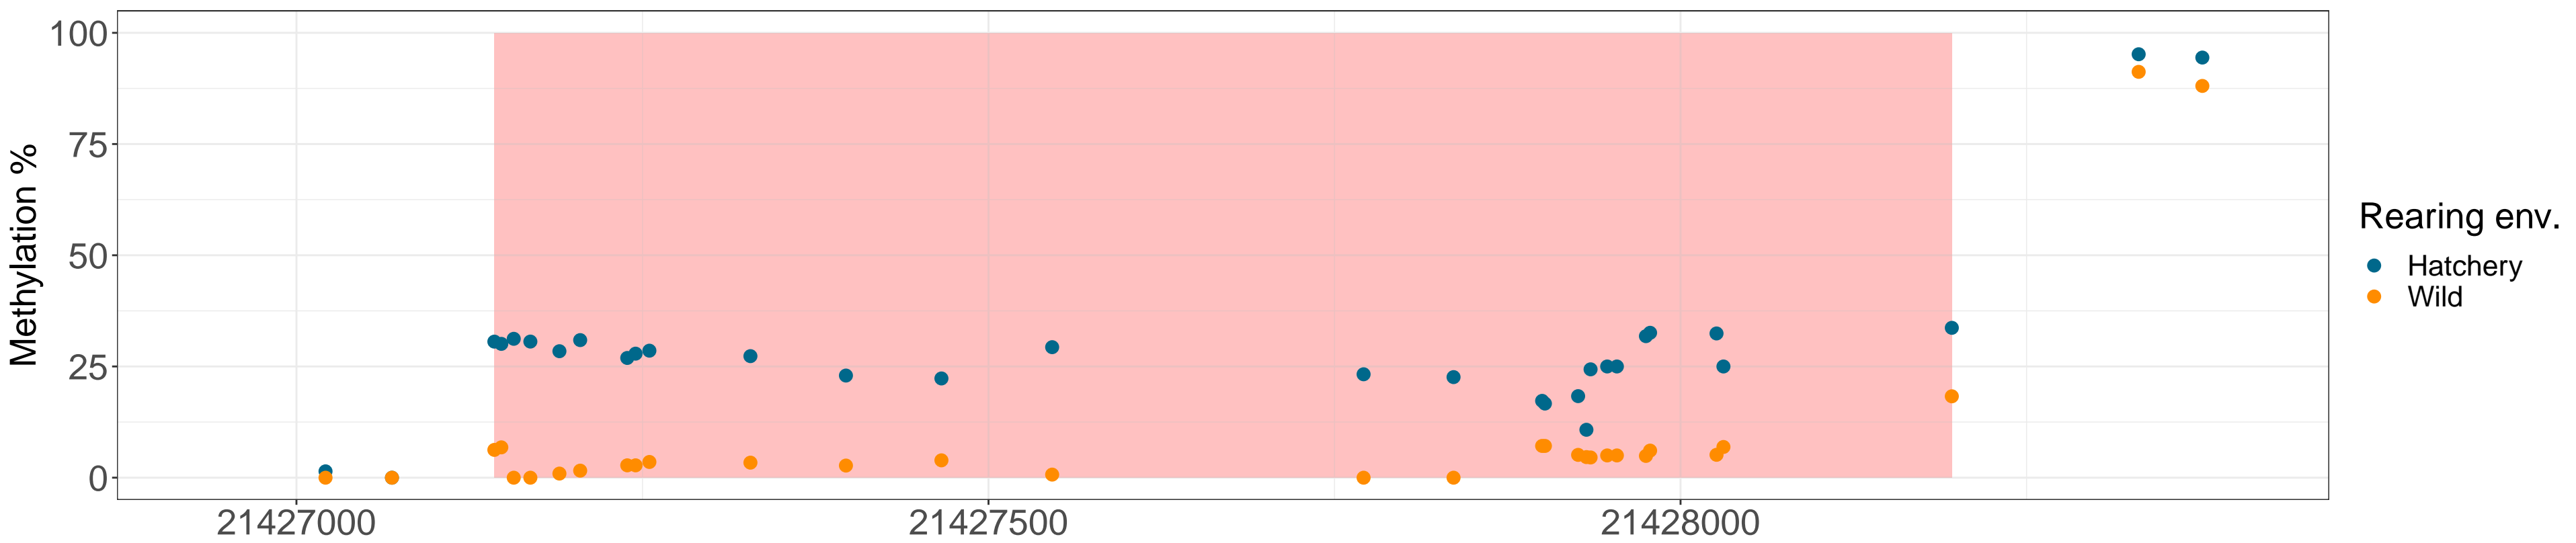**B**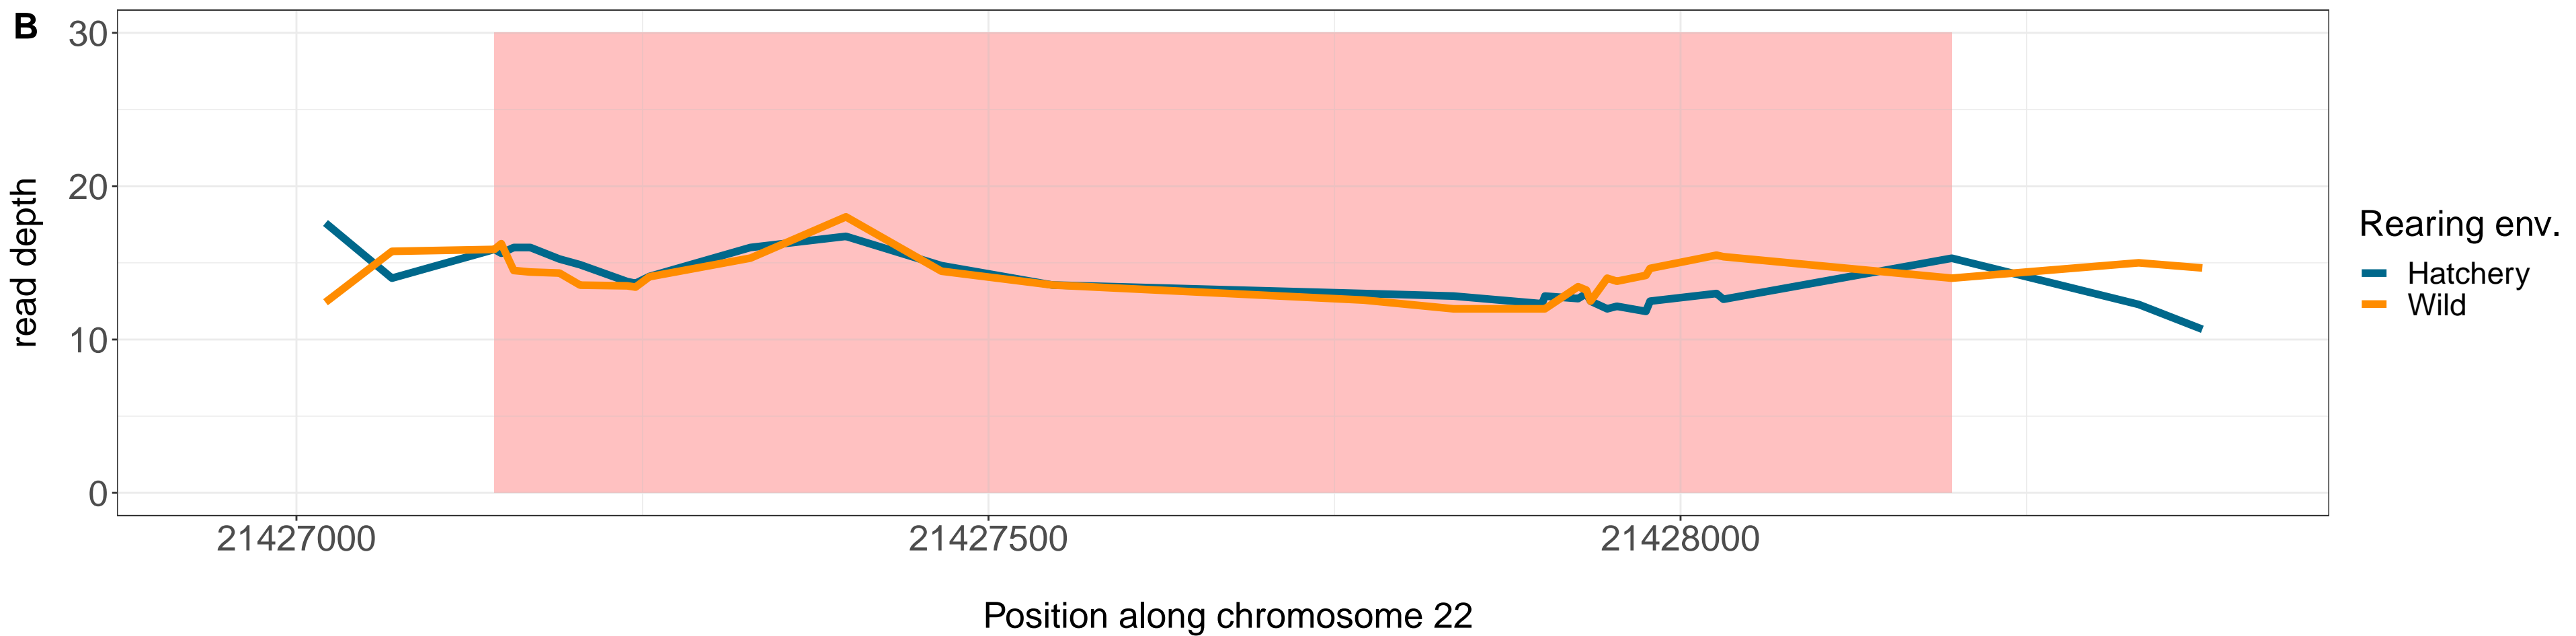

# DMR\_11

XM\_020495136.1

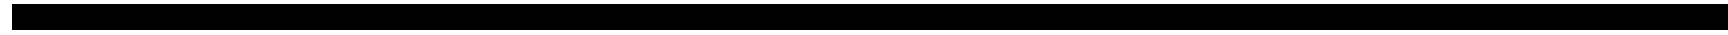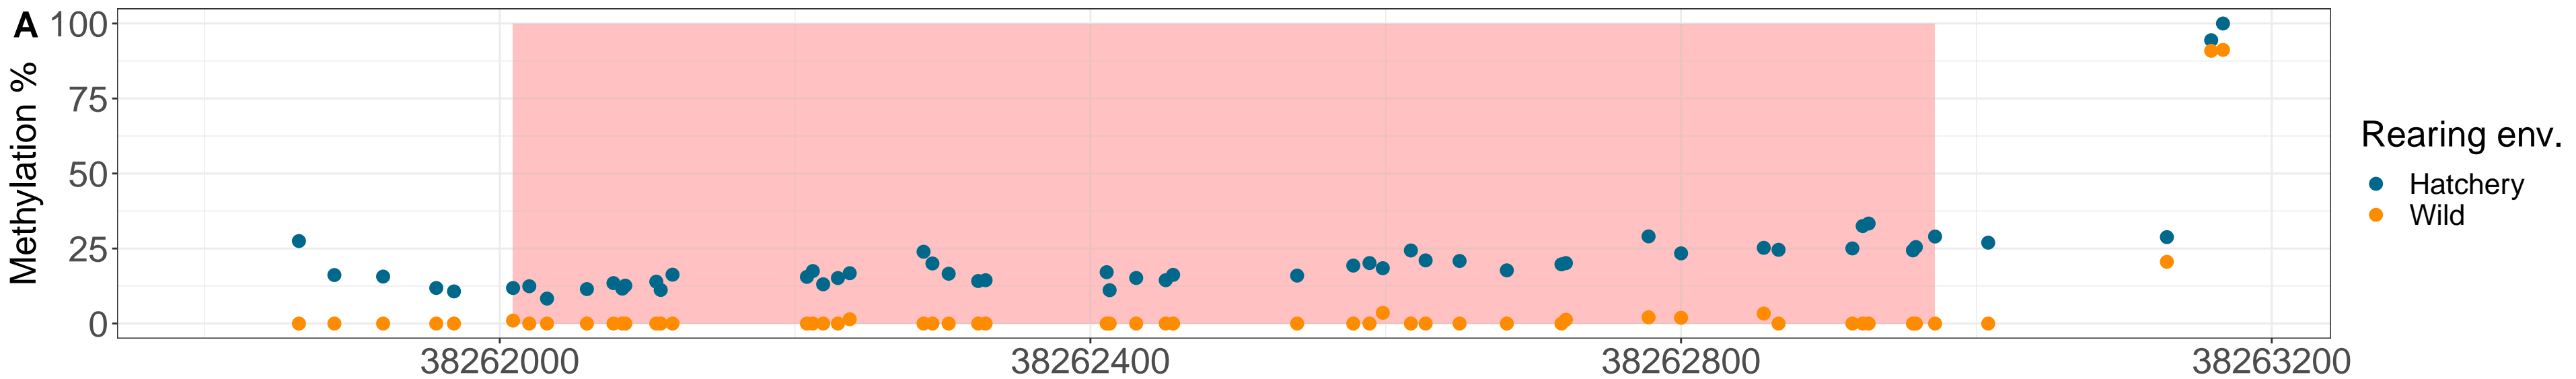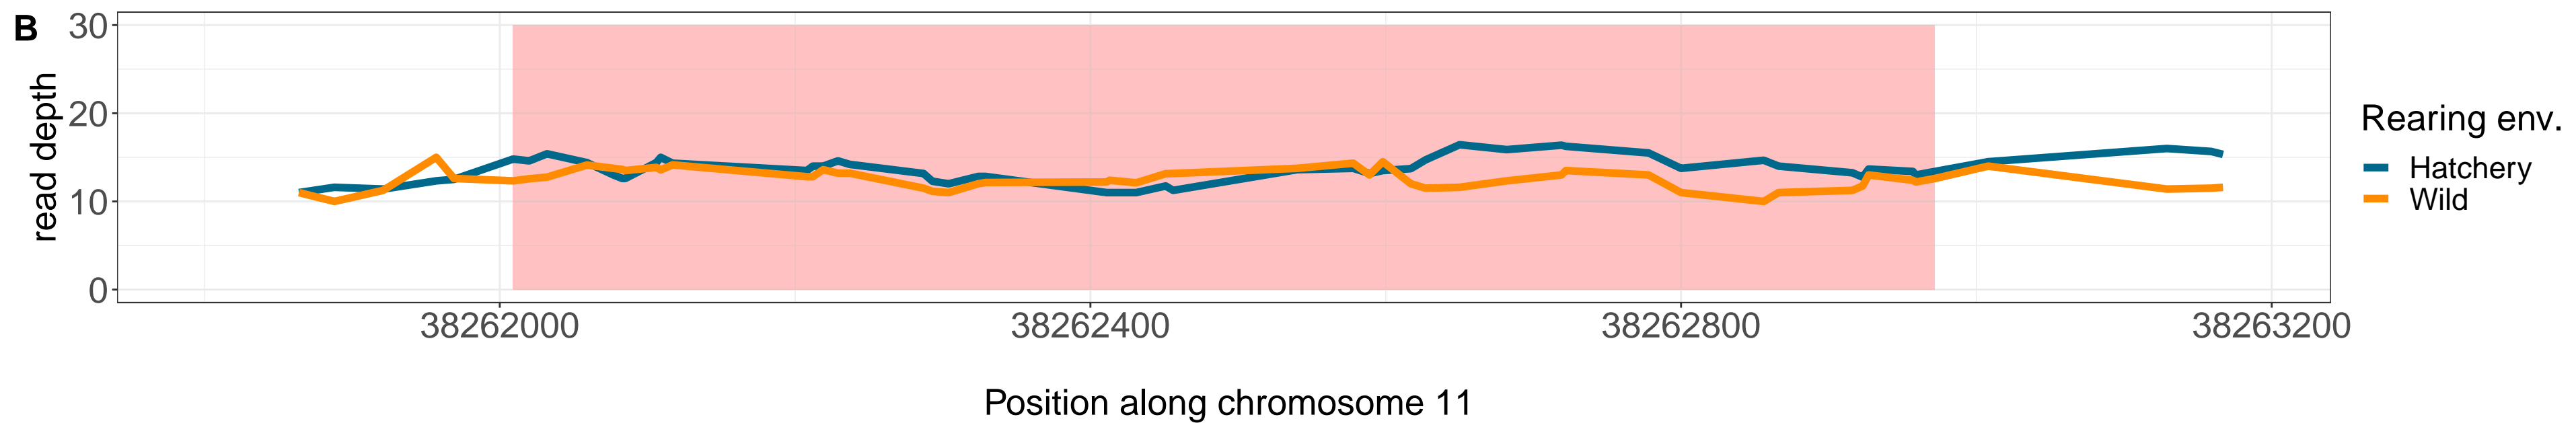

Position along chromosome 11

**A**

## DMR\_12

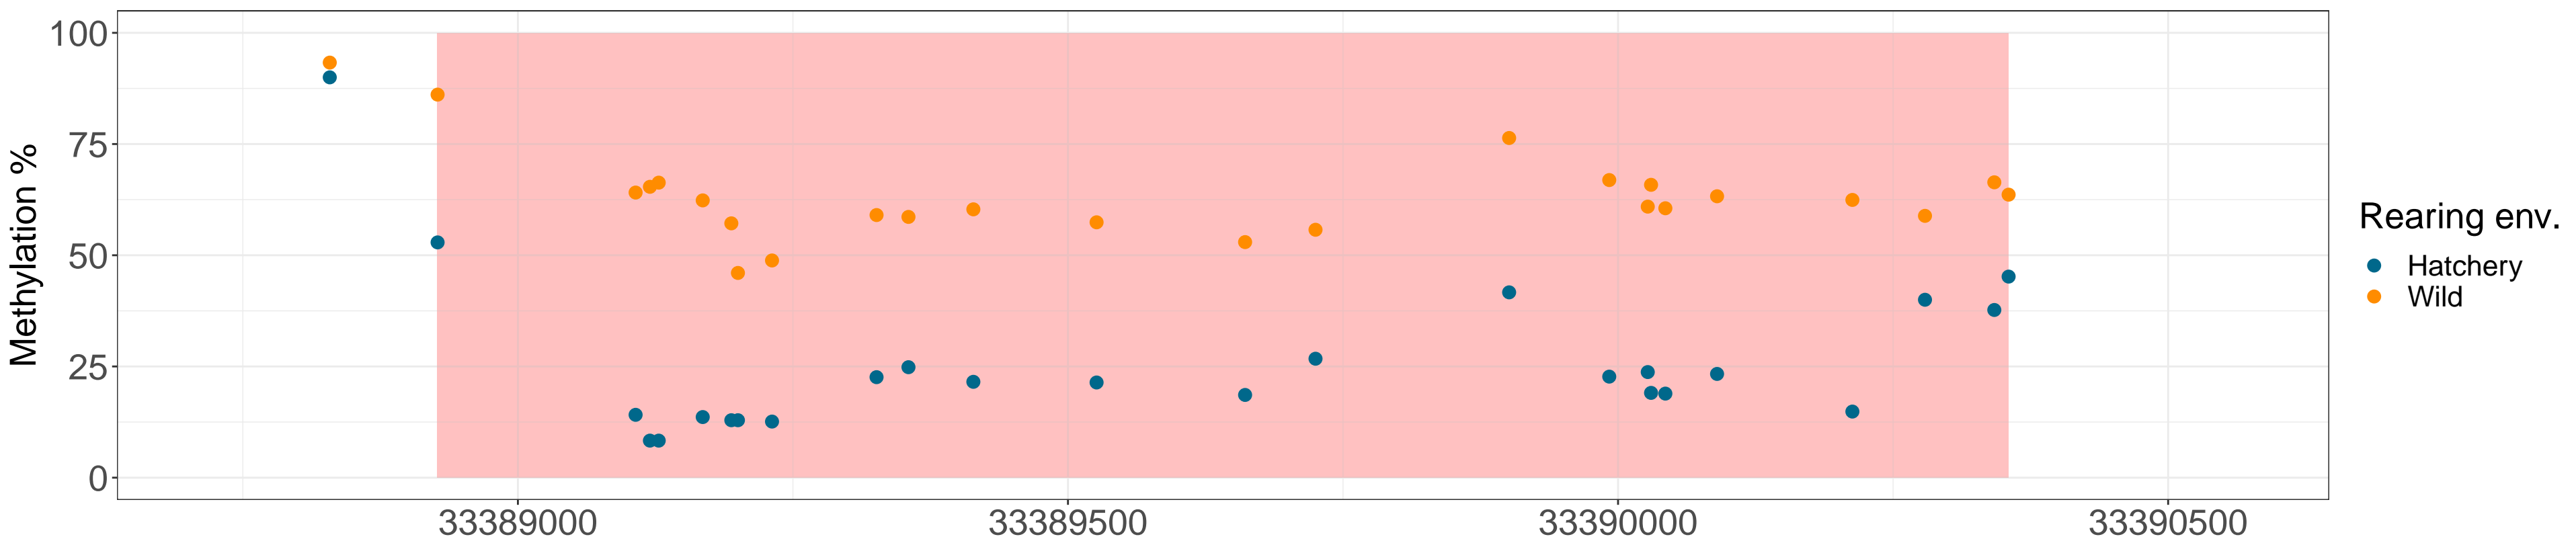**B**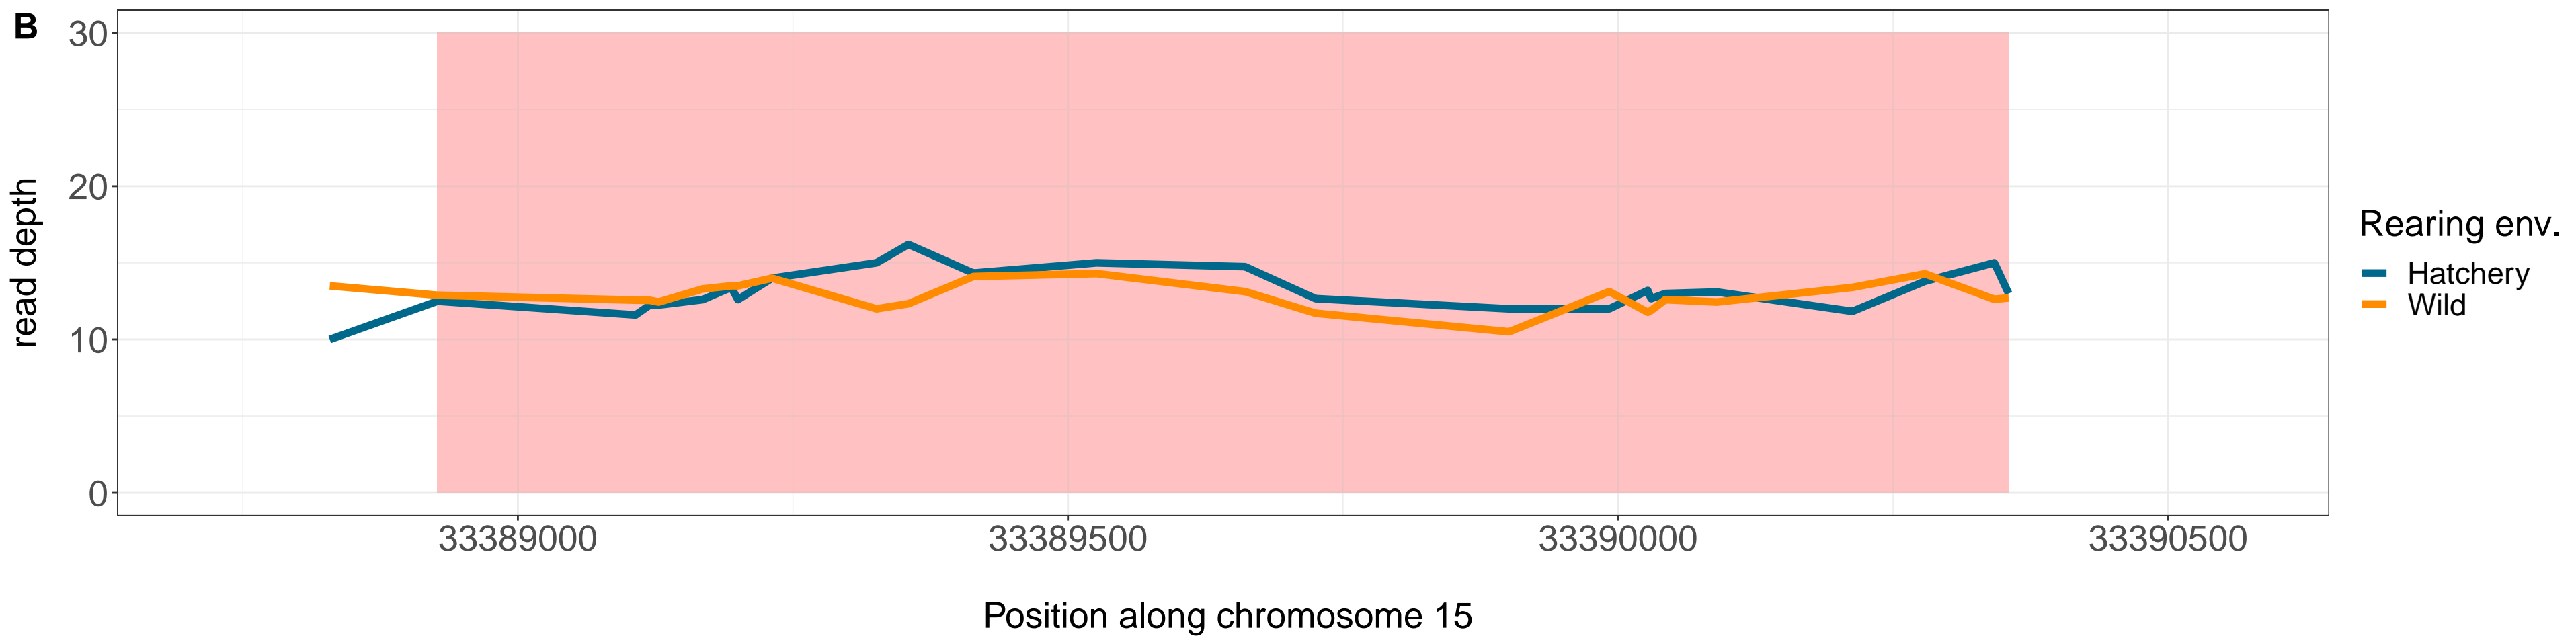

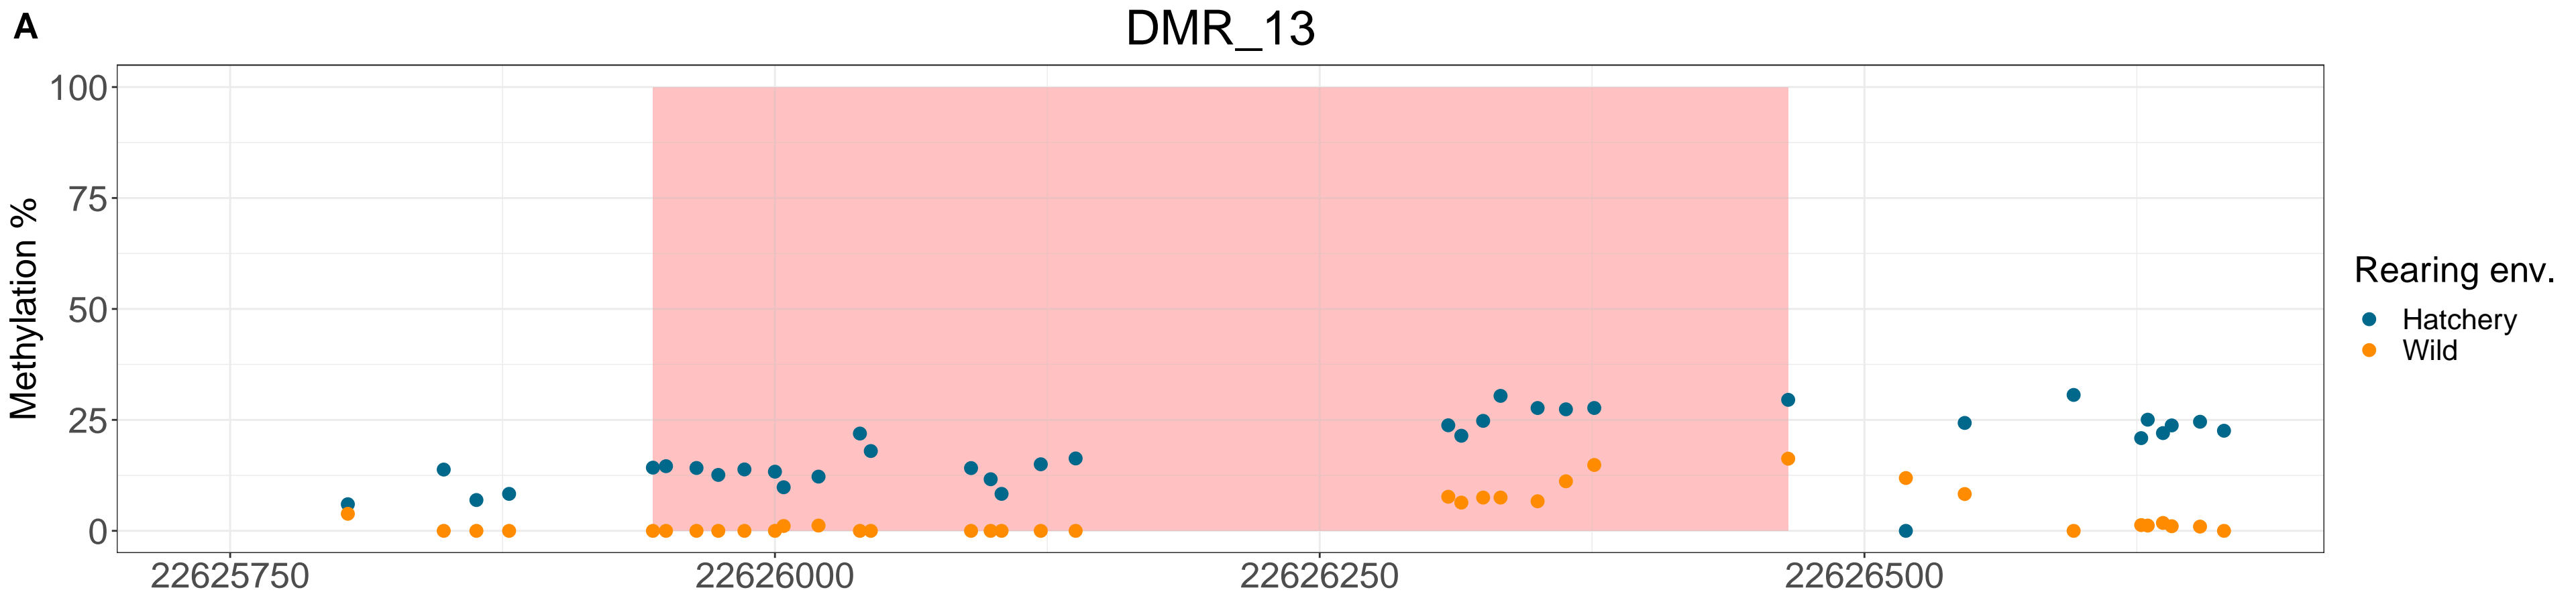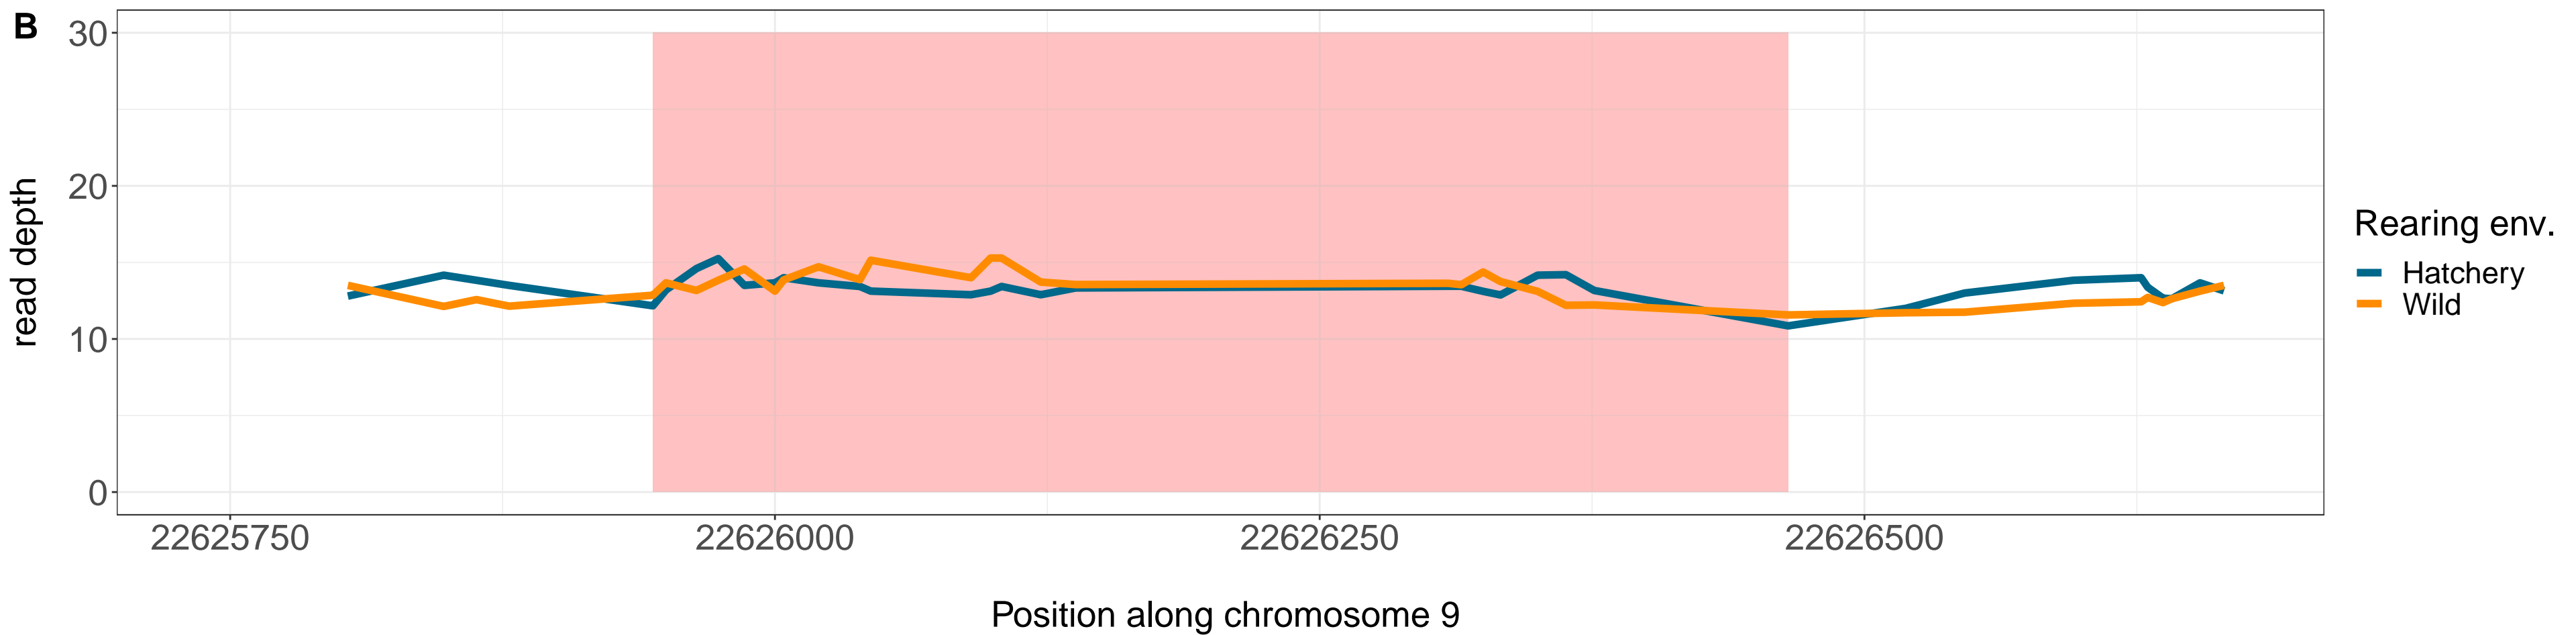

**A**

## DMR\_14

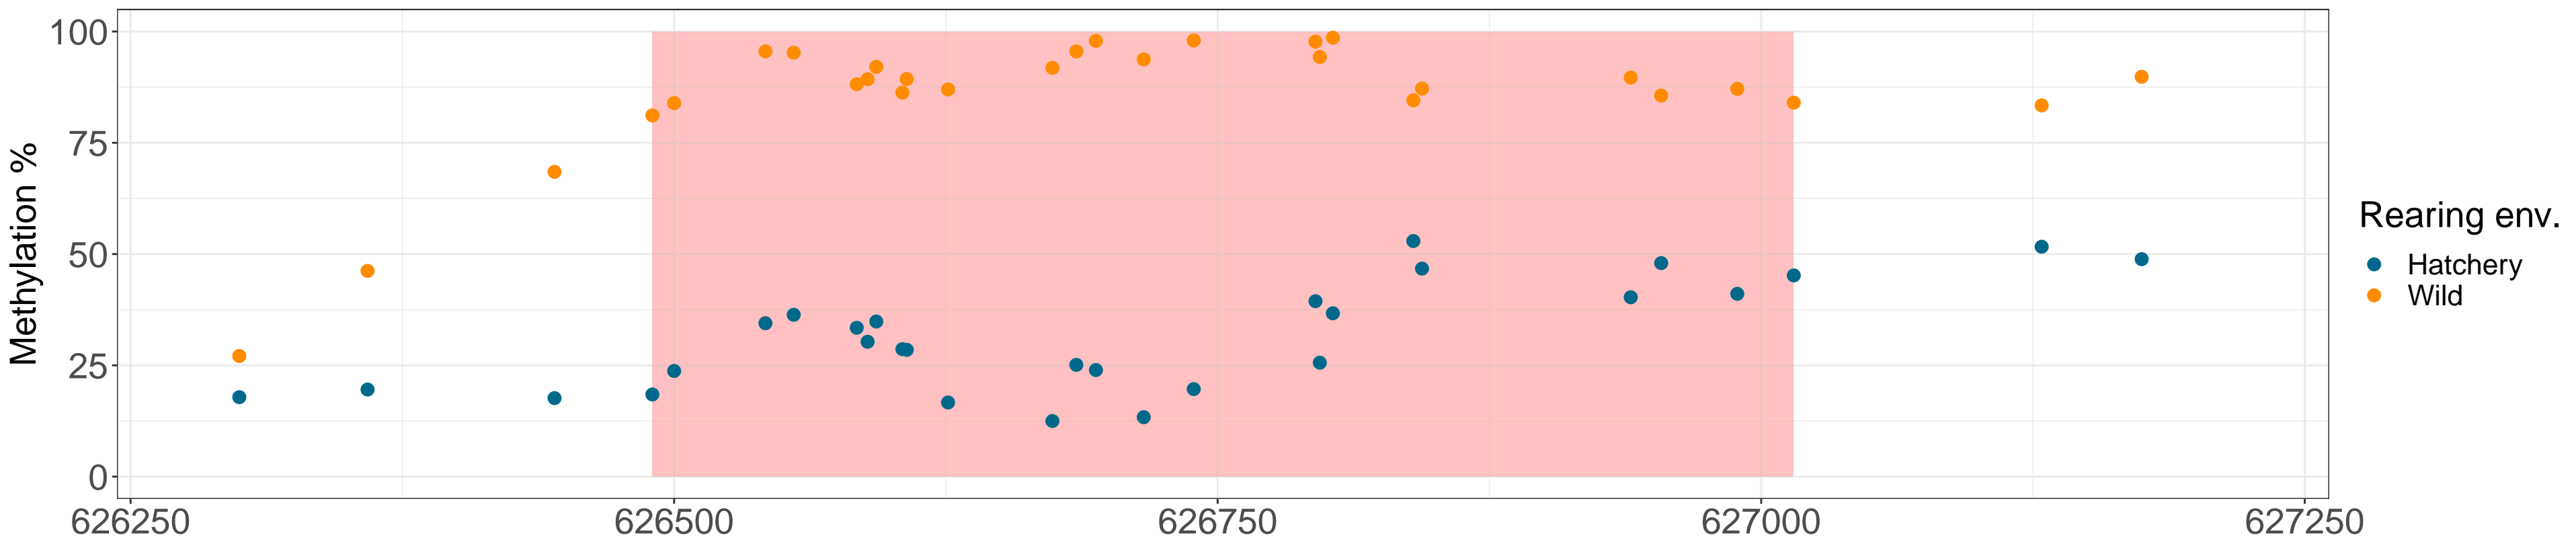**B**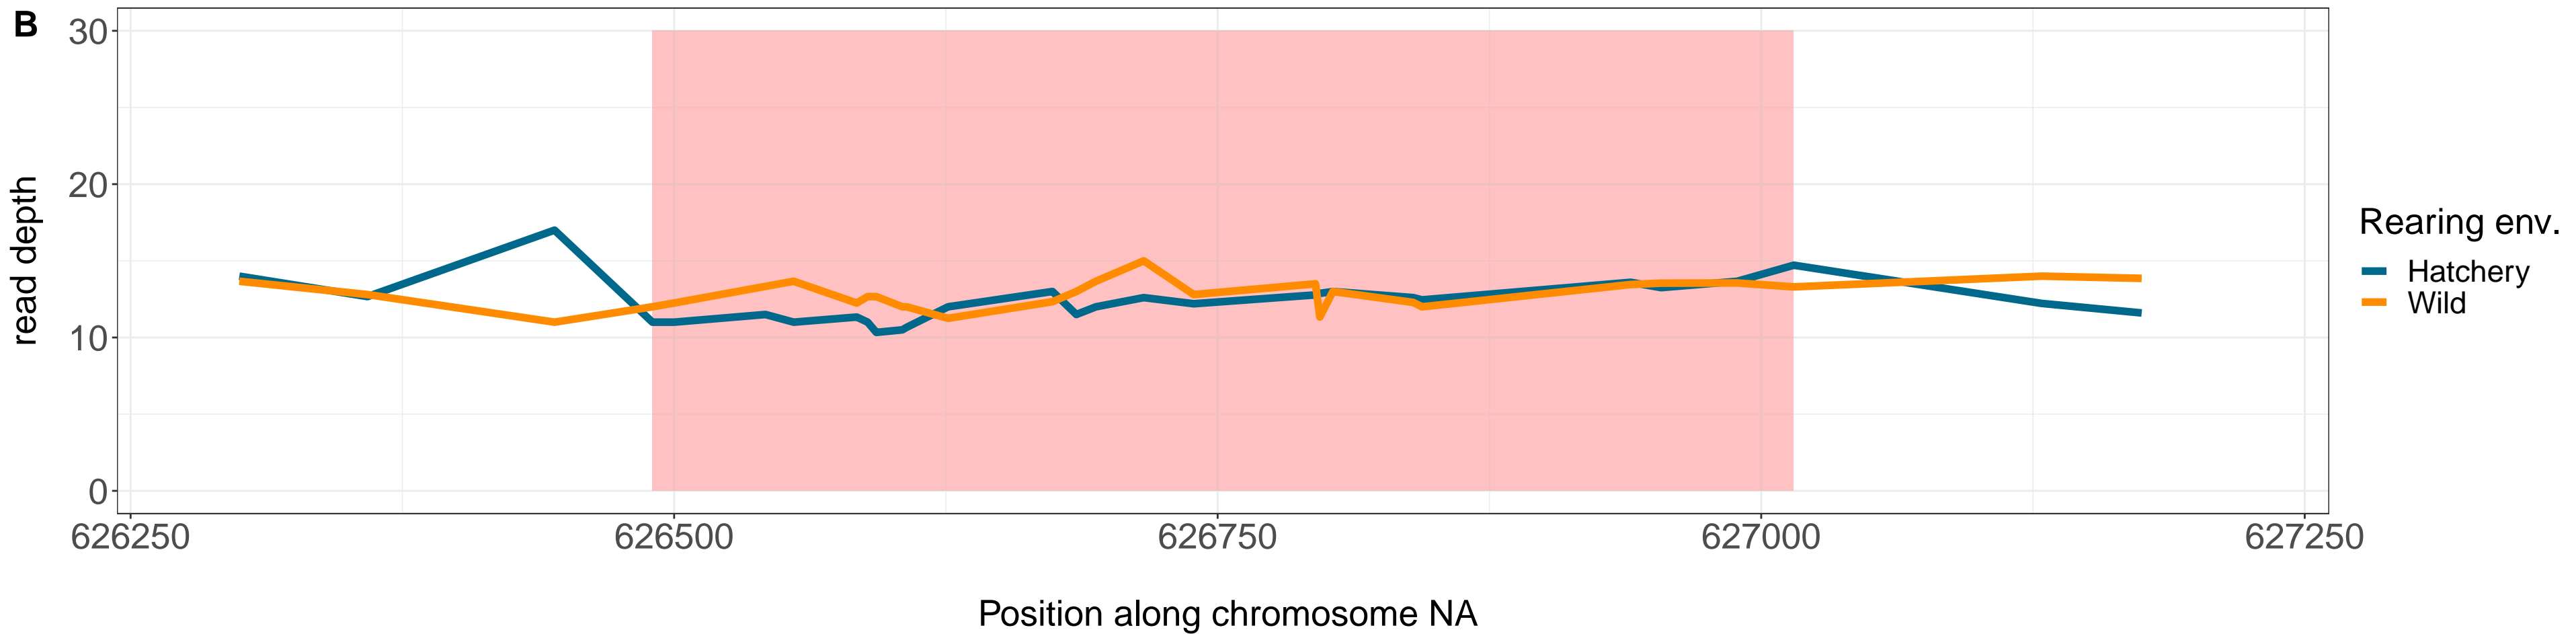

# DMR\_15

XM\_020502492.1

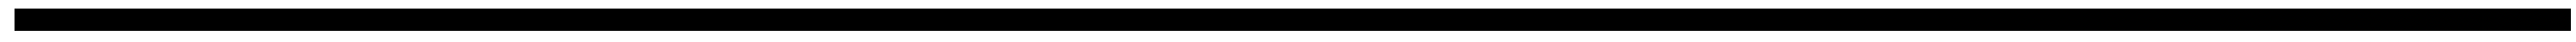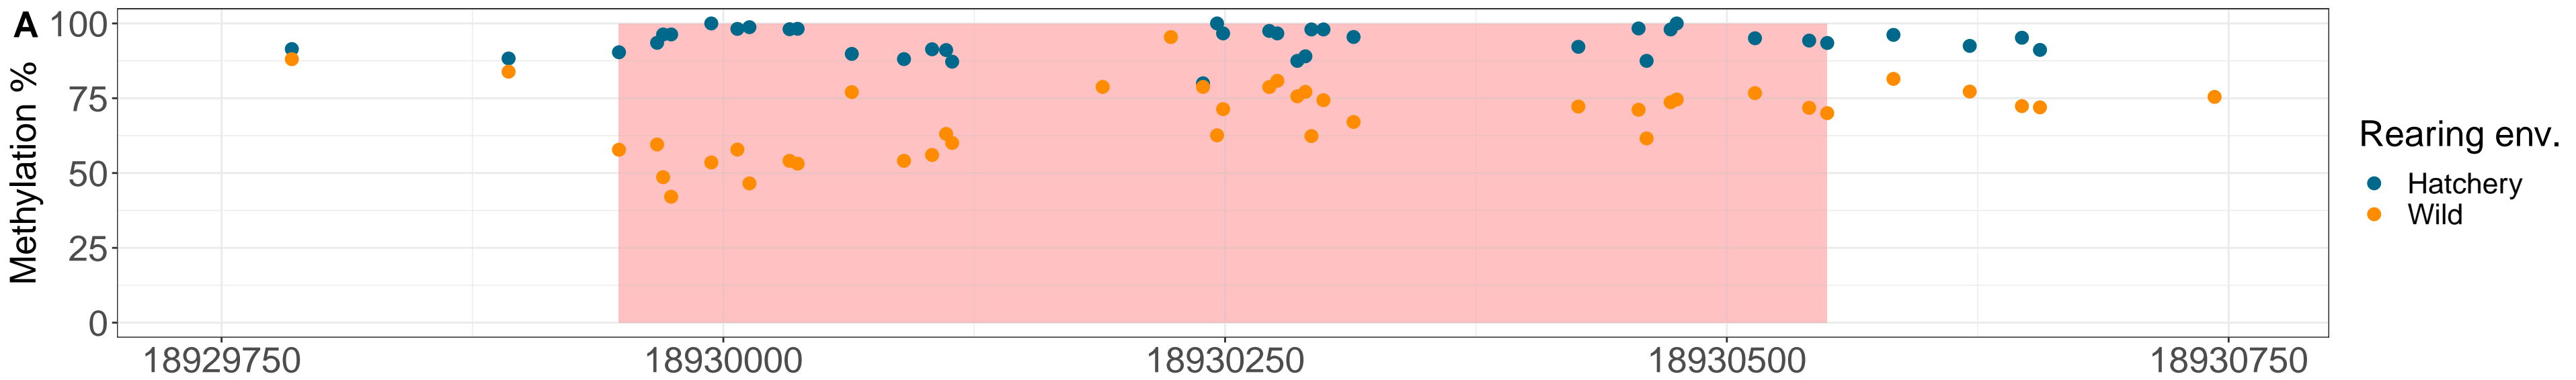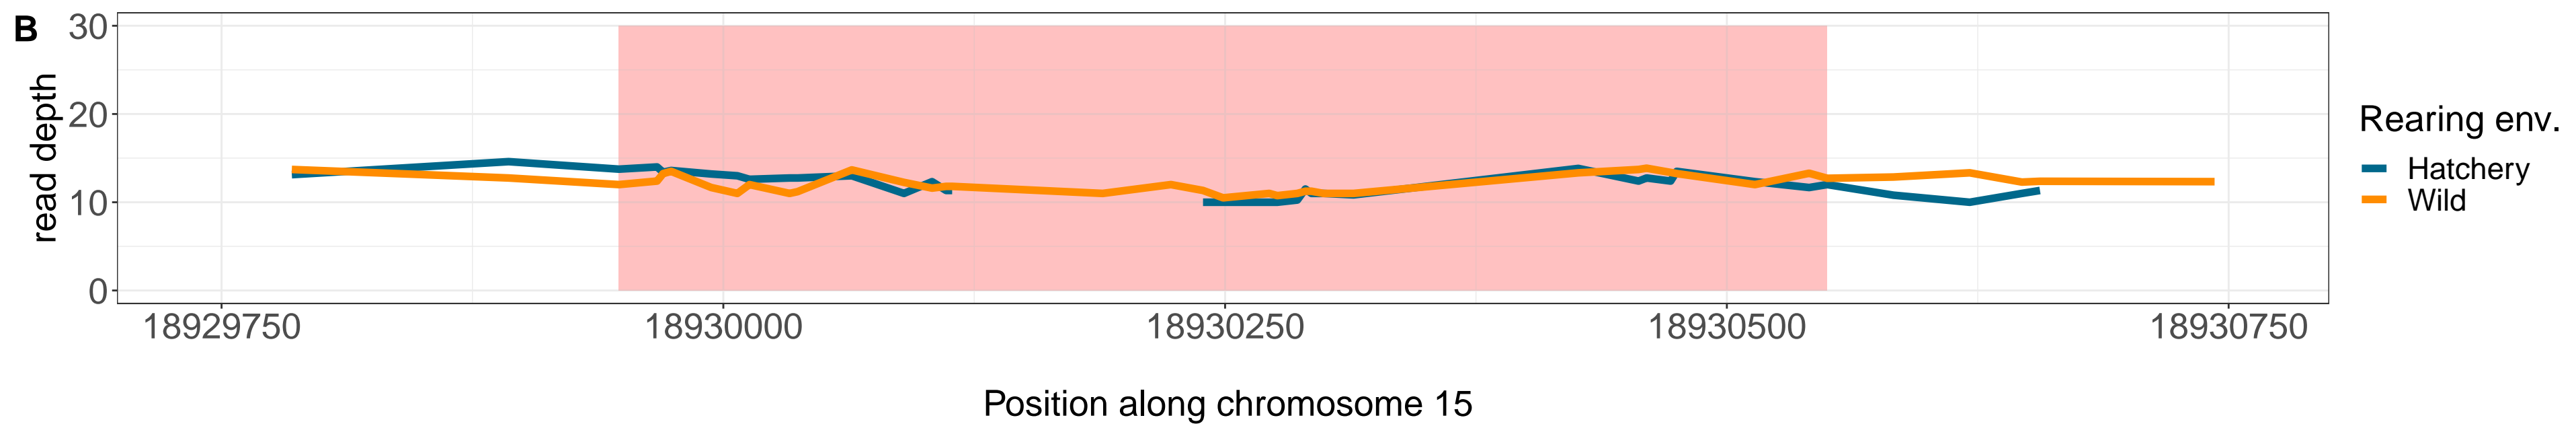

# DMR\_16

XM\_020503200.1

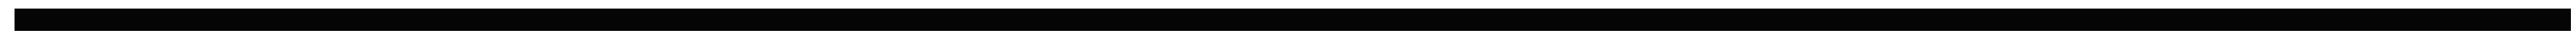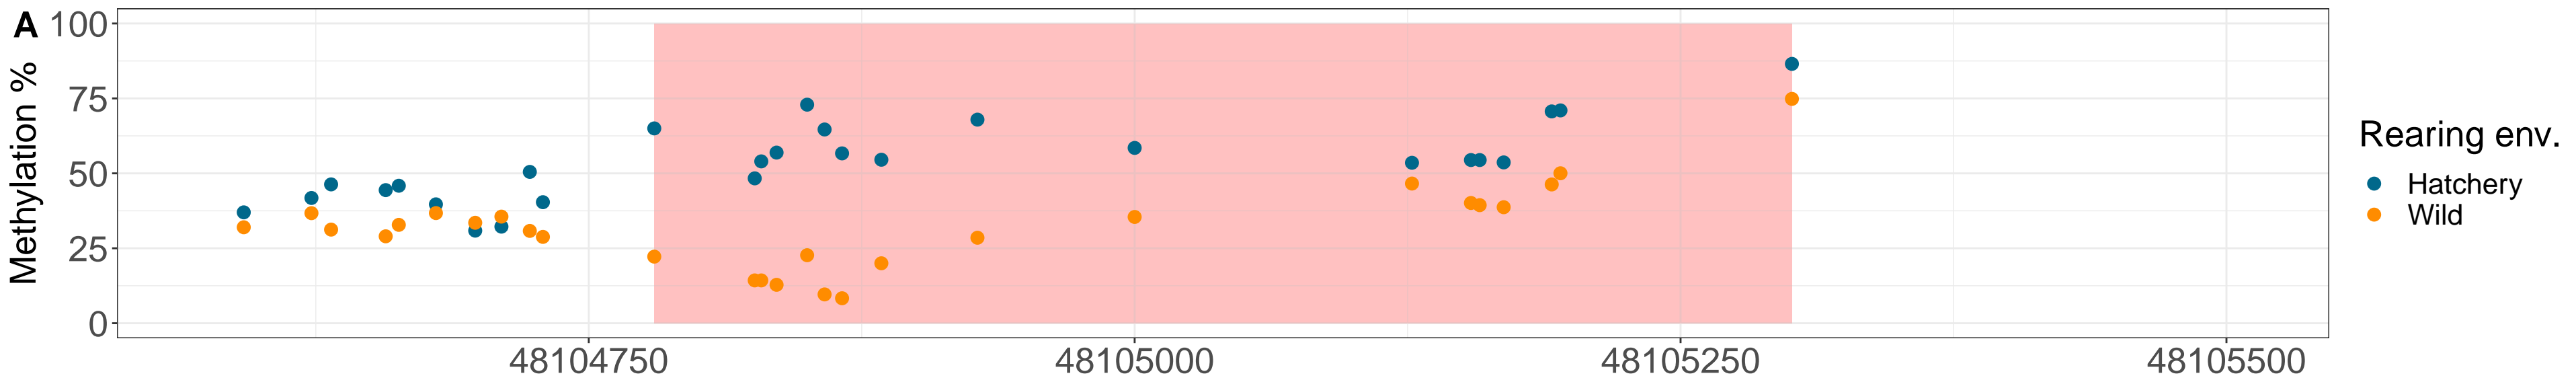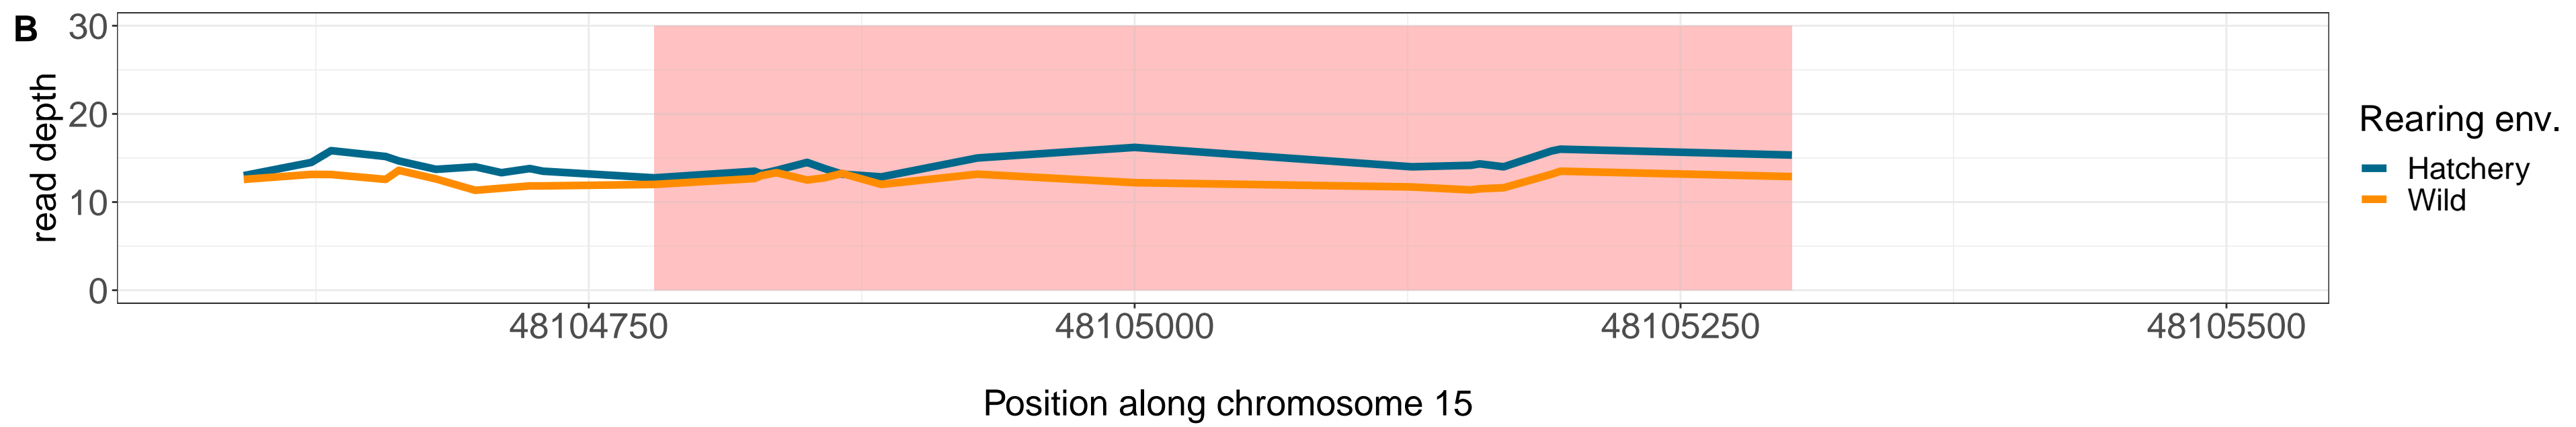



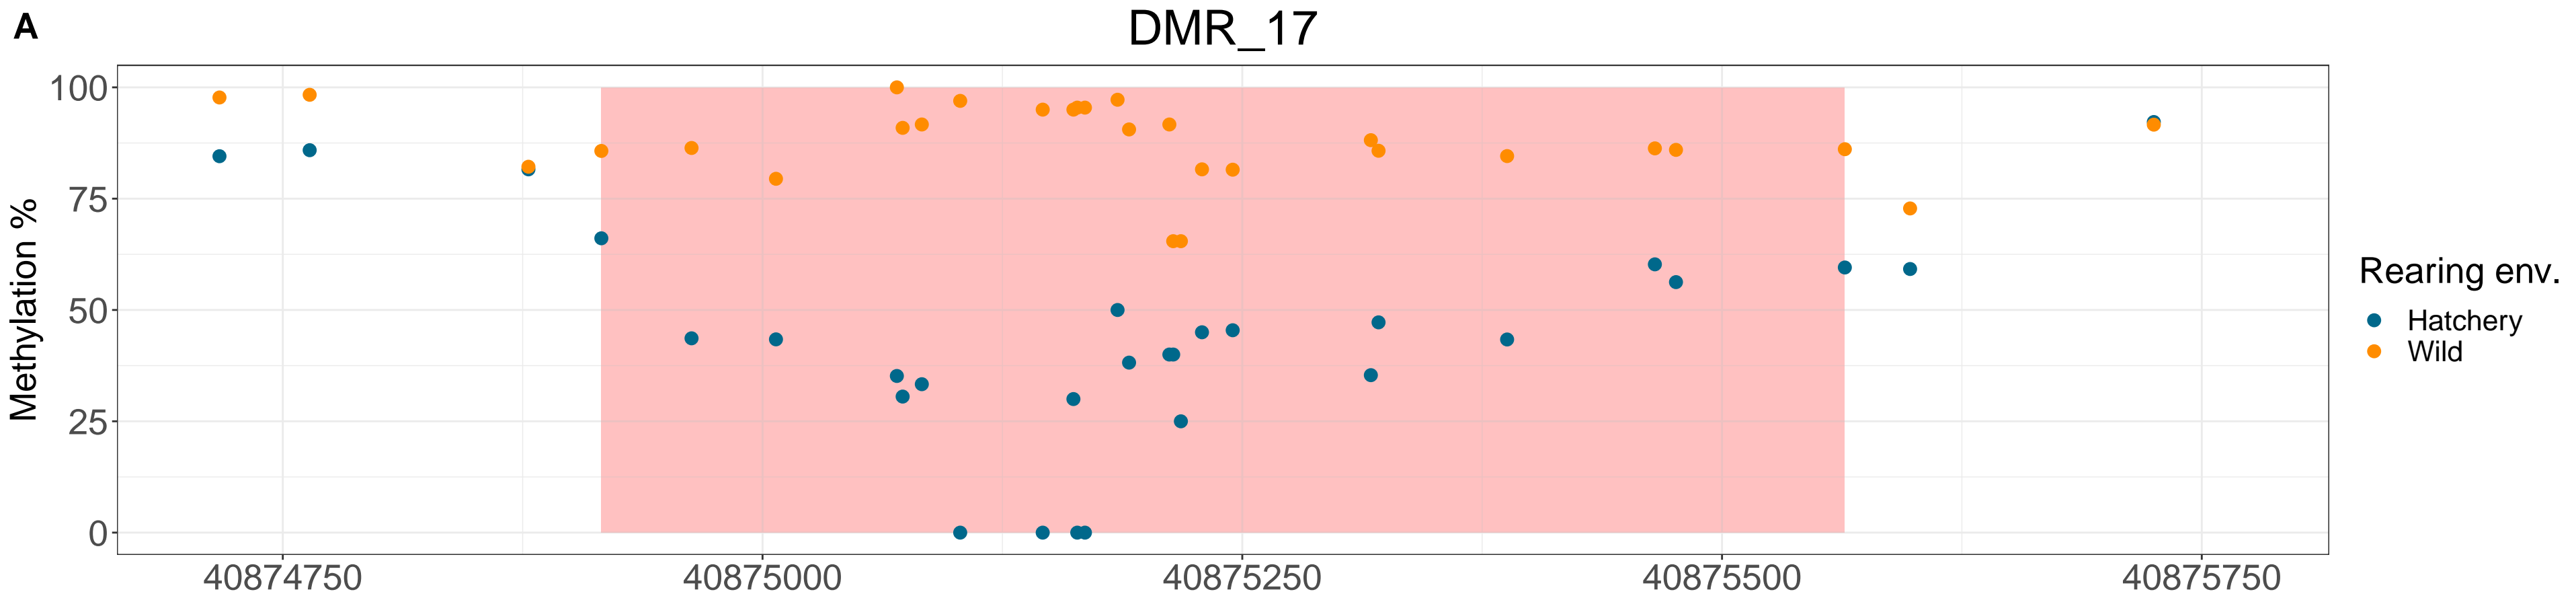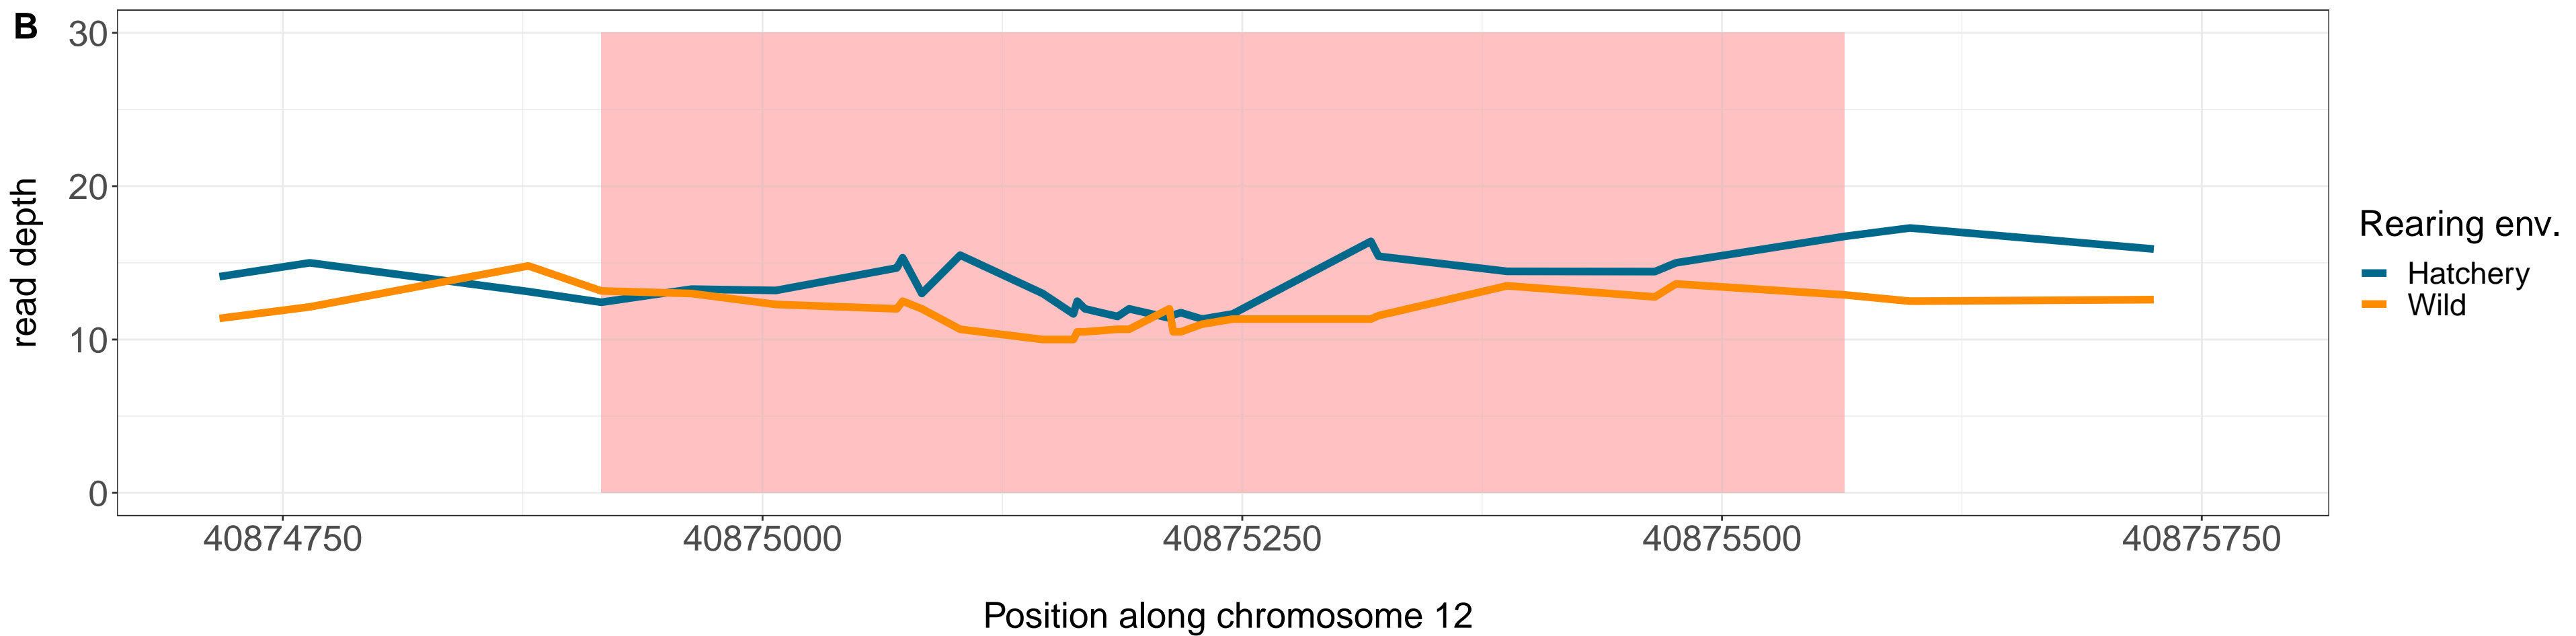

# DMR\_18

XM\_020507116.1

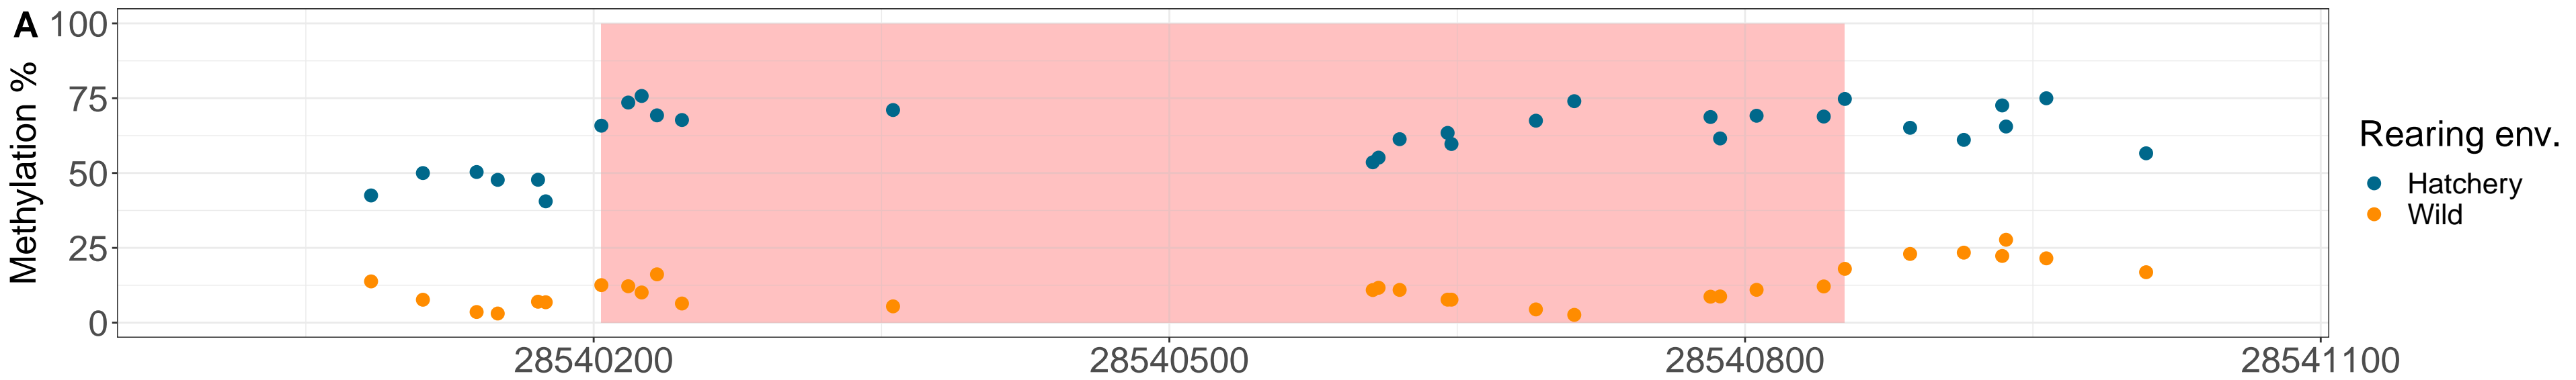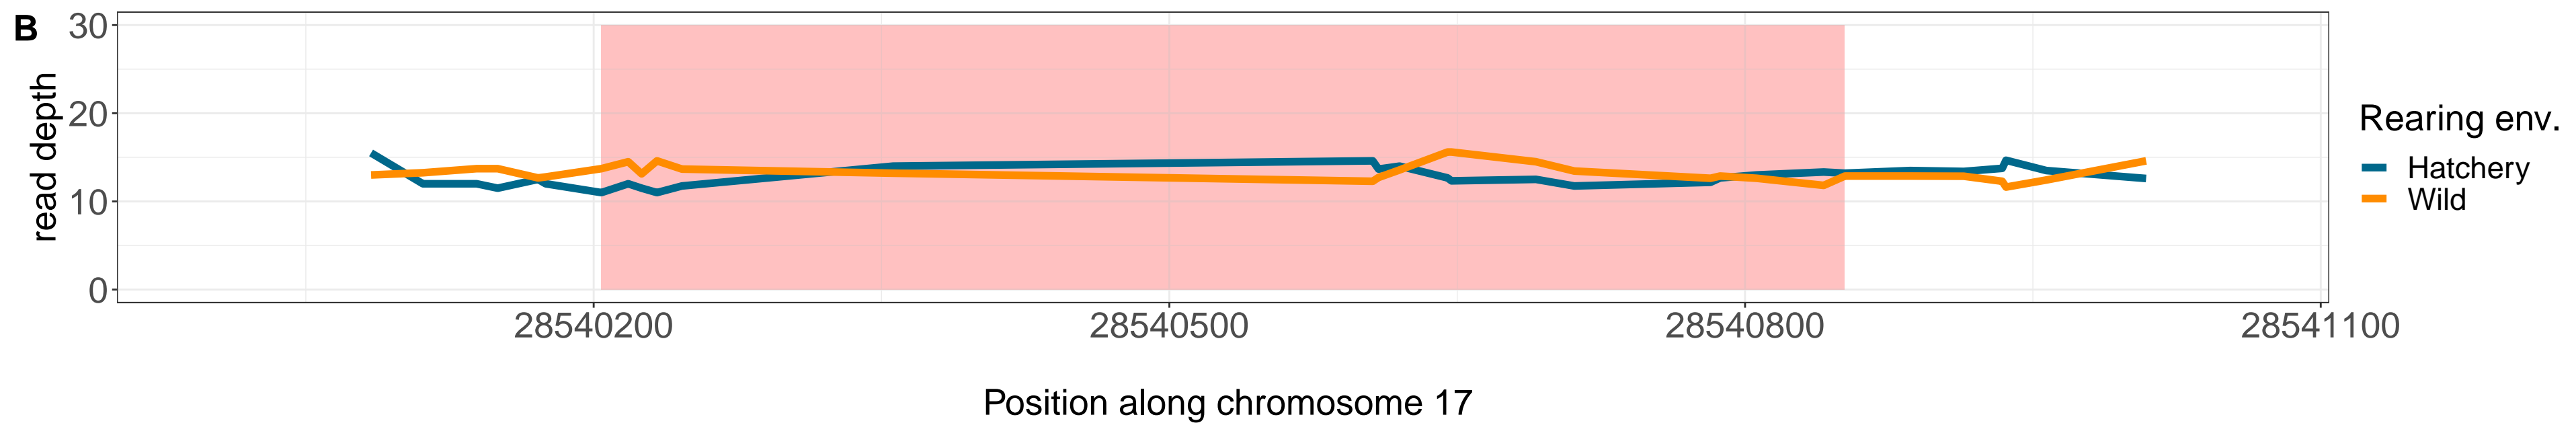

**A**

## DMR\_19

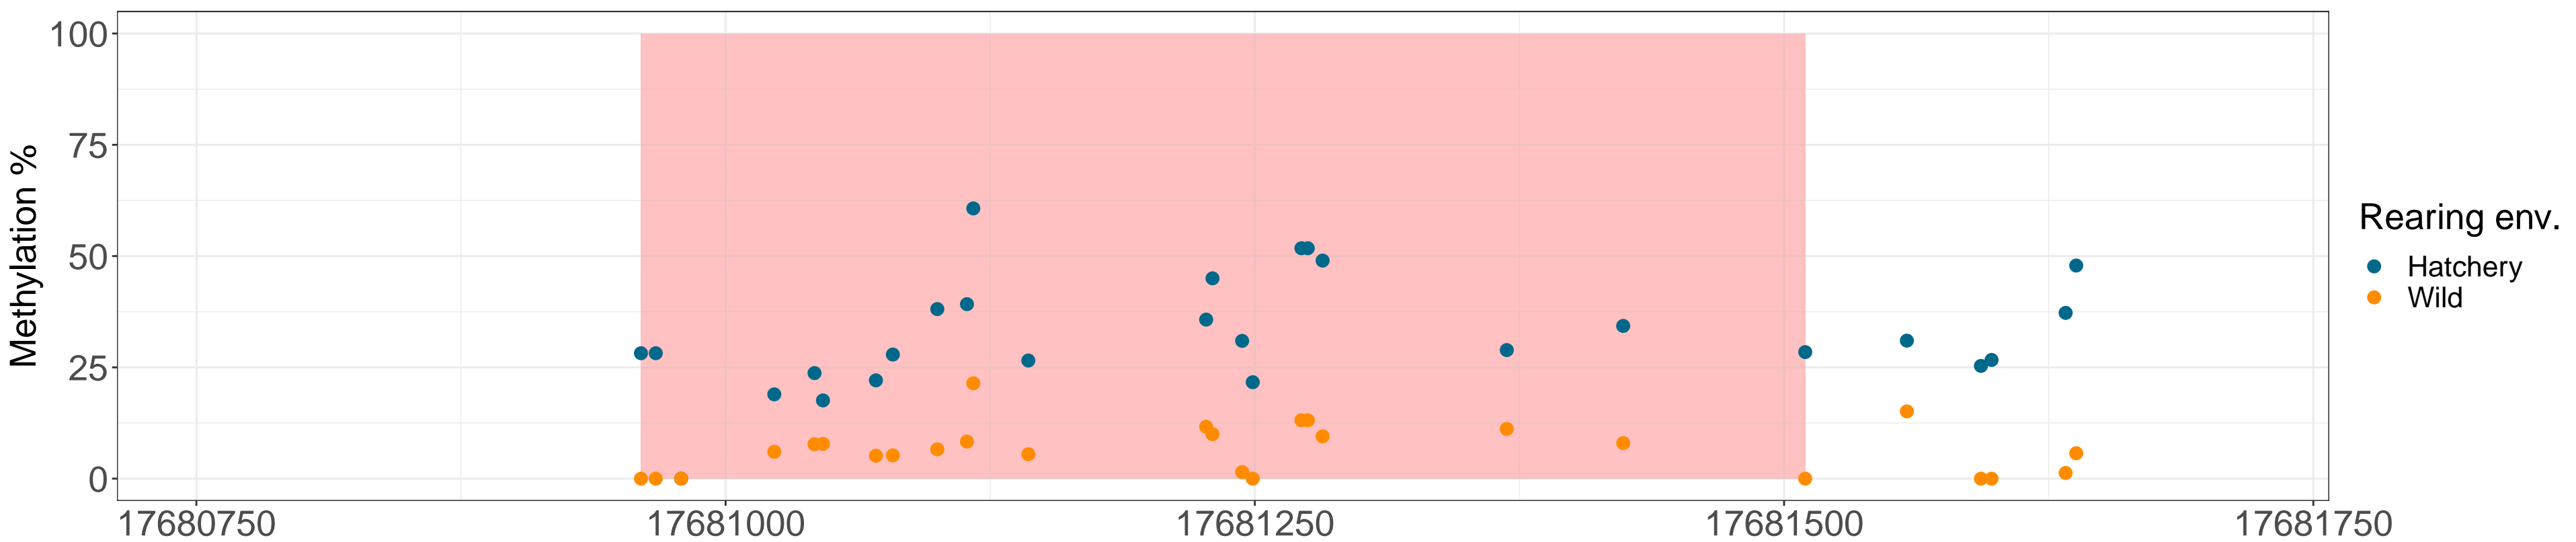**B**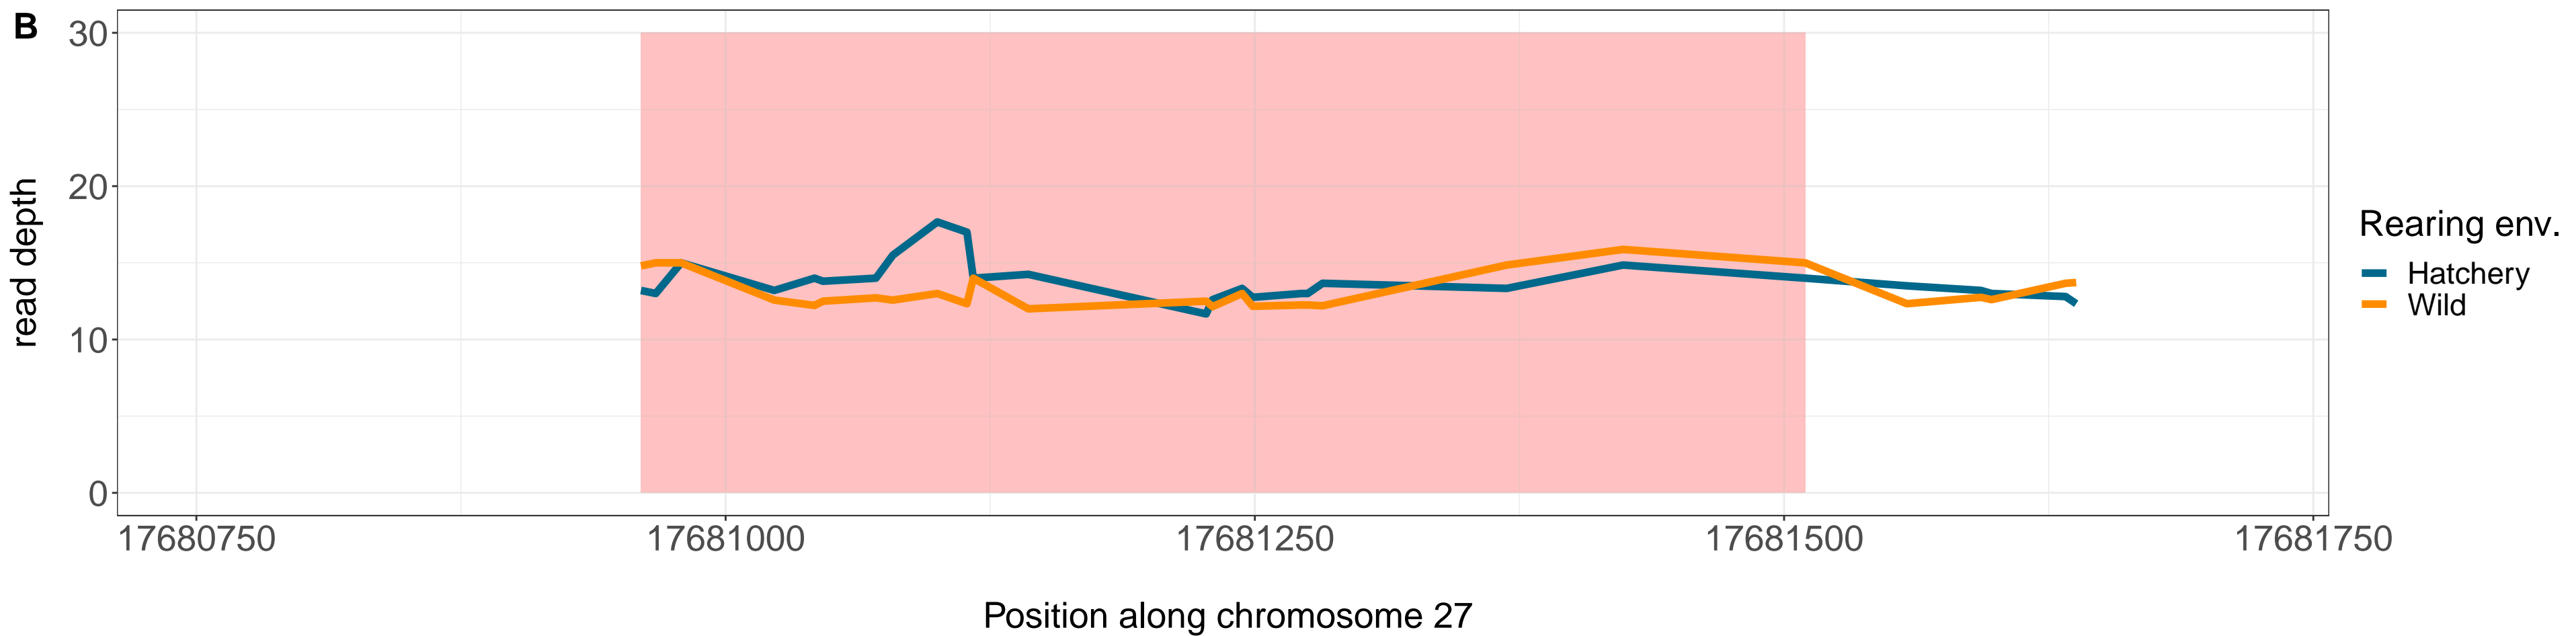

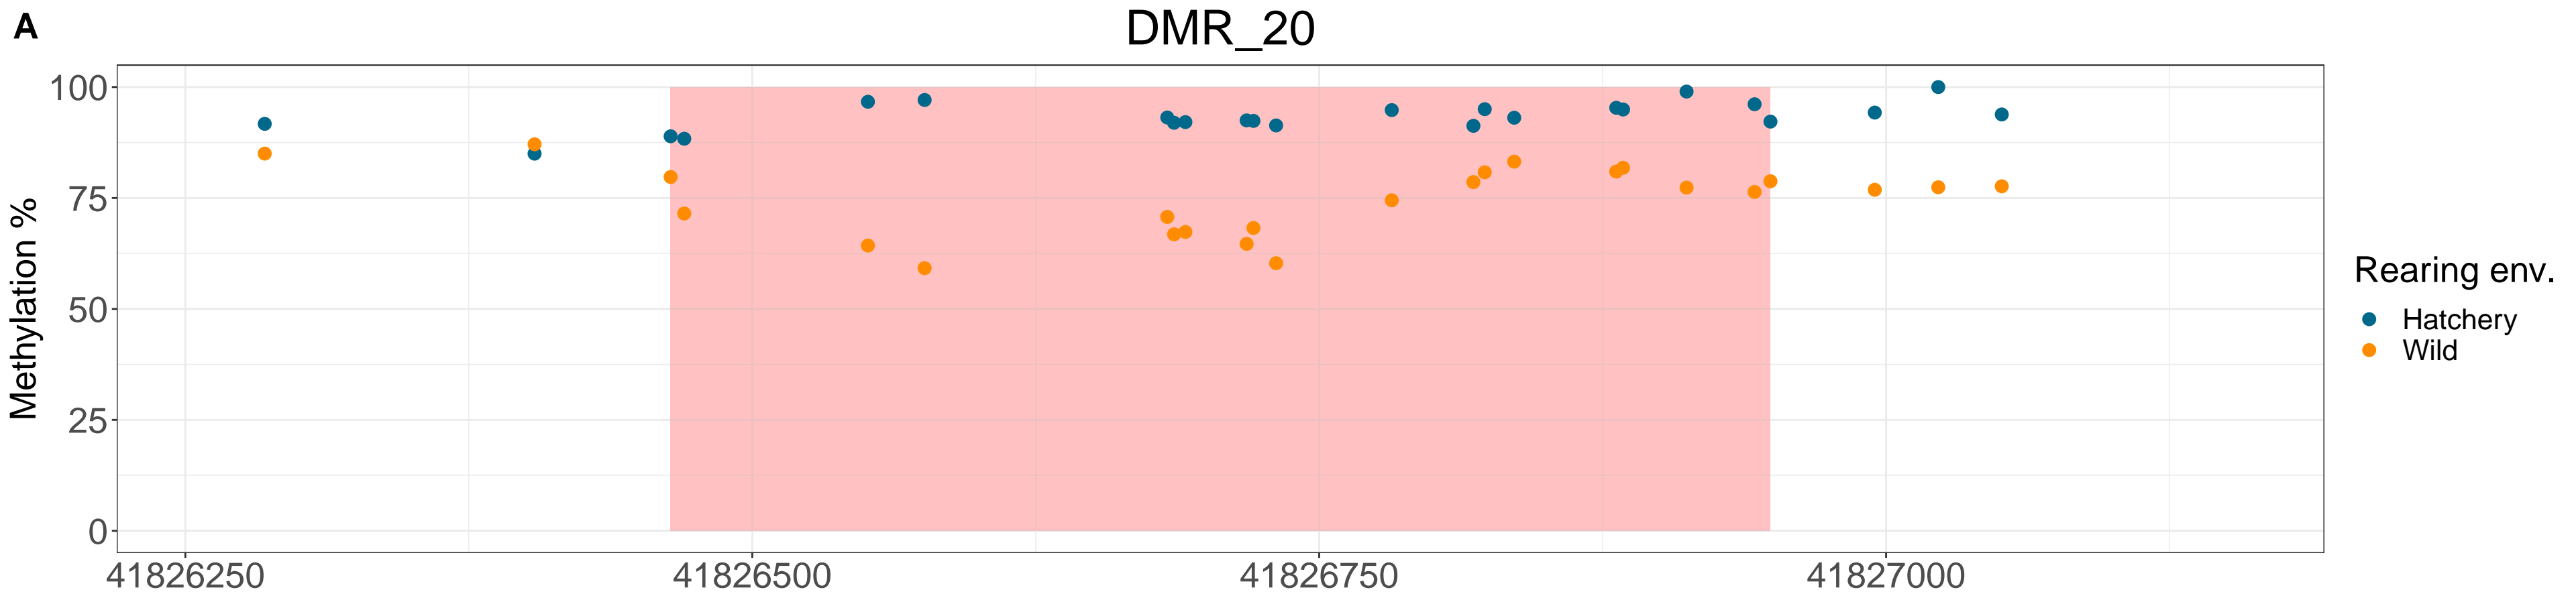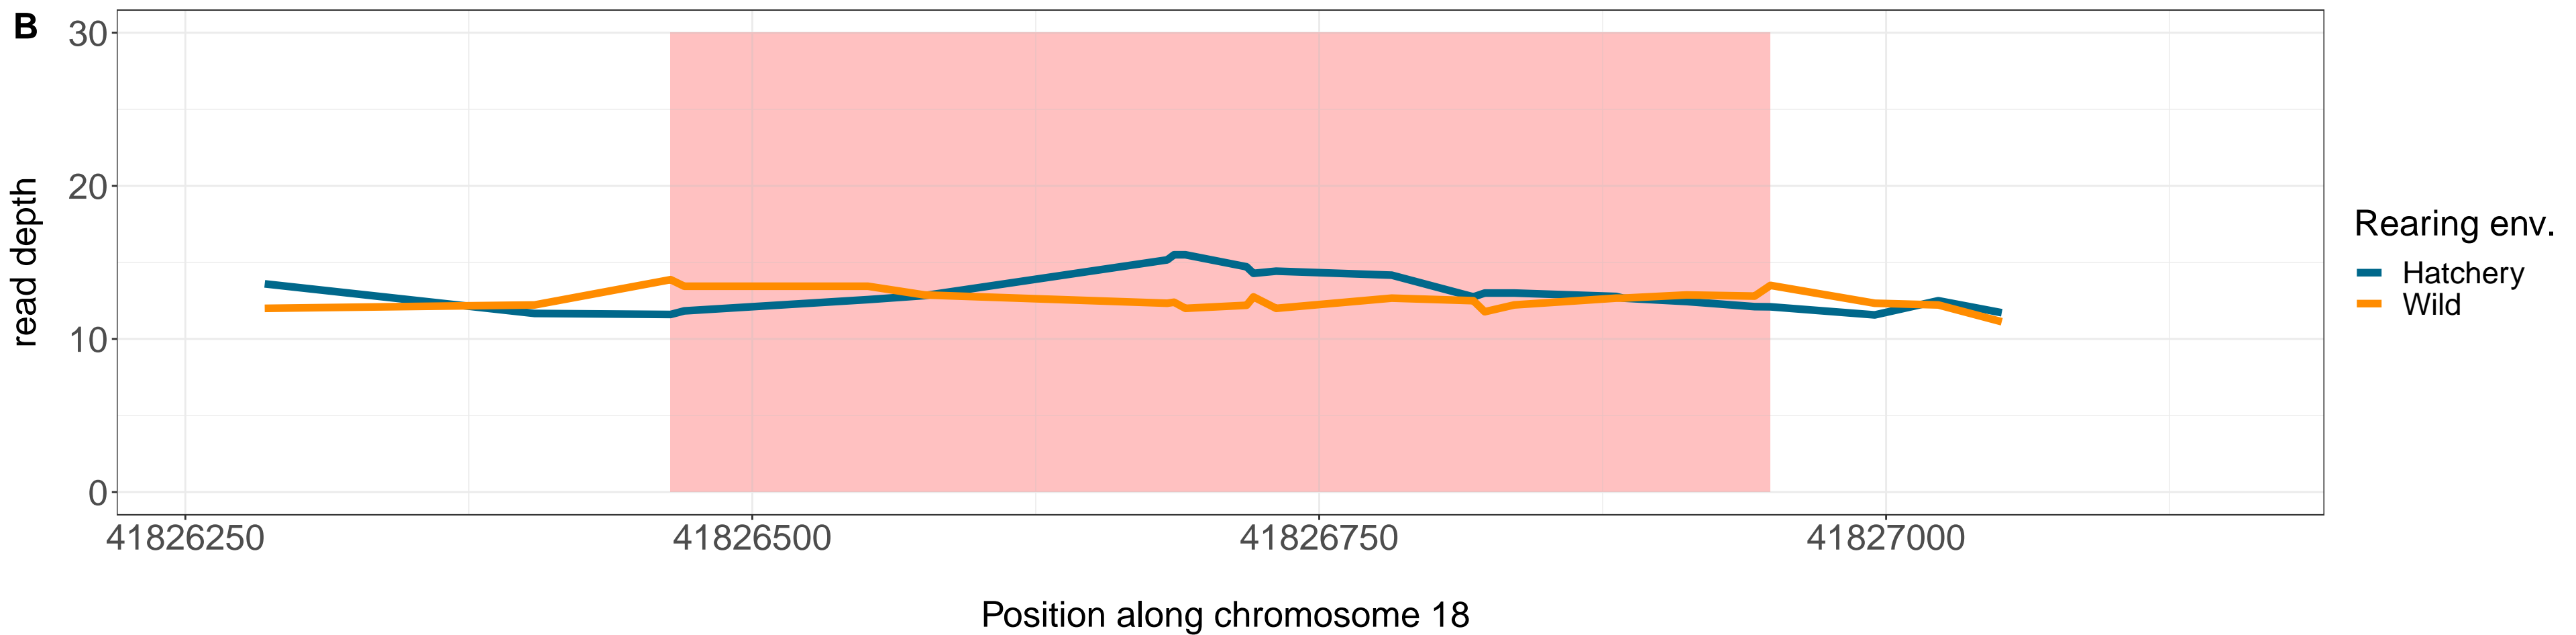

# DMR\_21

XM\_020473289.1

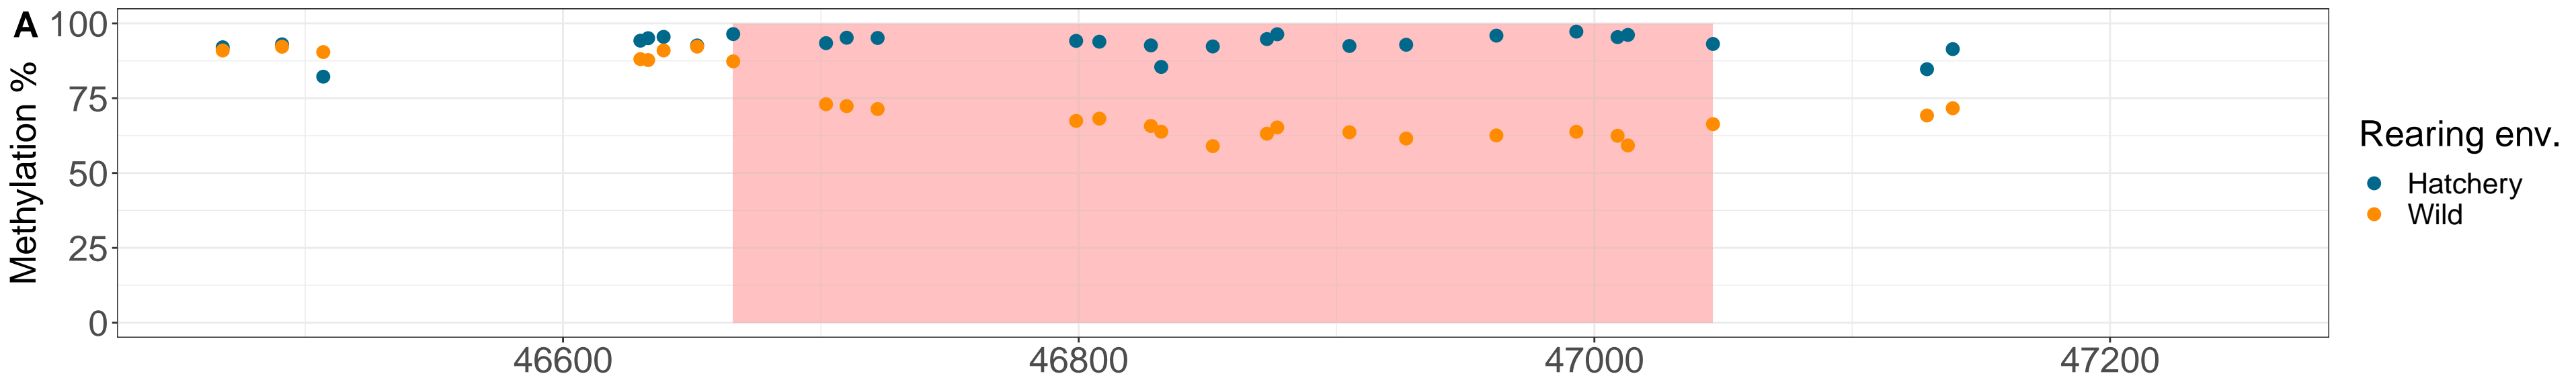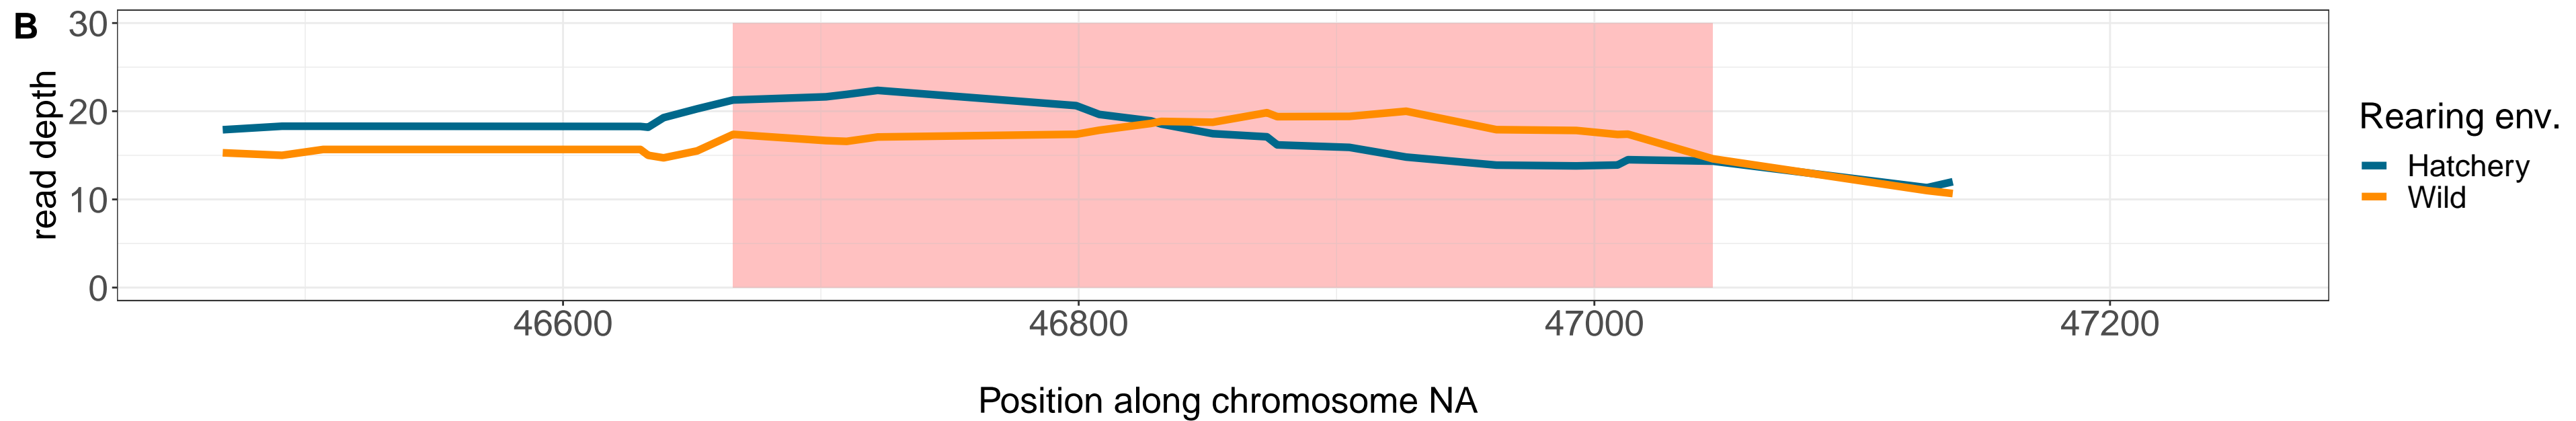

Position along chromosome NA

# DMR\_22

XM\_020453590.1

XM\_020453589.1

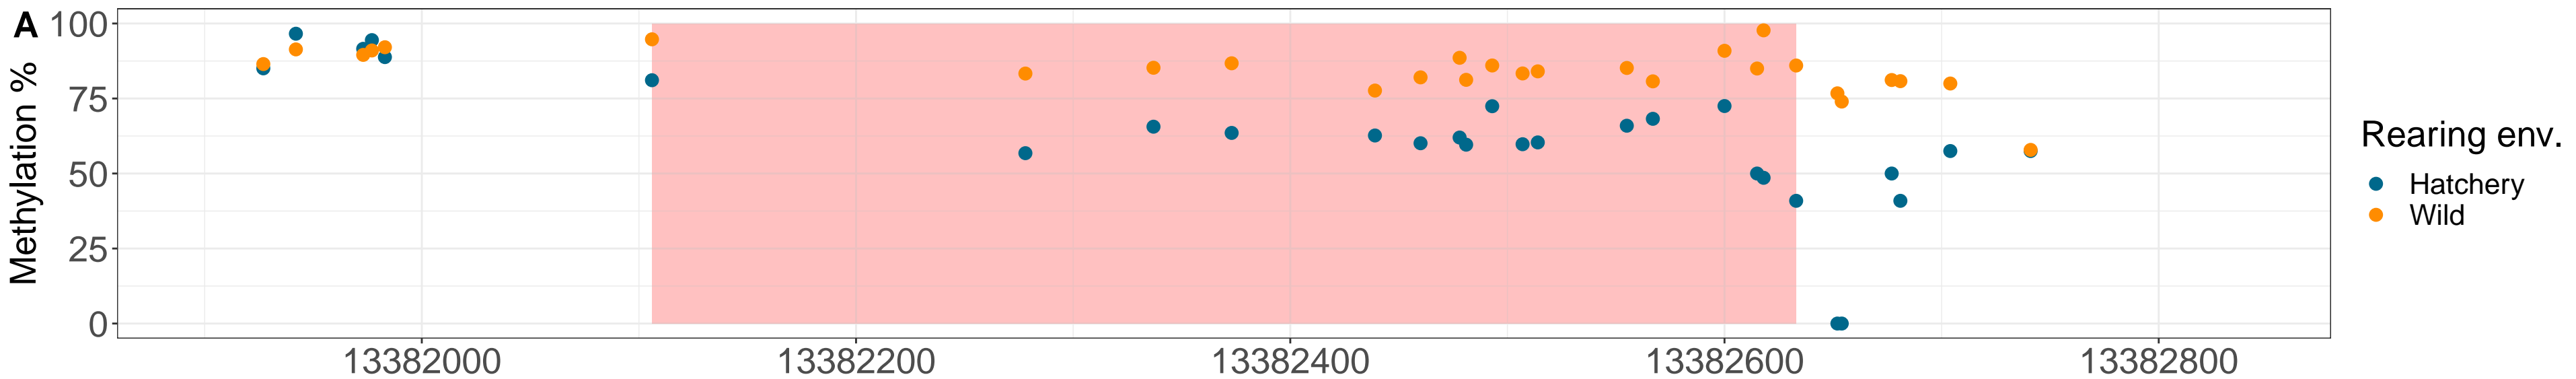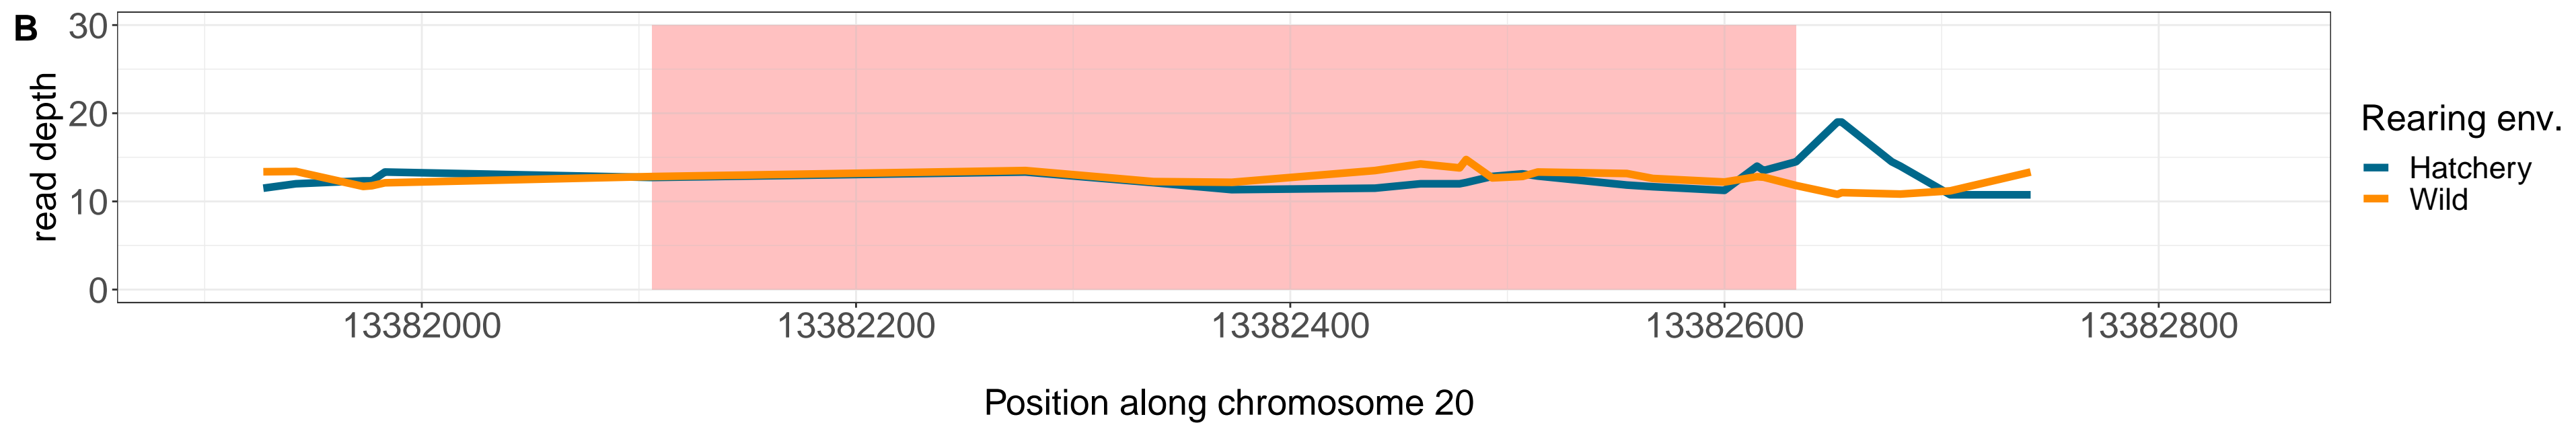

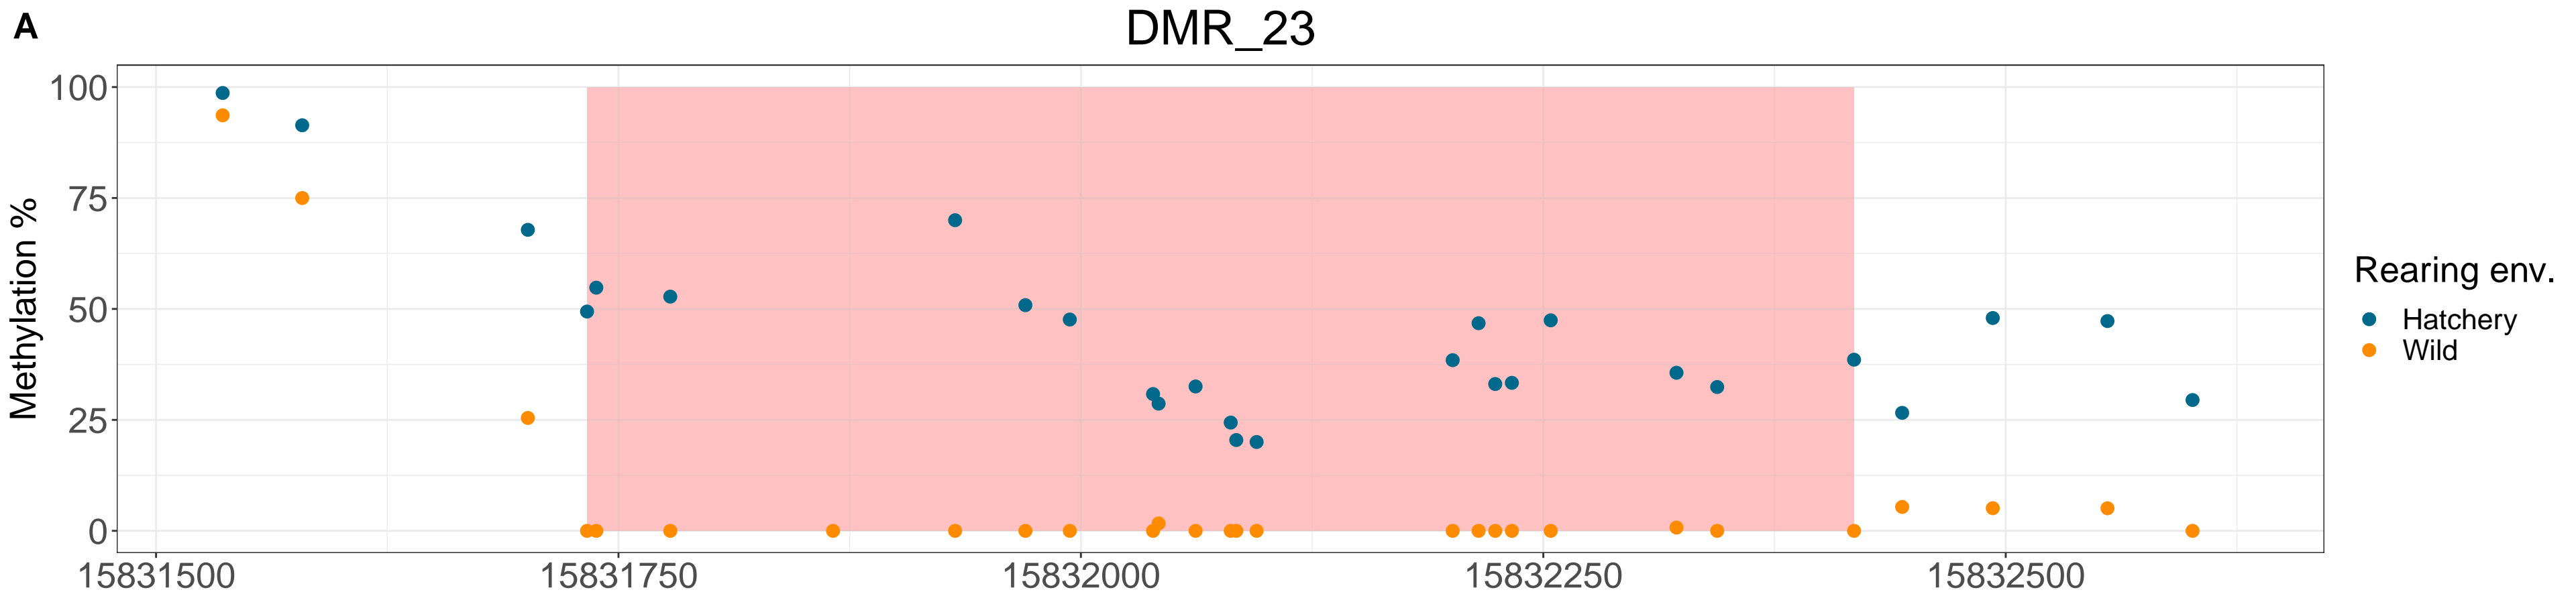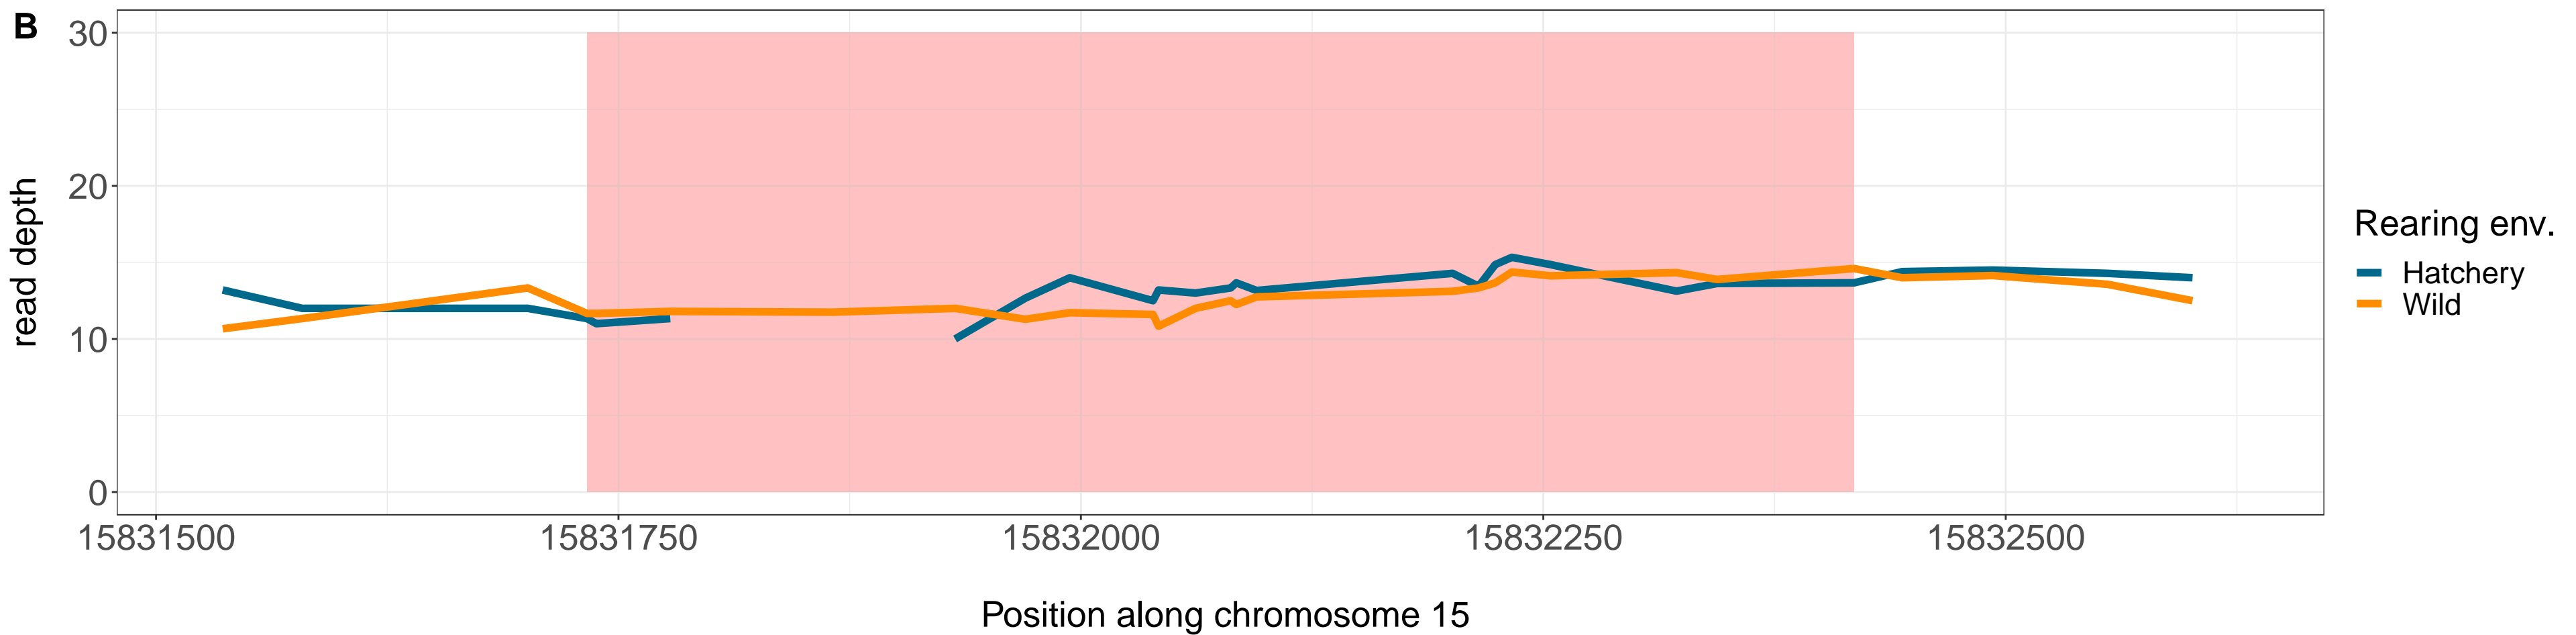

# DMR\_24

XM\_020454244.1

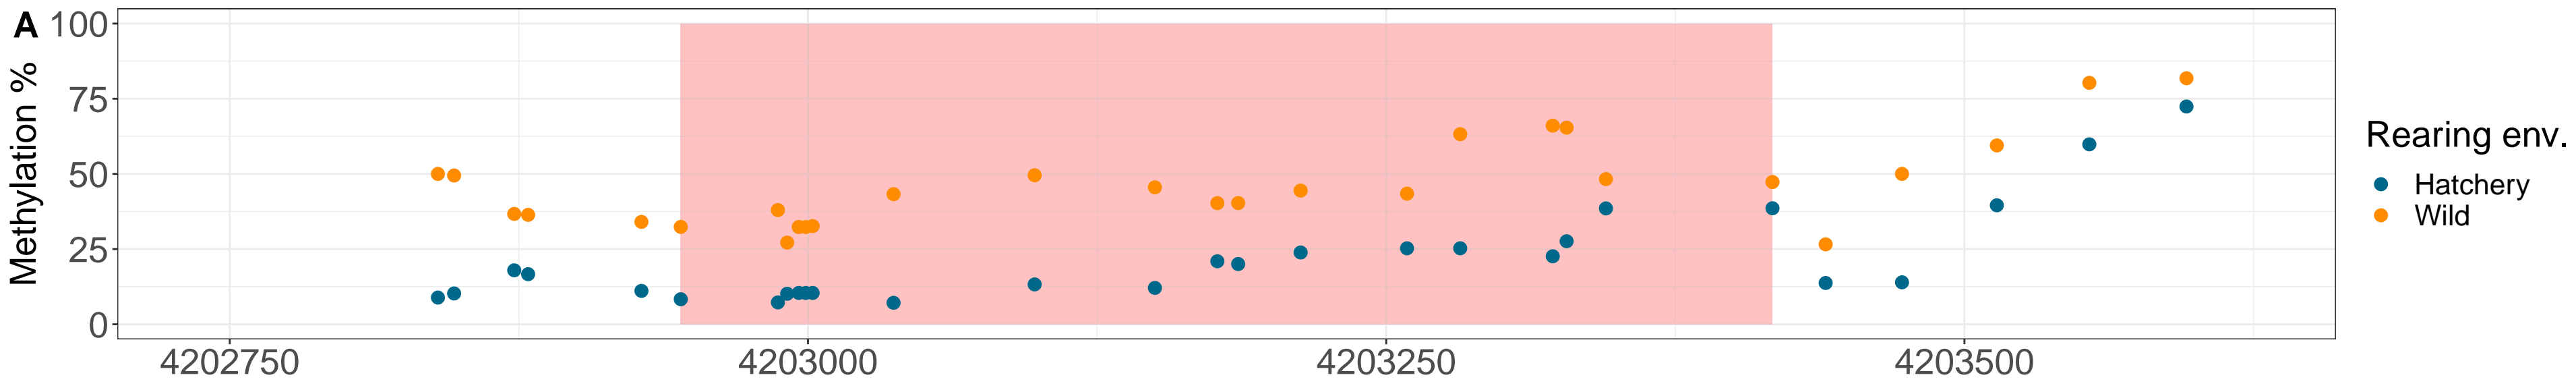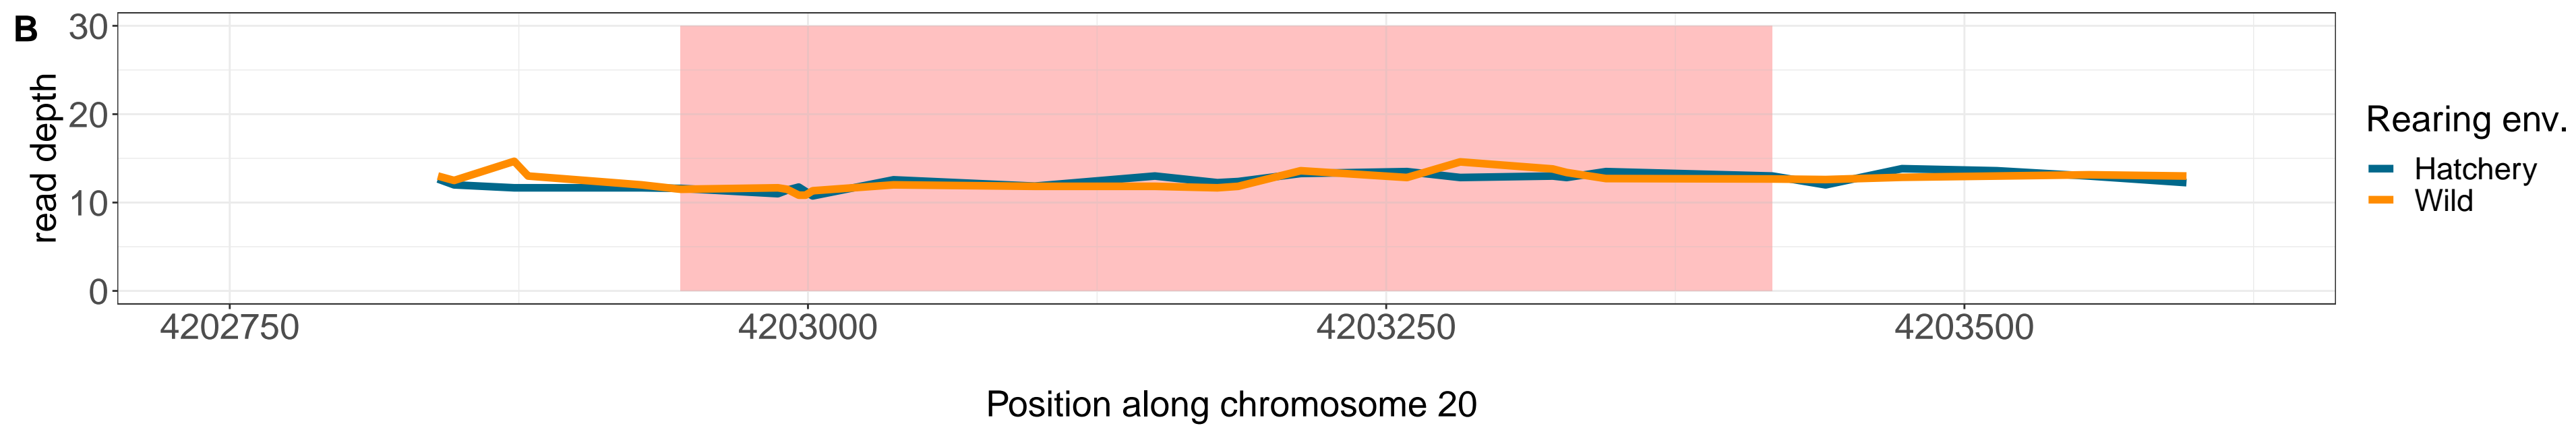

Position along chromosome 20



**A**

## DMR\_25

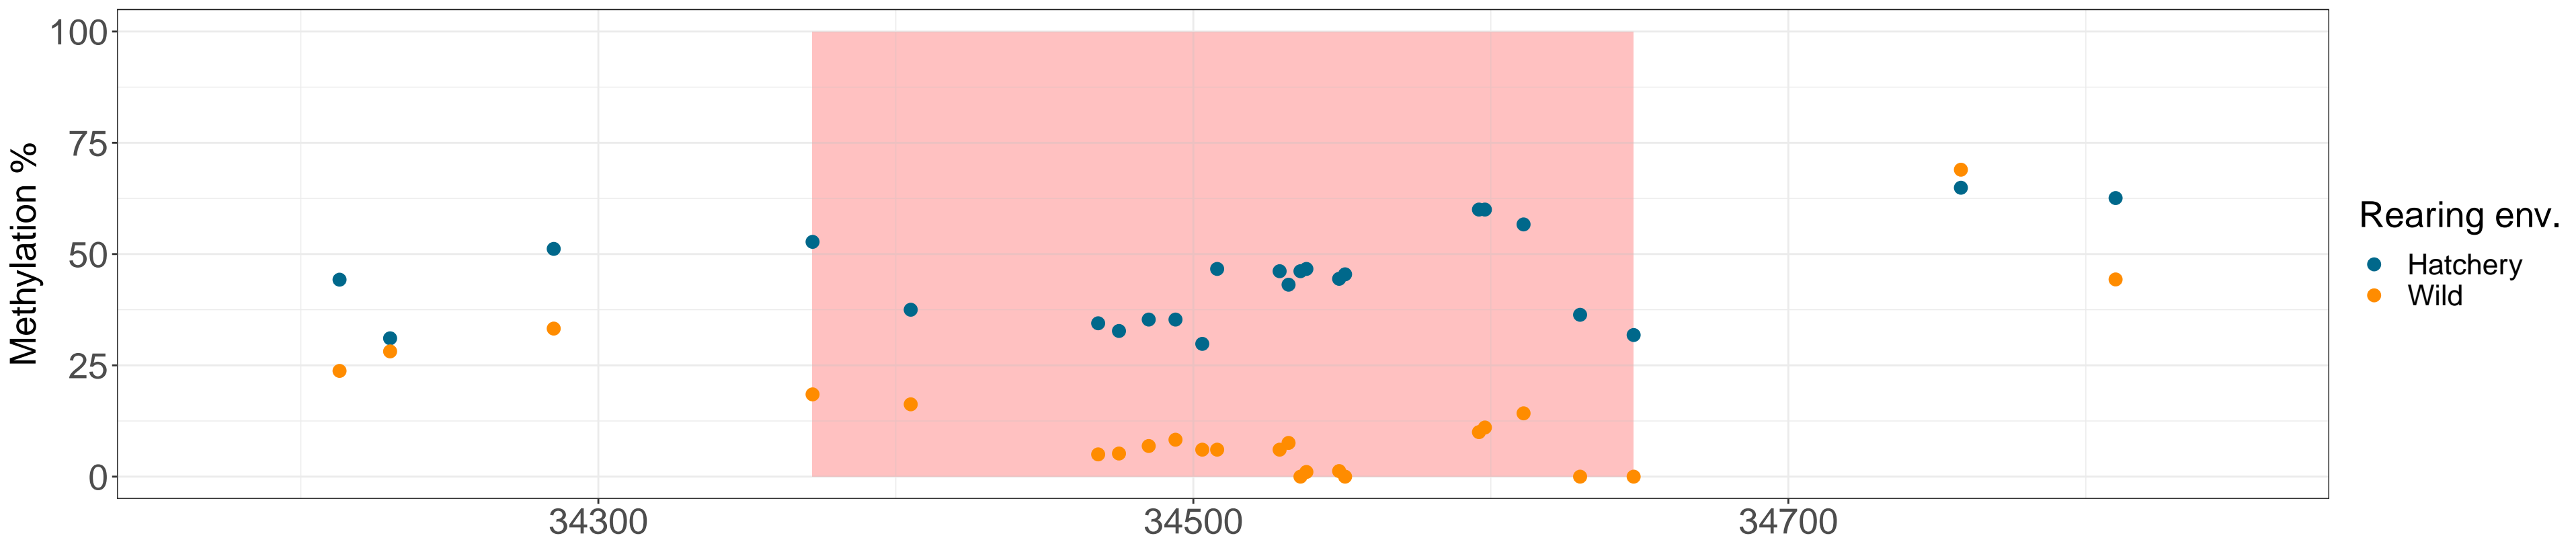**B**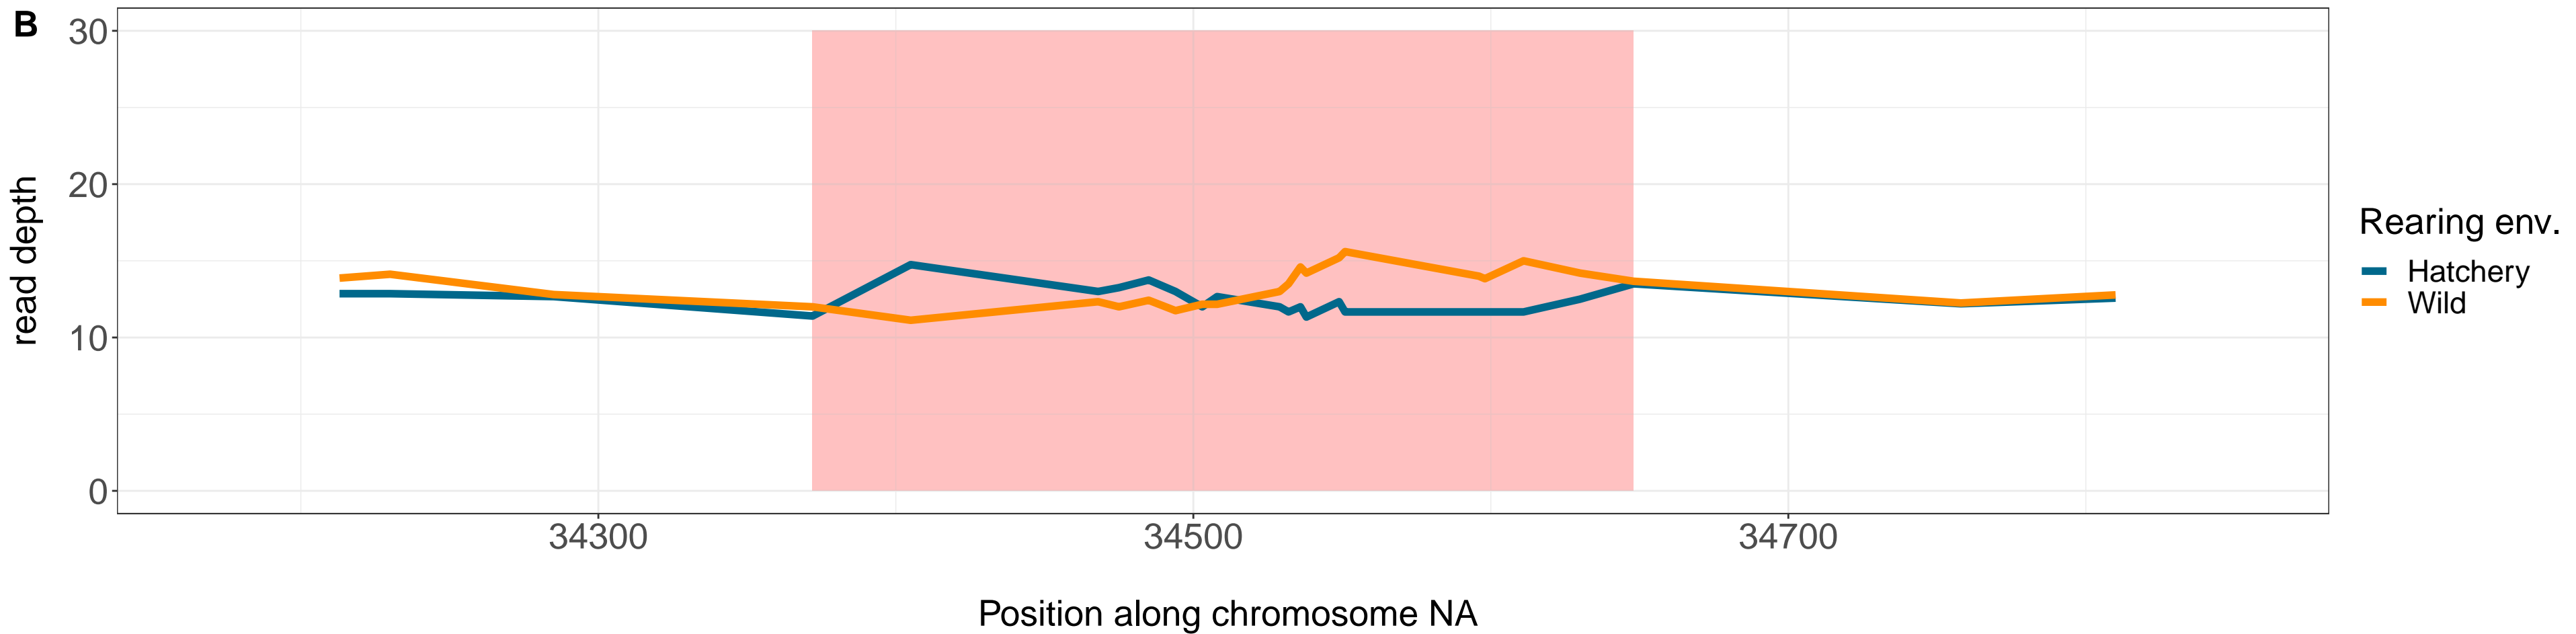

**A**

## DMR\_26

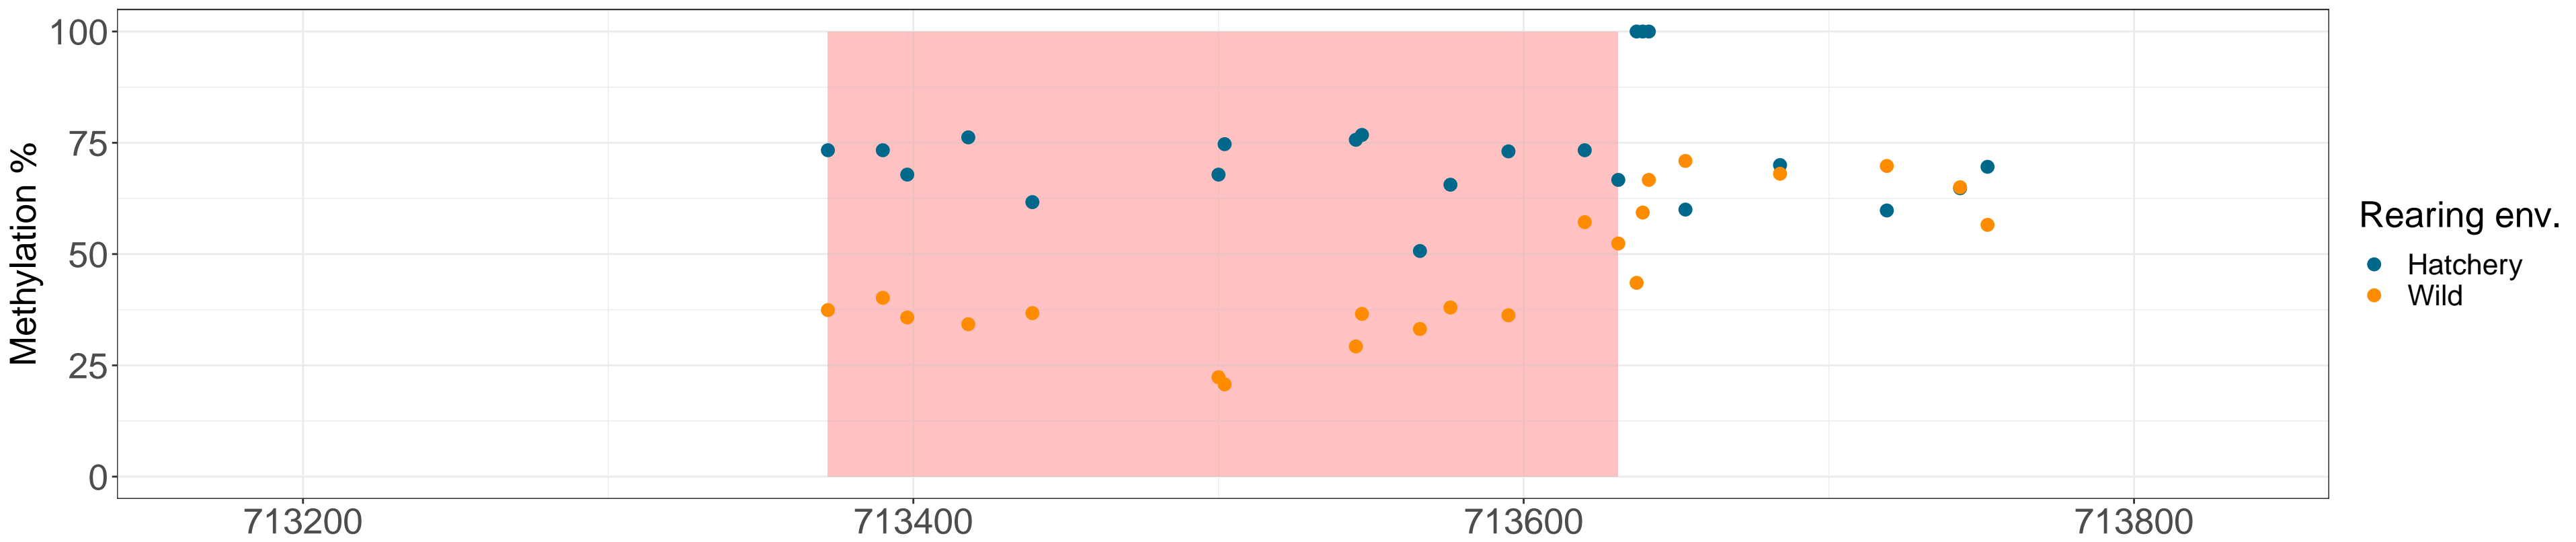**B**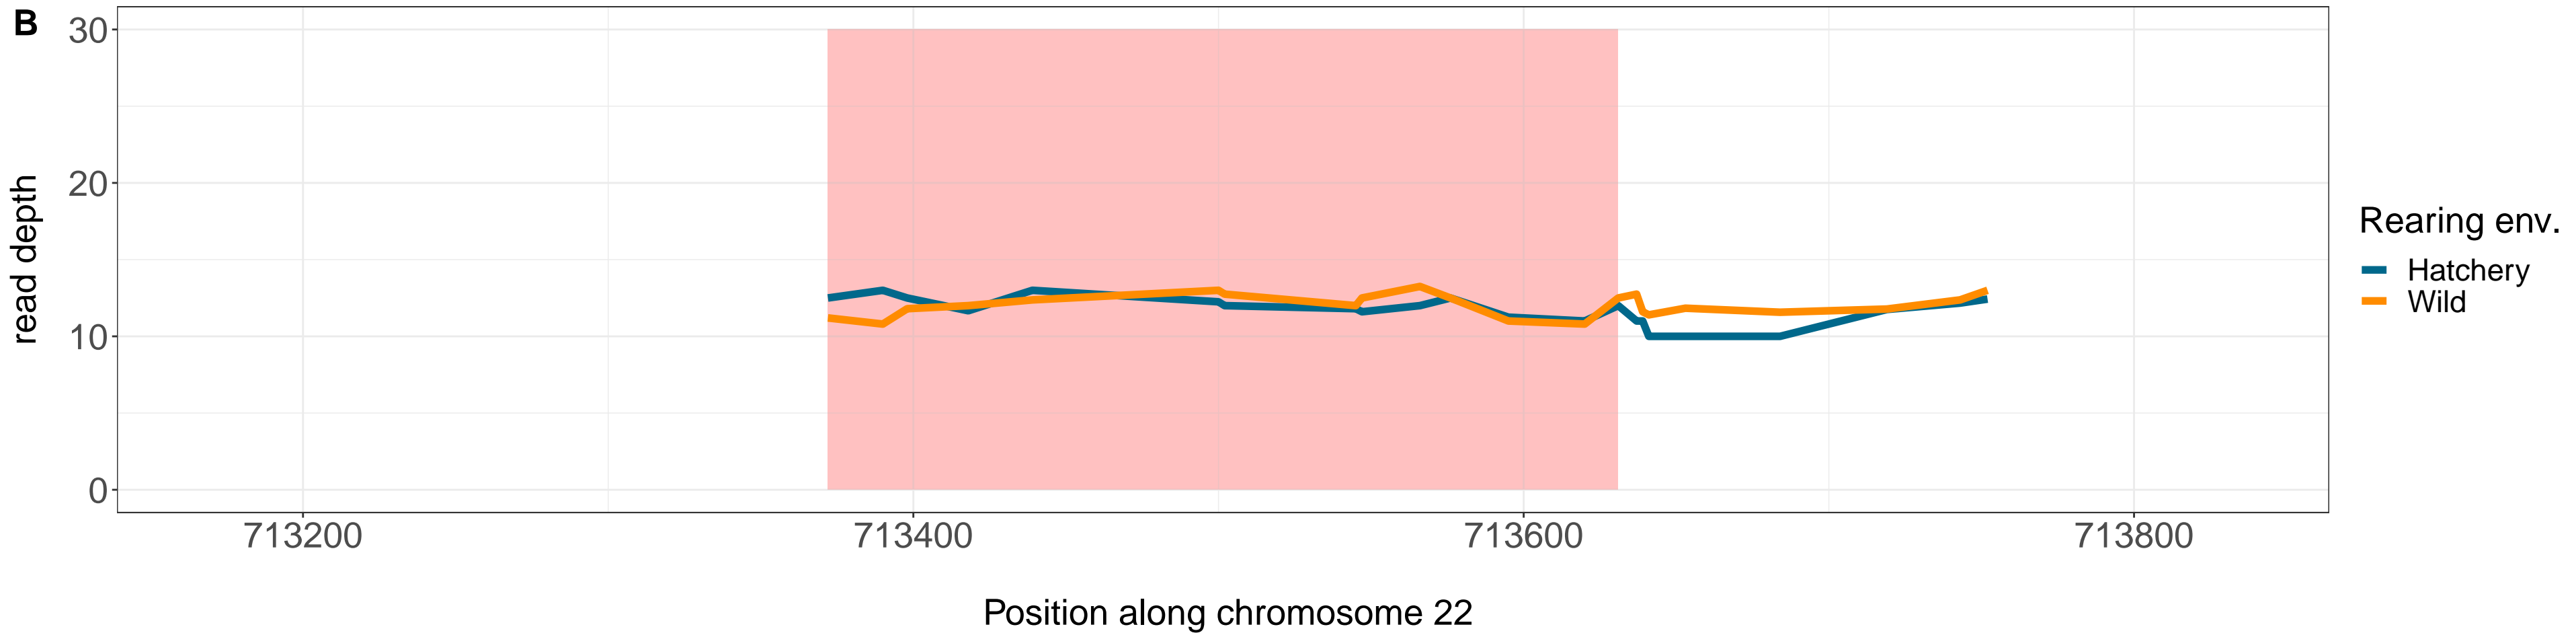

**A**

DMR\_27

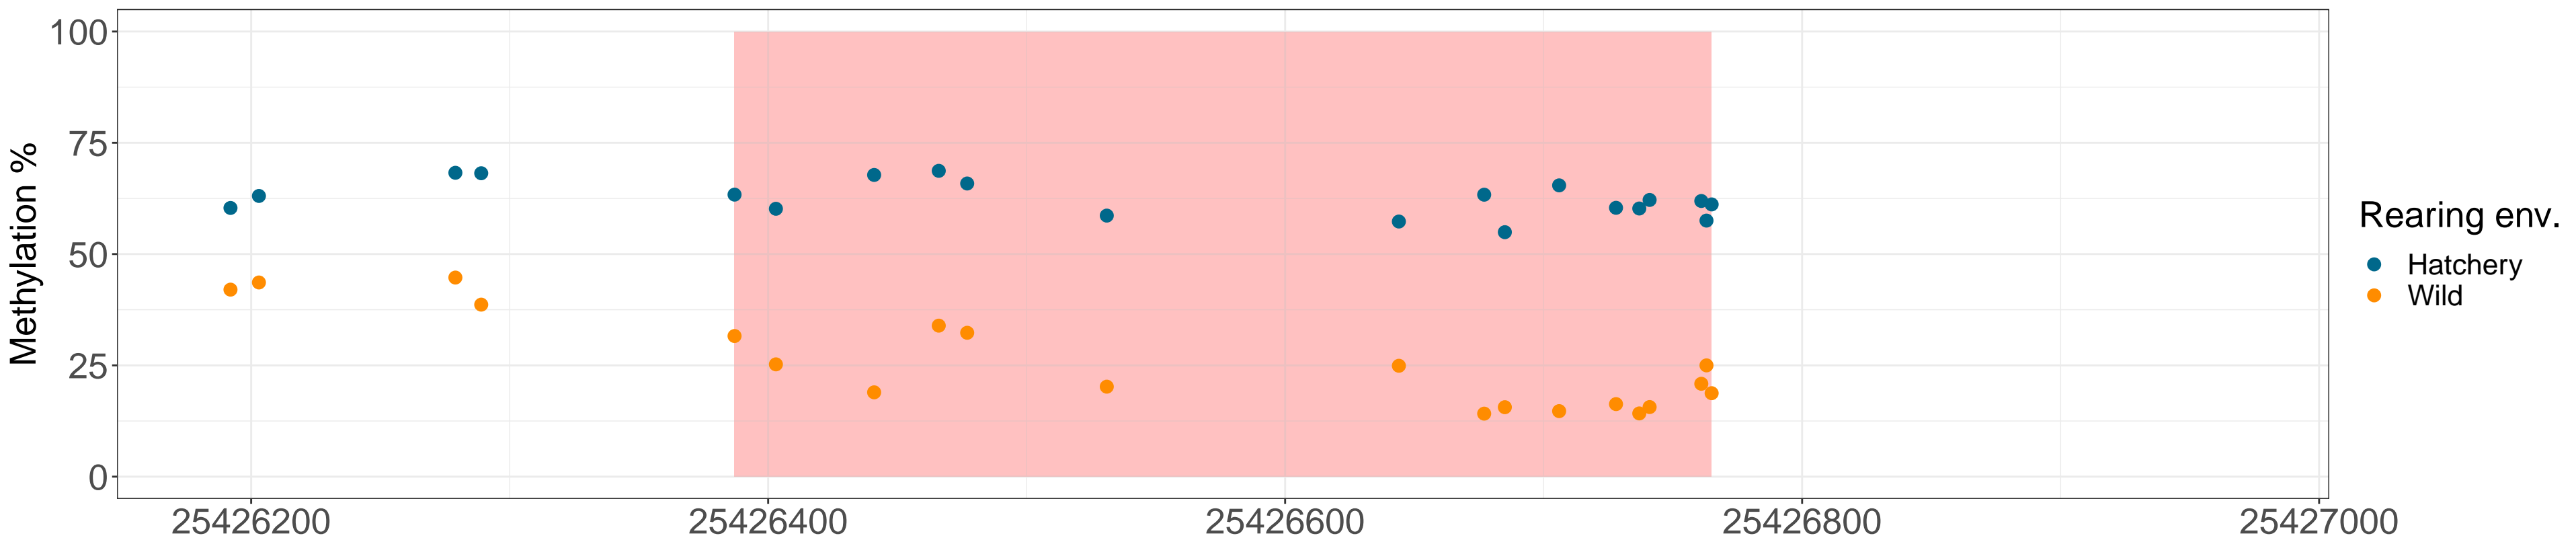**B**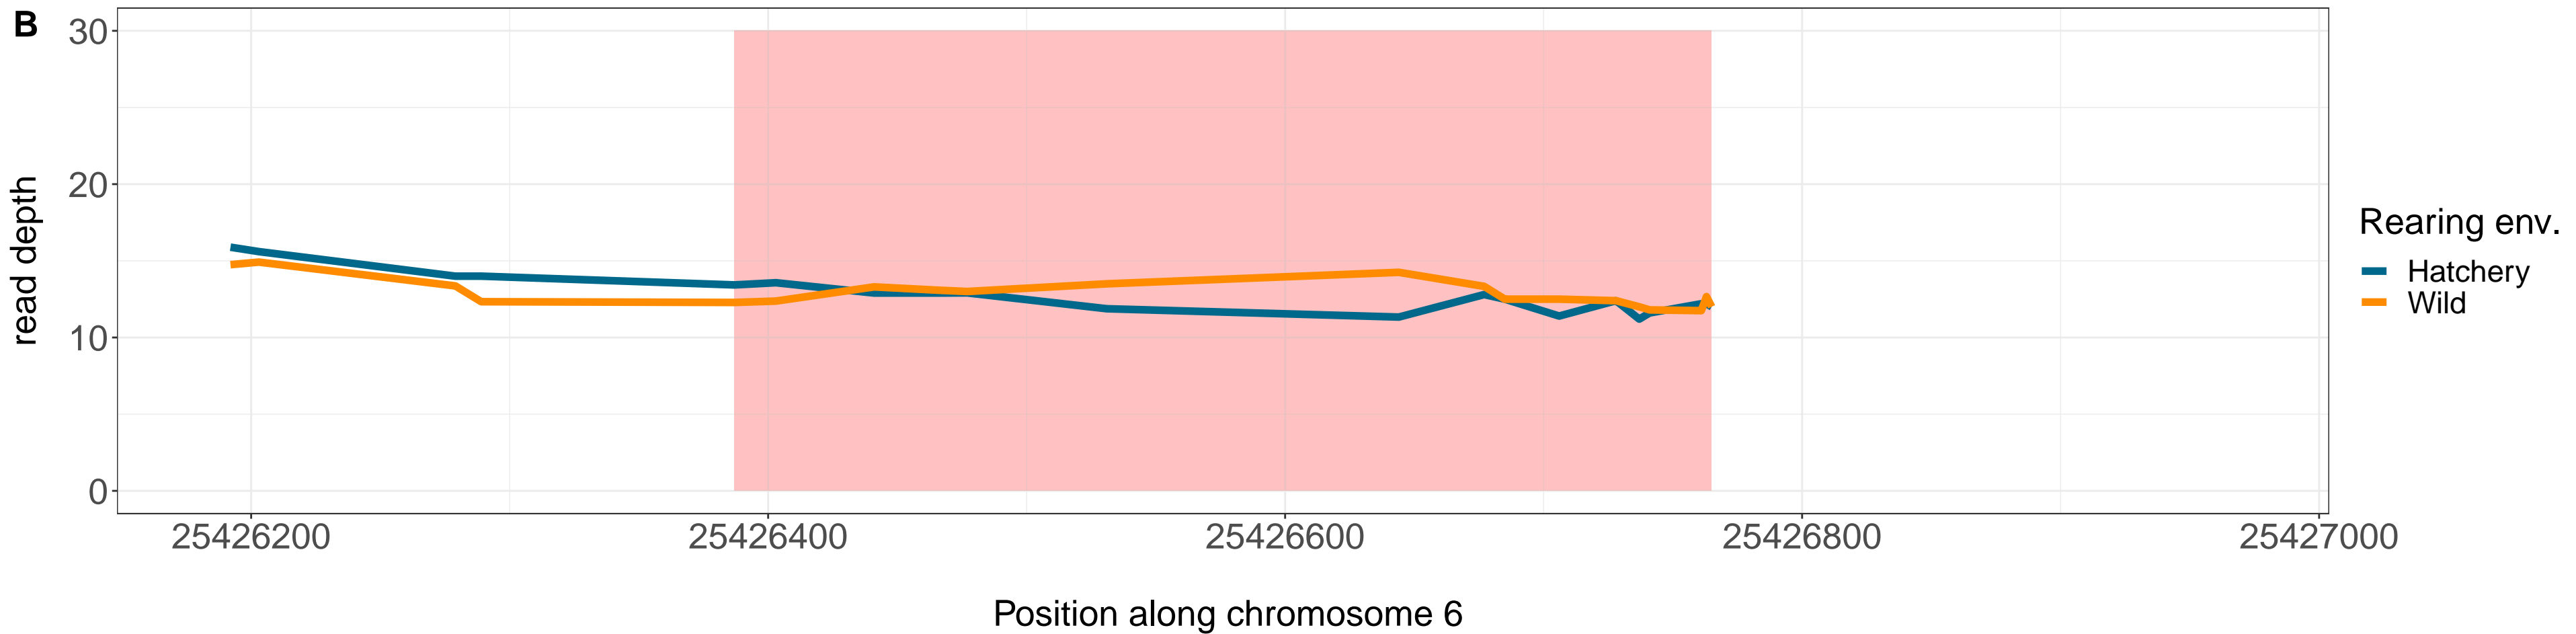

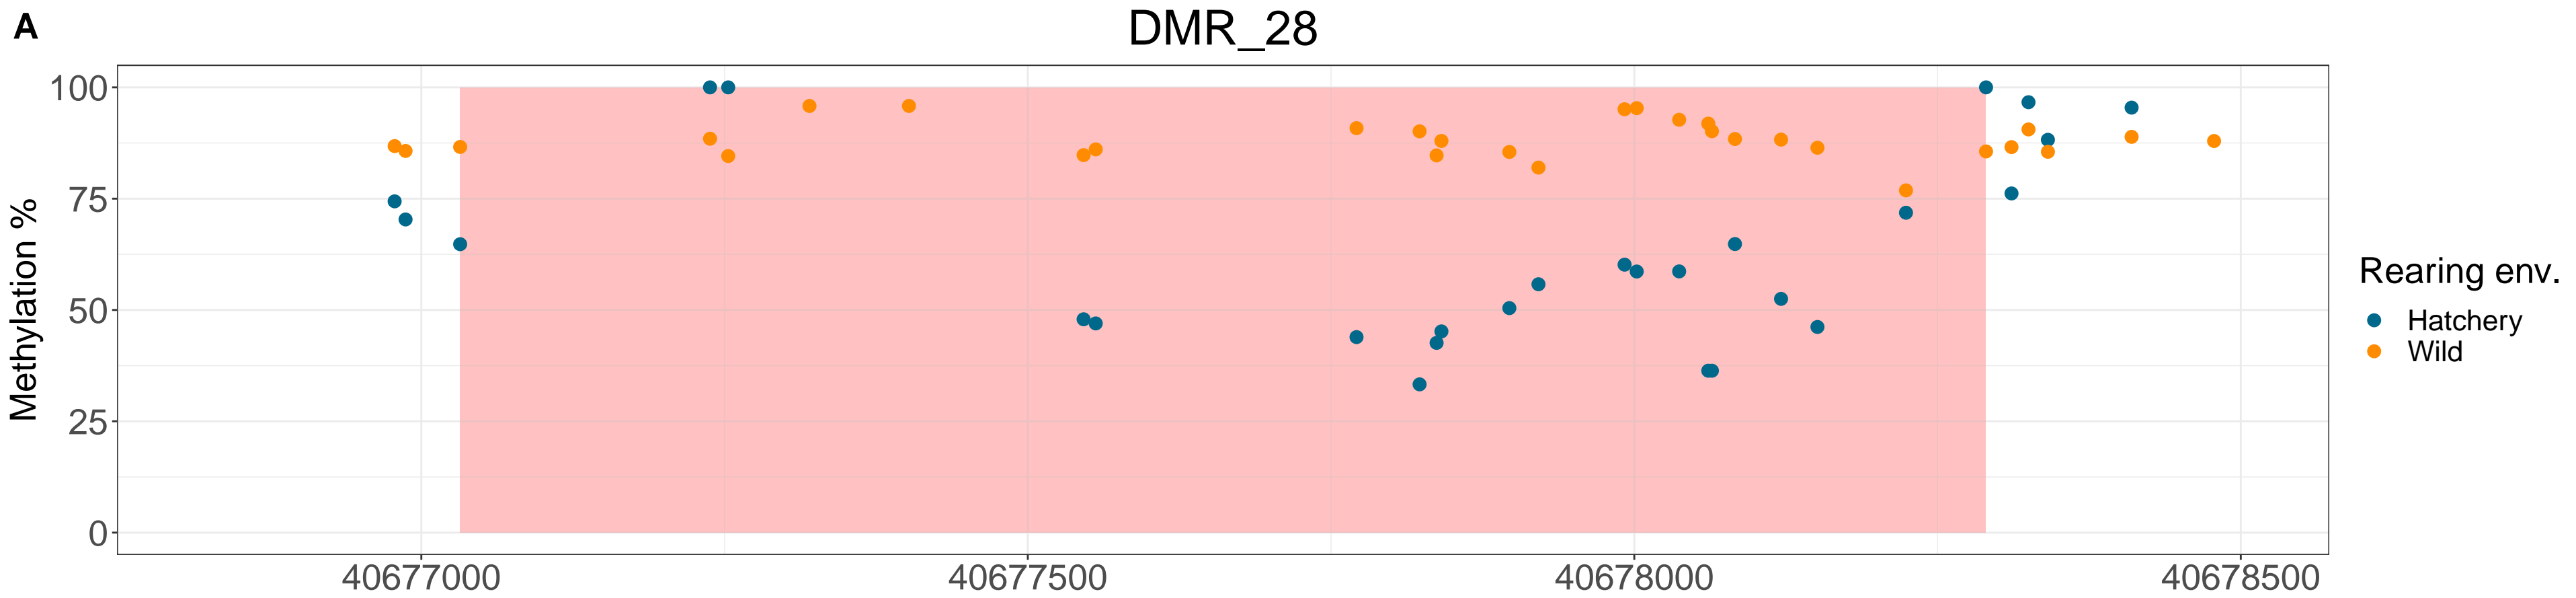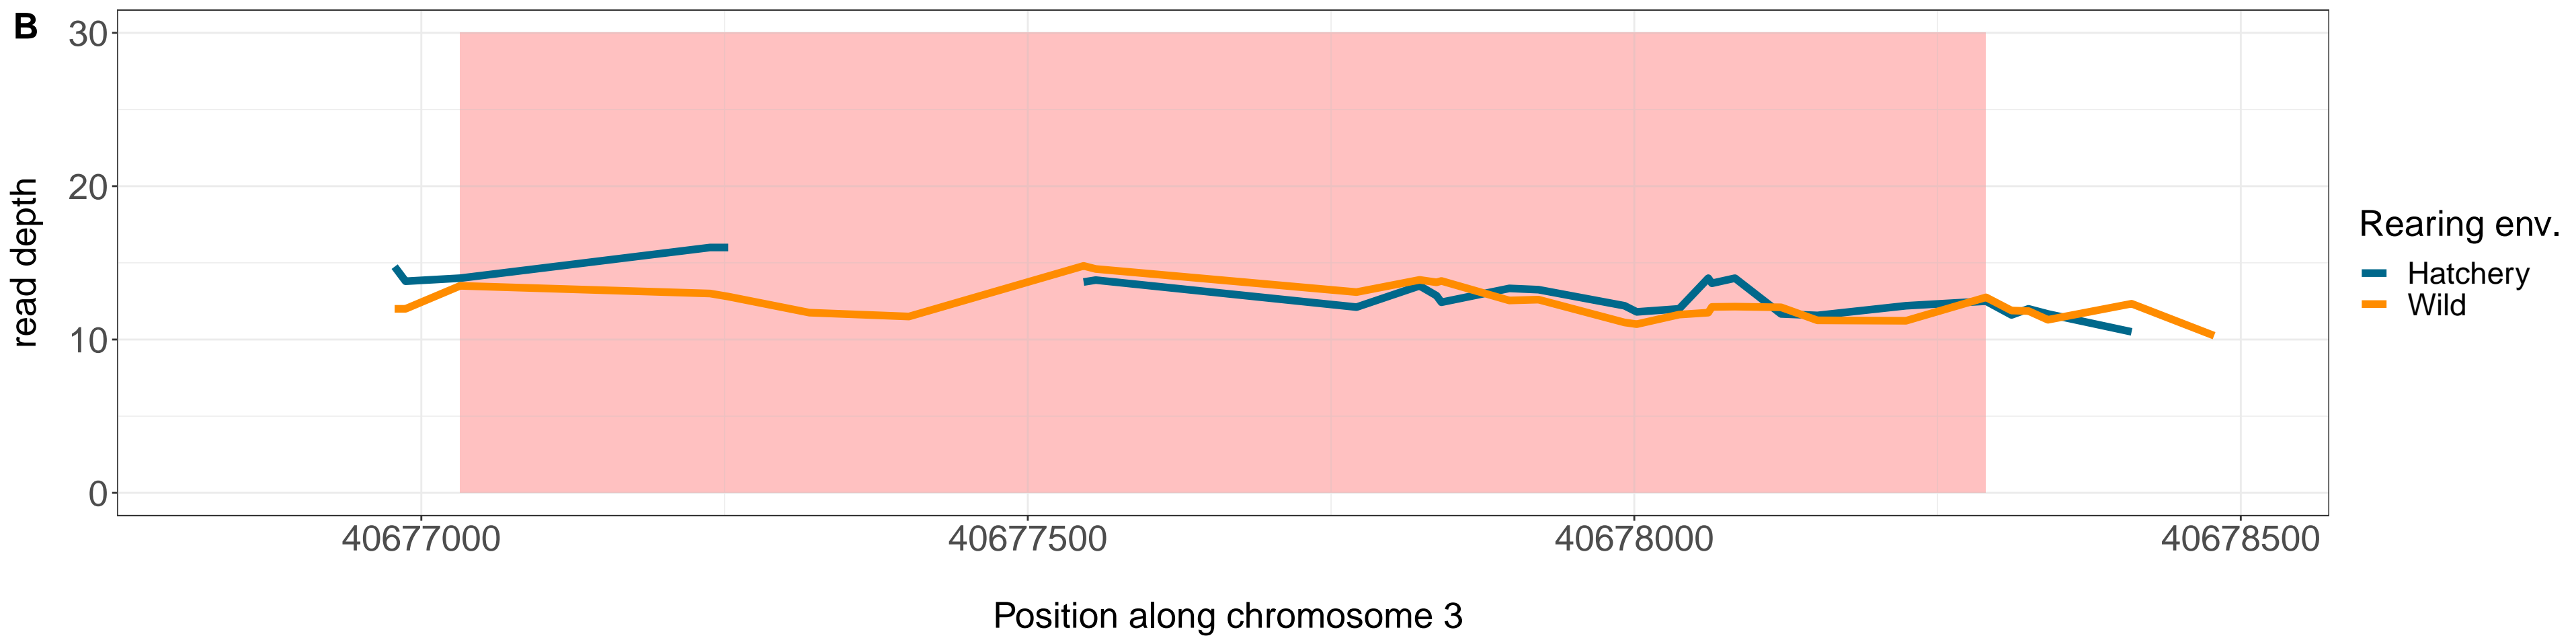

# DMR\_29

XM\_020498569.1

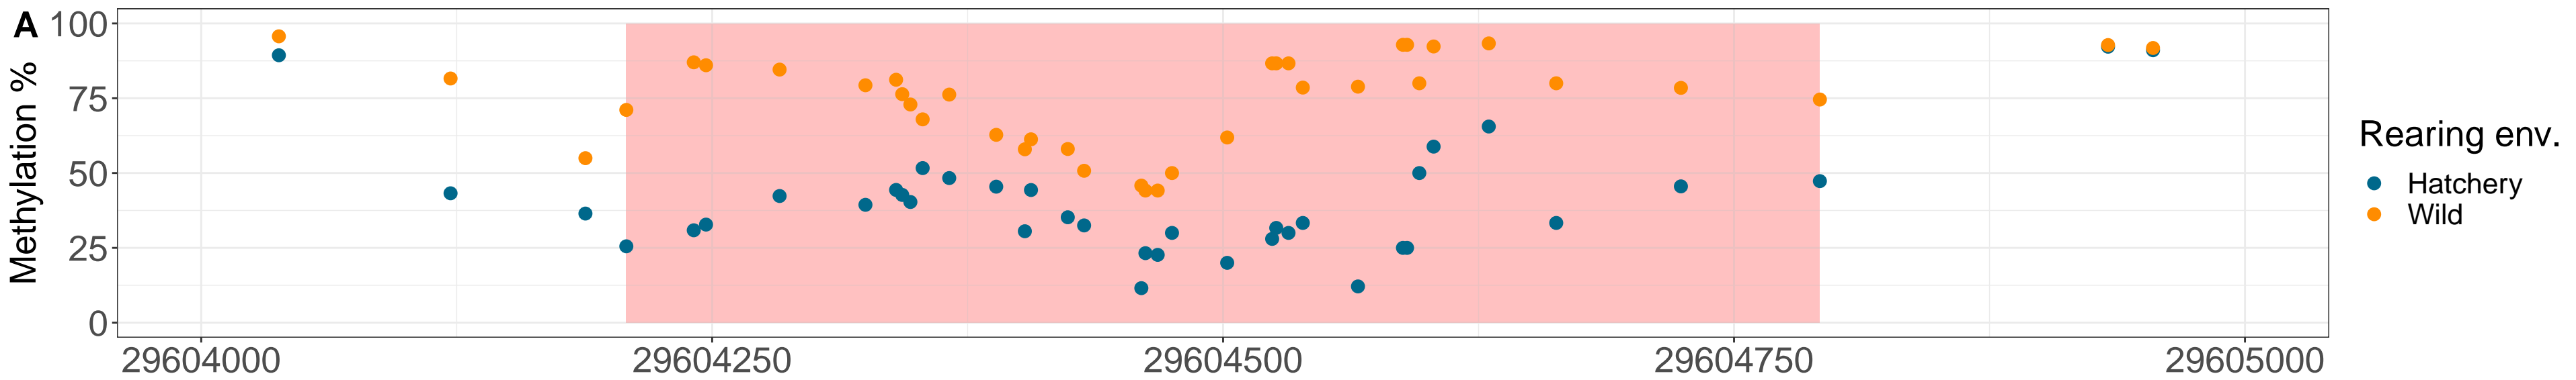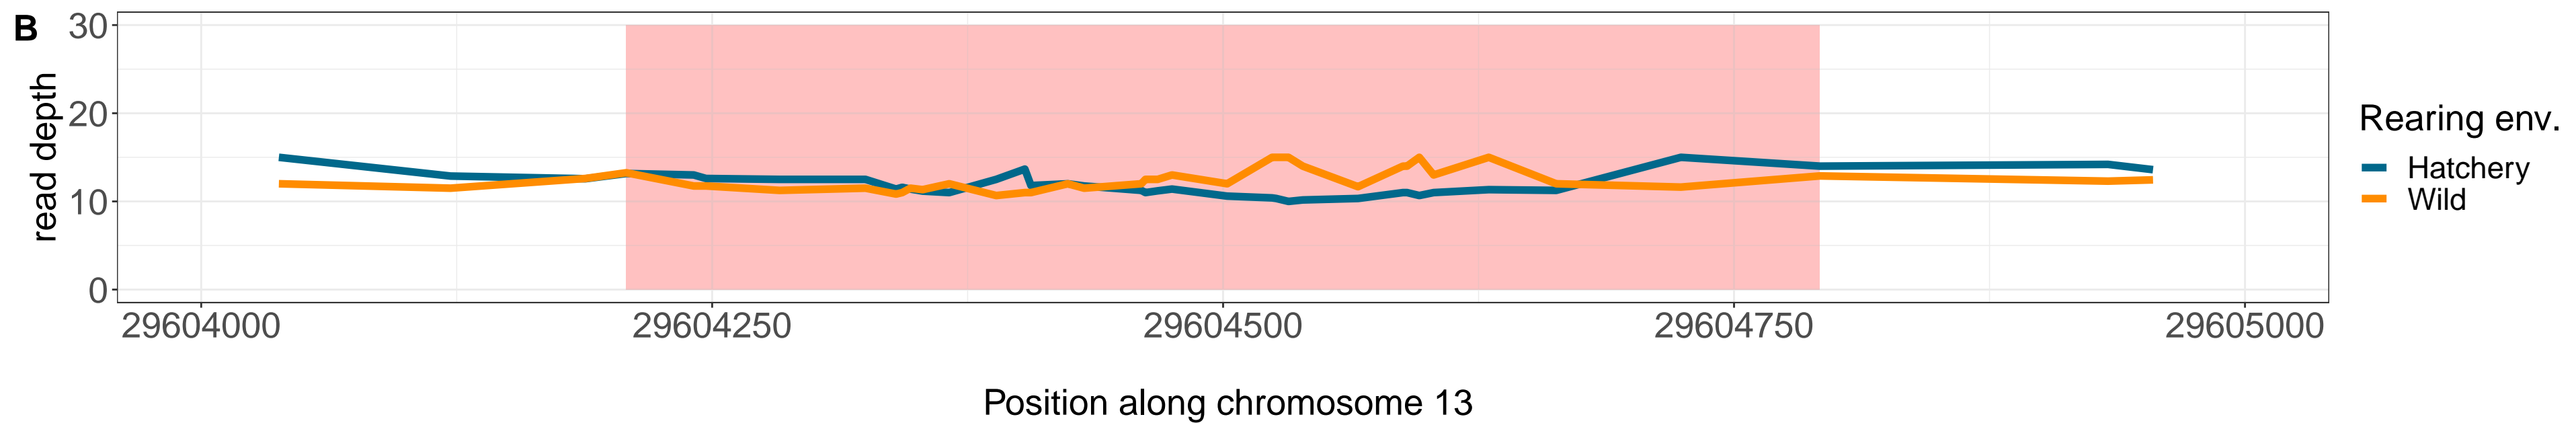

Position along chromosome 13

**A**

## DMR\_30

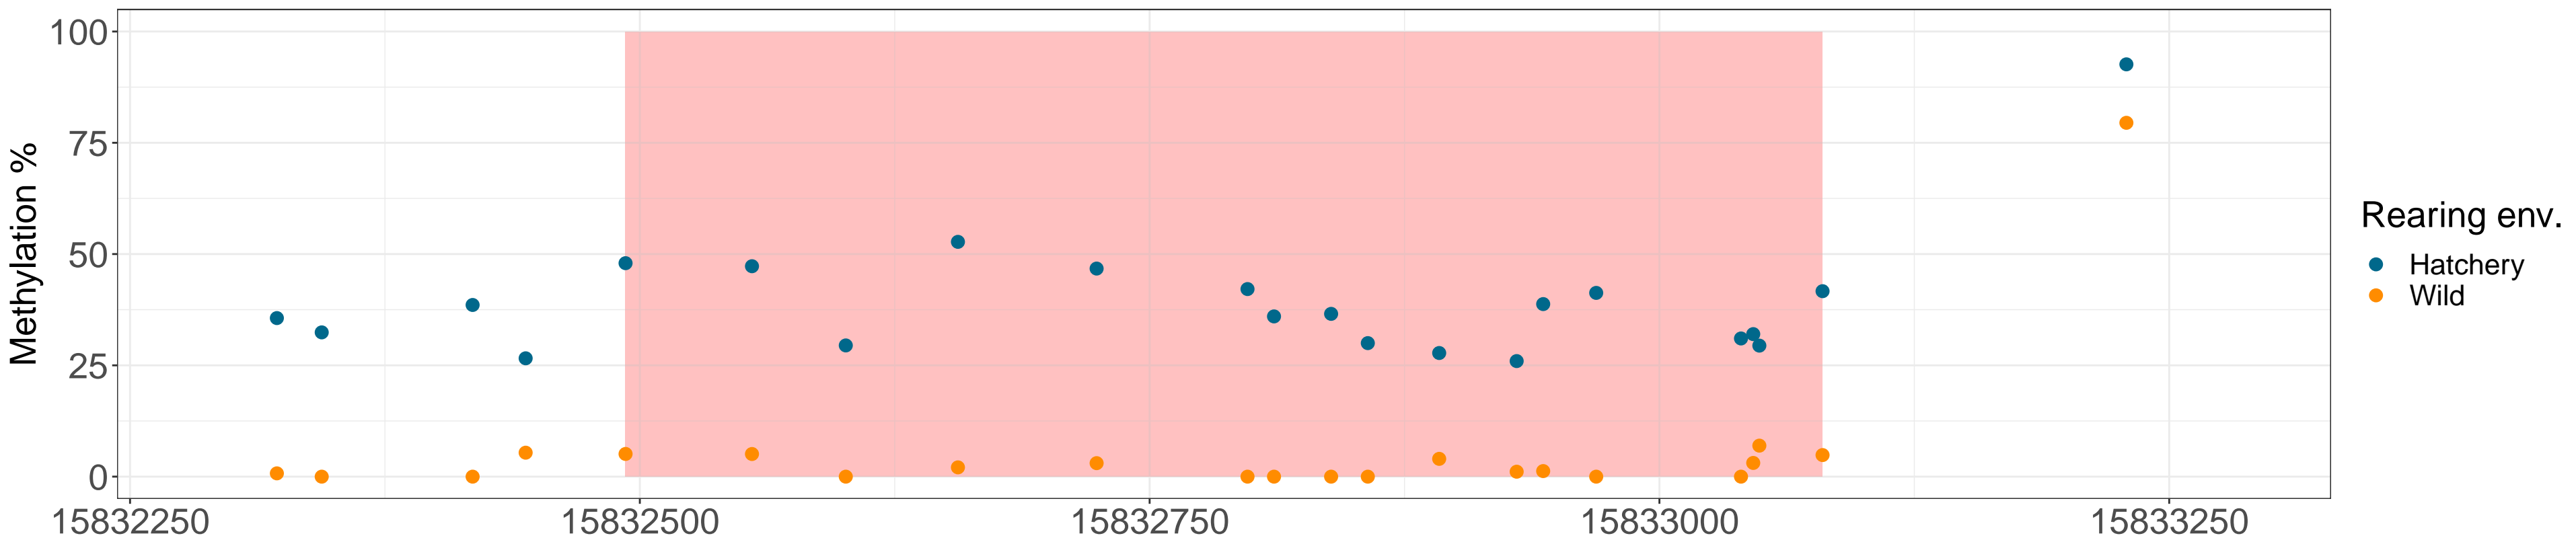**B**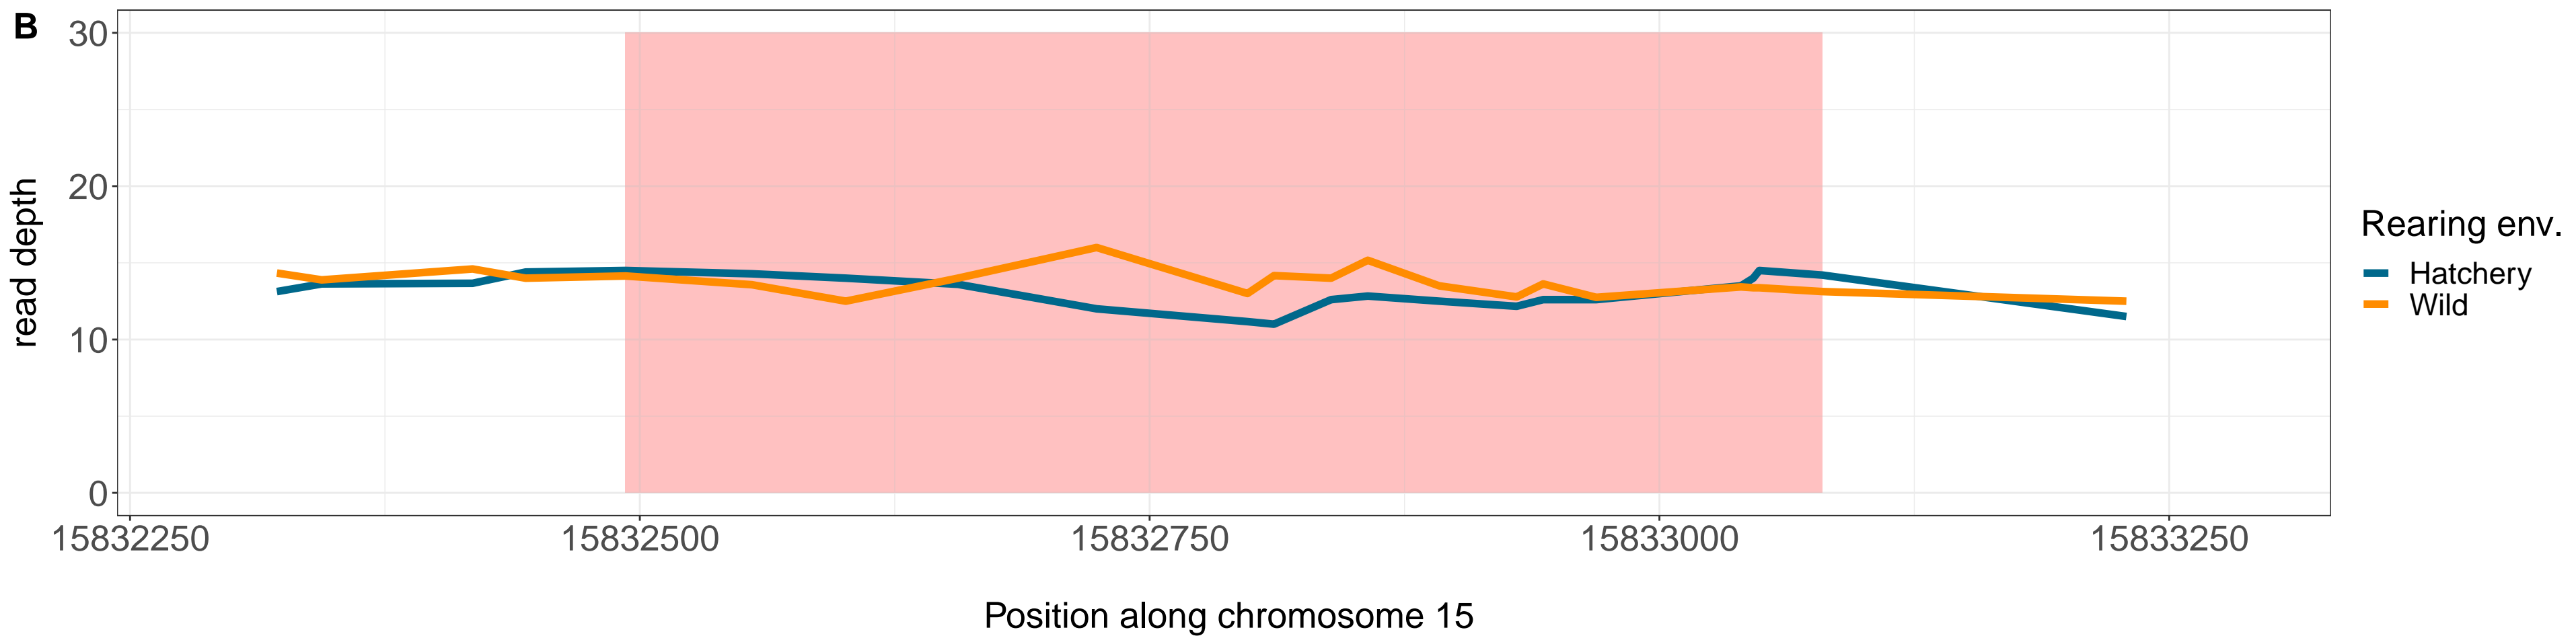

# DMR\_31

XM\_020455141.1

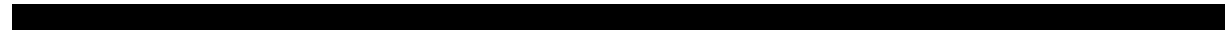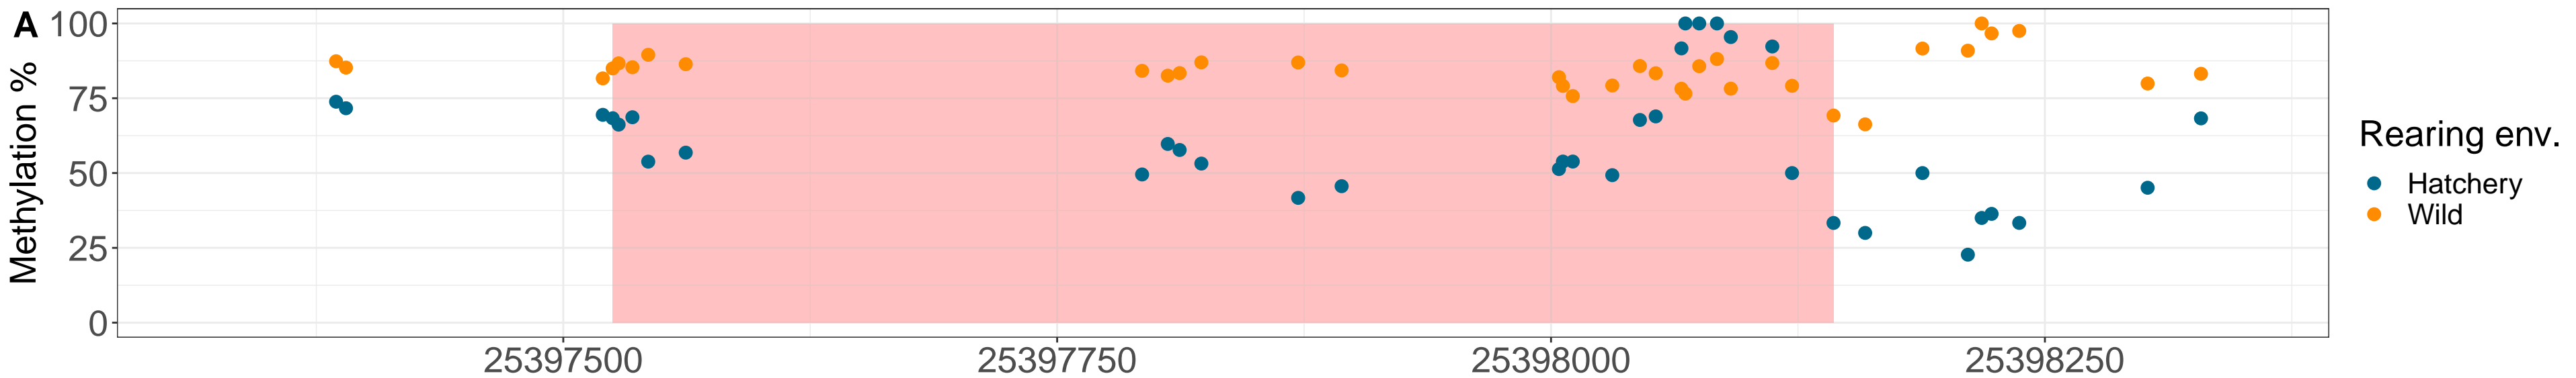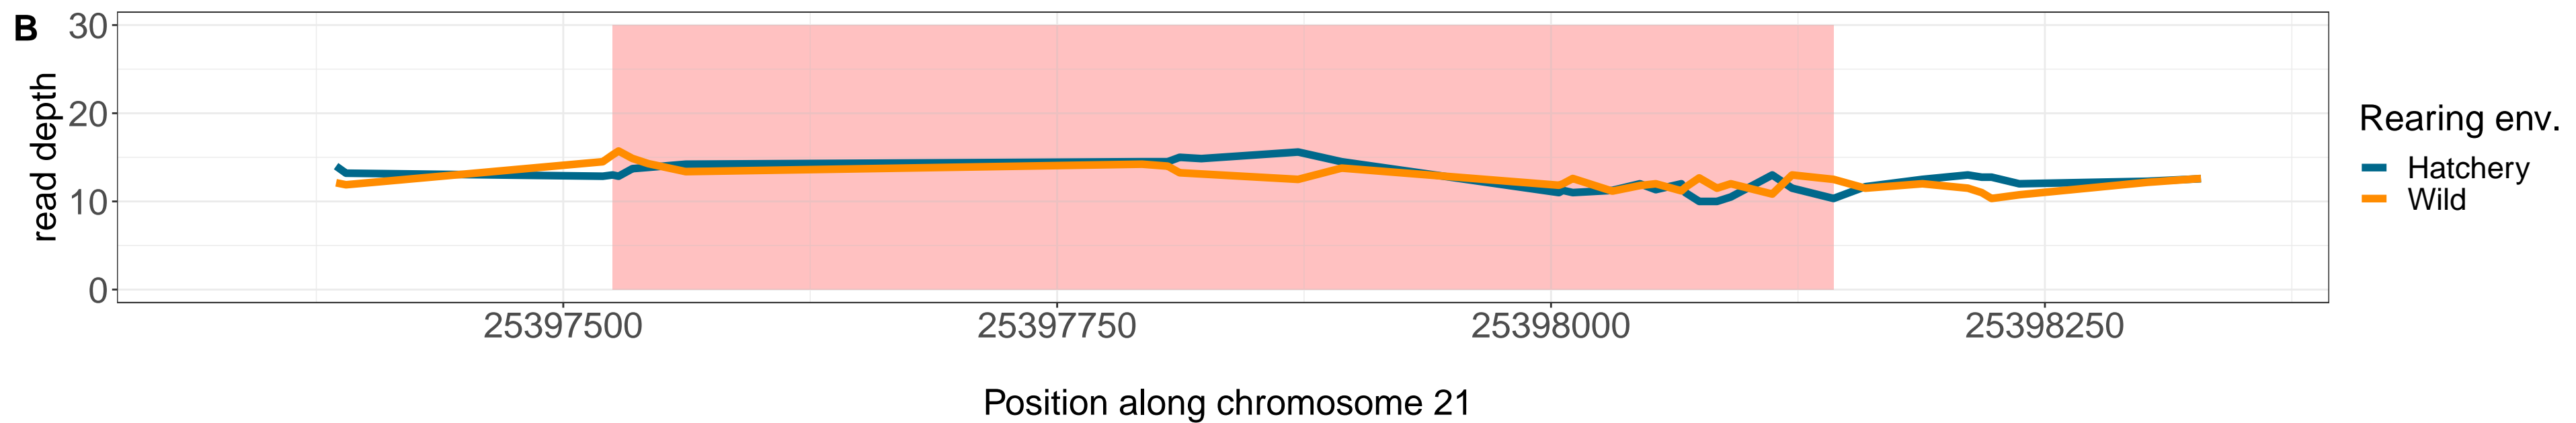

# DMR\_32

XM\_020457788.1

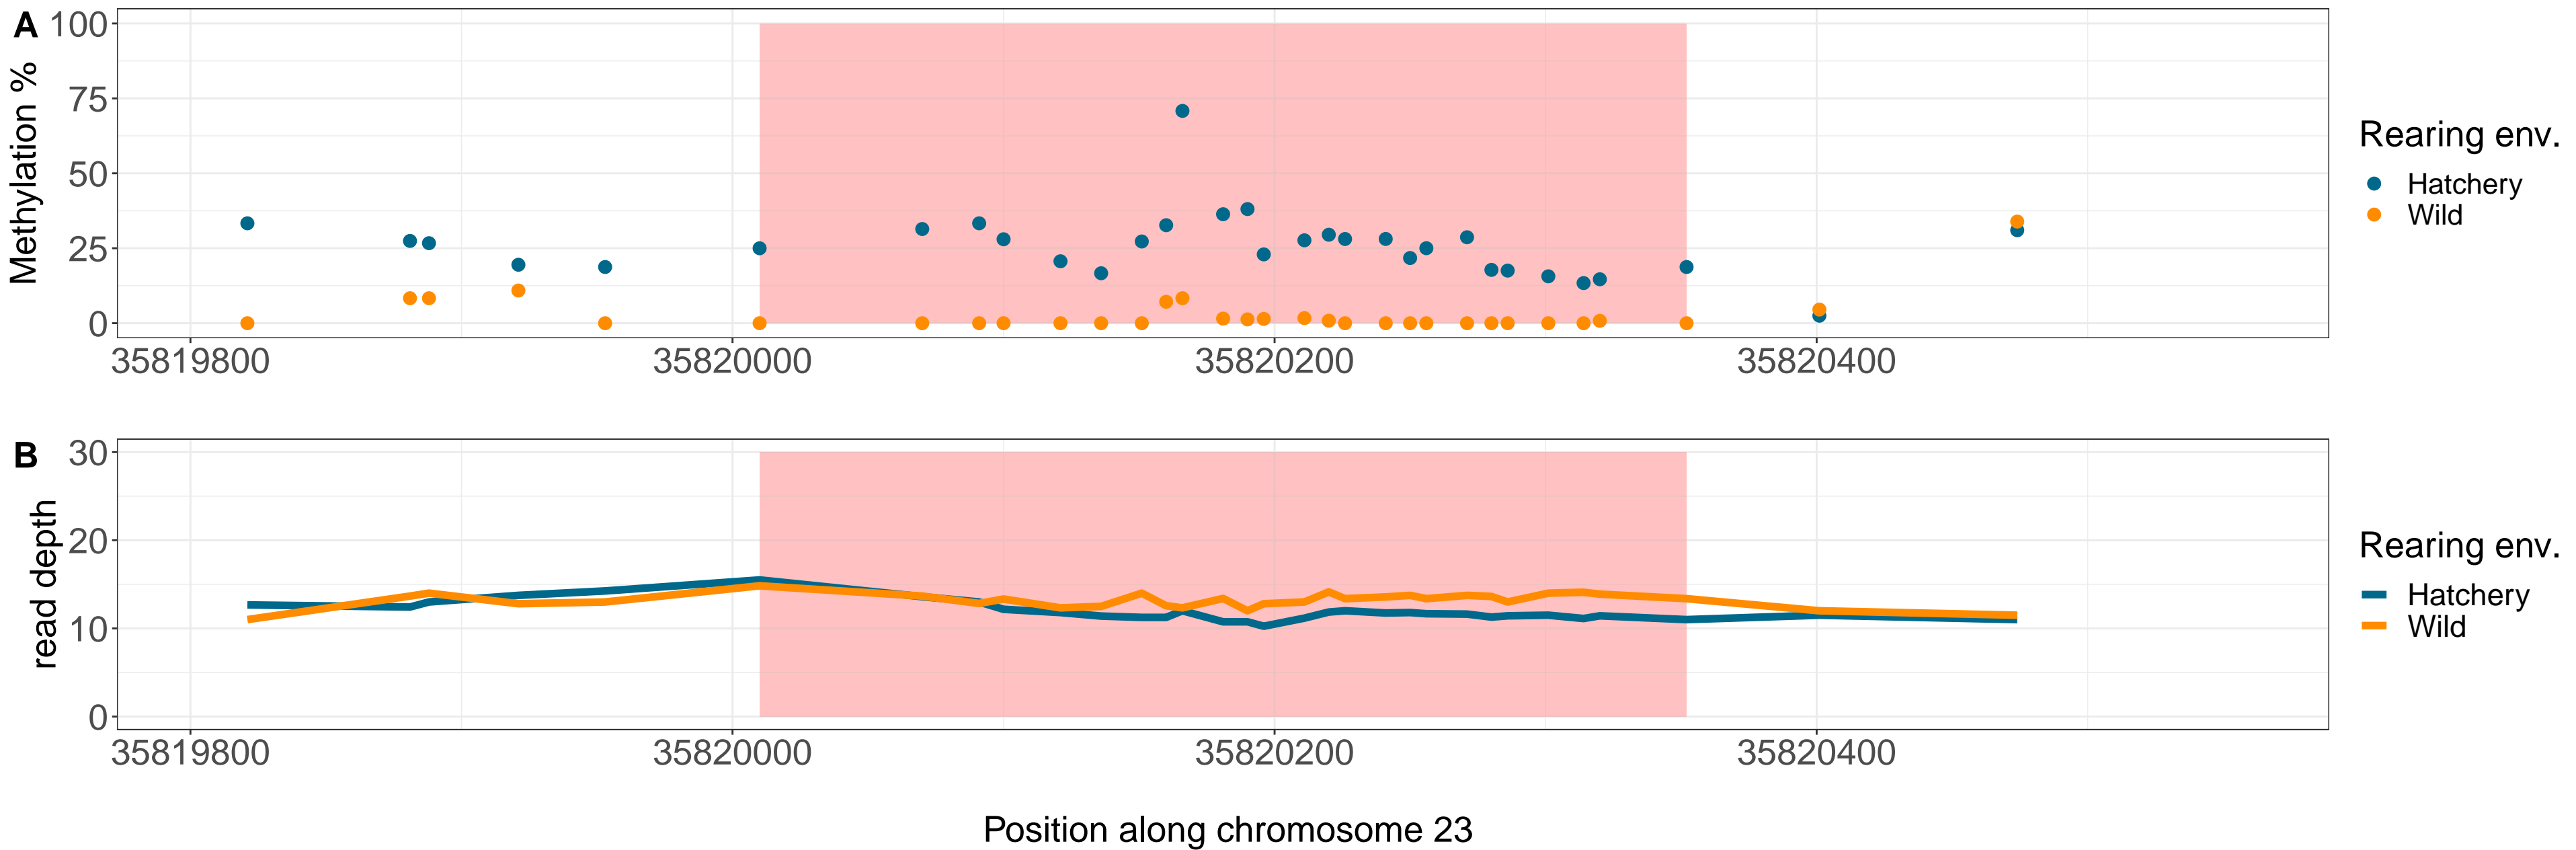



# DMR\_33

XM\_020464237.1

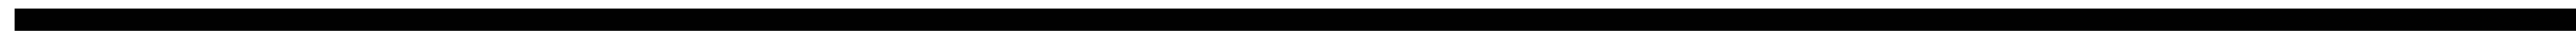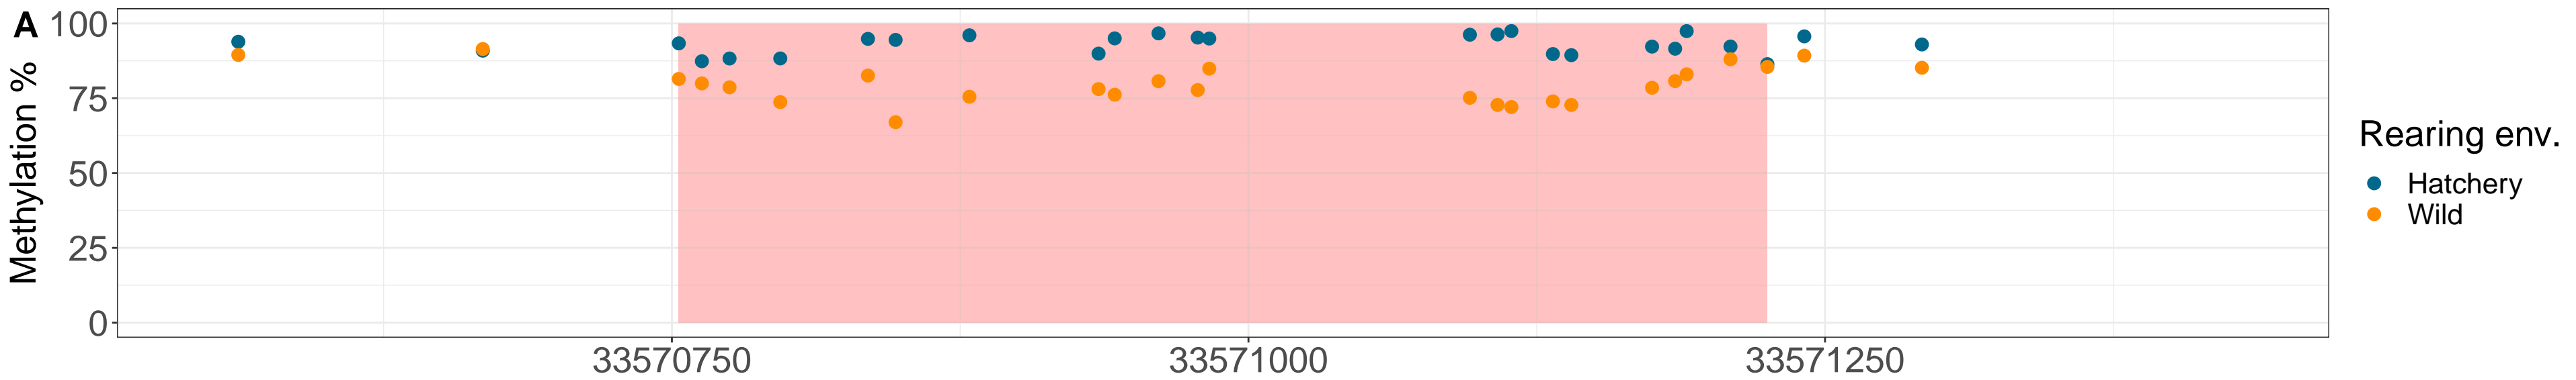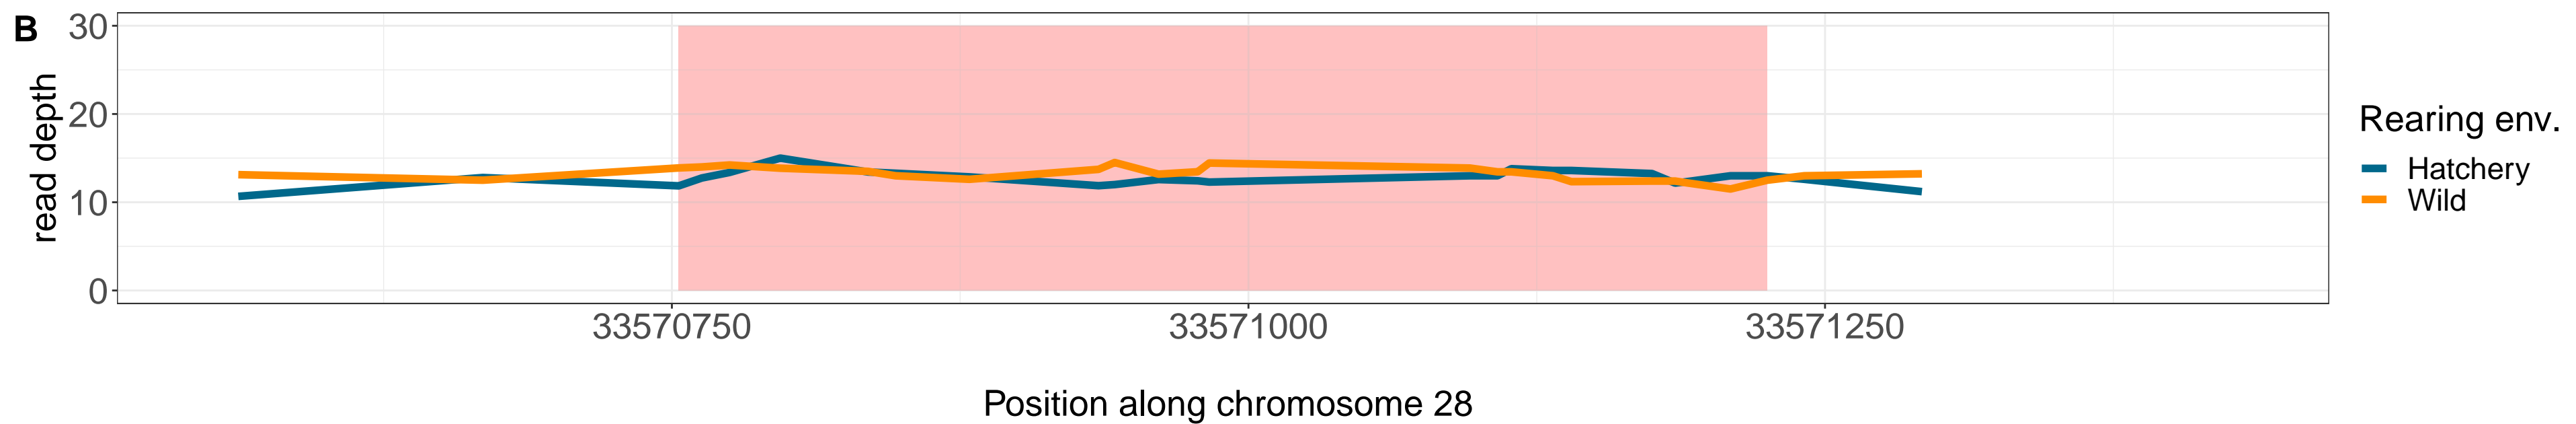

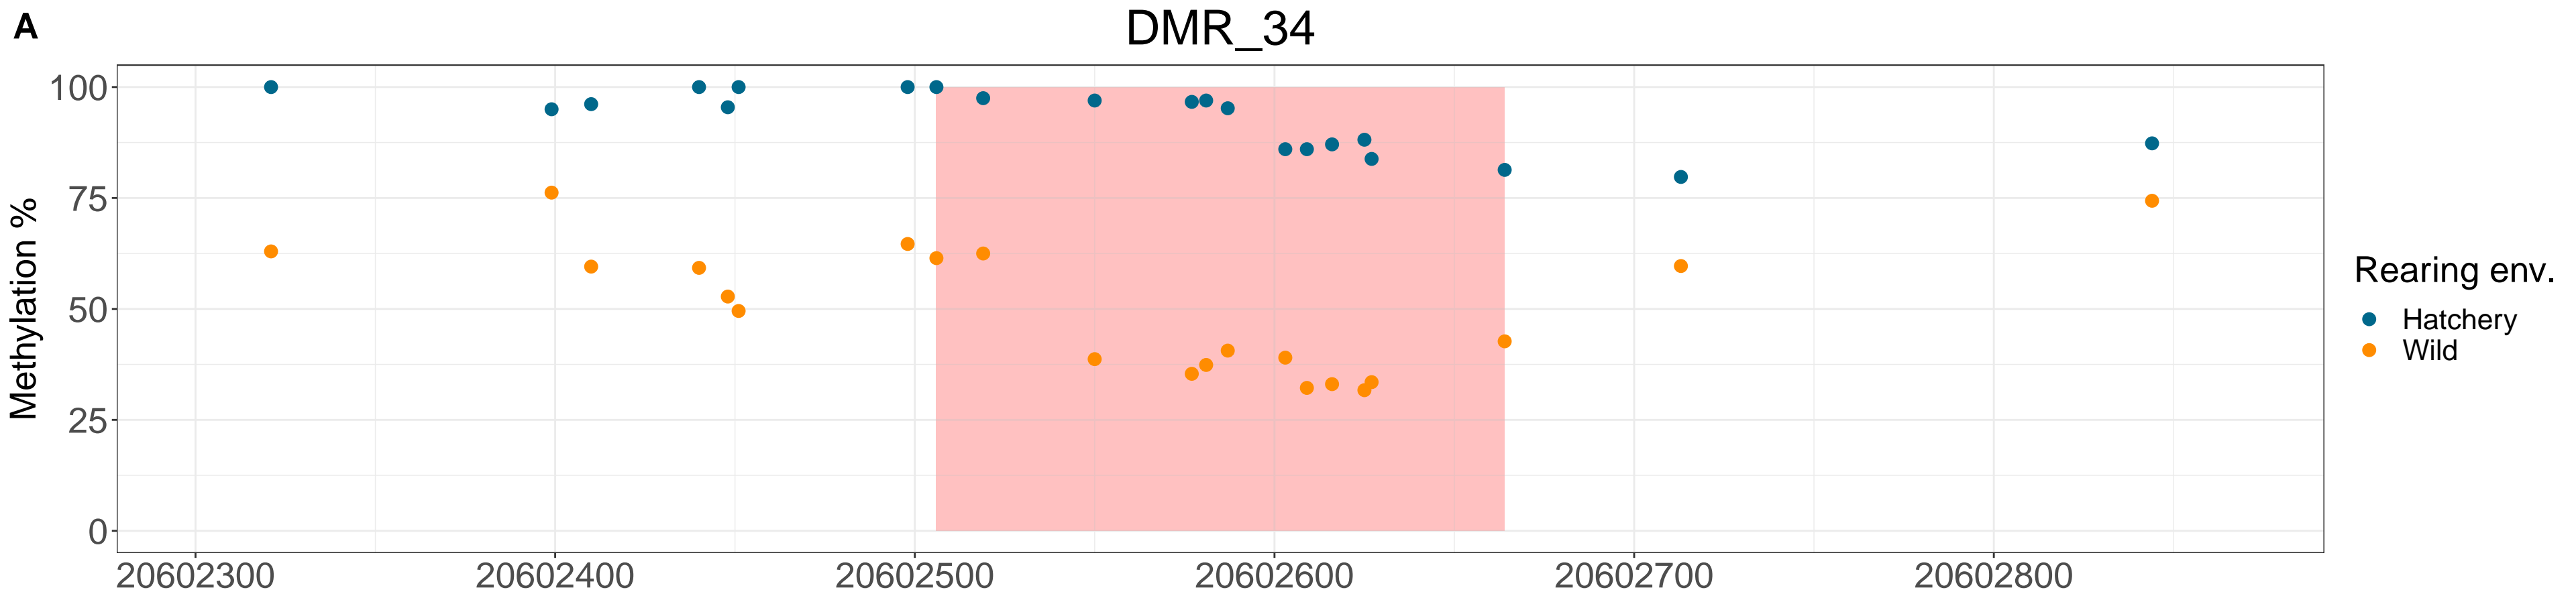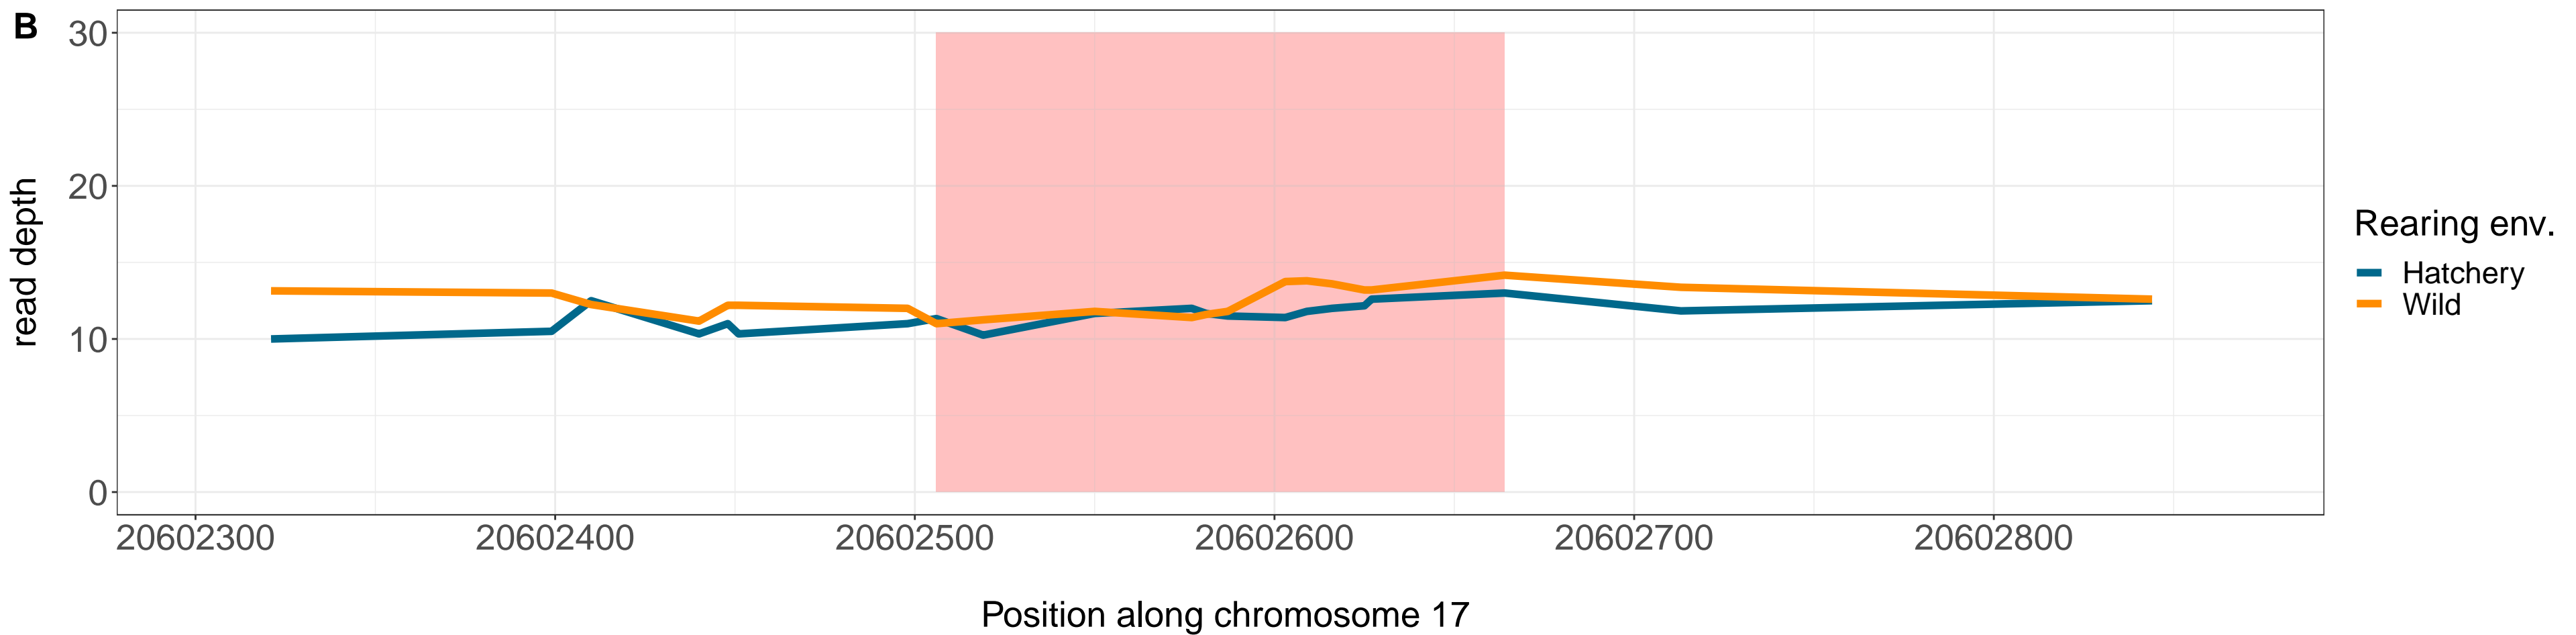

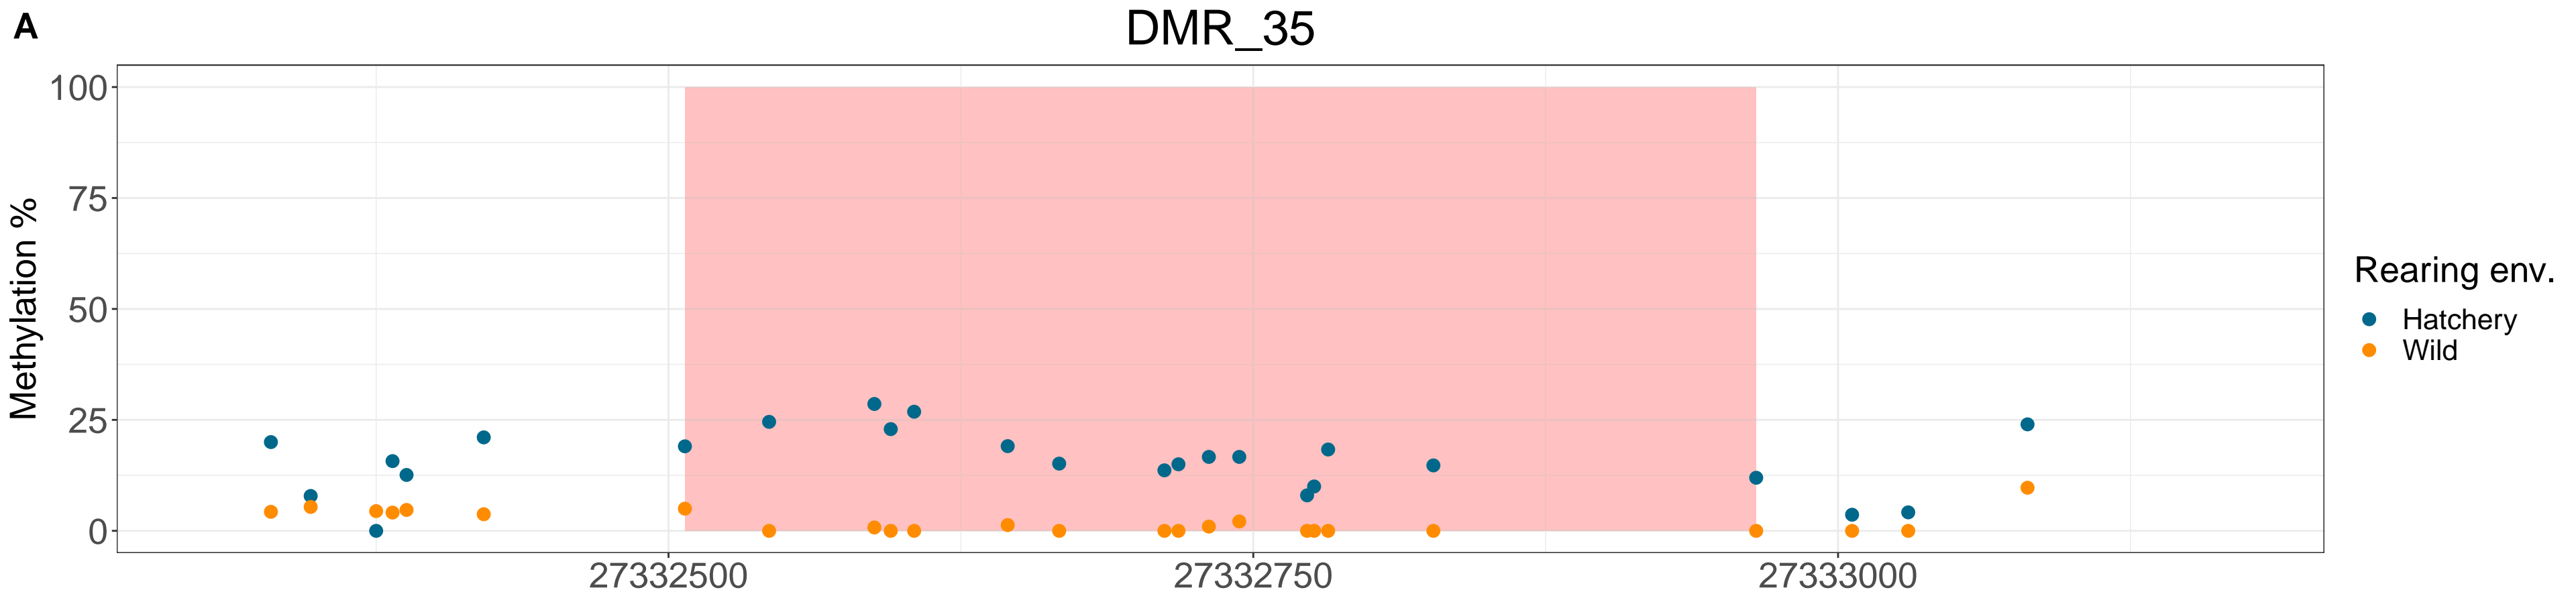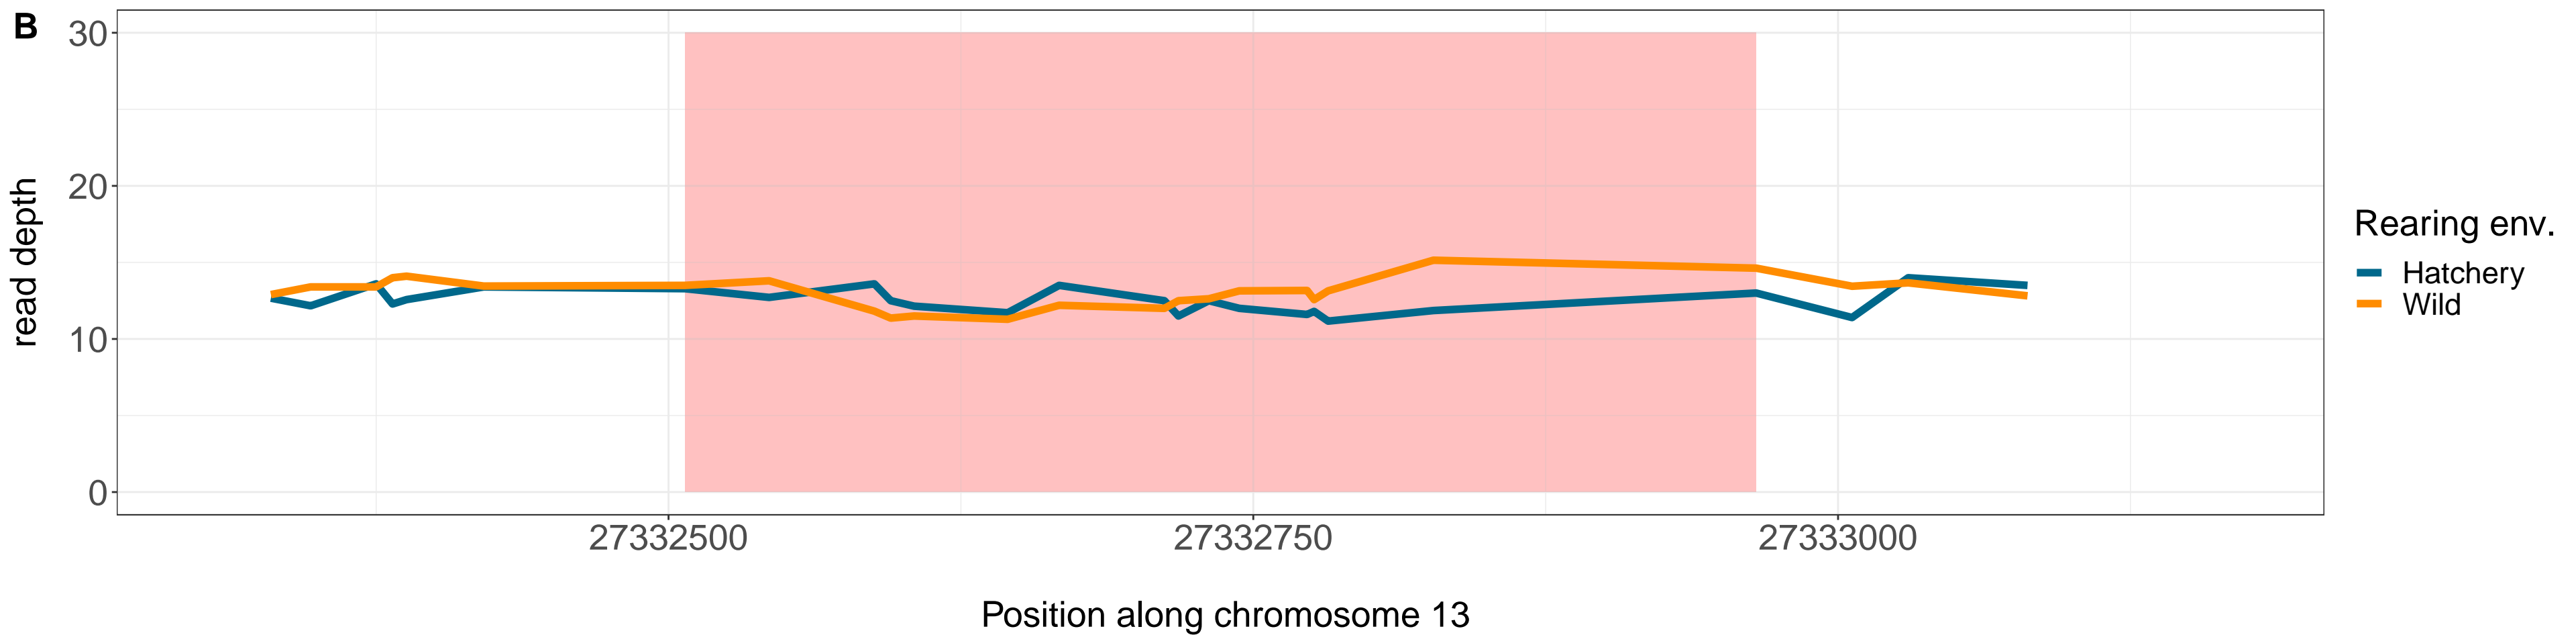

# DMR\_36

XM\_020477866.1

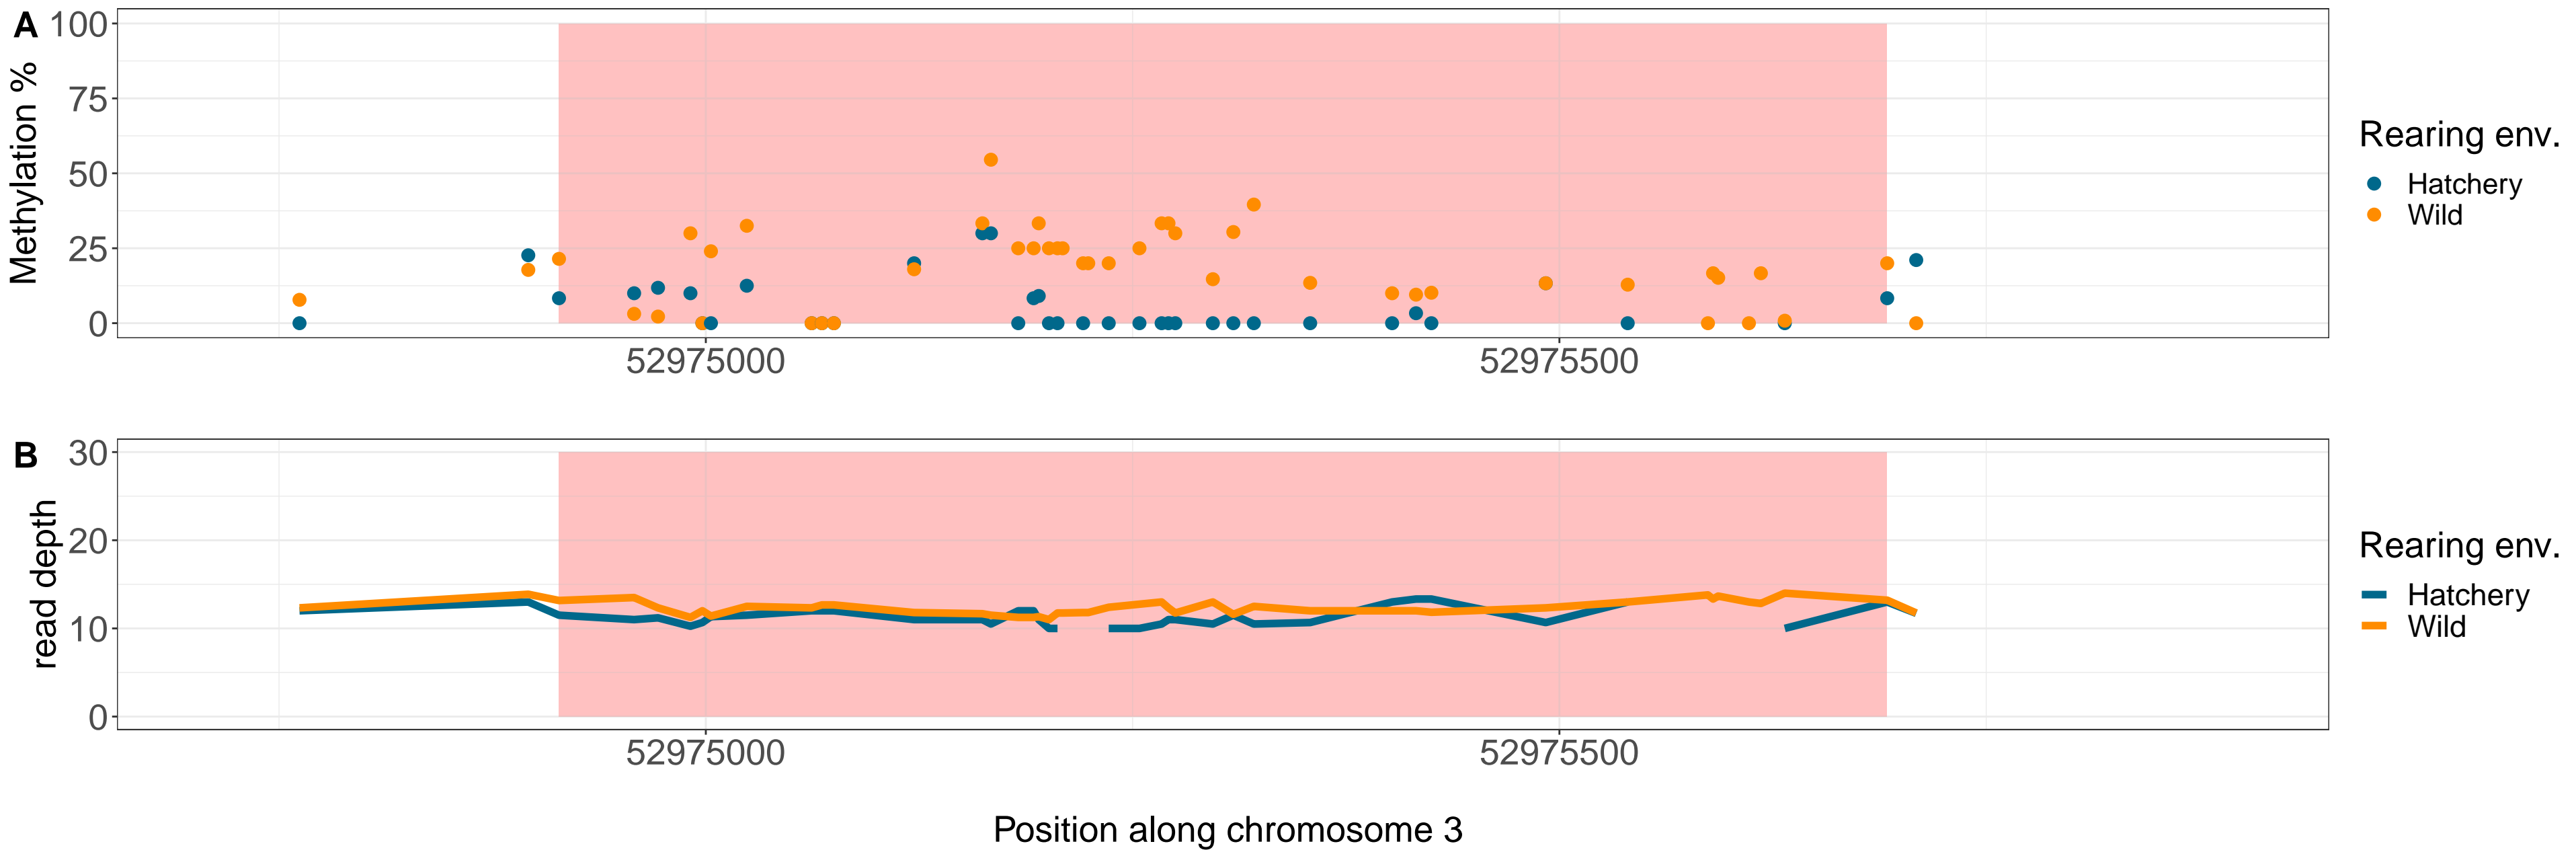

**A**

DMR\_37

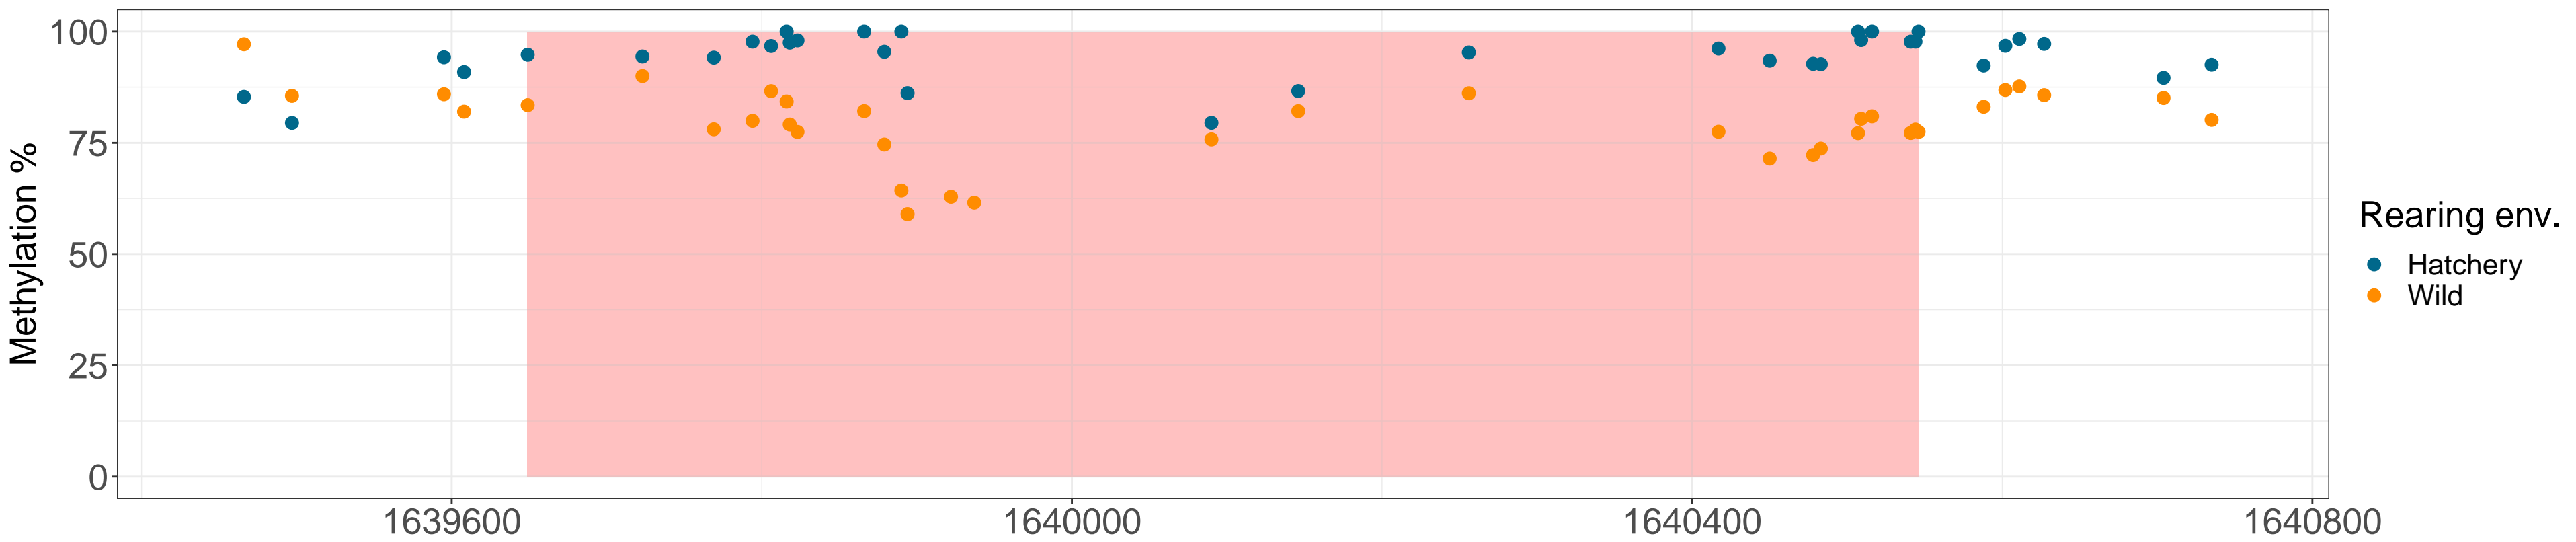**B**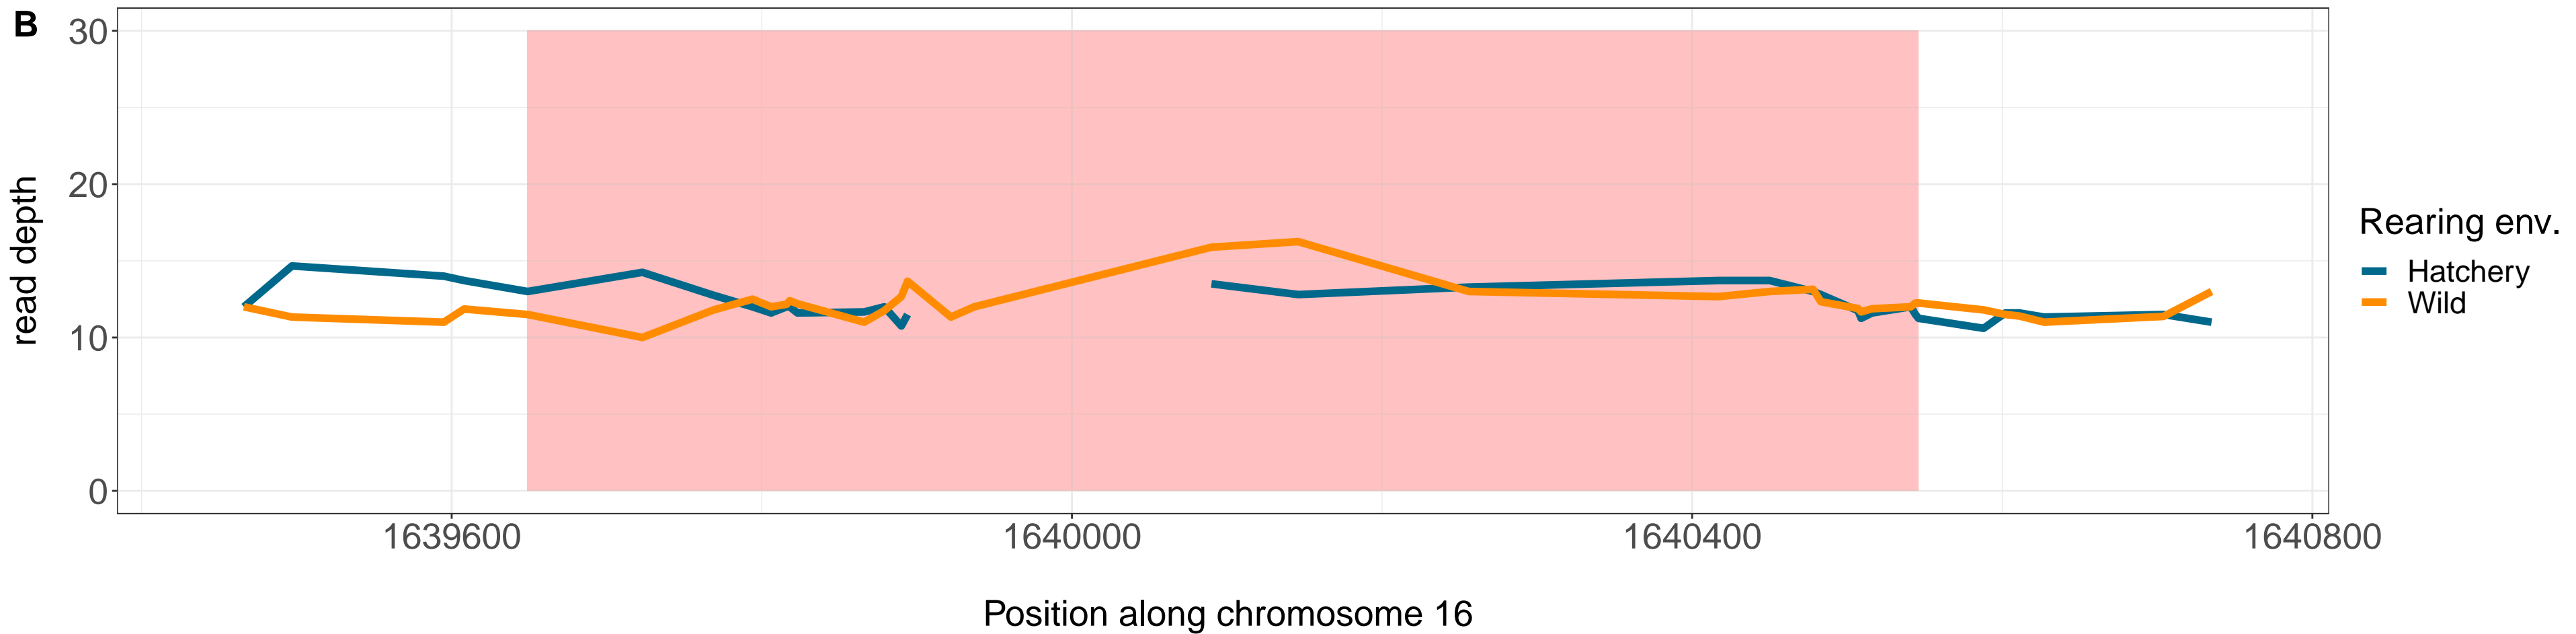

# DMR\_38

XM\_020463485.1

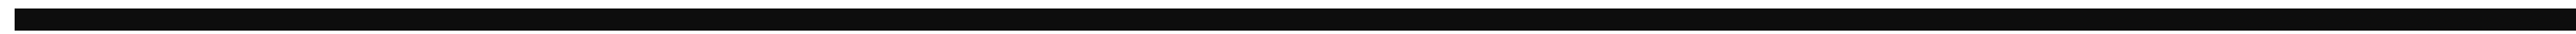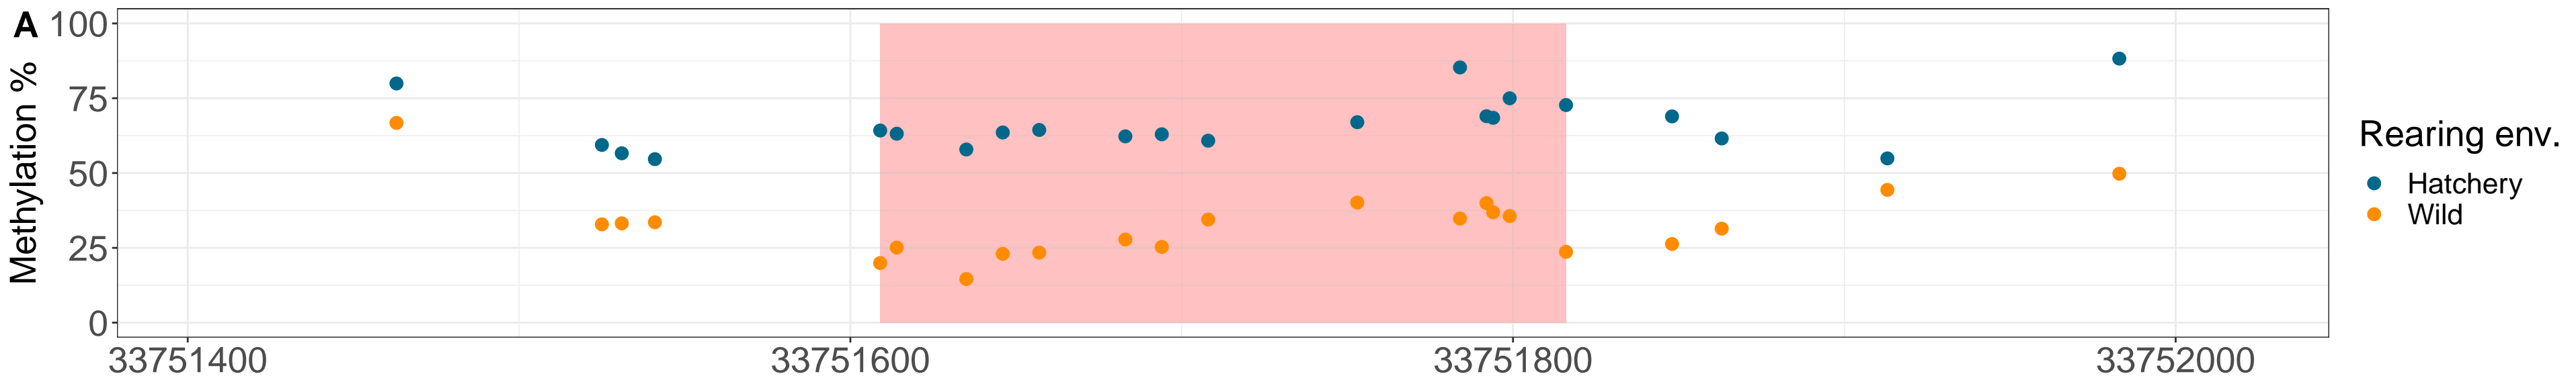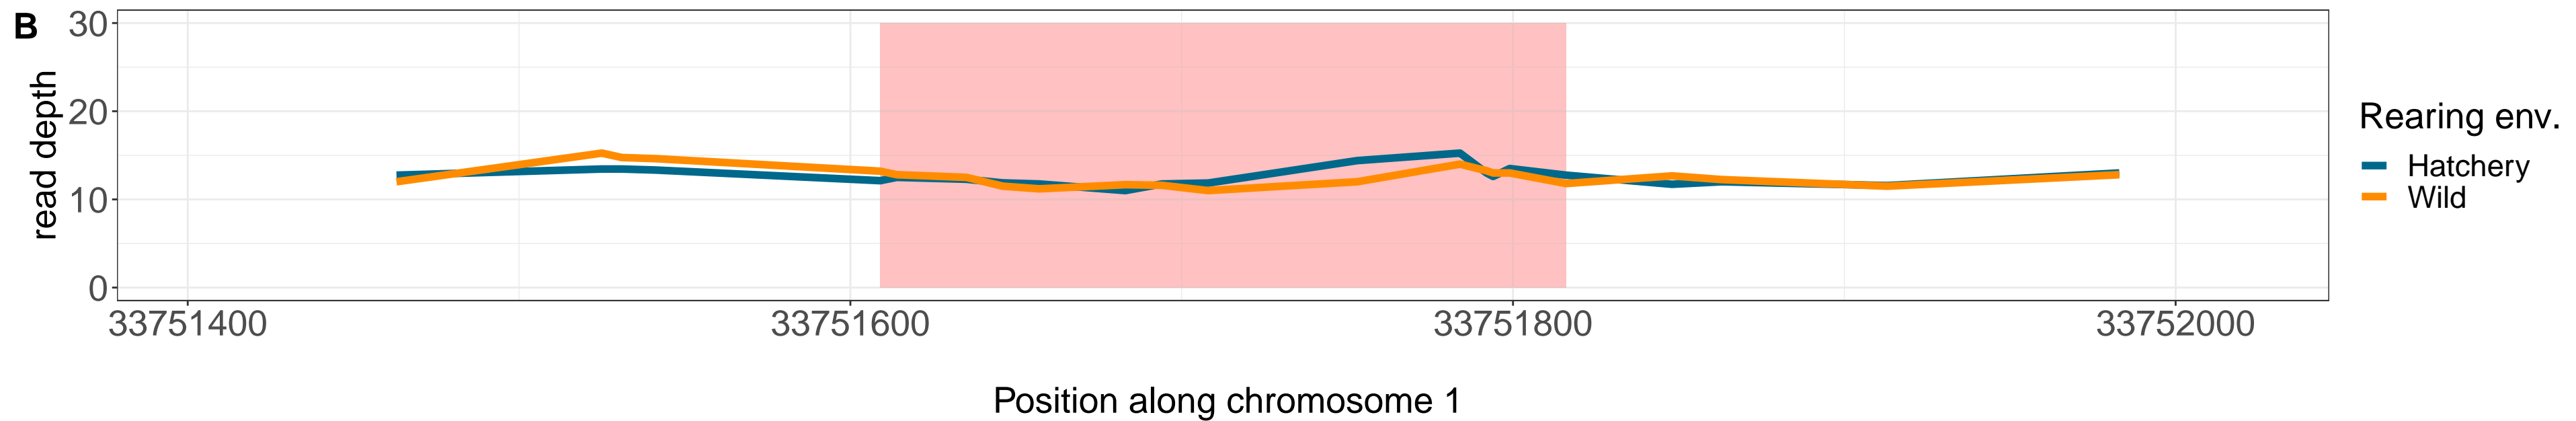

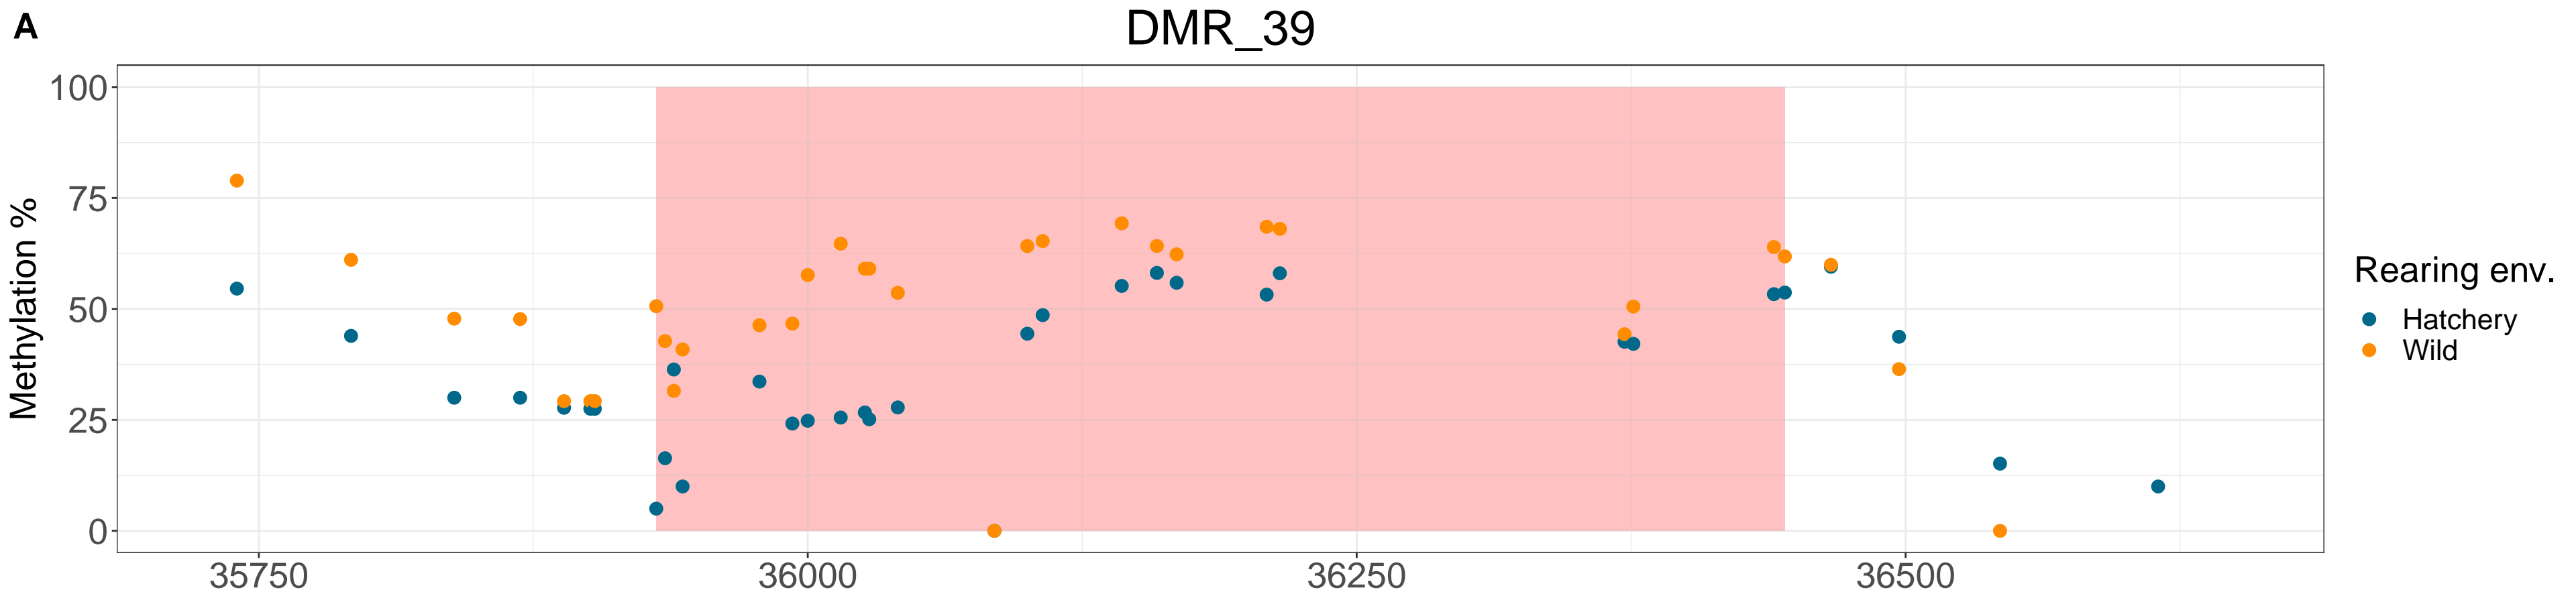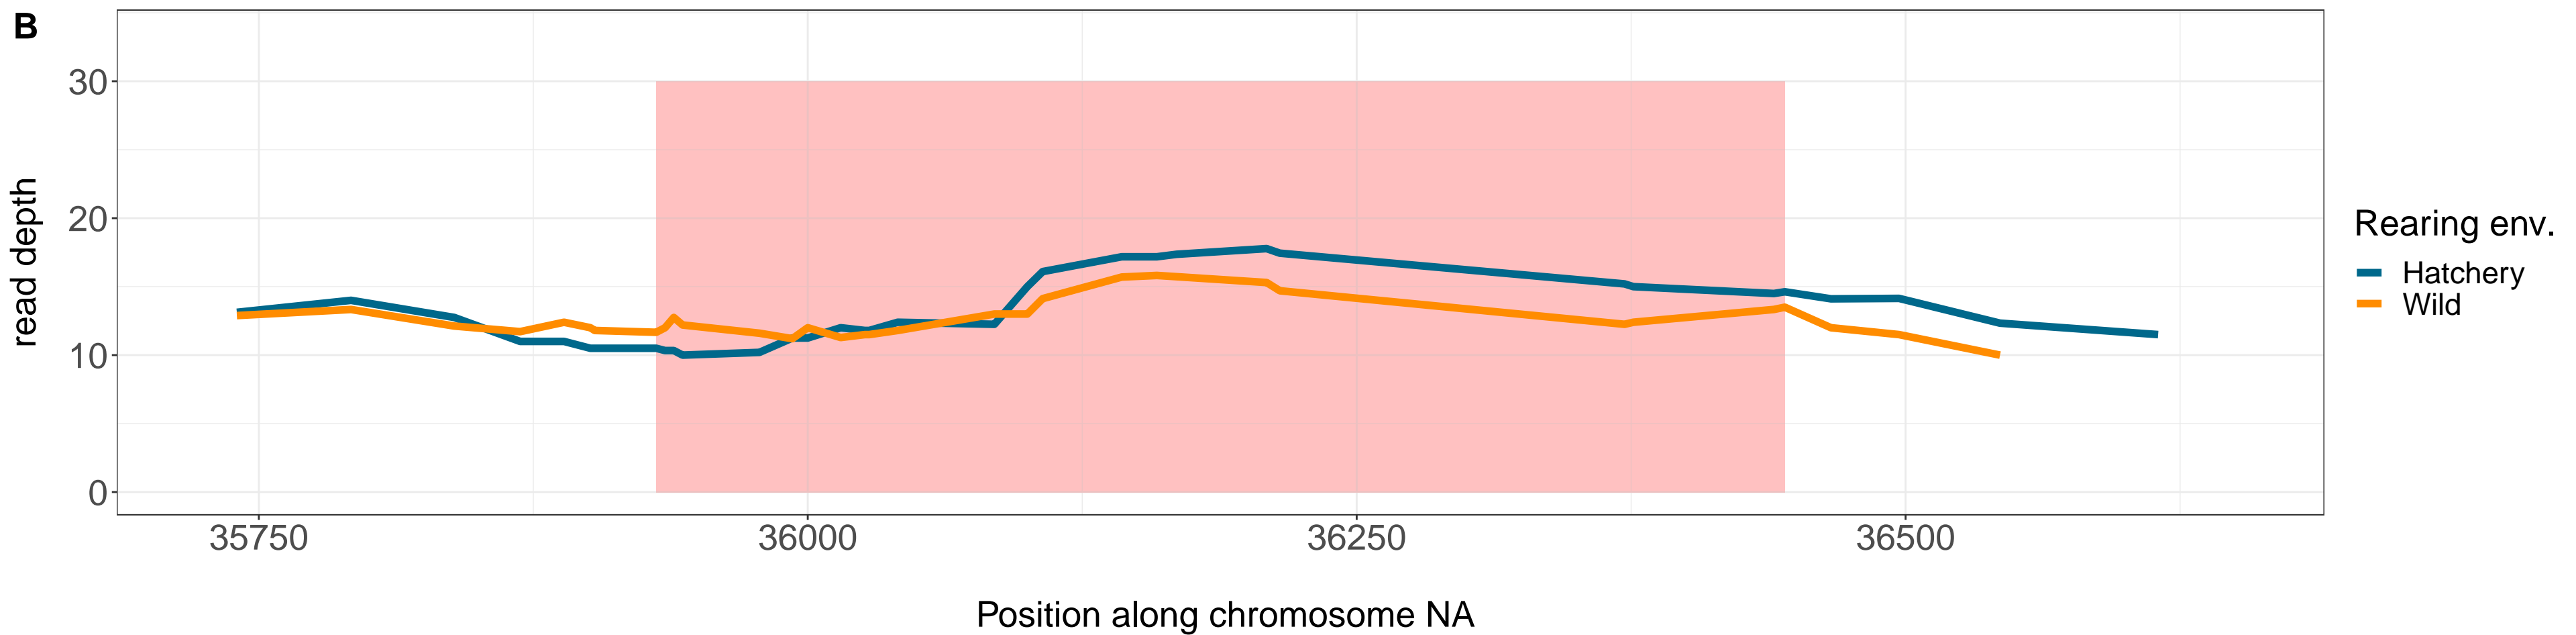

# DMR\_40

XM\_020483656.1

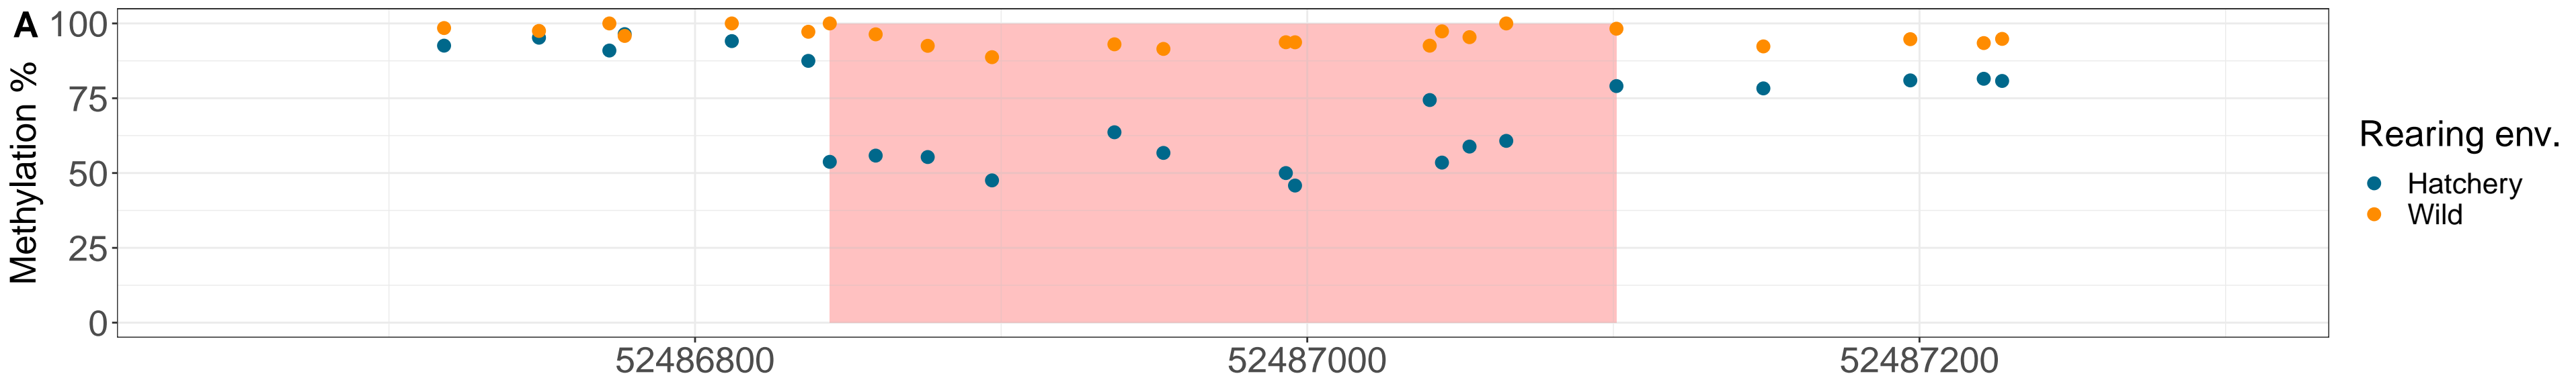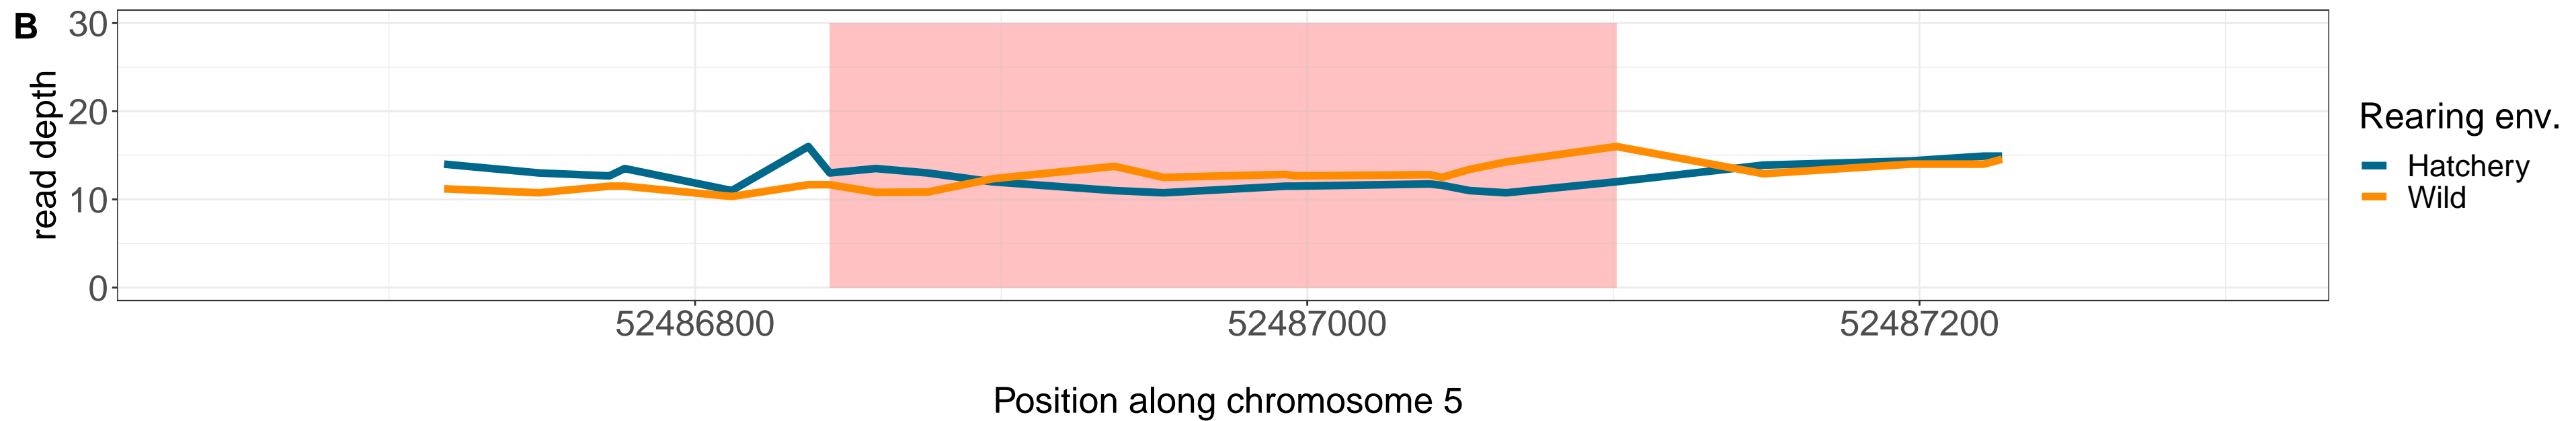



**A**

## DMR\_41

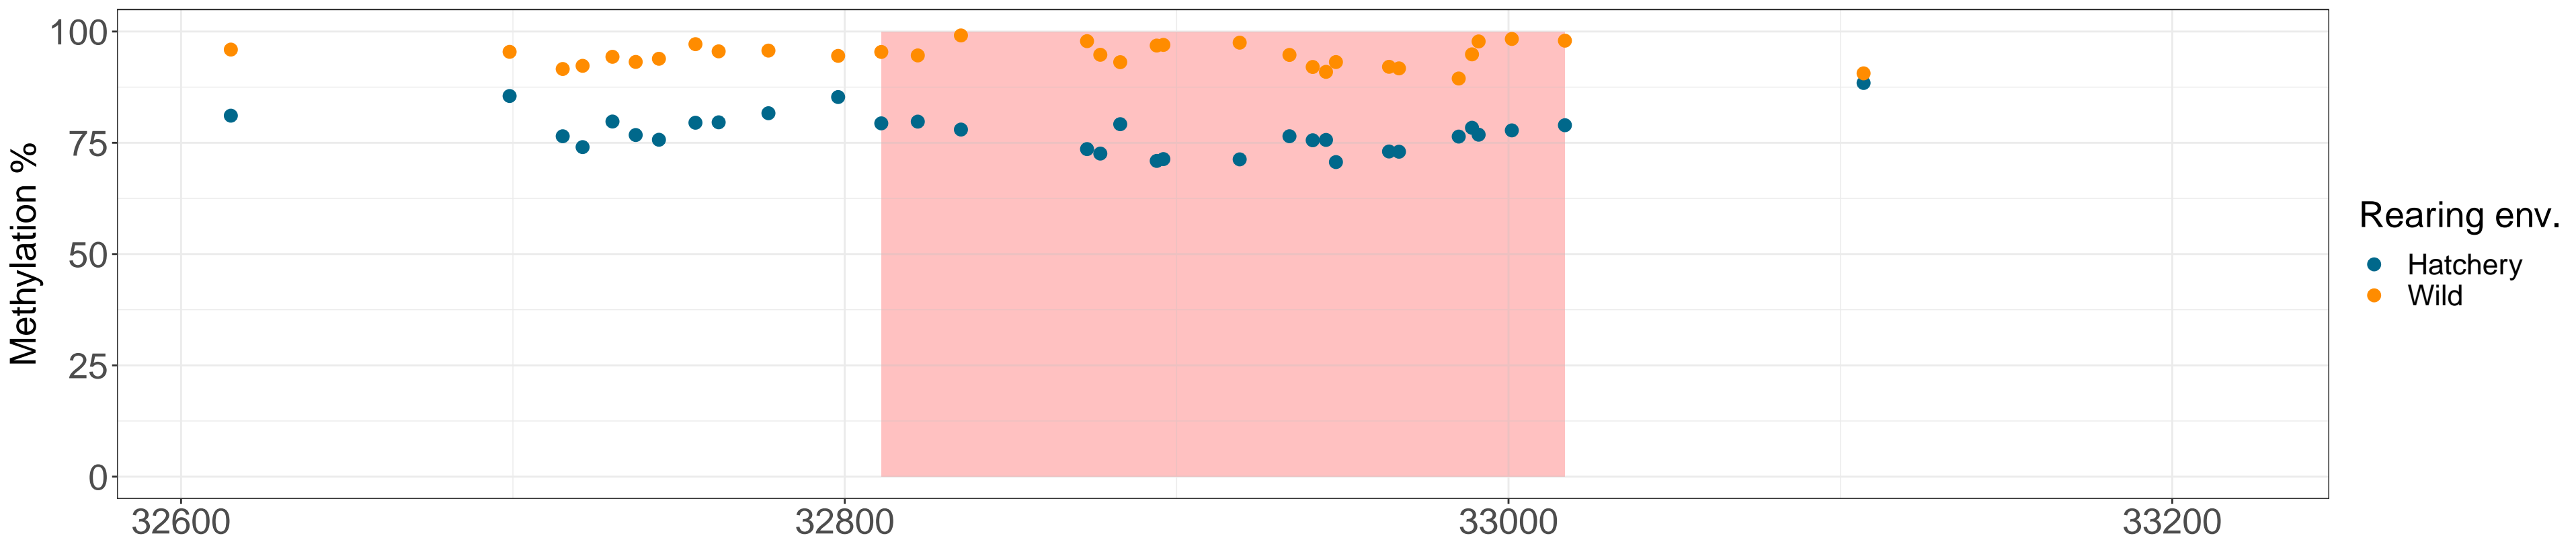**B**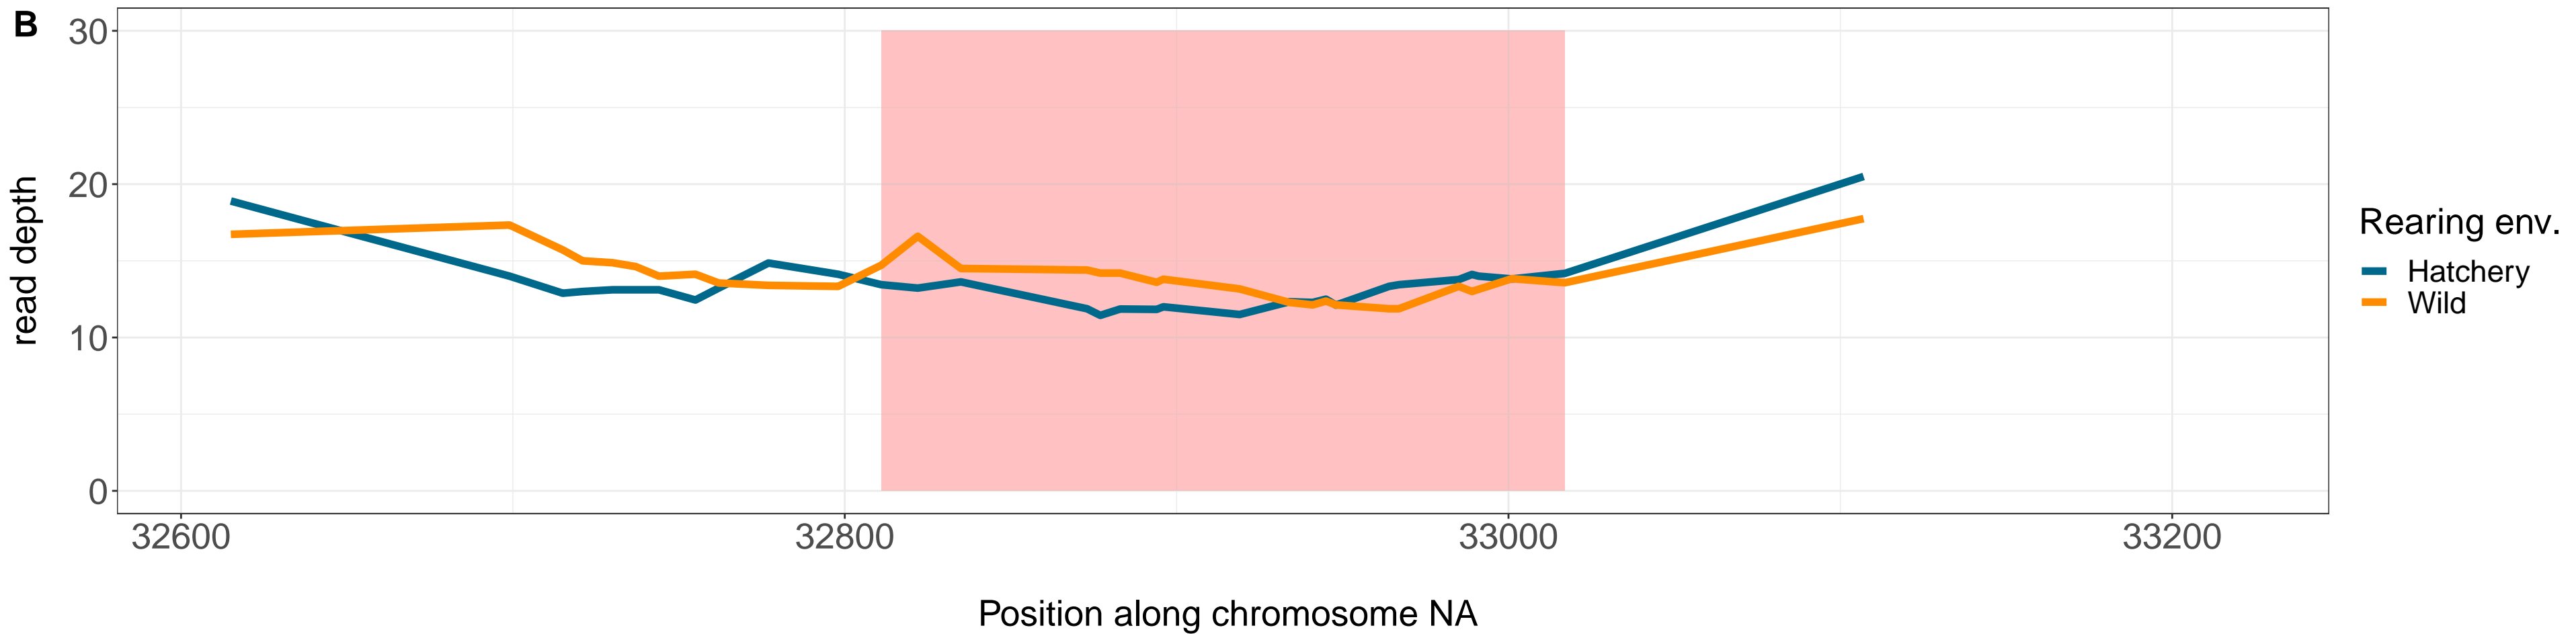

# DMR\_42

XM\_020480354.1

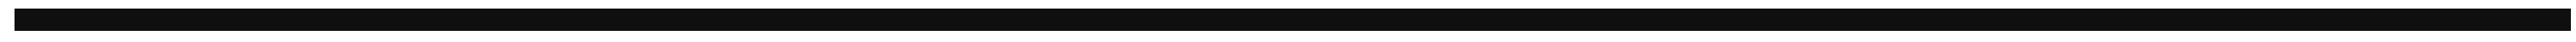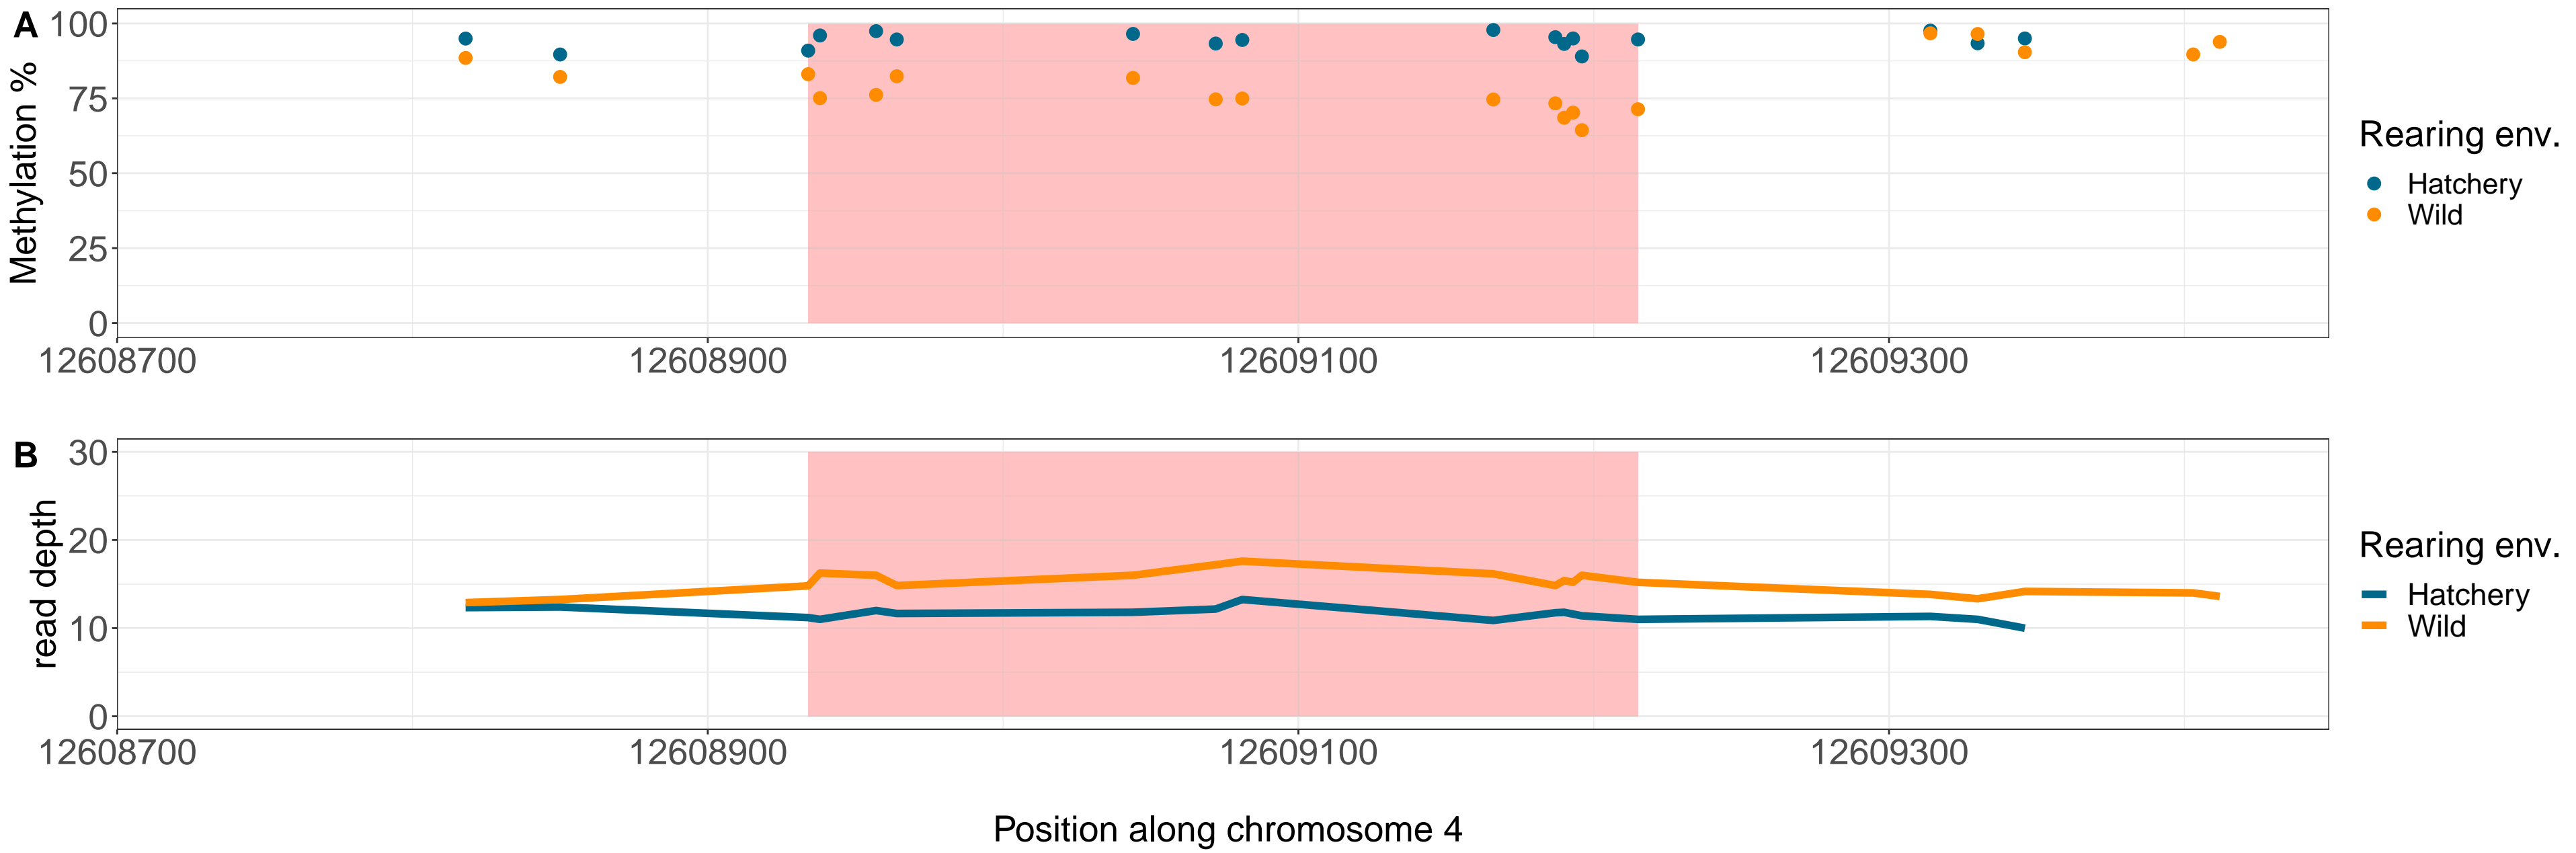

**A**

## DMR\_43

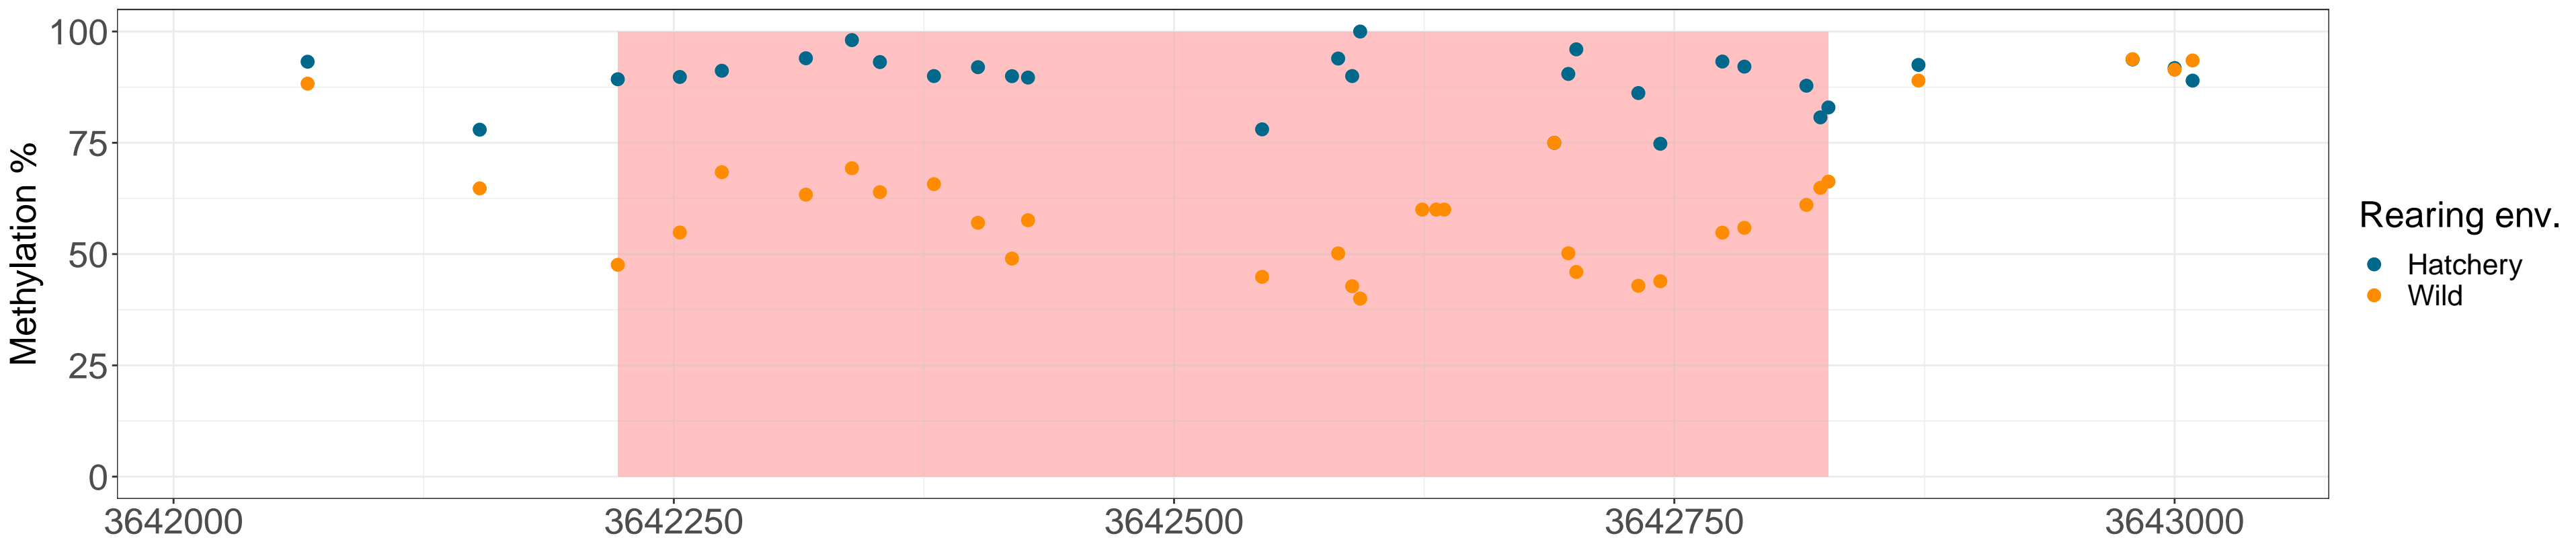**B**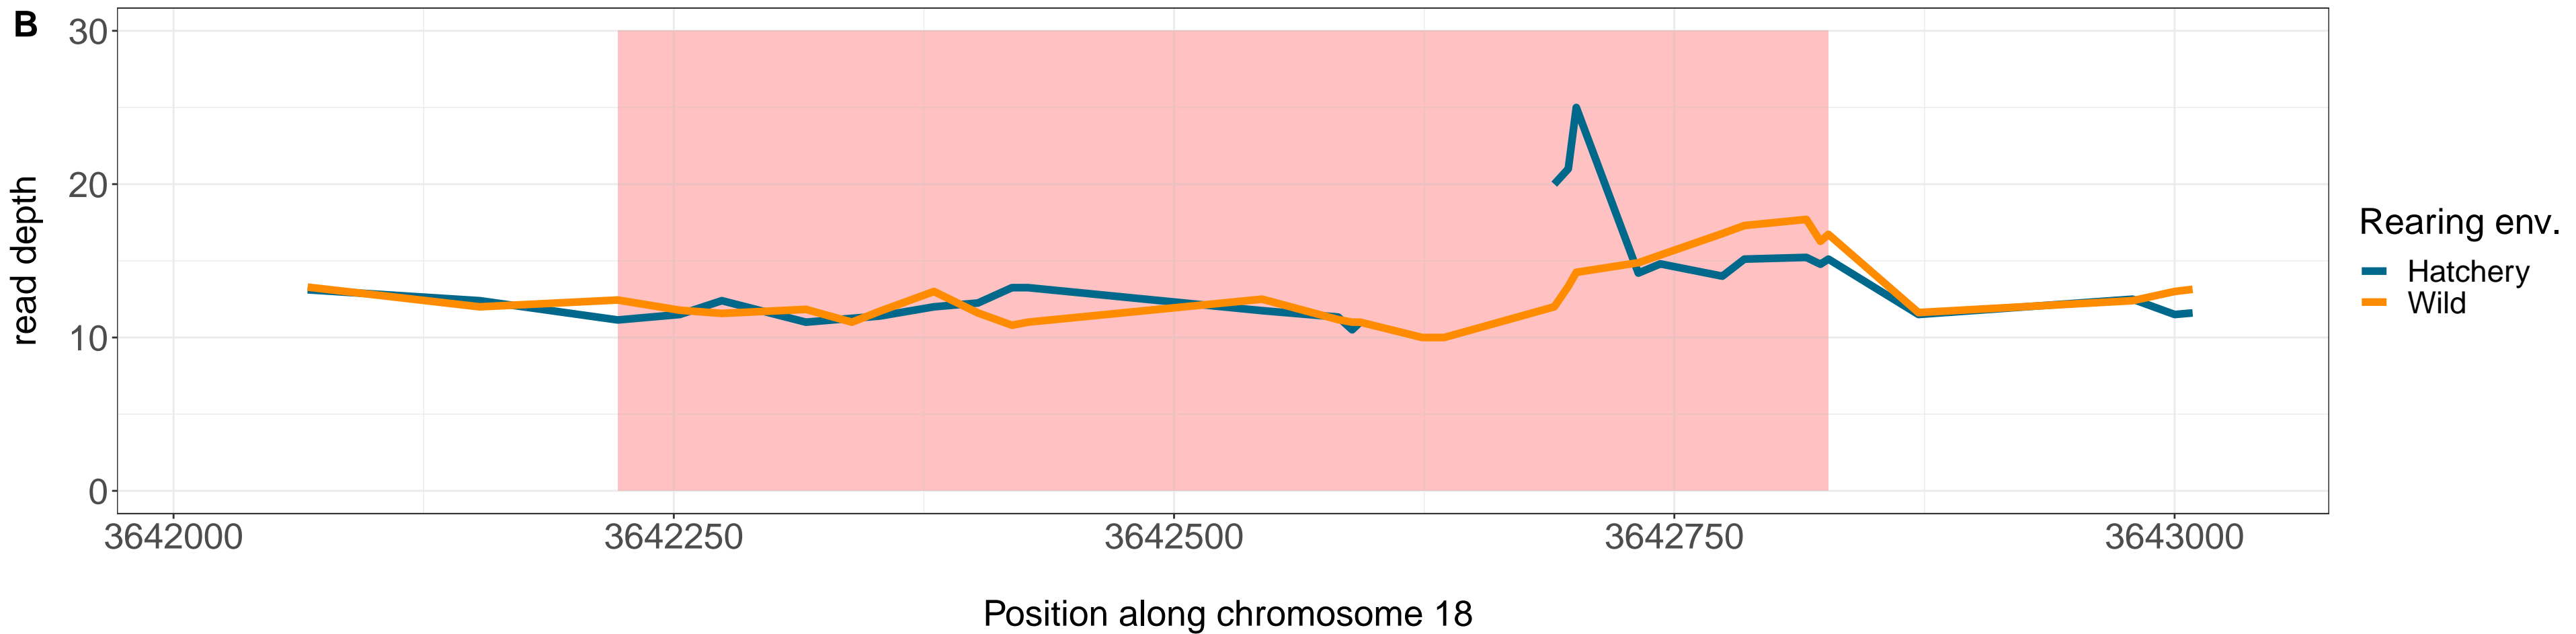

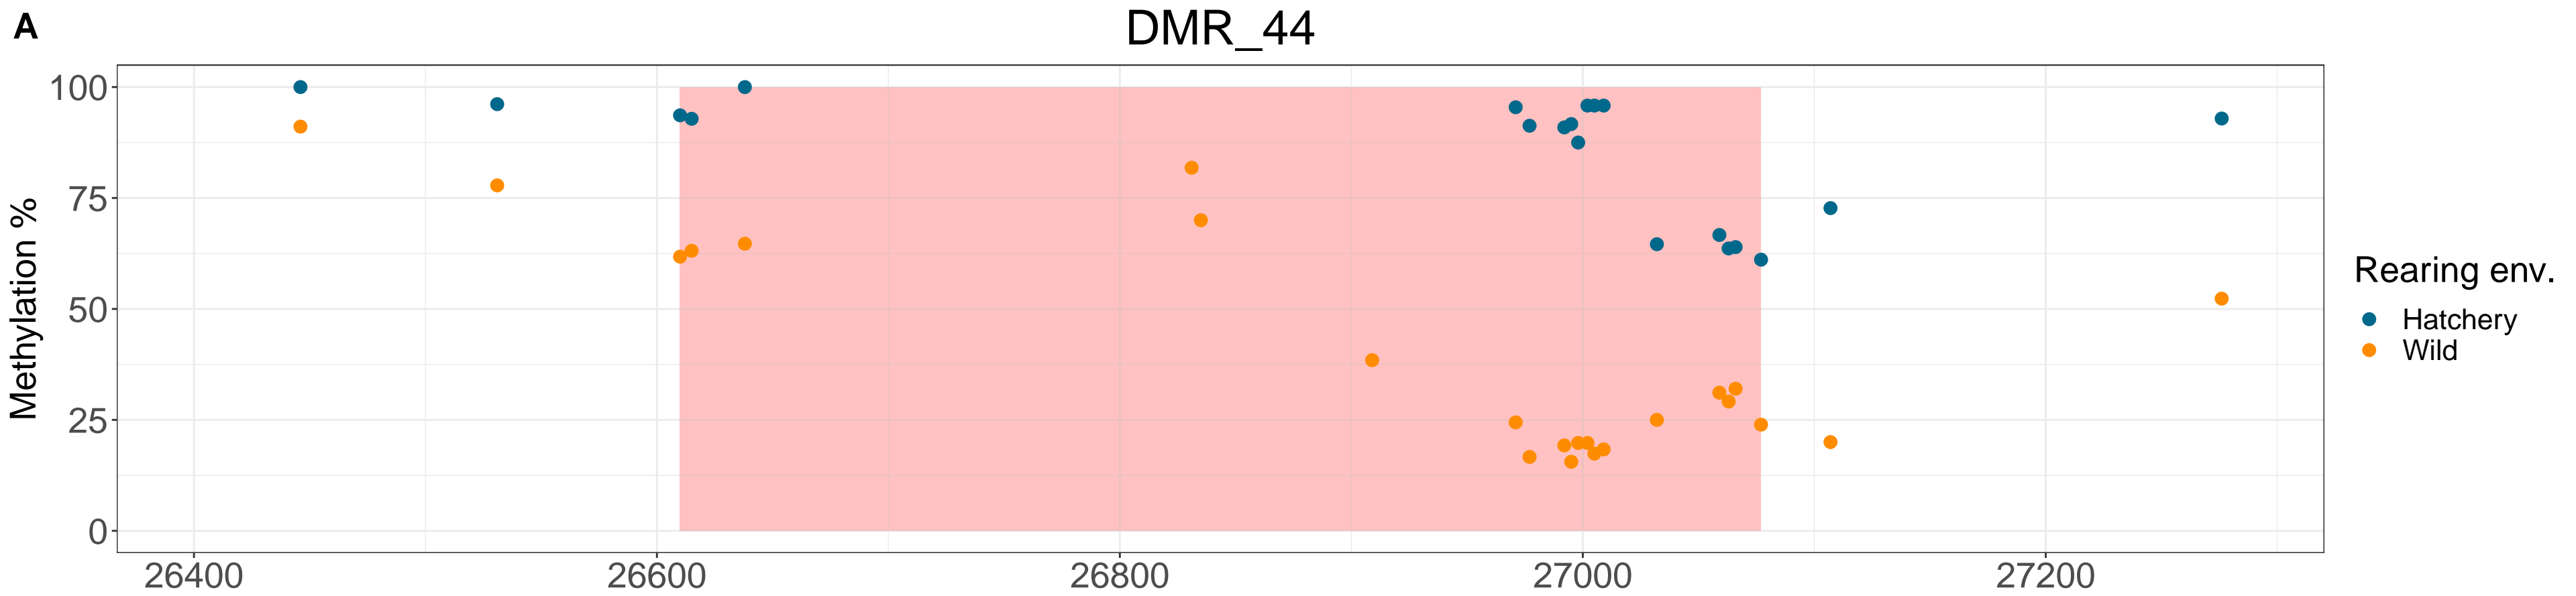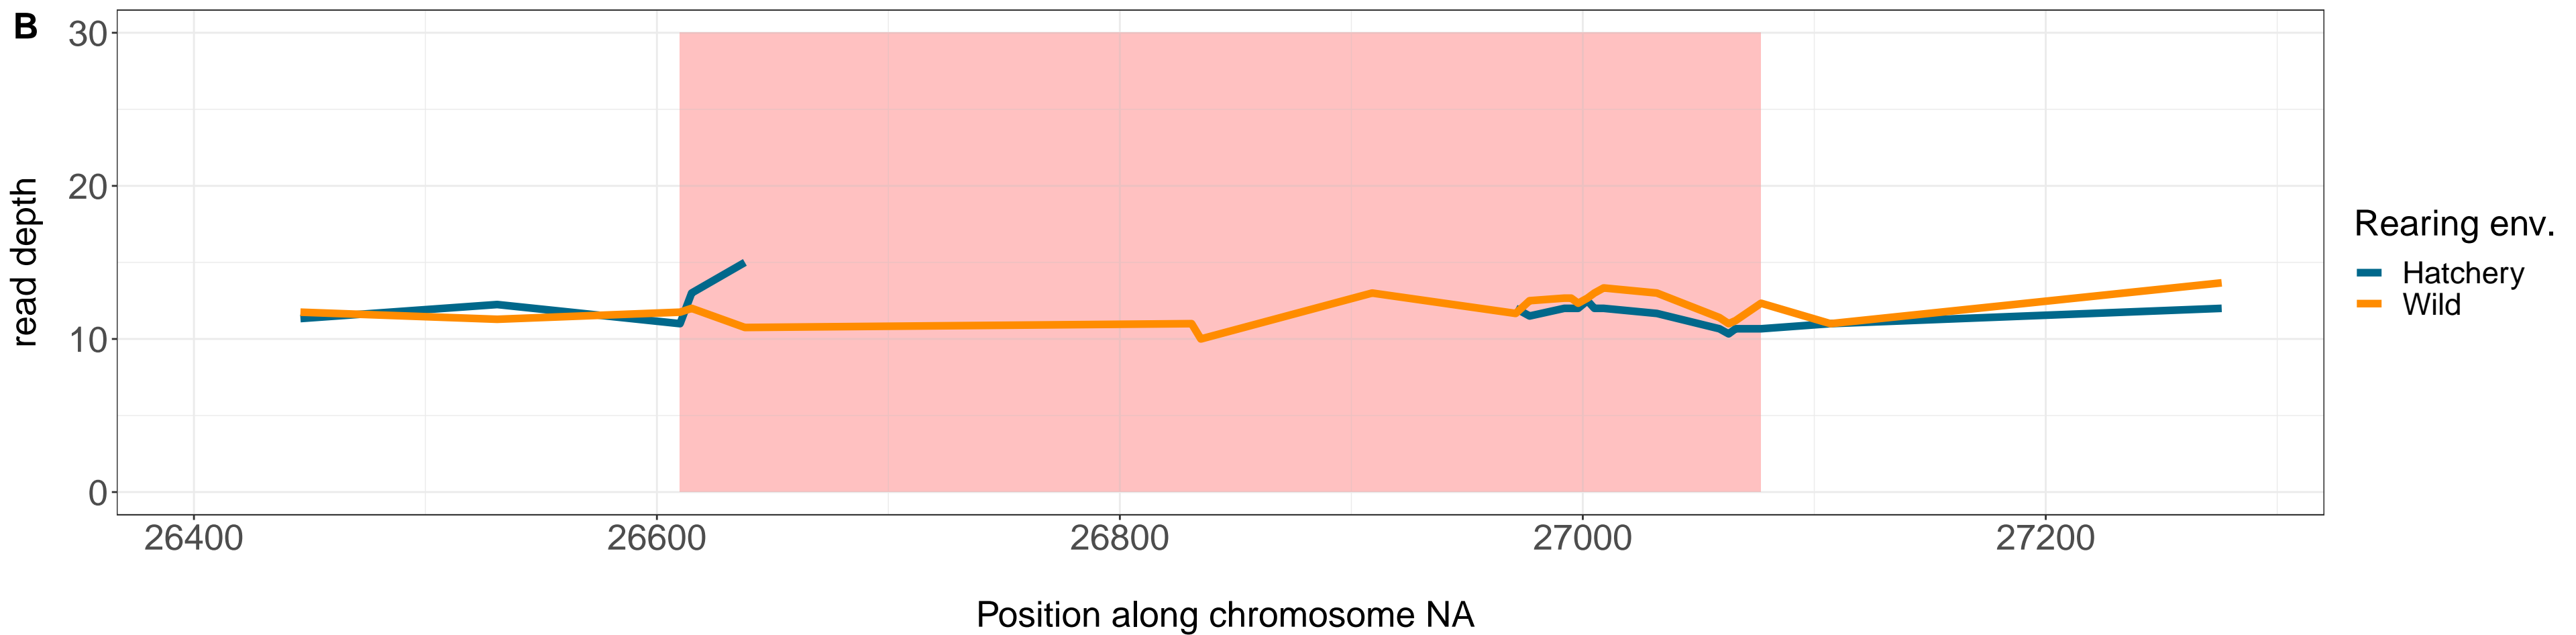

**A**

## DMR\_45

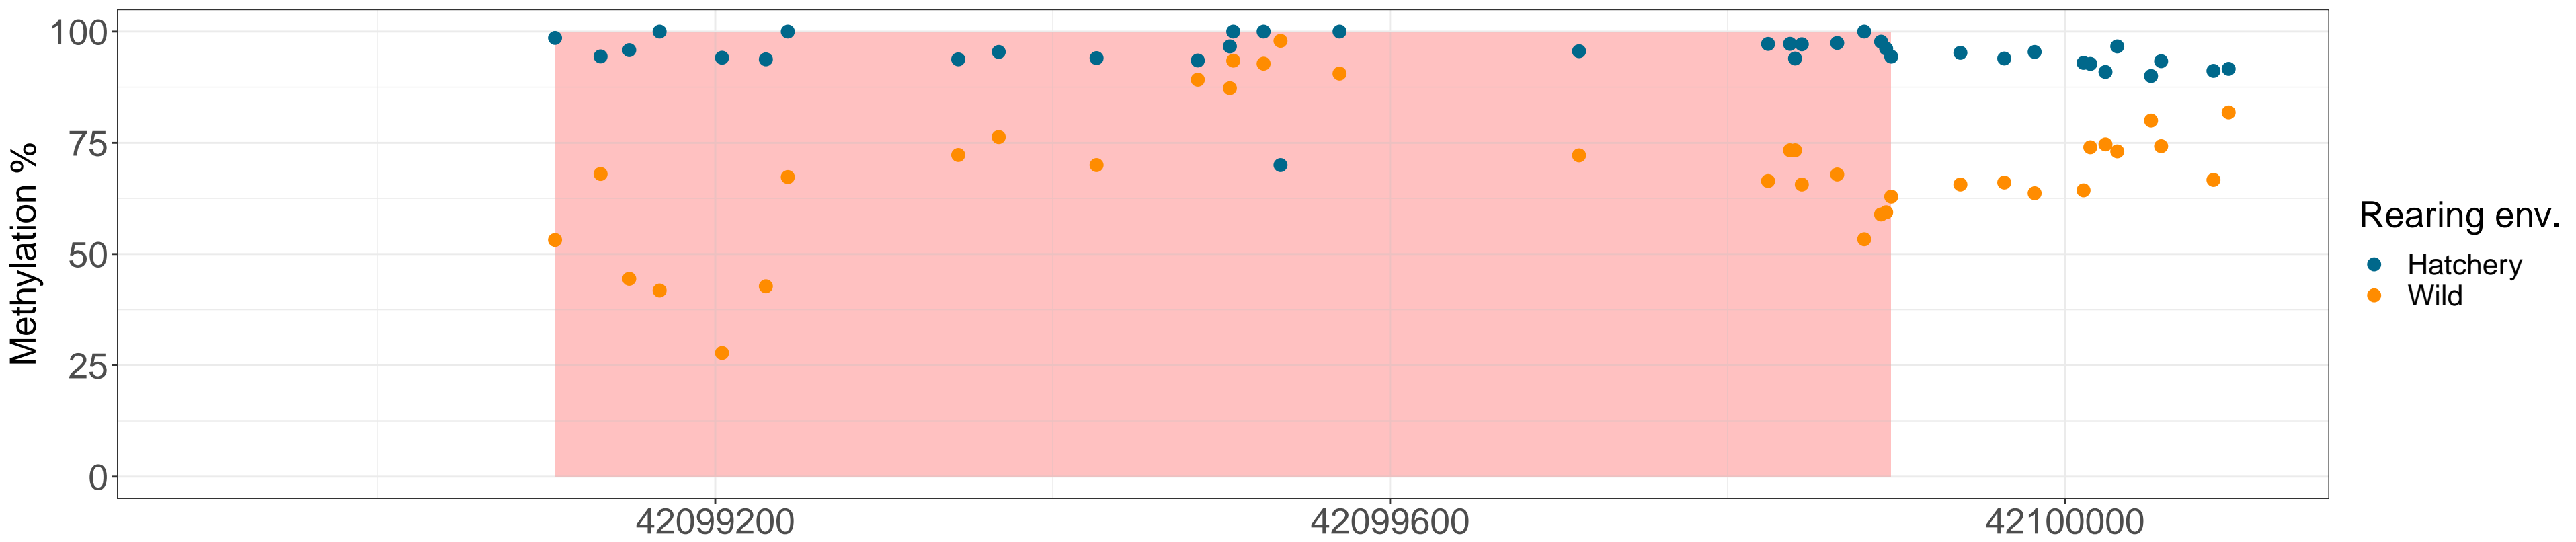**B**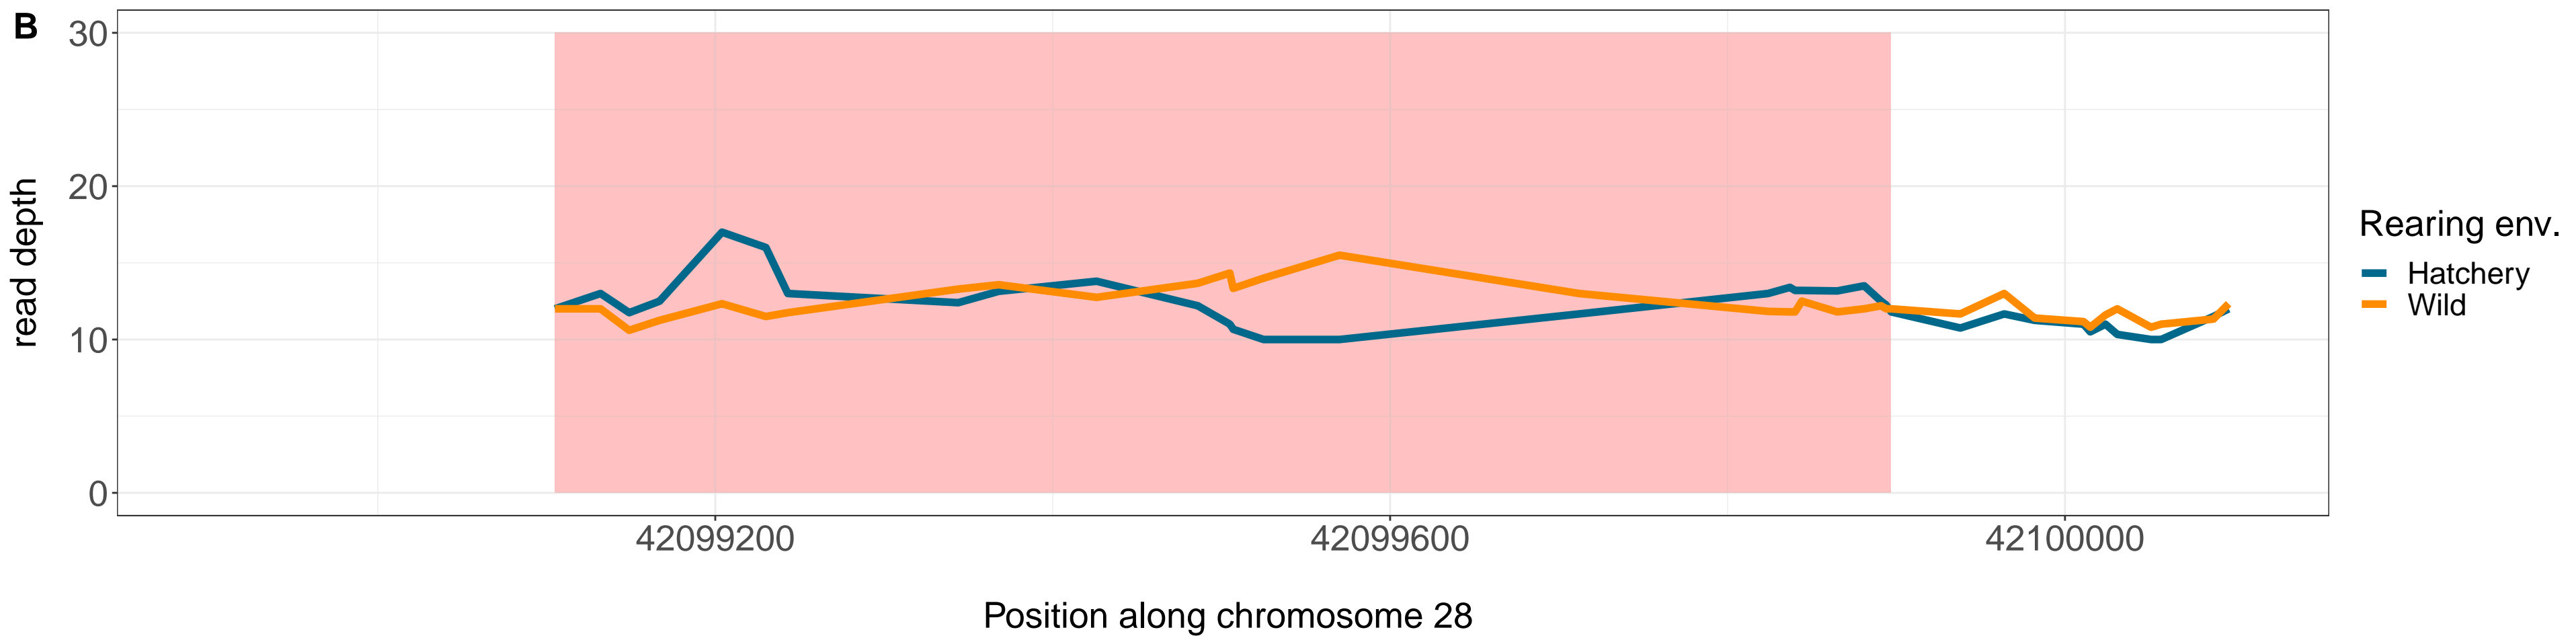

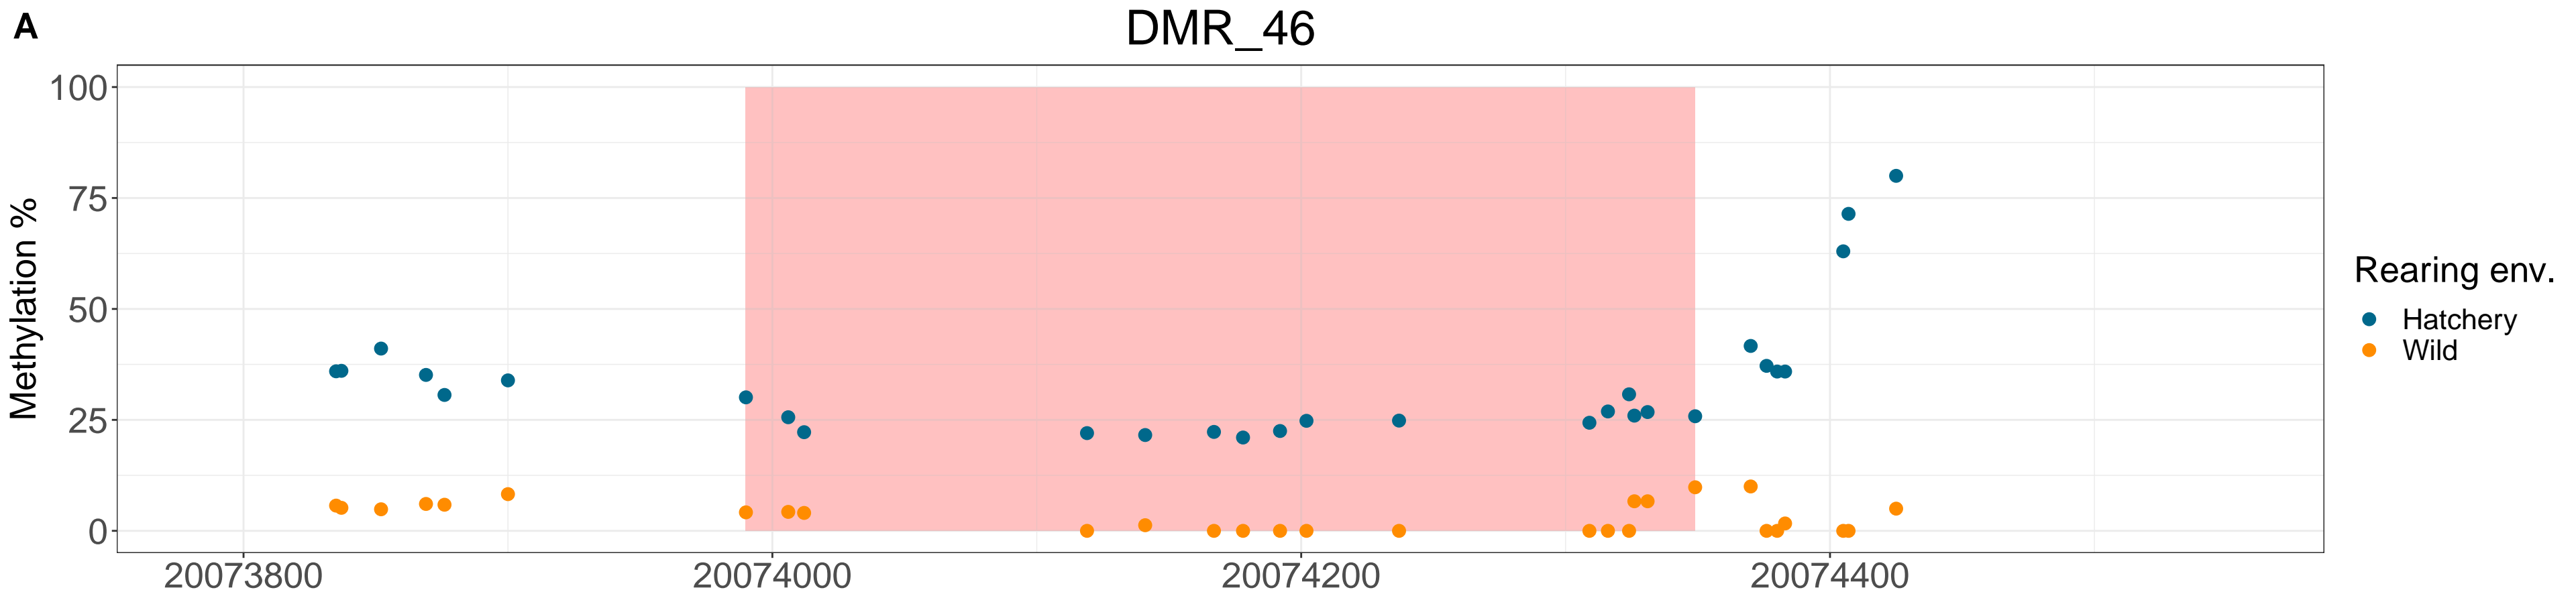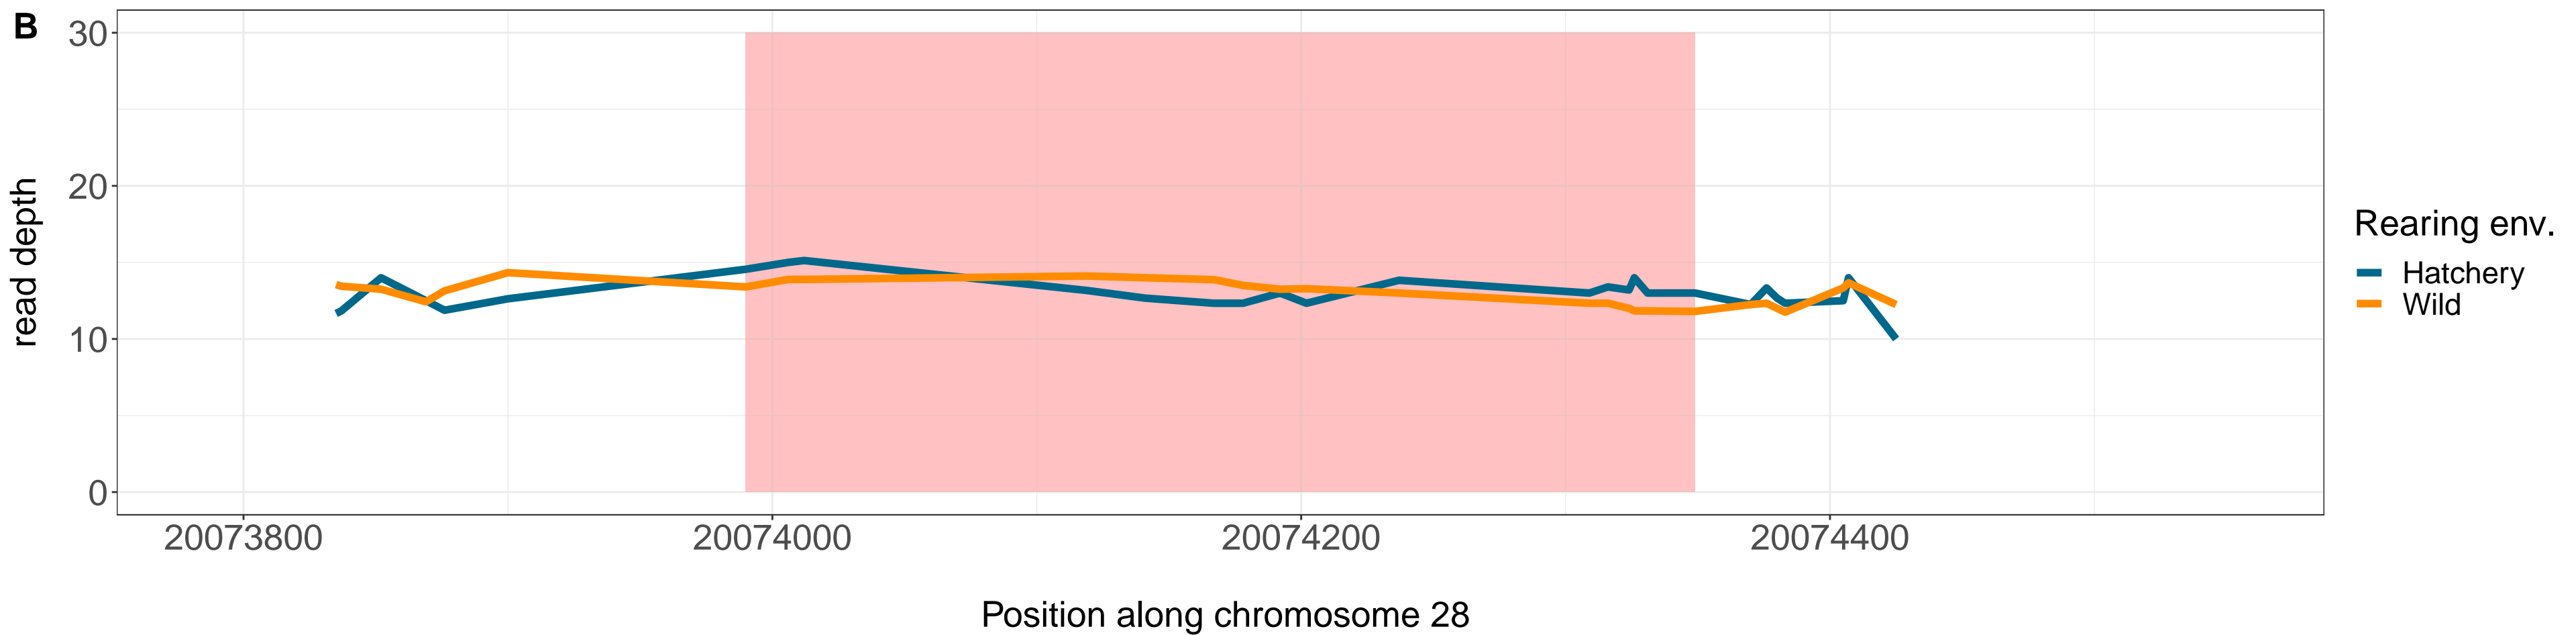

**A**

DMR\_47

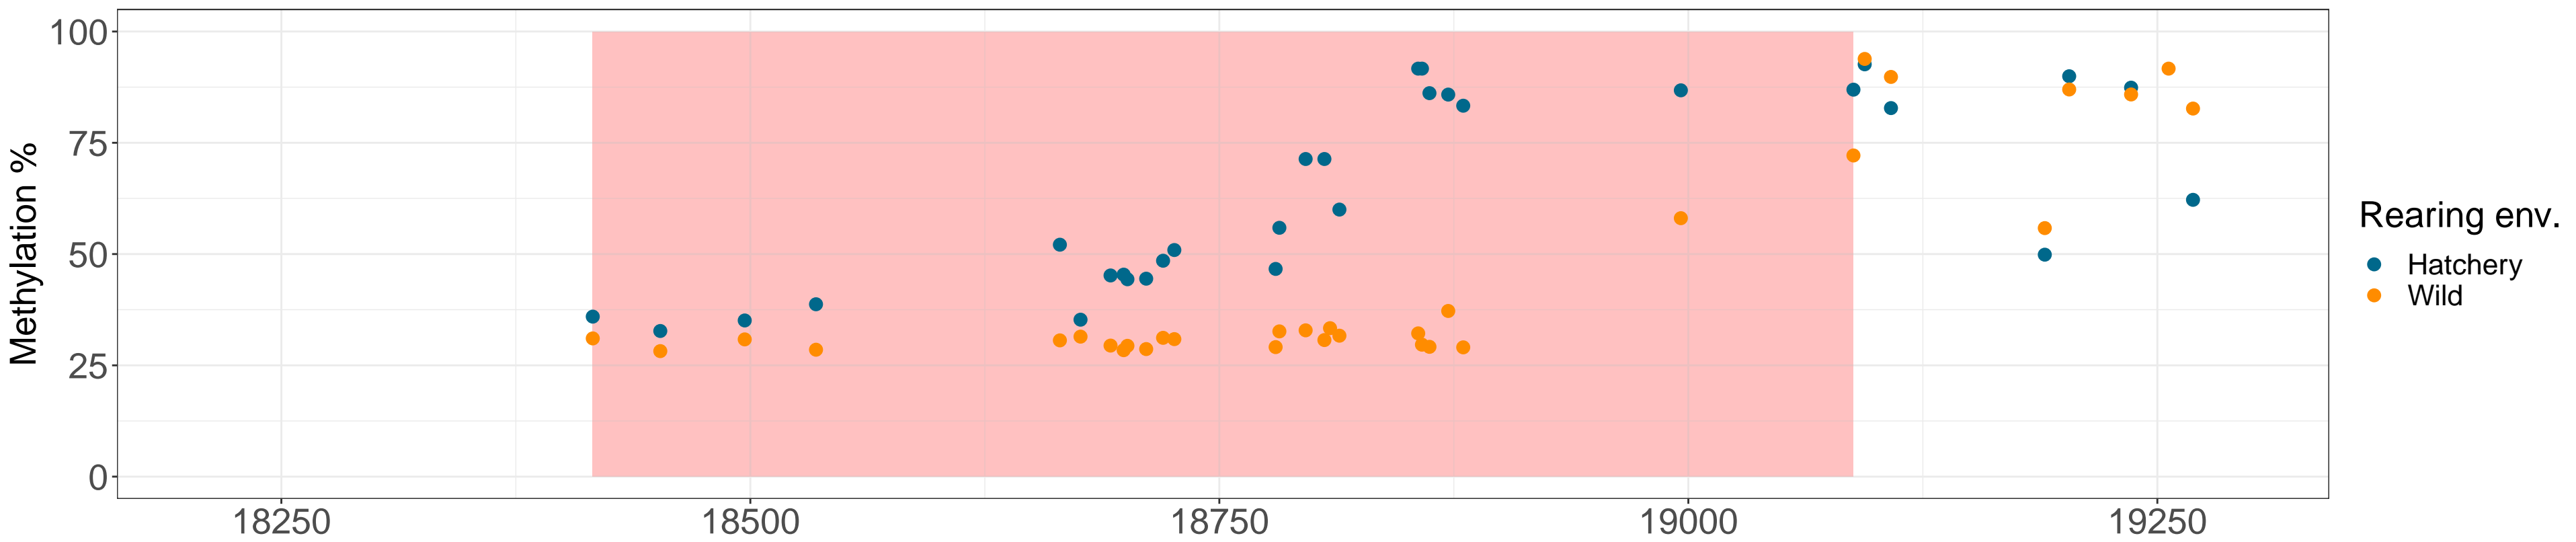**B**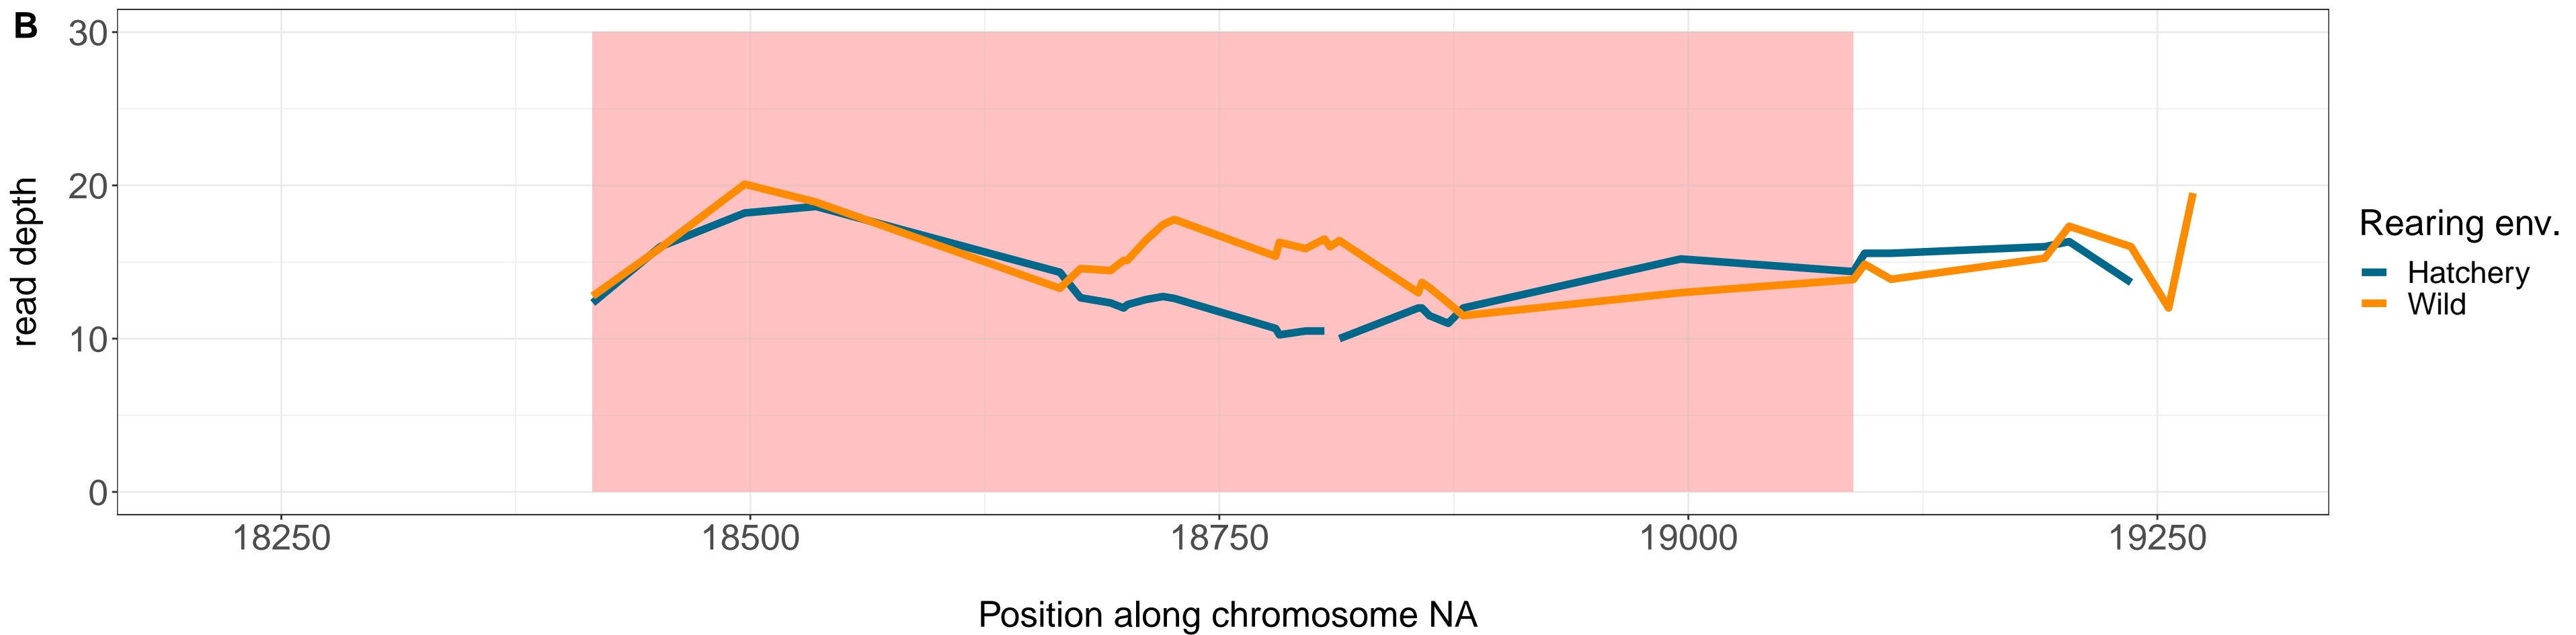

**A**

## DMR\_48

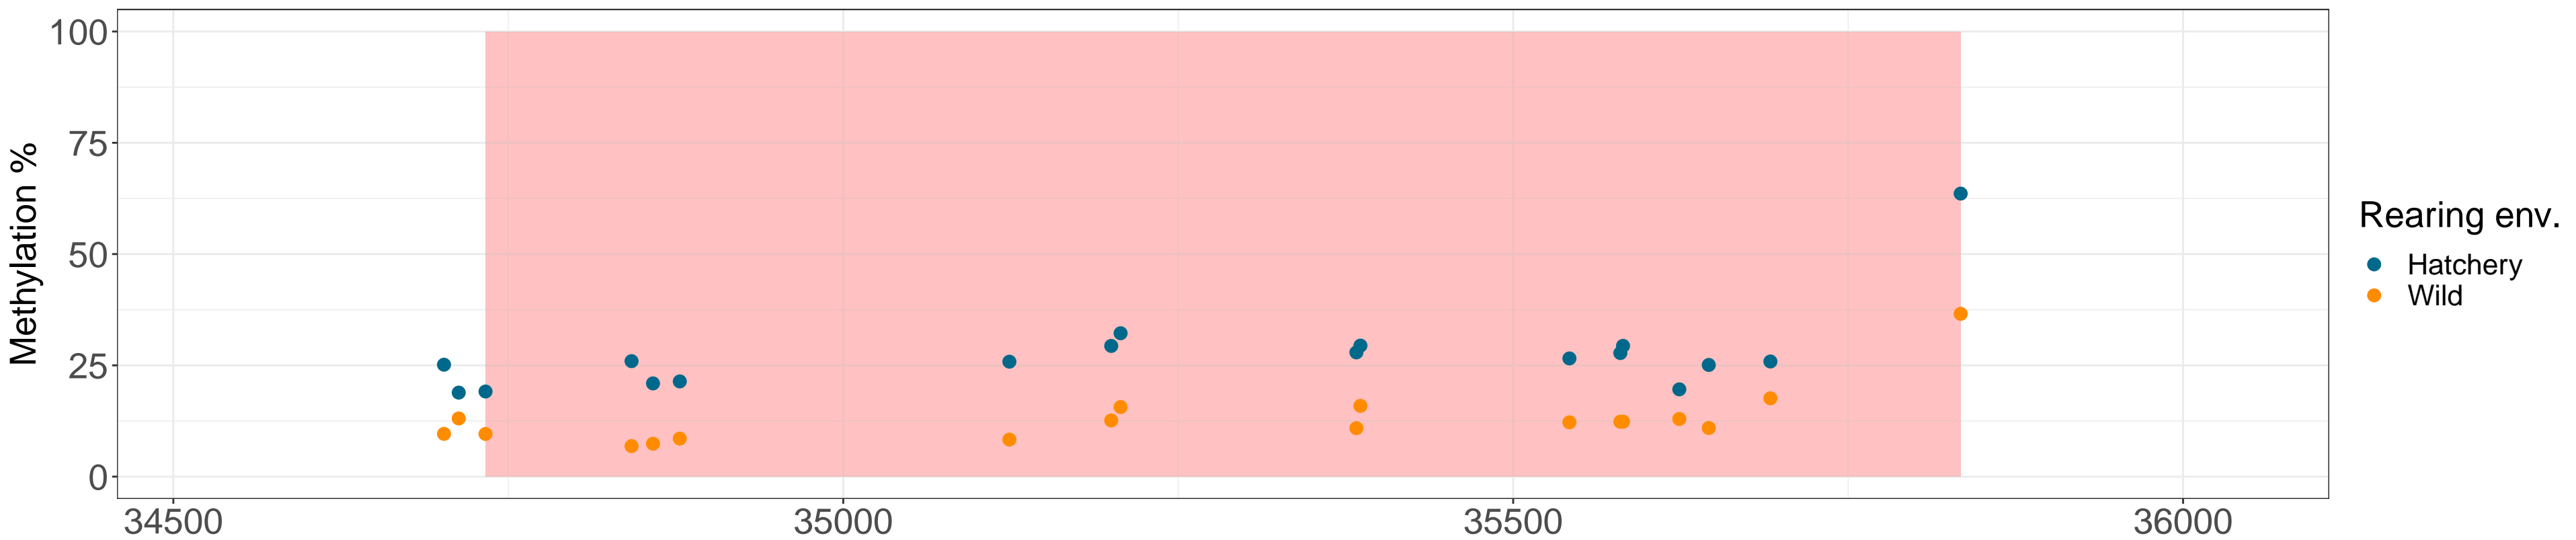**B**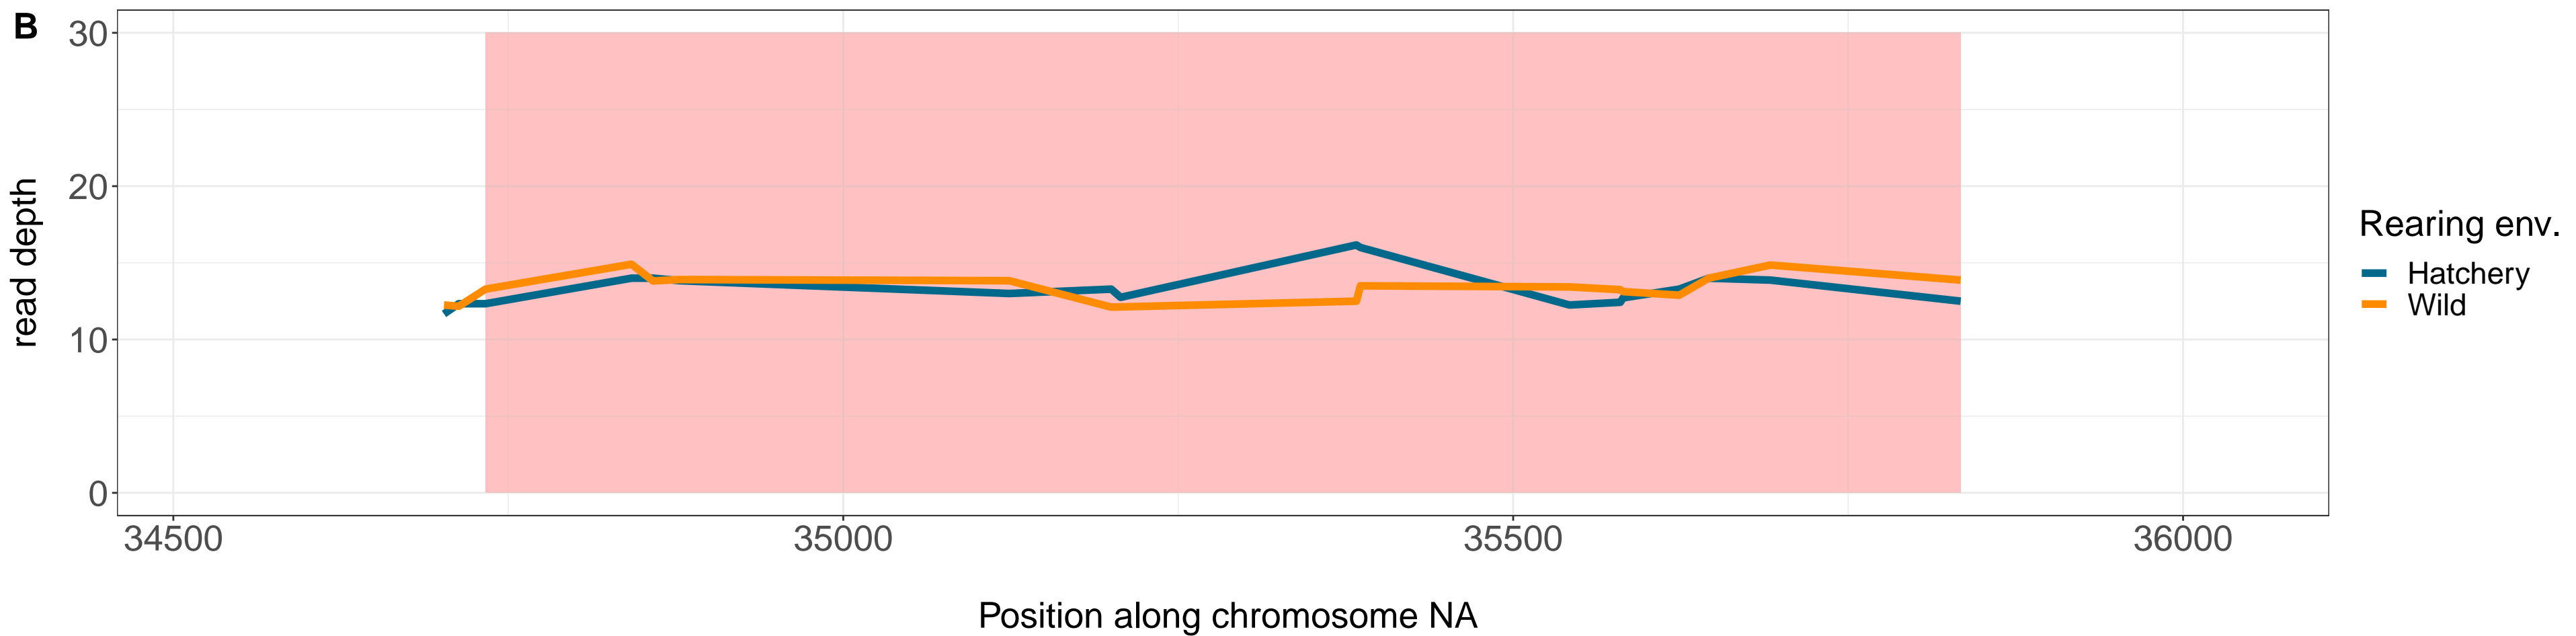



**A**

## DMR\_49

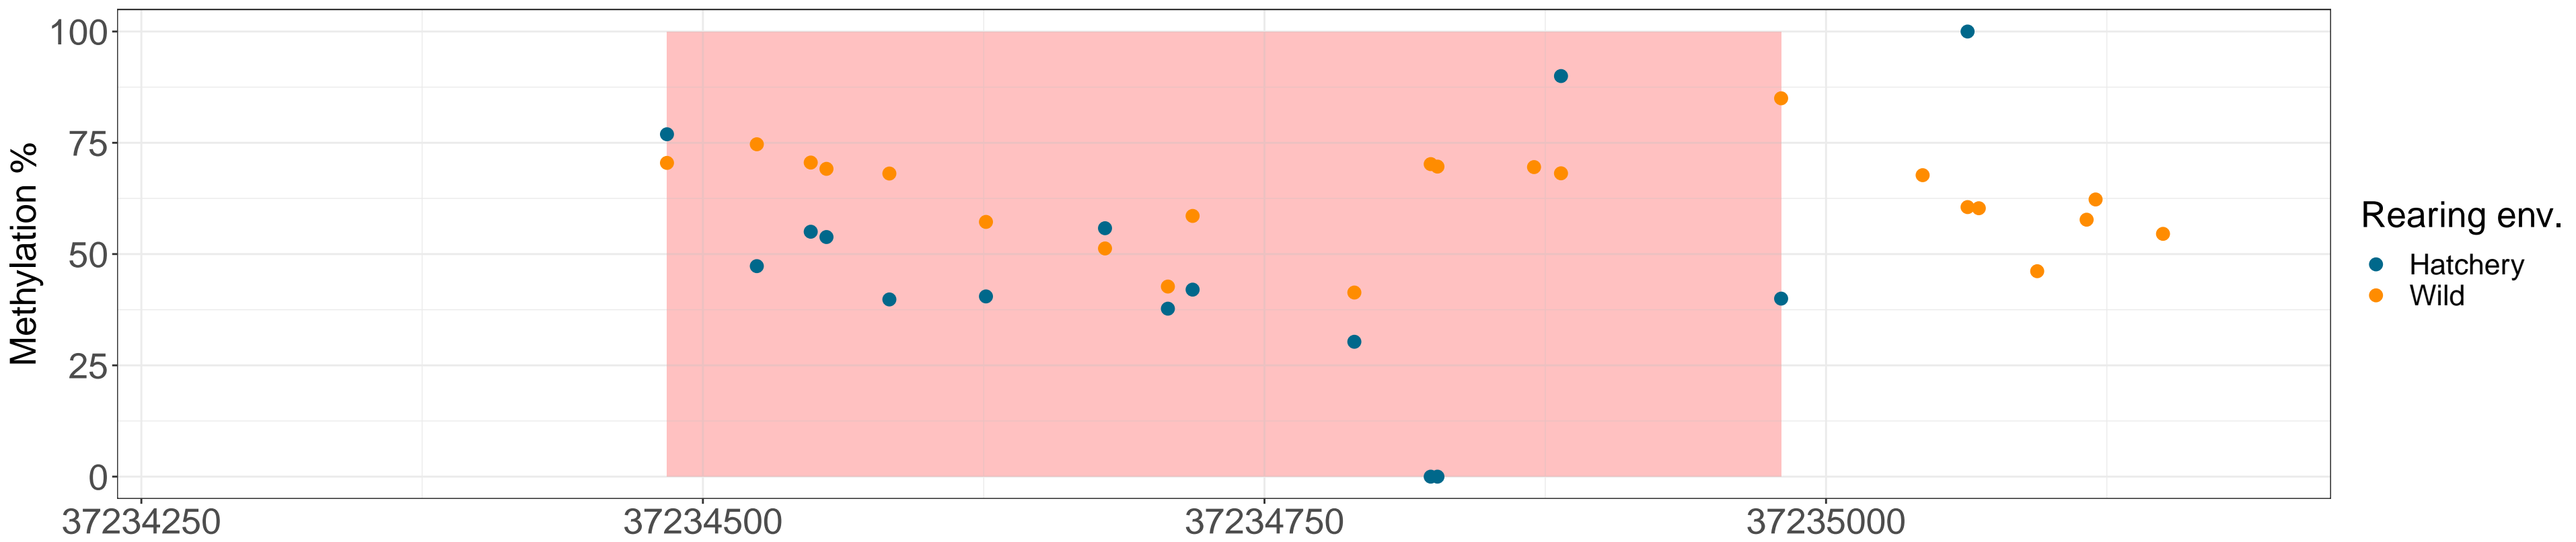**B**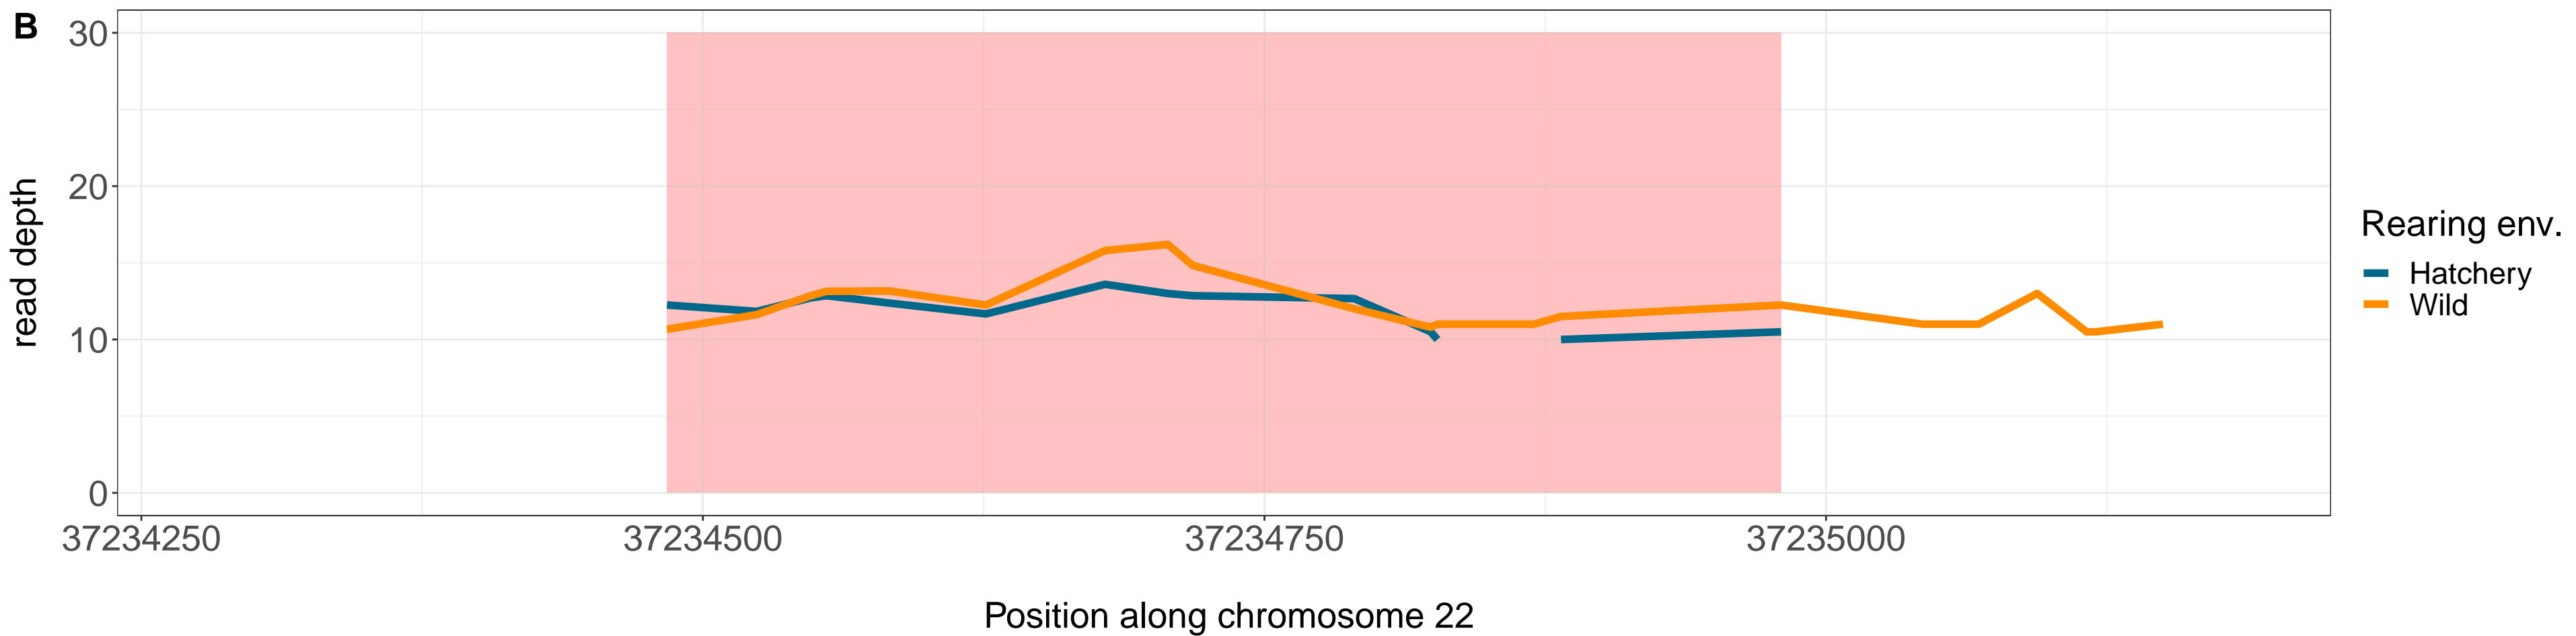

**A**

## DMR\_50

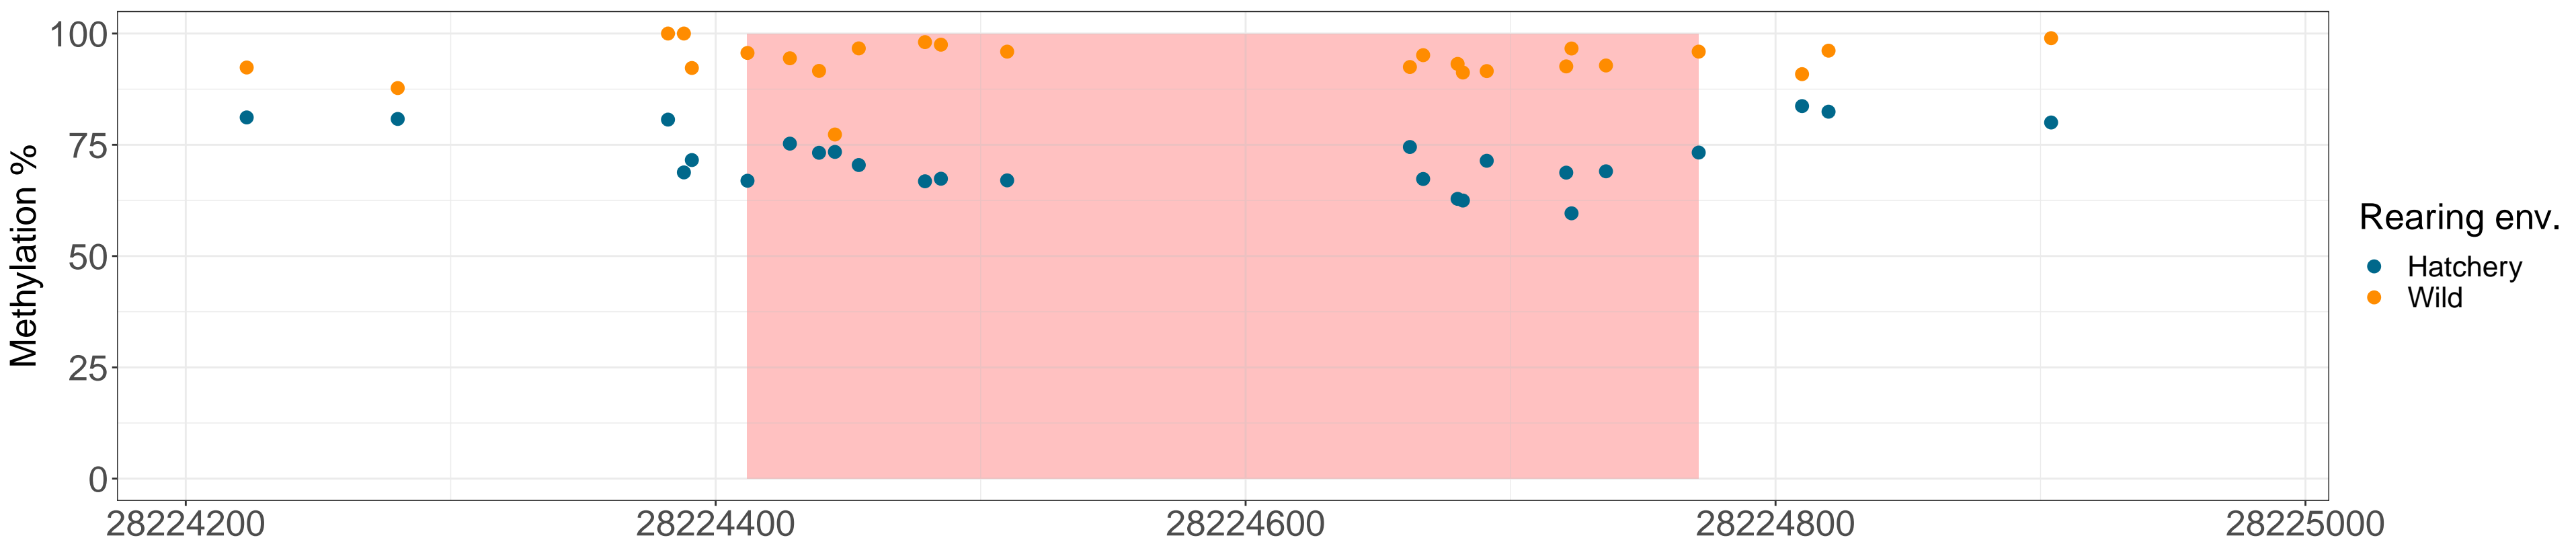**B**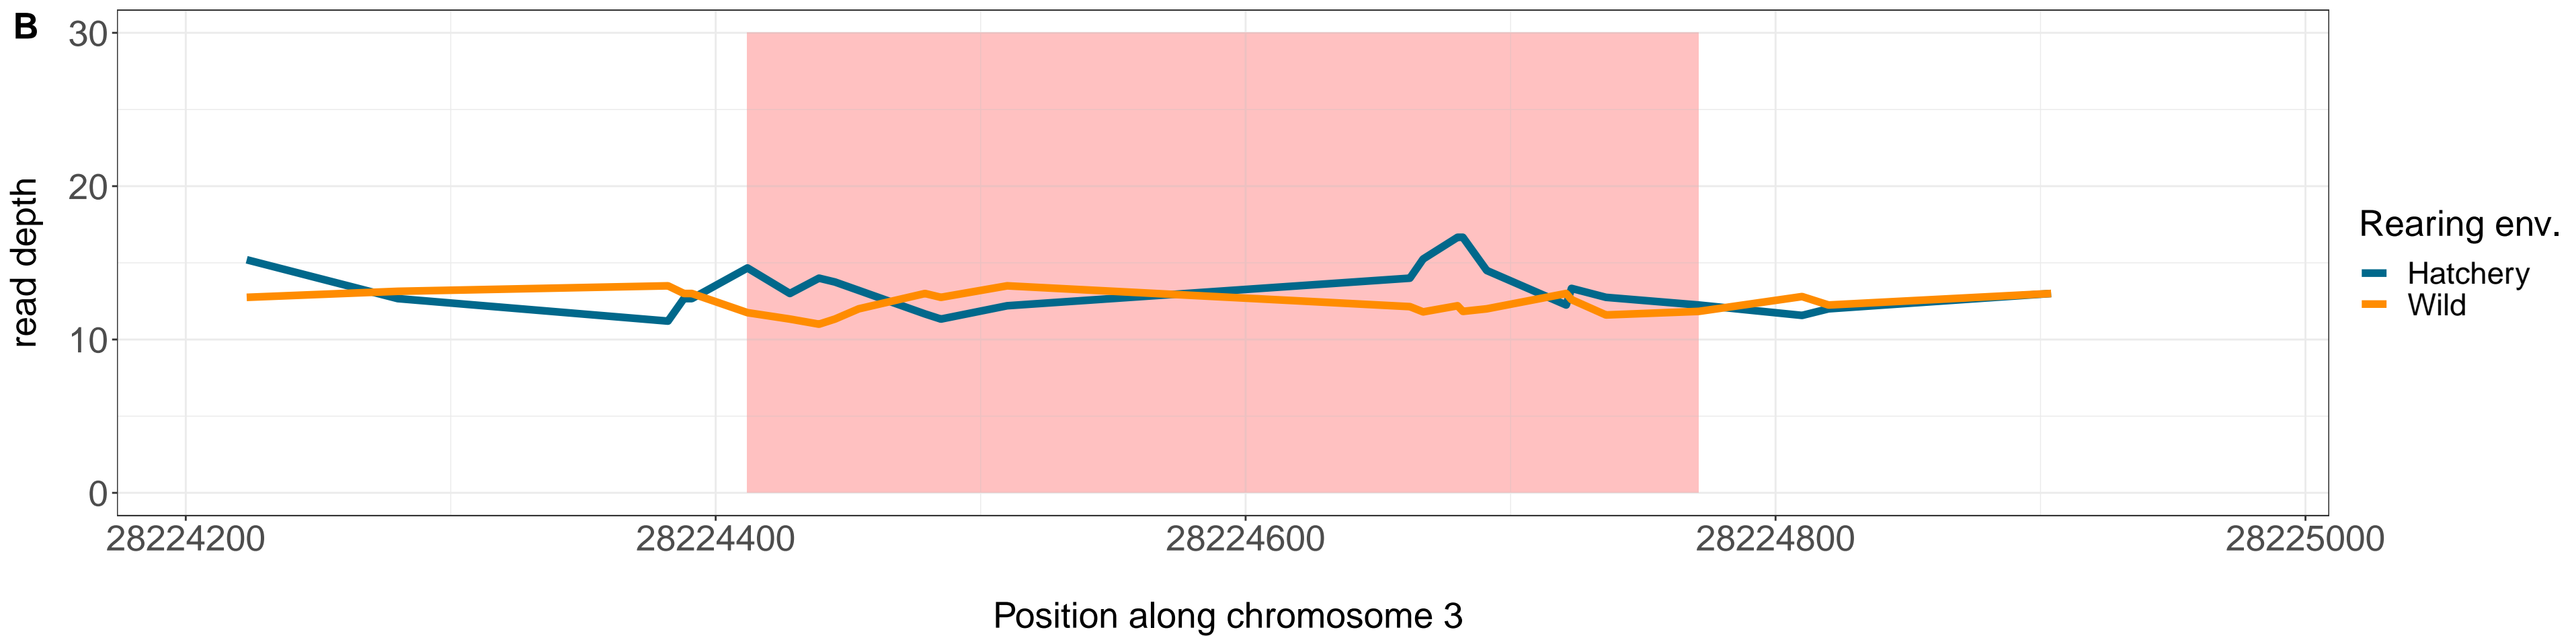

# DMR\_51

XM\_020478473.1

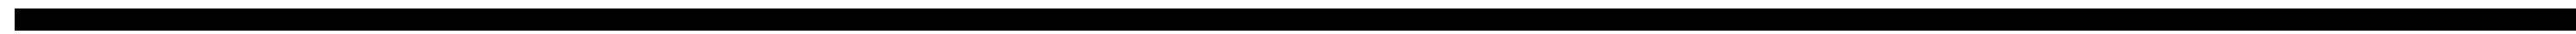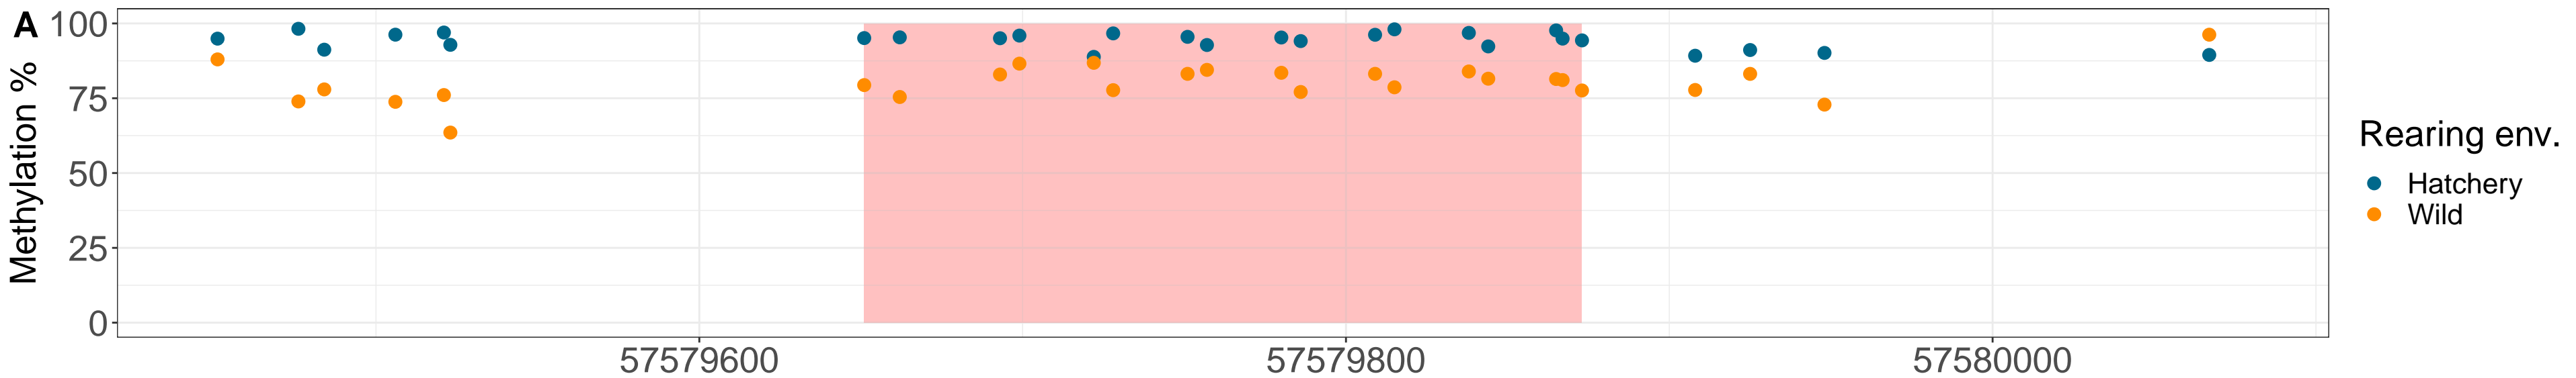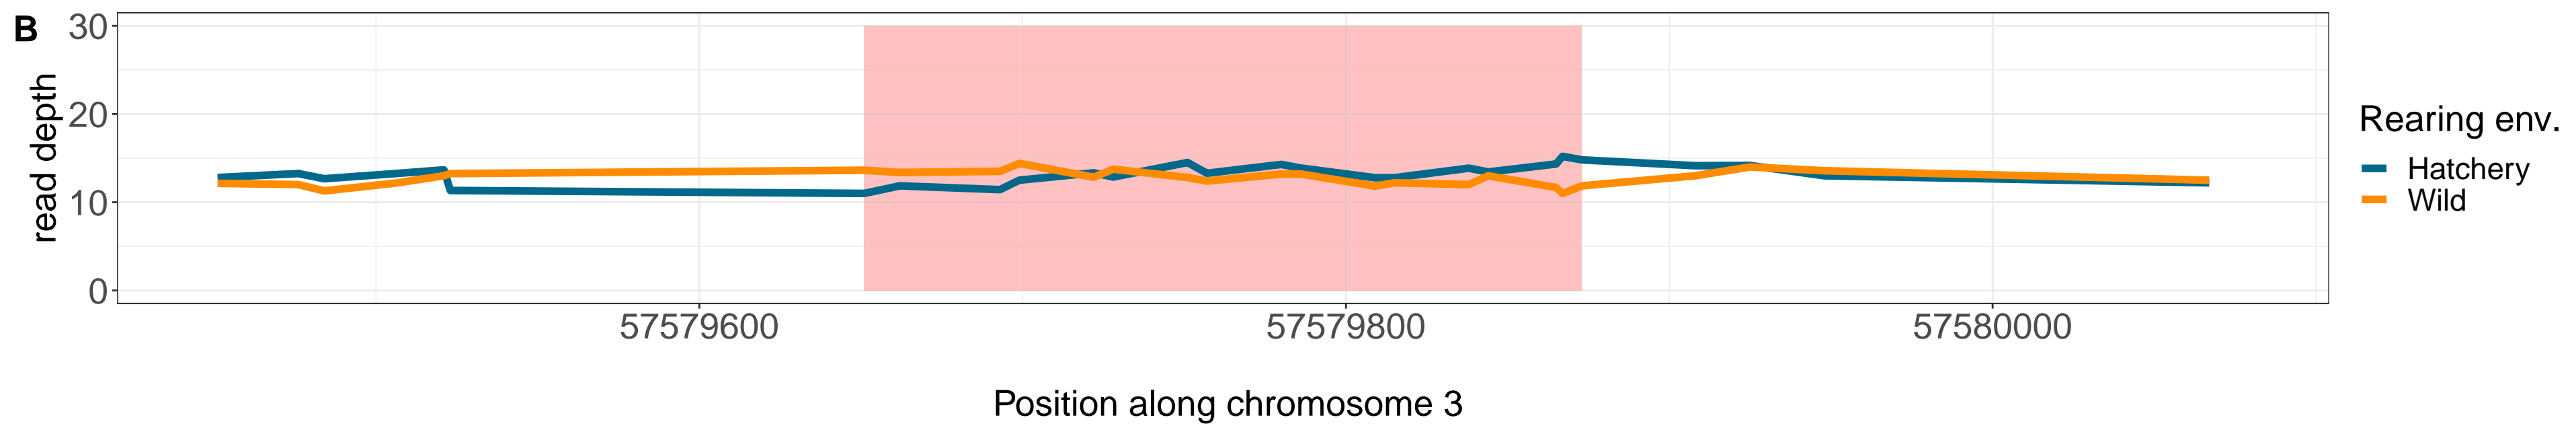

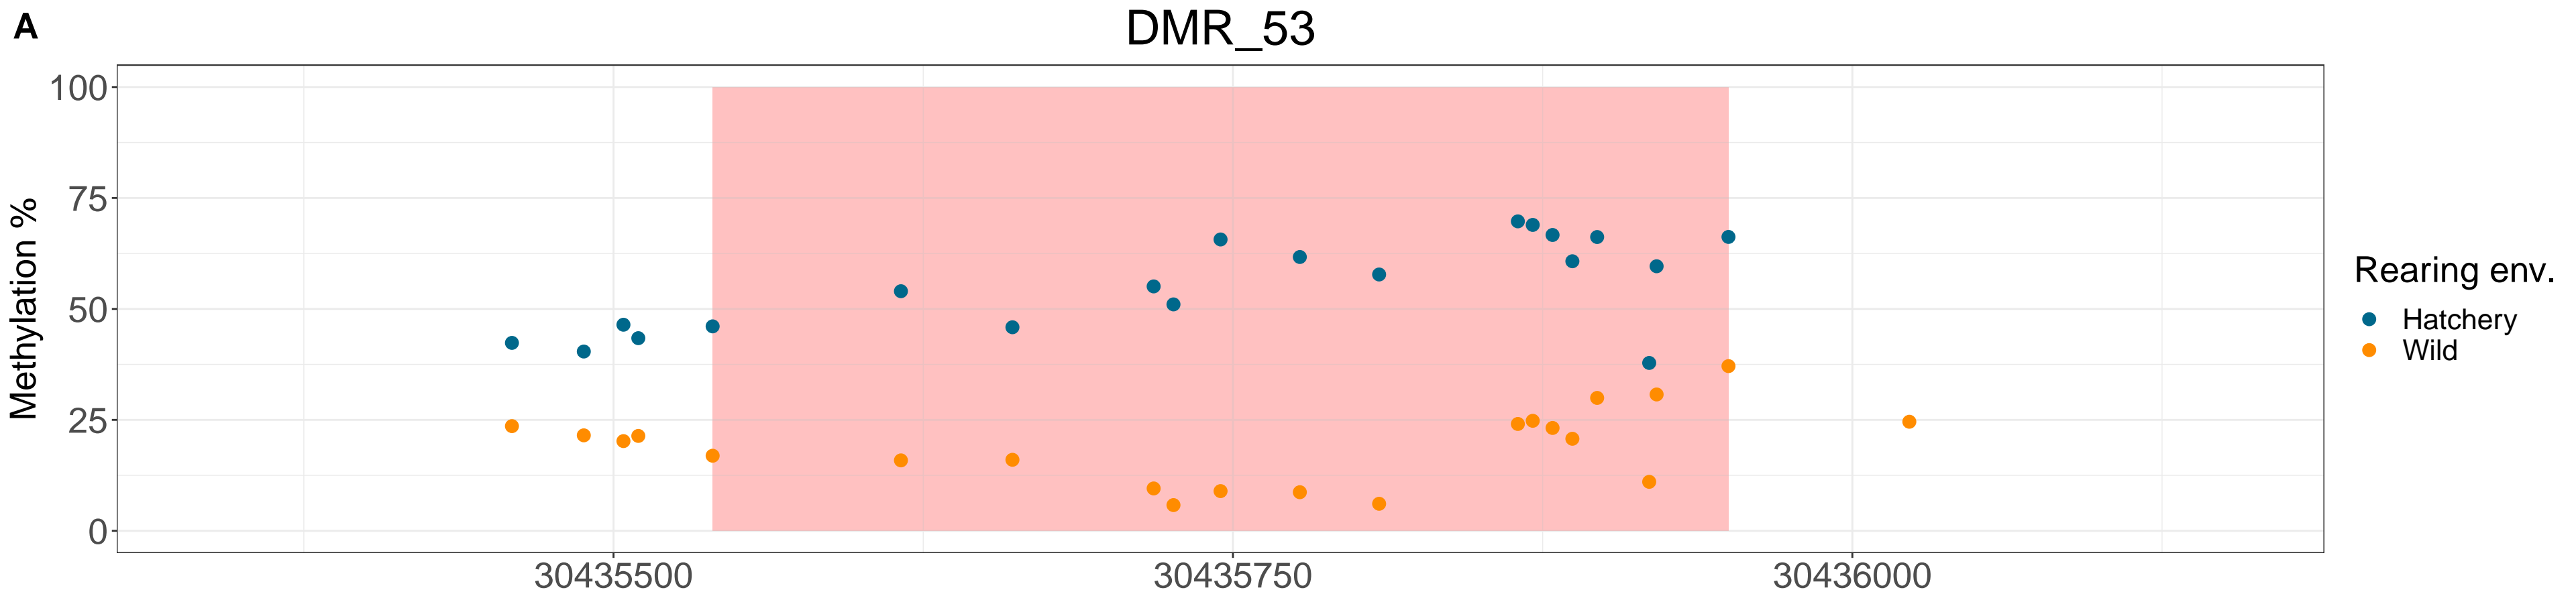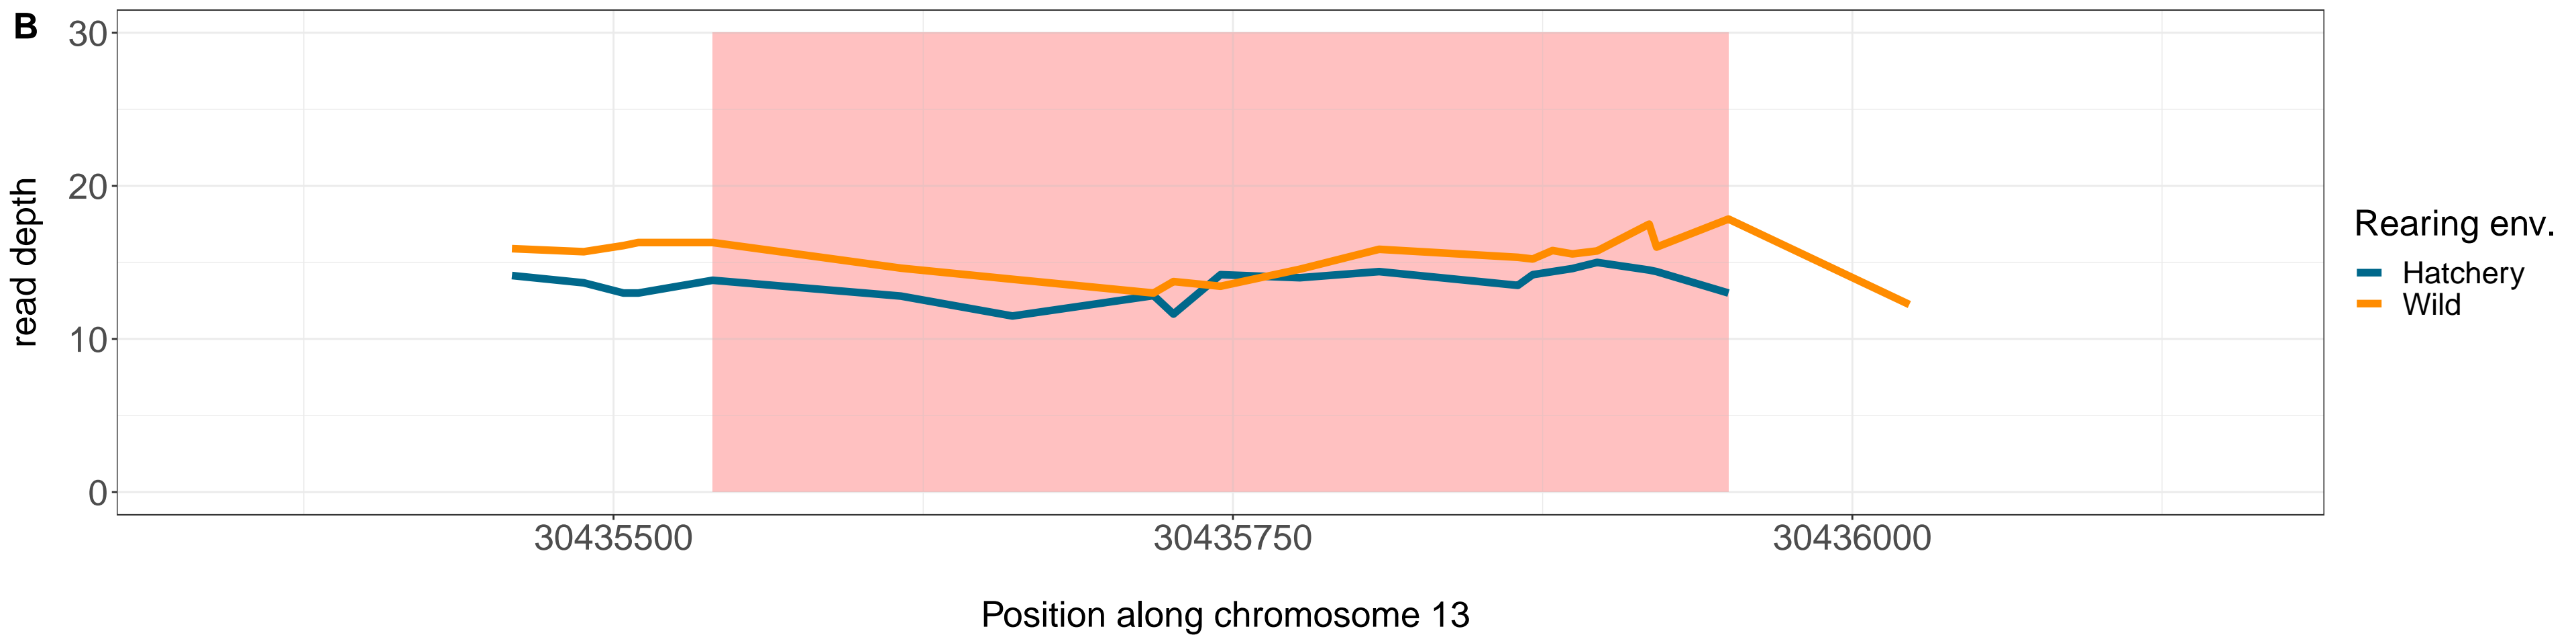

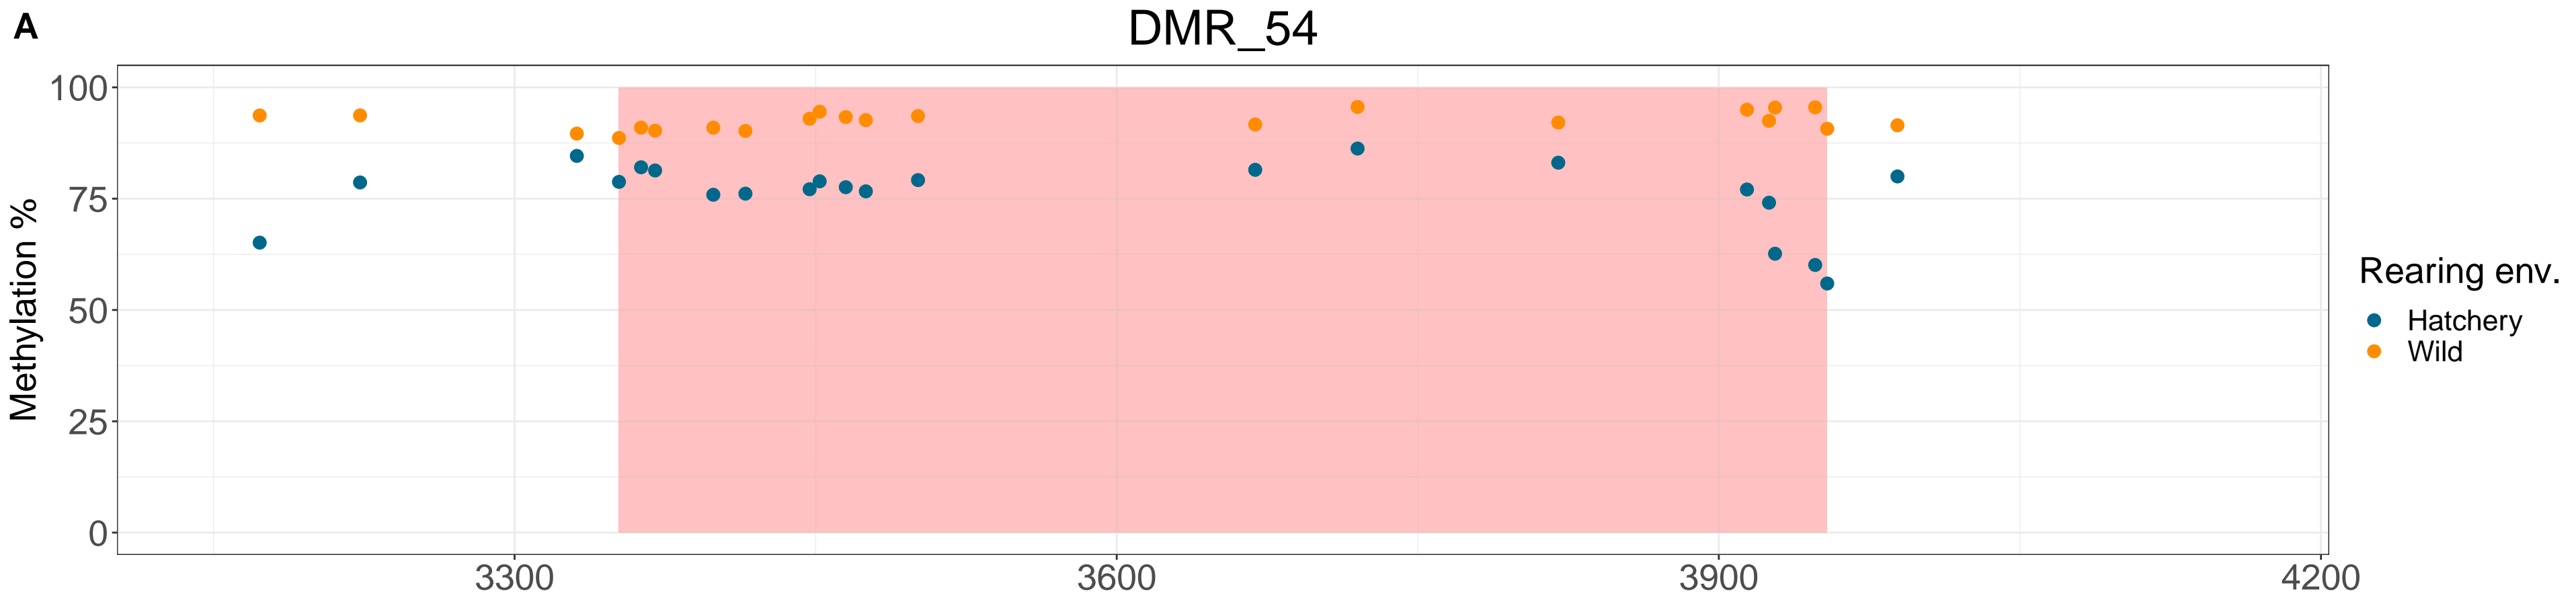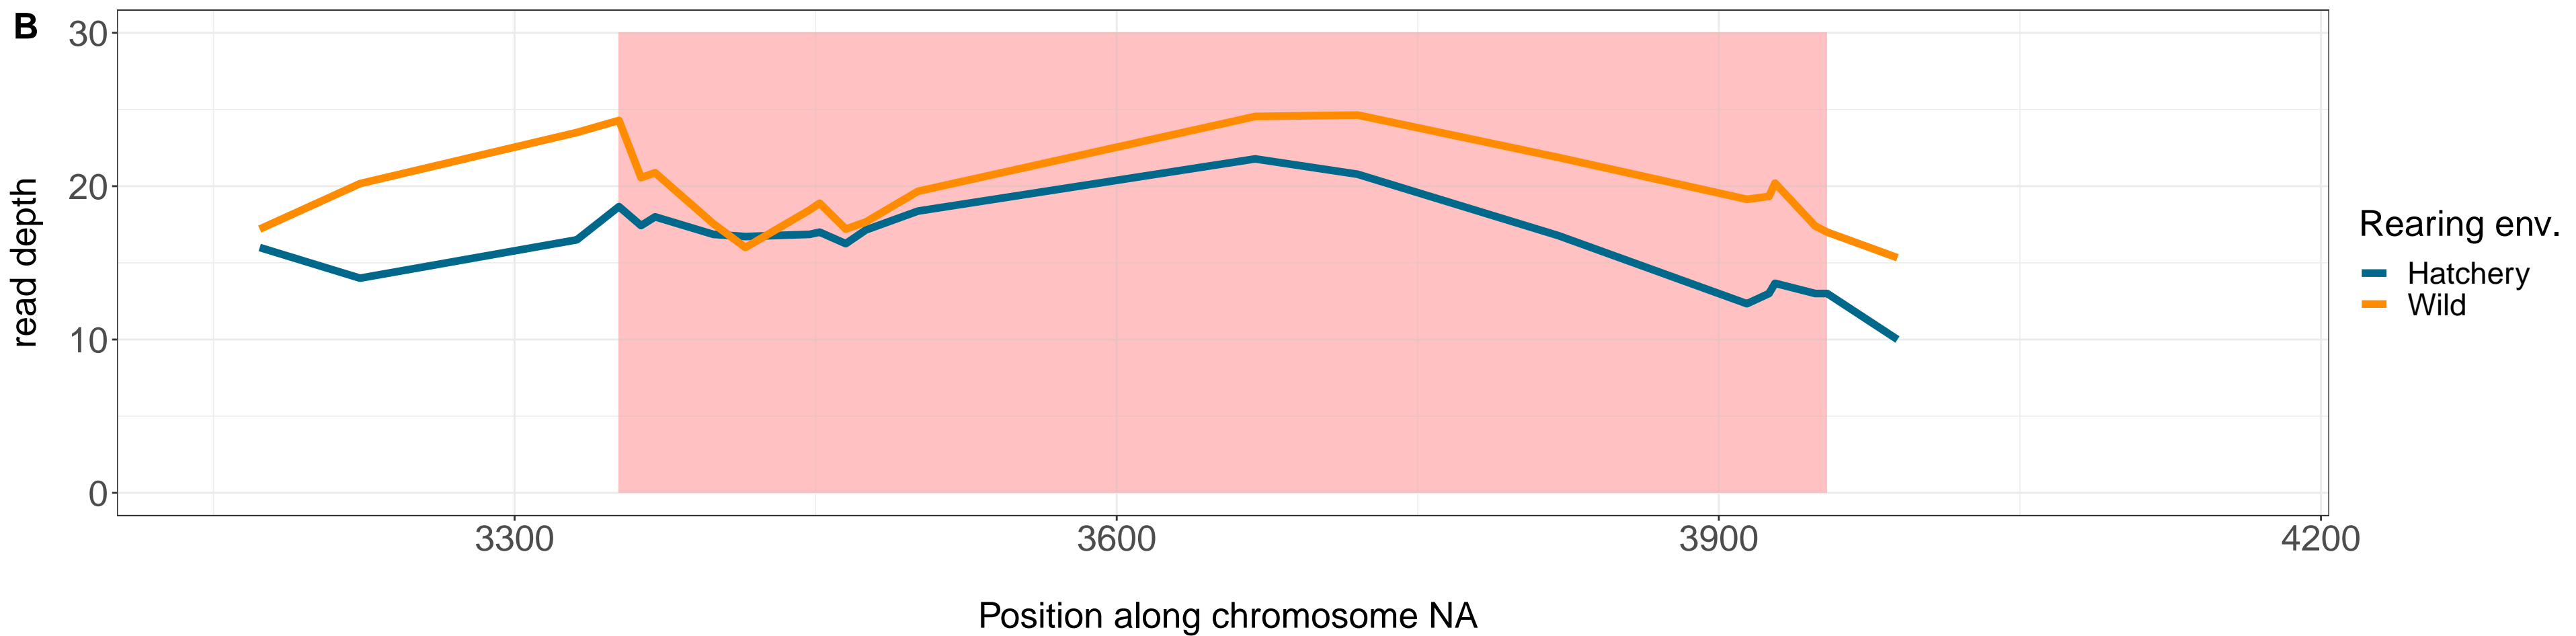

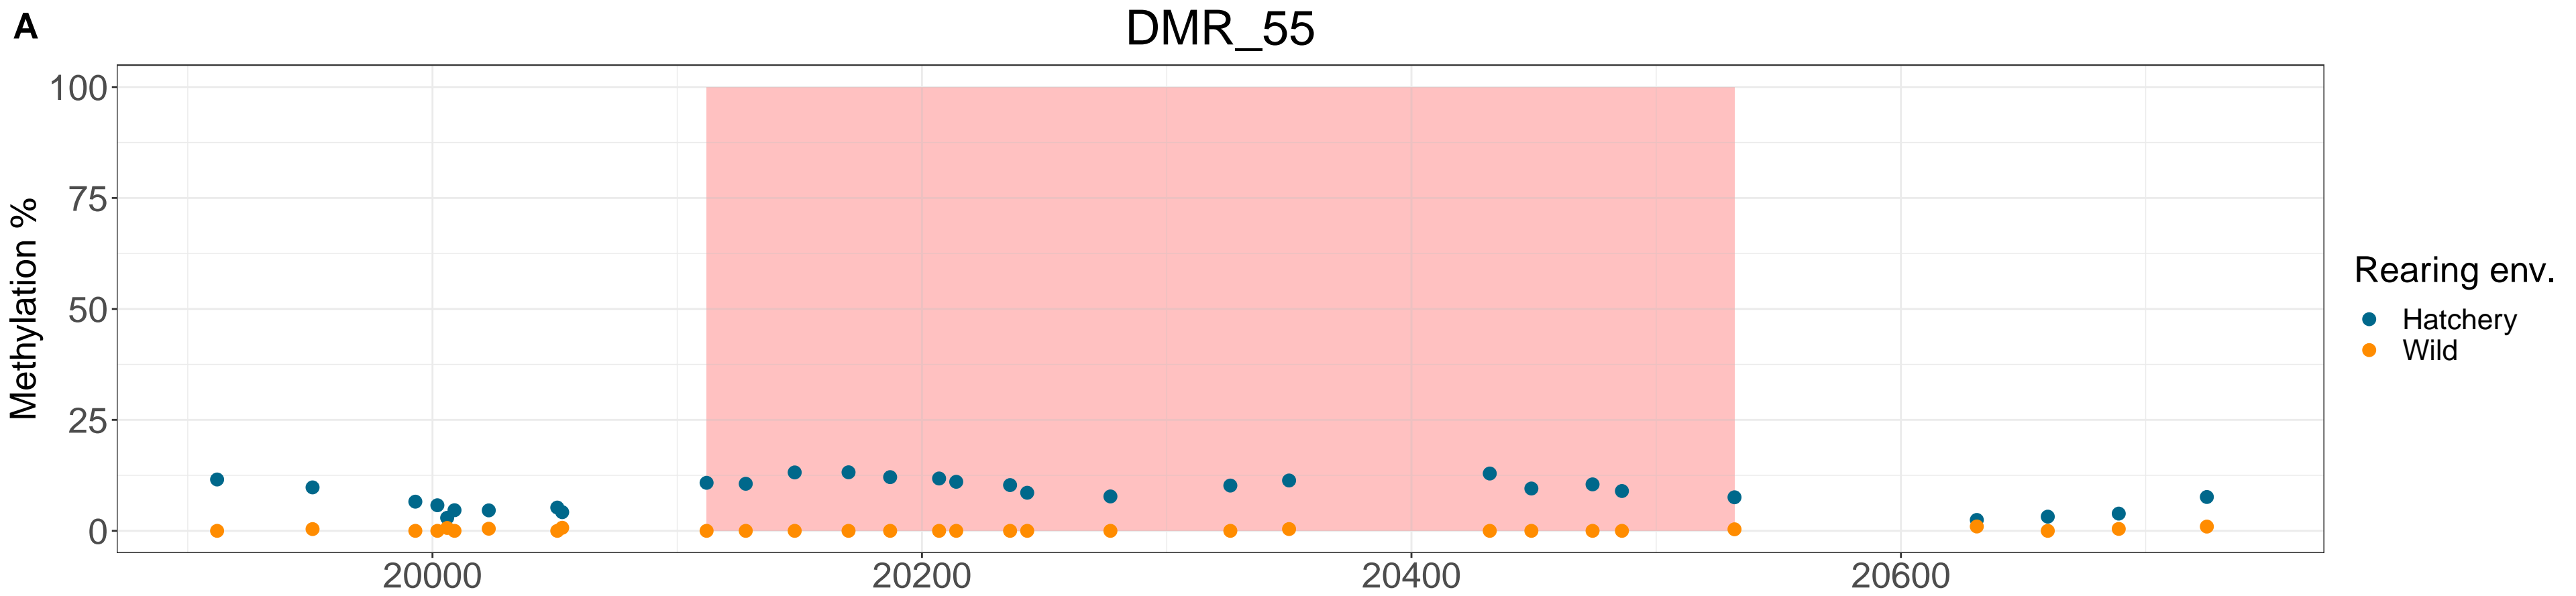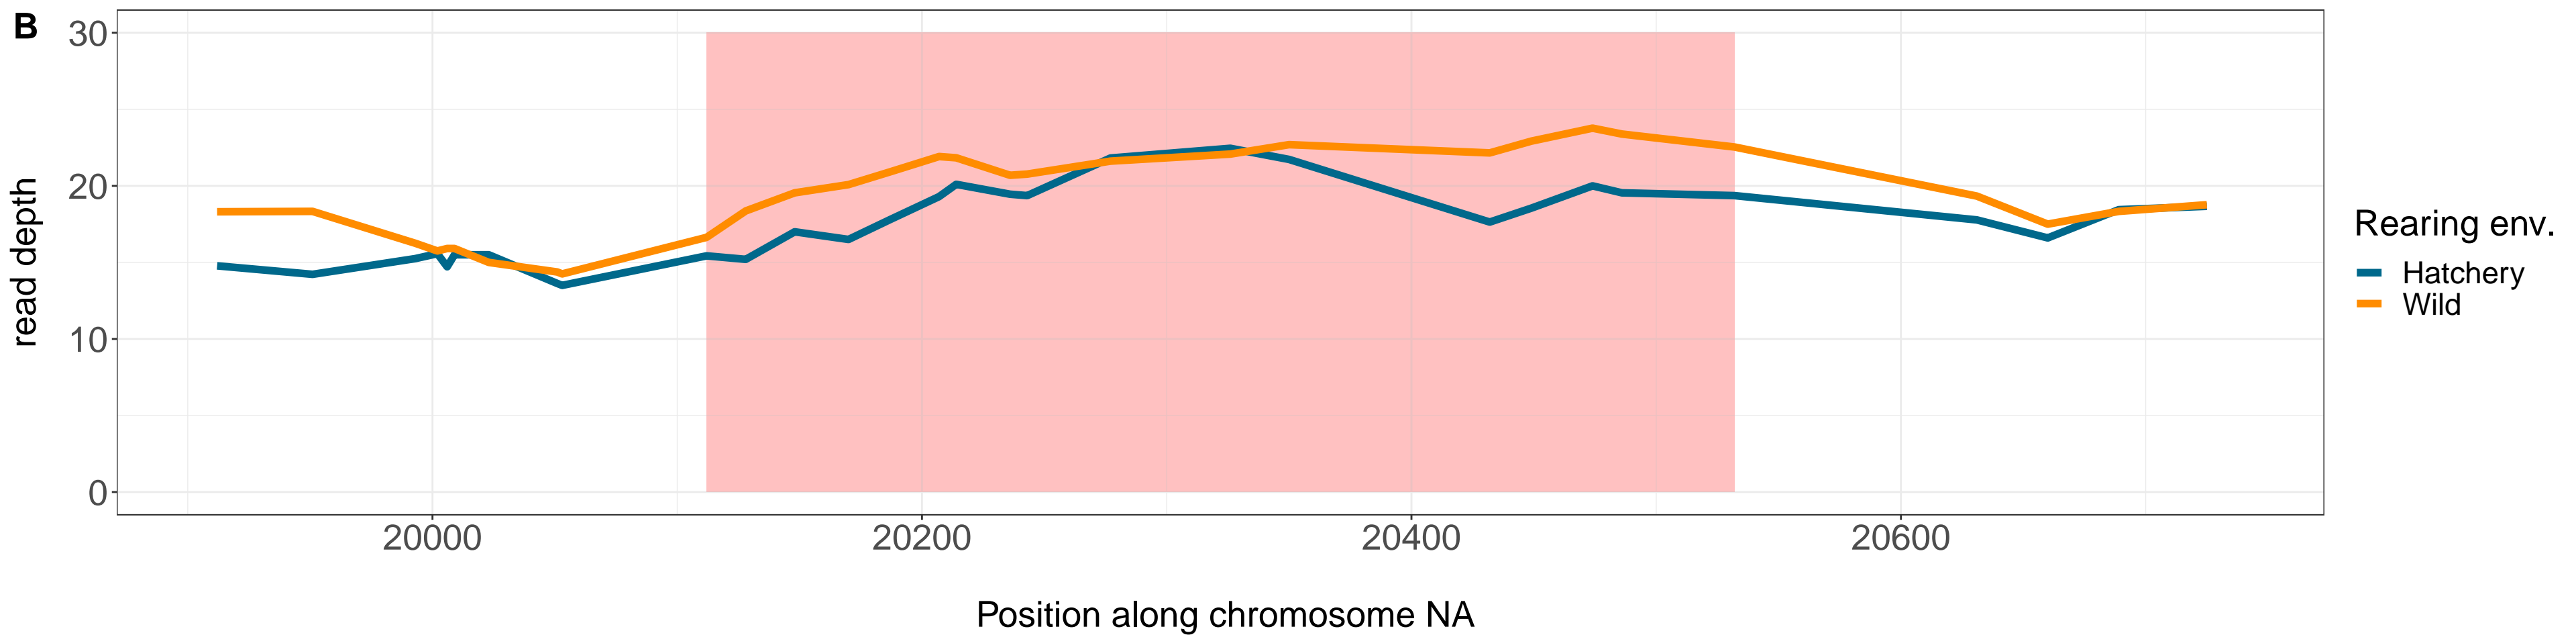

**A**

## DMR\_56

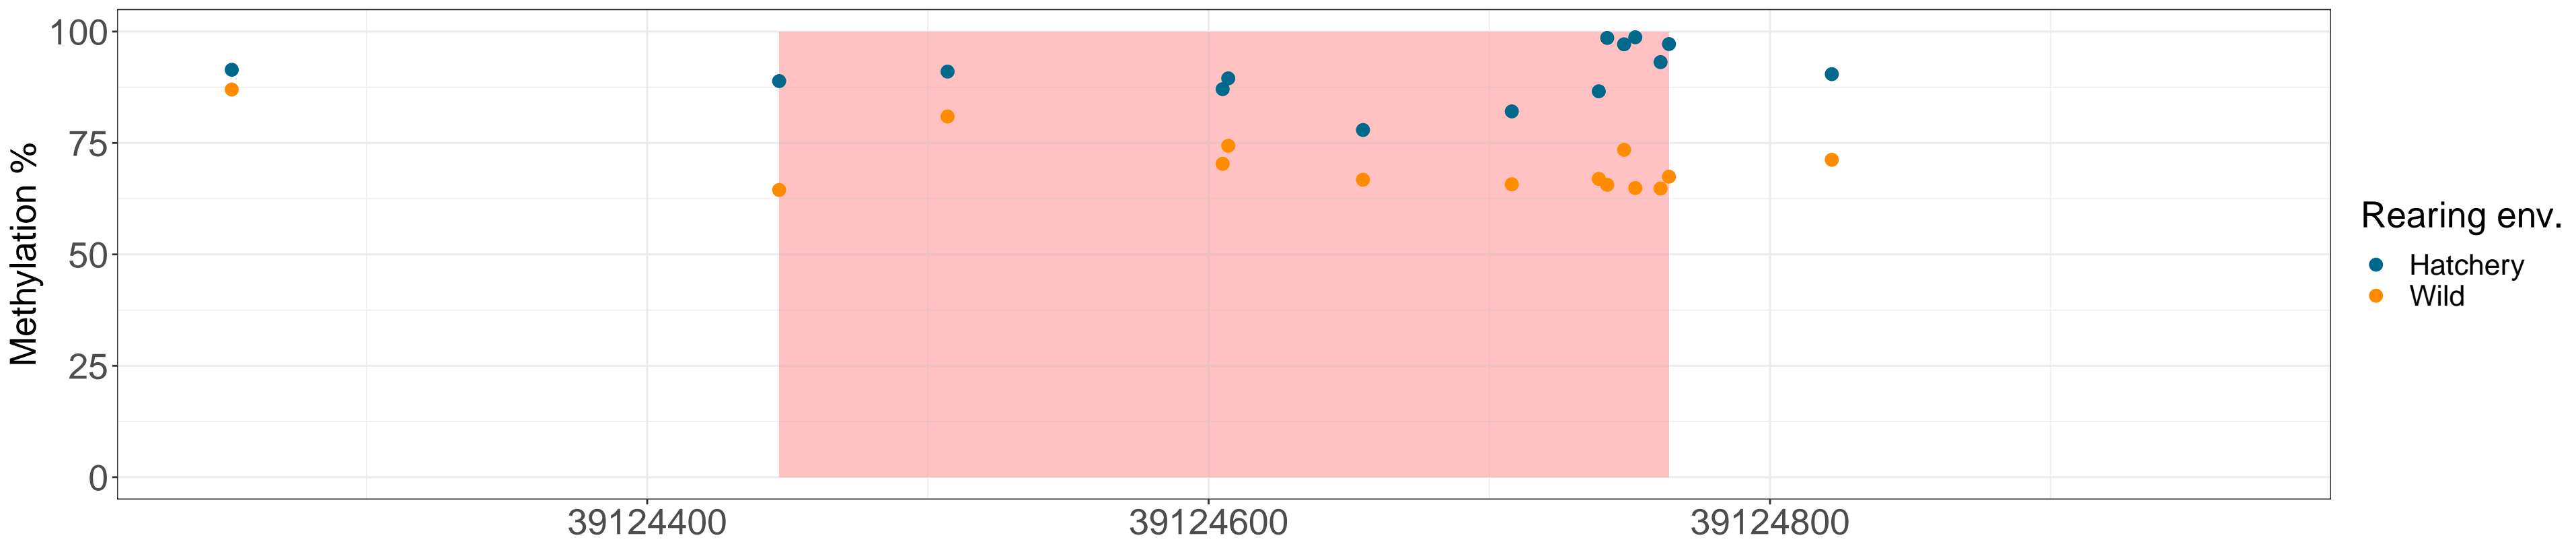**B**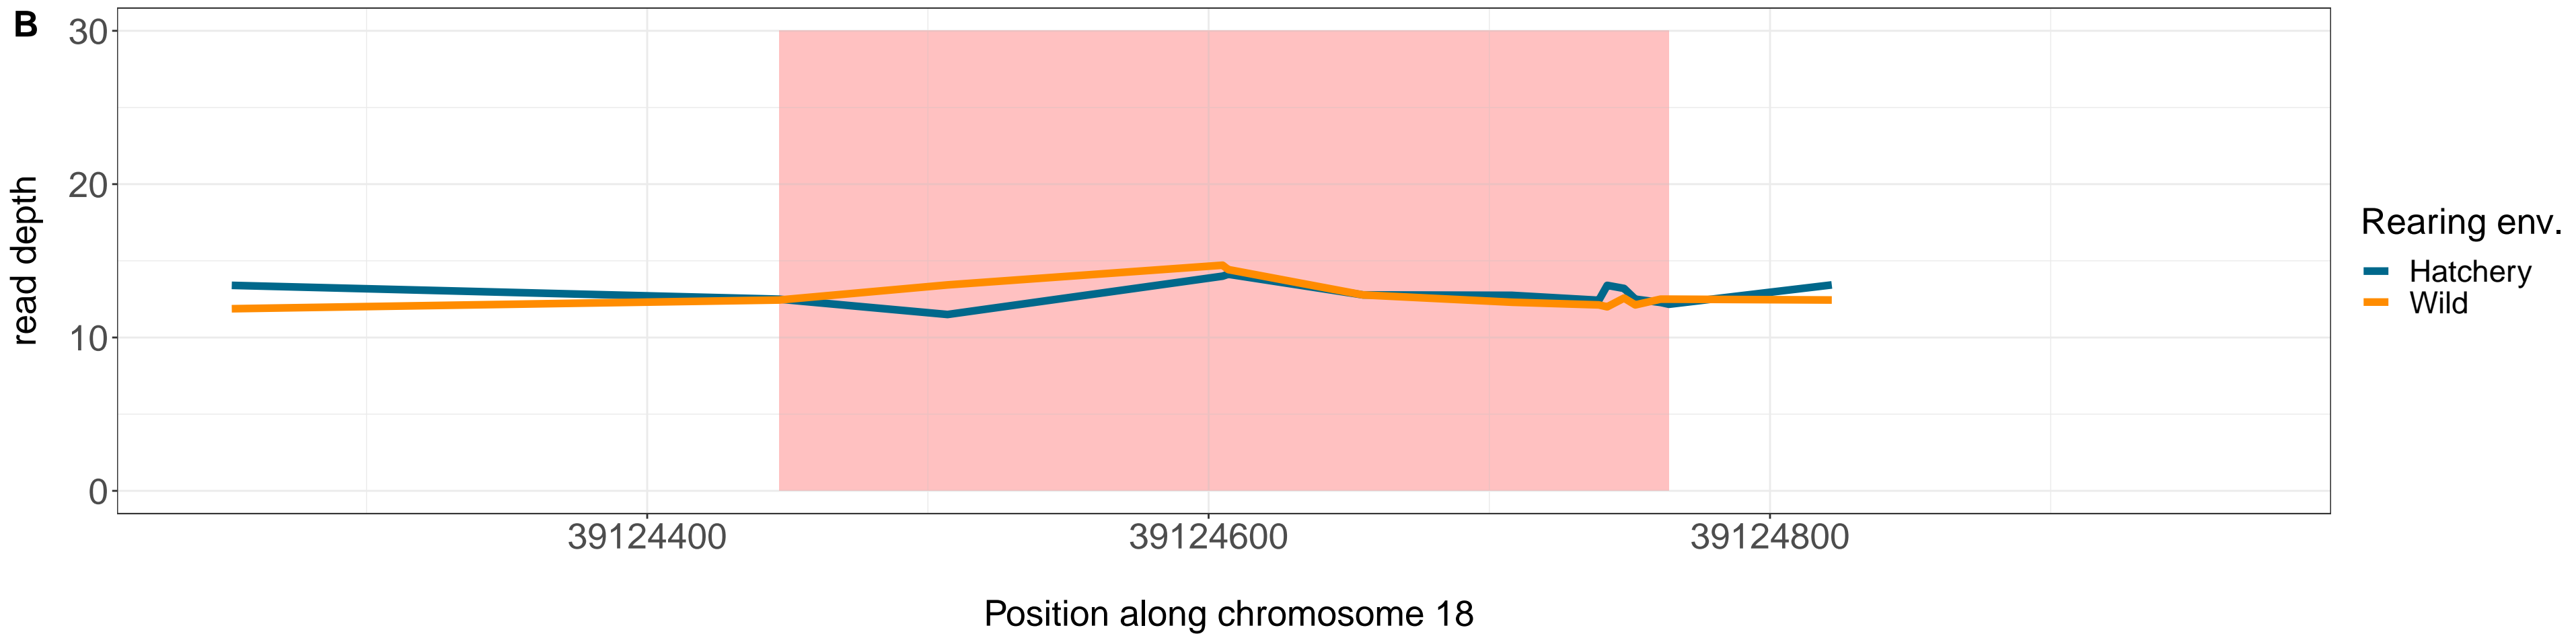

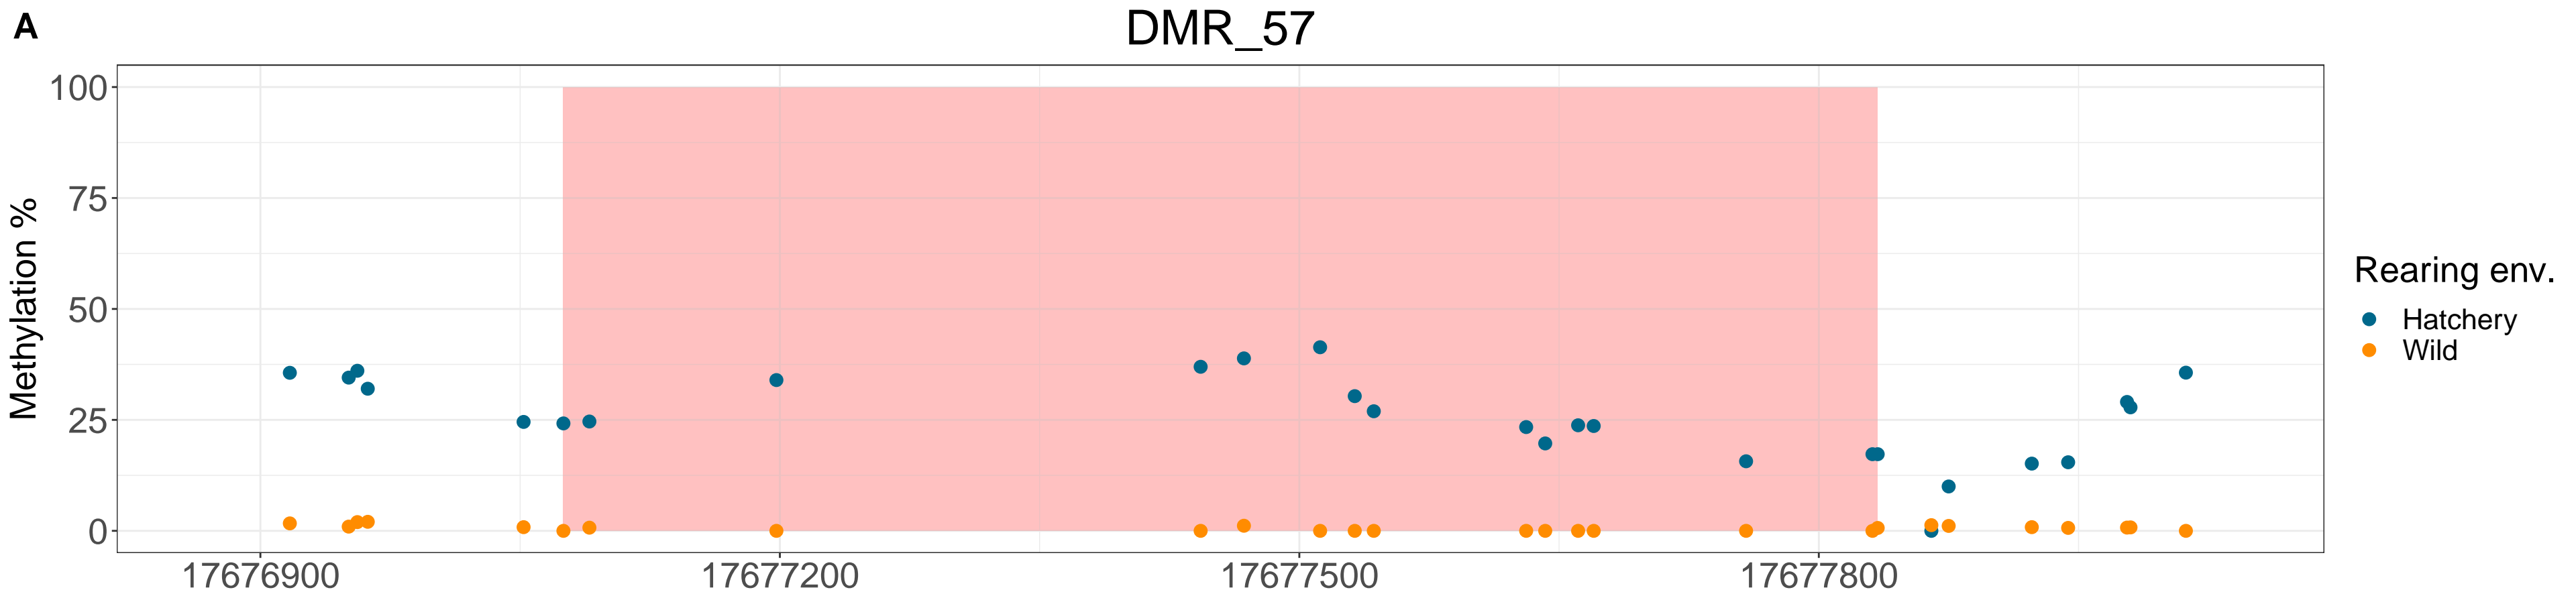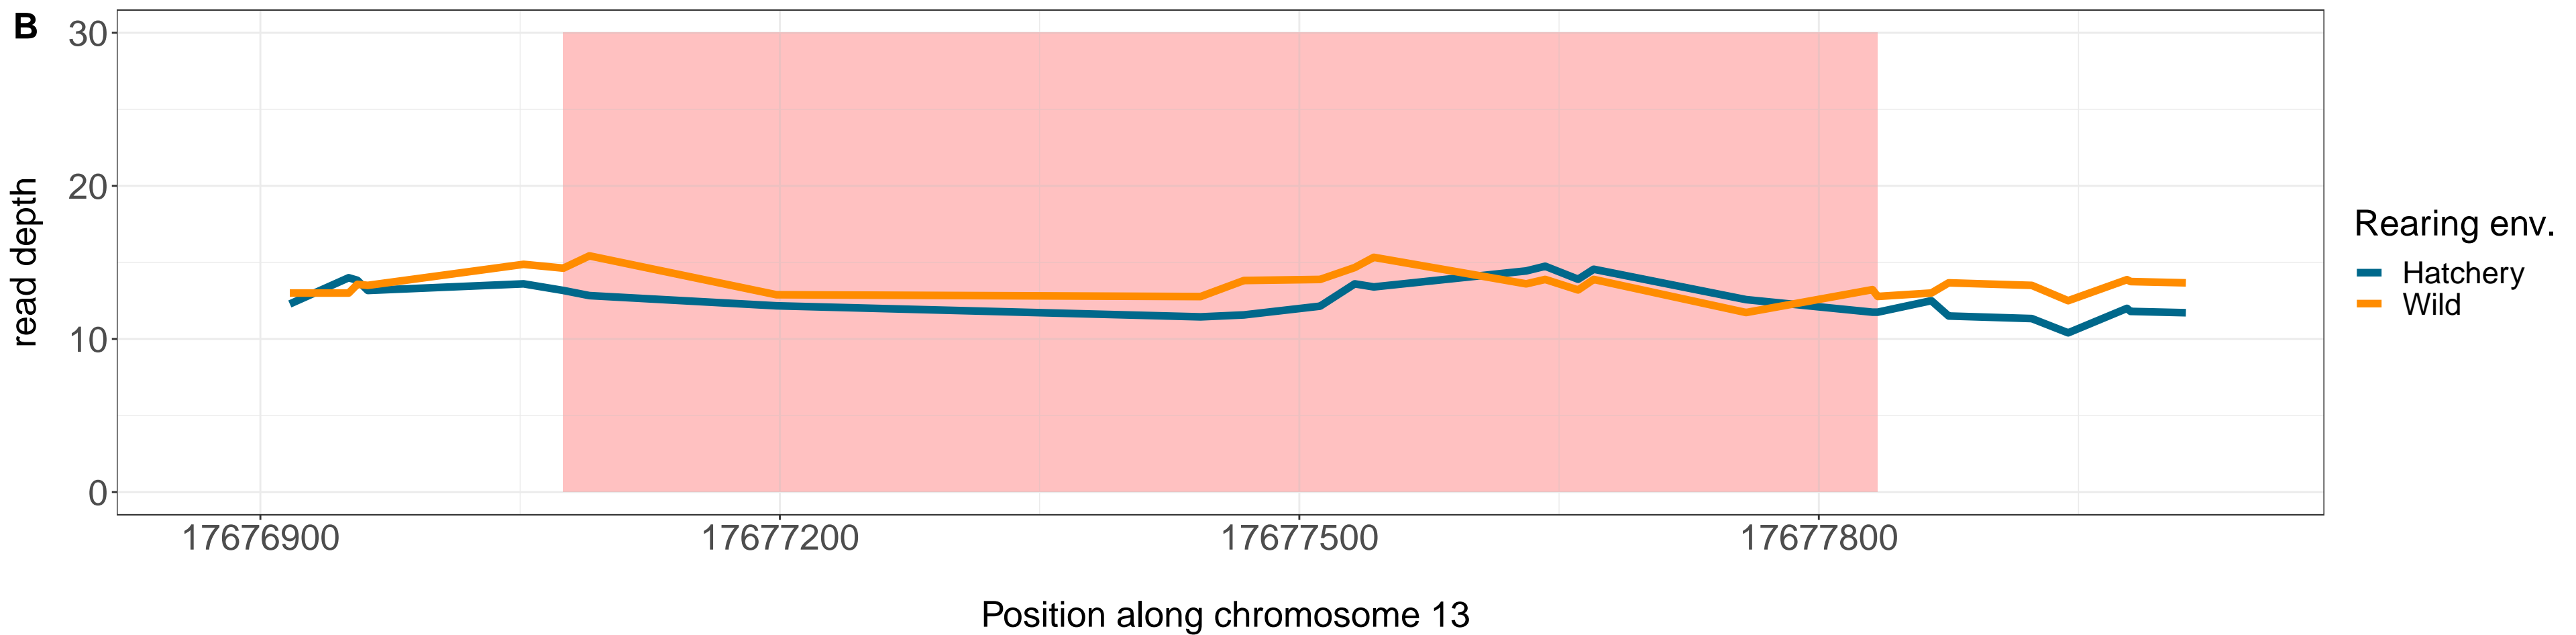



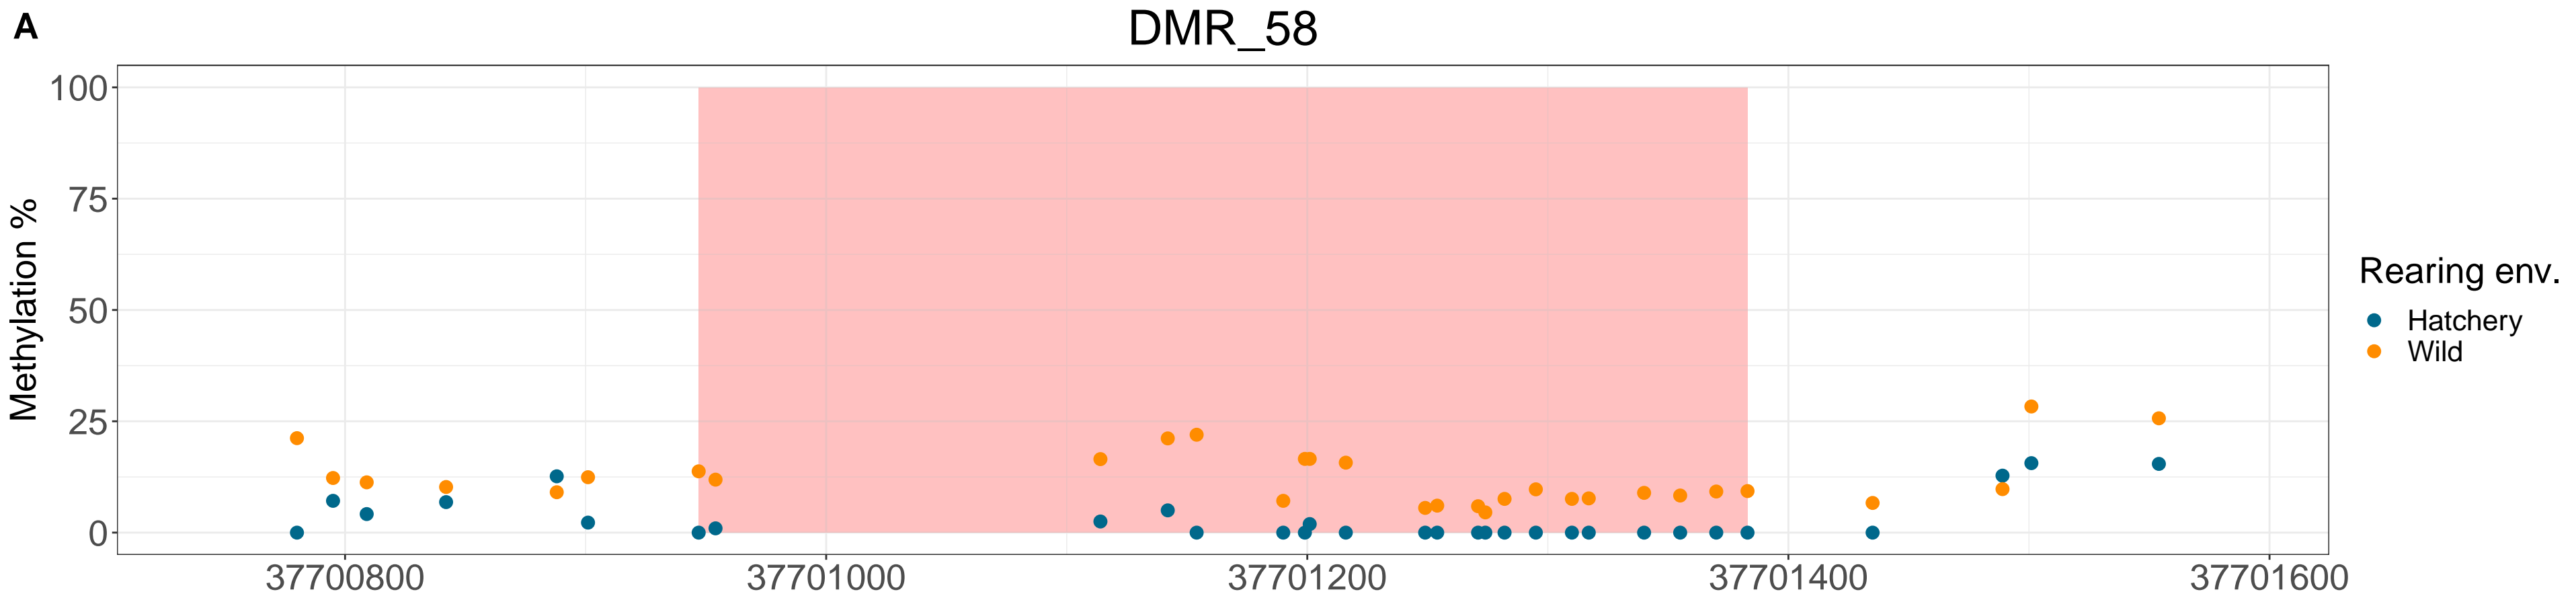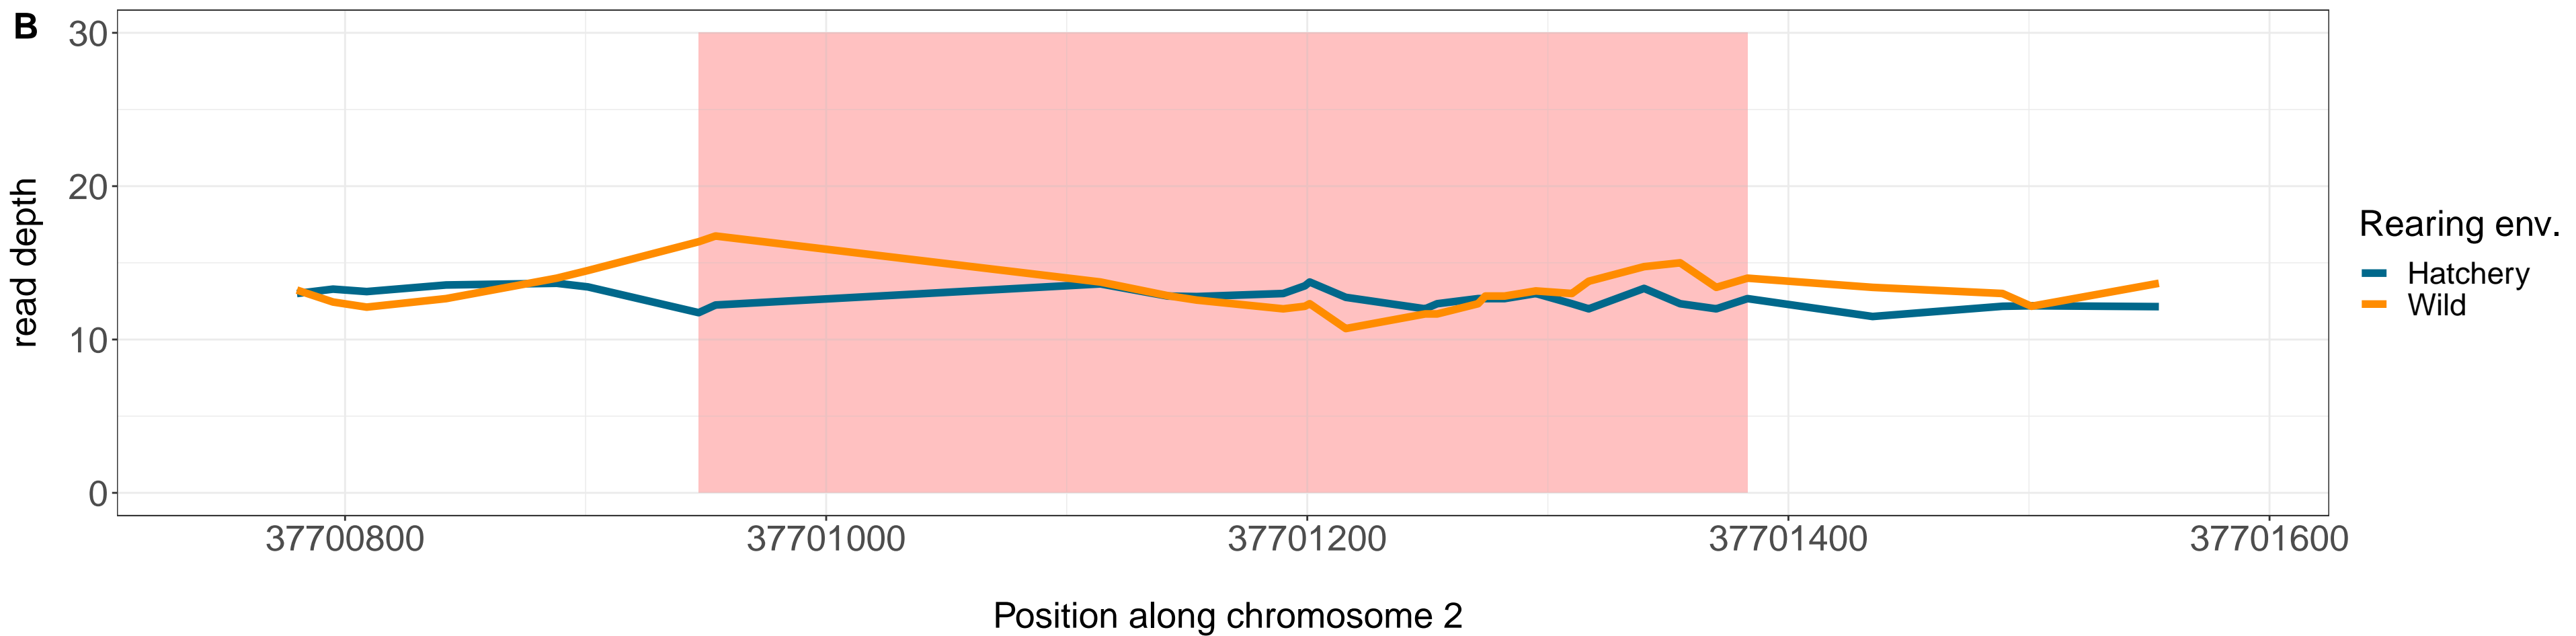

# DMR\_59

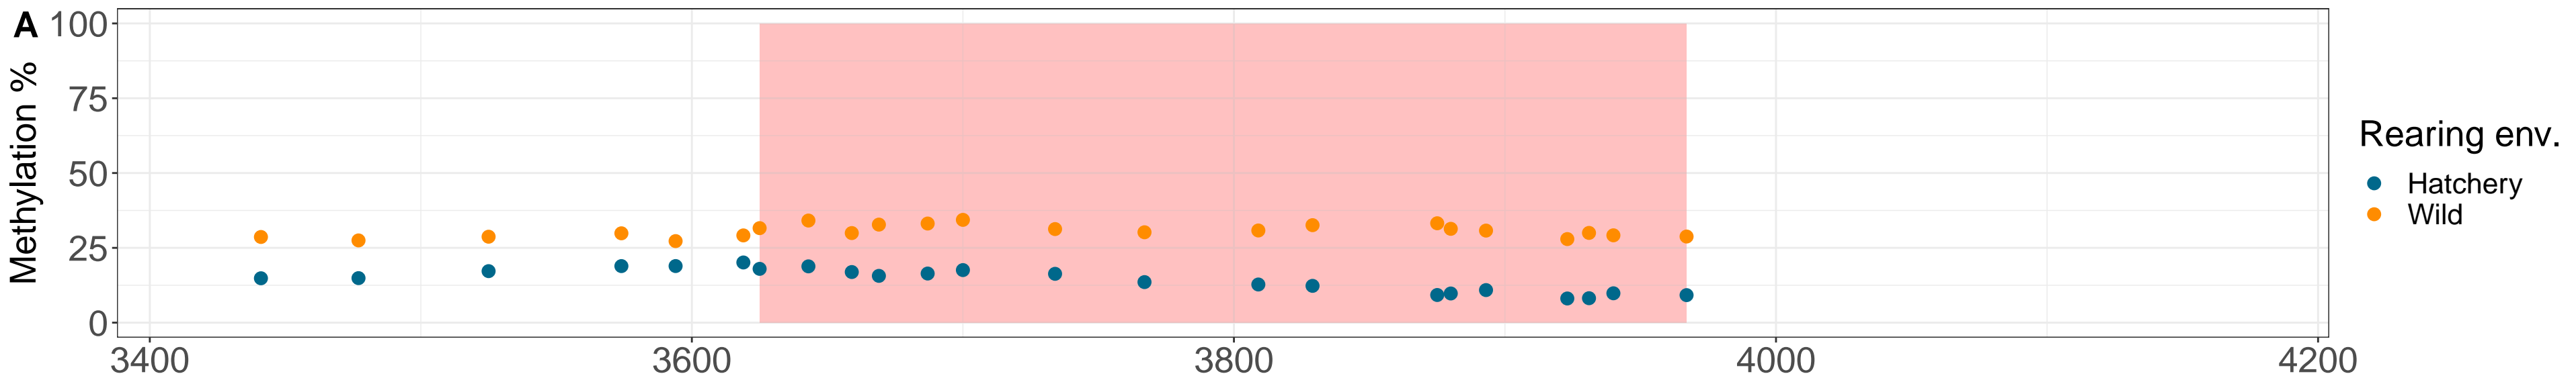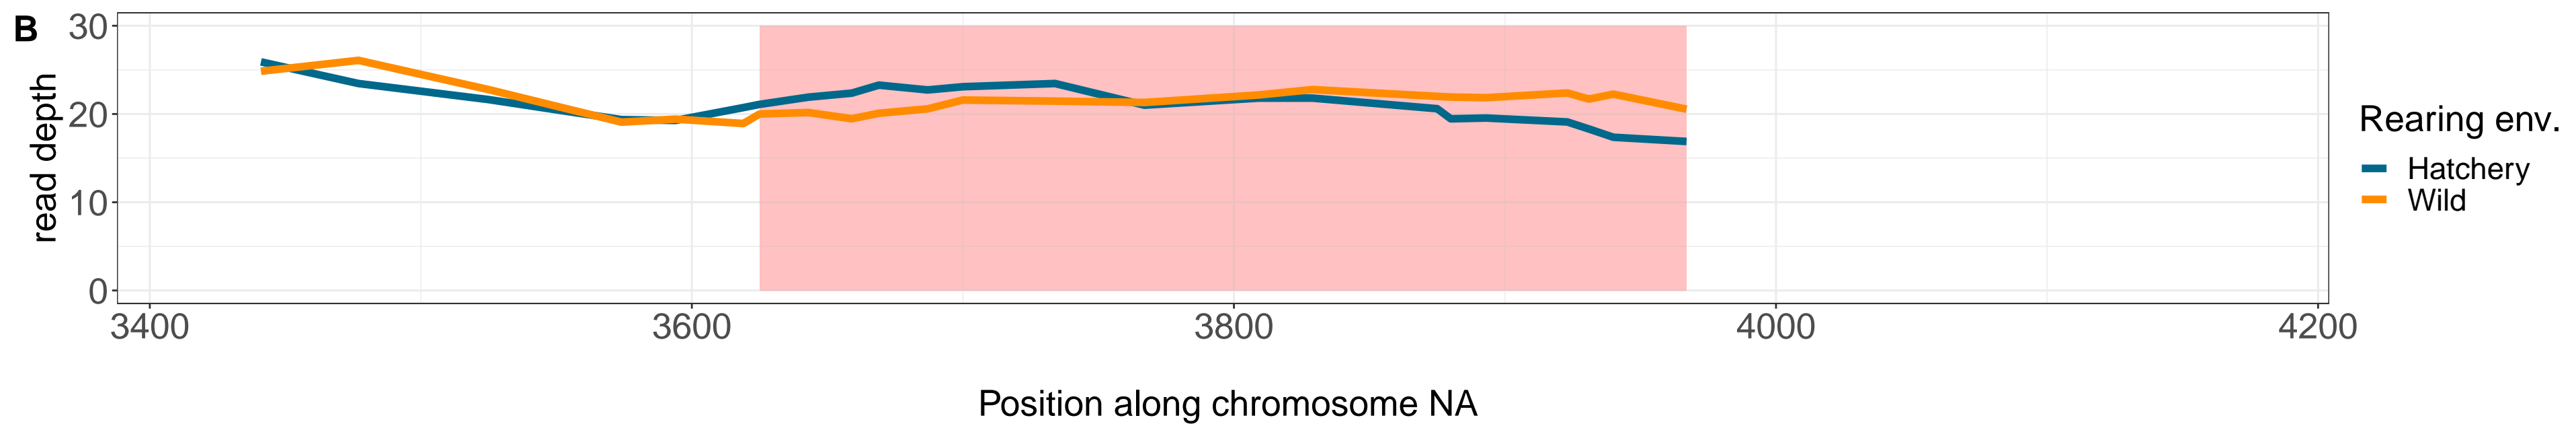

Position along chromosome NA

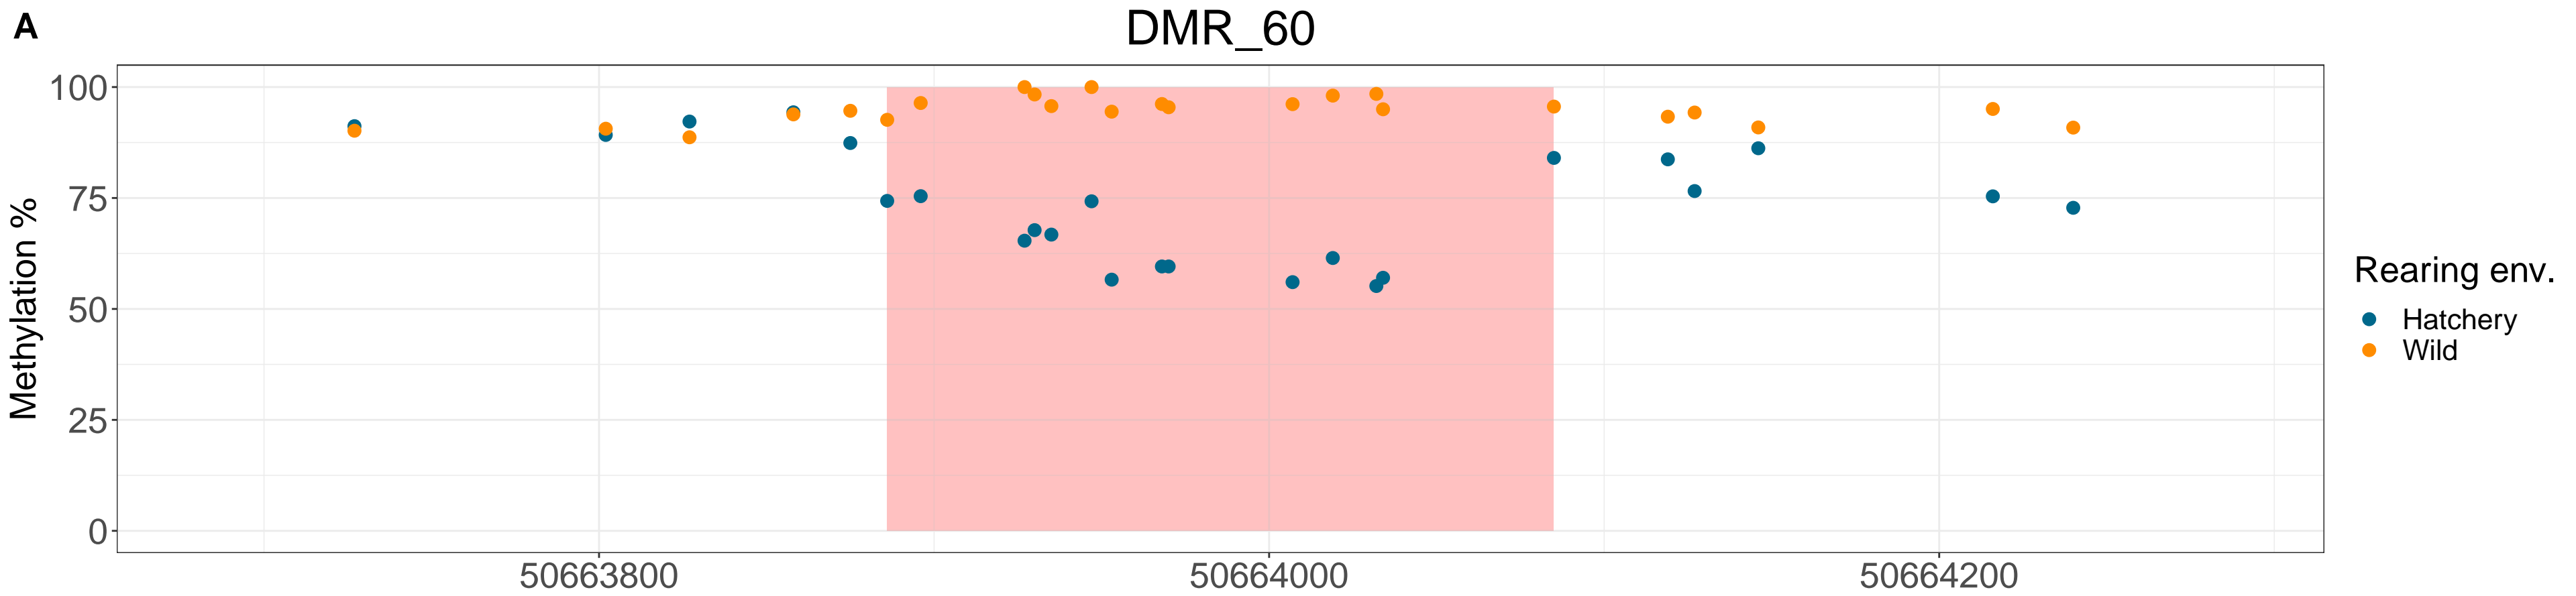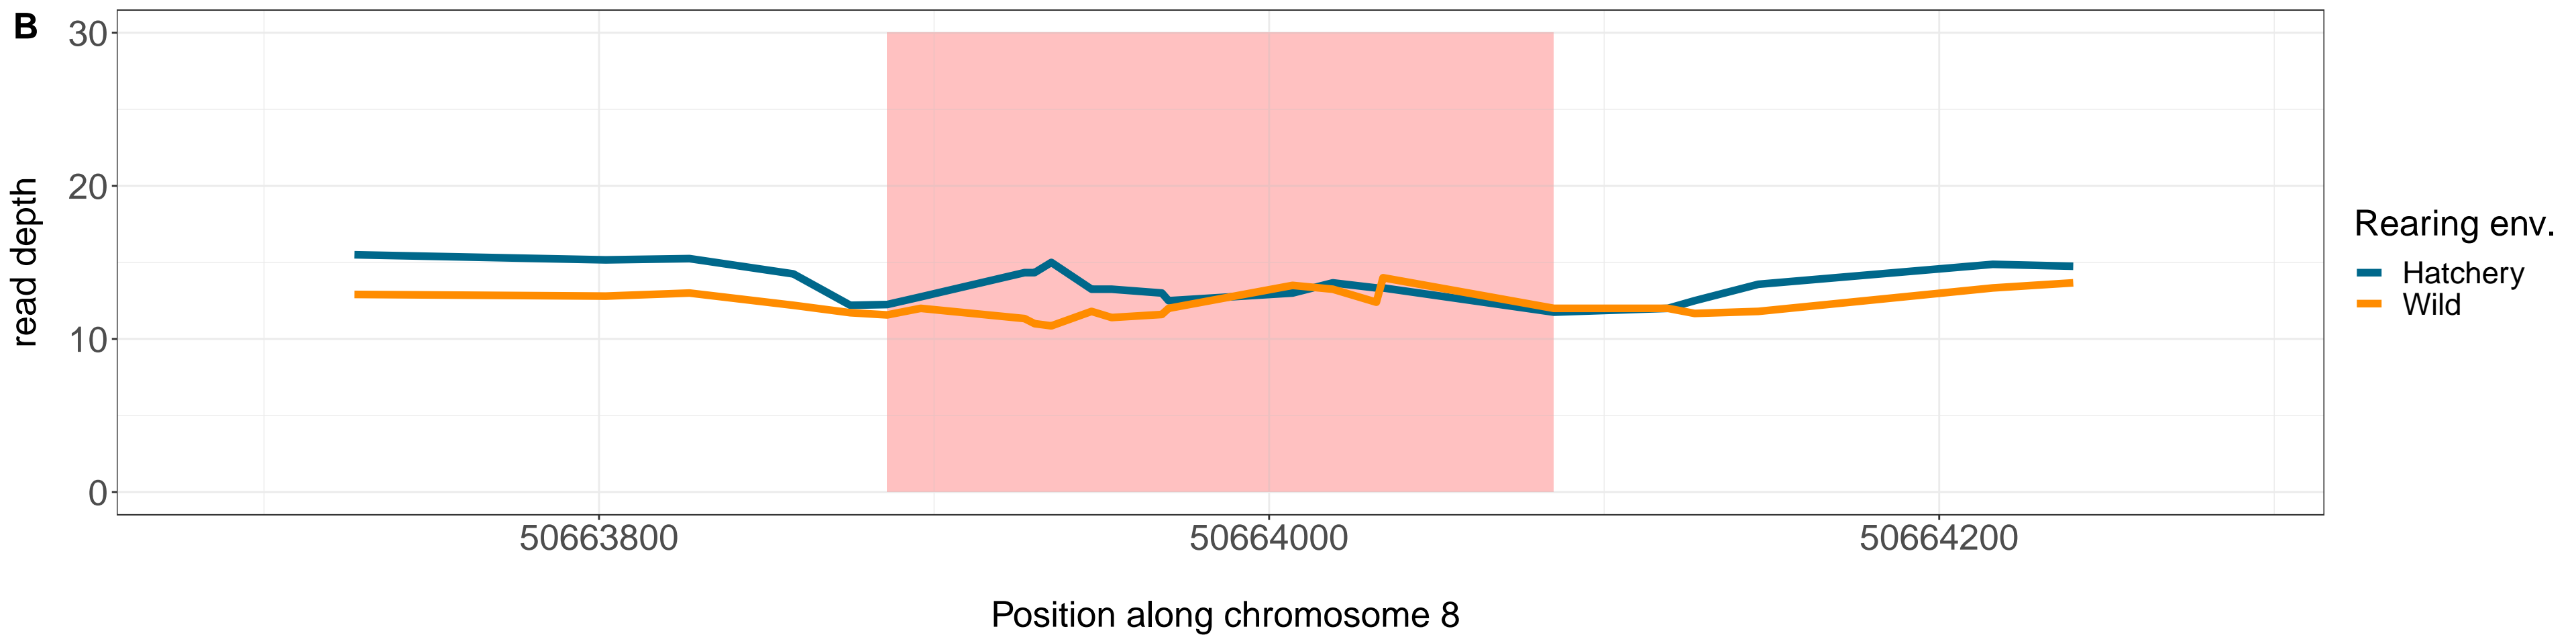

**A**

DMR\_61

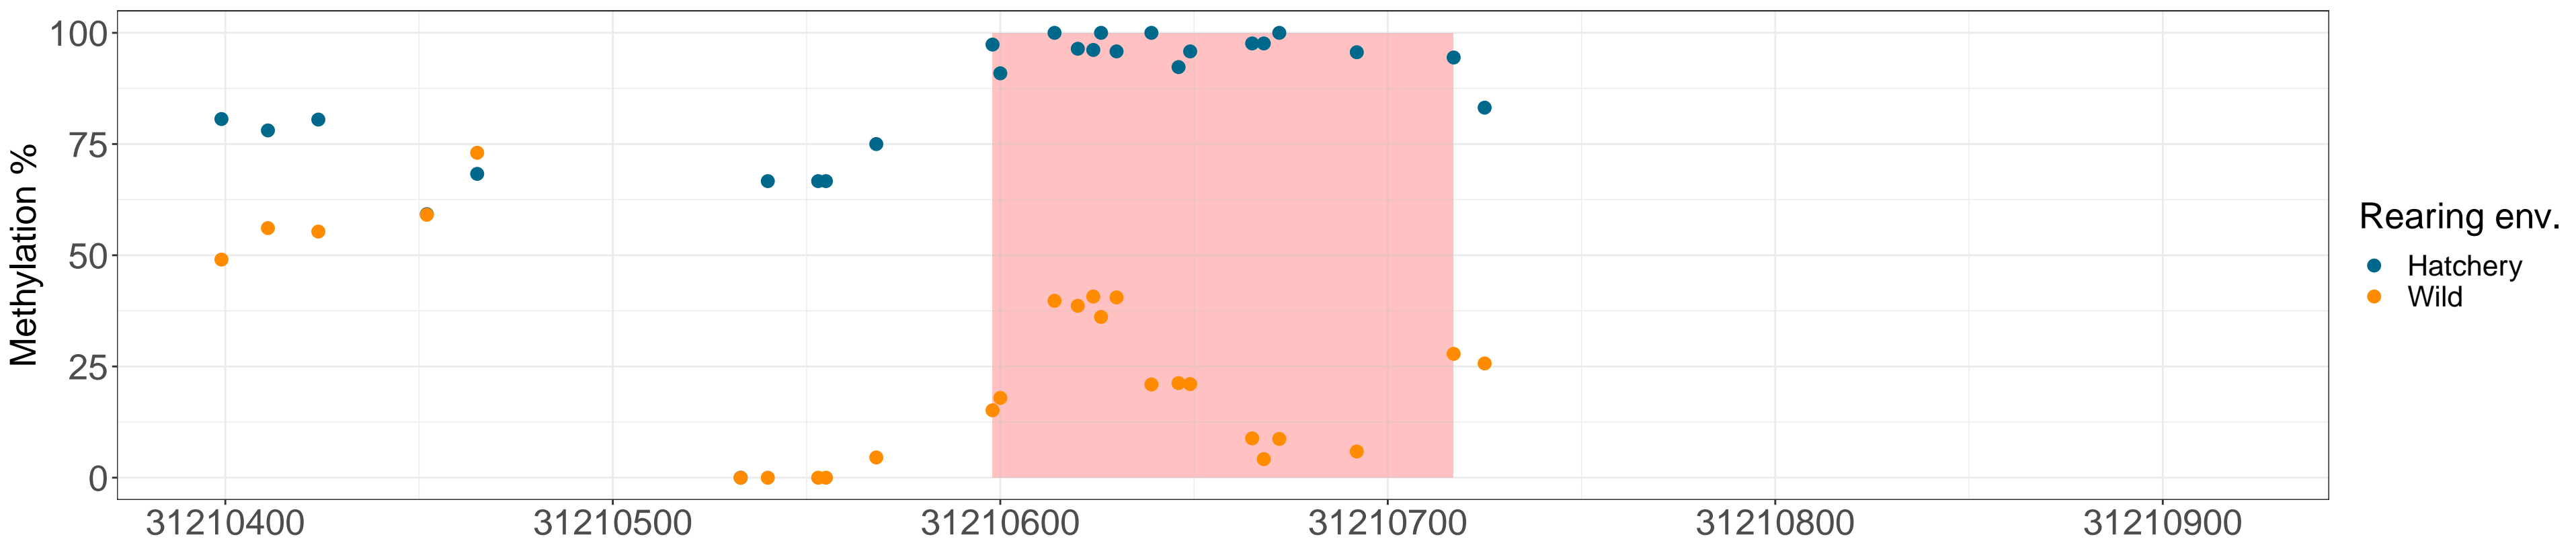**B**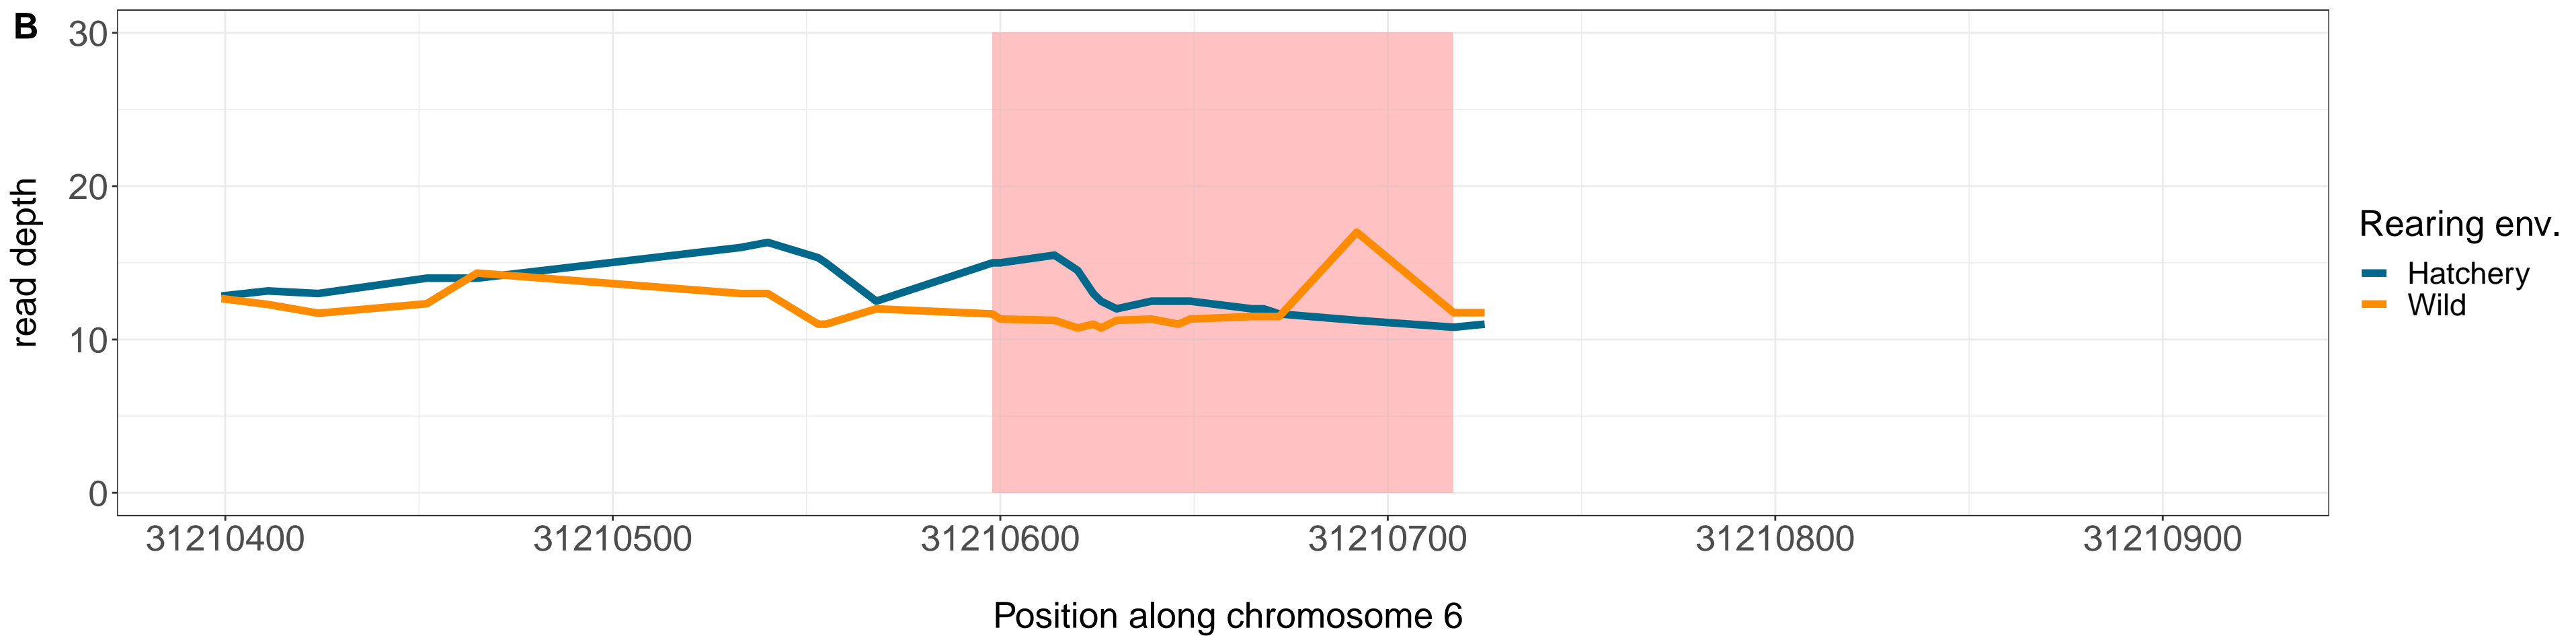

# DMR\_62

XM\_020474921.1

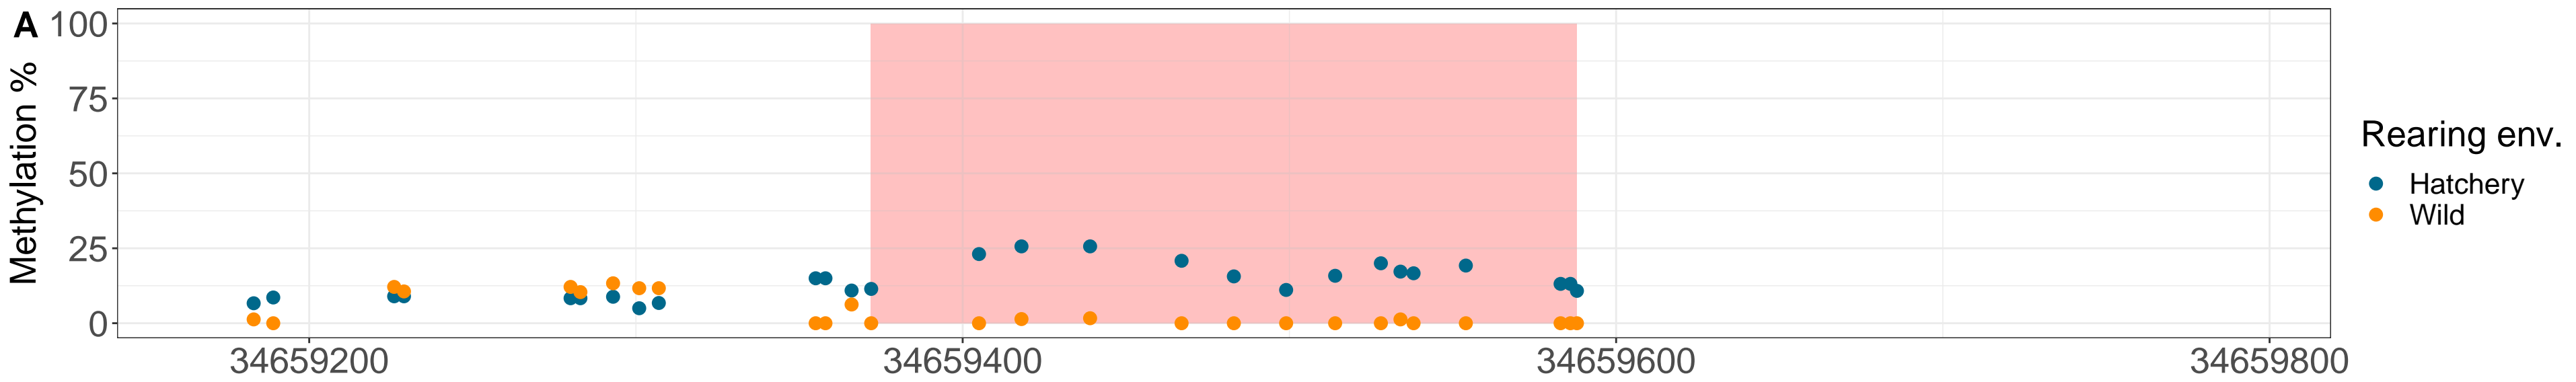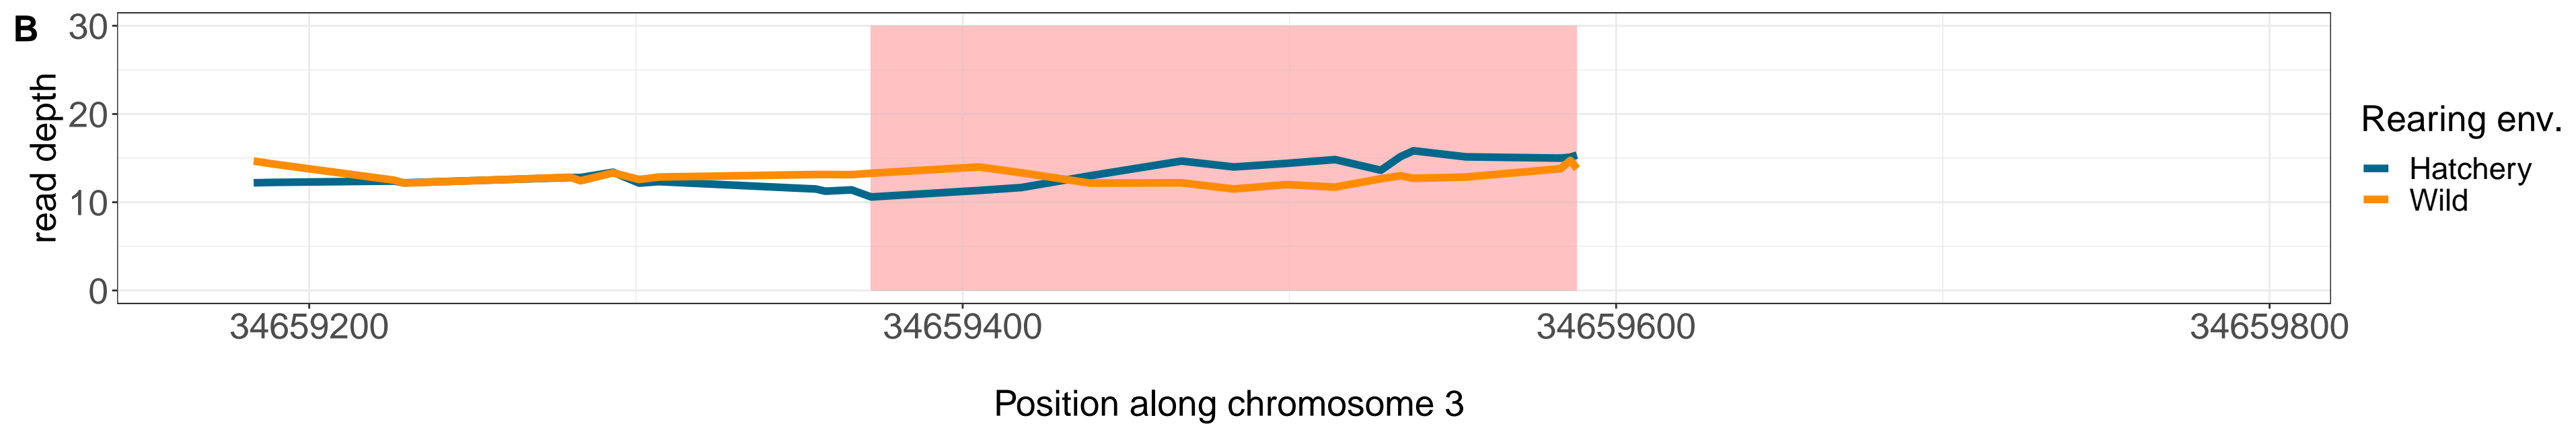

**A**

## DMR\_63

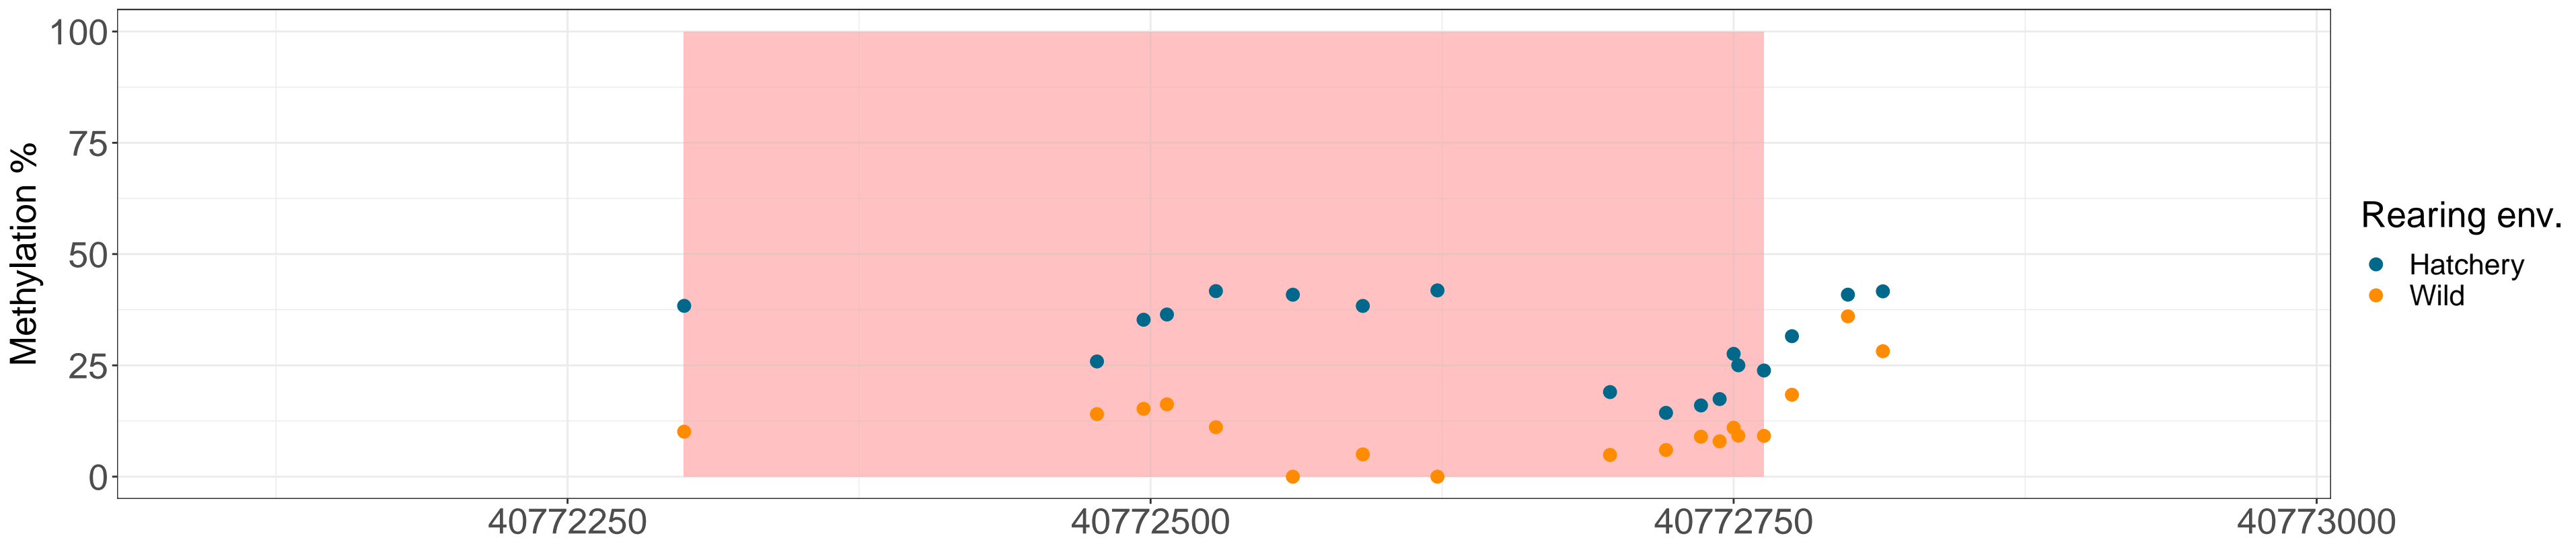**B**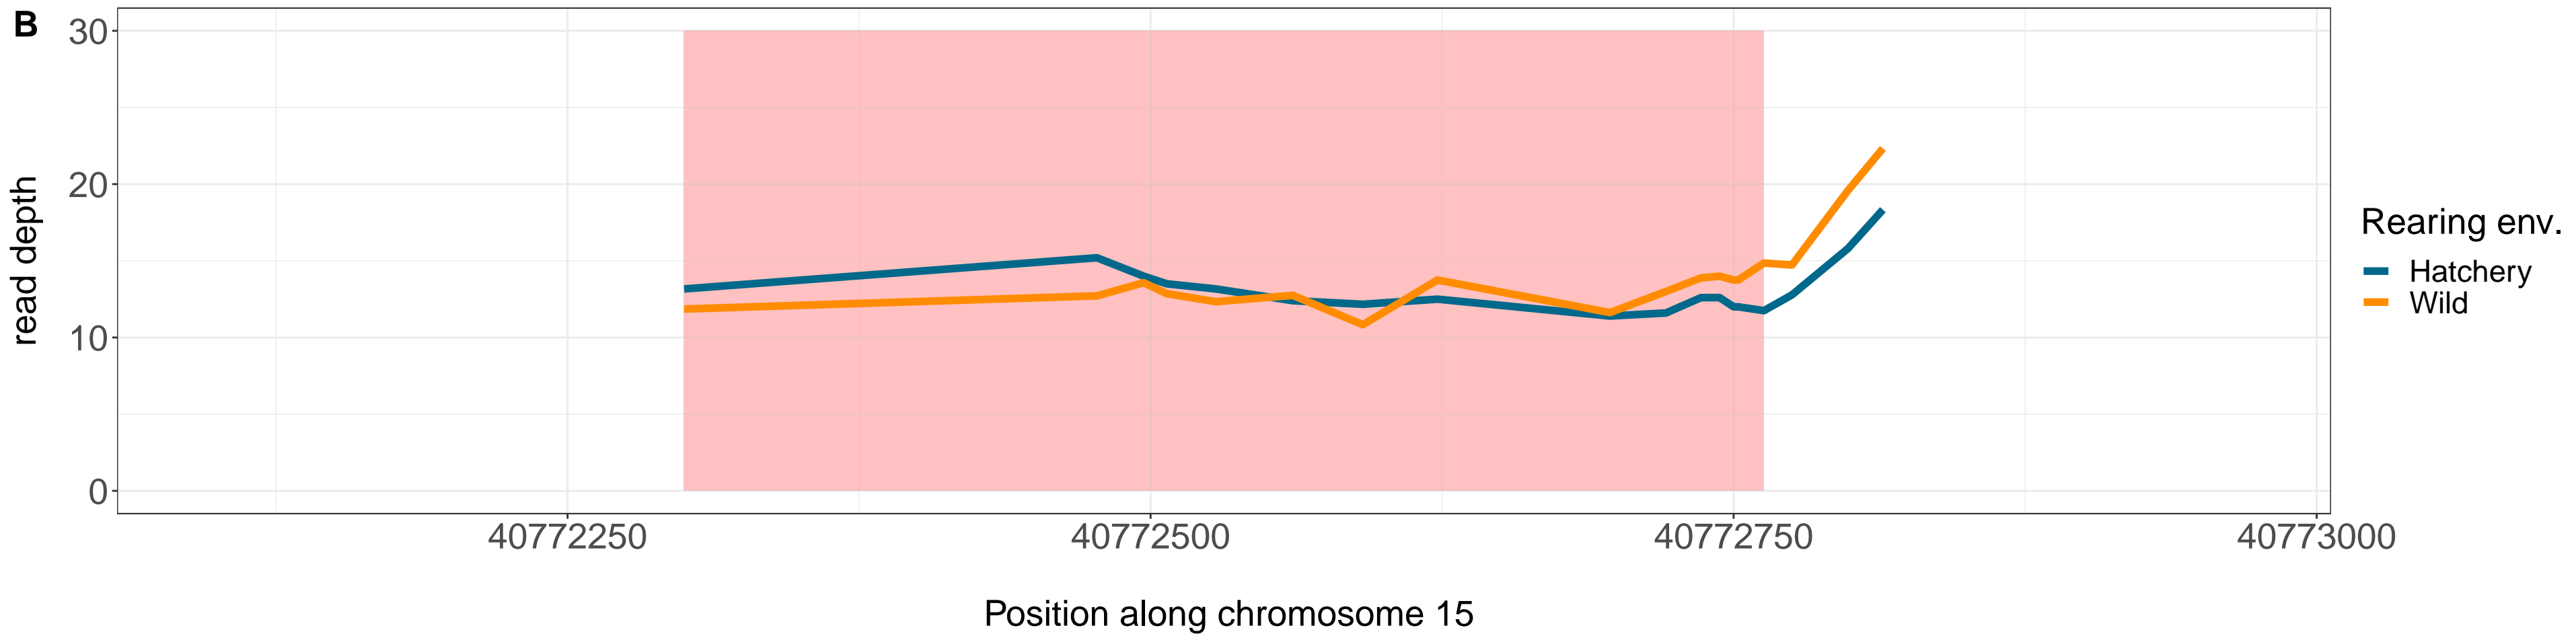

**A**

DMR\_64

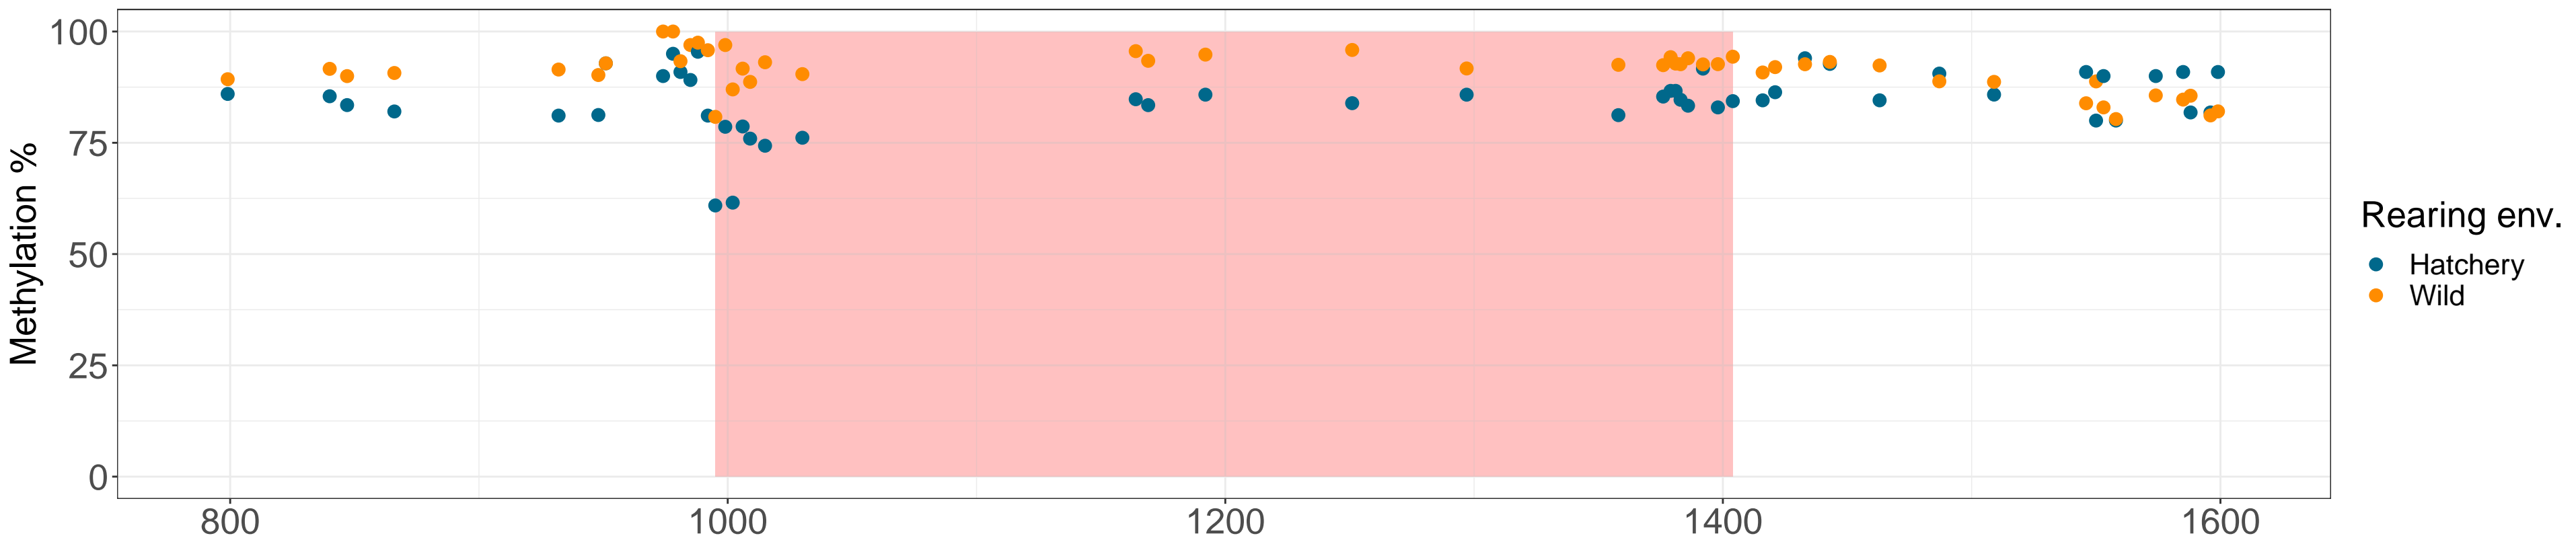**B**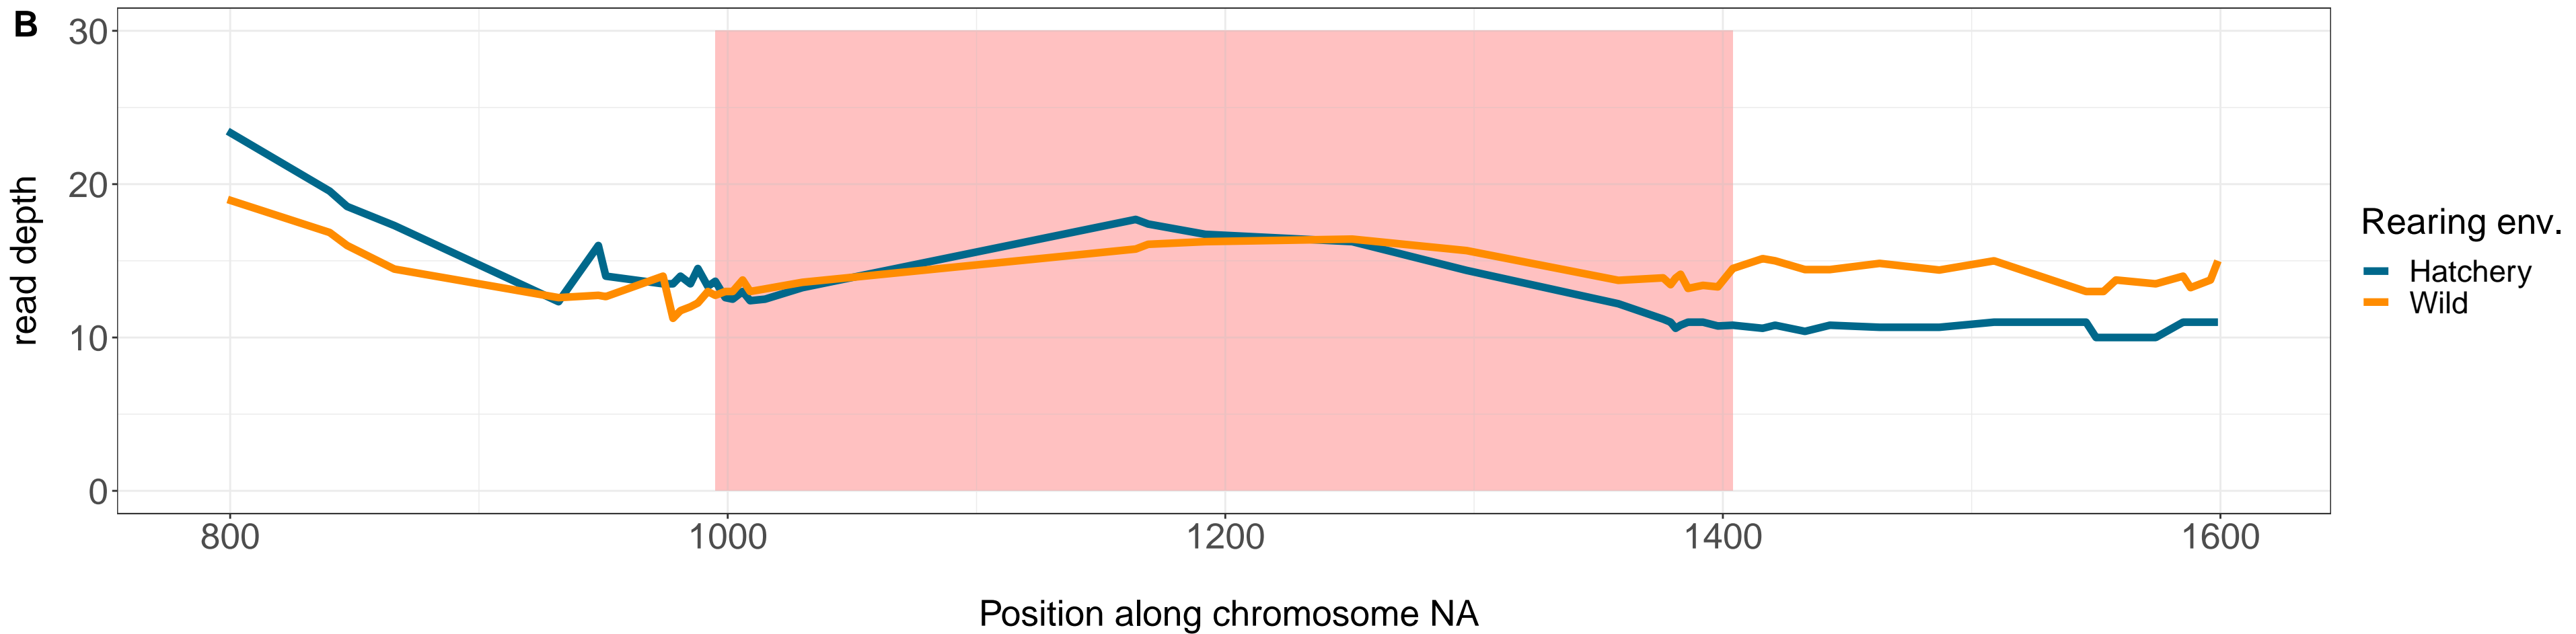

# DMR\_65

XM\_020497407.1

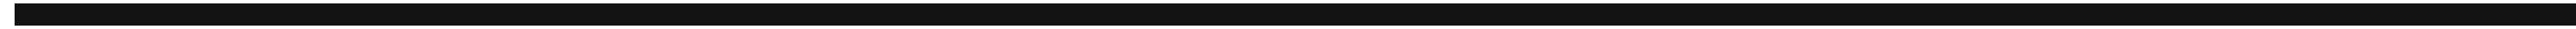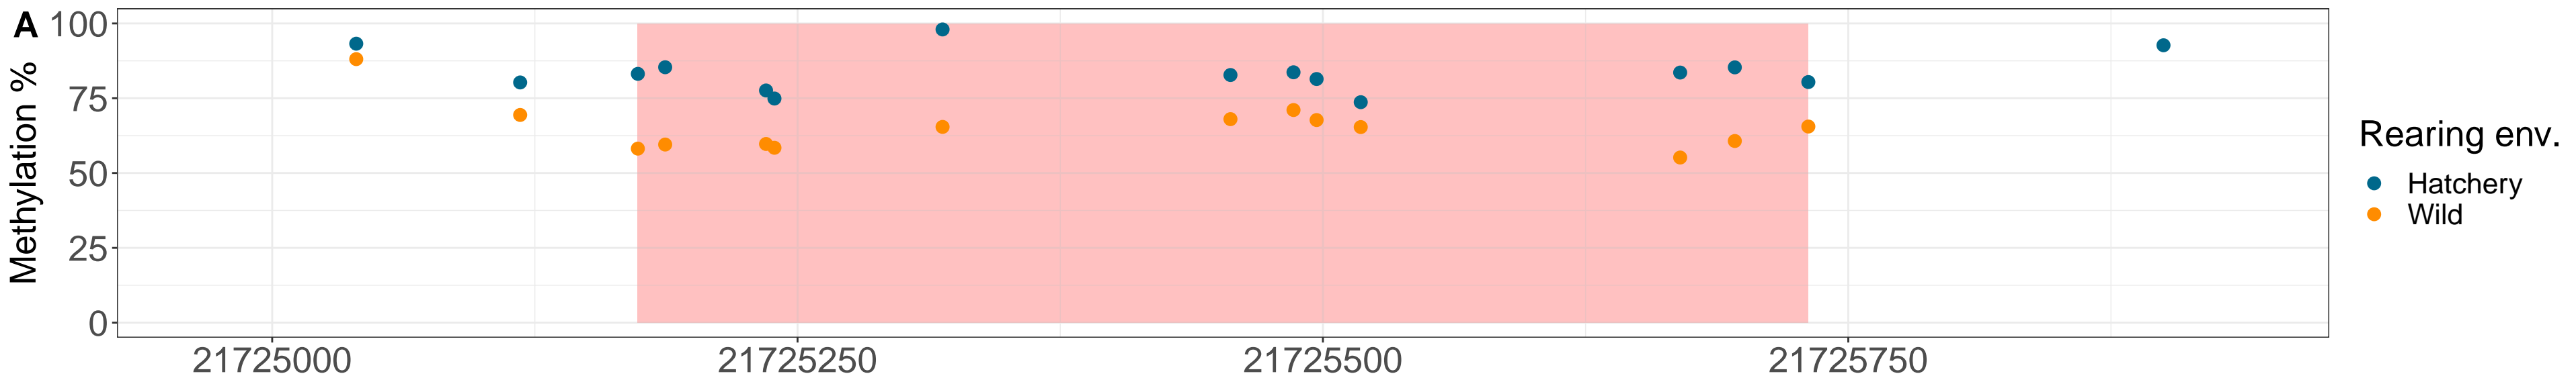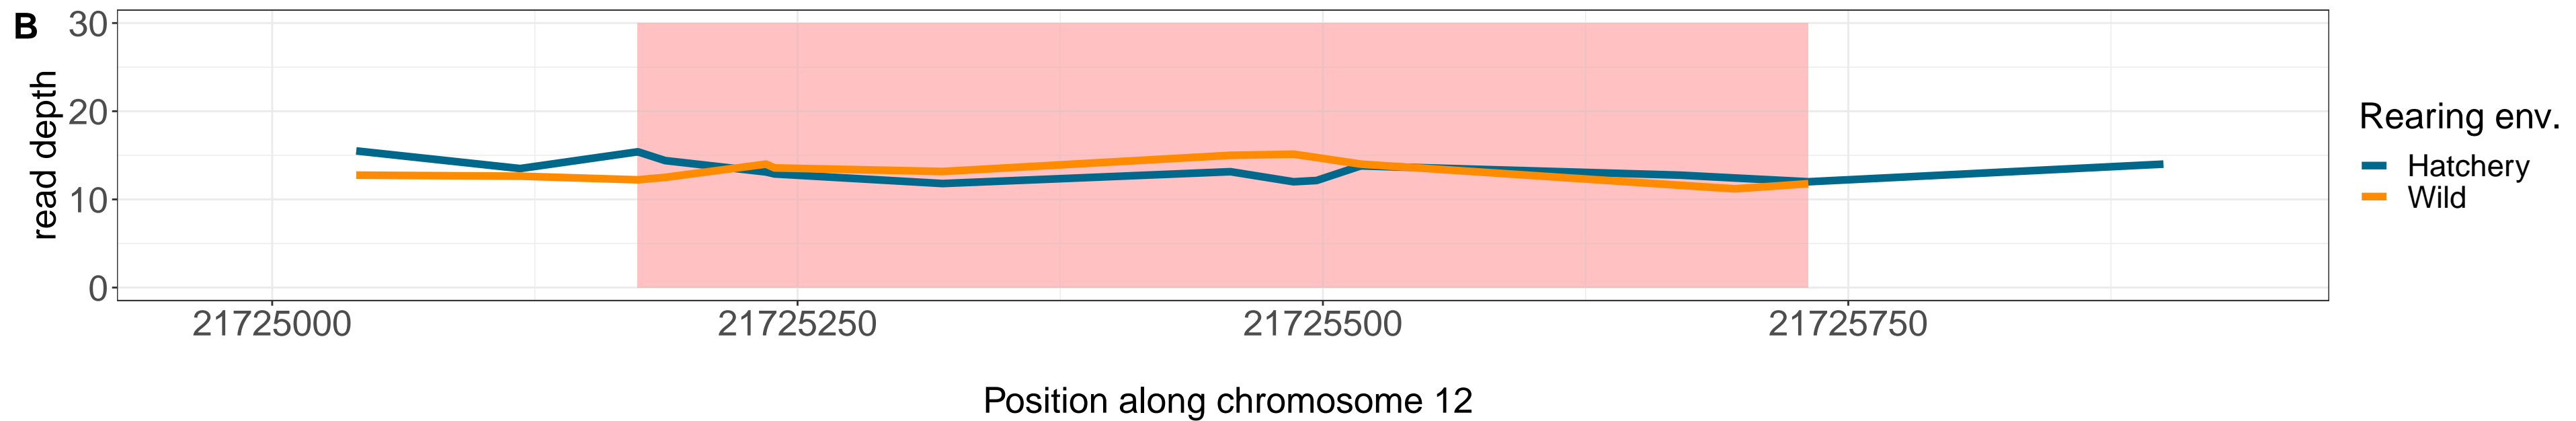

Position along chromosome 12



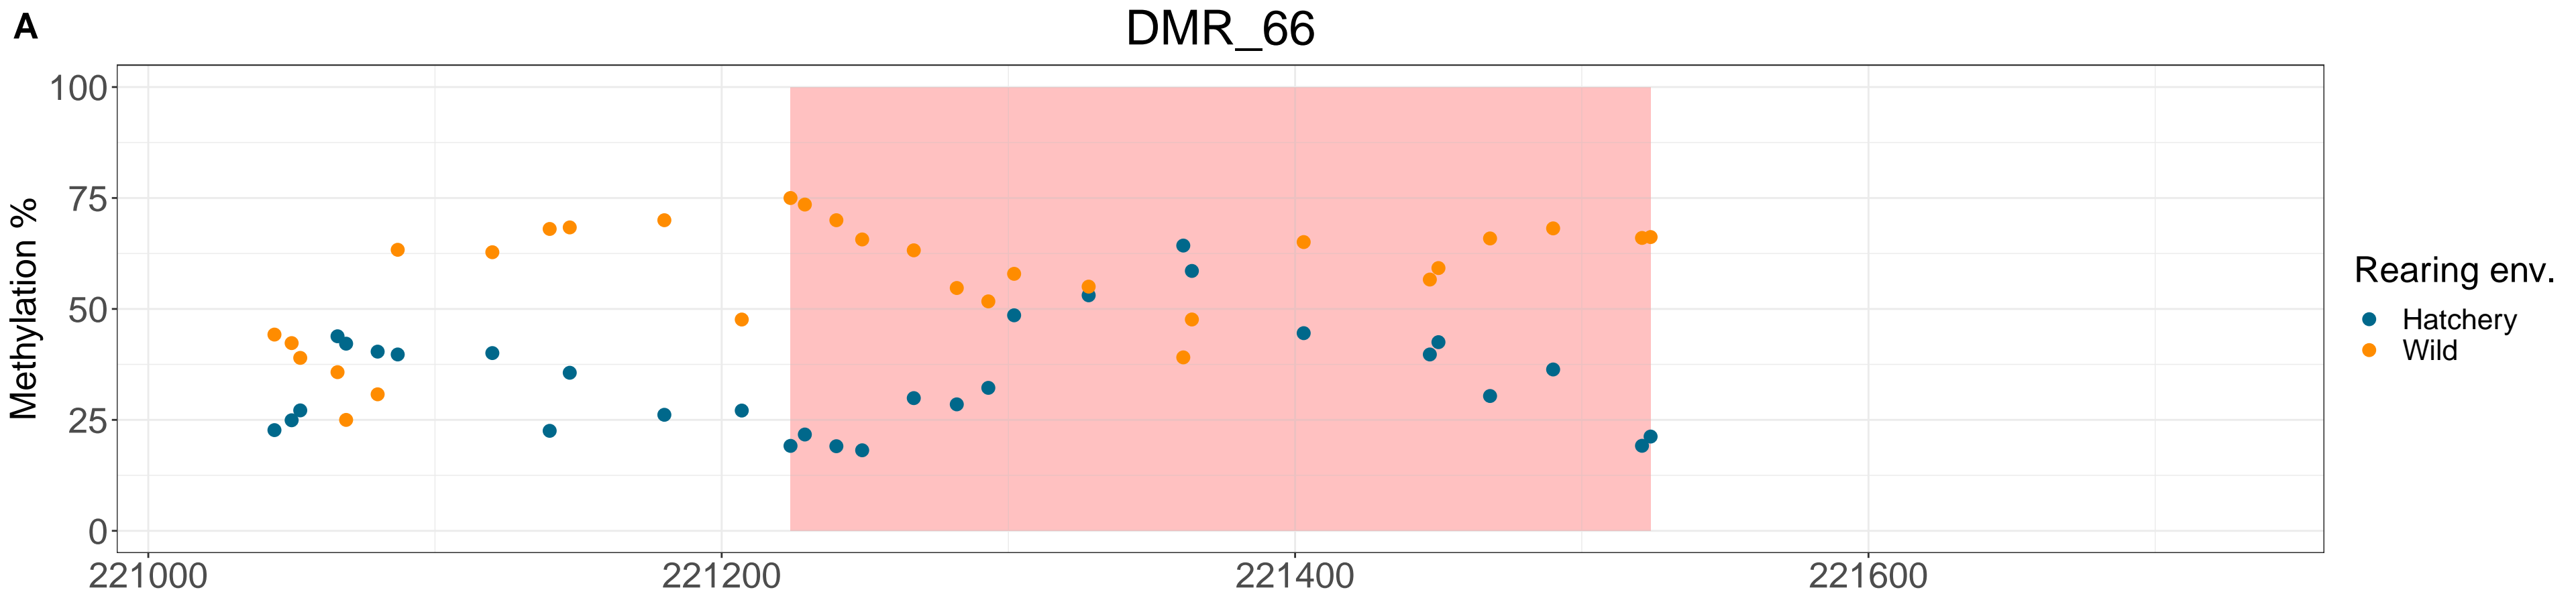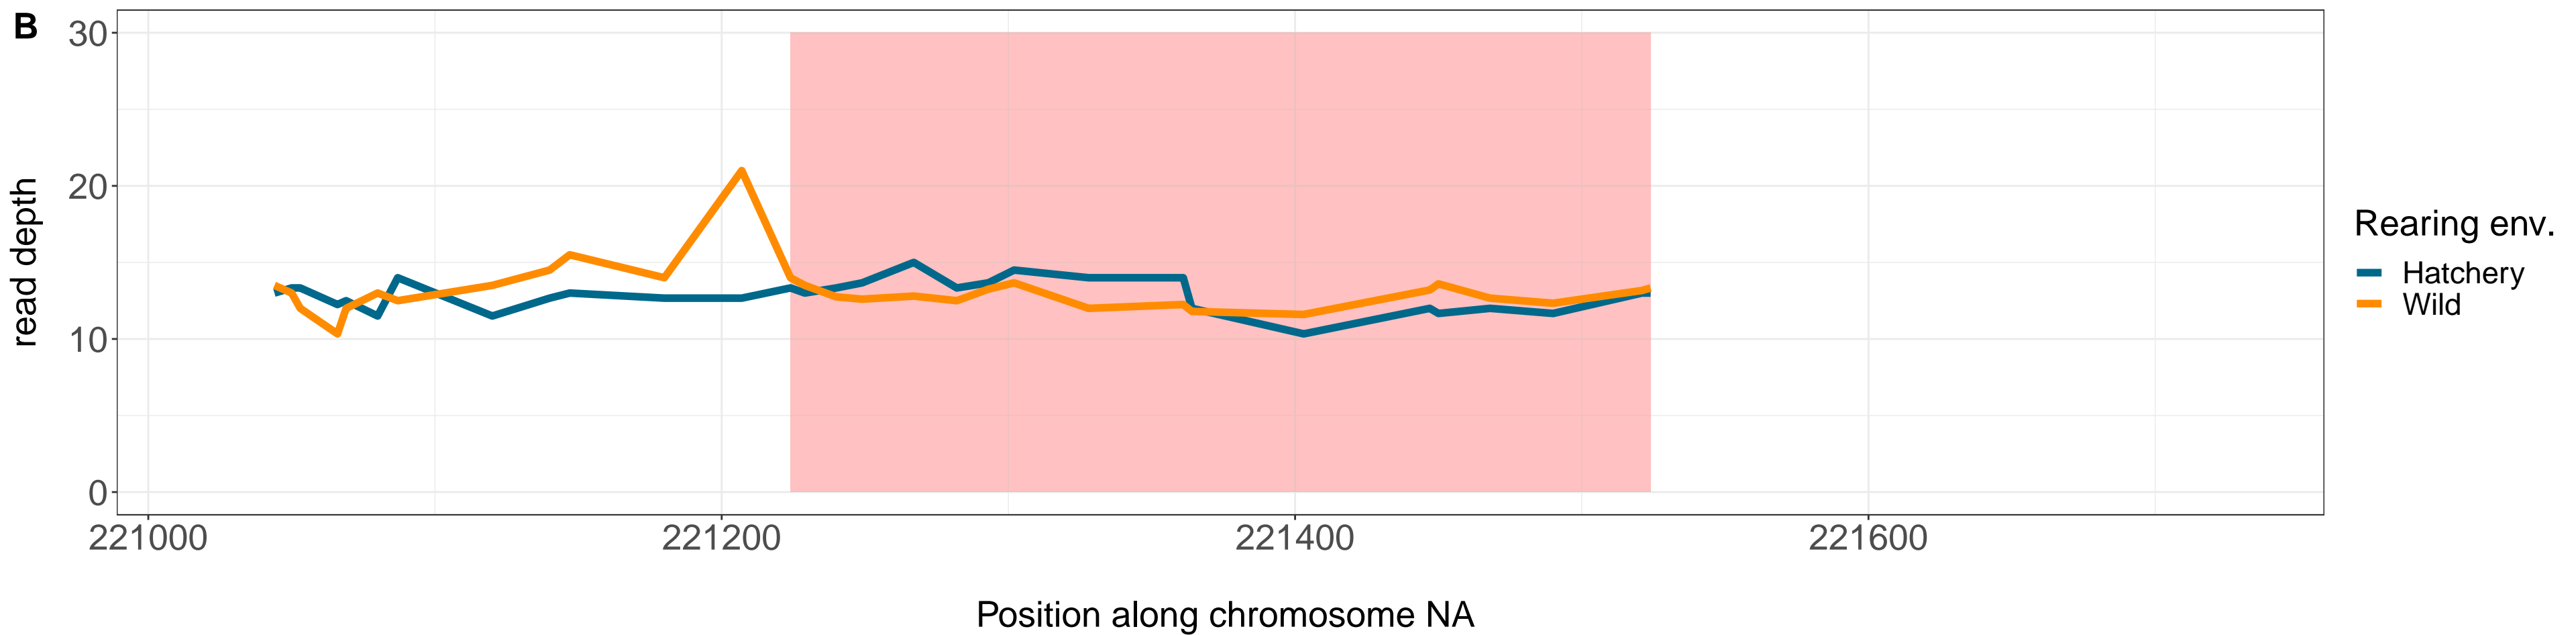

**A**

DMR\_67

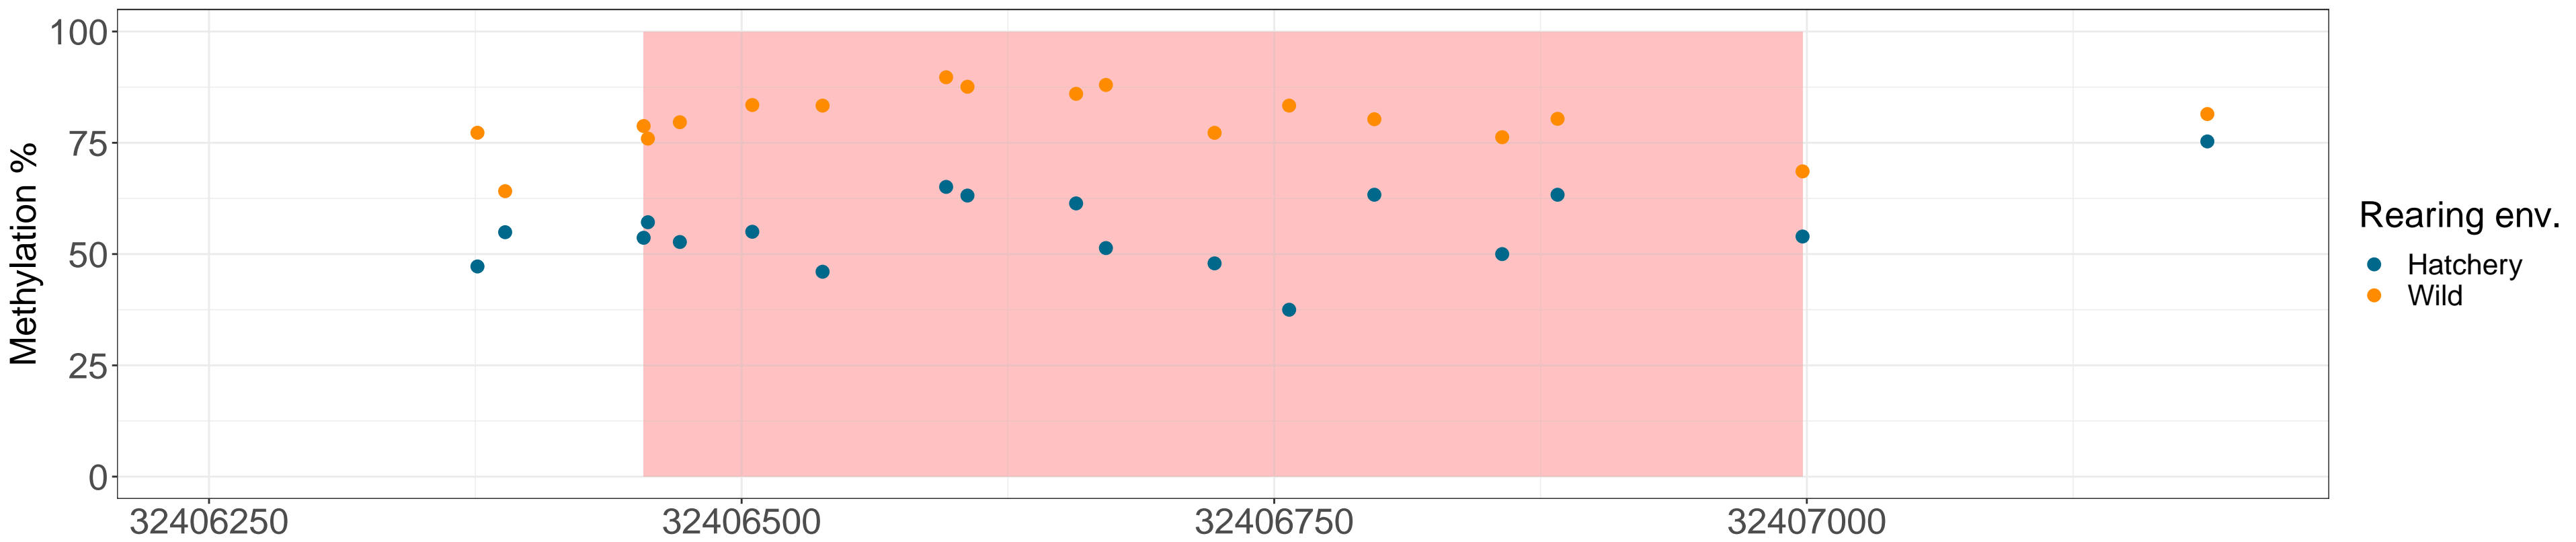**B**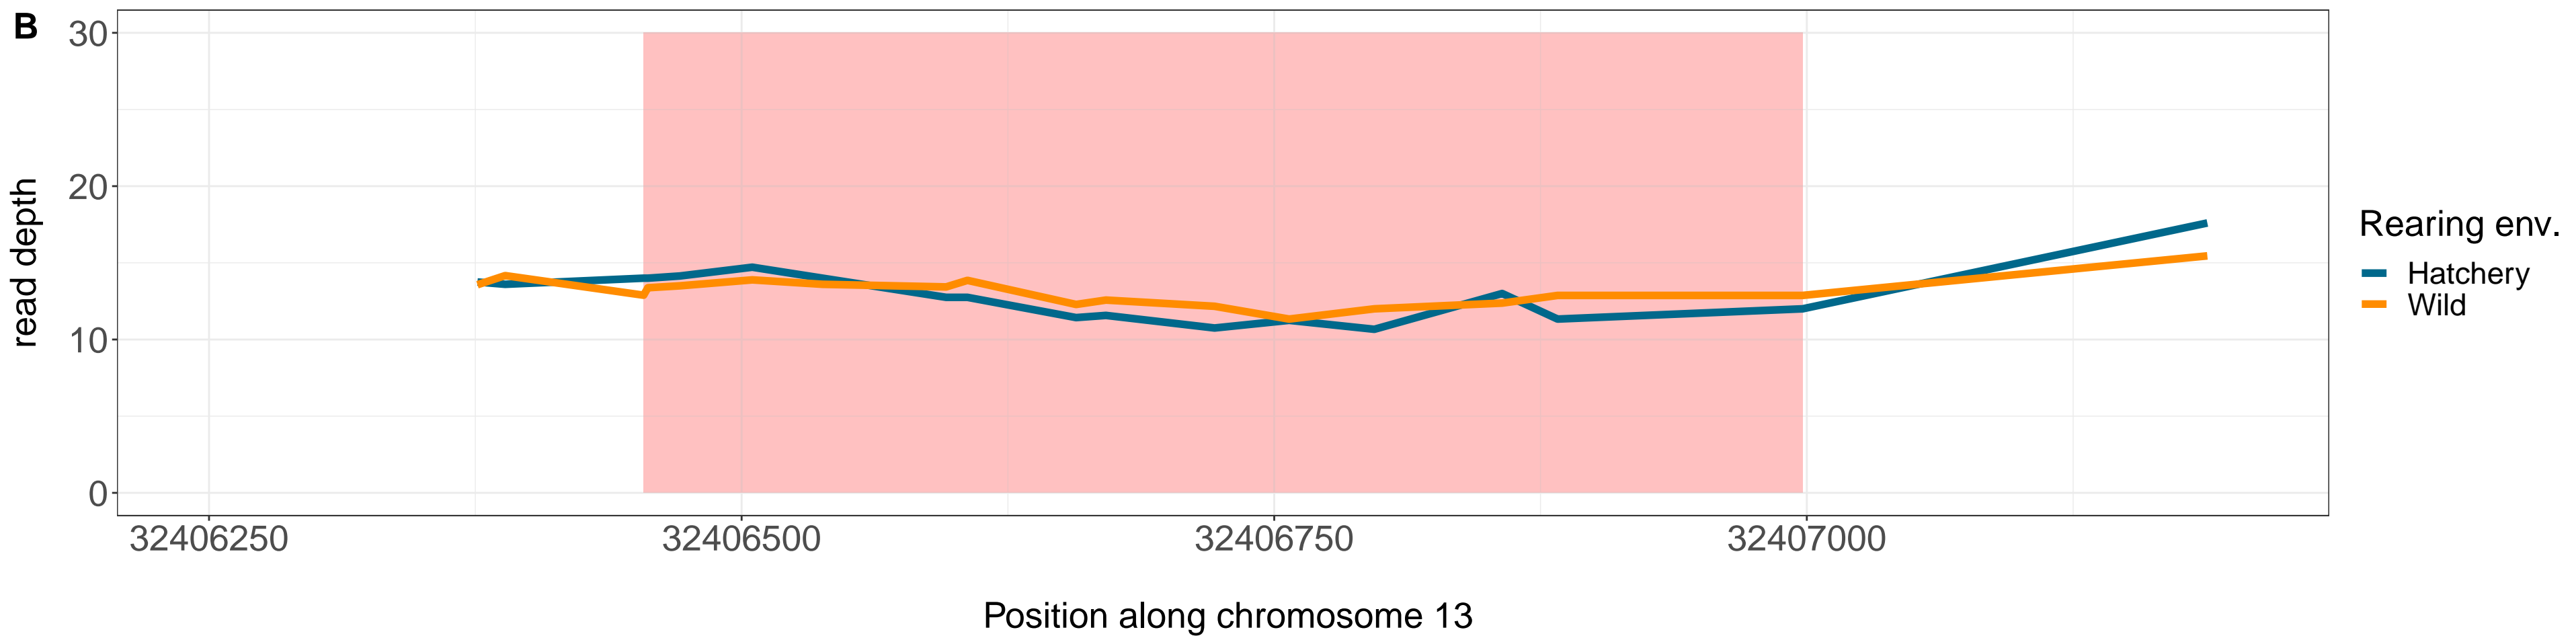

**A**

## DMR\_68

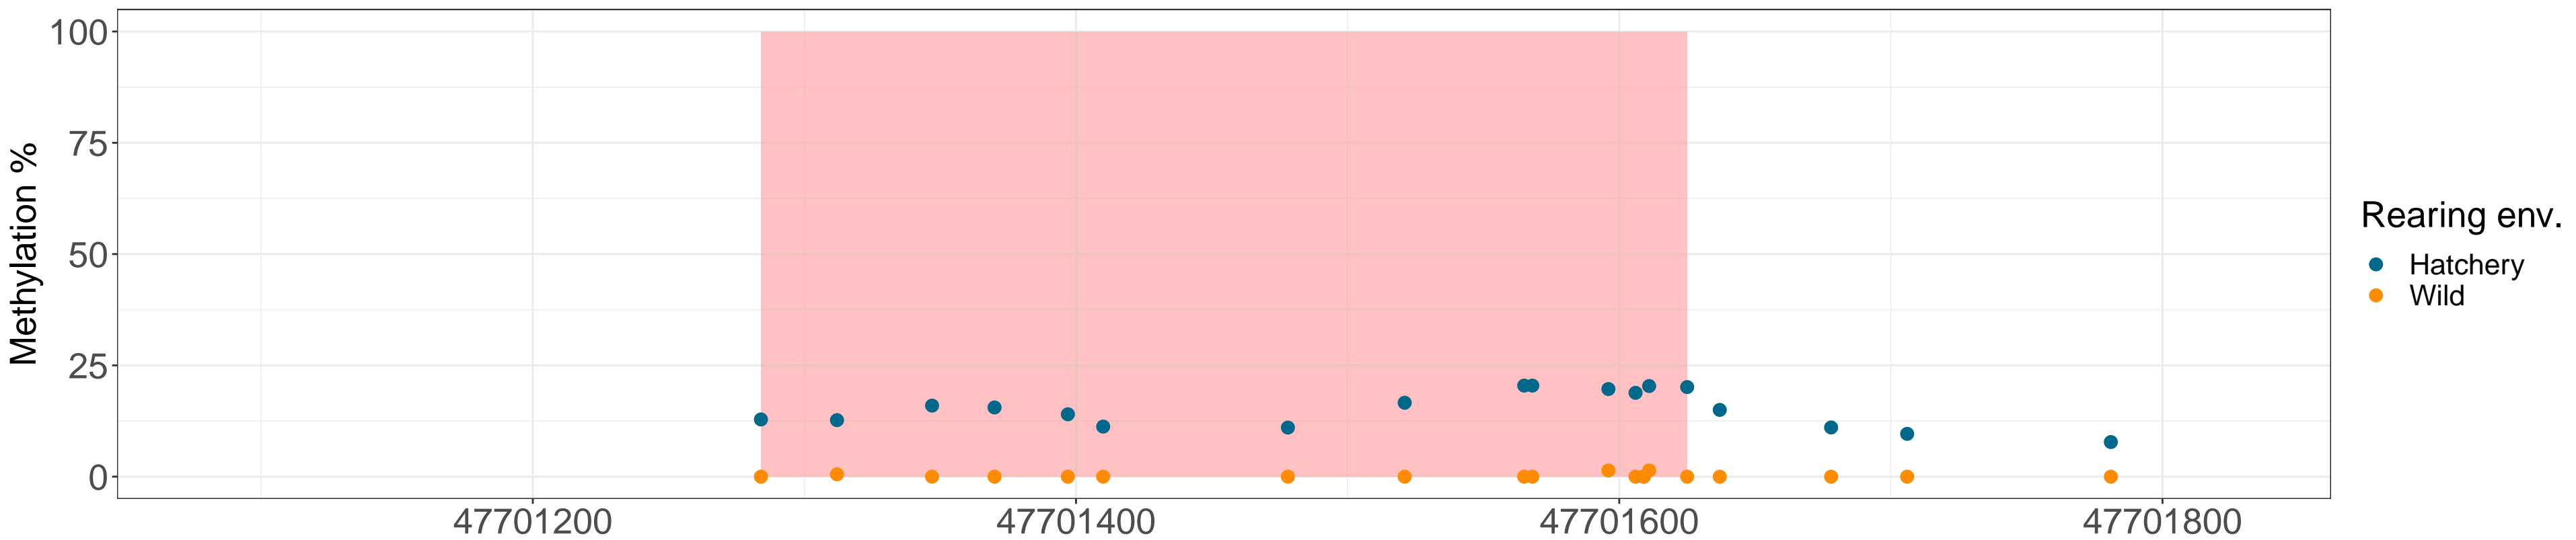**B**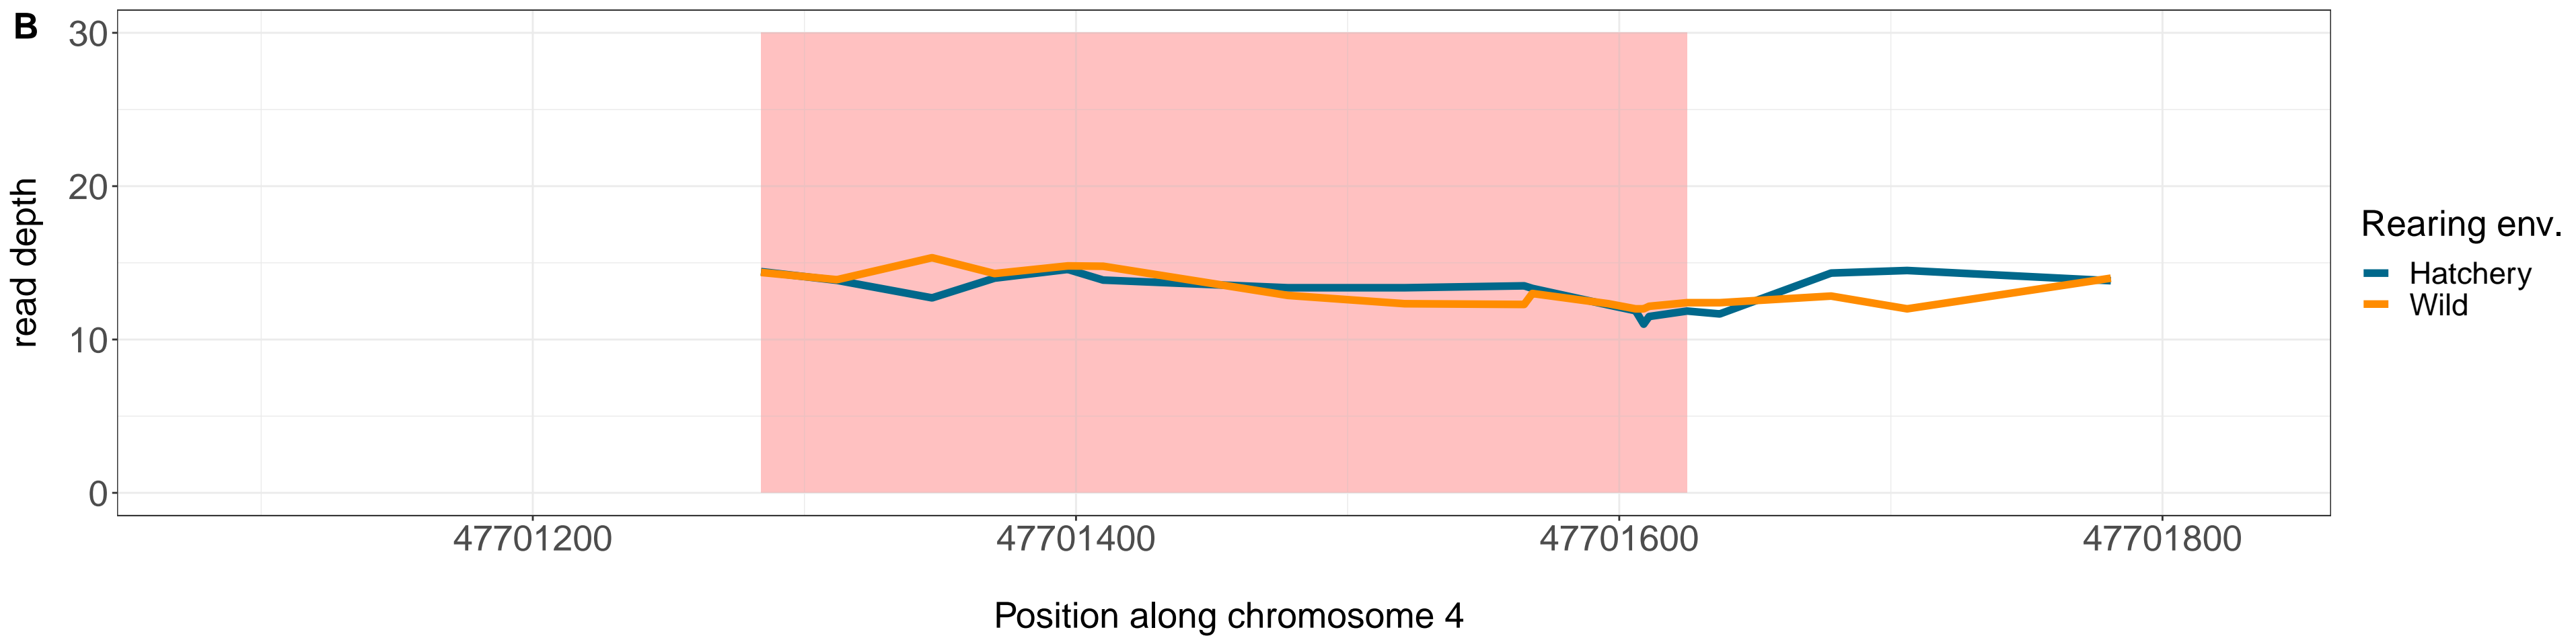

# DMR\_69

XM\_020484051.1

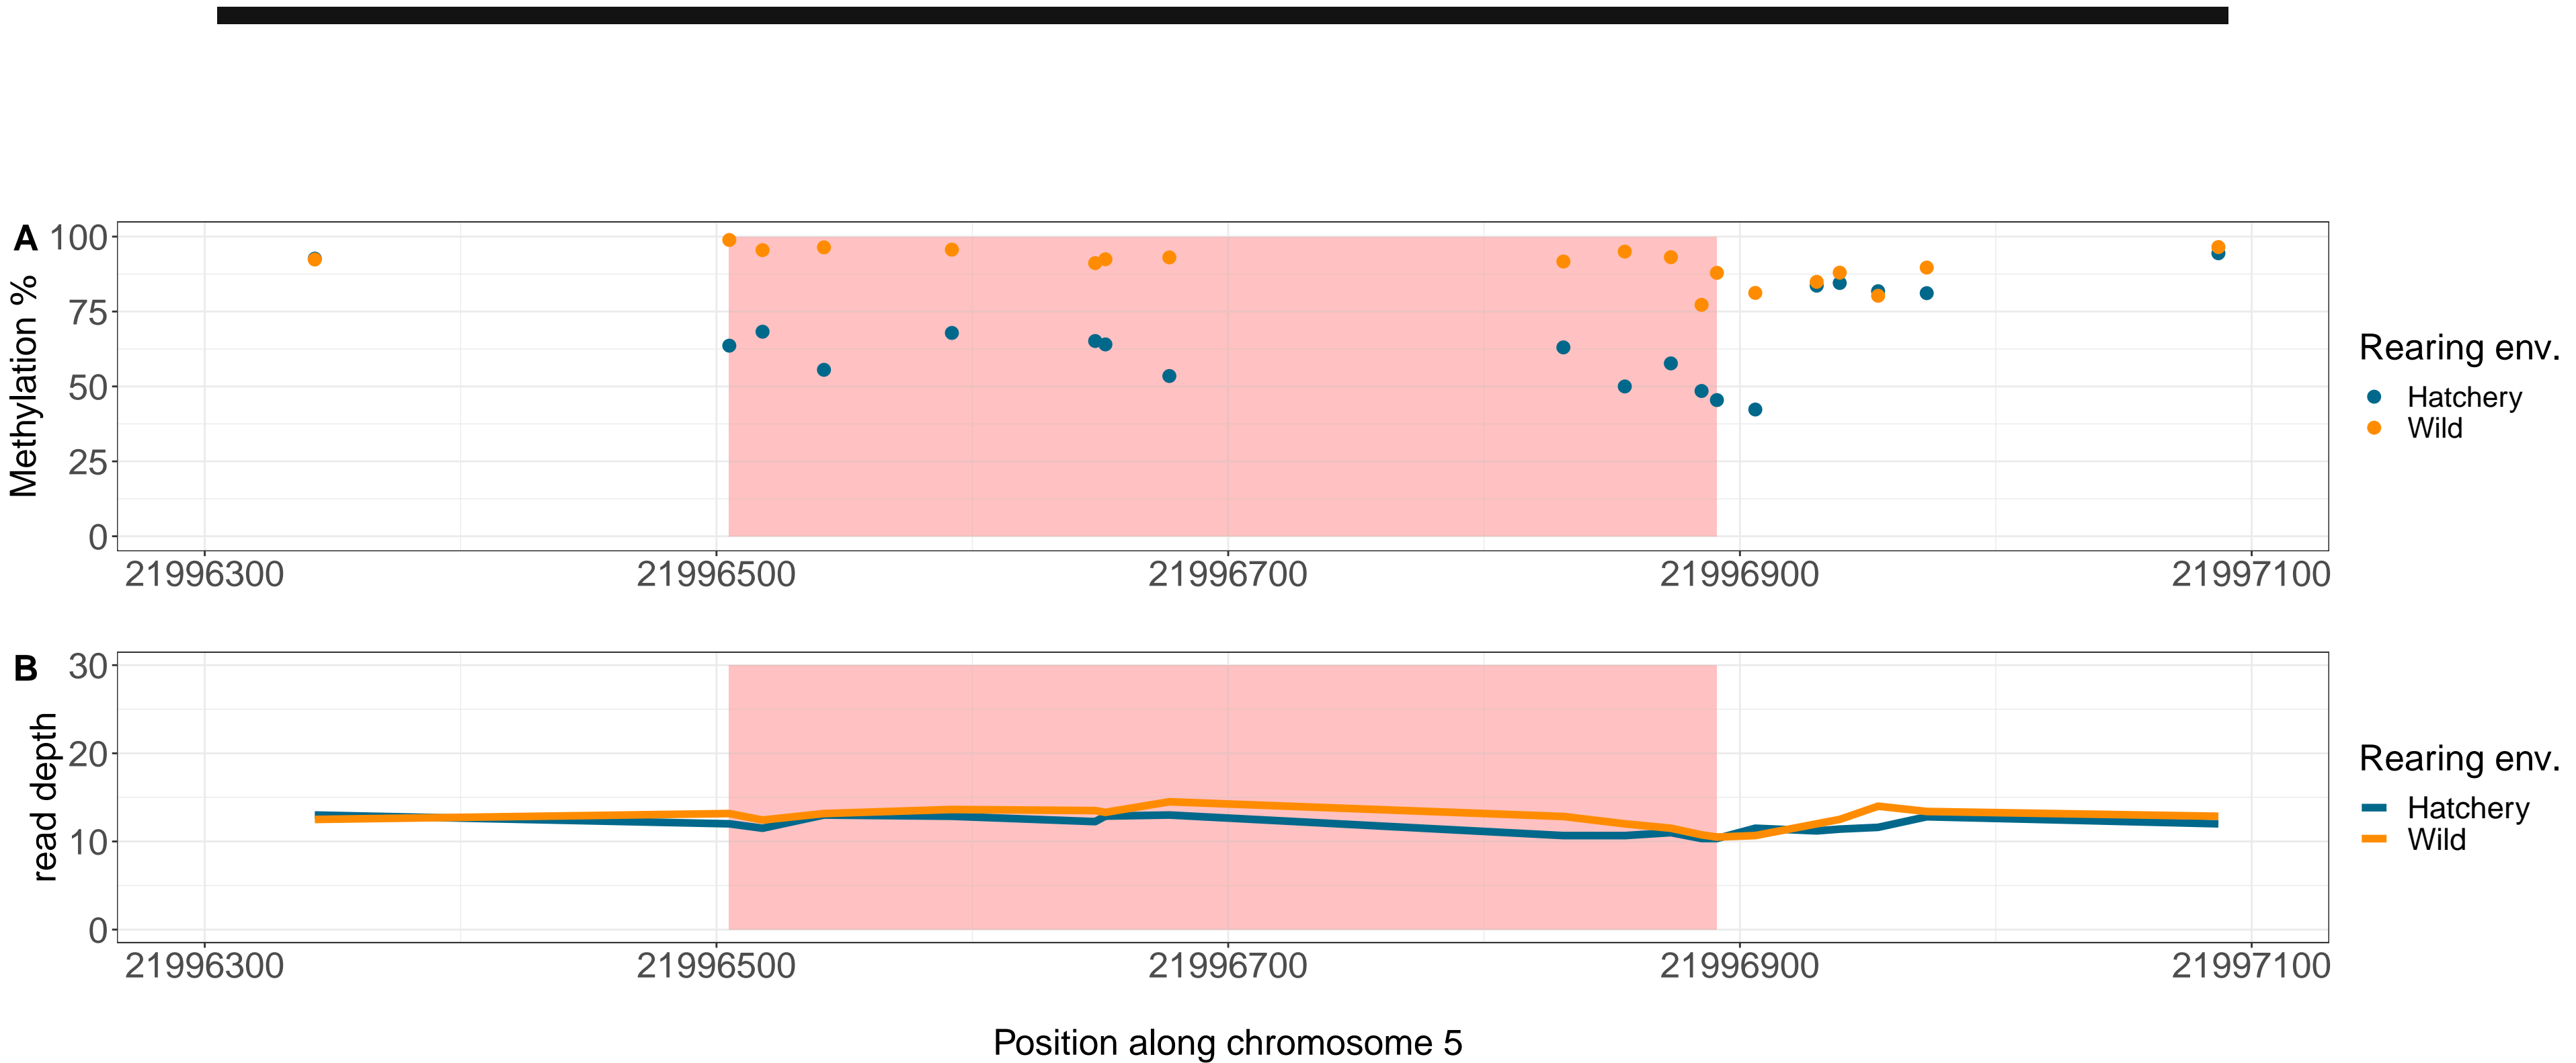

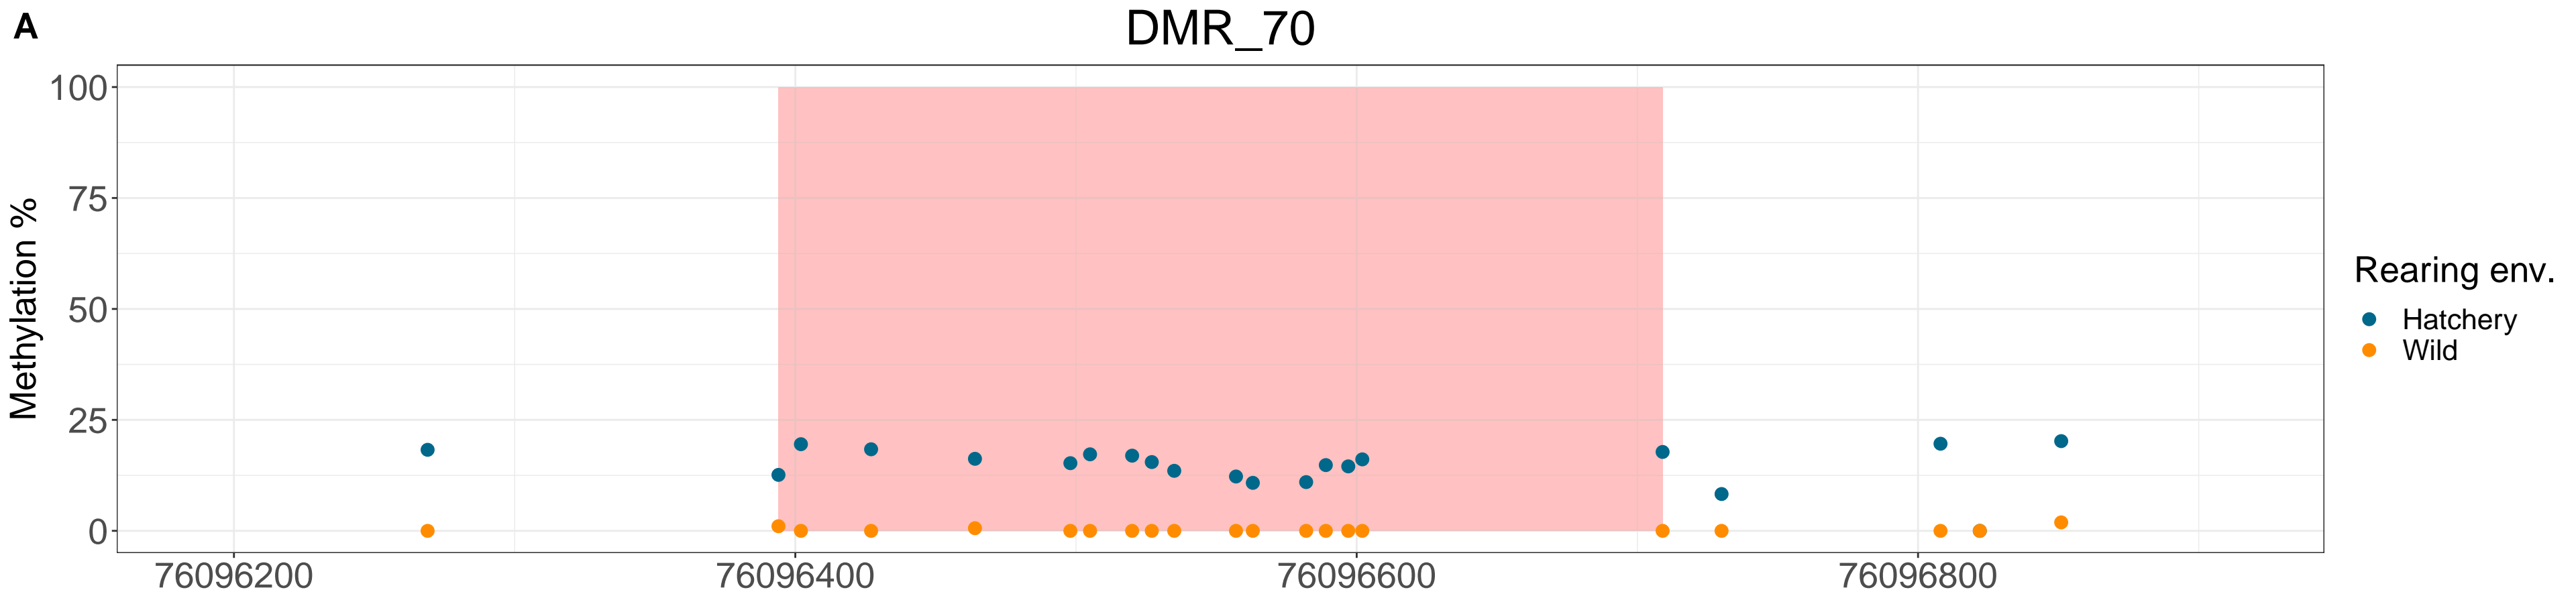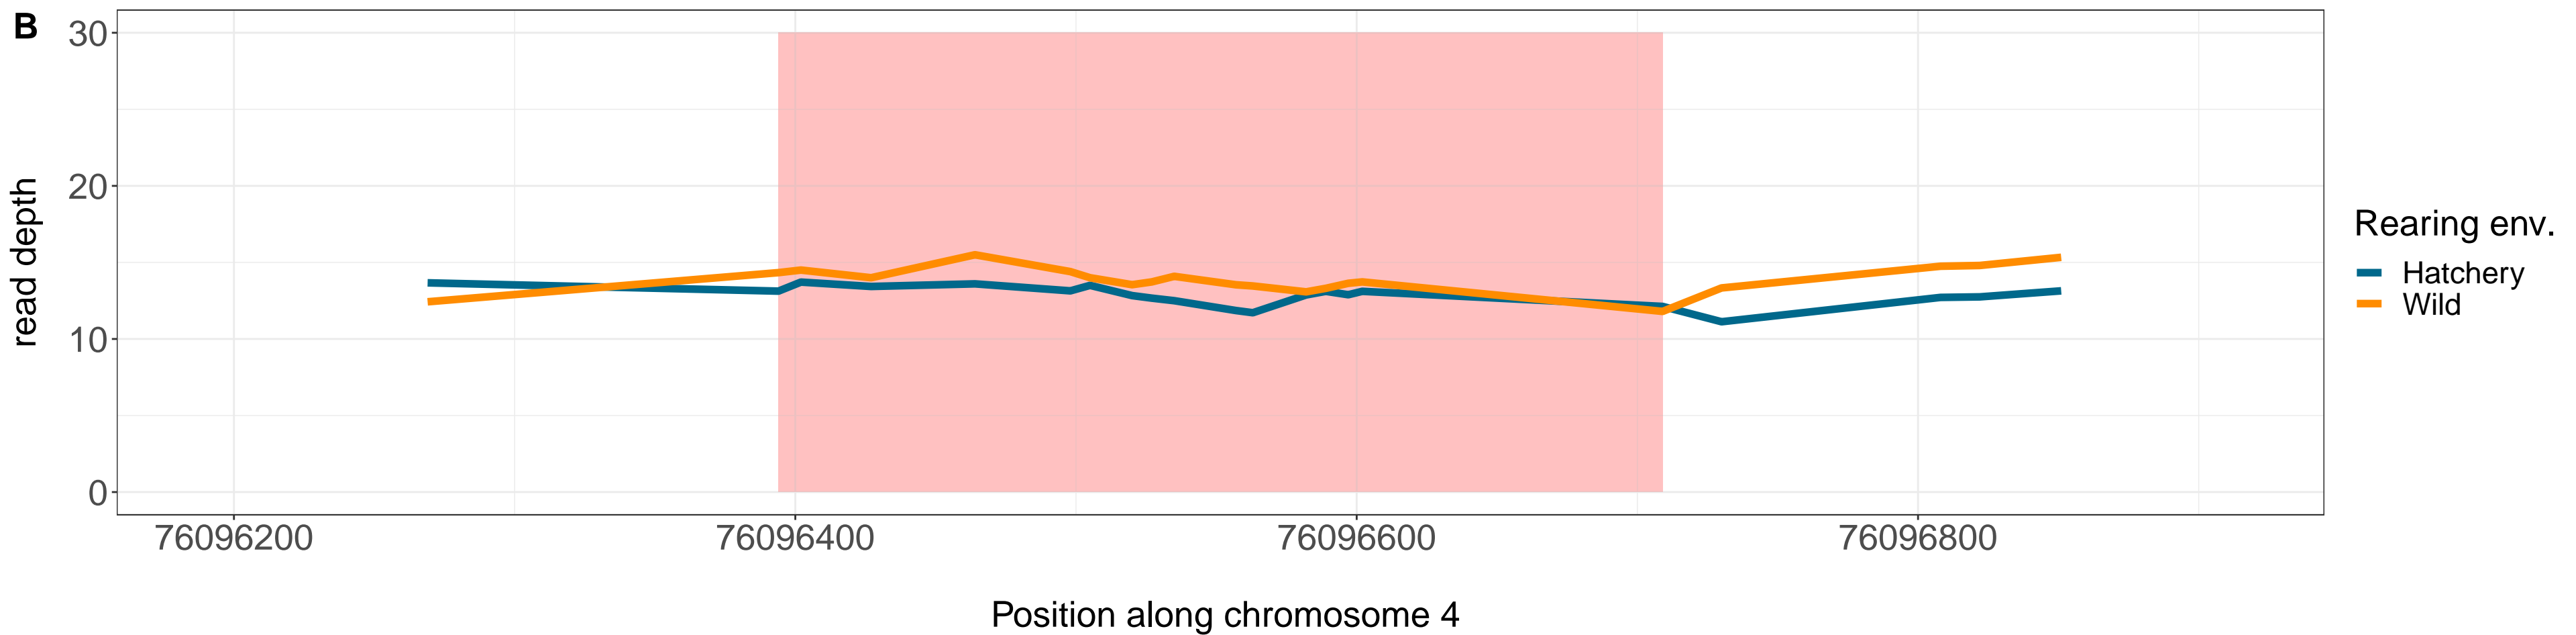

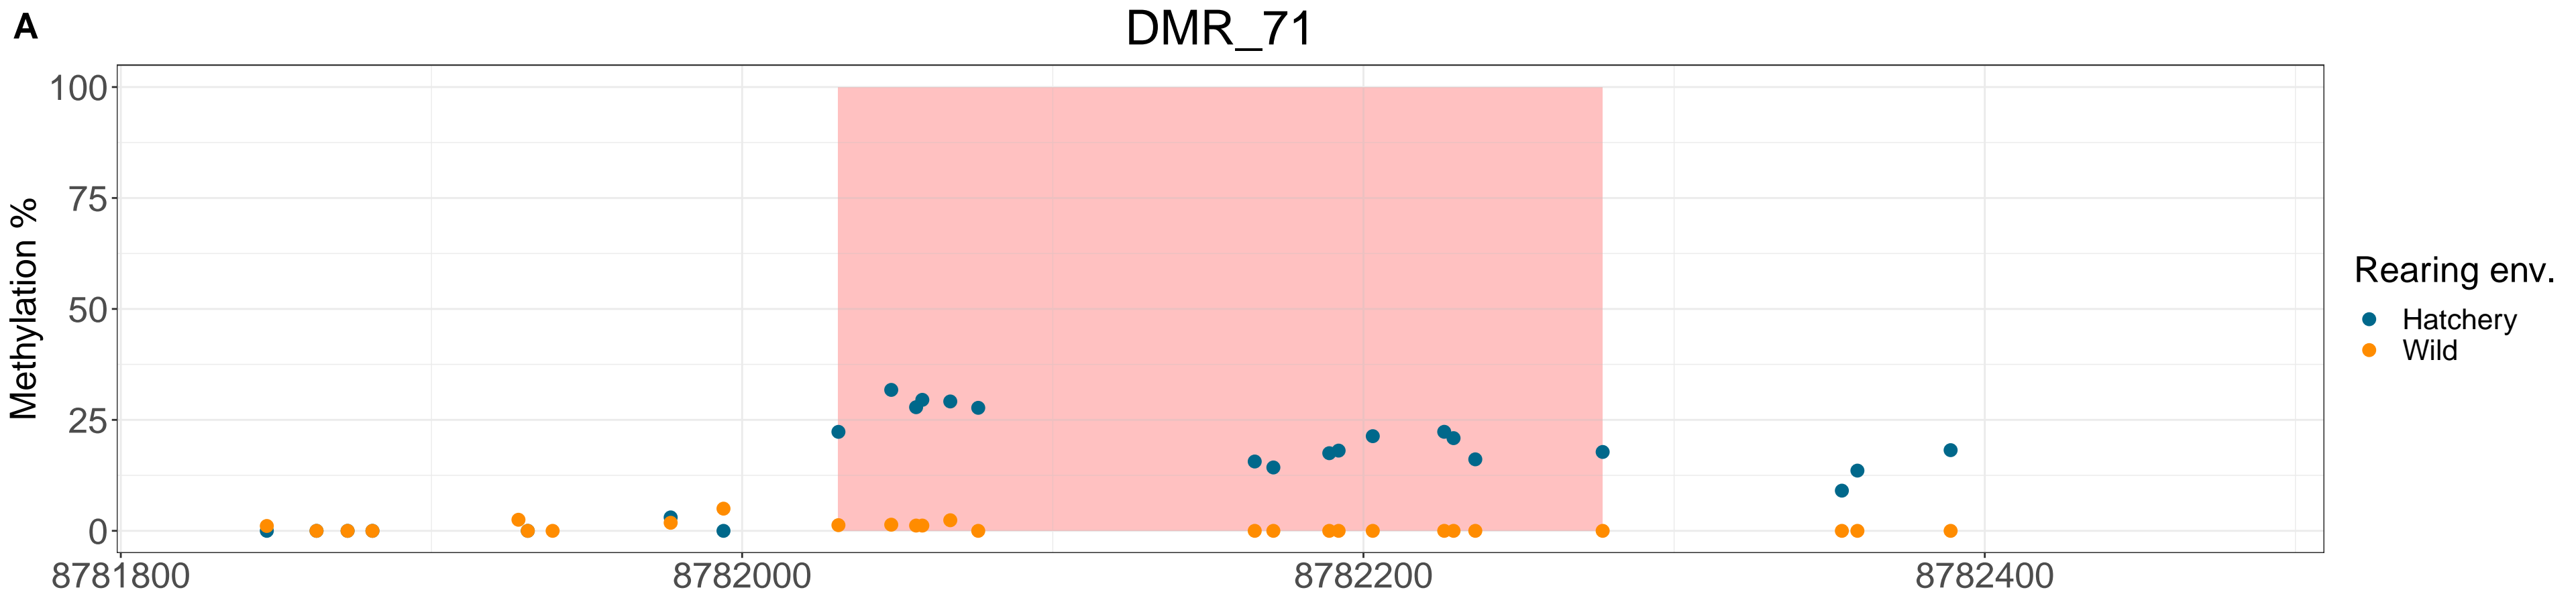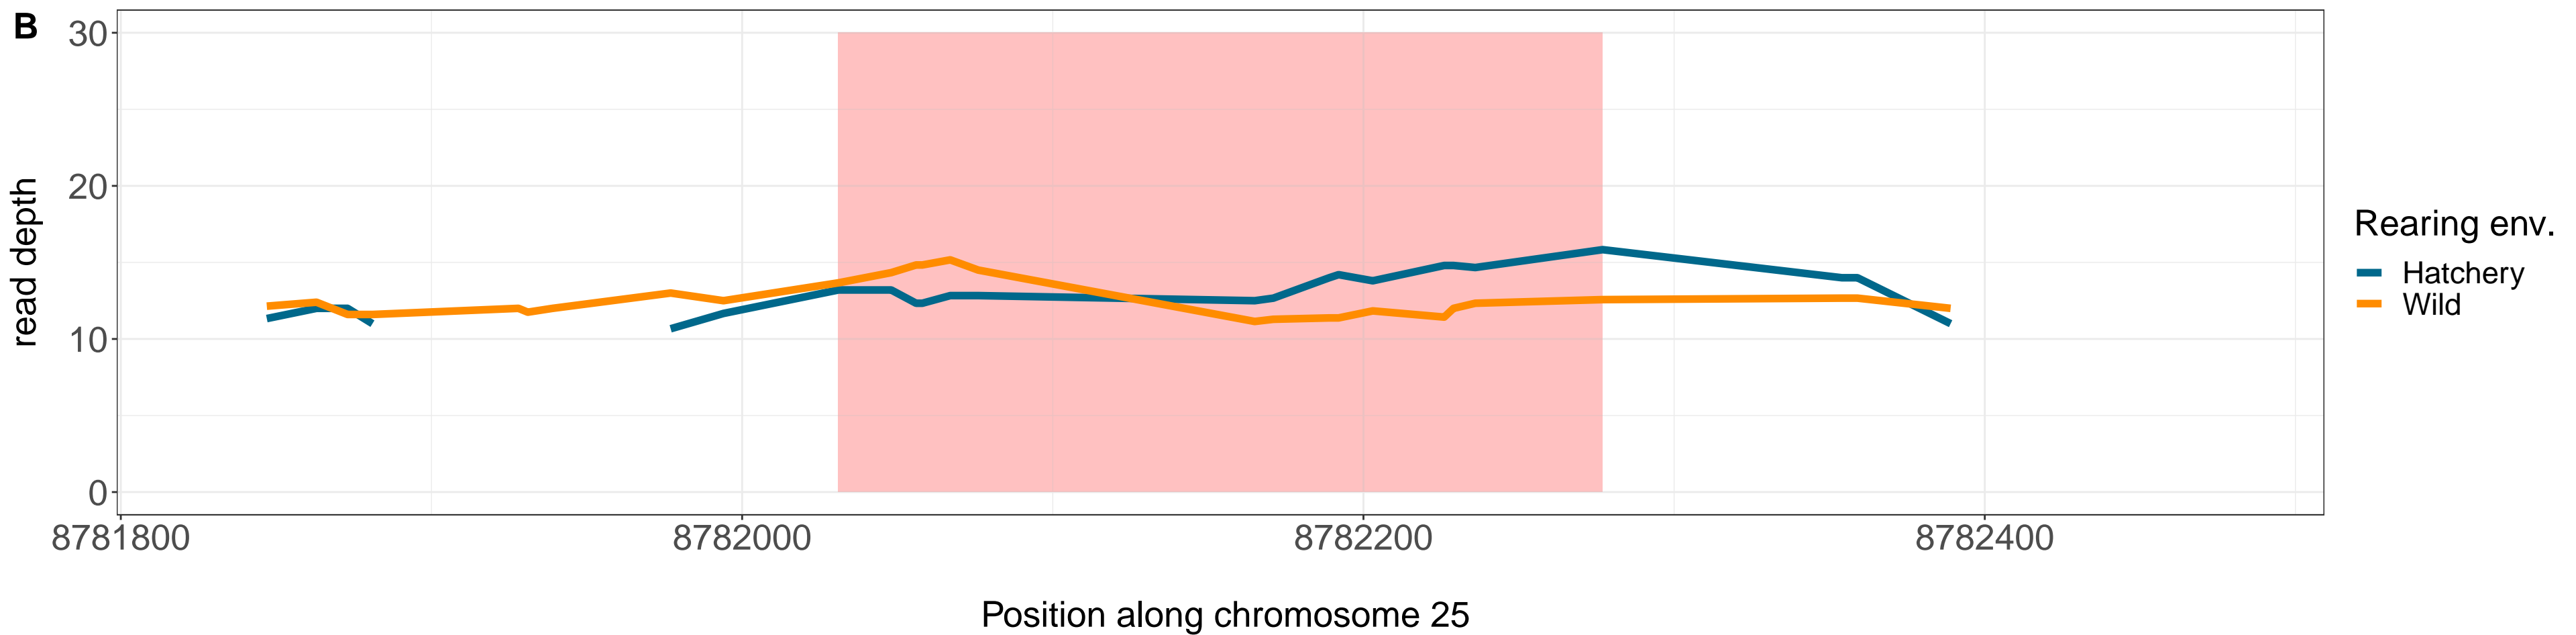

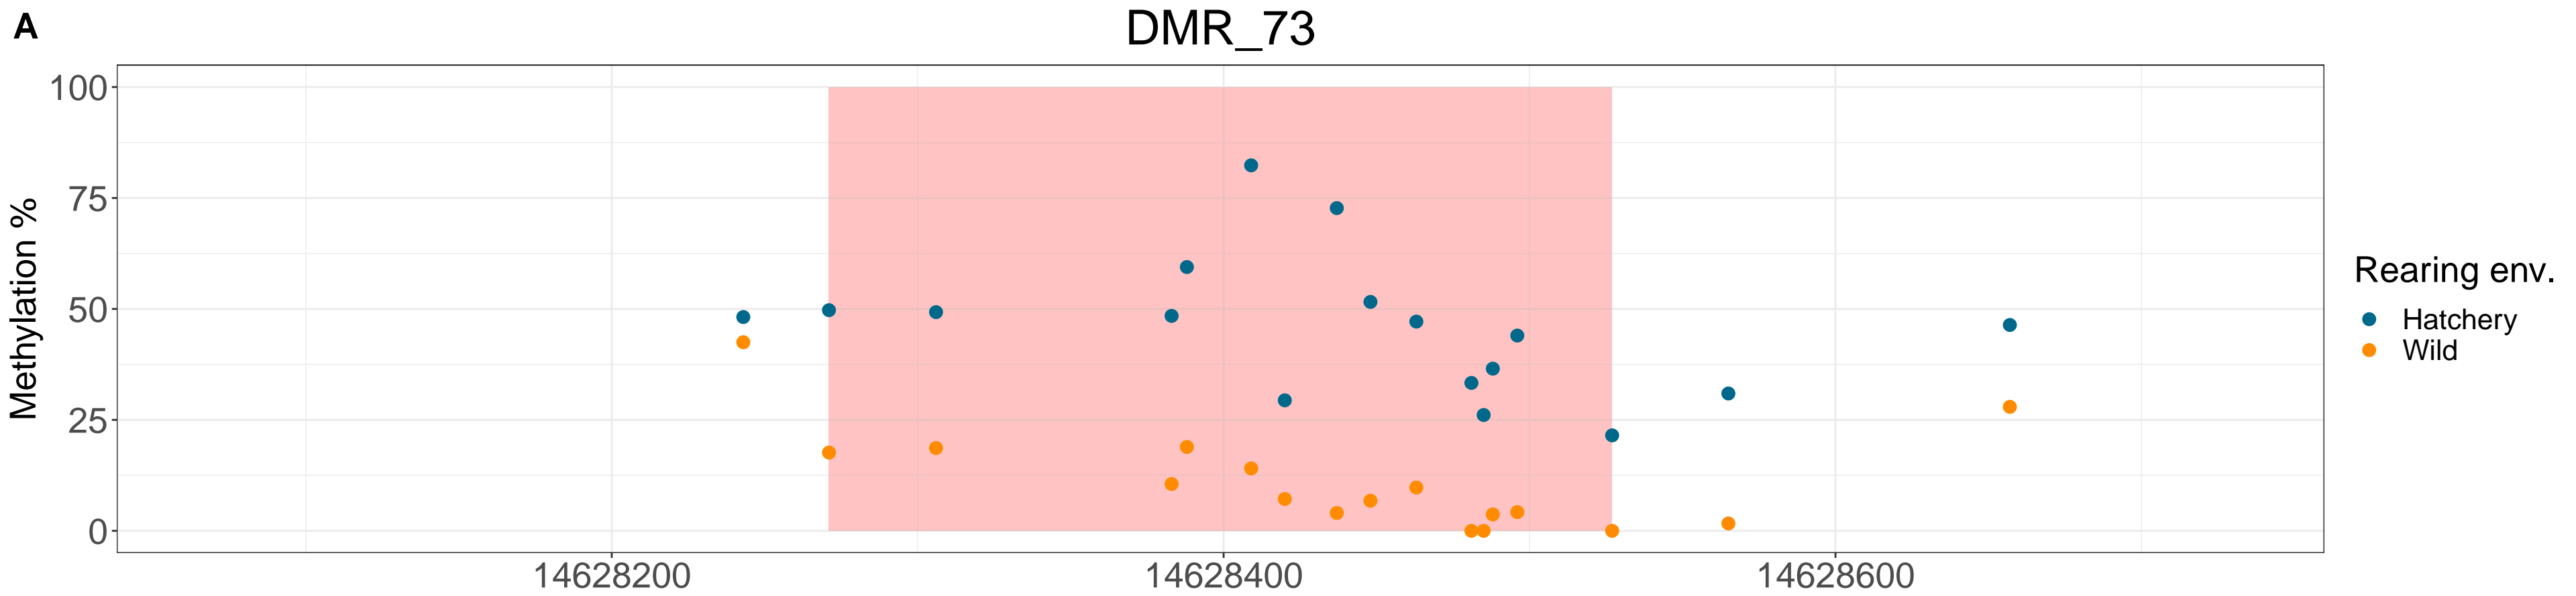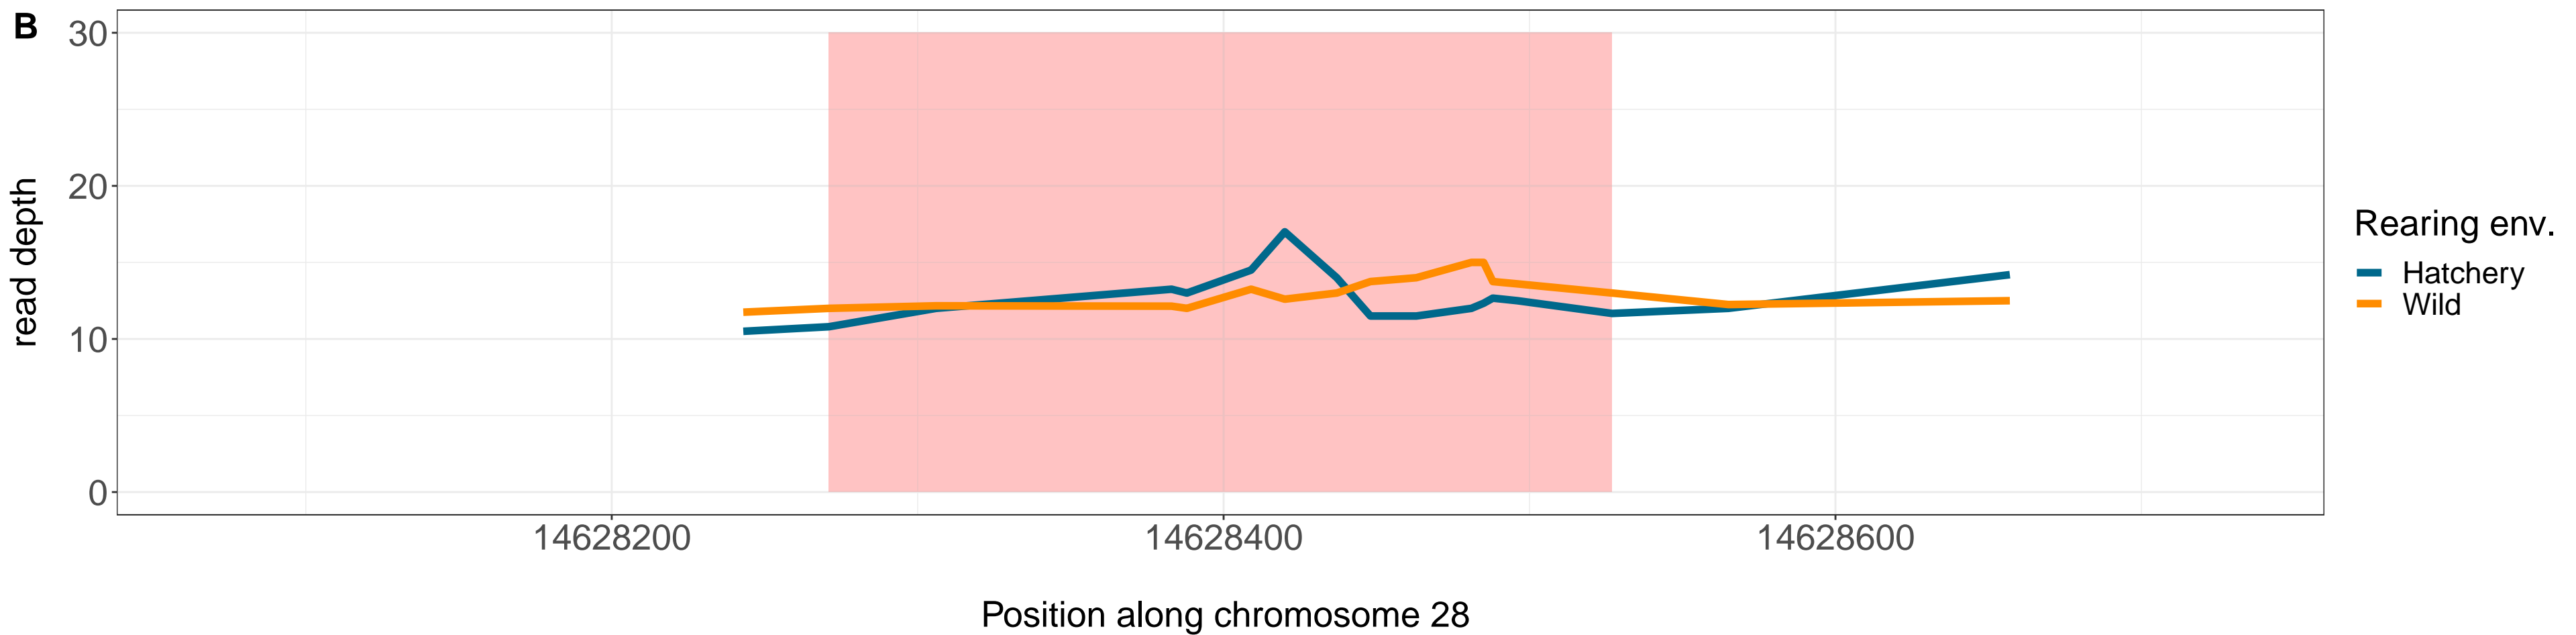

**A**

DMR\_74

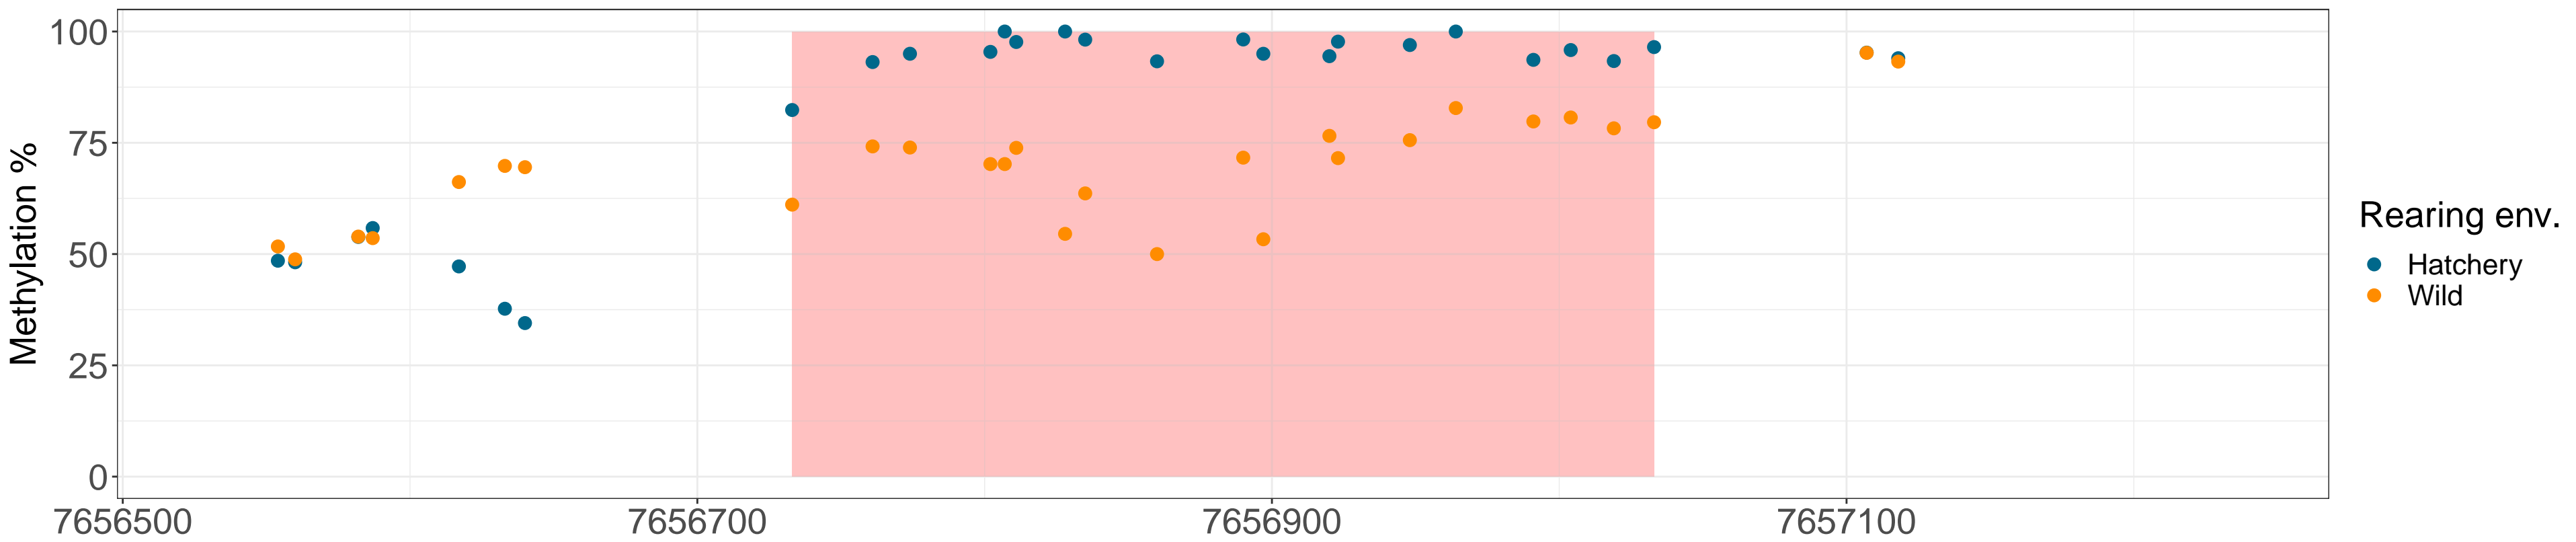**B**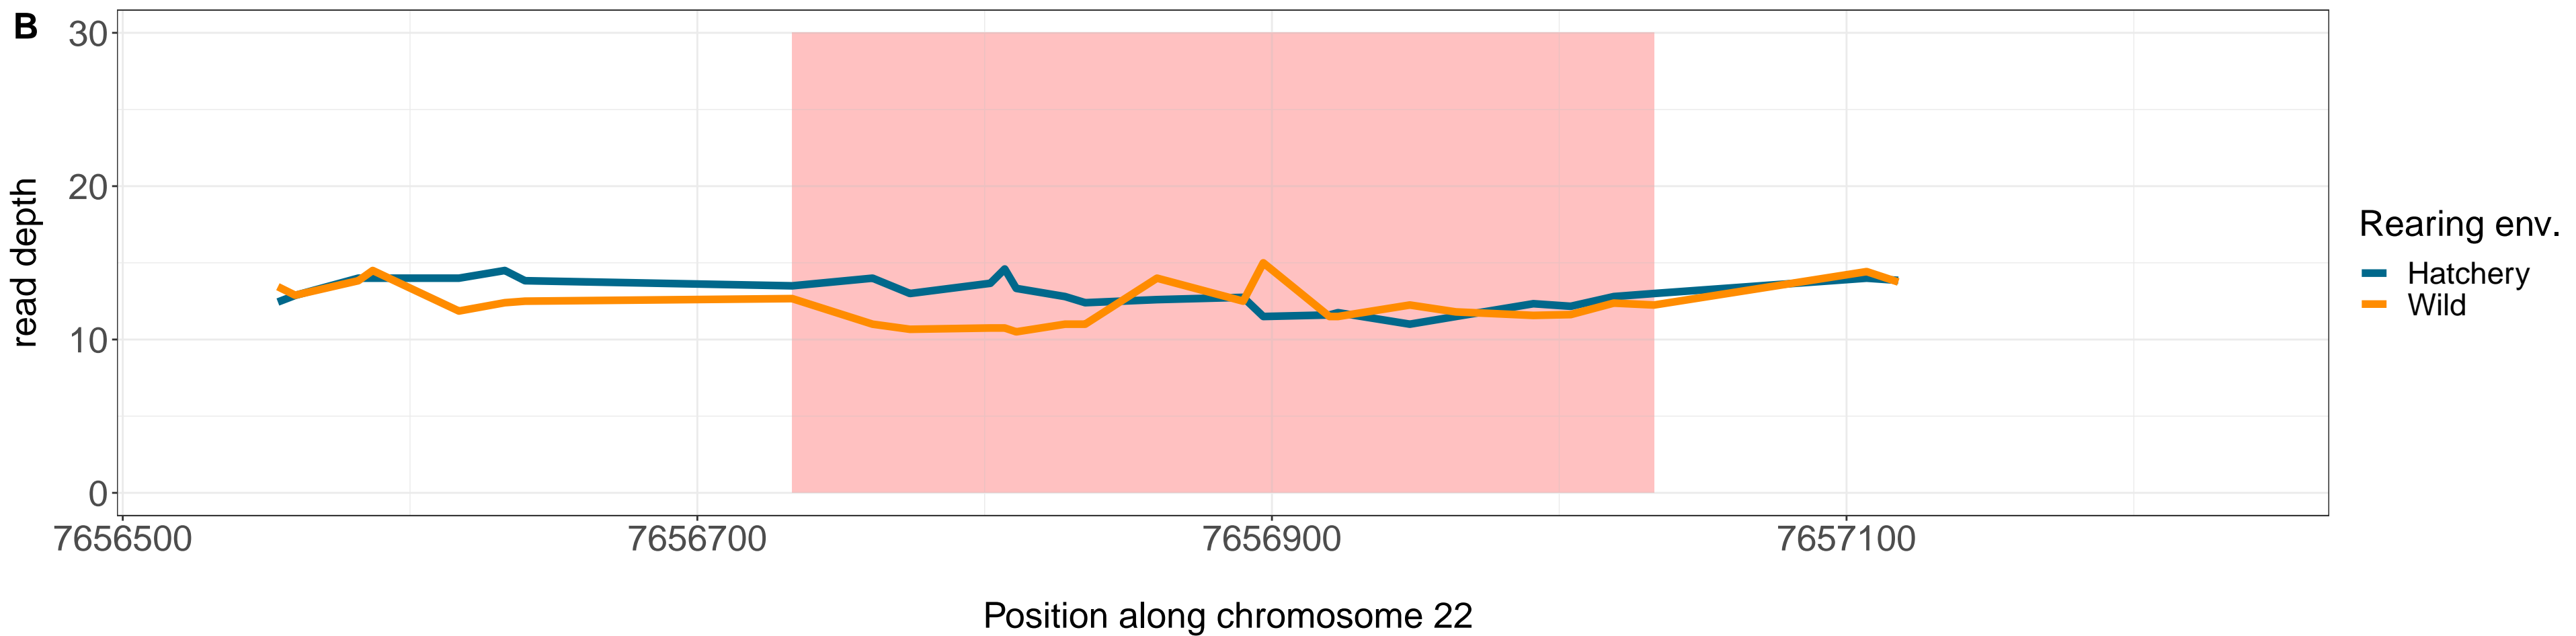



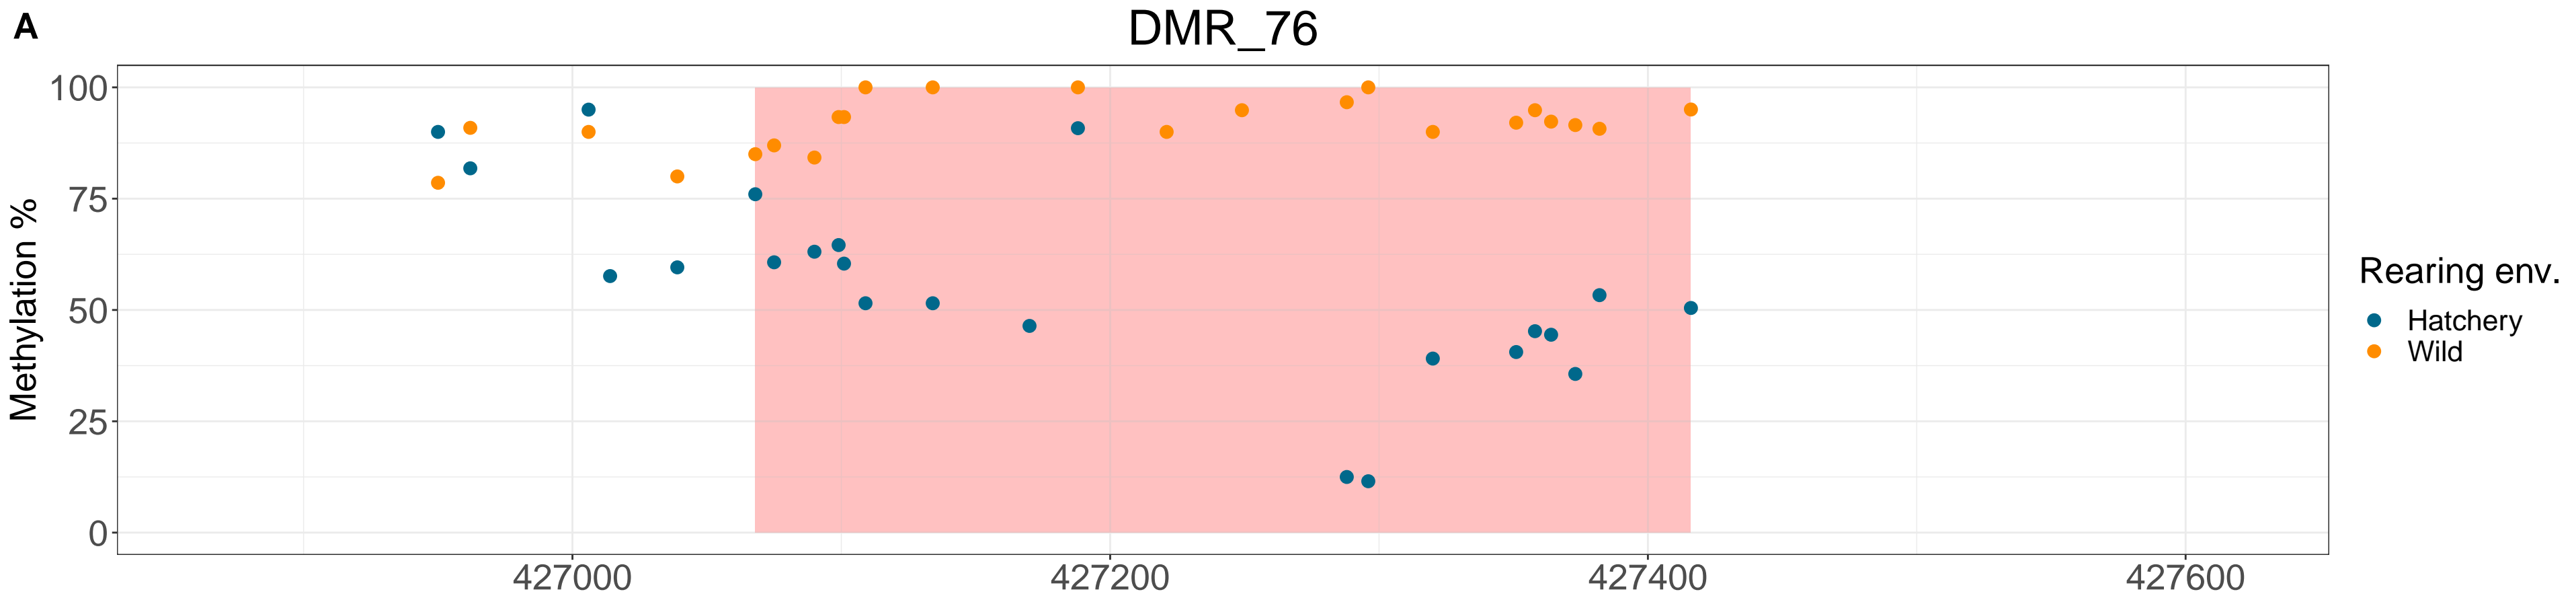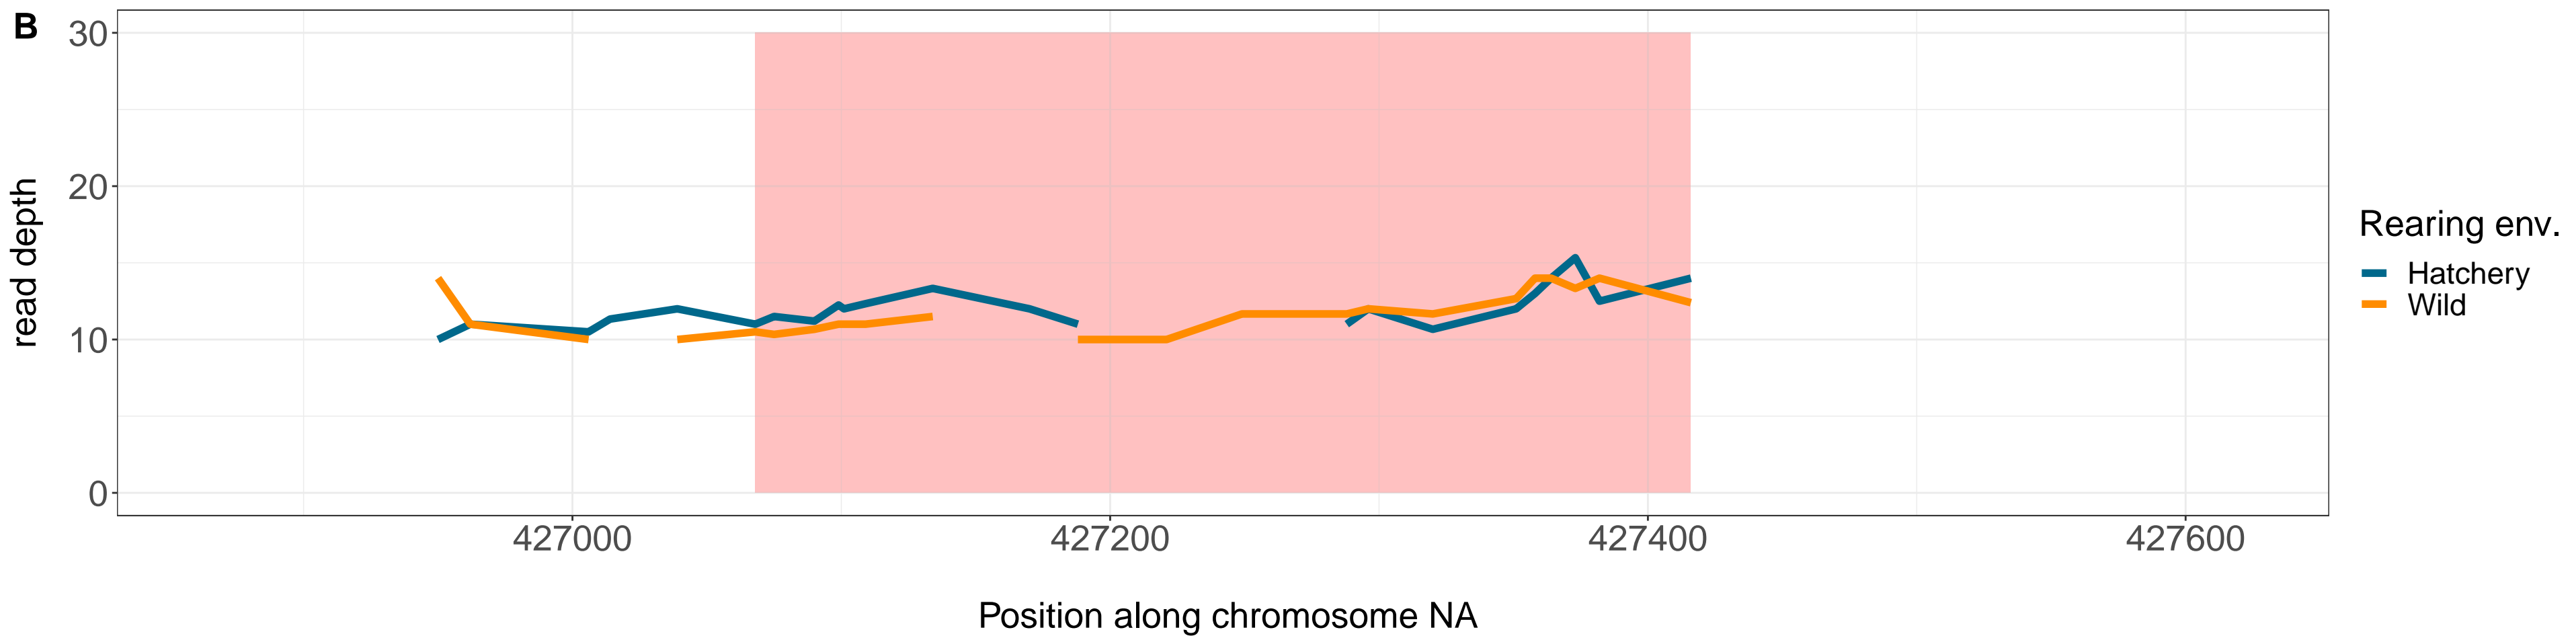

# DMR\_77

XM\_020461631.1

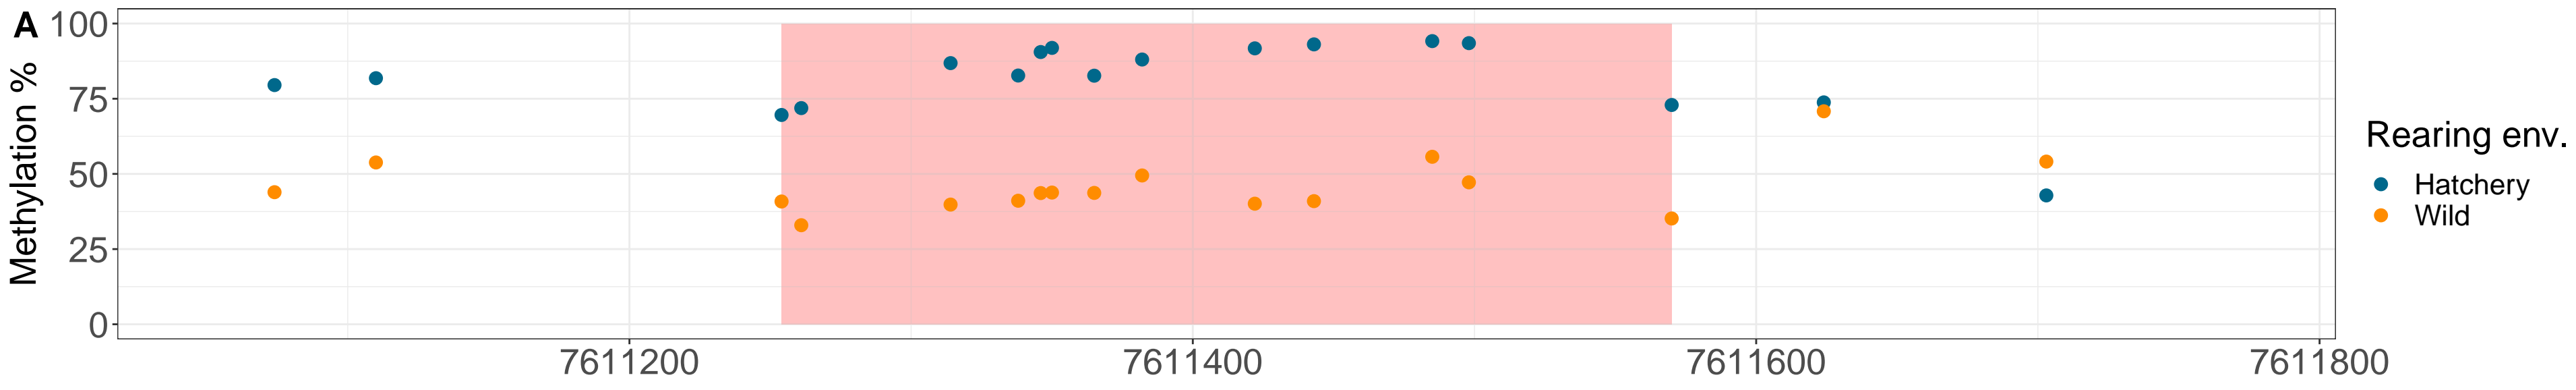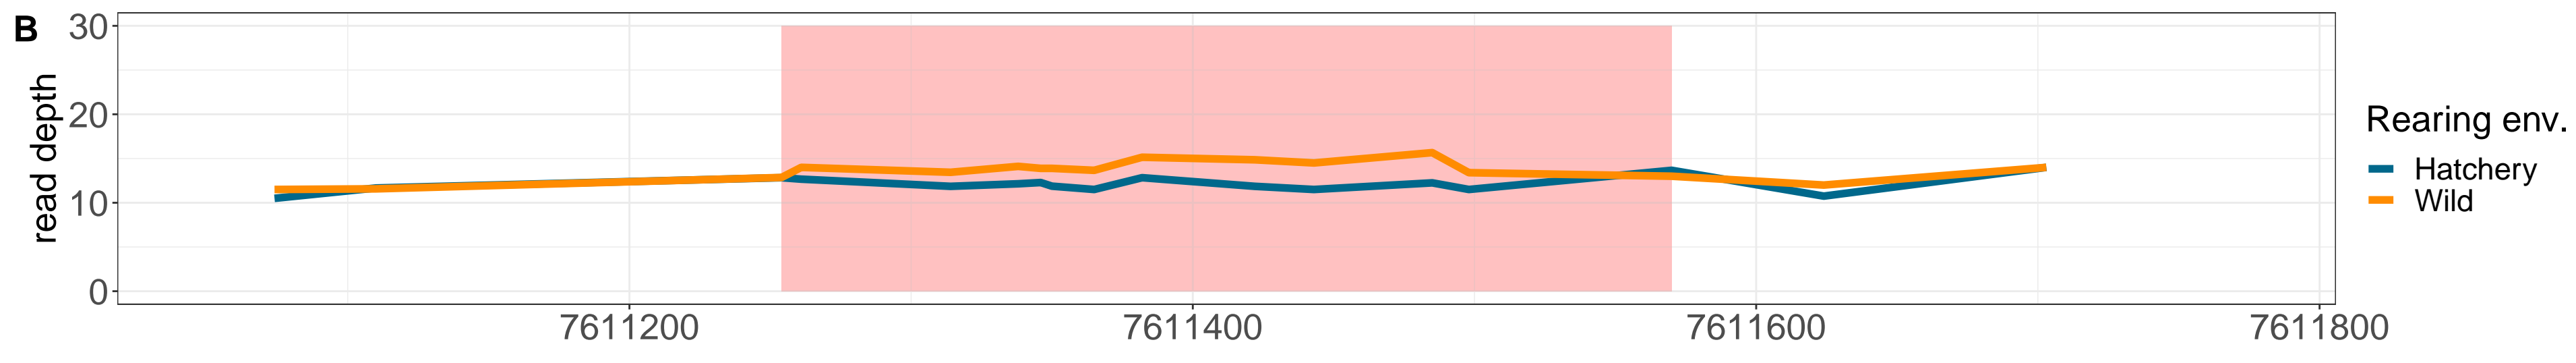

Position along chromosome 26

**A**

## DMR\_78

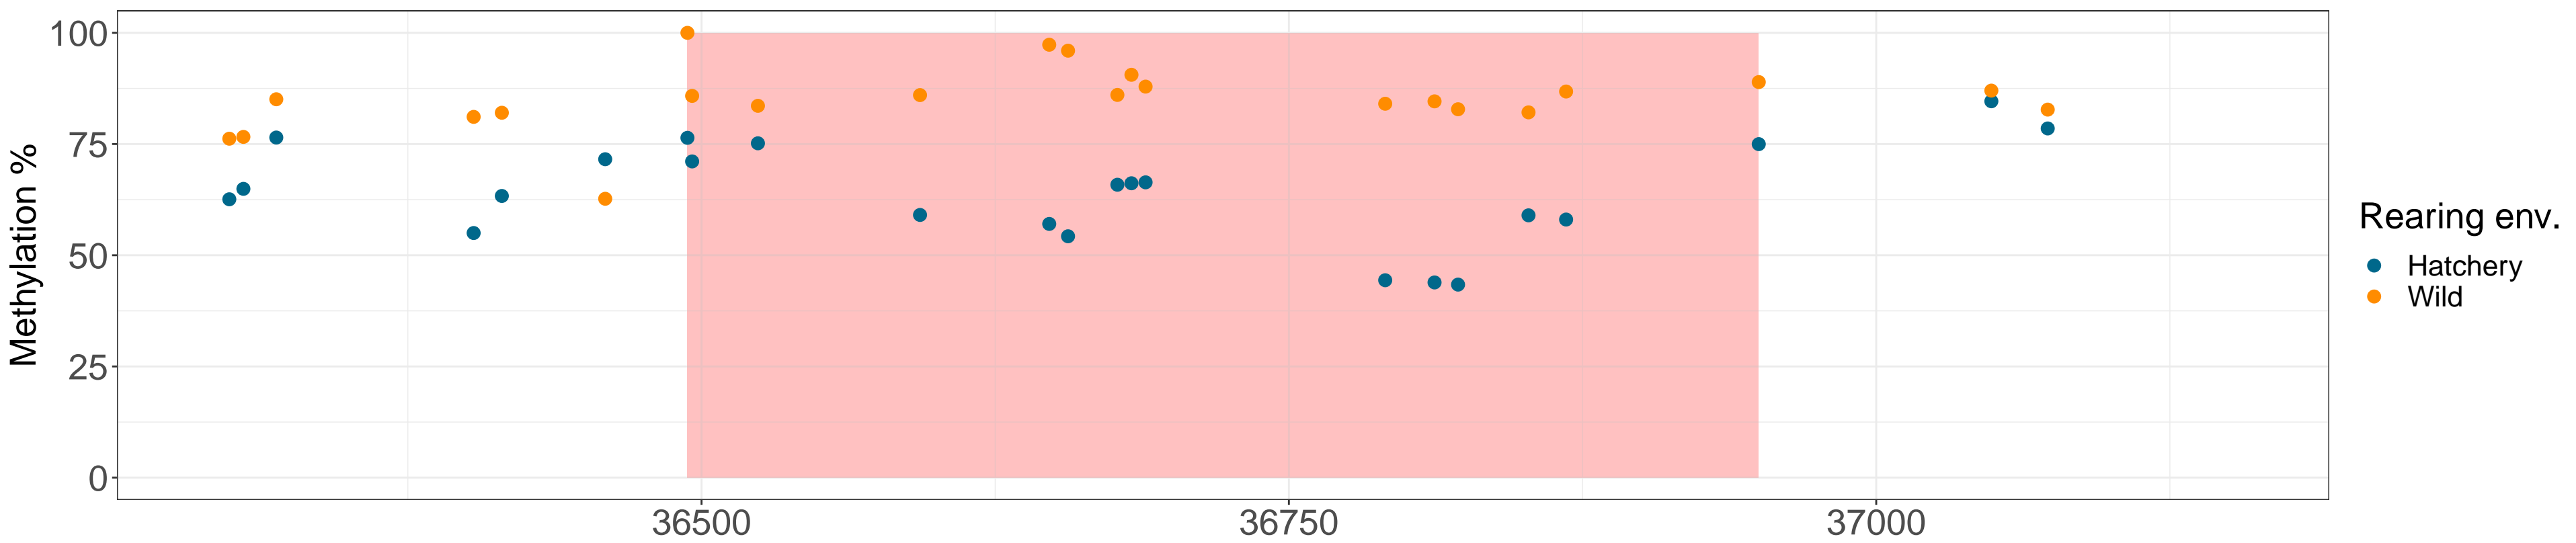**B**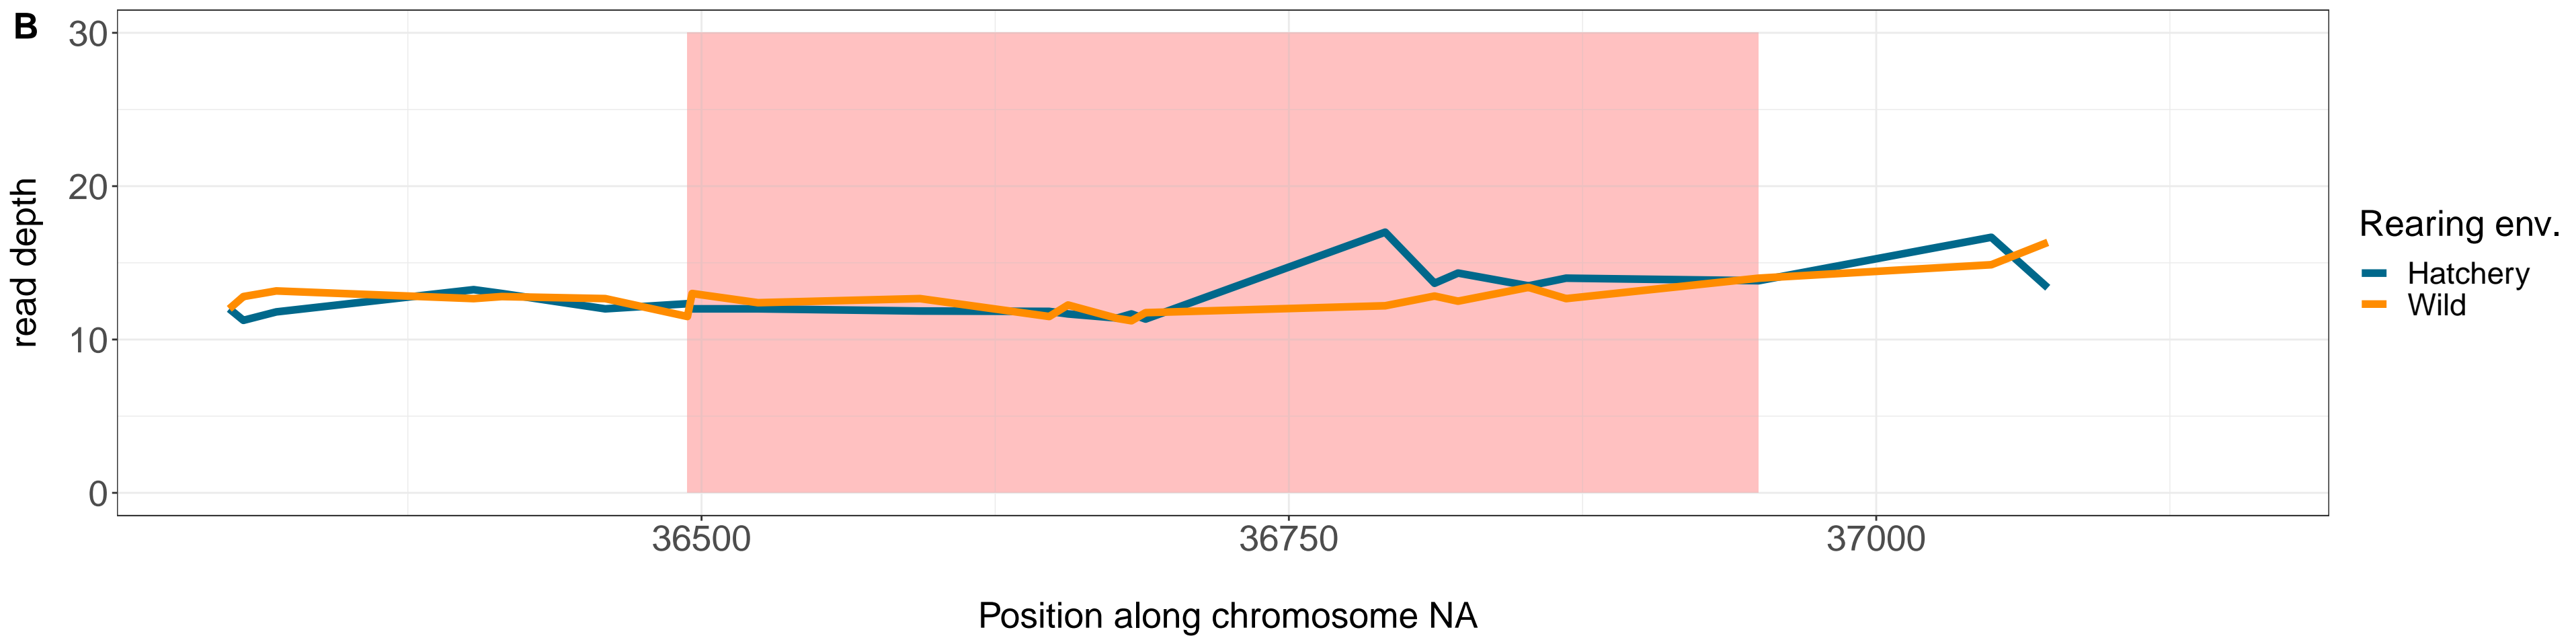

# DMR\_79

XM\_020457260.1

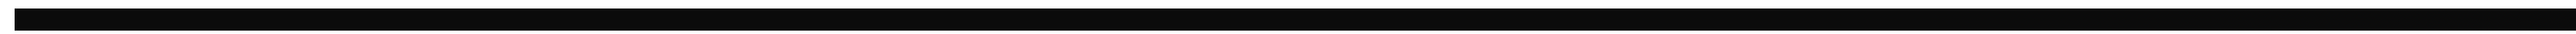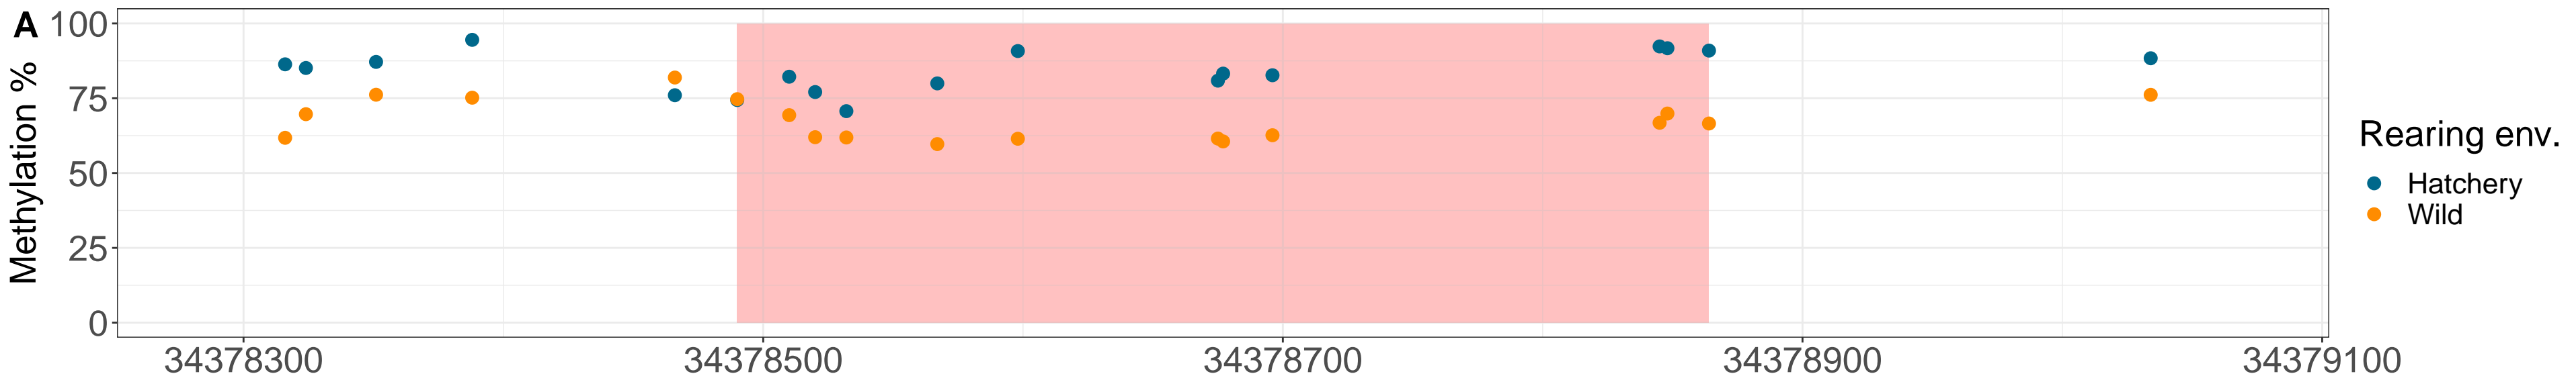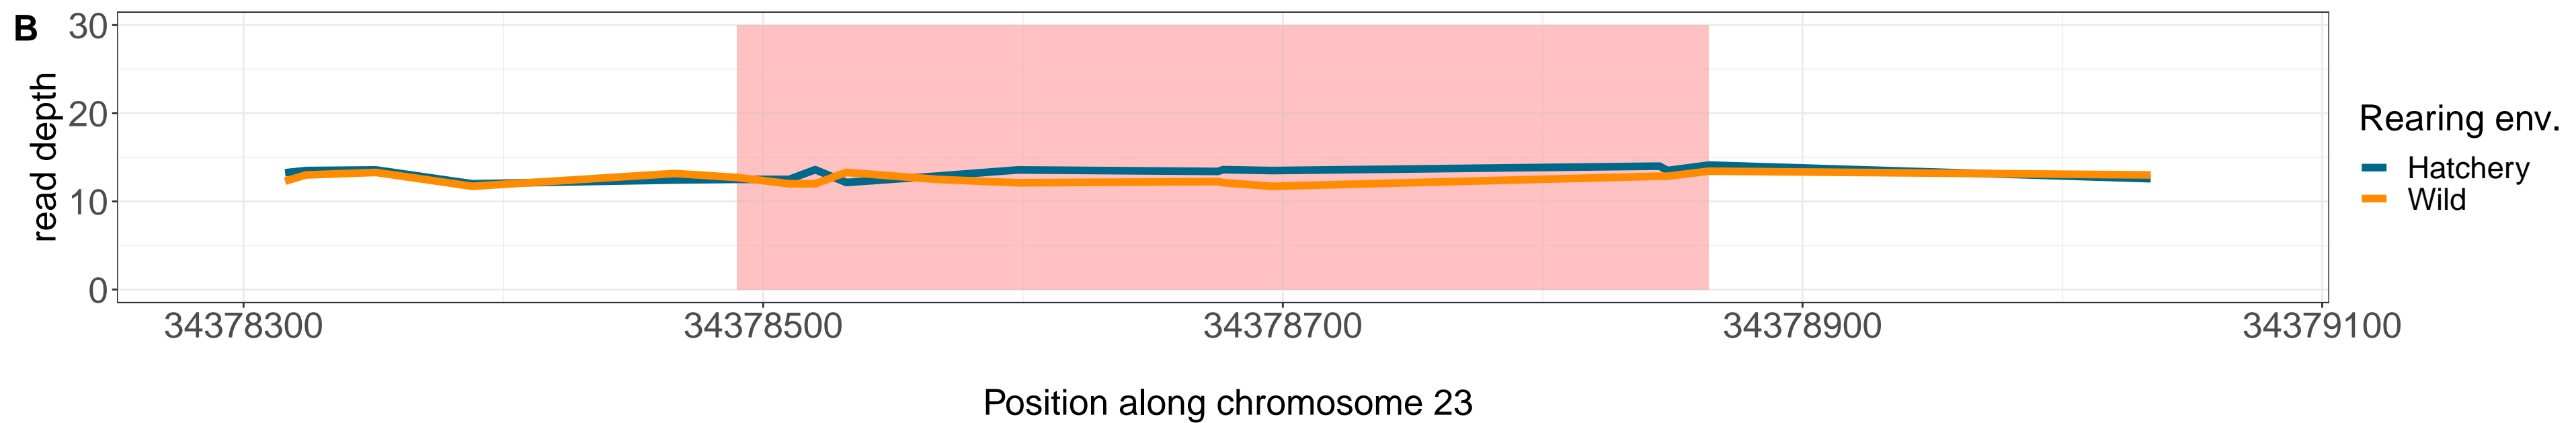

Position along chromosome 23

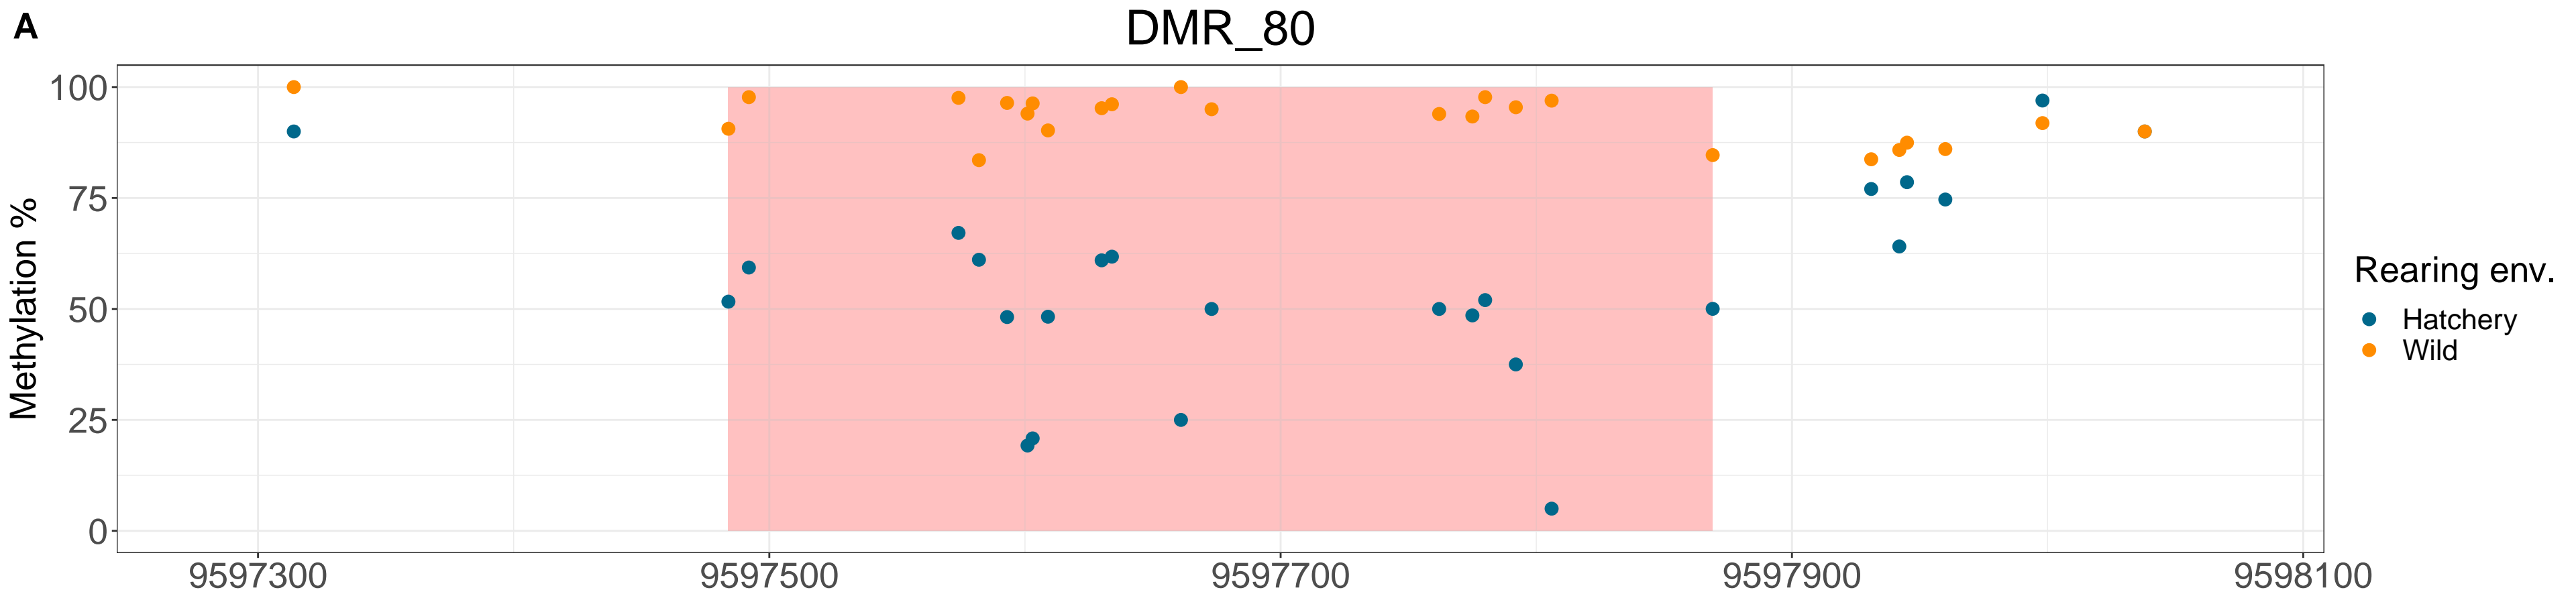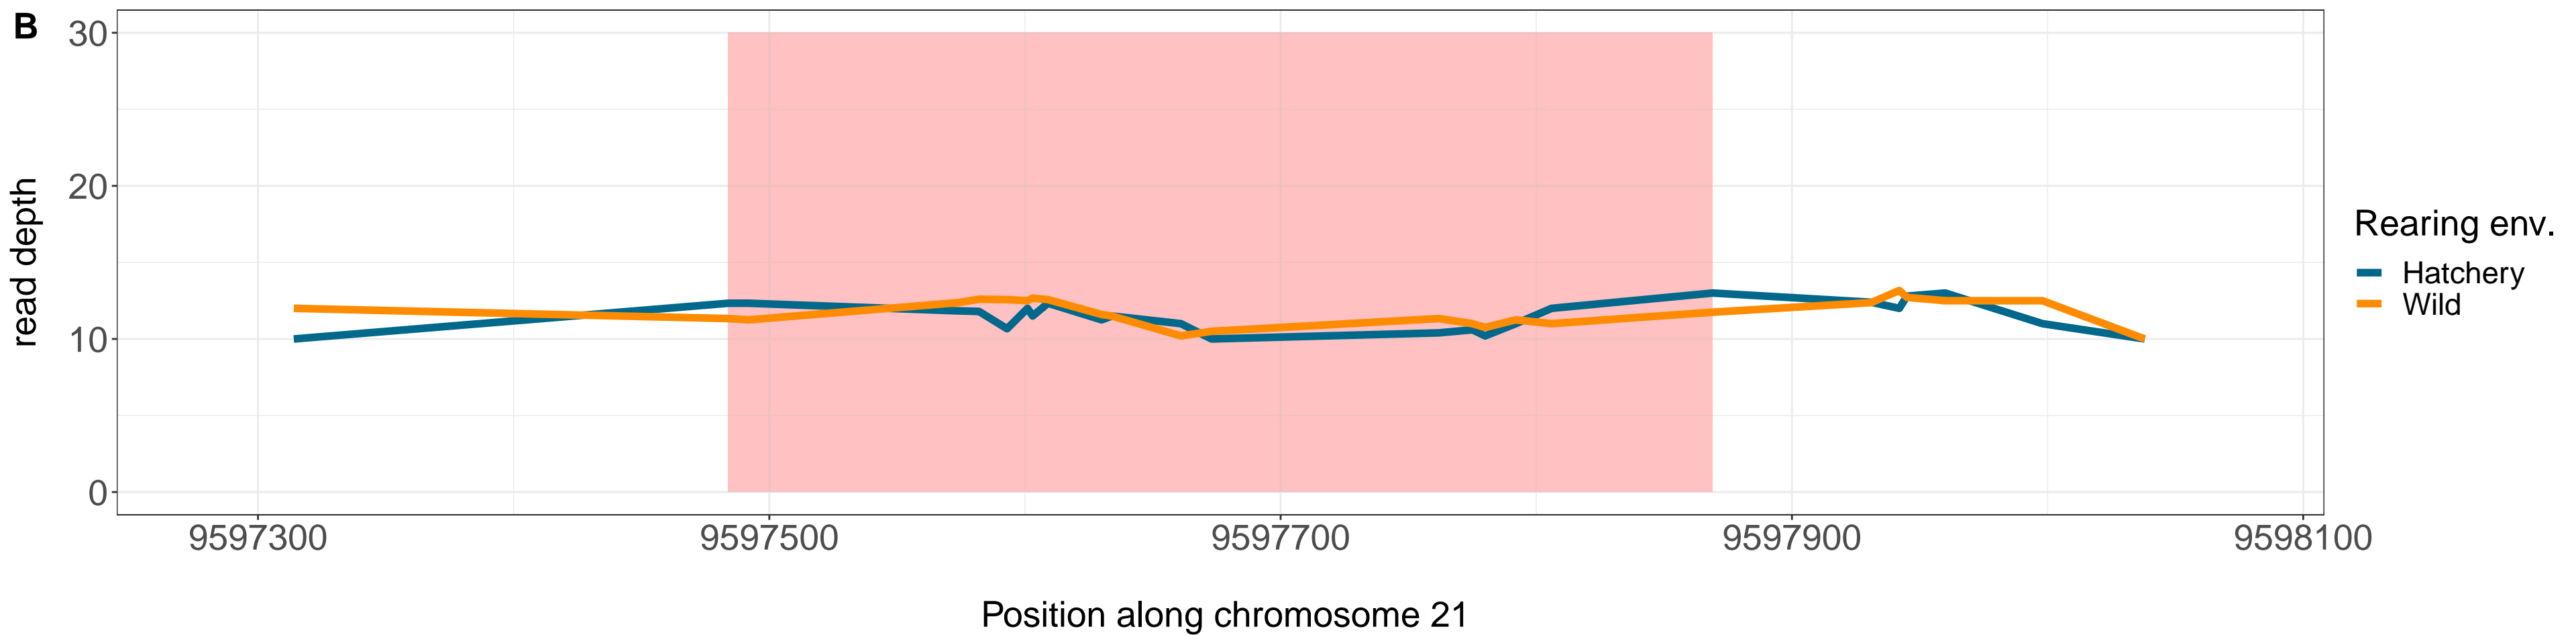

**A**

## DMR\_81

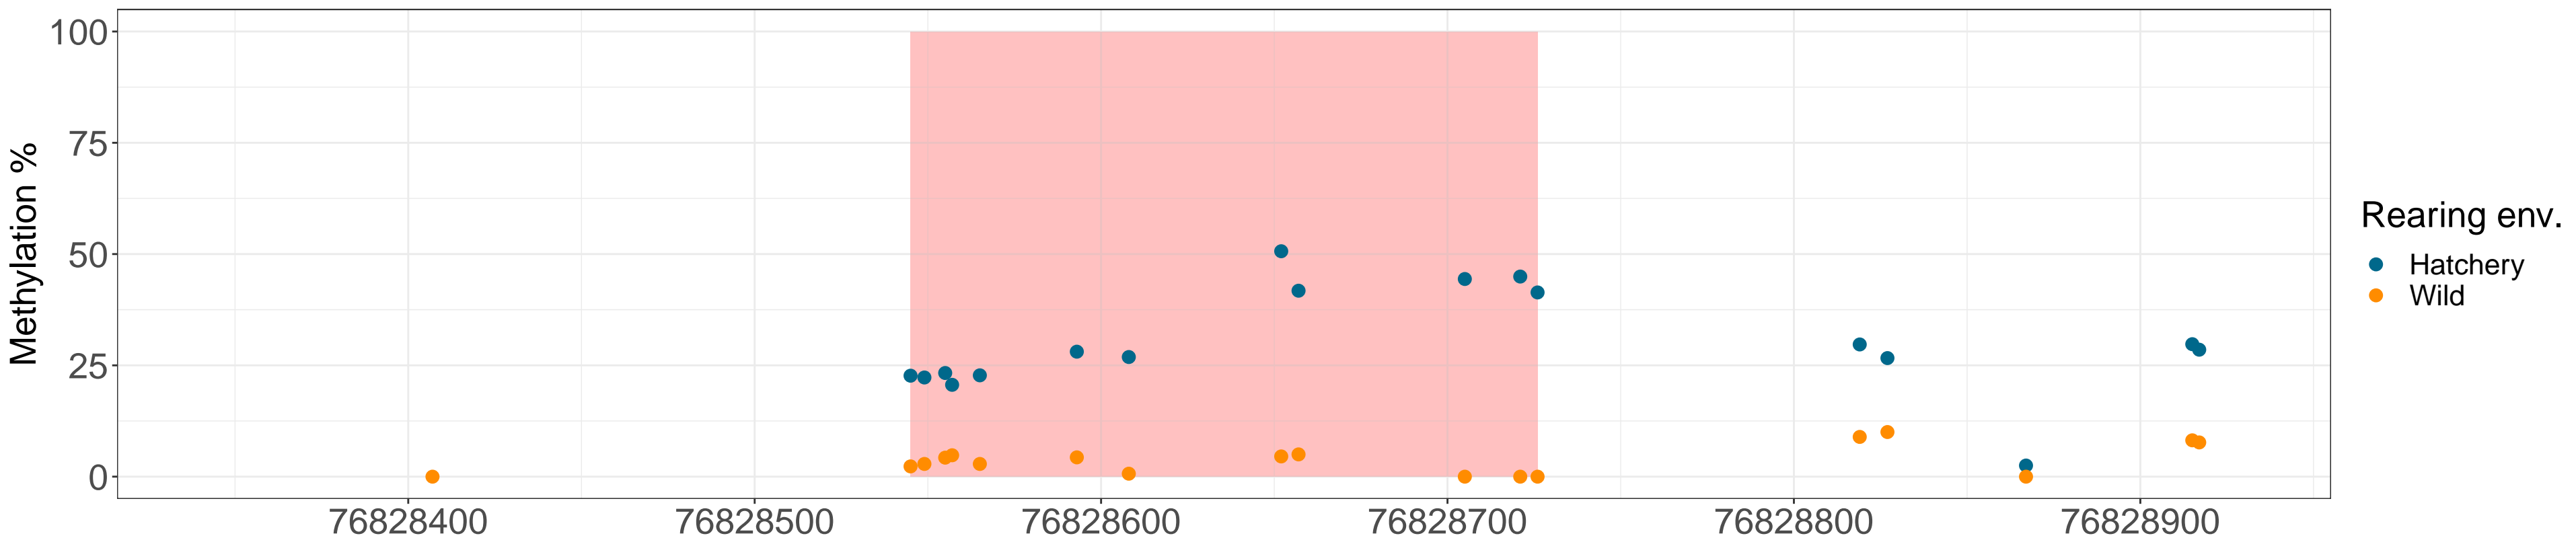**B**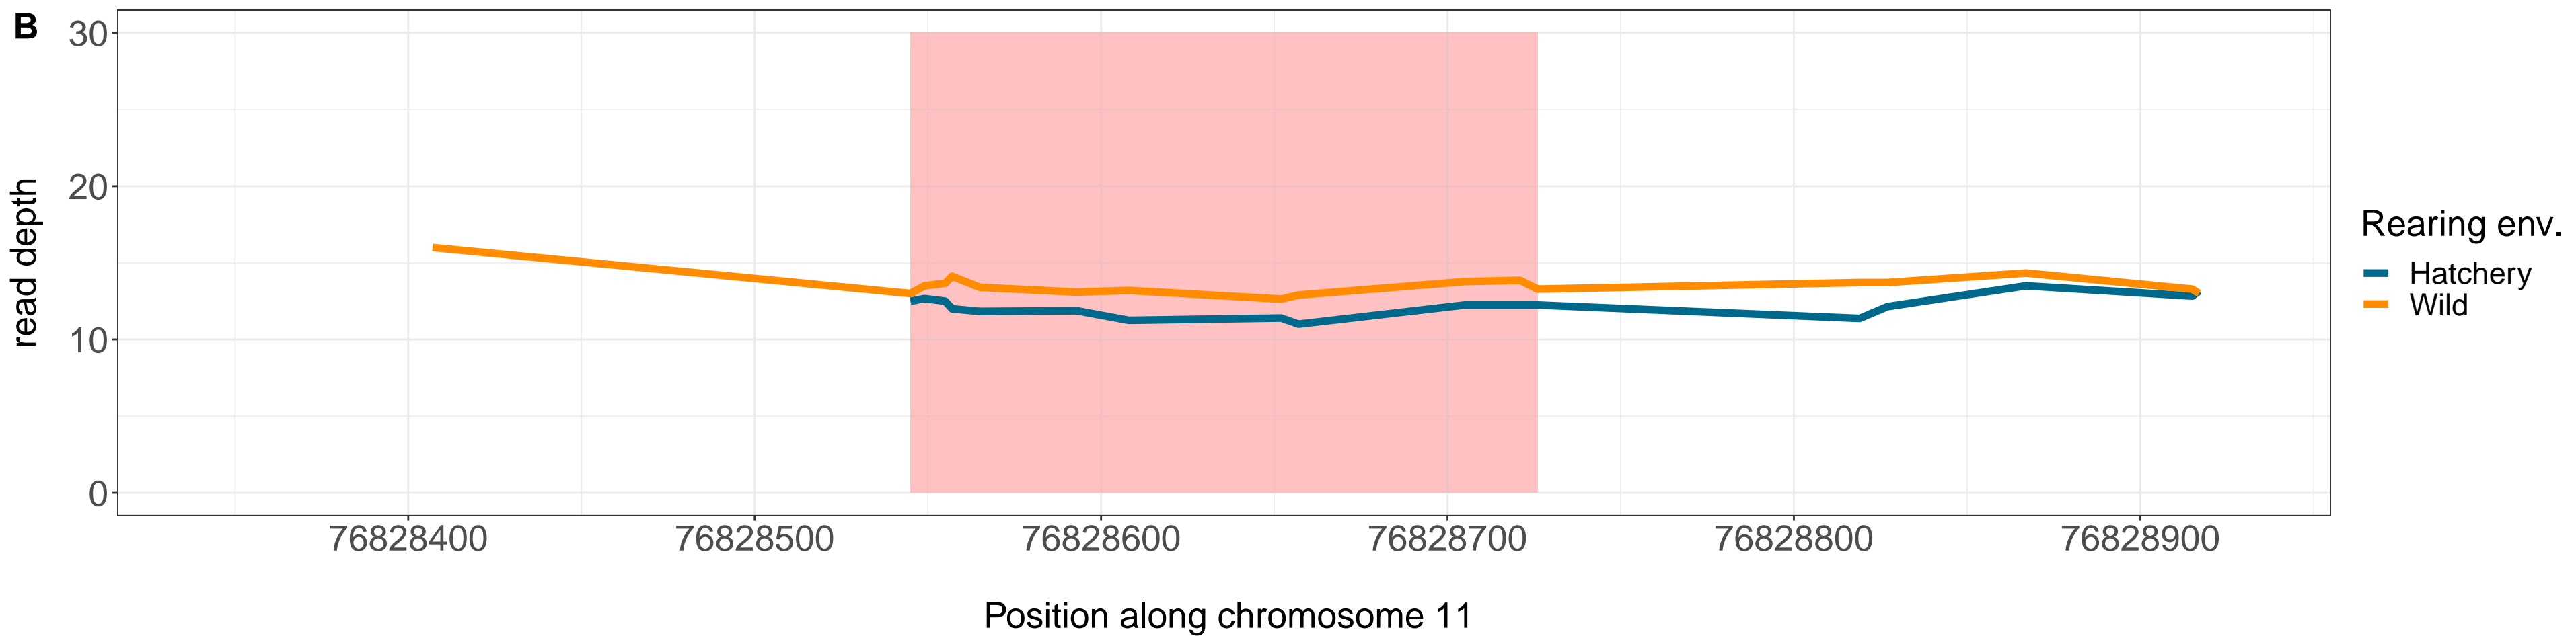

**A**

DMR\_82

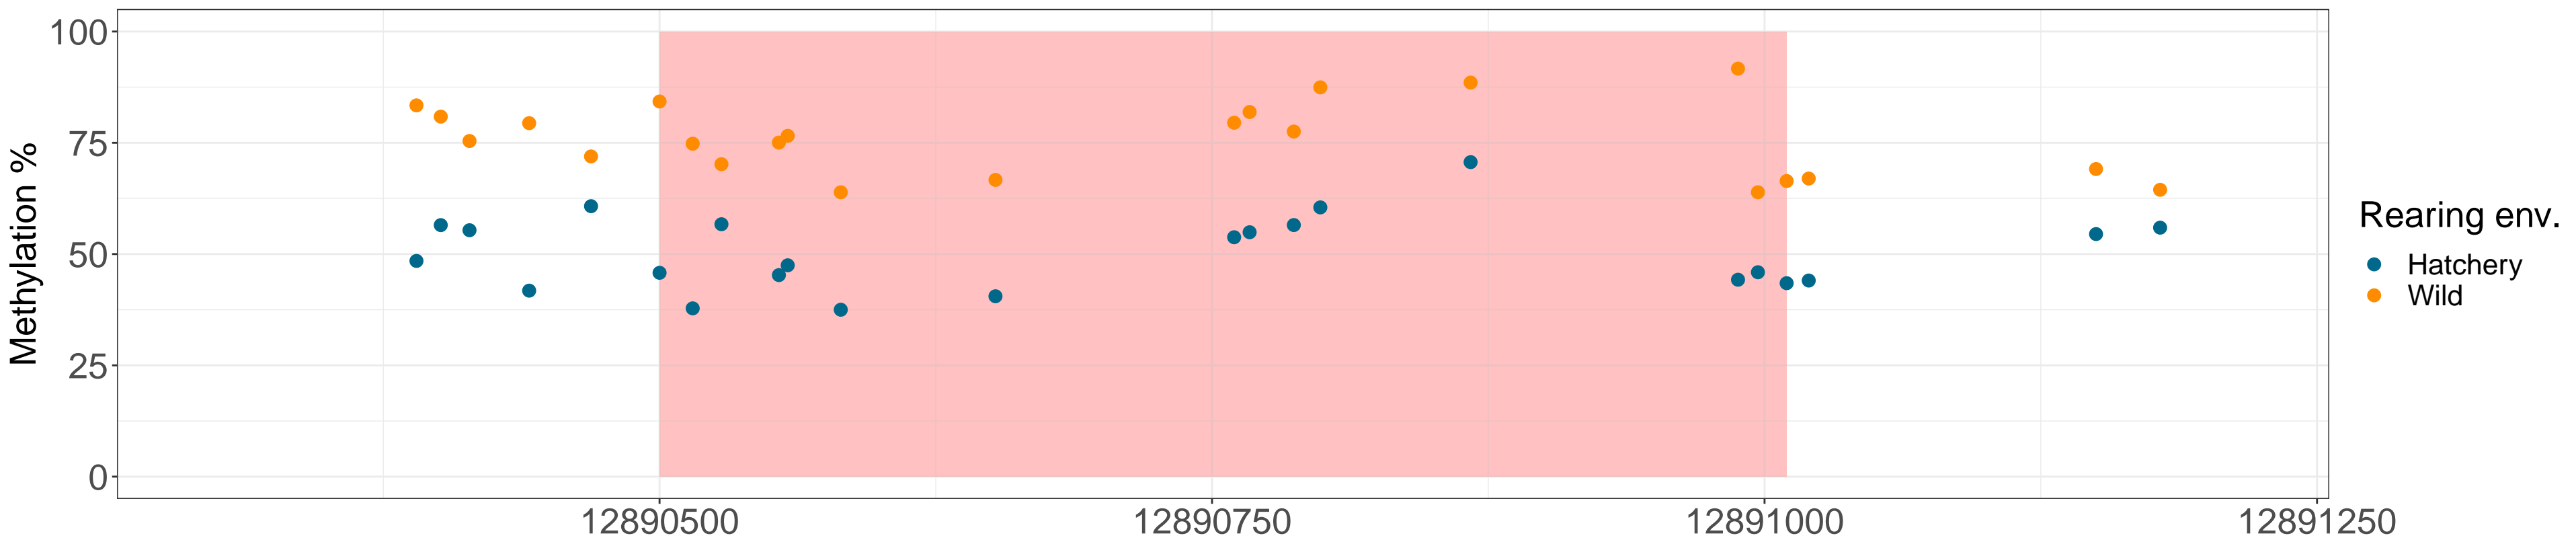**B**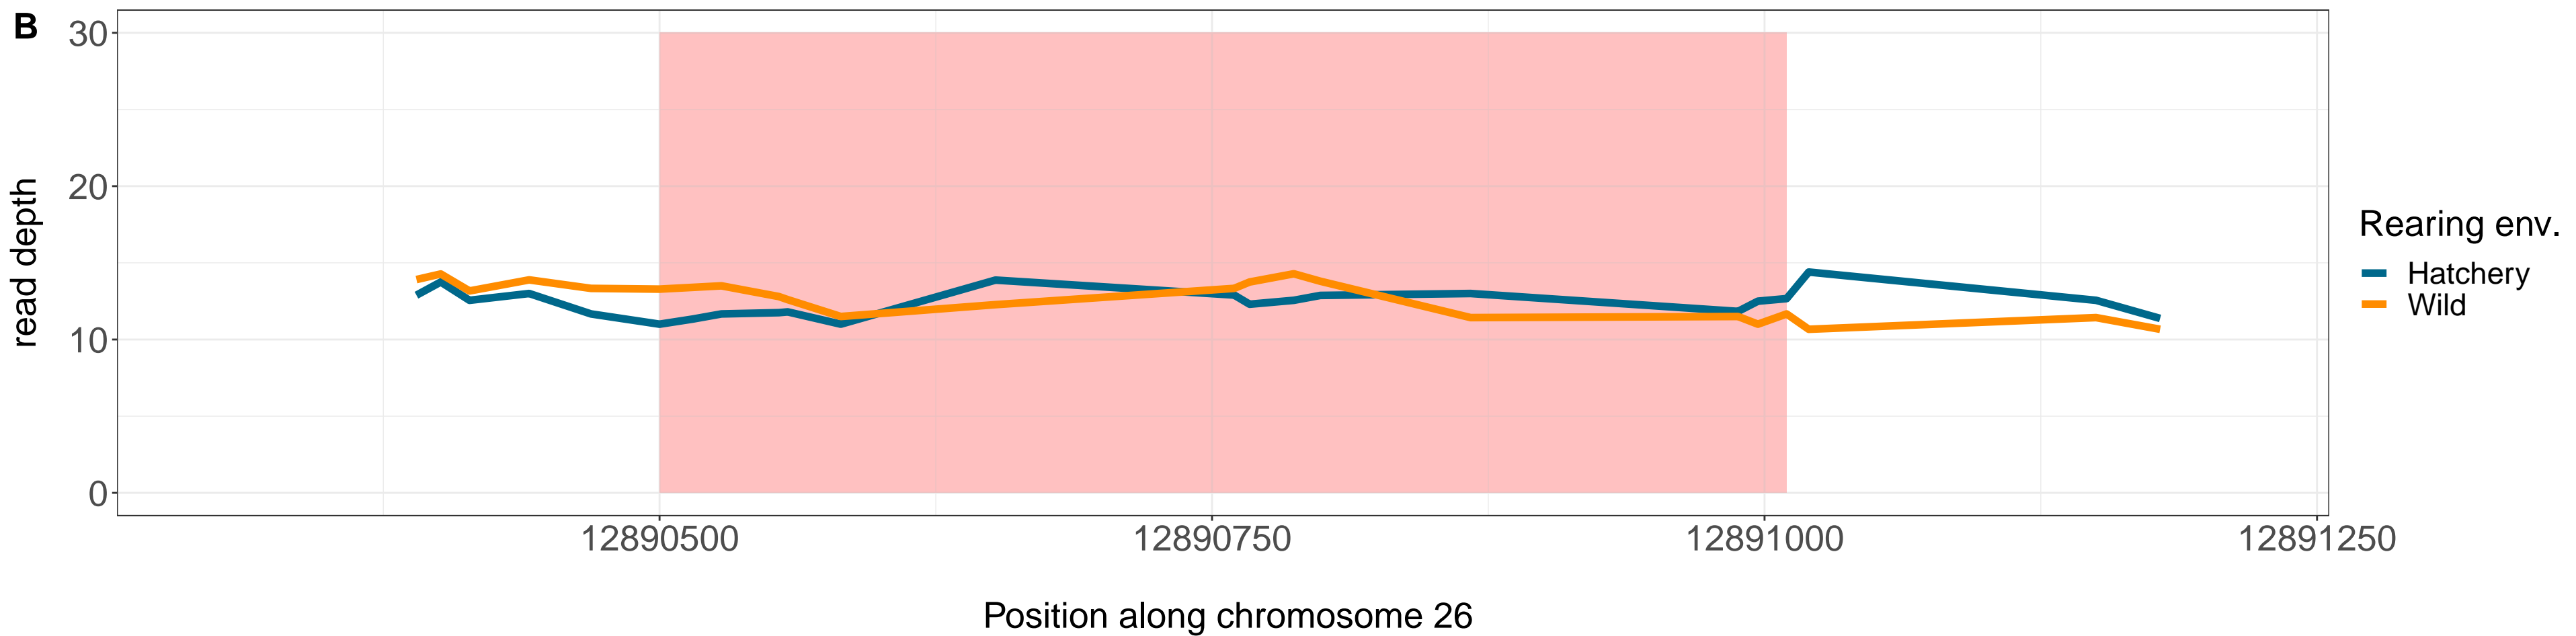

# DMR\_84

XM\_020468751.1

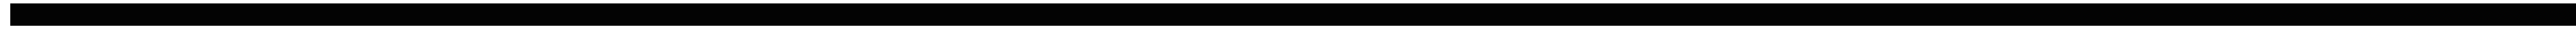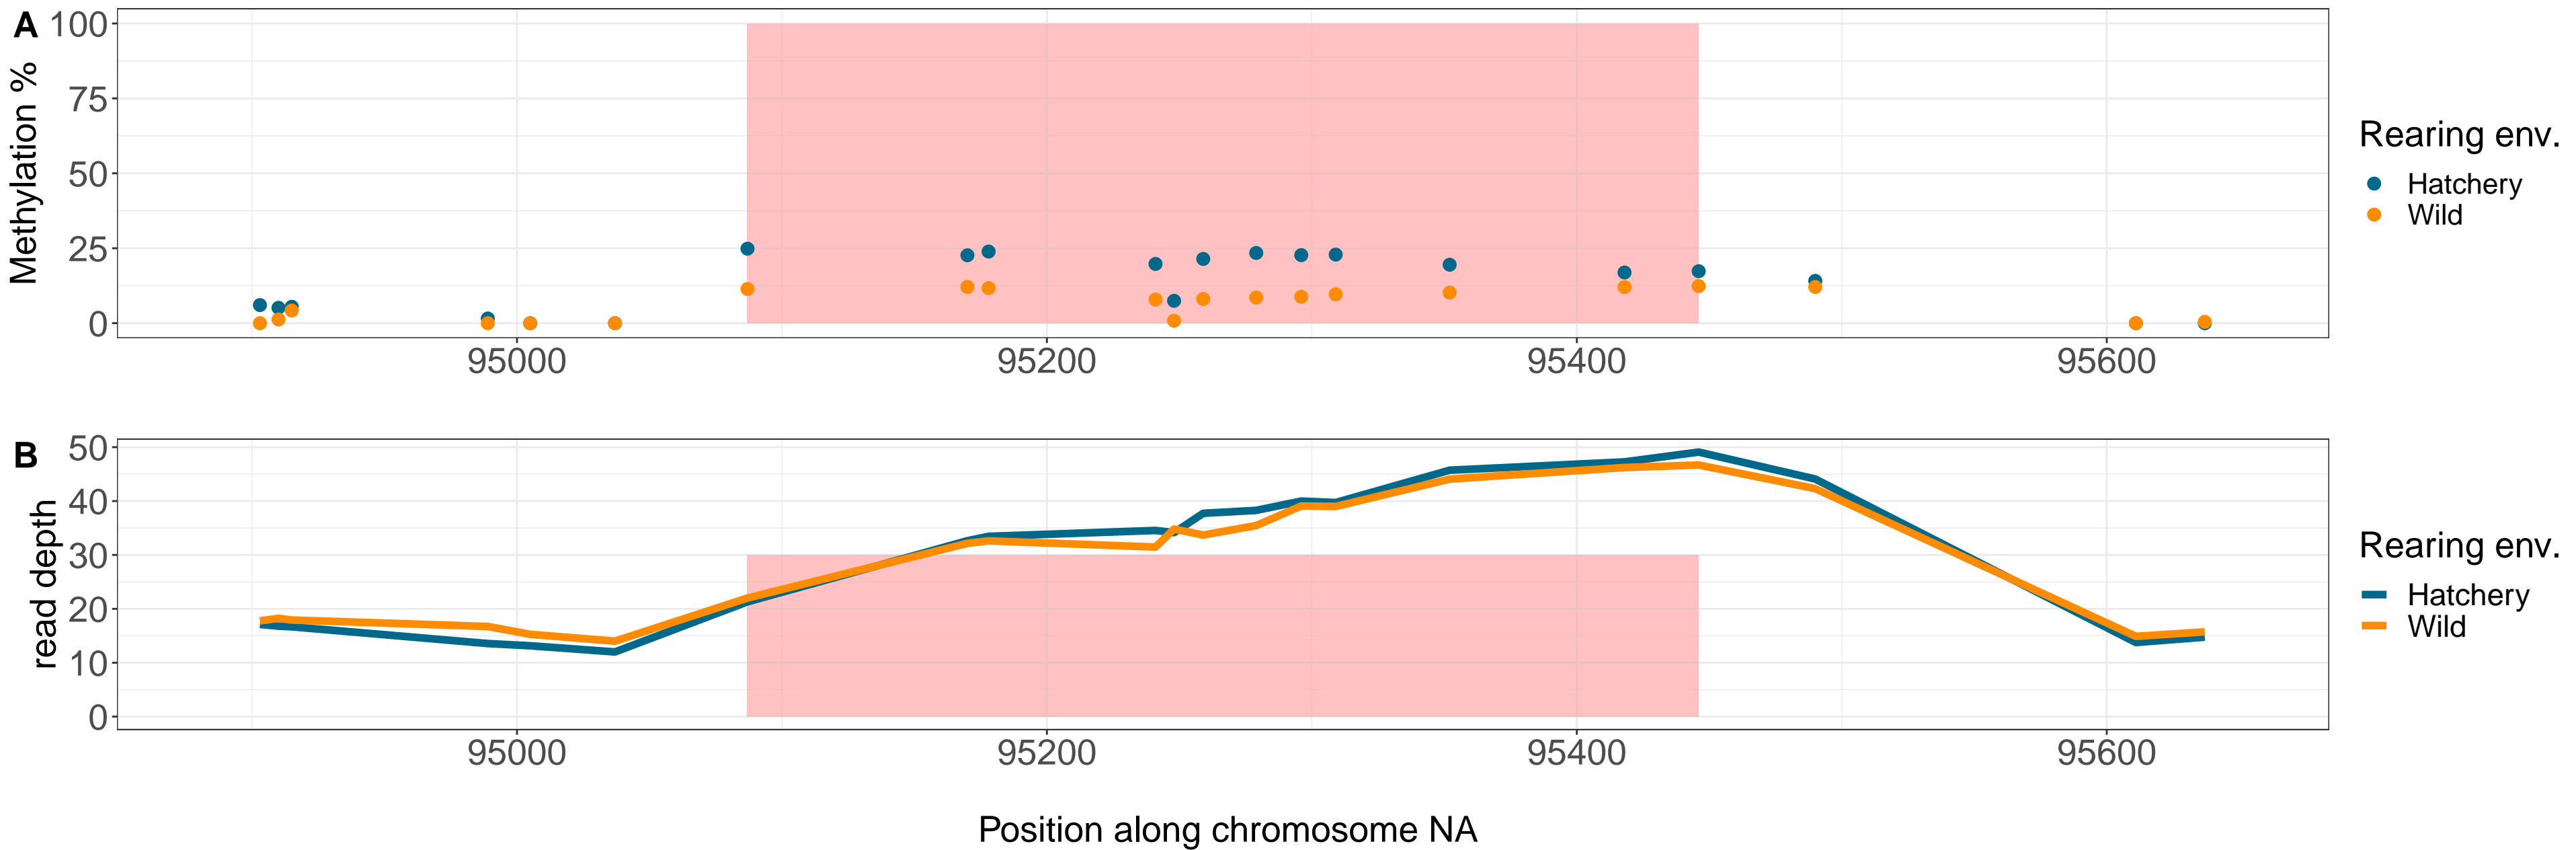



# DMR\_85

XM\_020454573.1

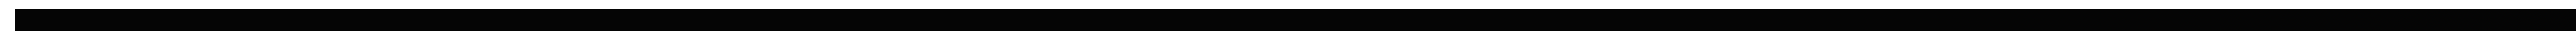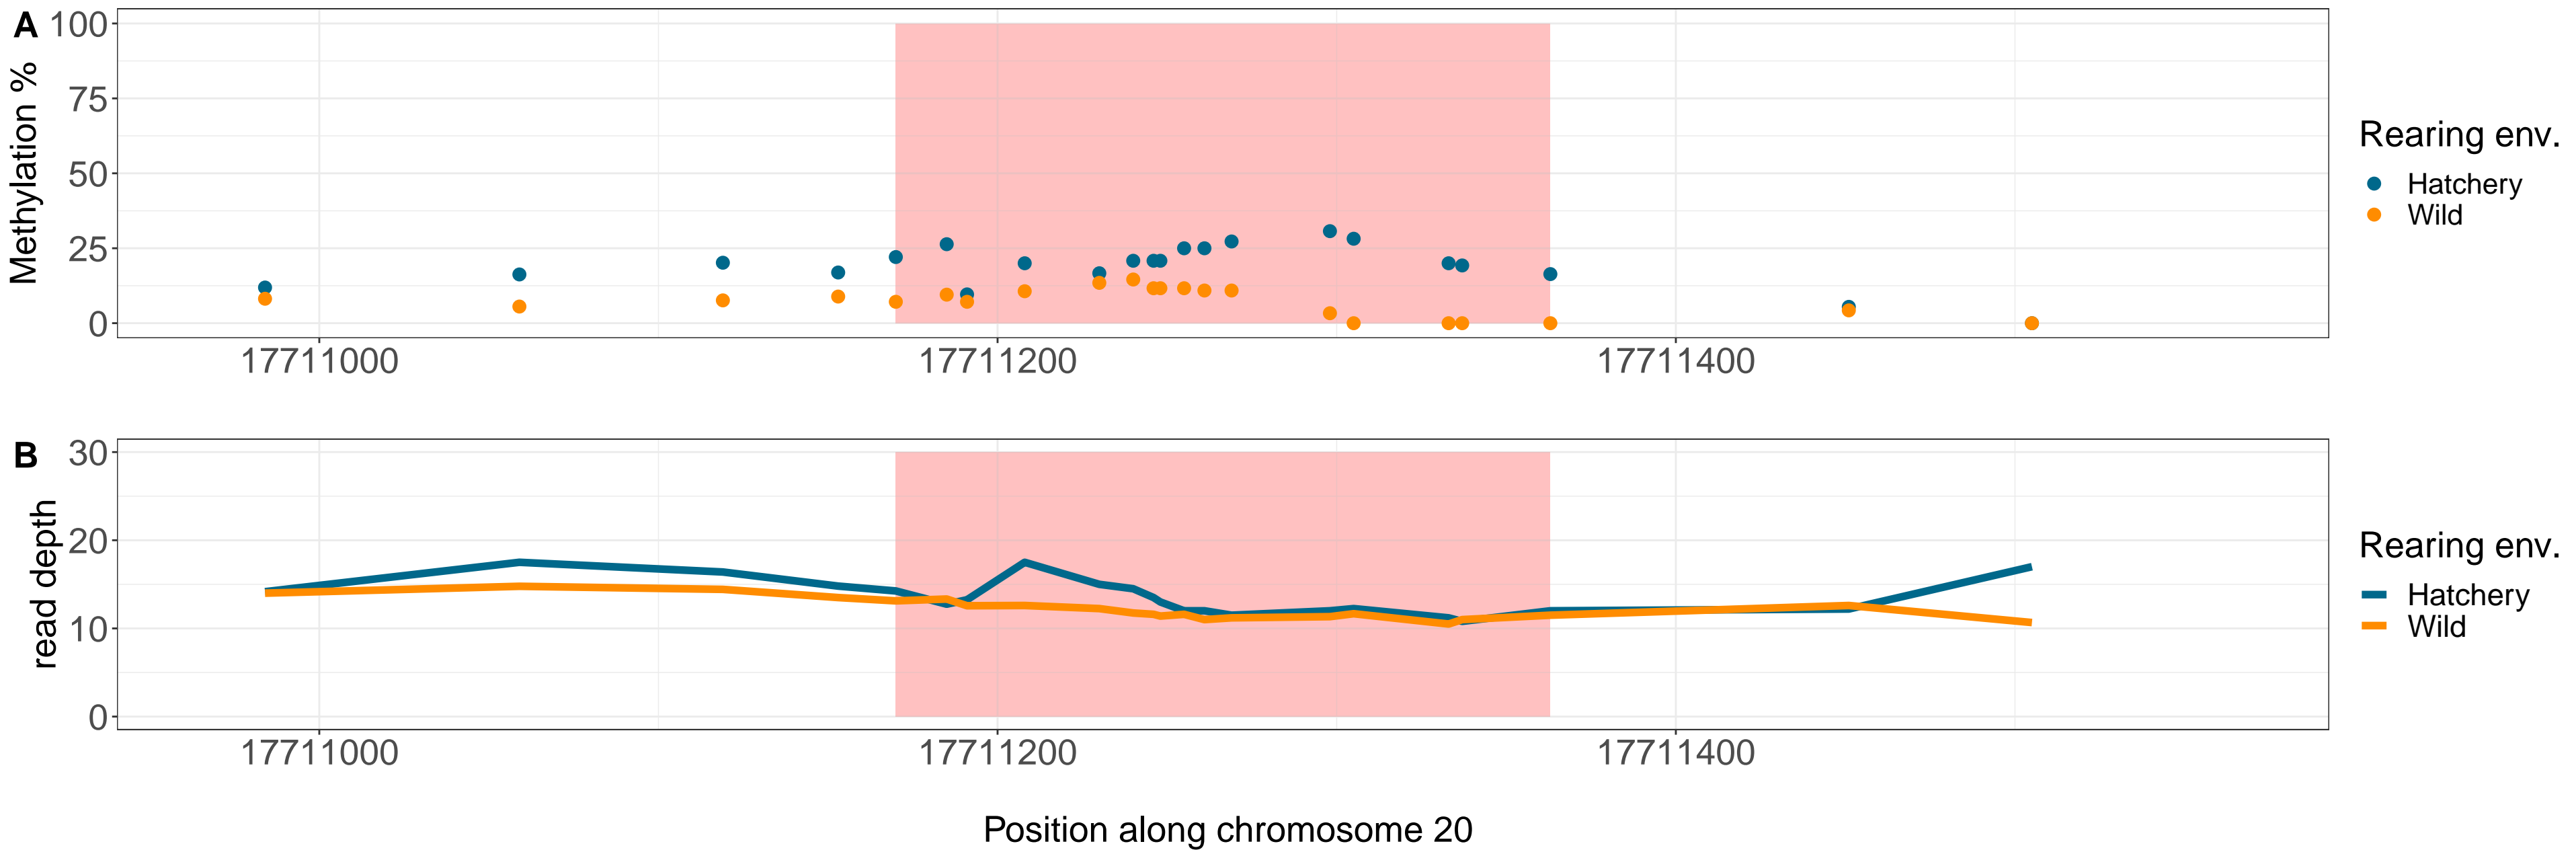

**A**

## DMR\_86

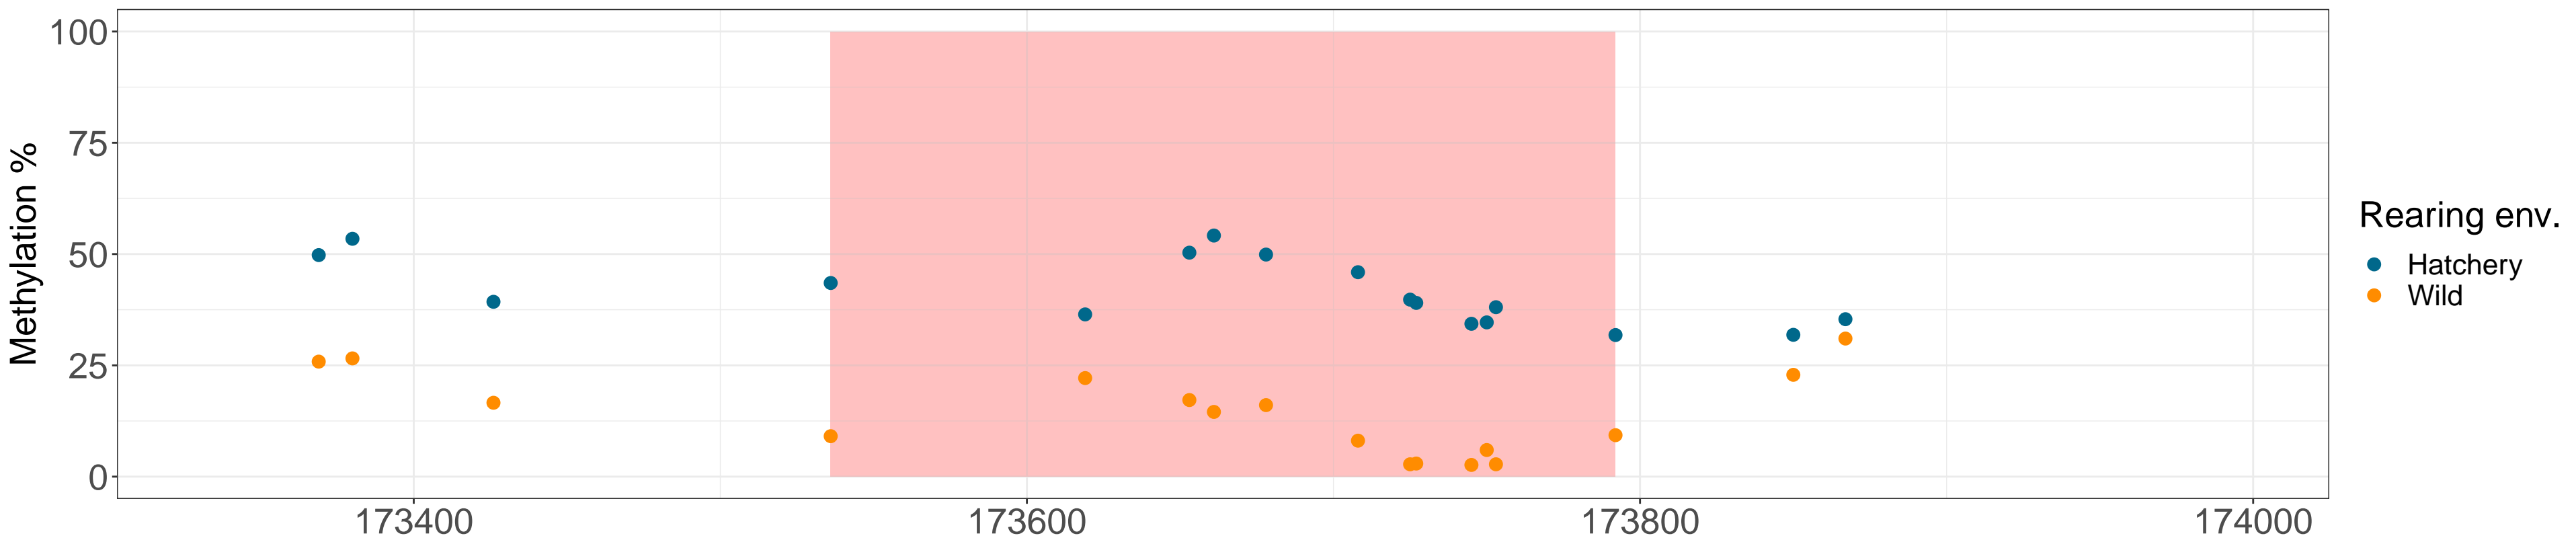**B**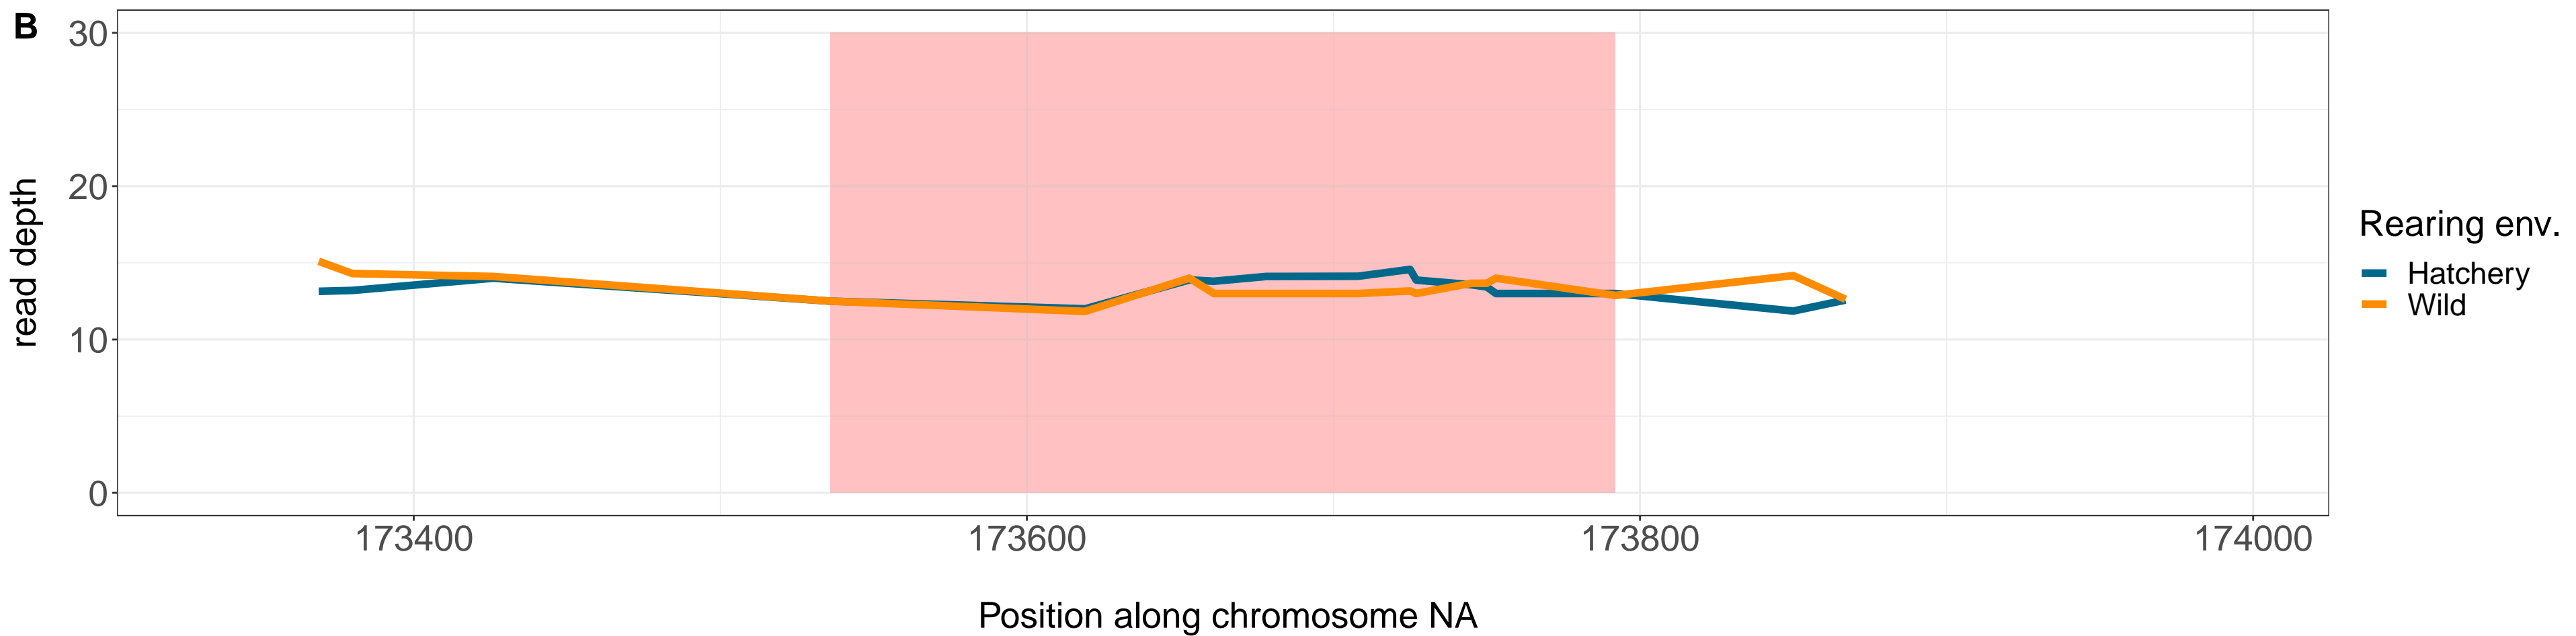

**A**

DMR\_87

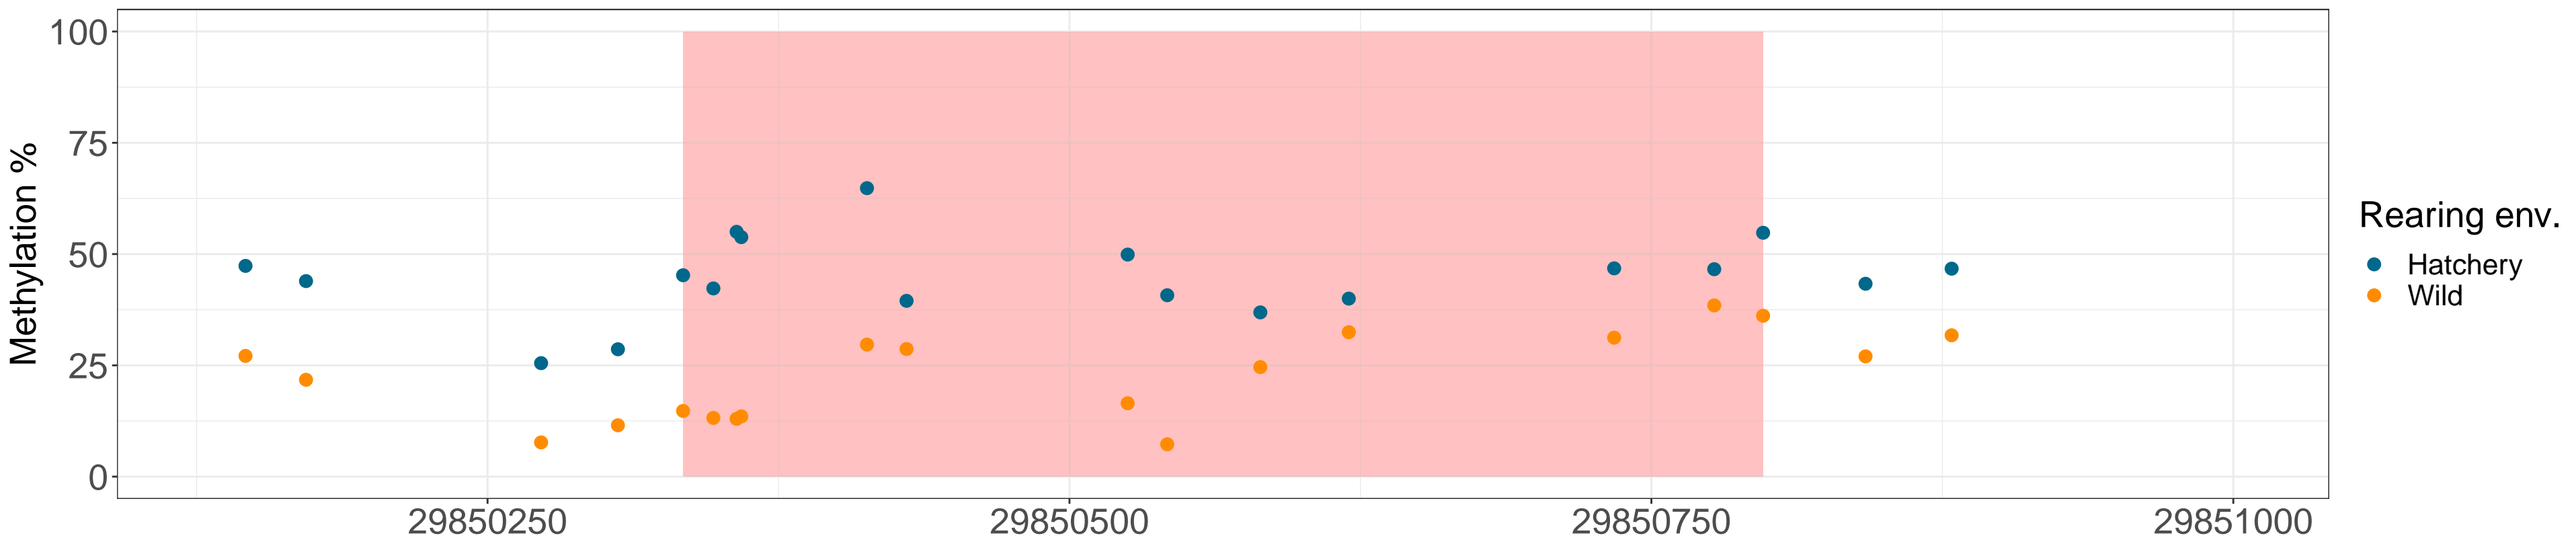**B**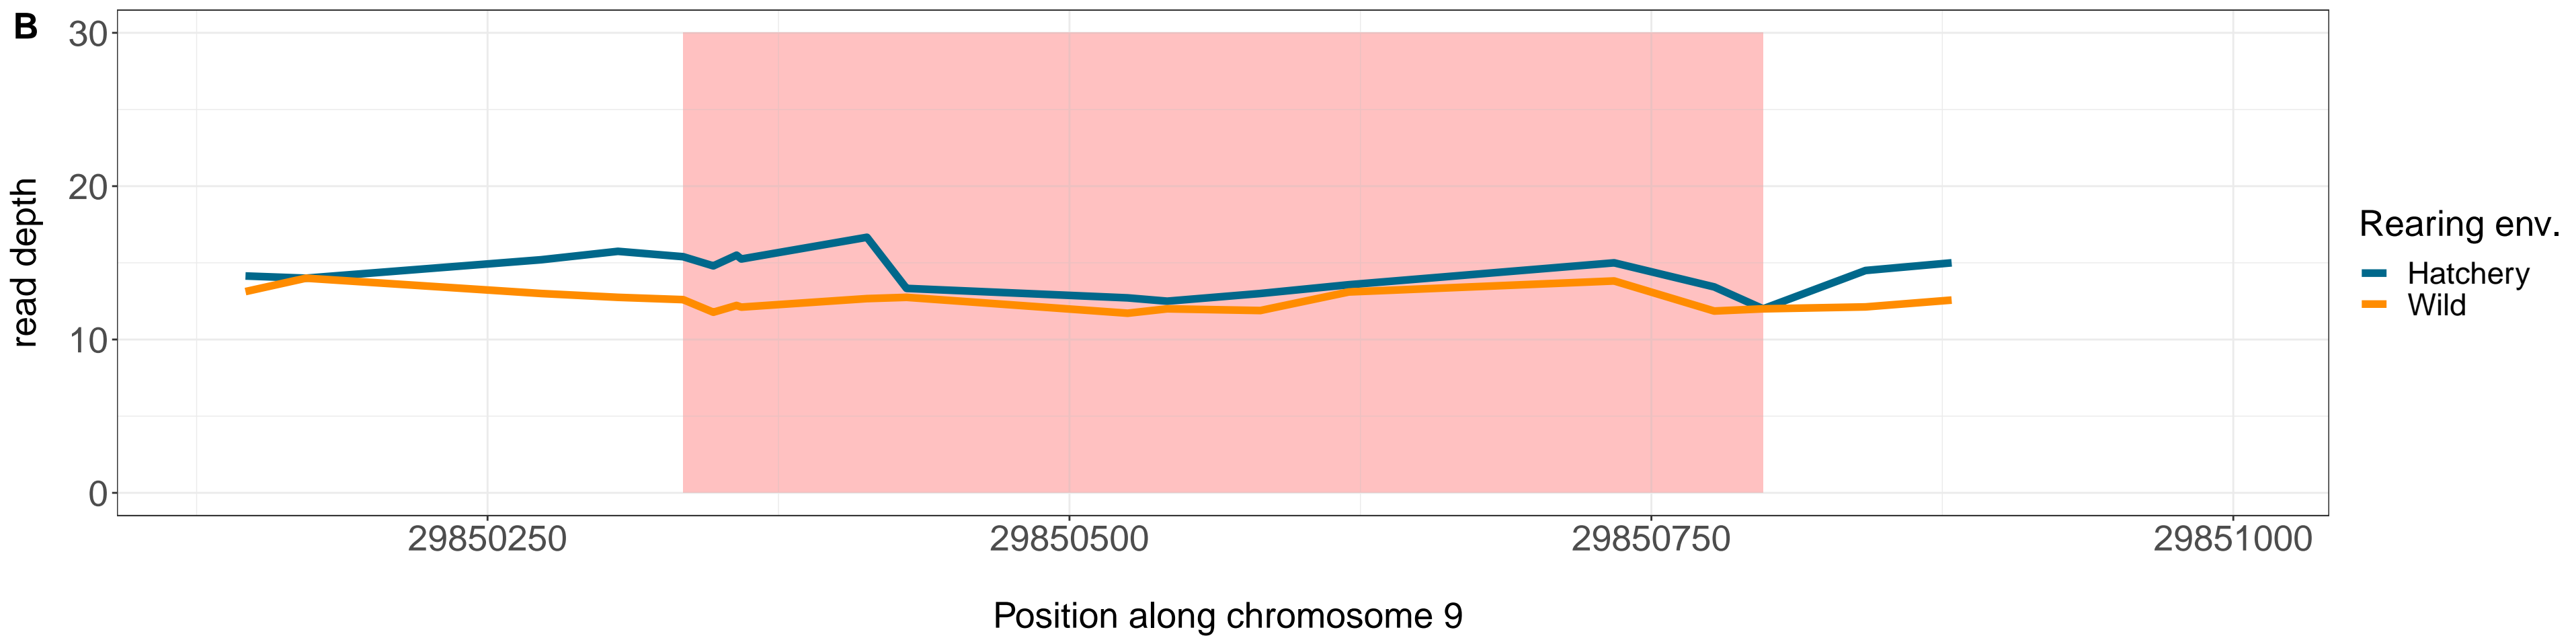

**A**

## DMR\_88

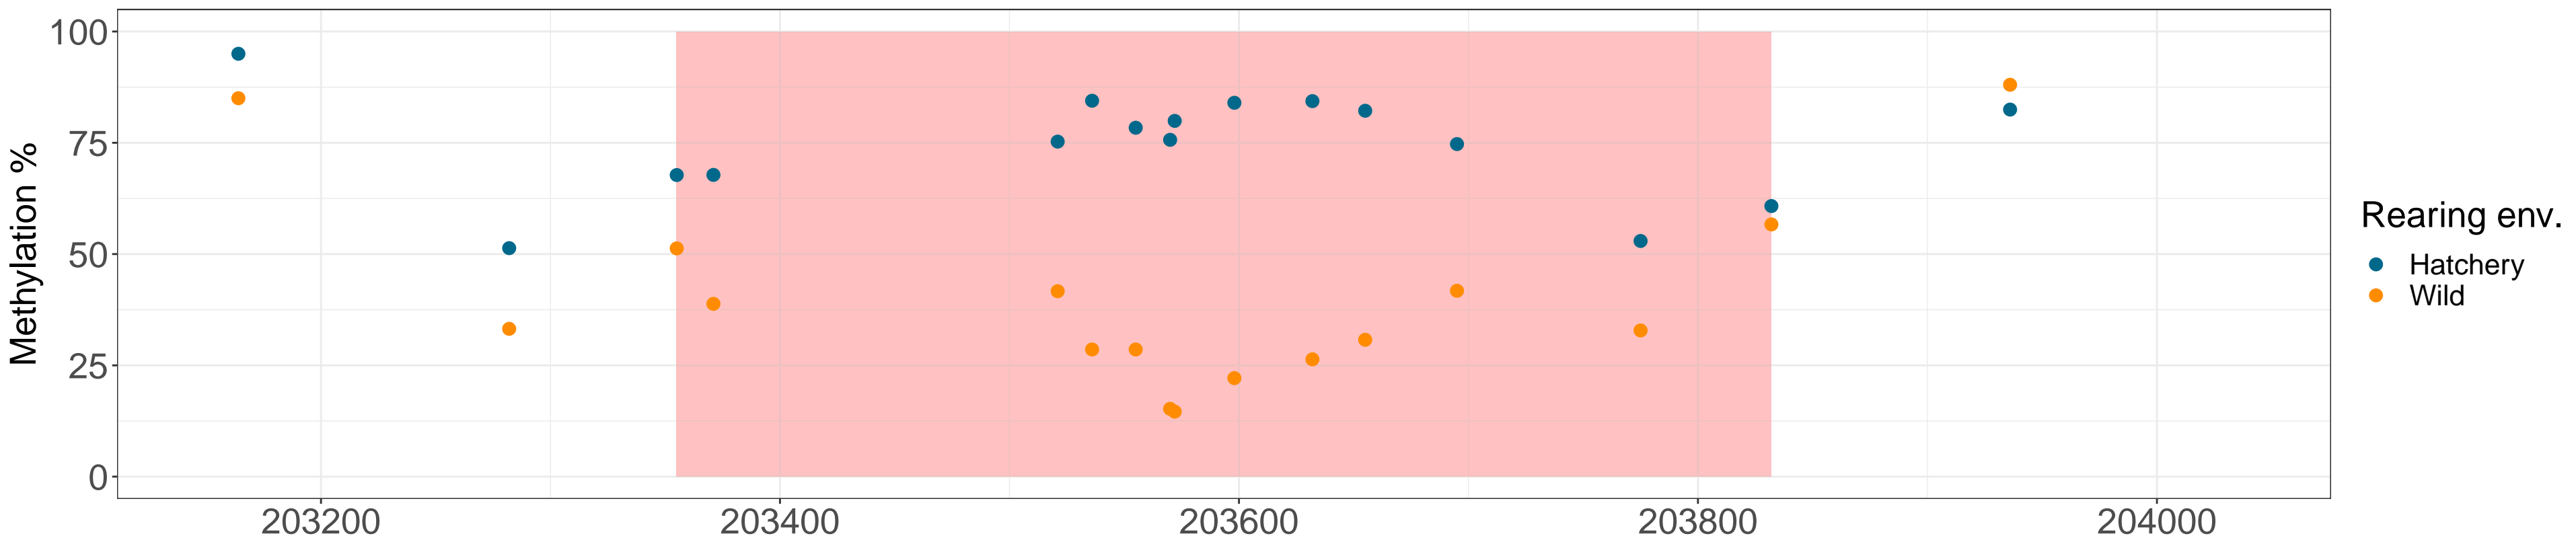**B**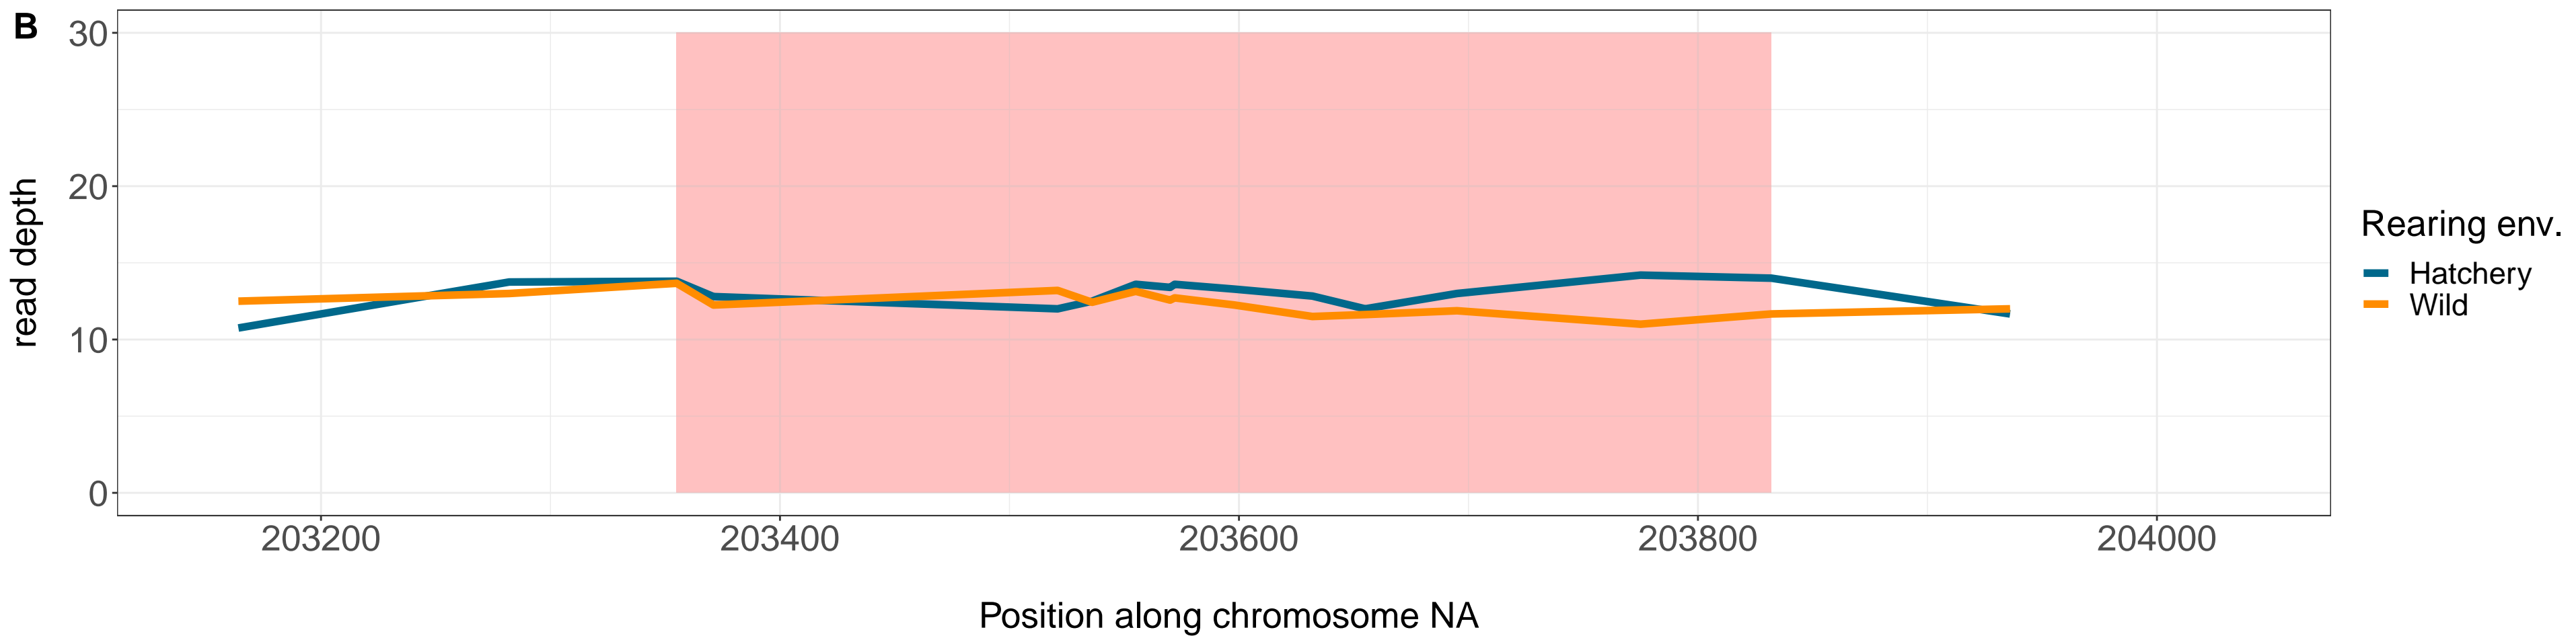

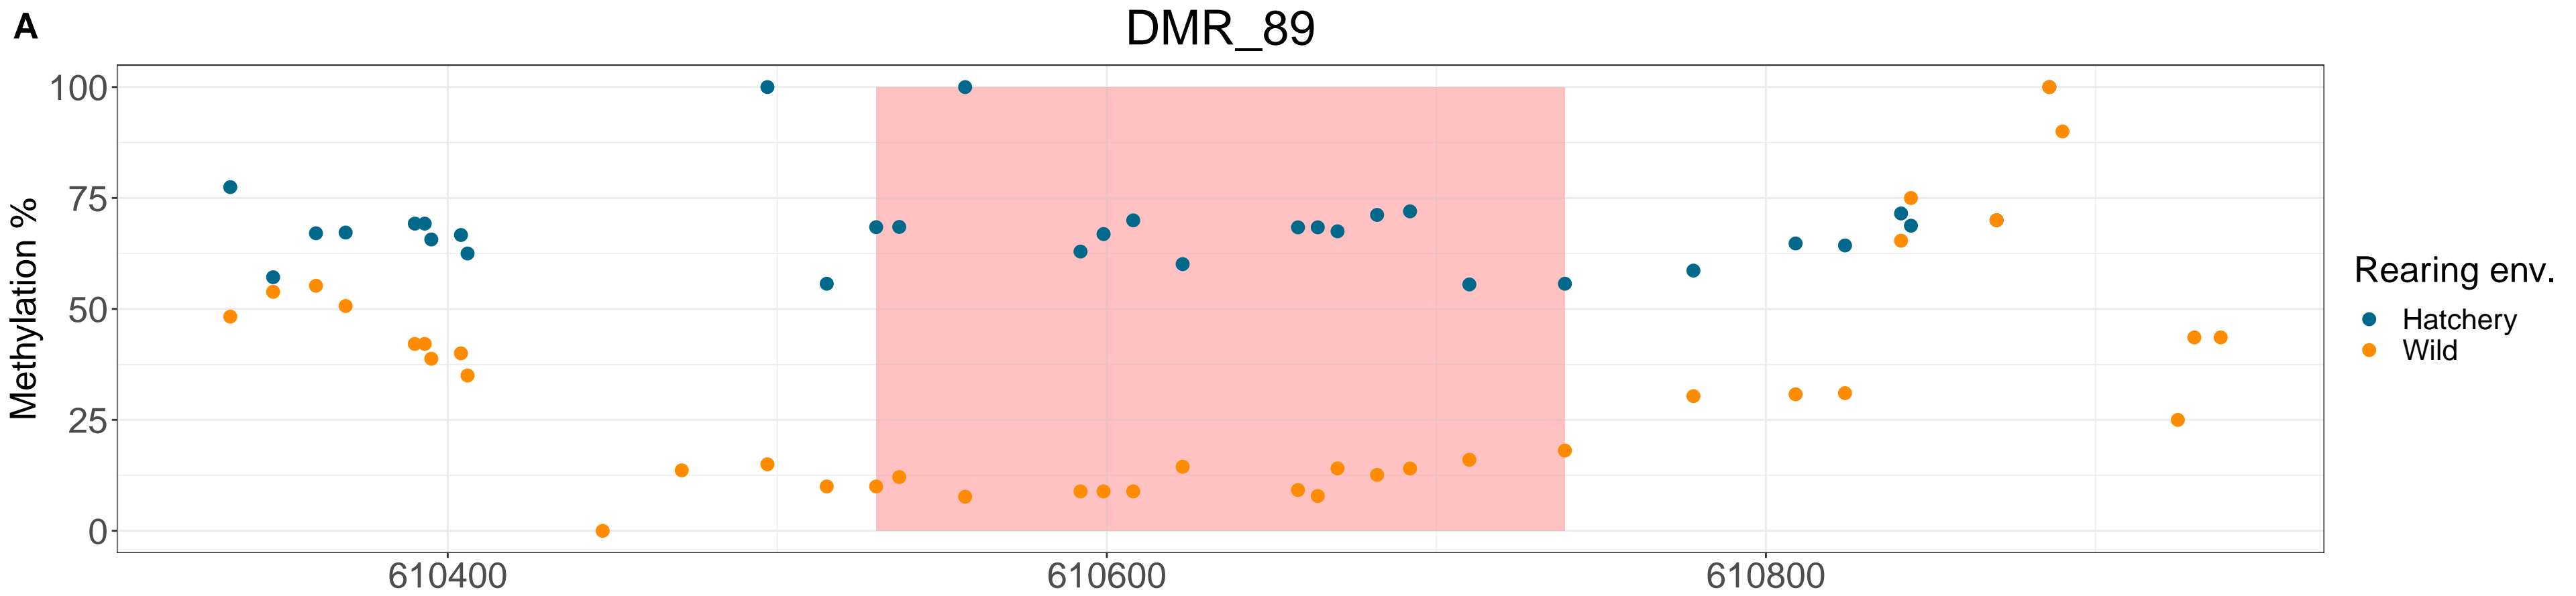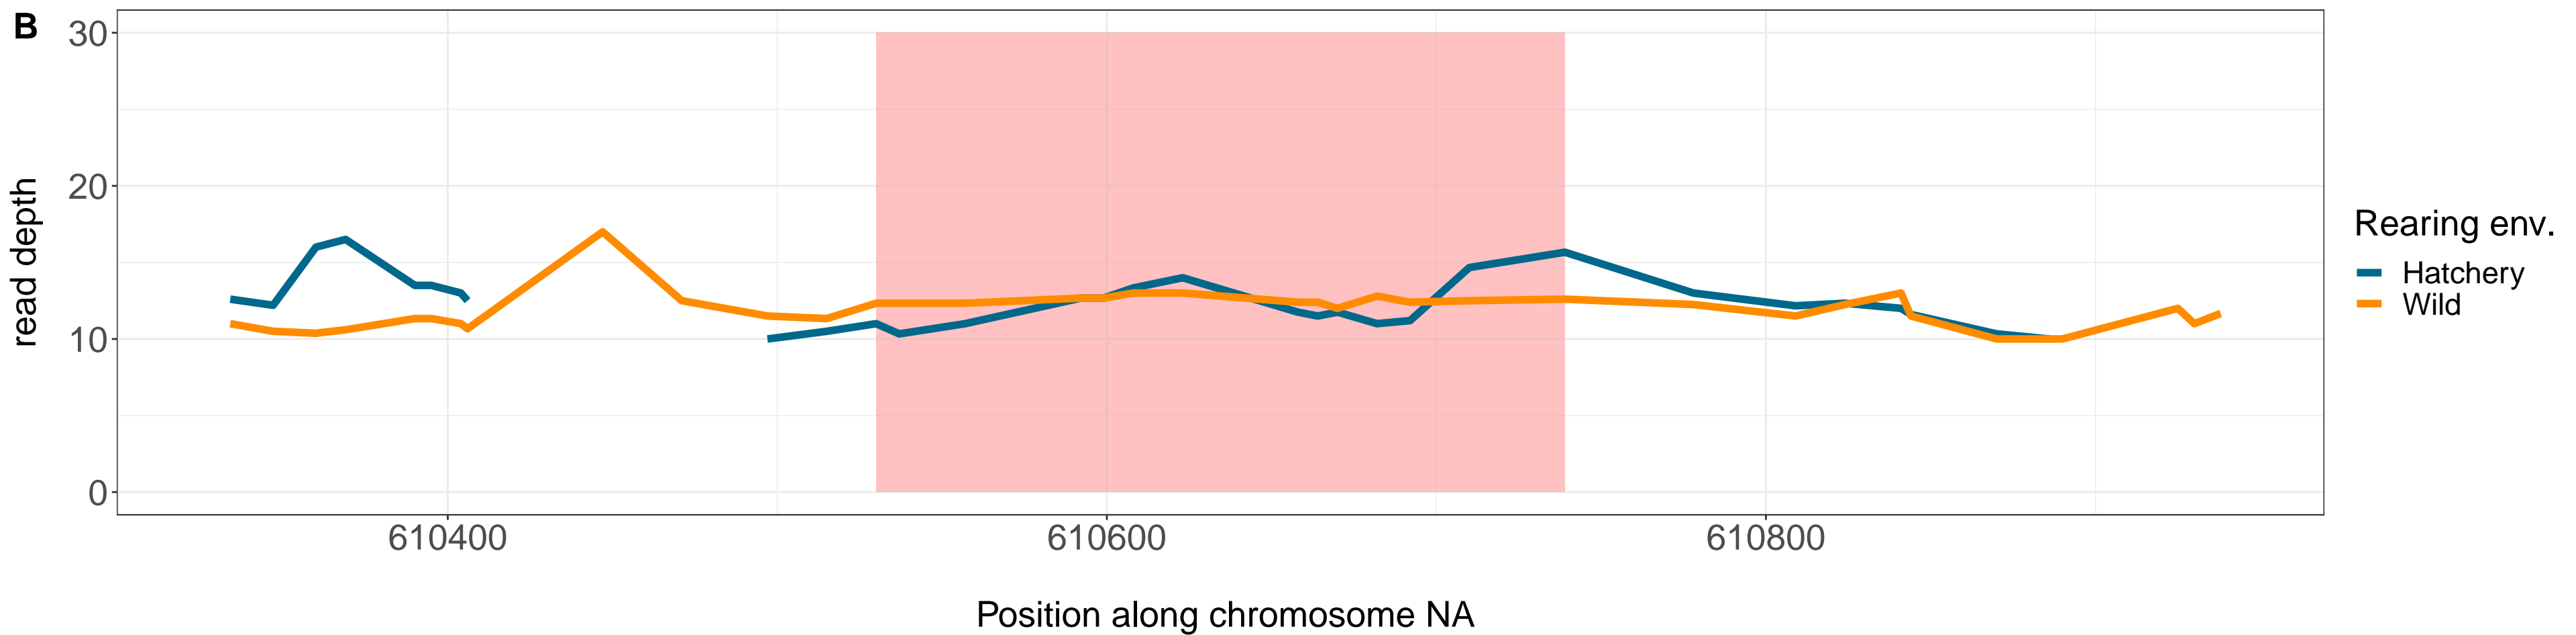

**A**

## DMR\_90

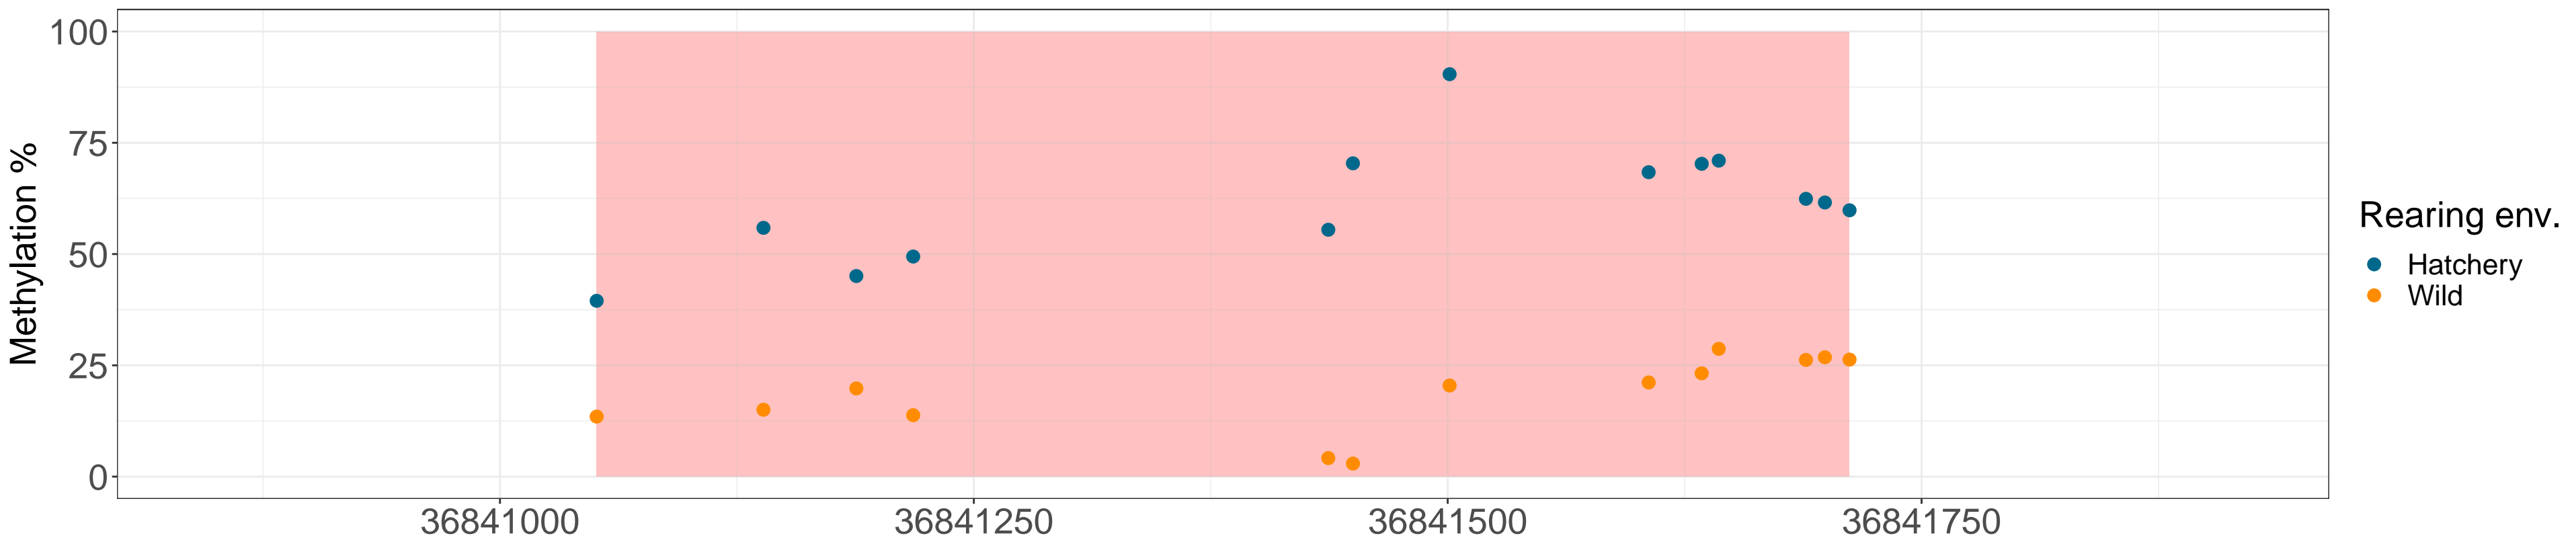**B**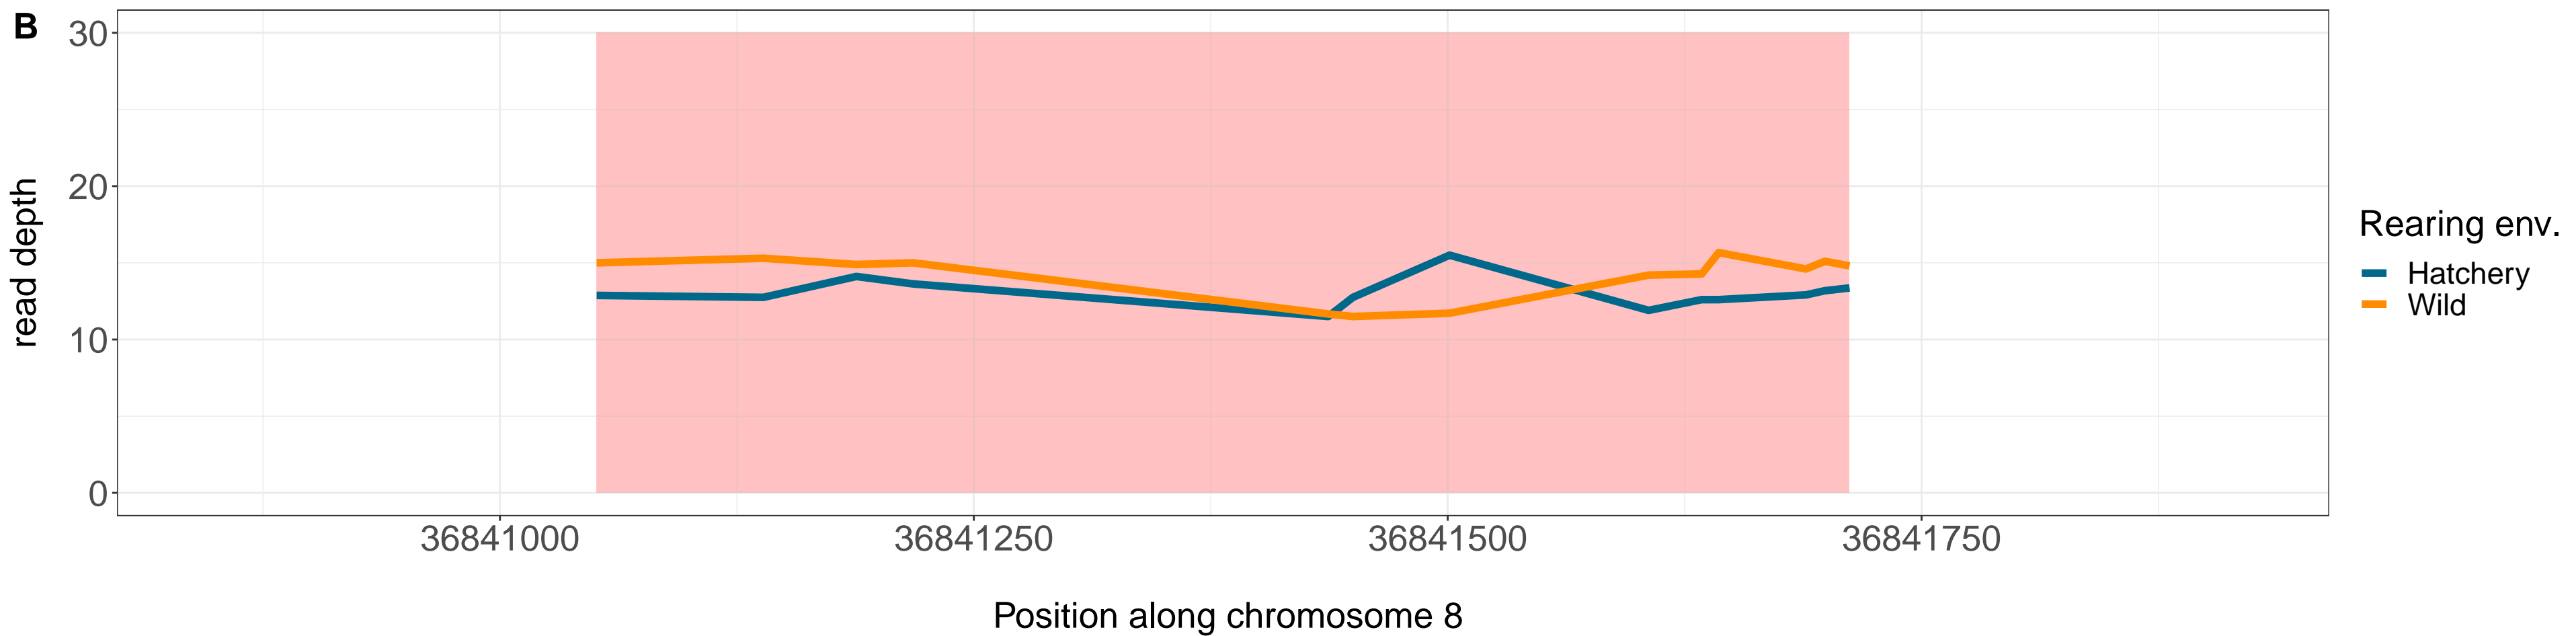

# DMR\_91

XM\_020464575.1

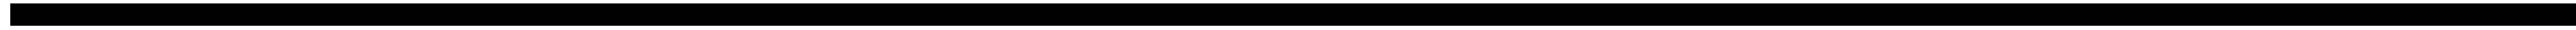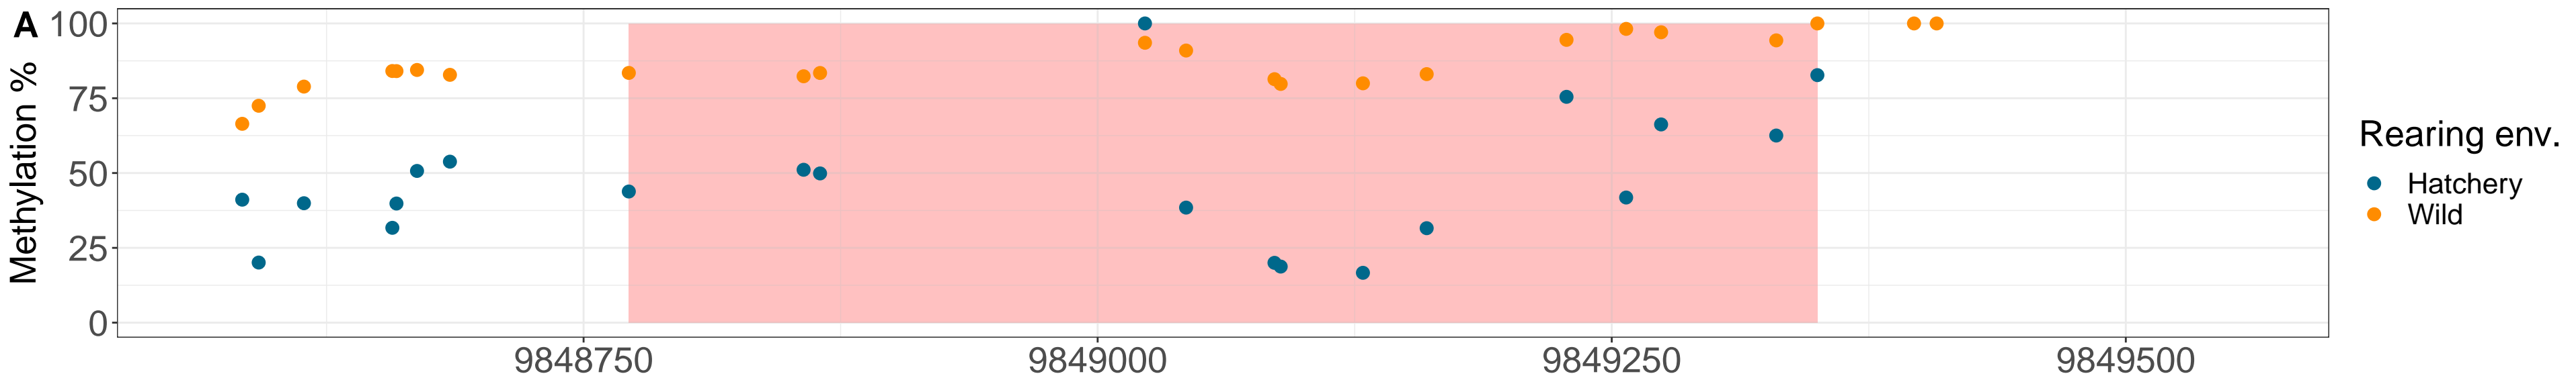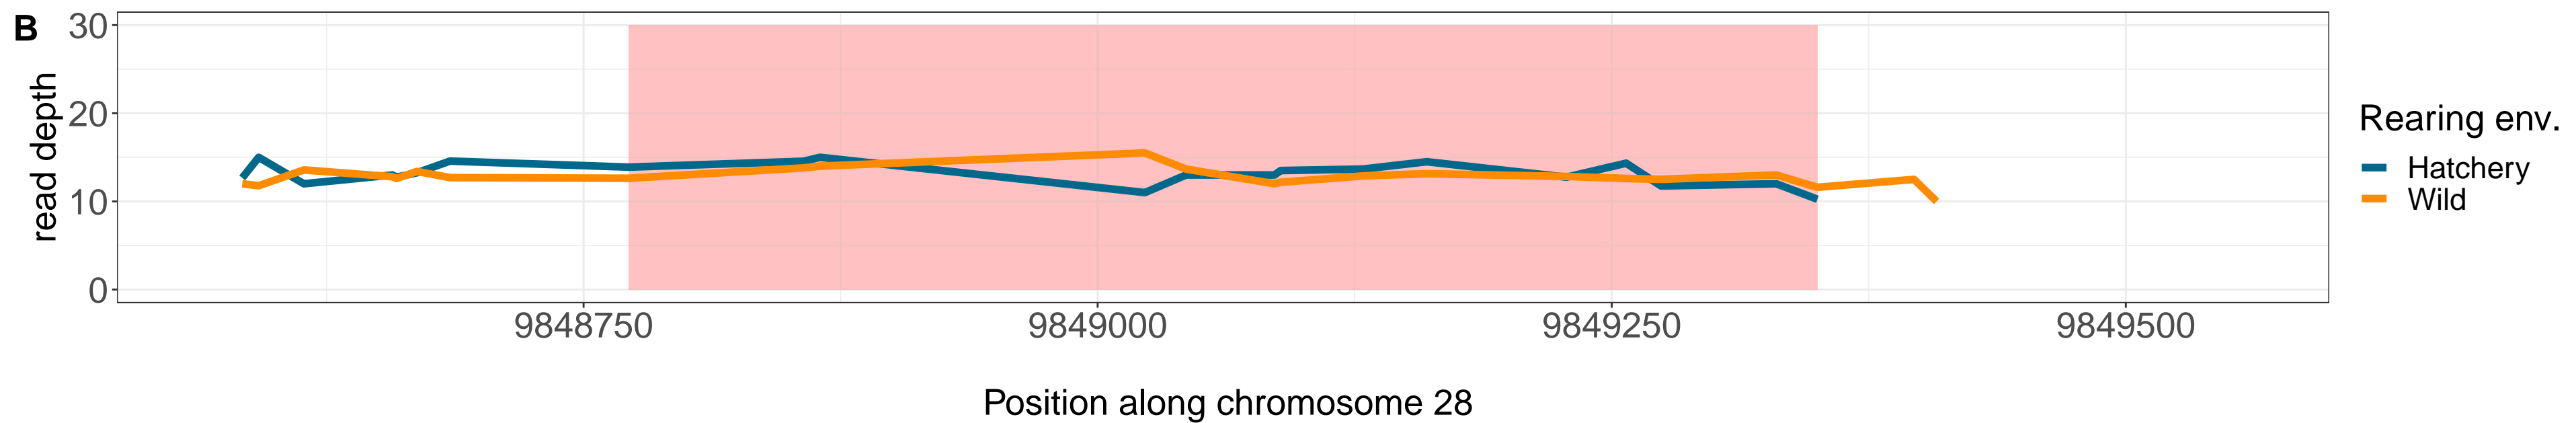

**A**

## DMR\_92

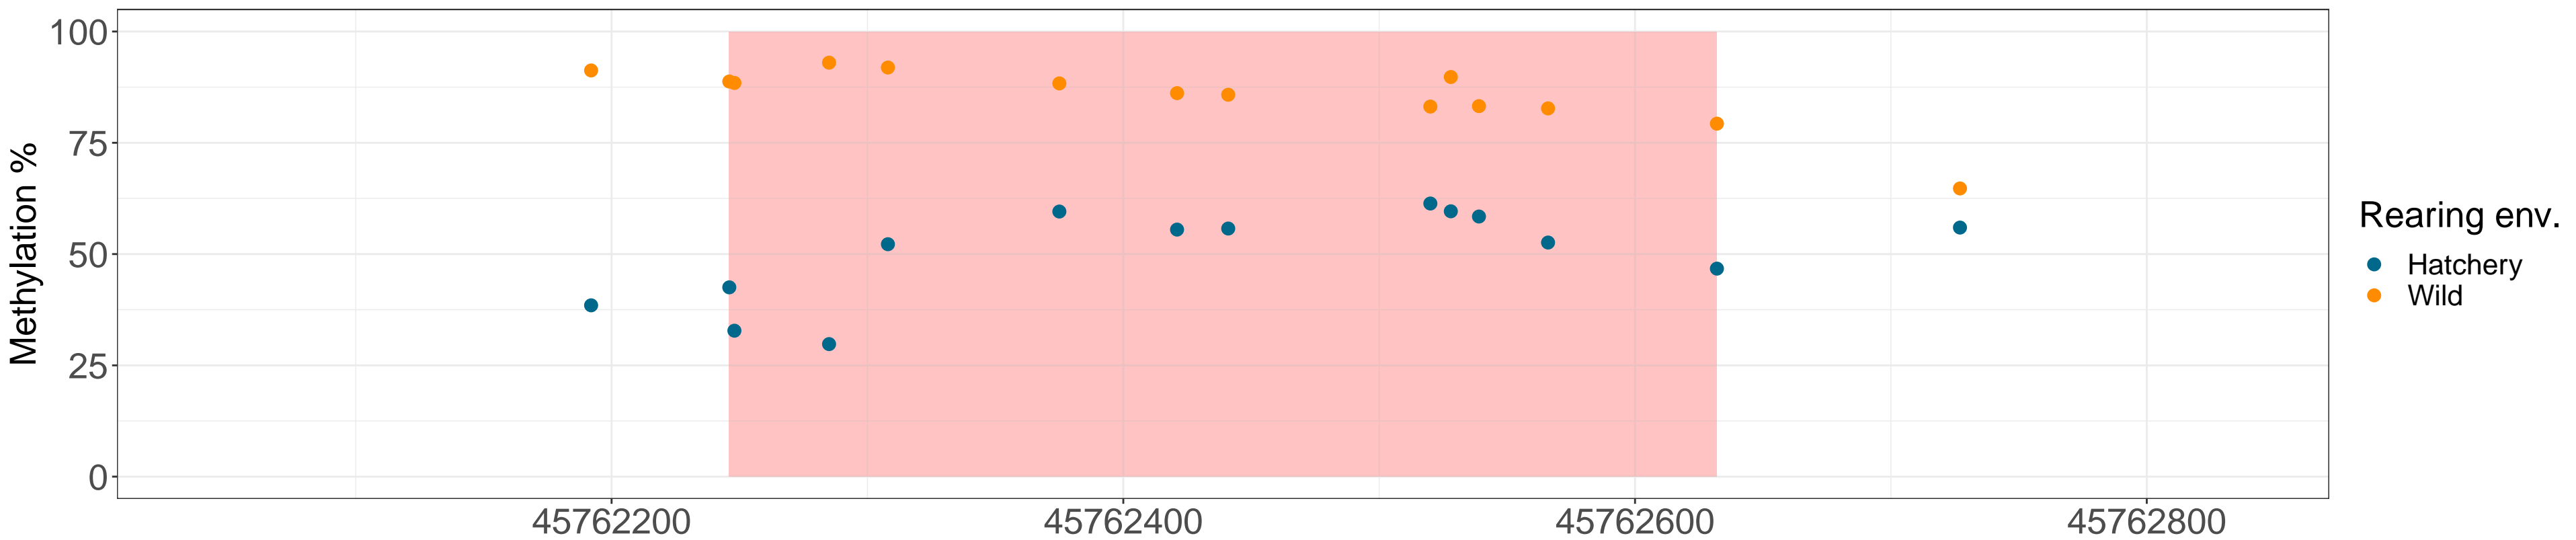**B**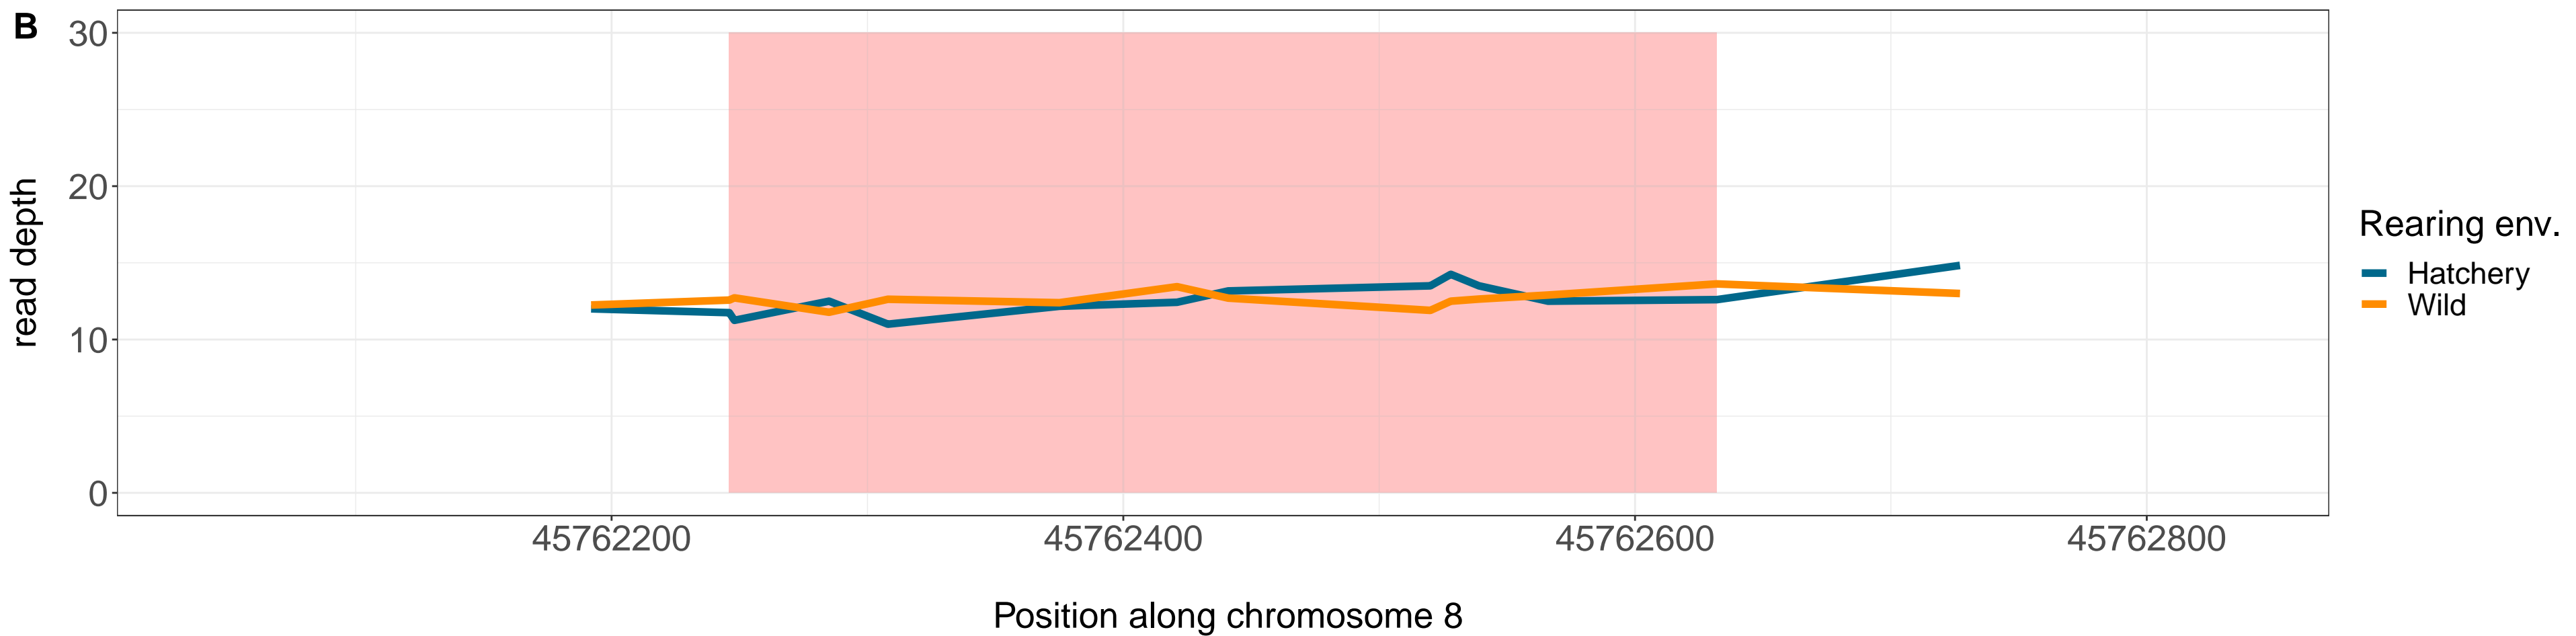



# DMR\_93

XM\_020498556.1

XM\_020498557.1

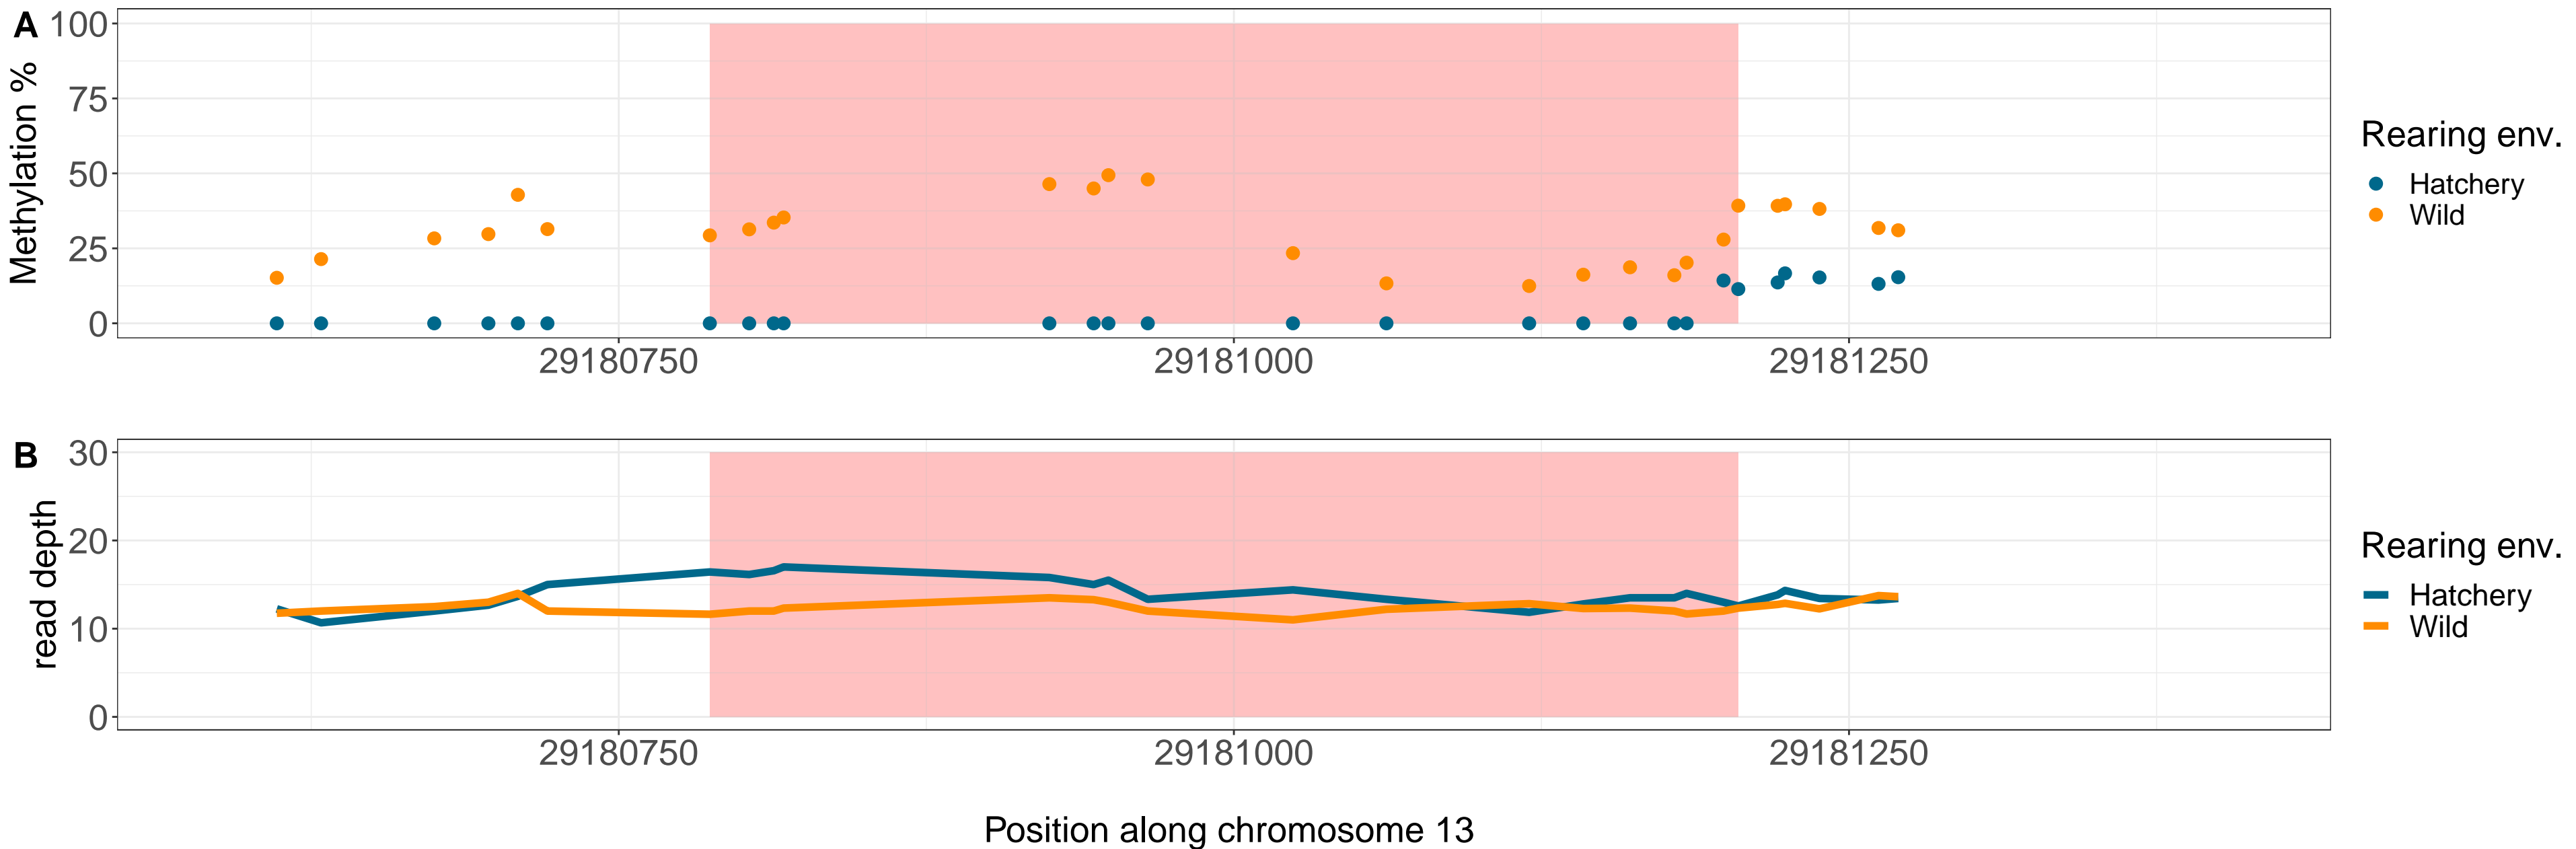

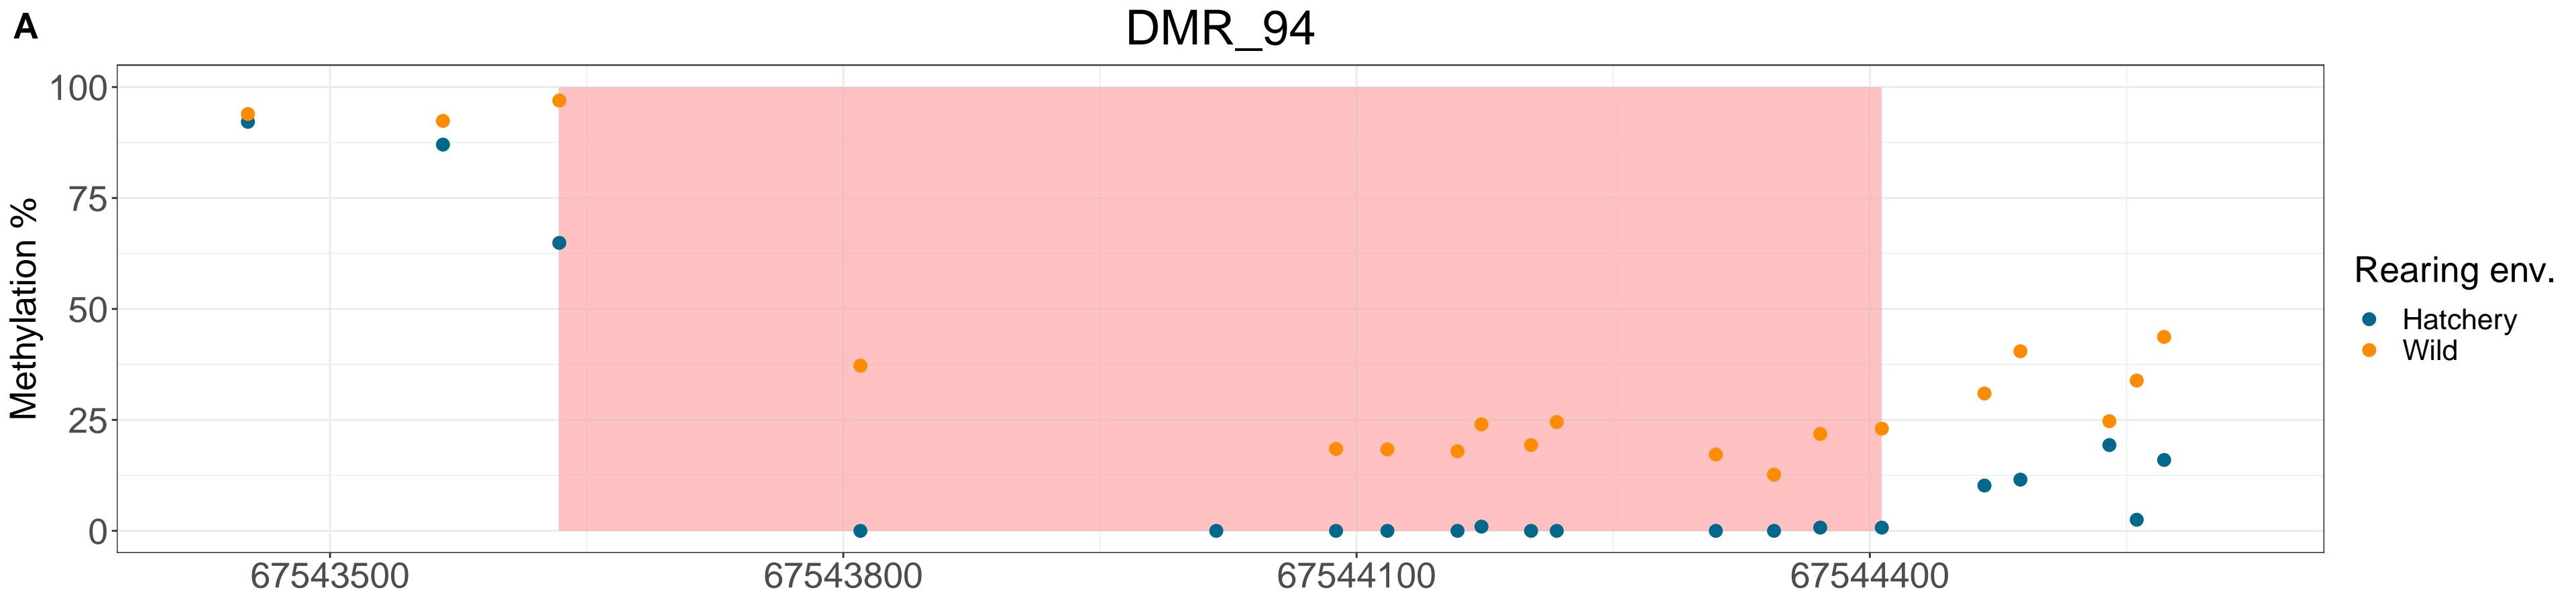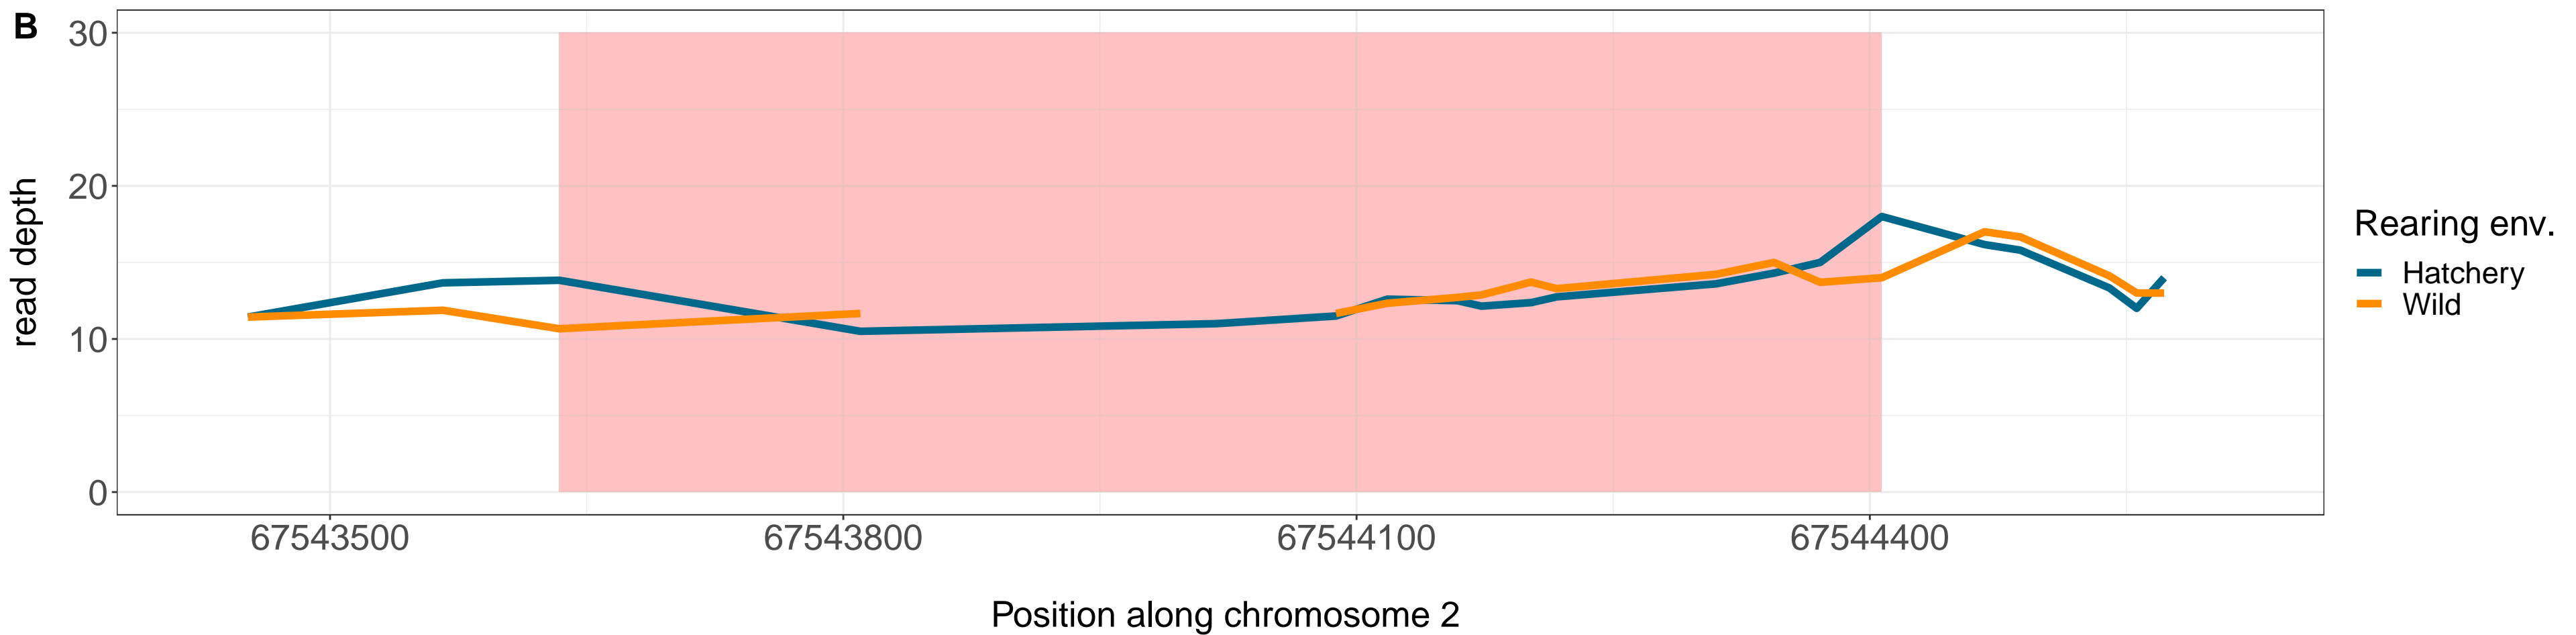

# DMR\_95

XM\_020483674.1

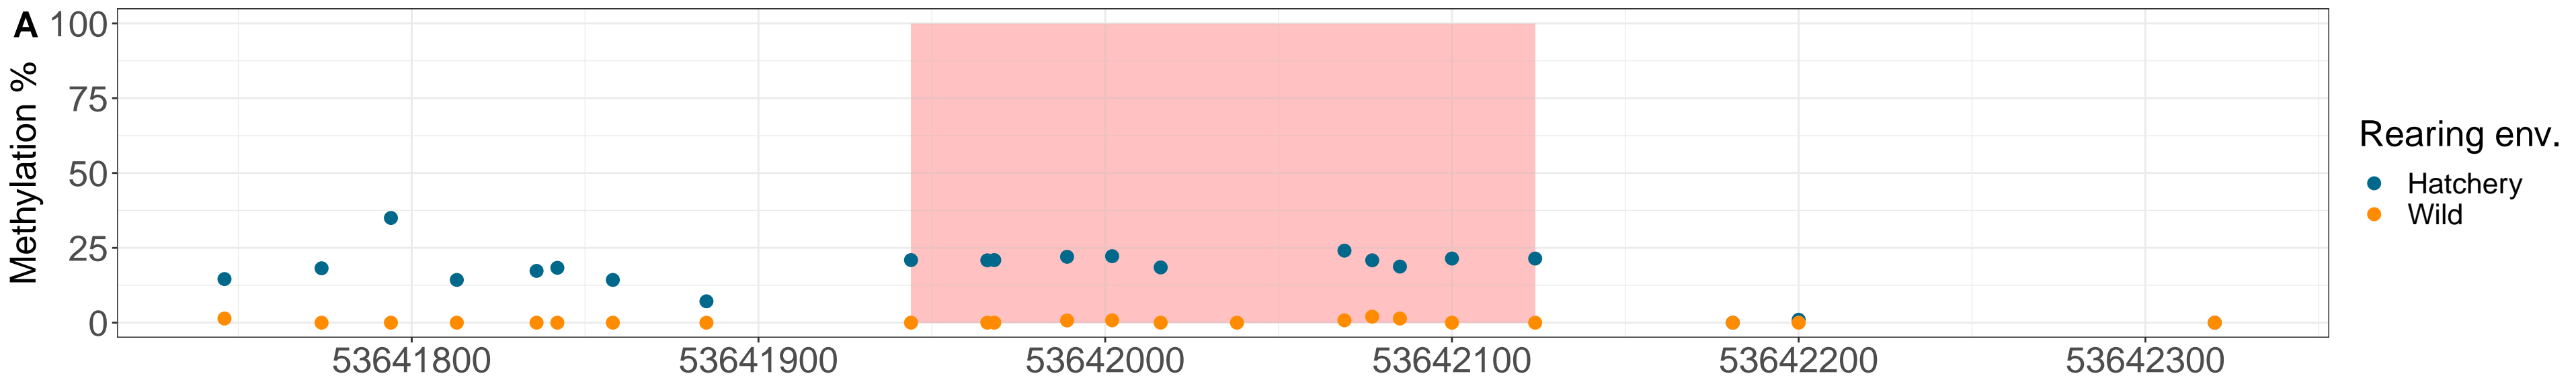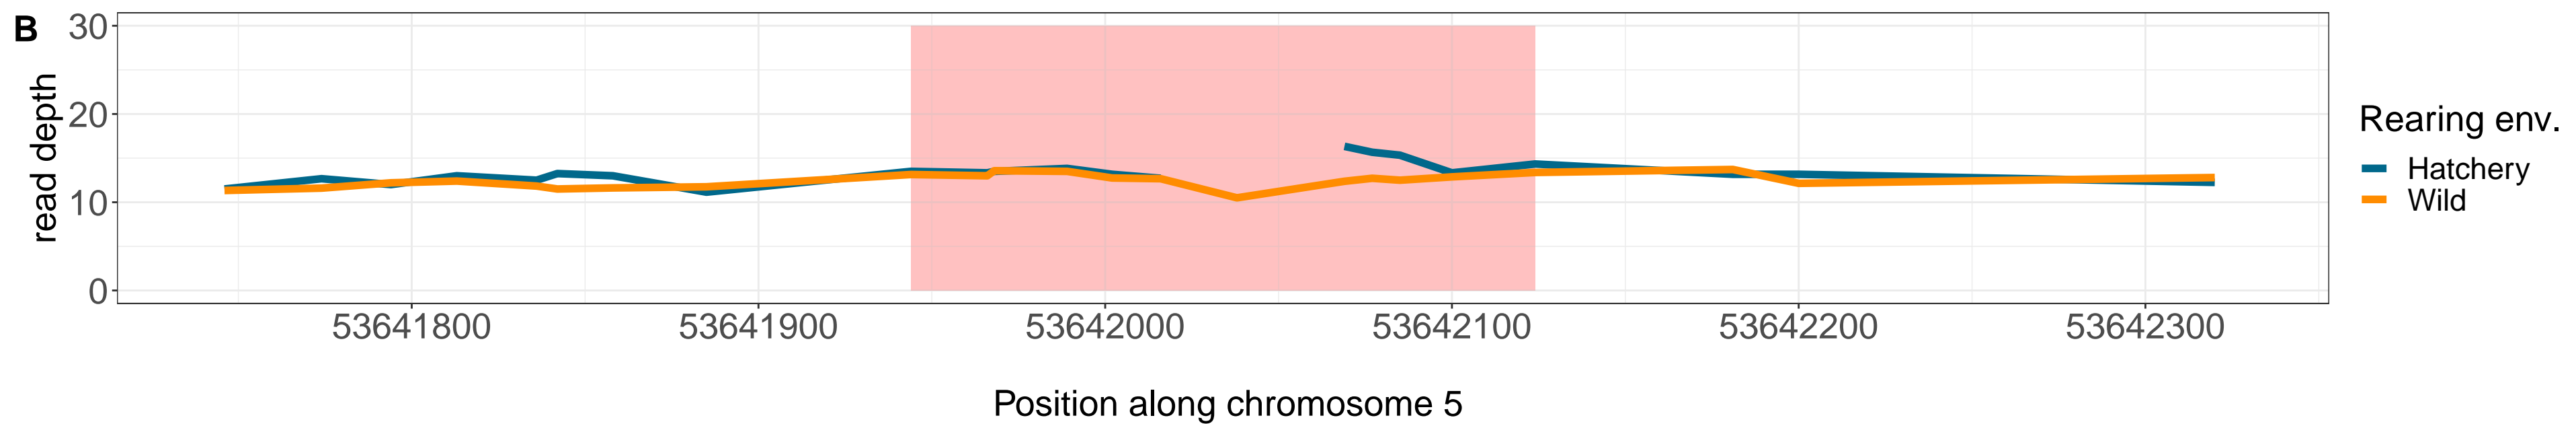

**A**

## DMR\_96

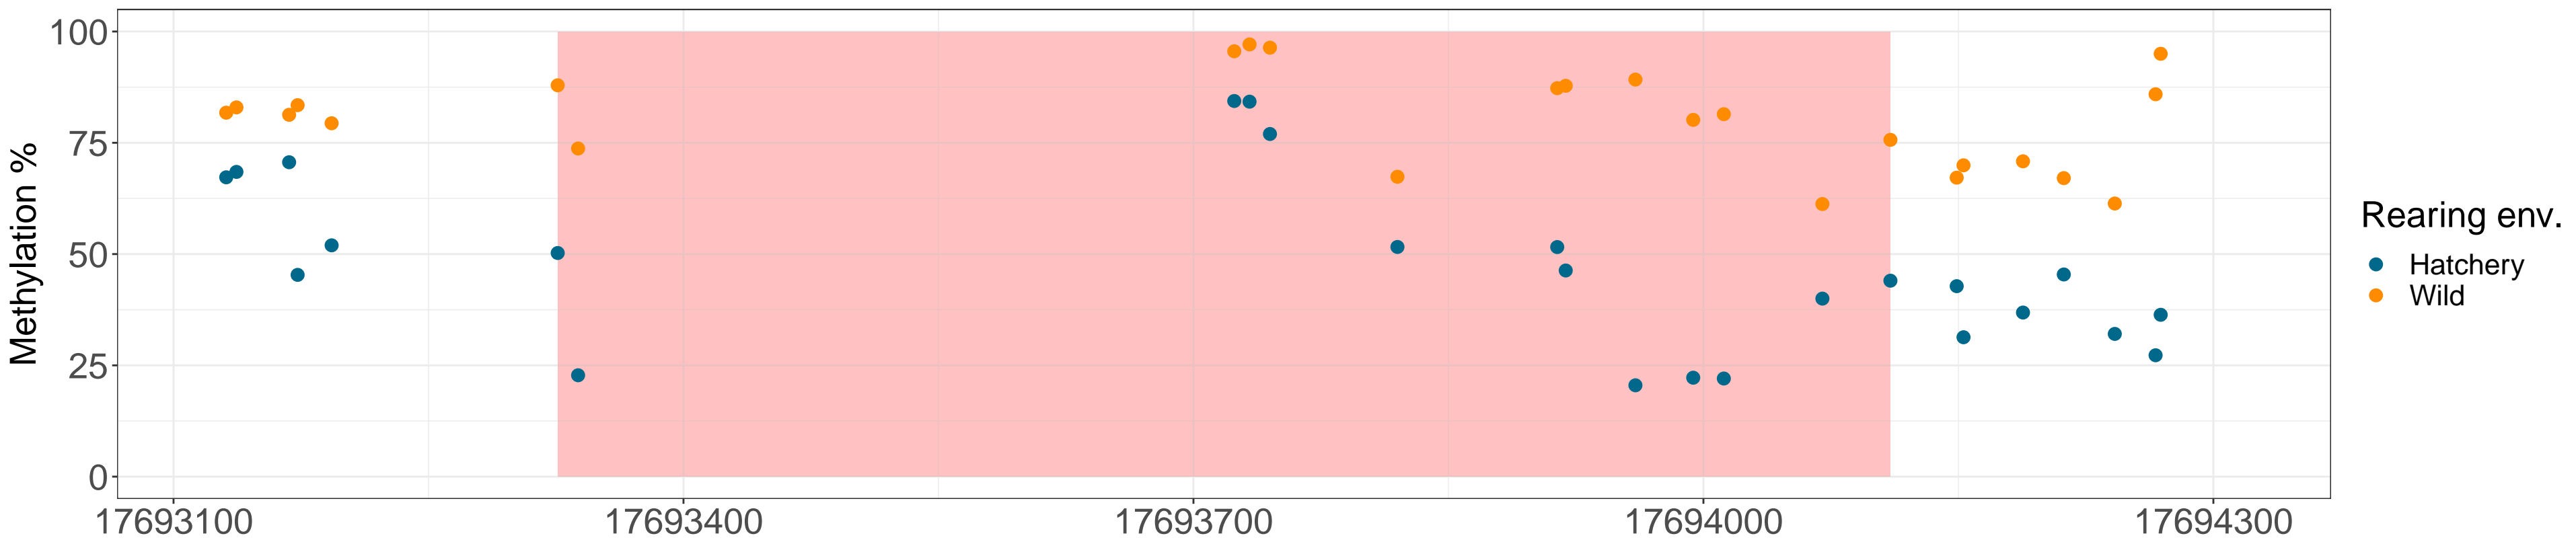**B**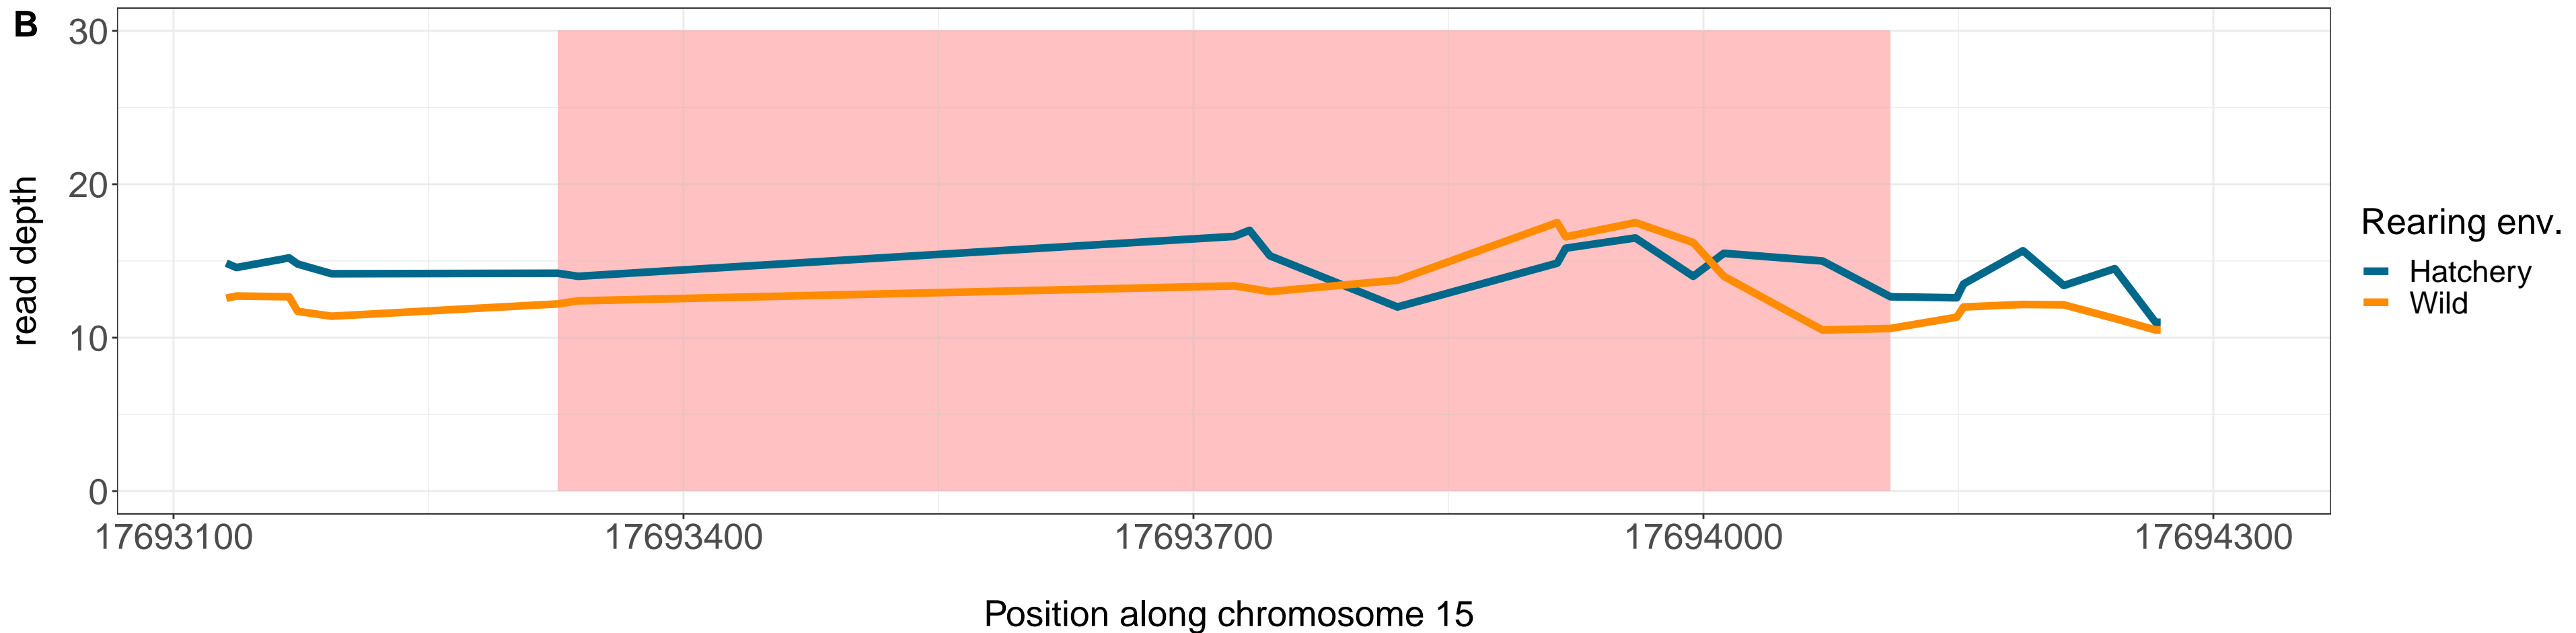

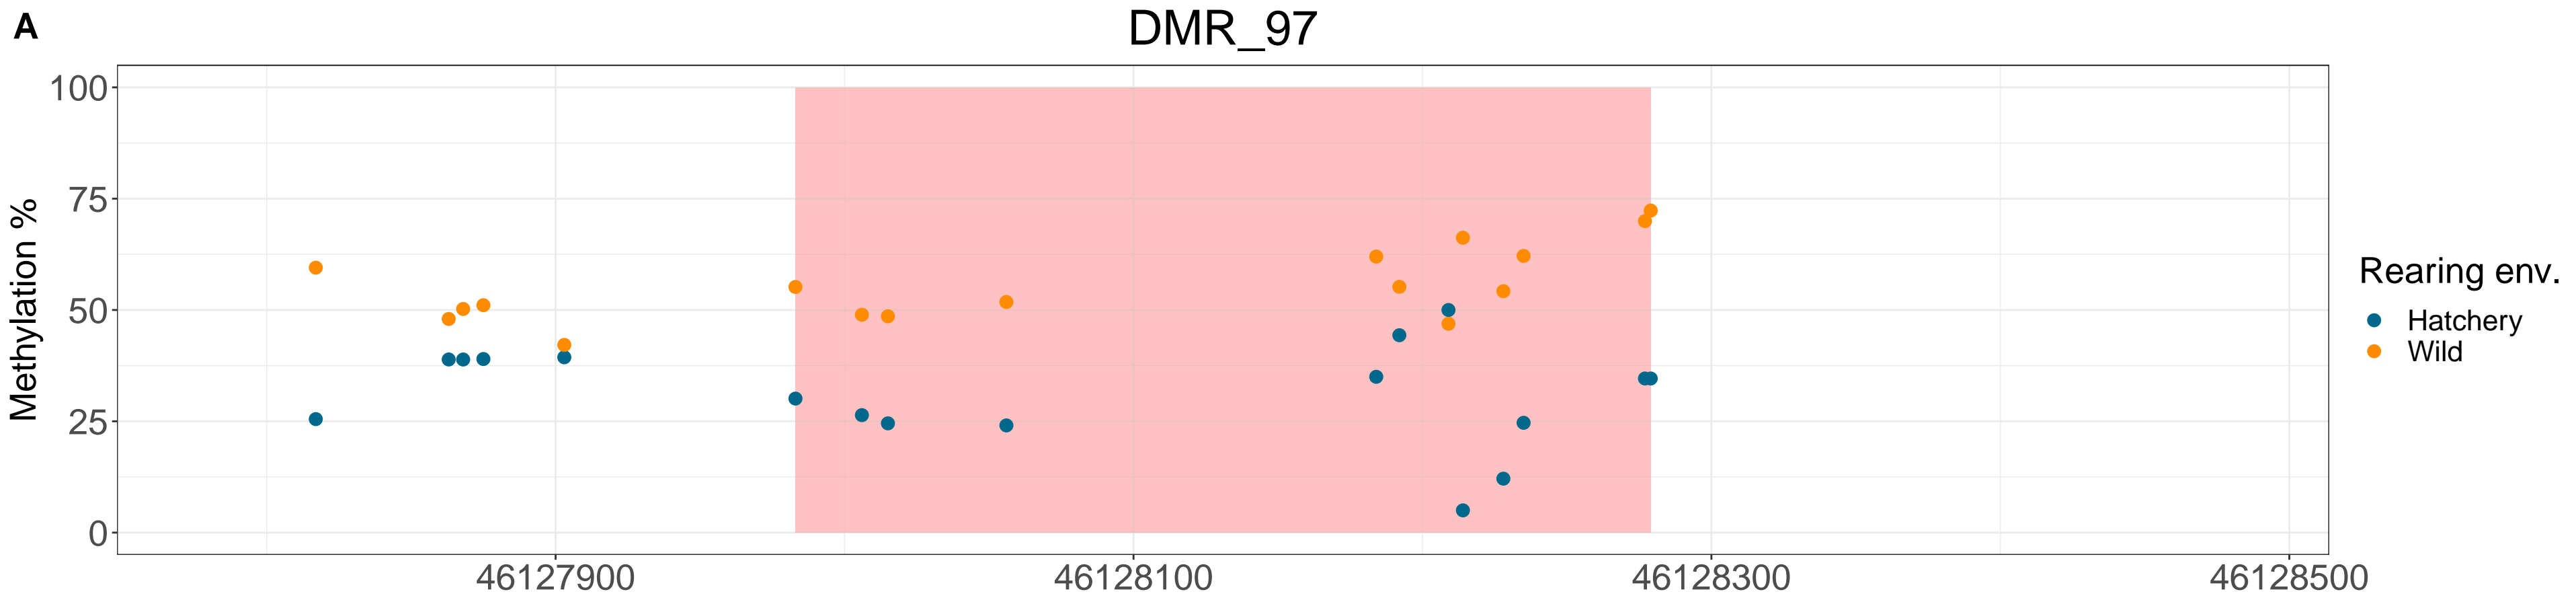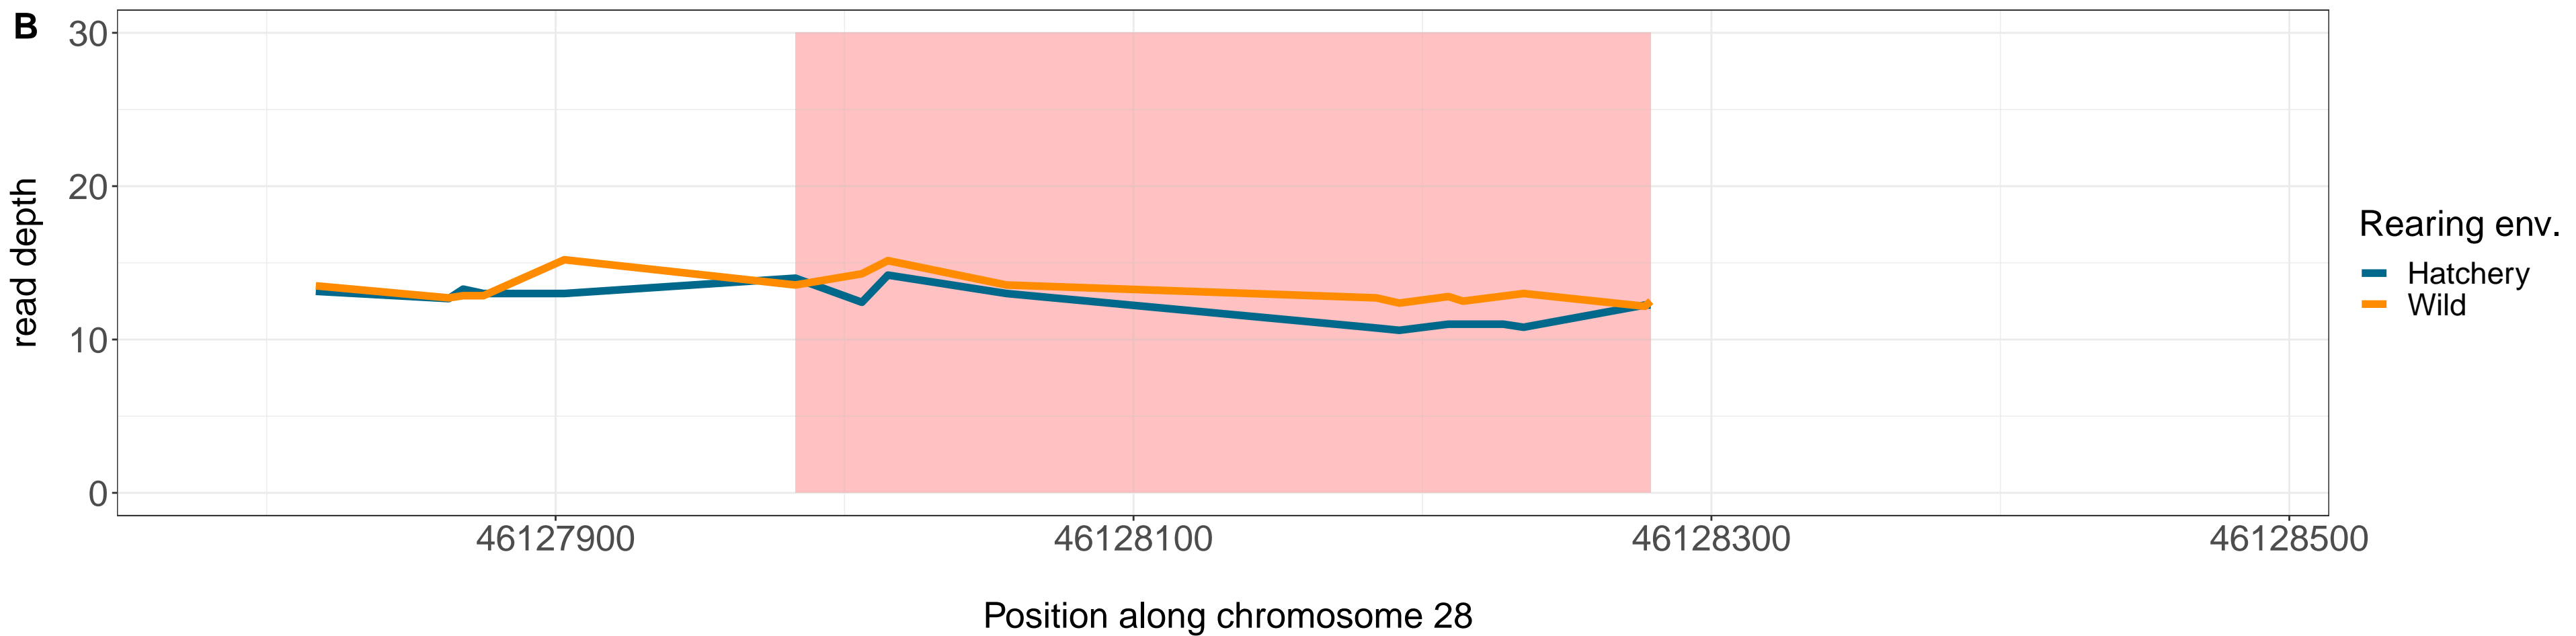

**A**

## DMR\_98

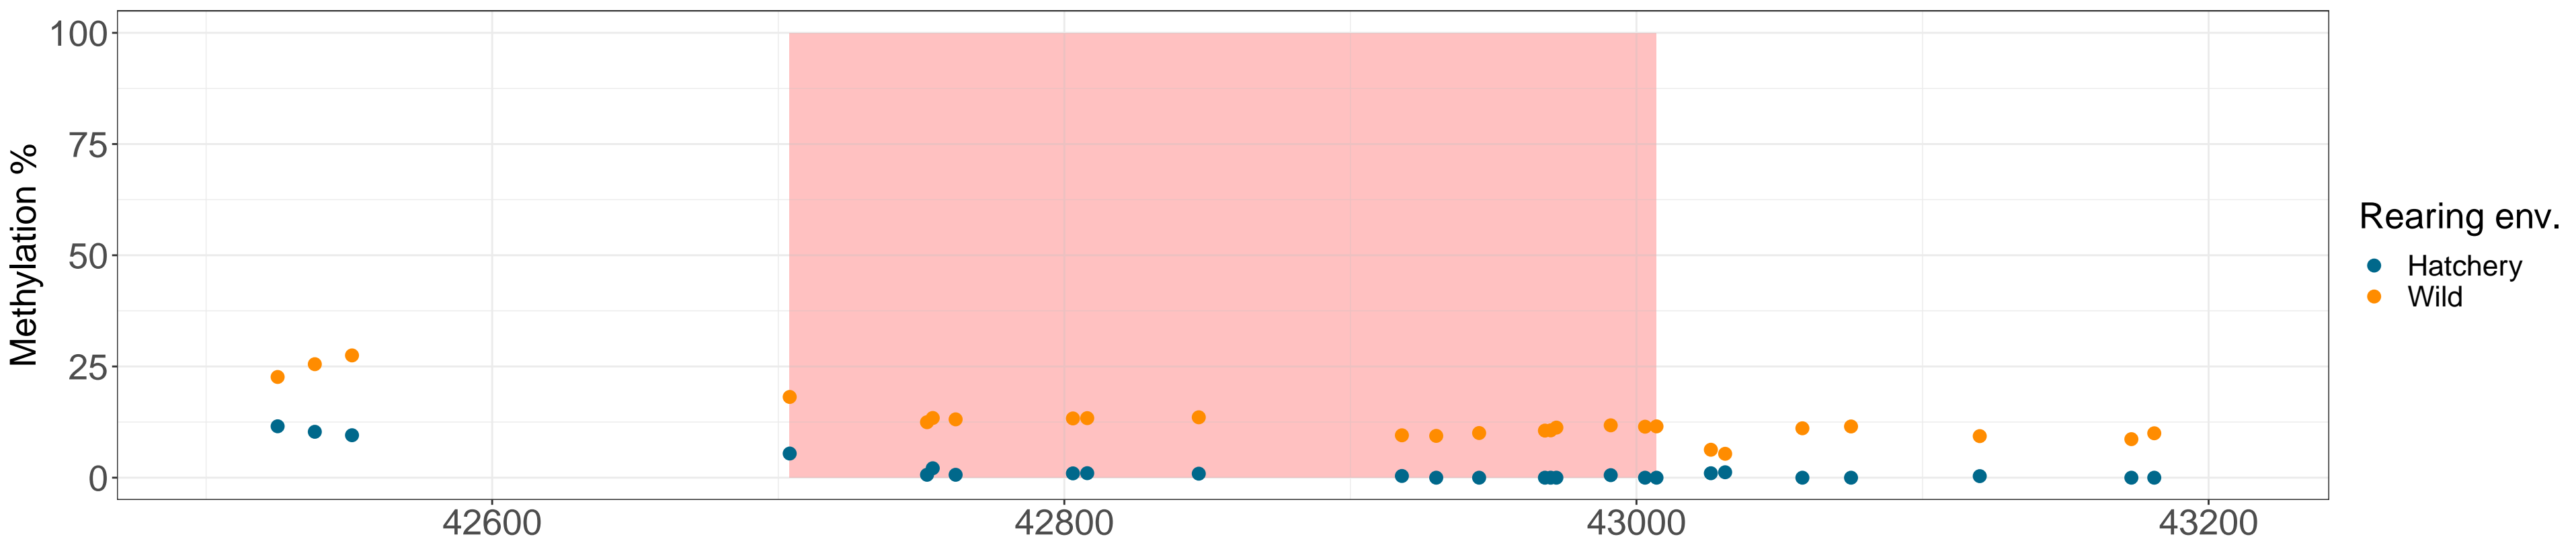**B**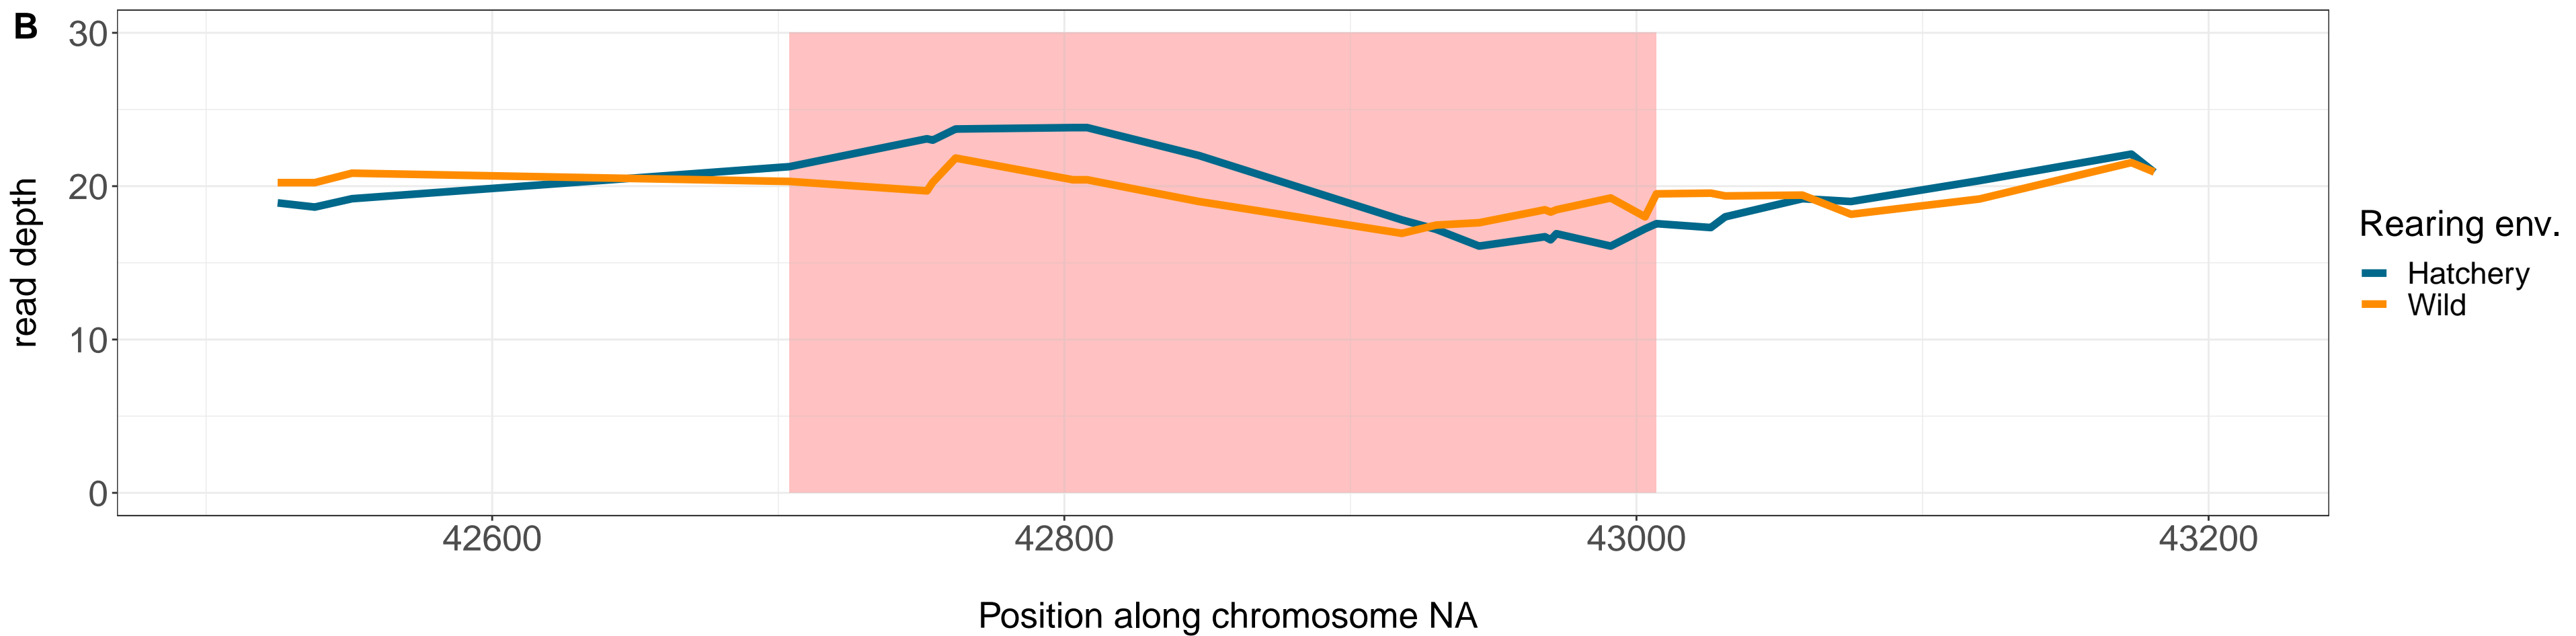

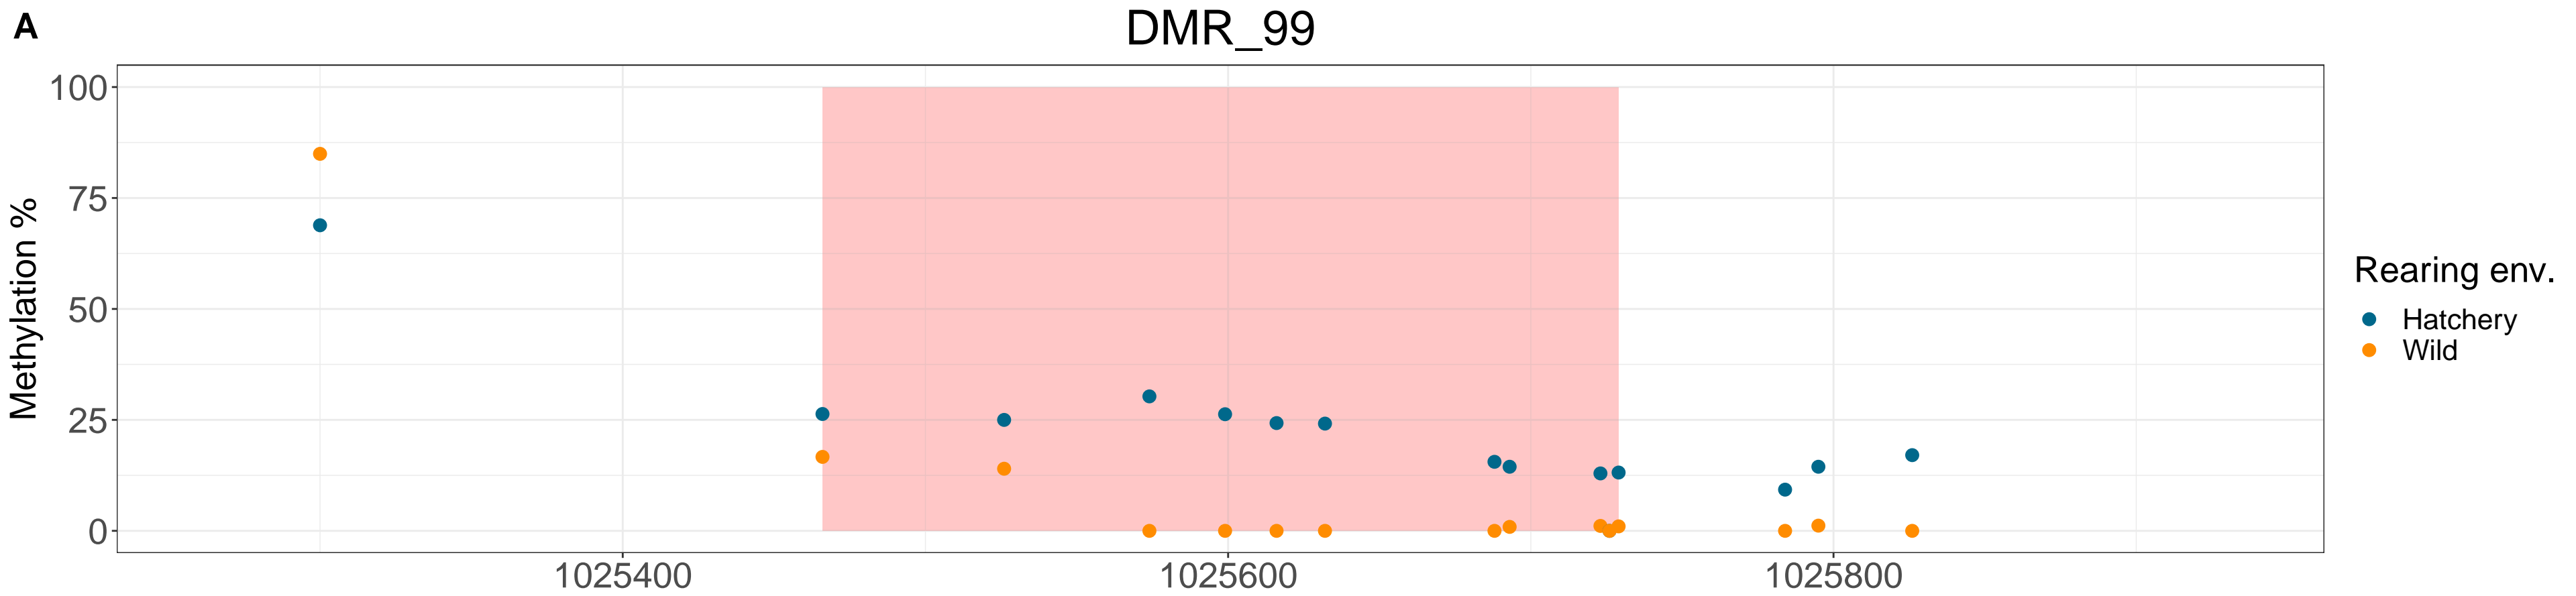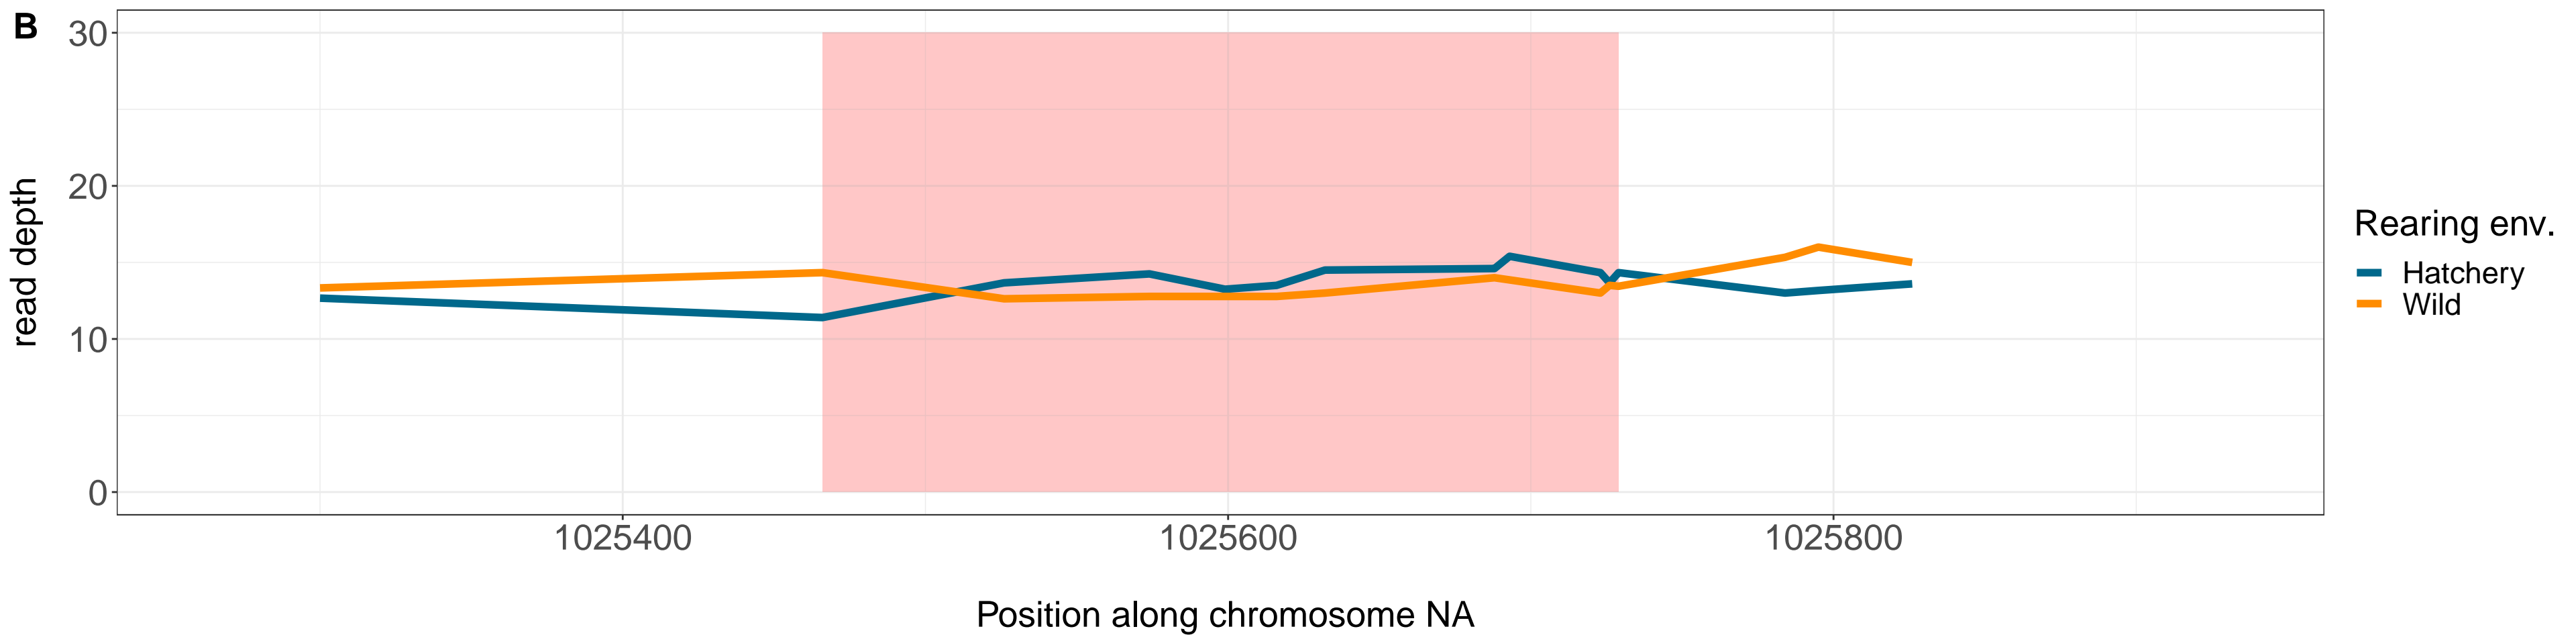

**A**

## DMR\_100

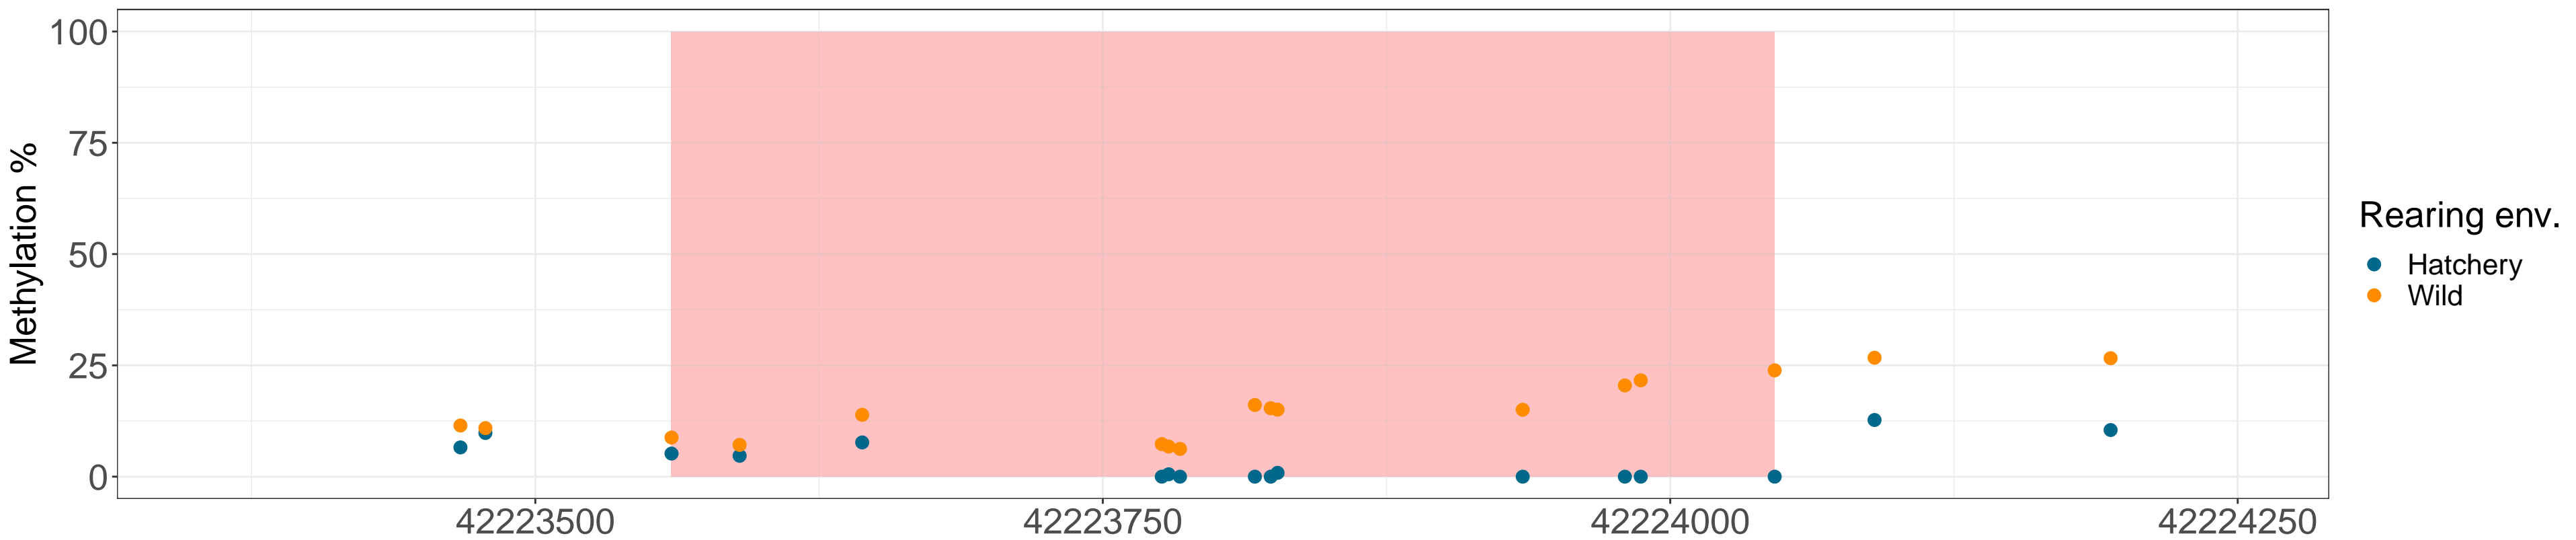**B**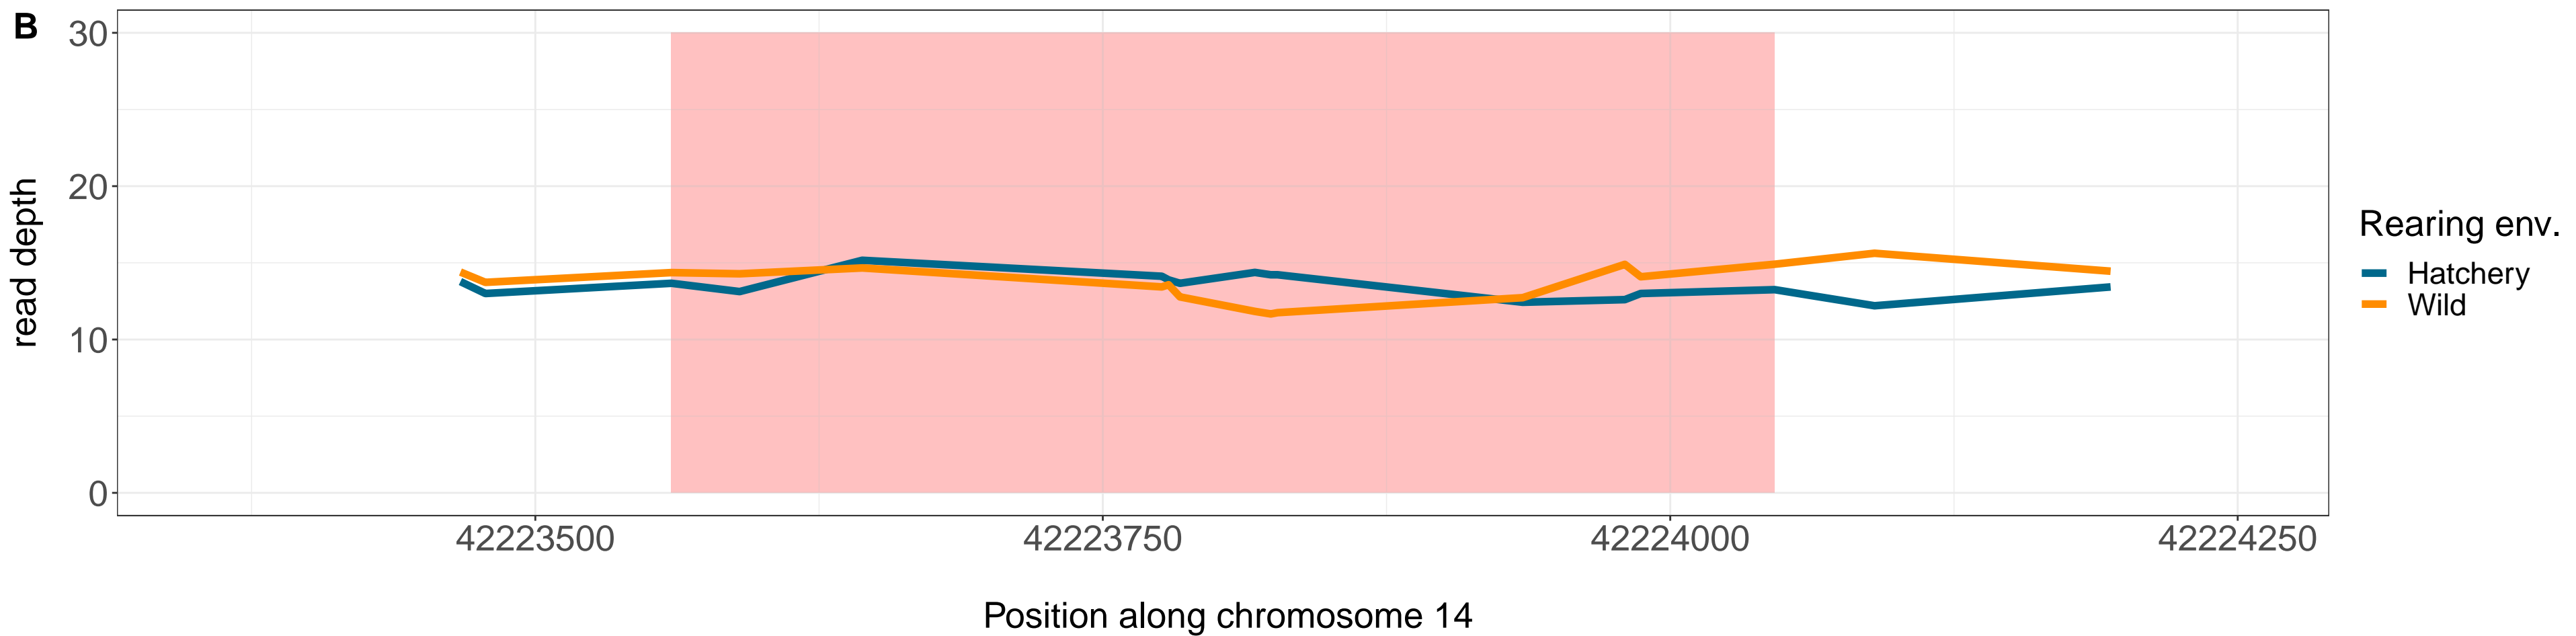



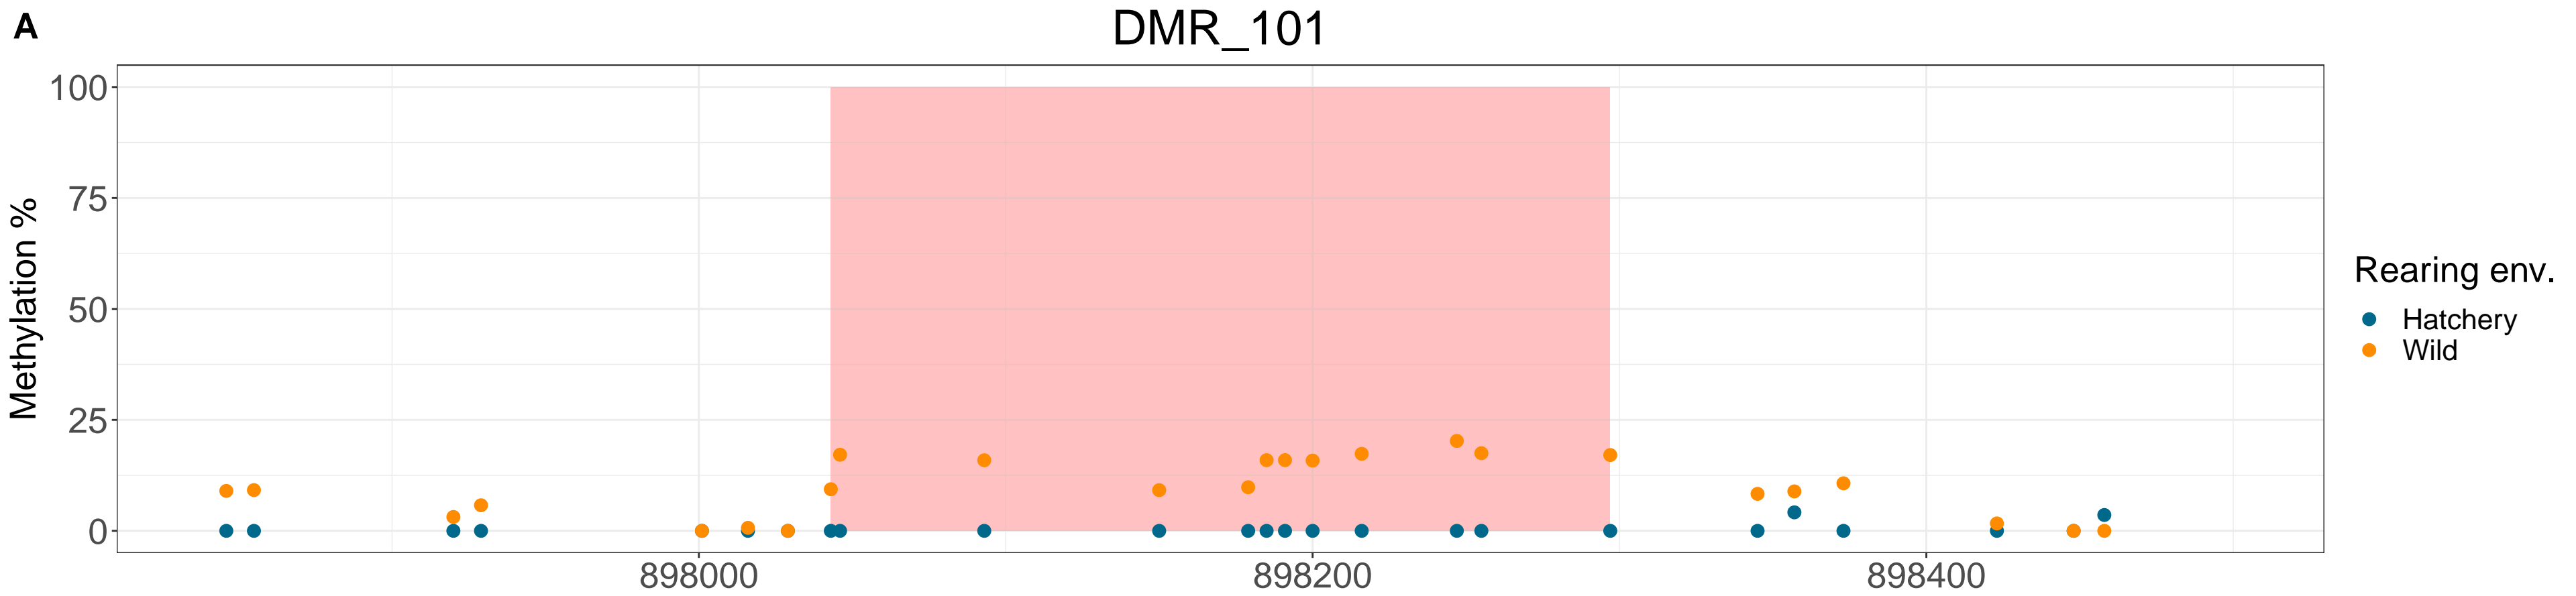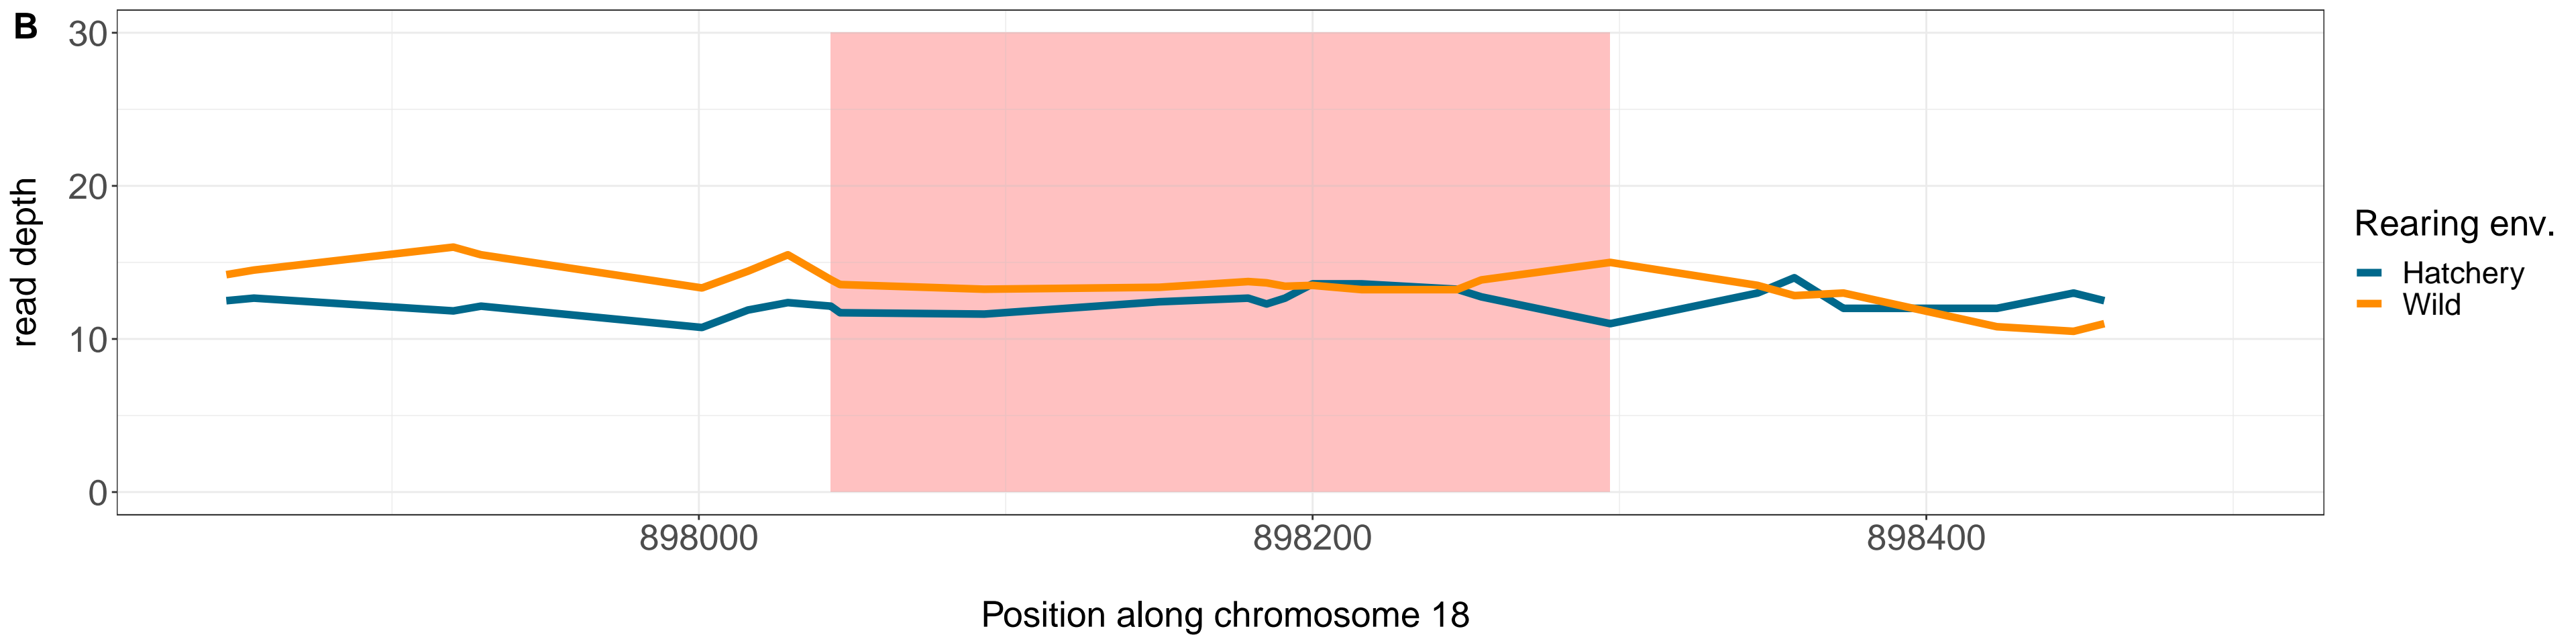

# DMR\_102

XM\_020468255.1

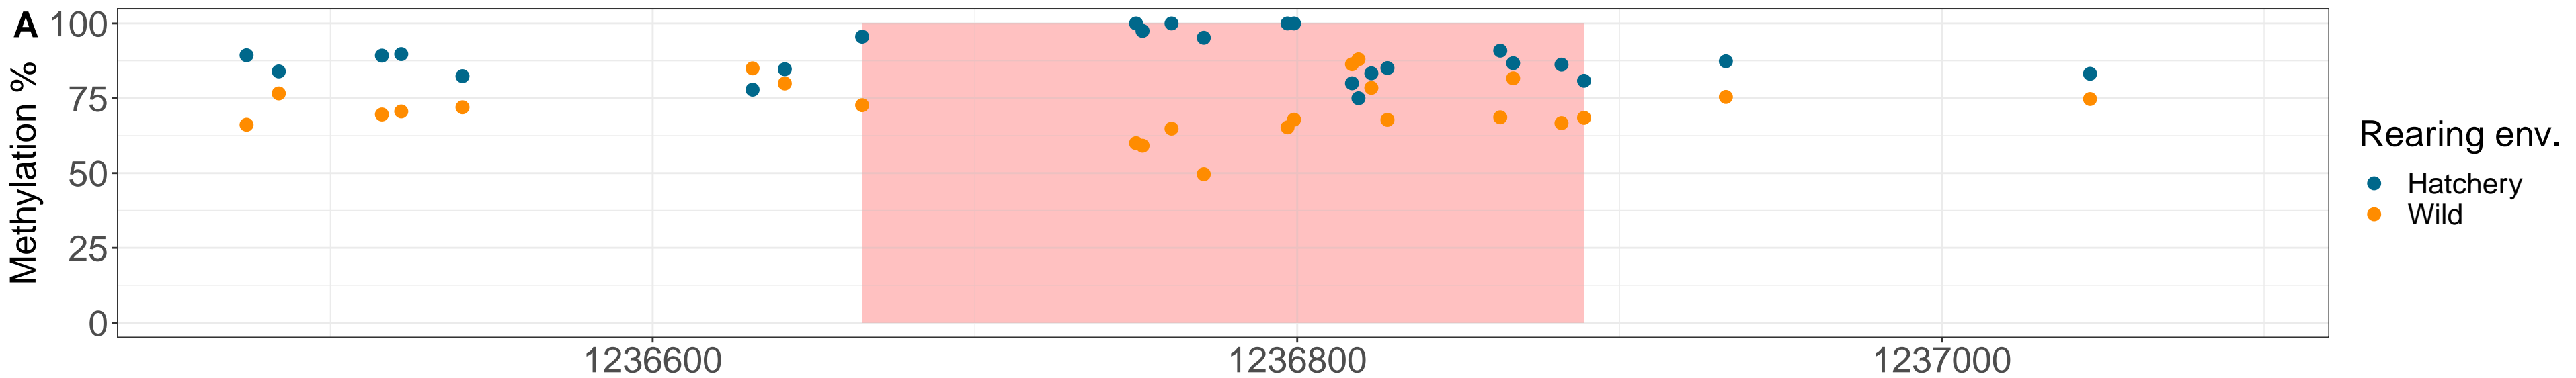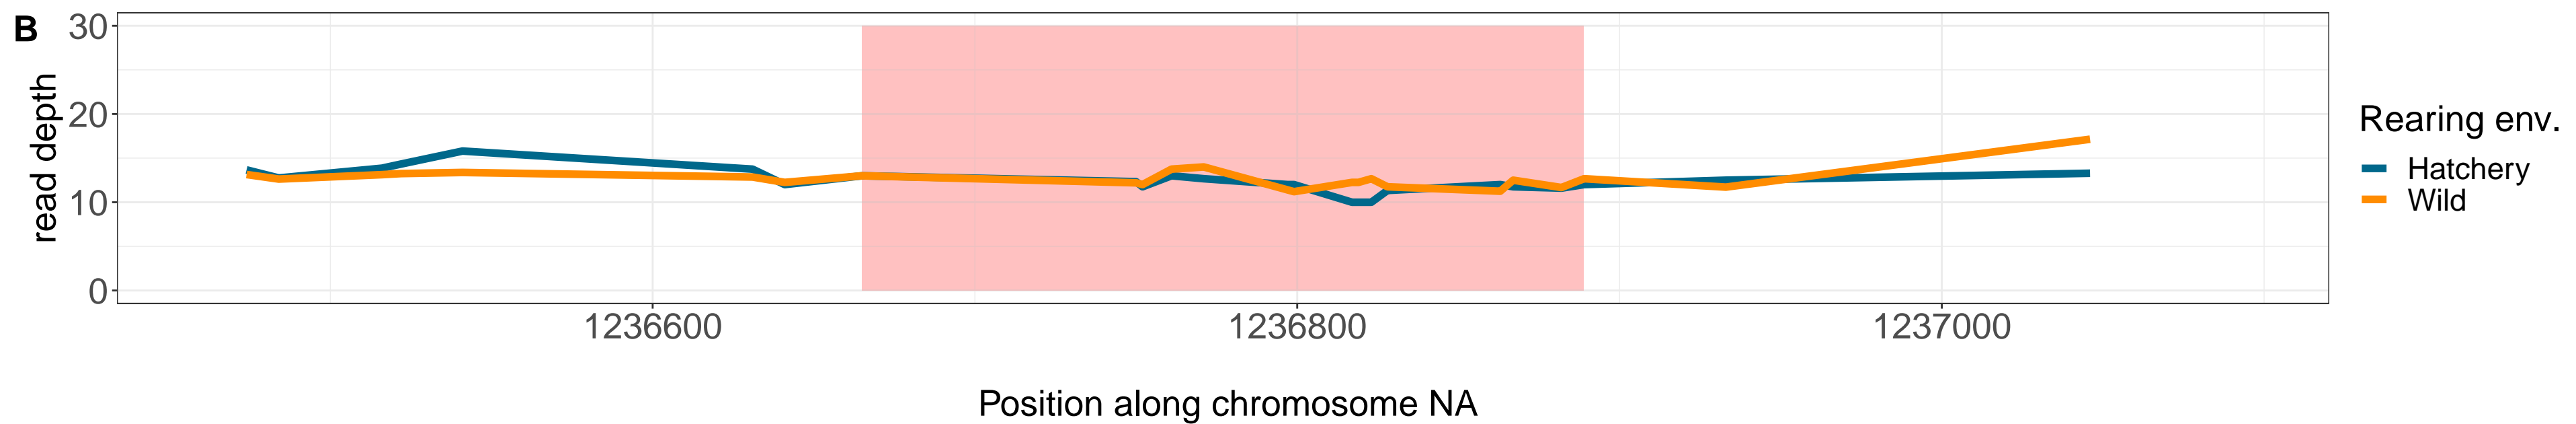

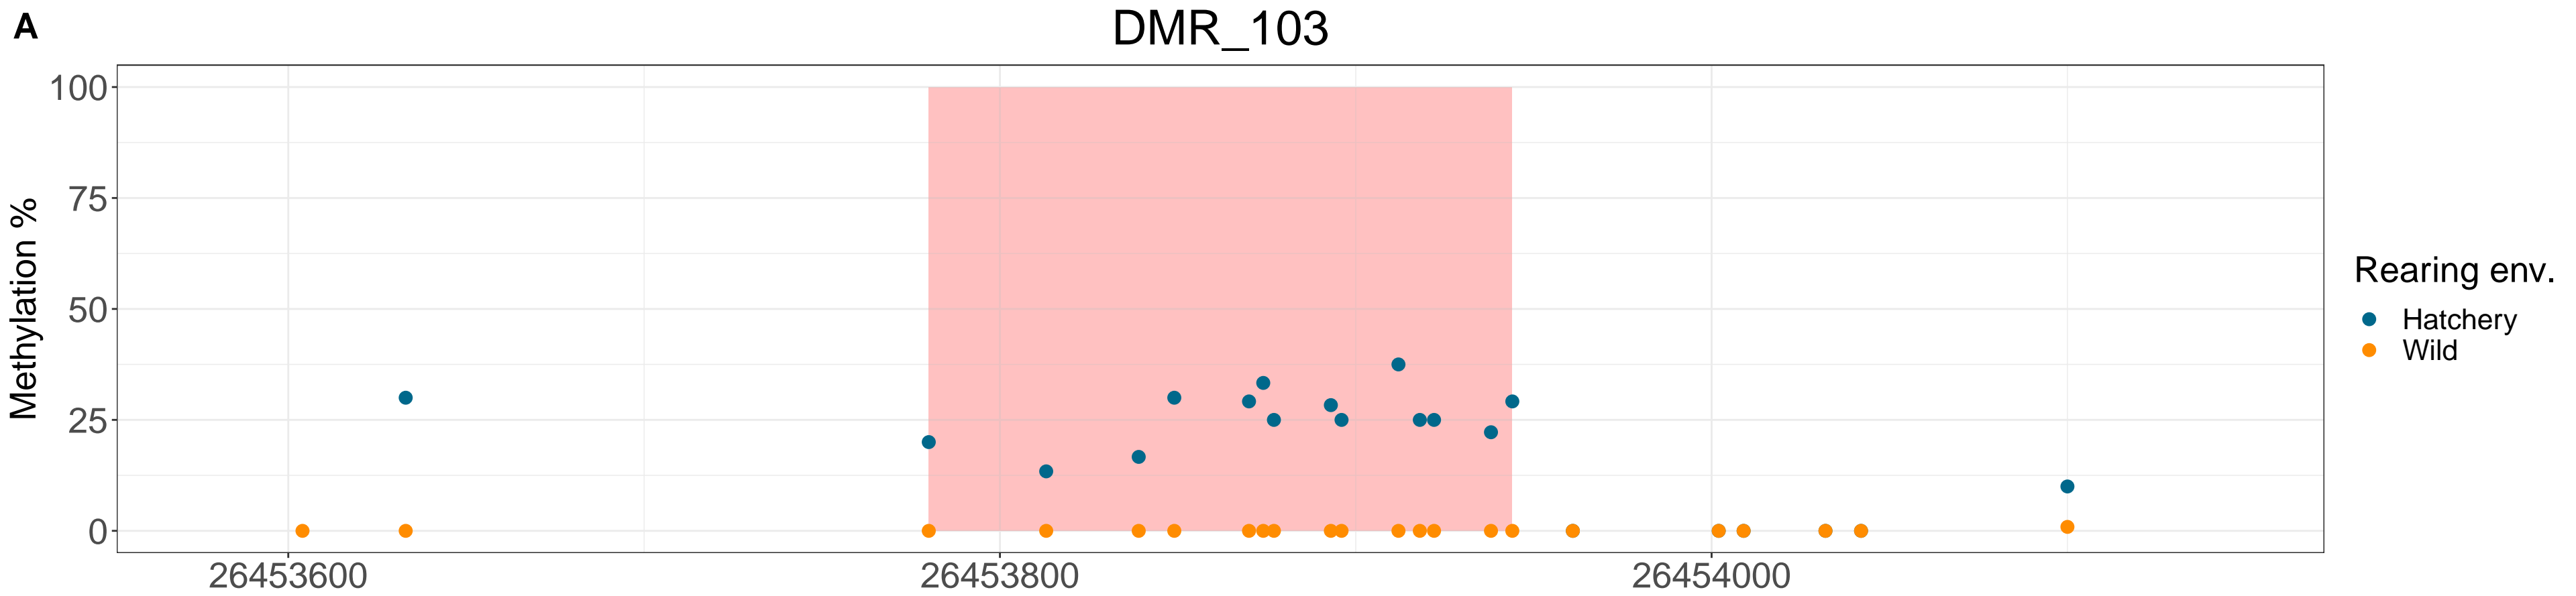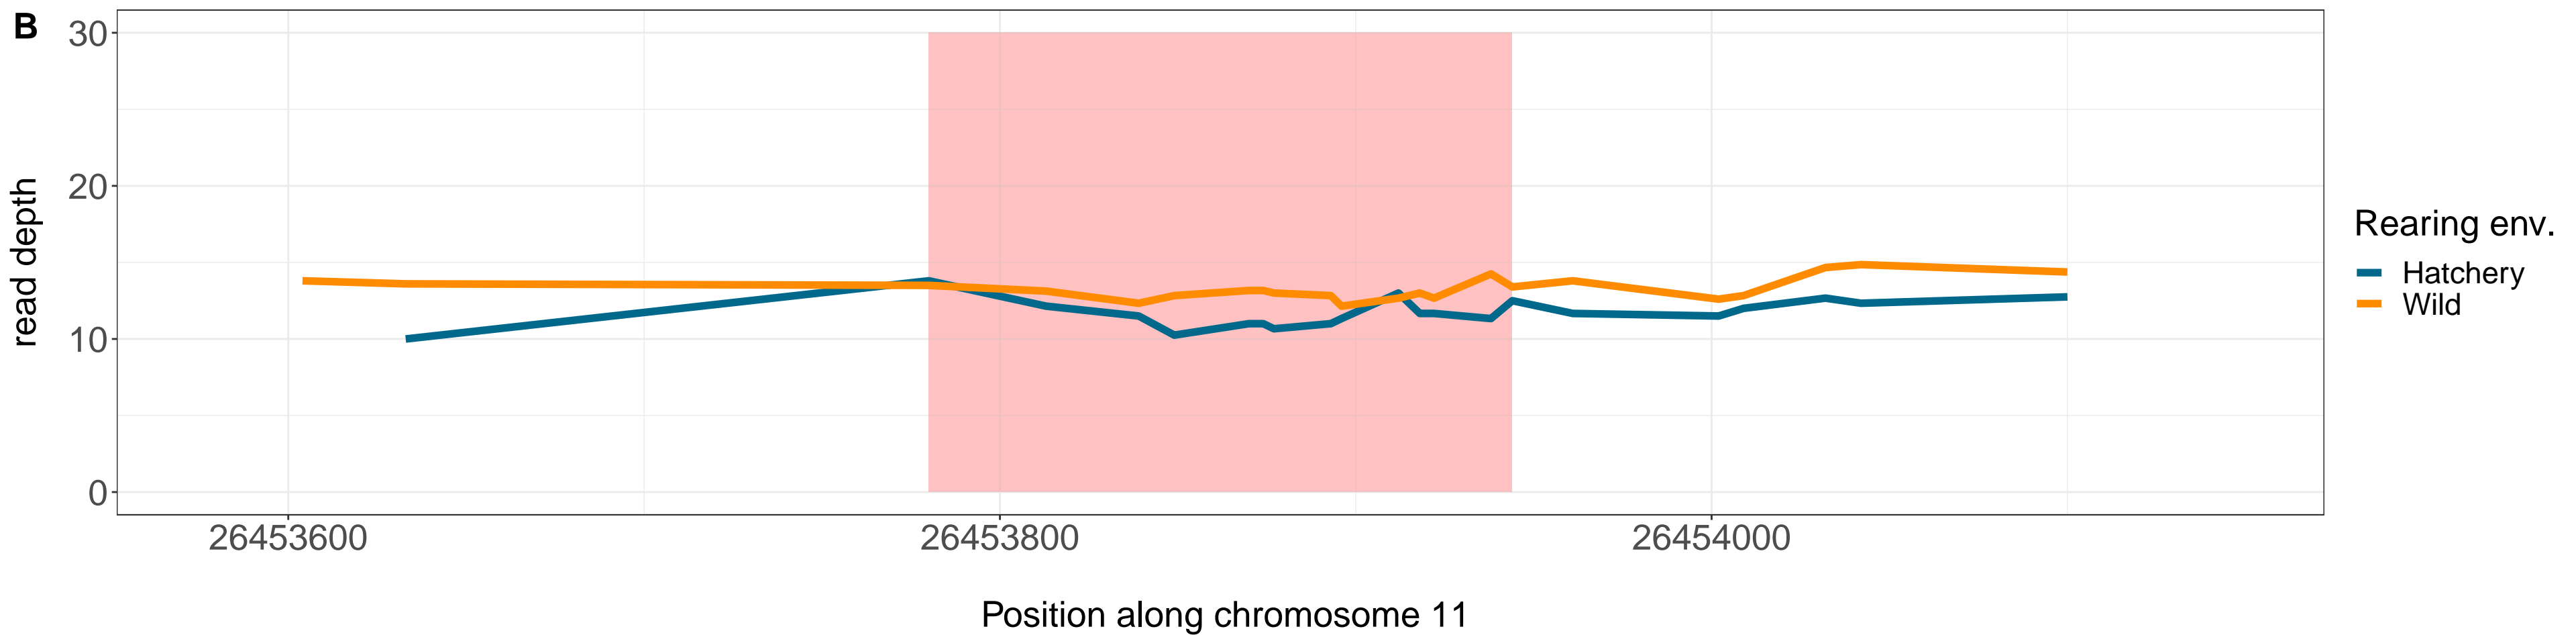

**A**

## DMR\_104

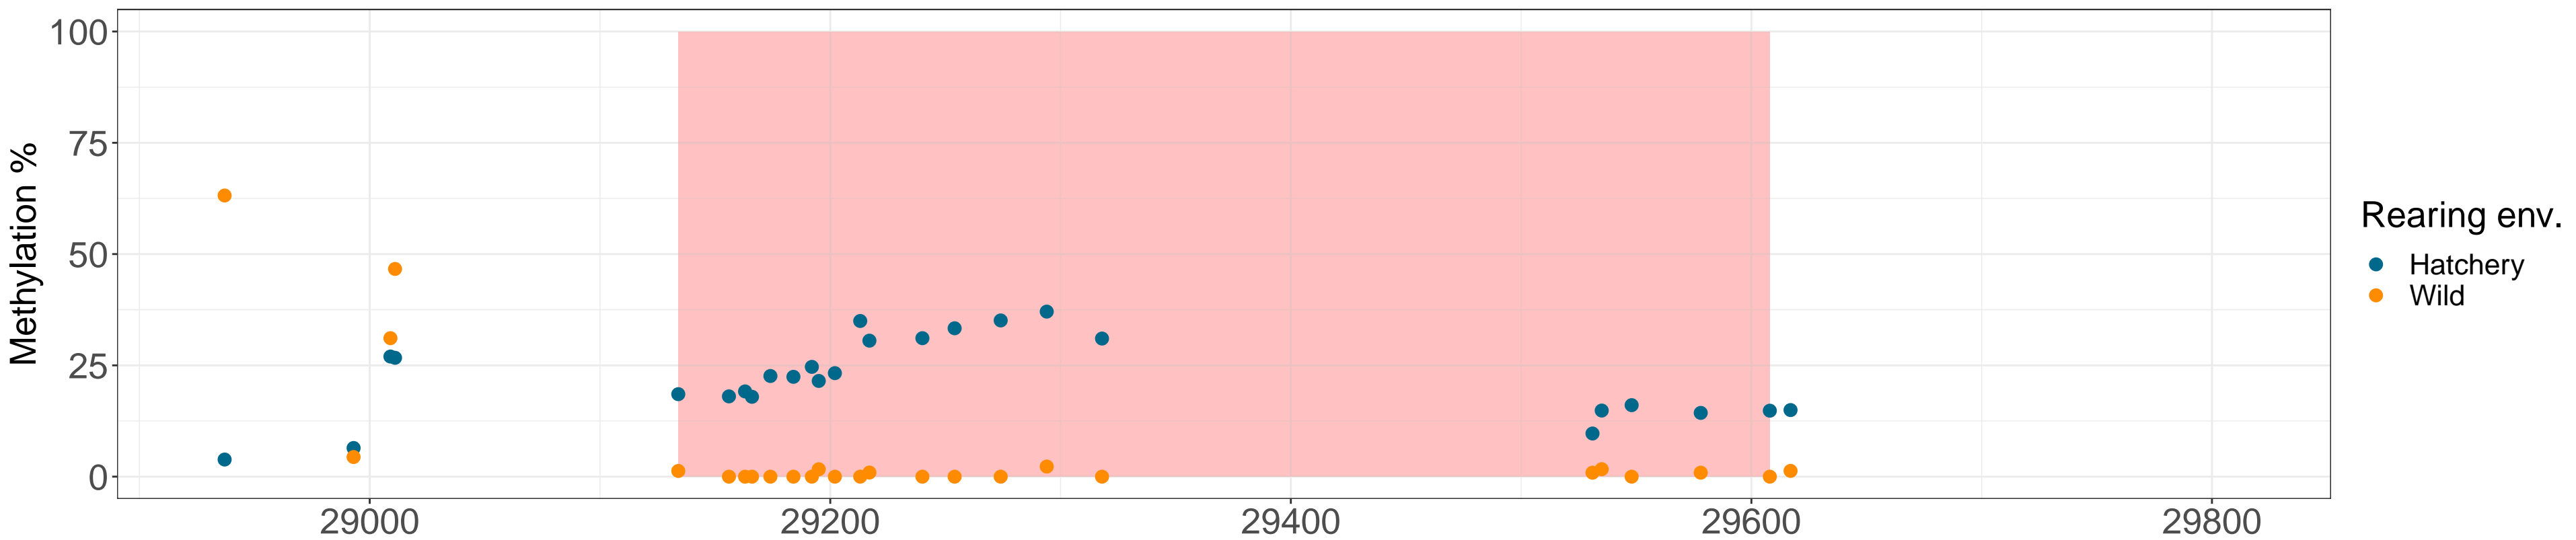**B**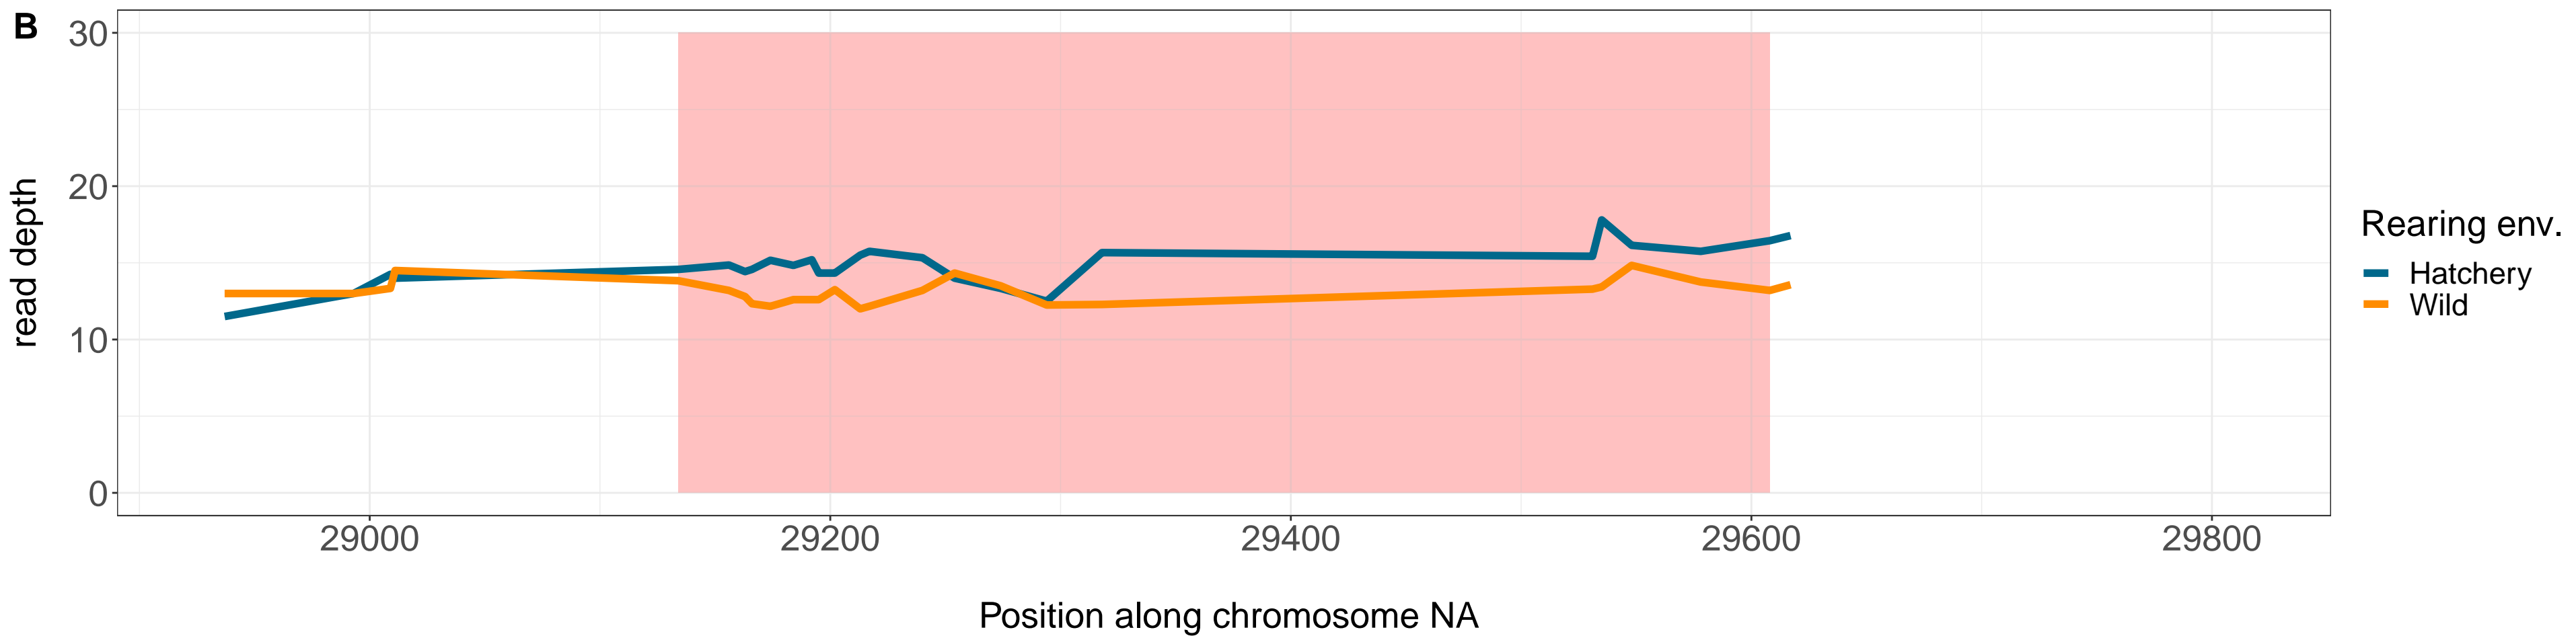

**A**

## DMR\_105

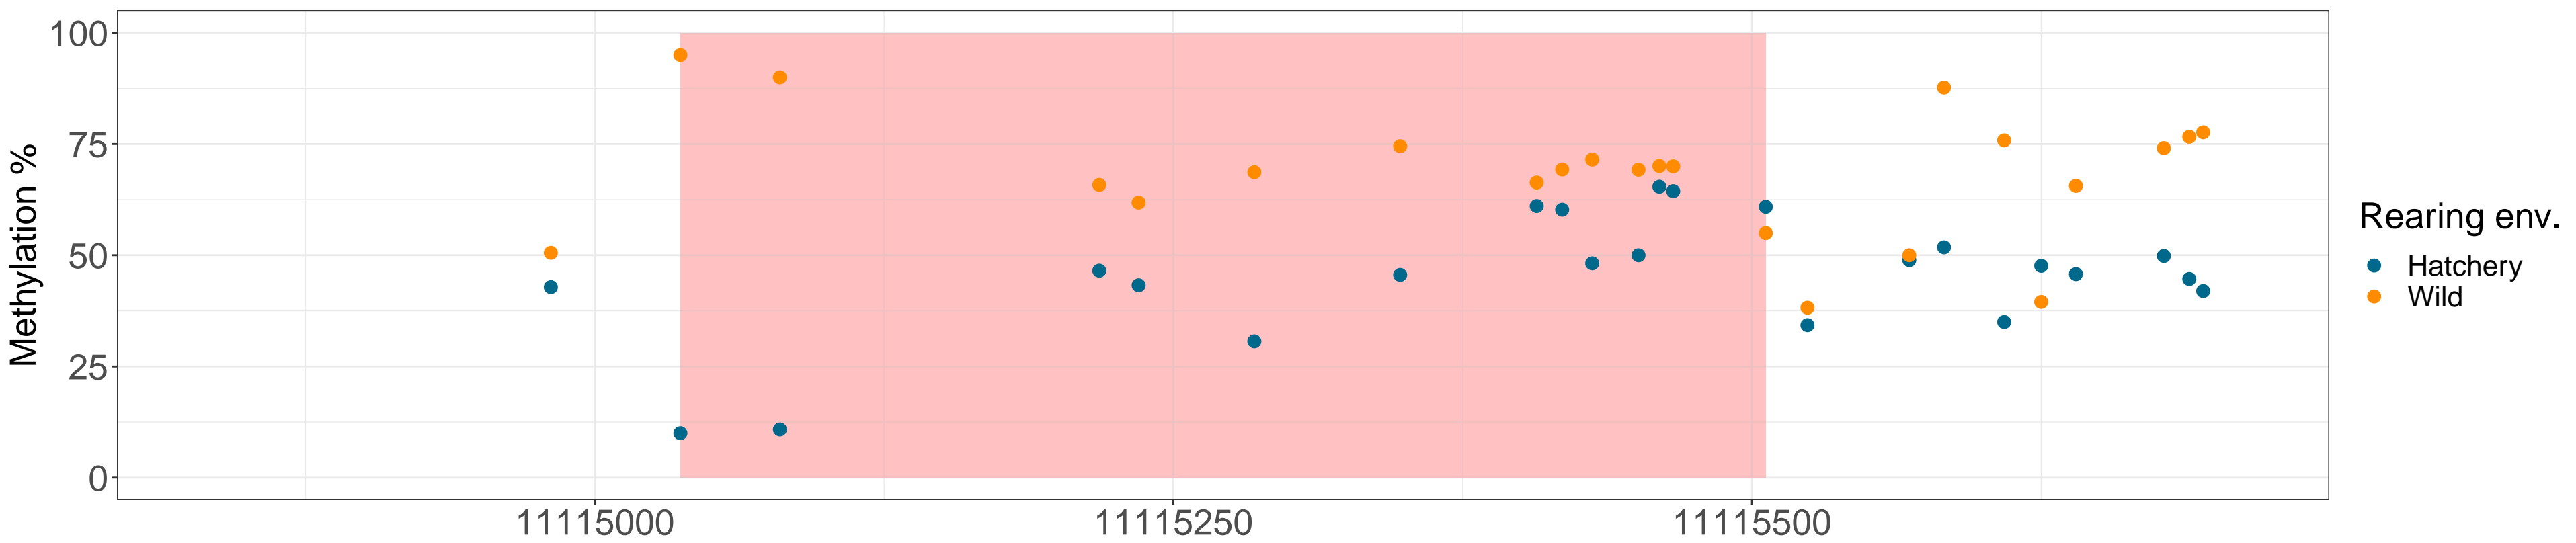**B**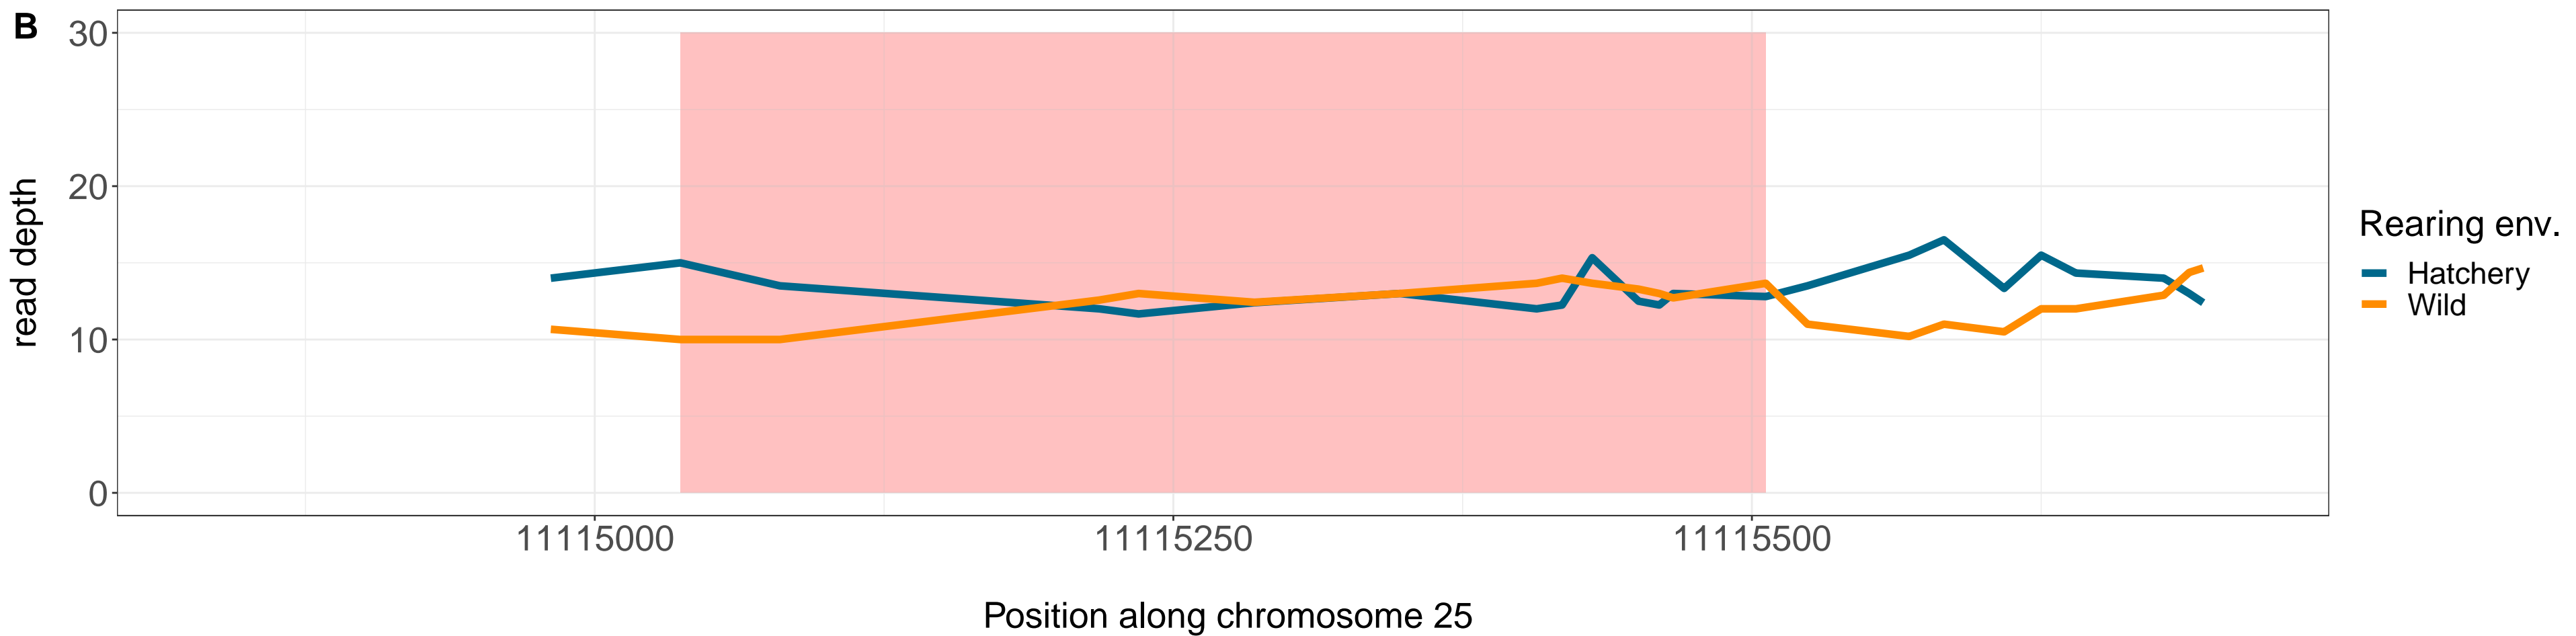

**A**

## DMR\_106

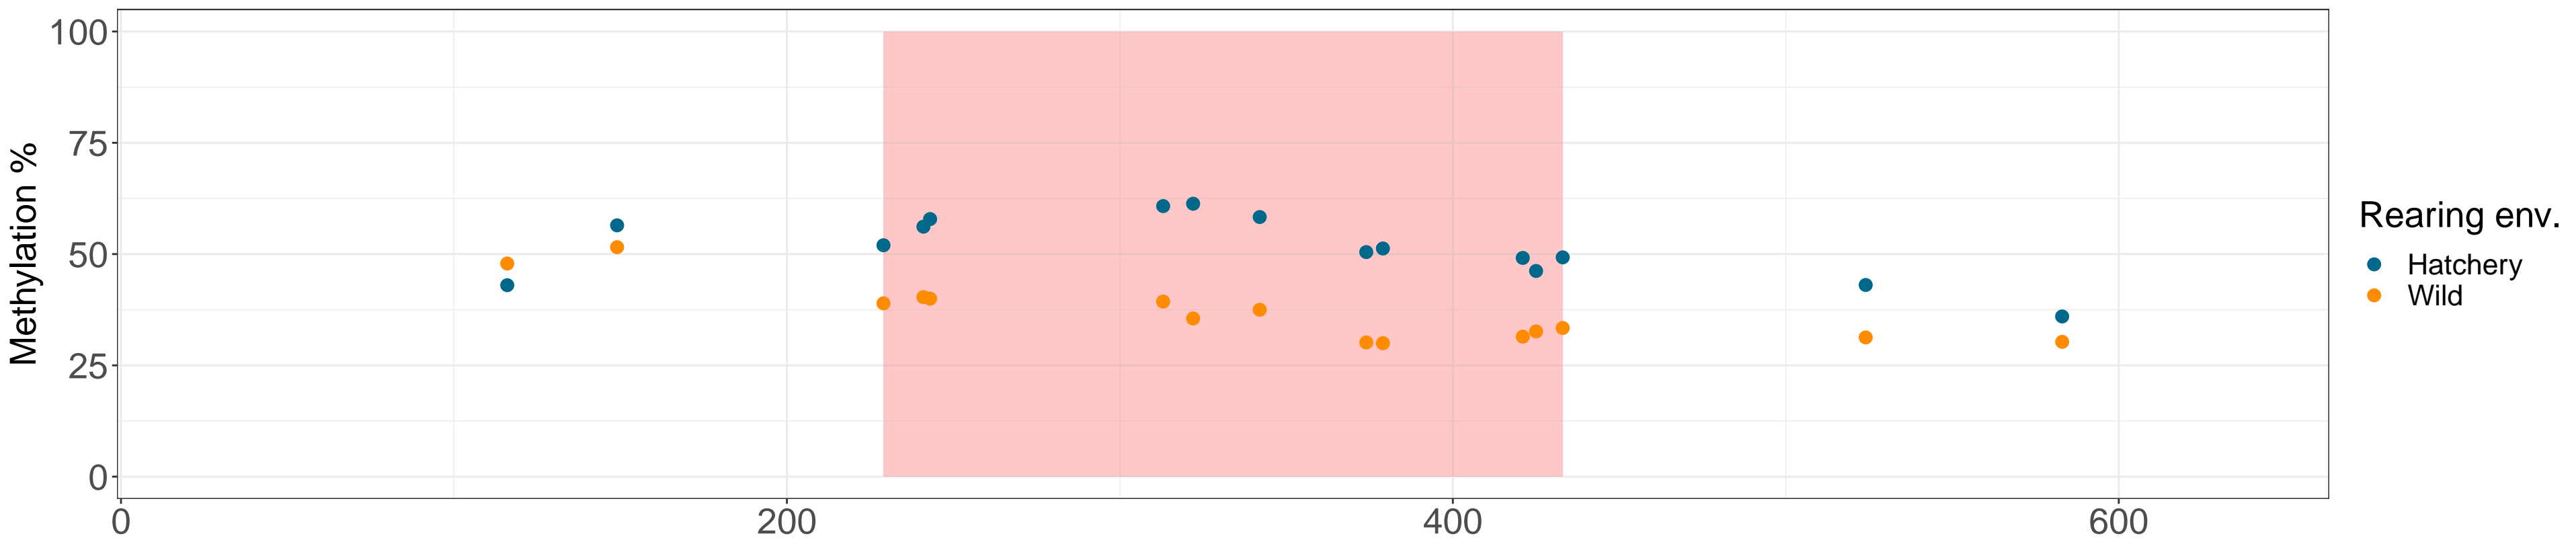**B**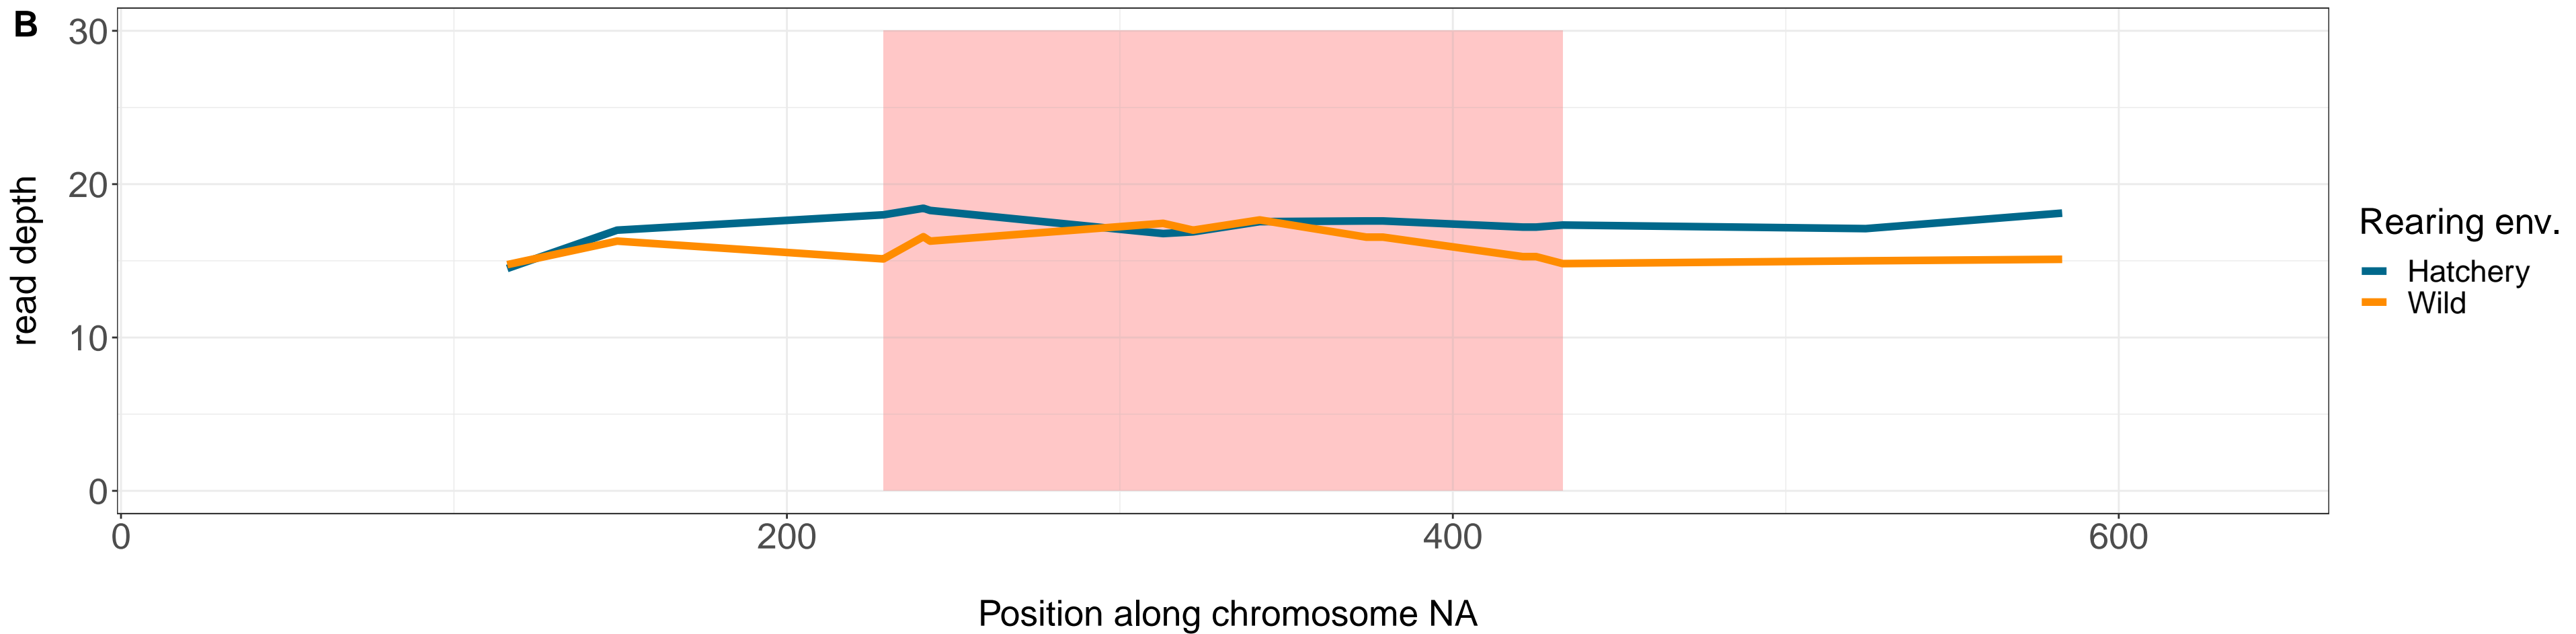

**A**

## DMR\_107

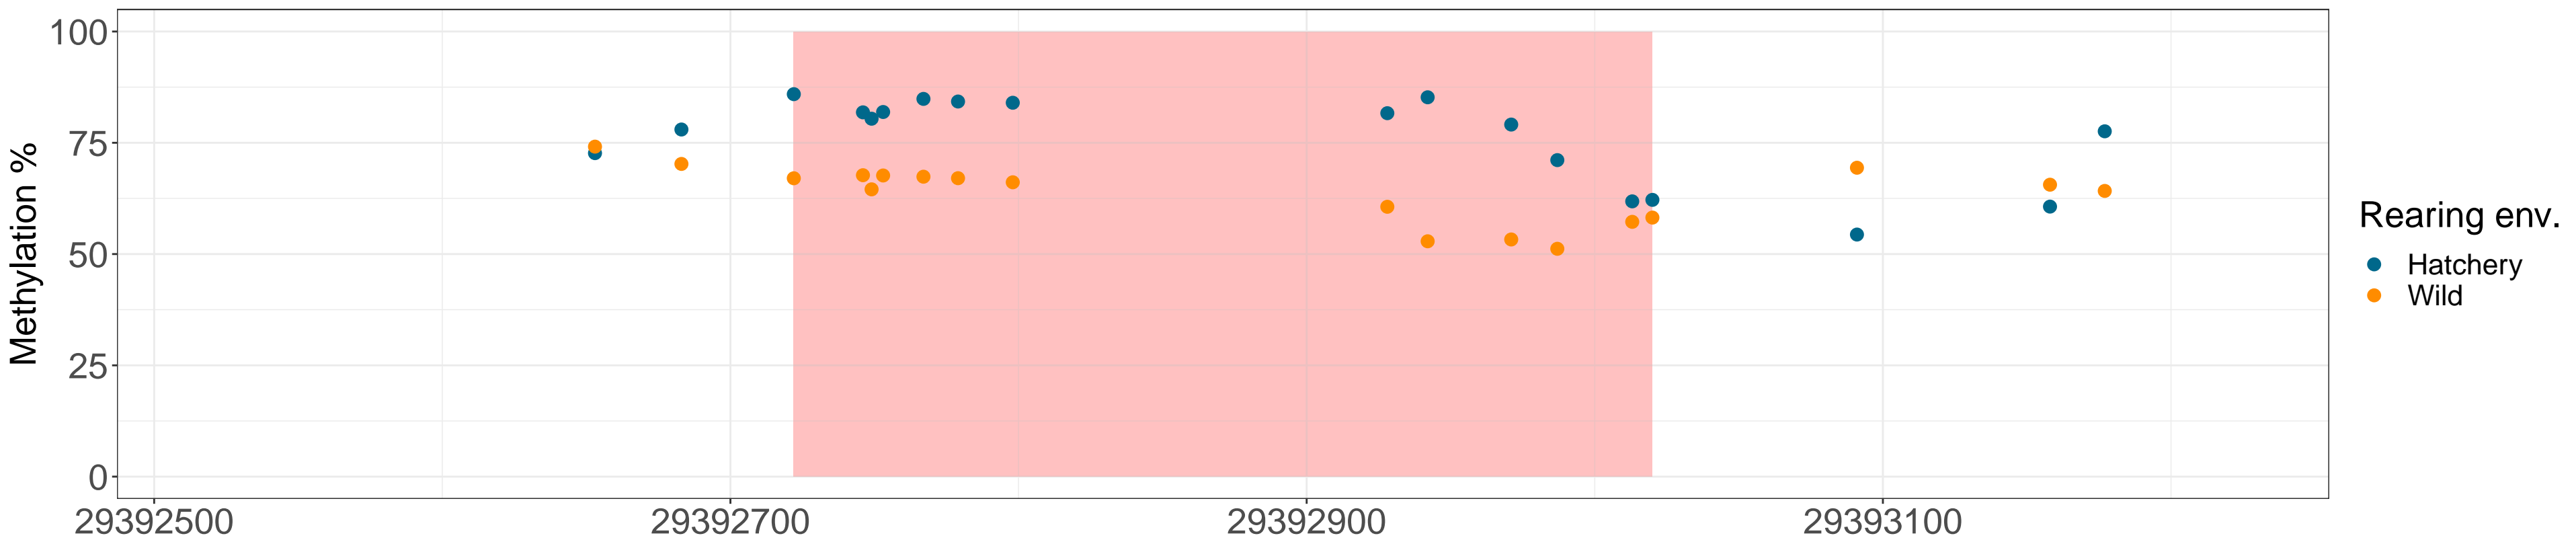**B**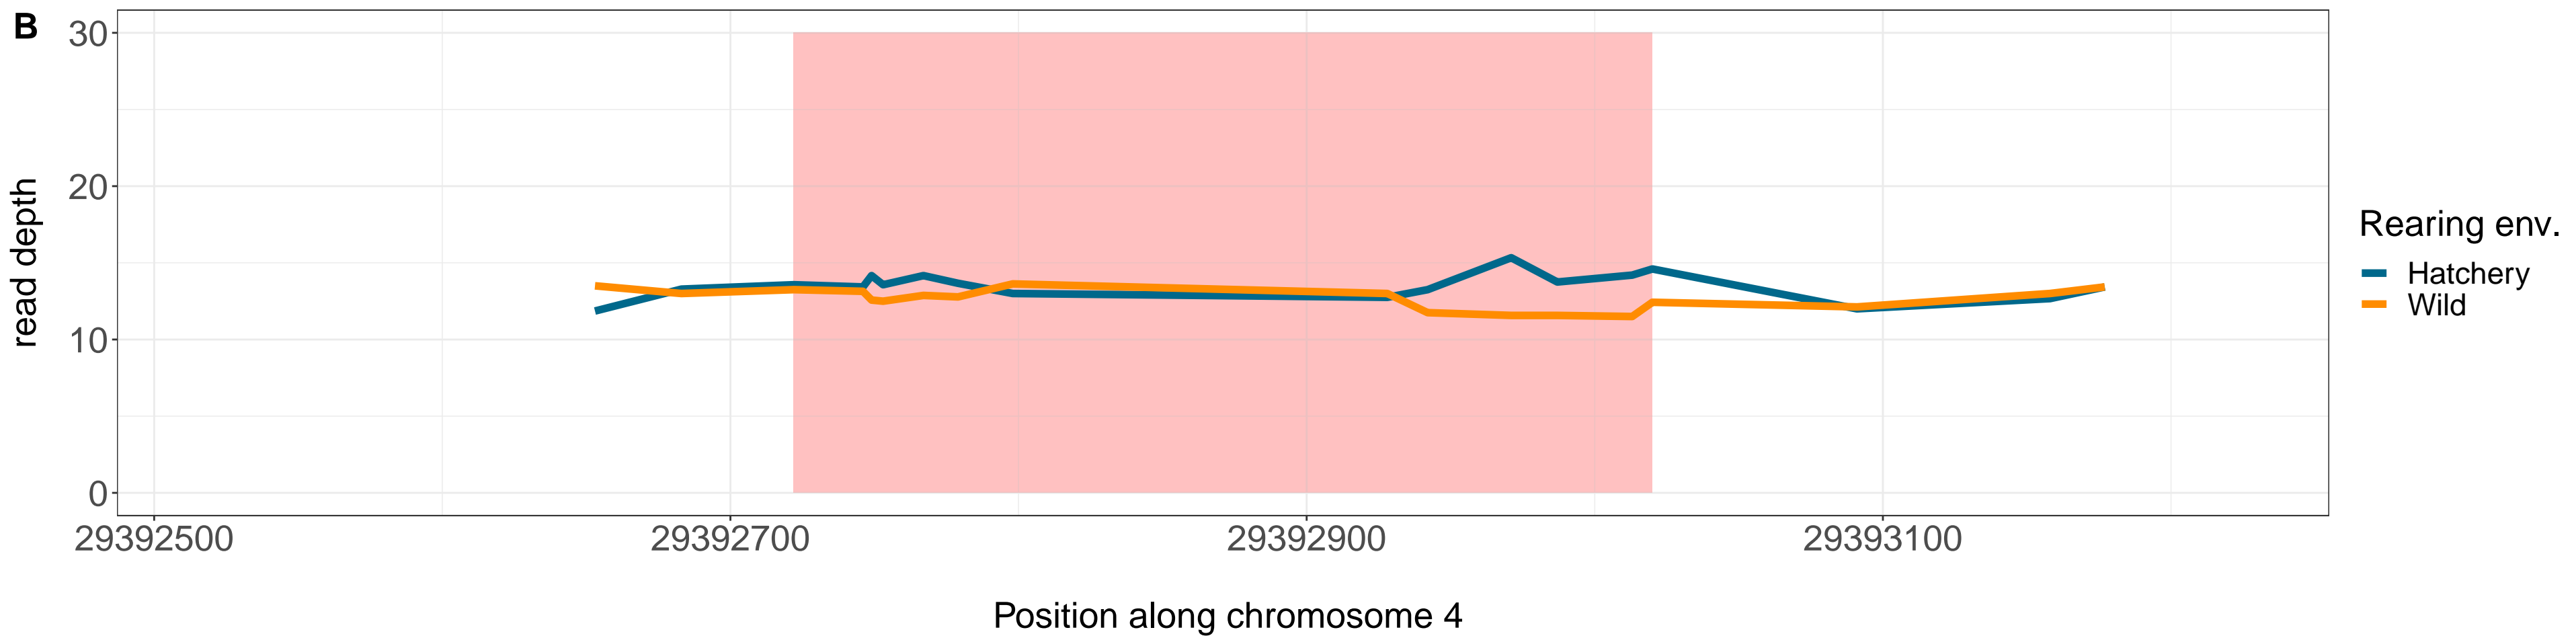

**A**

## DMR\_109

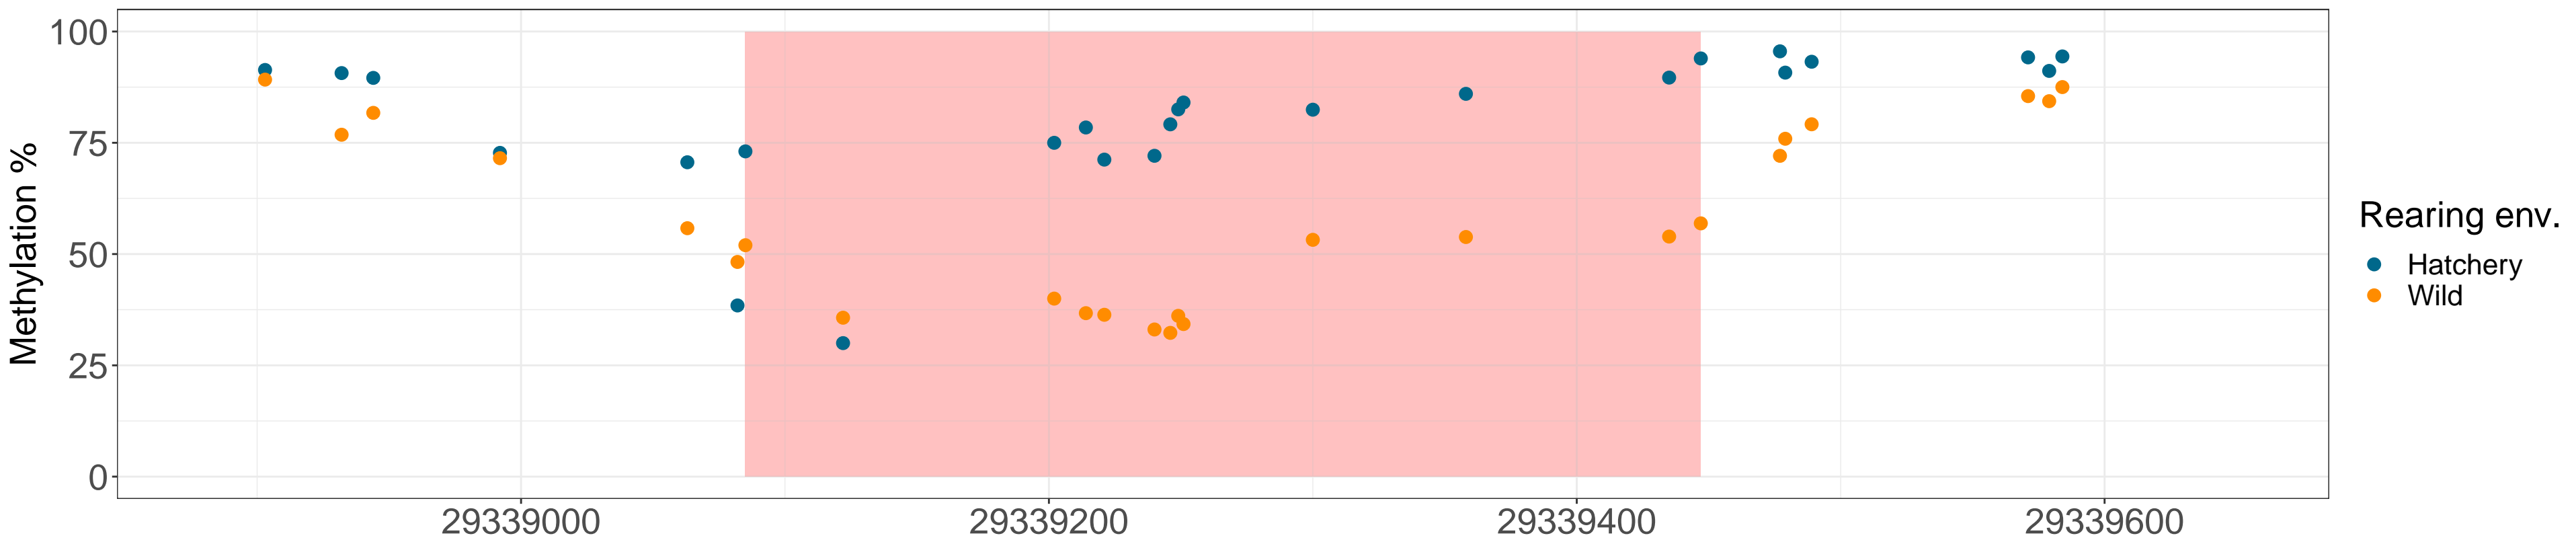**B**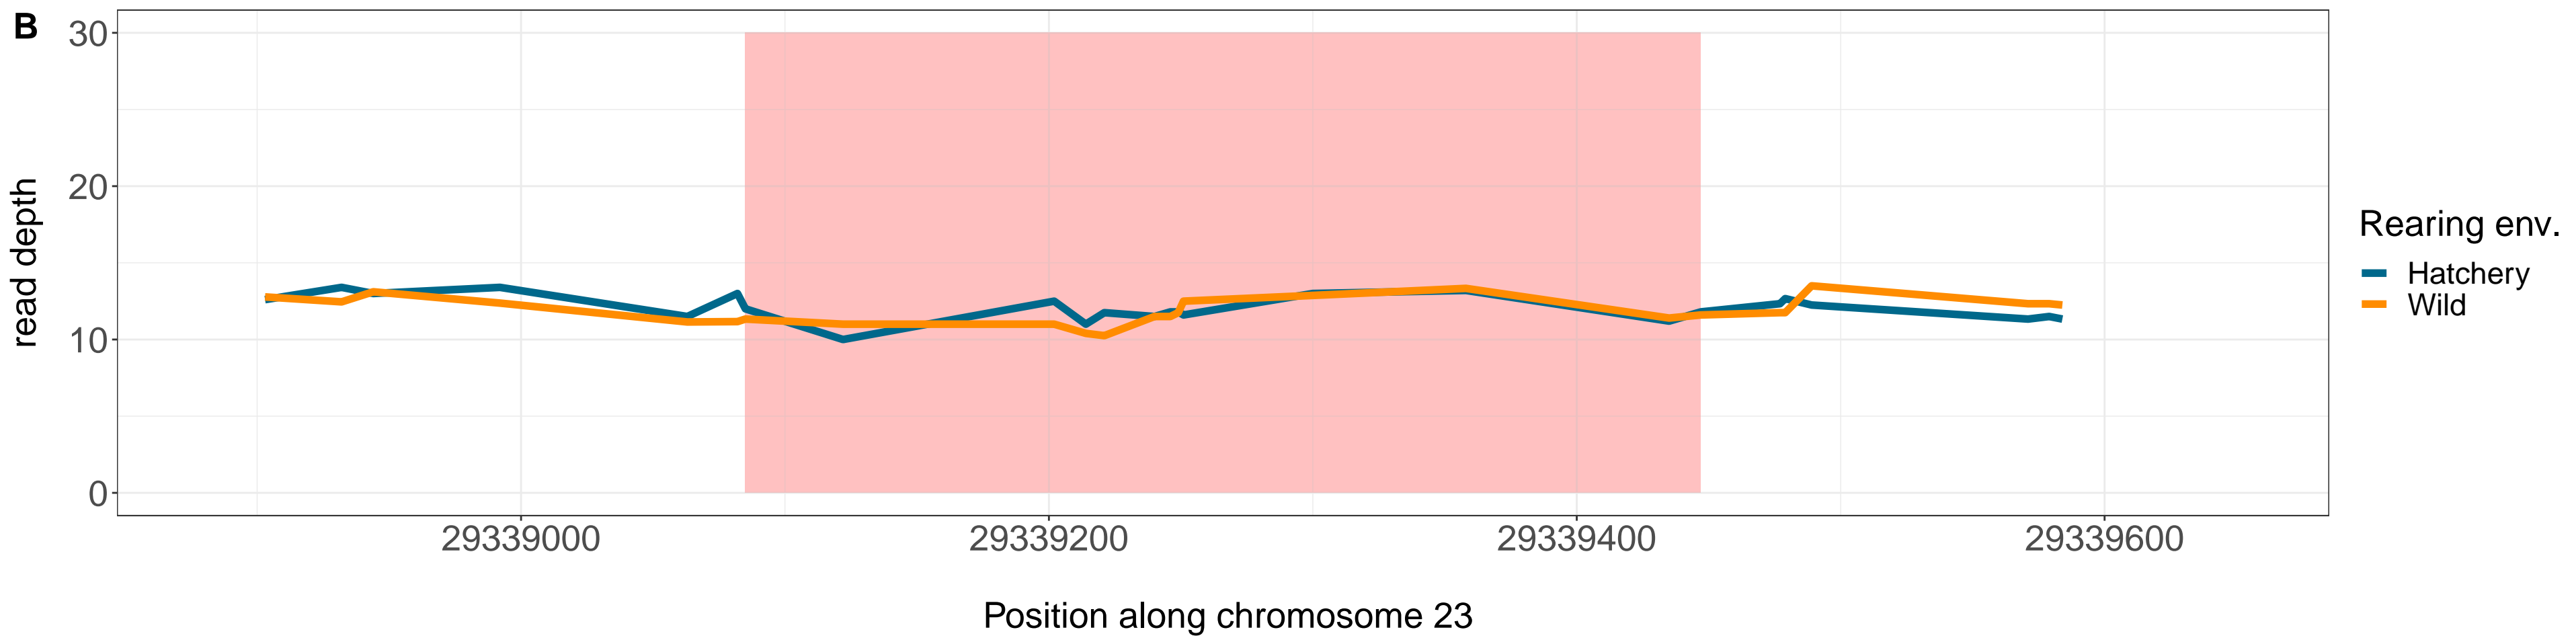



# DMR\_110

XM\_020497732.1

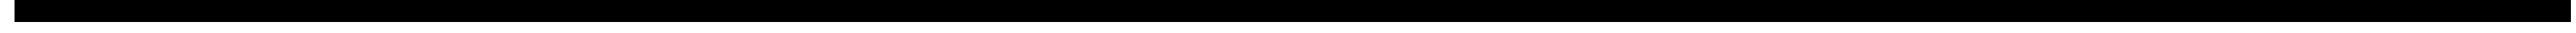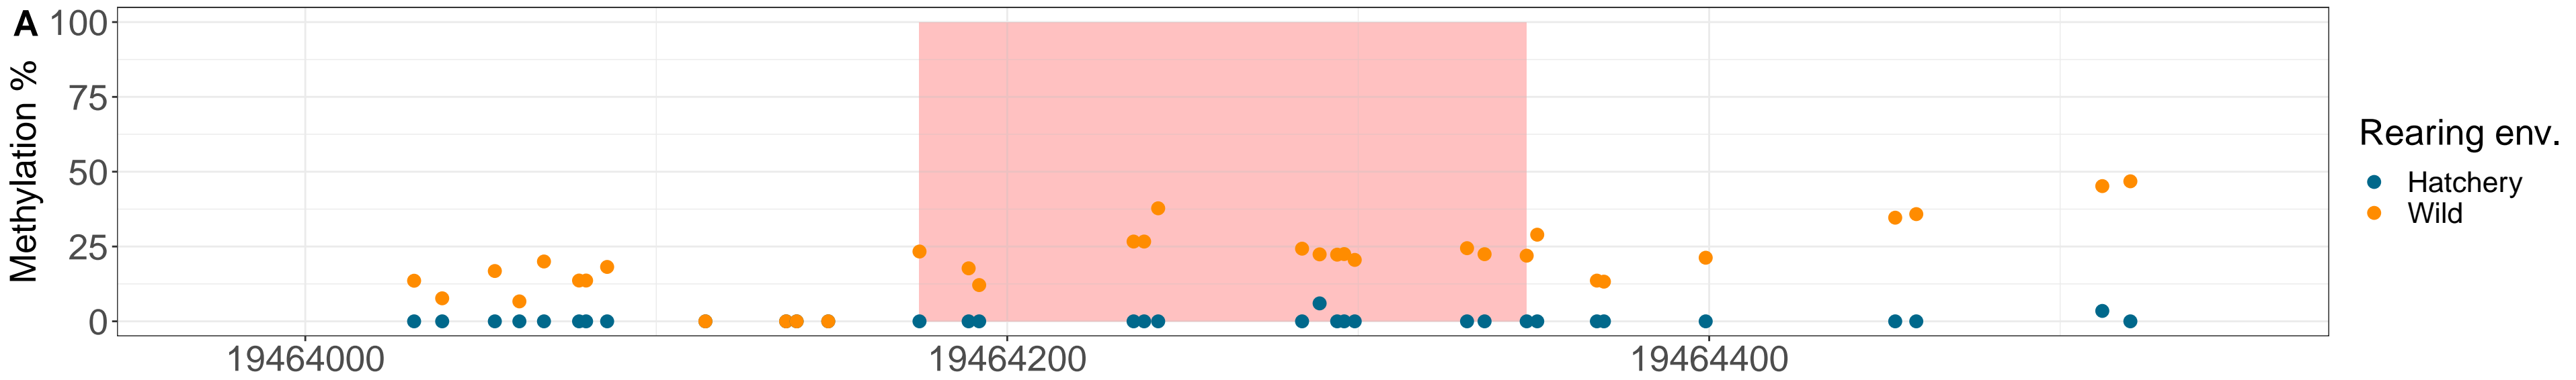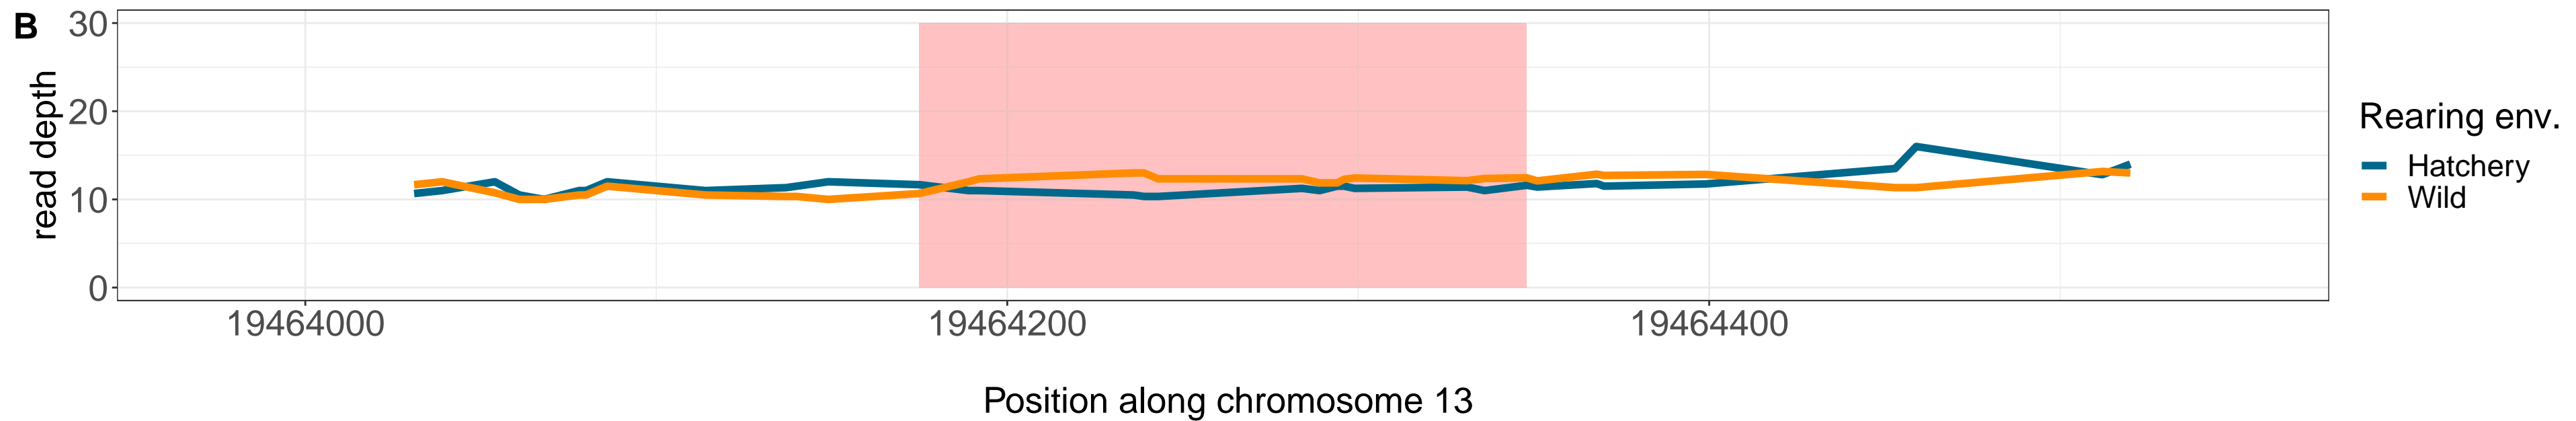

**A**

## DMR\_111

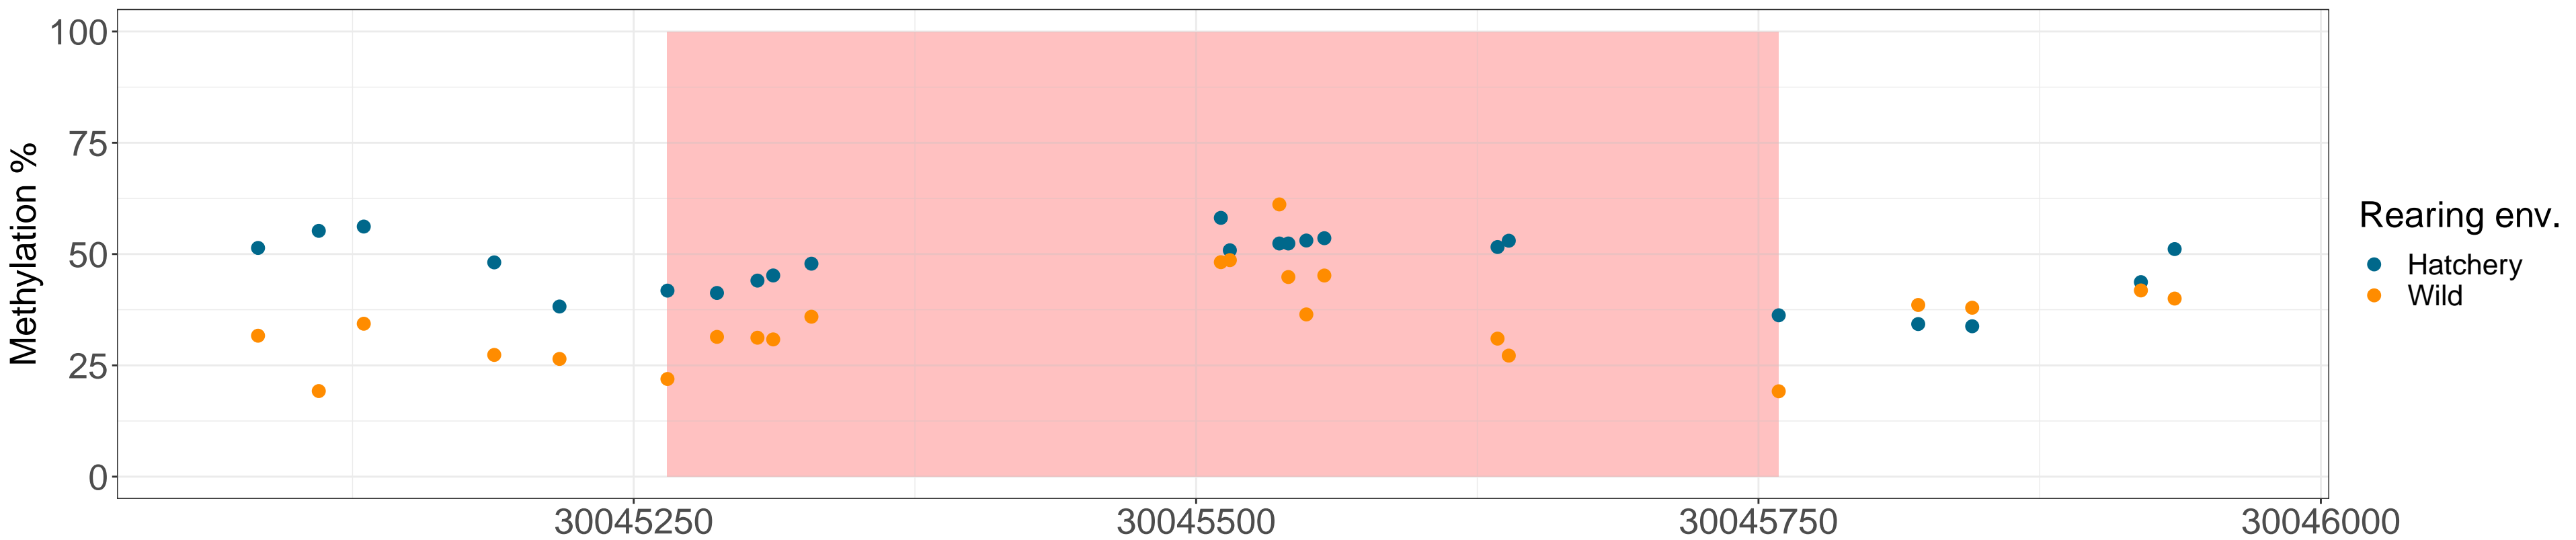**B**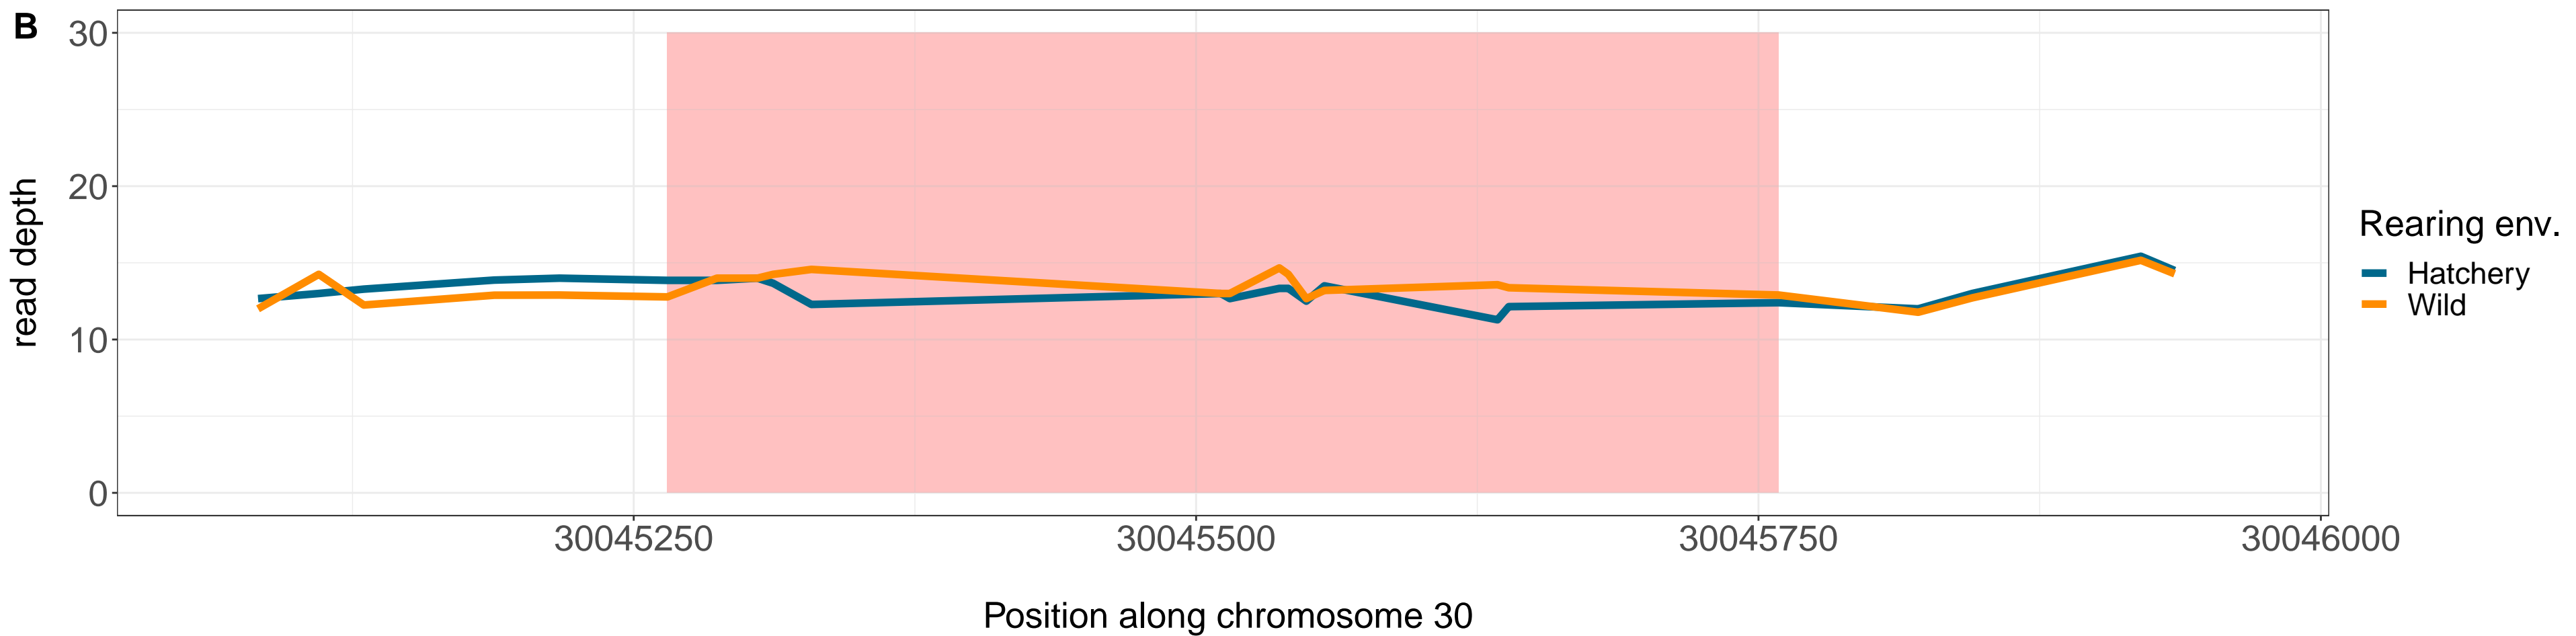

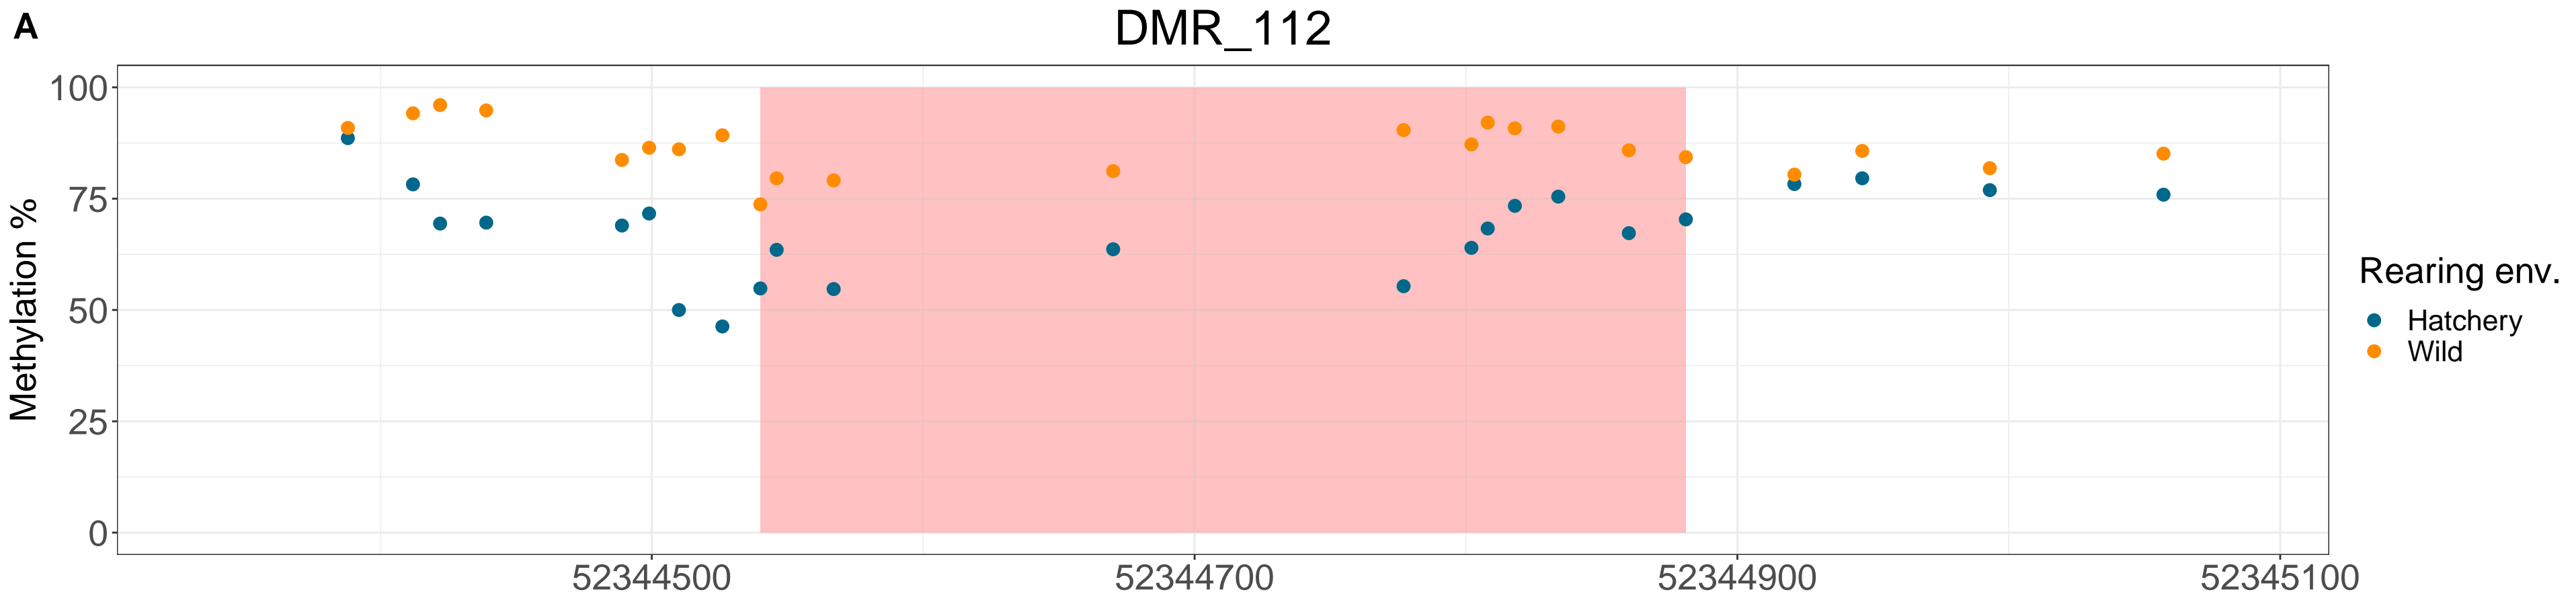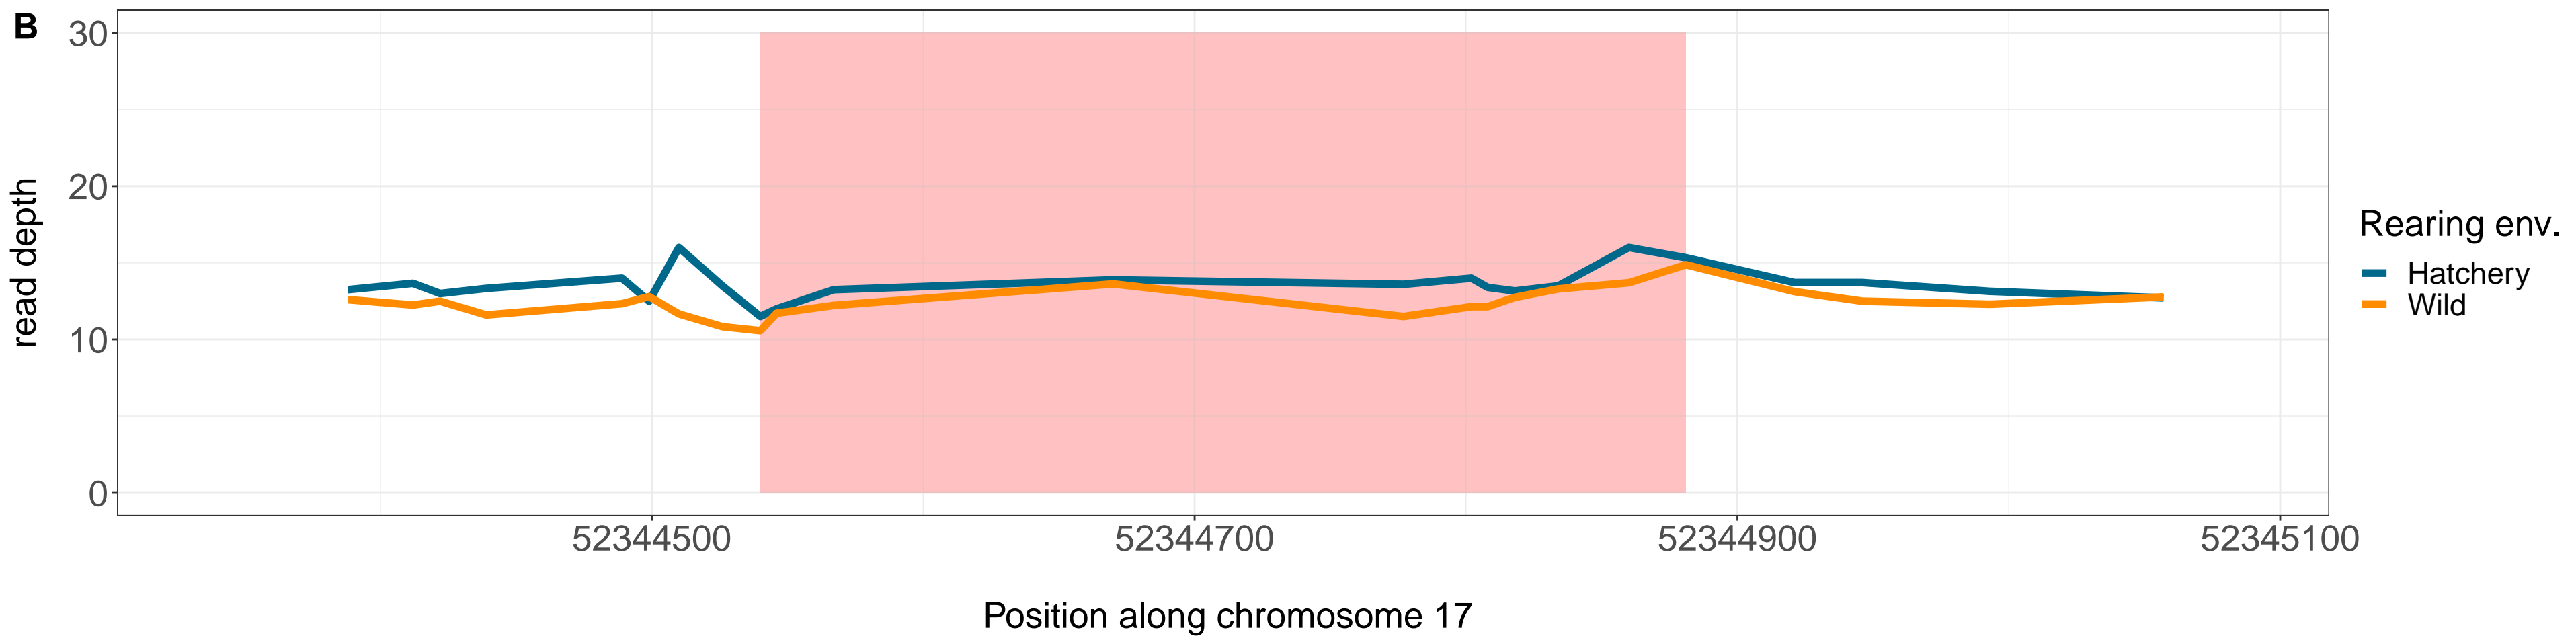

**A**

## DMR\_113

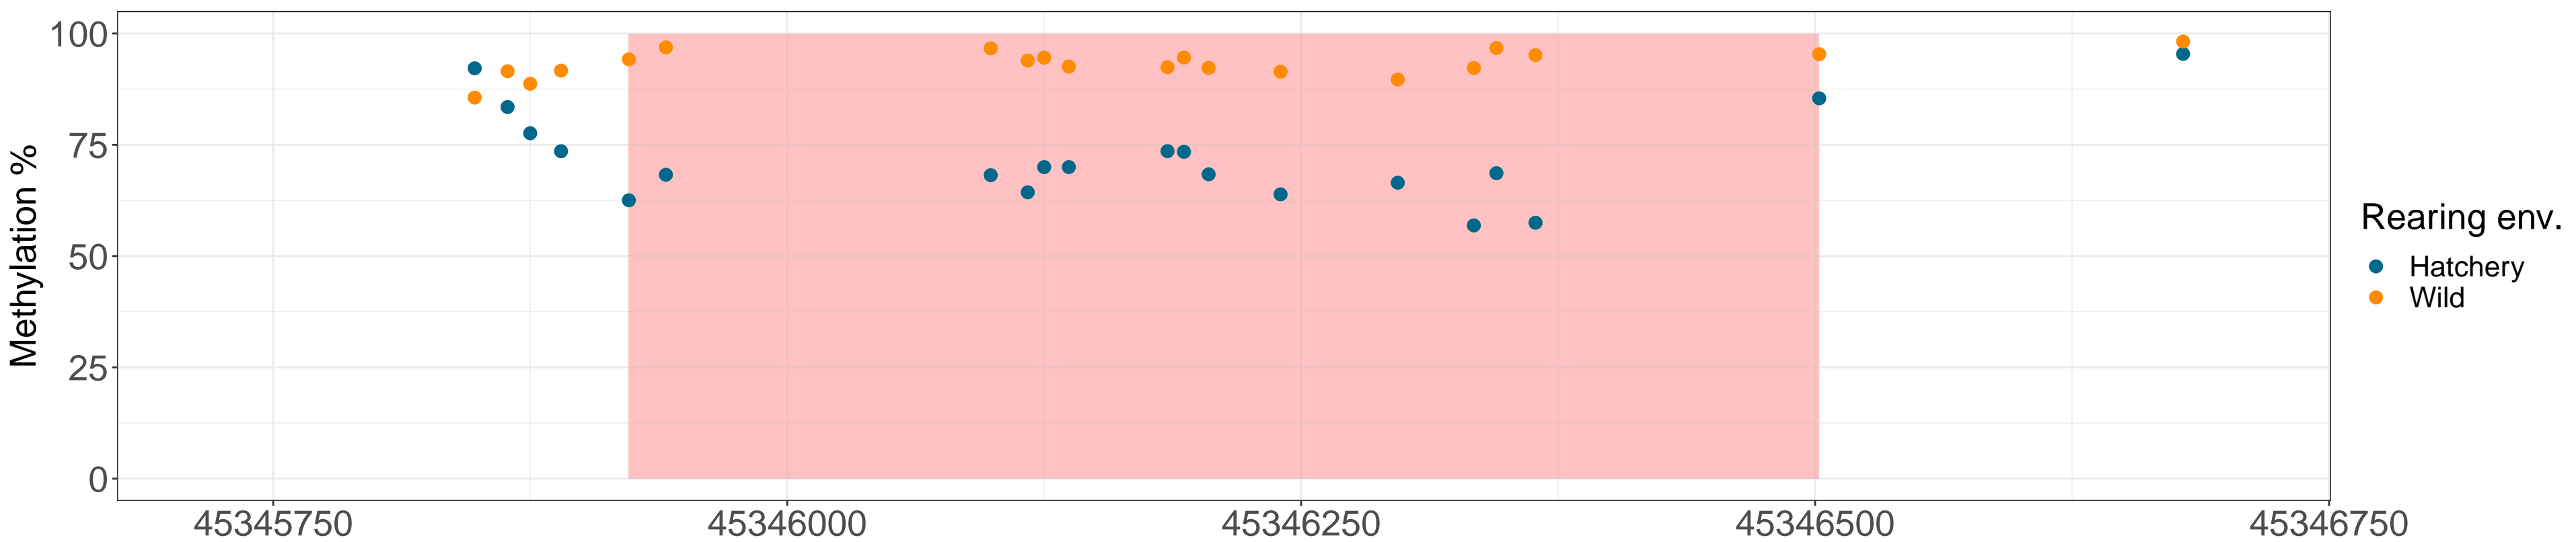**B**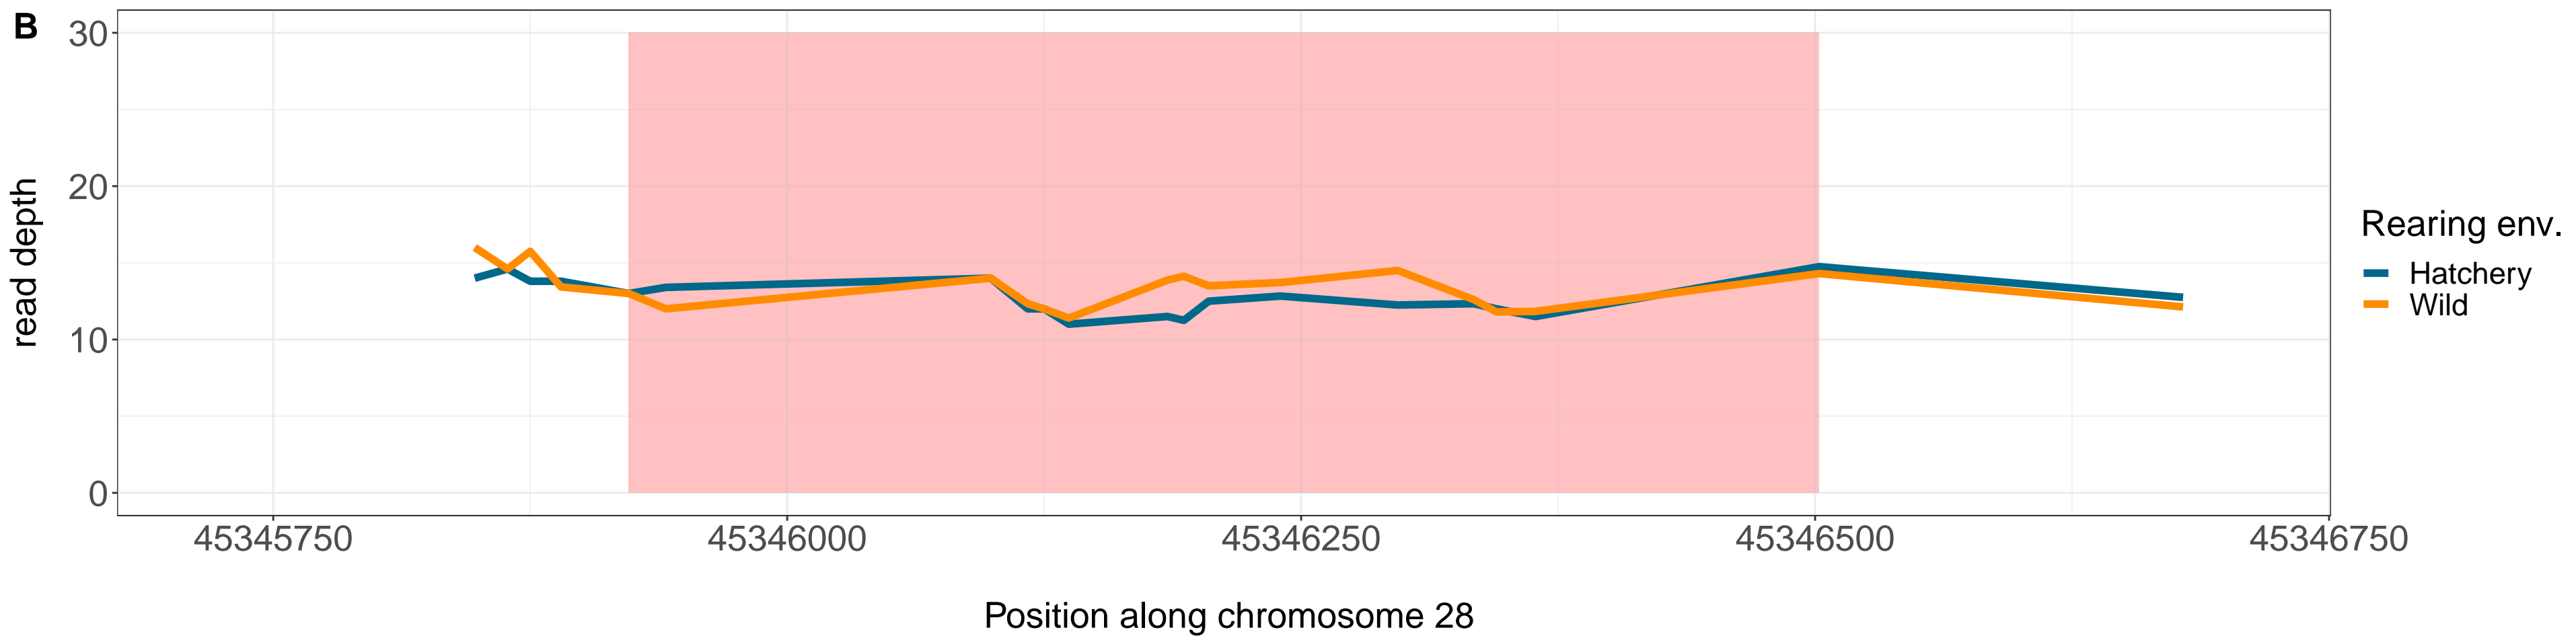

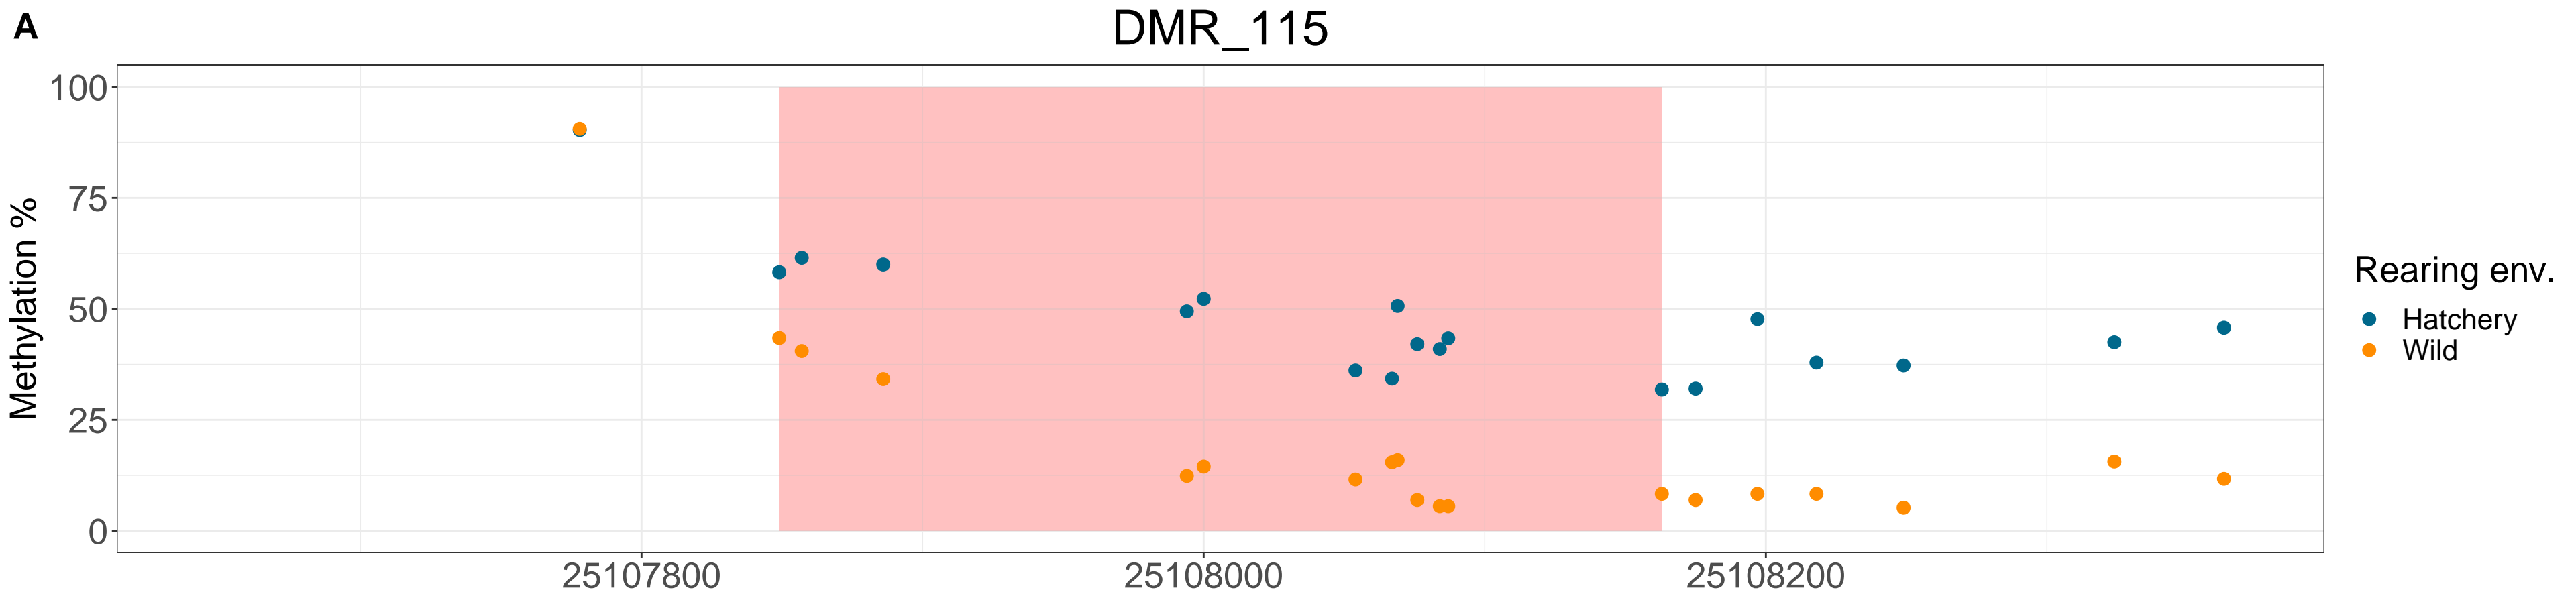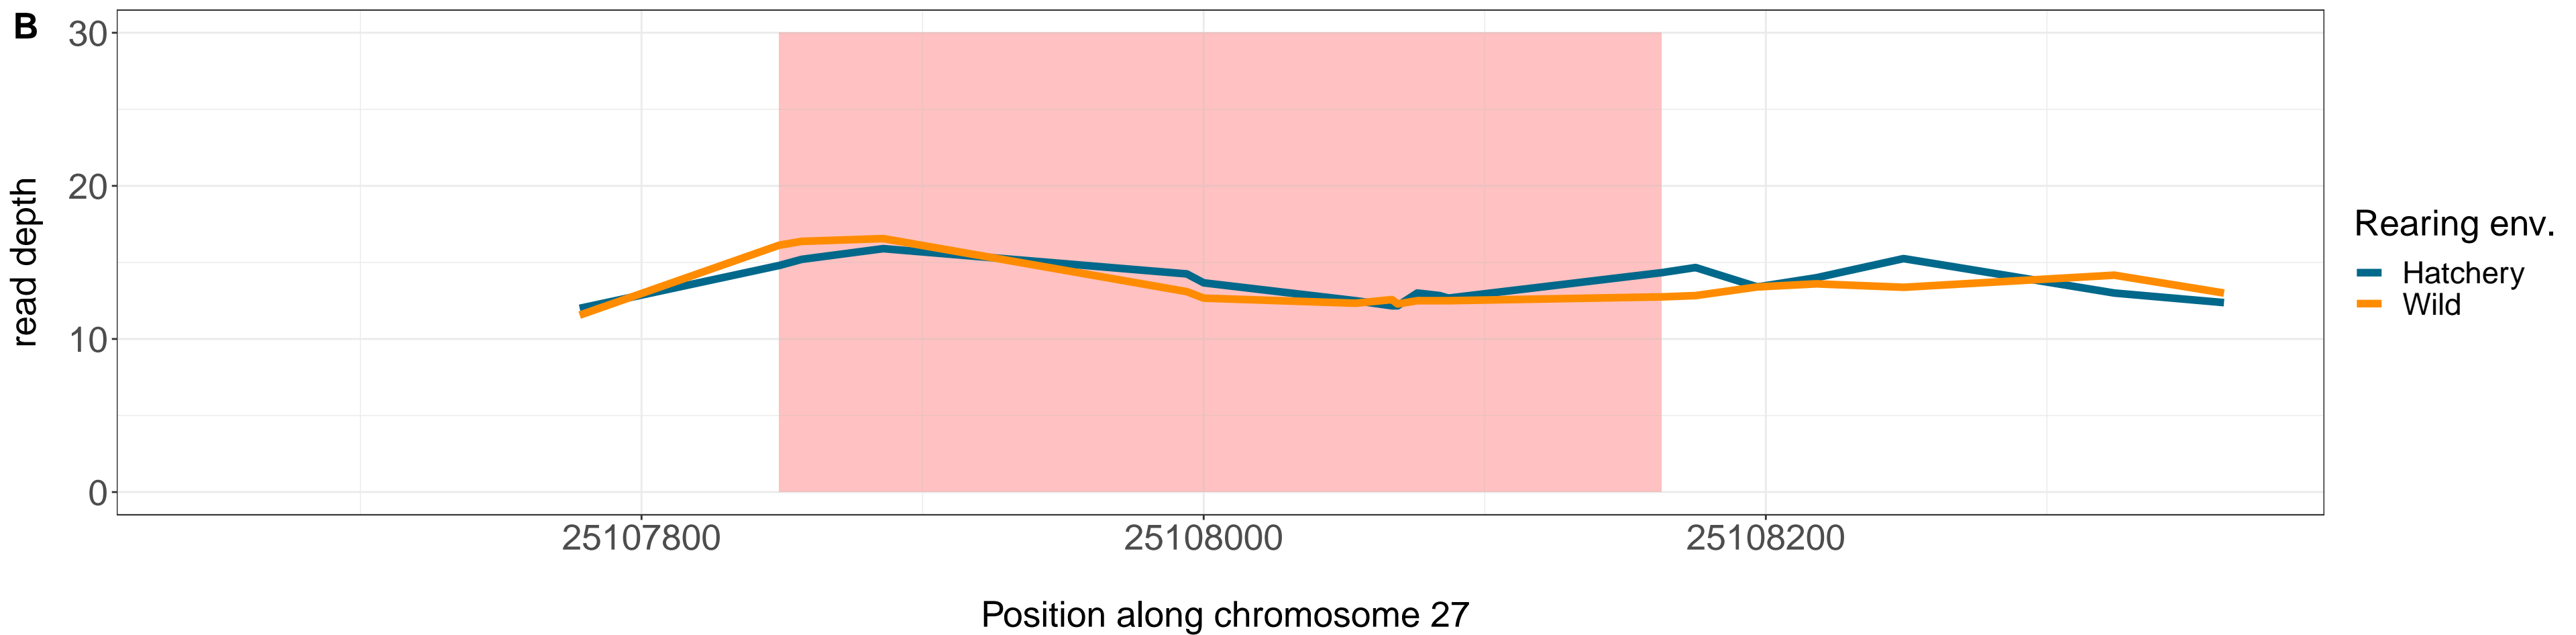

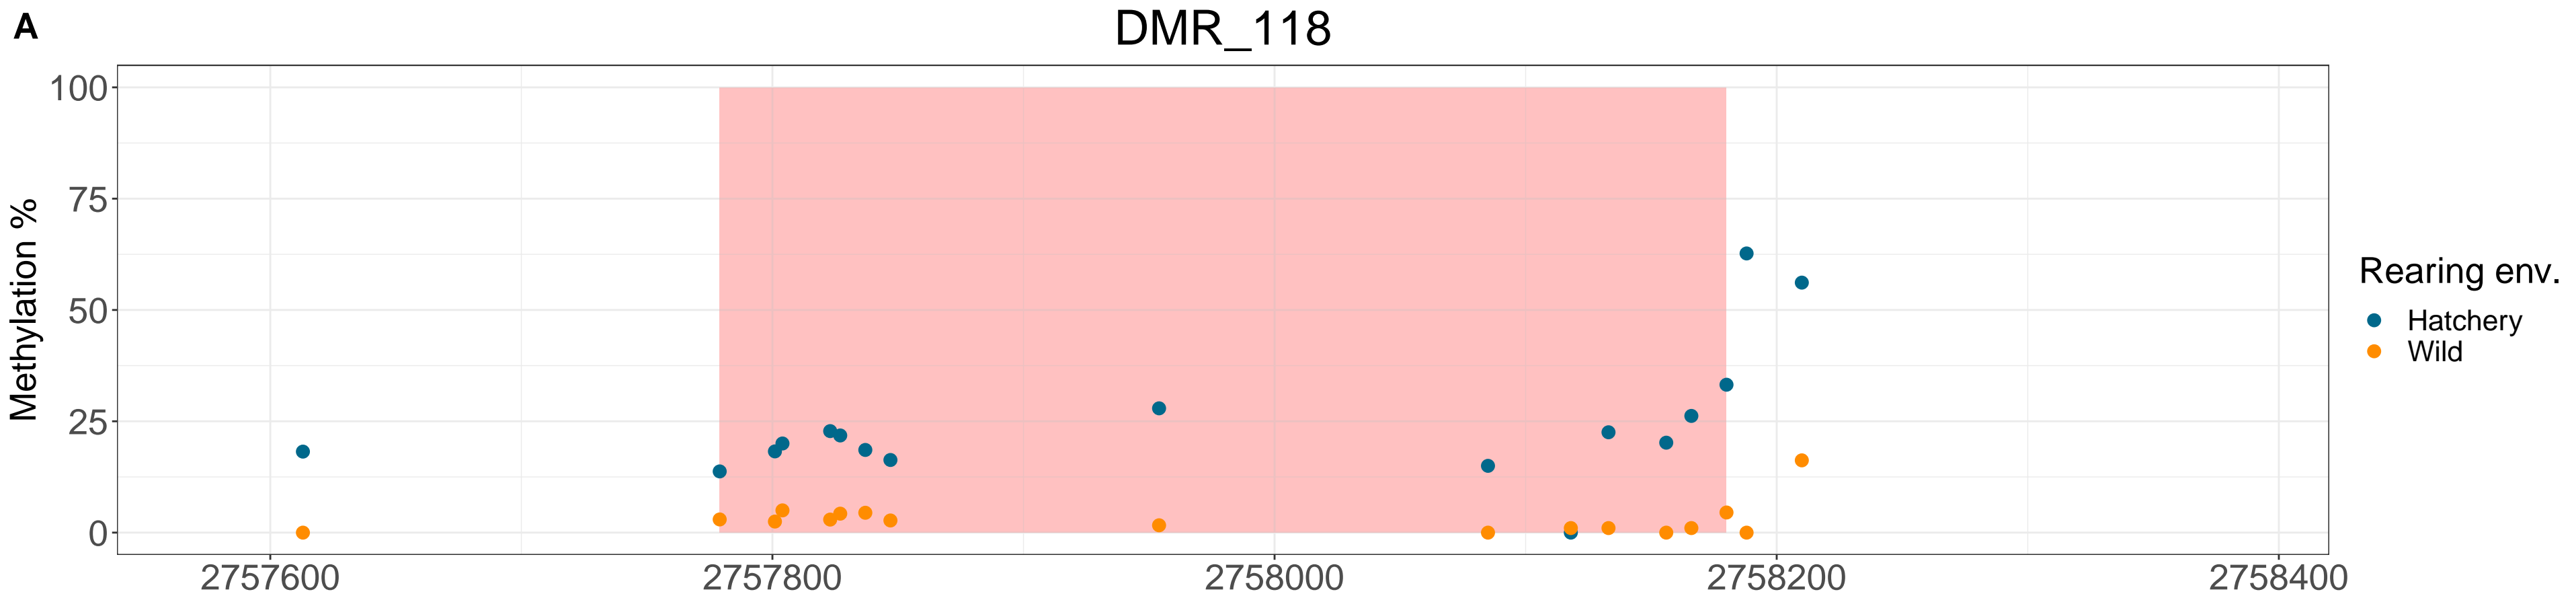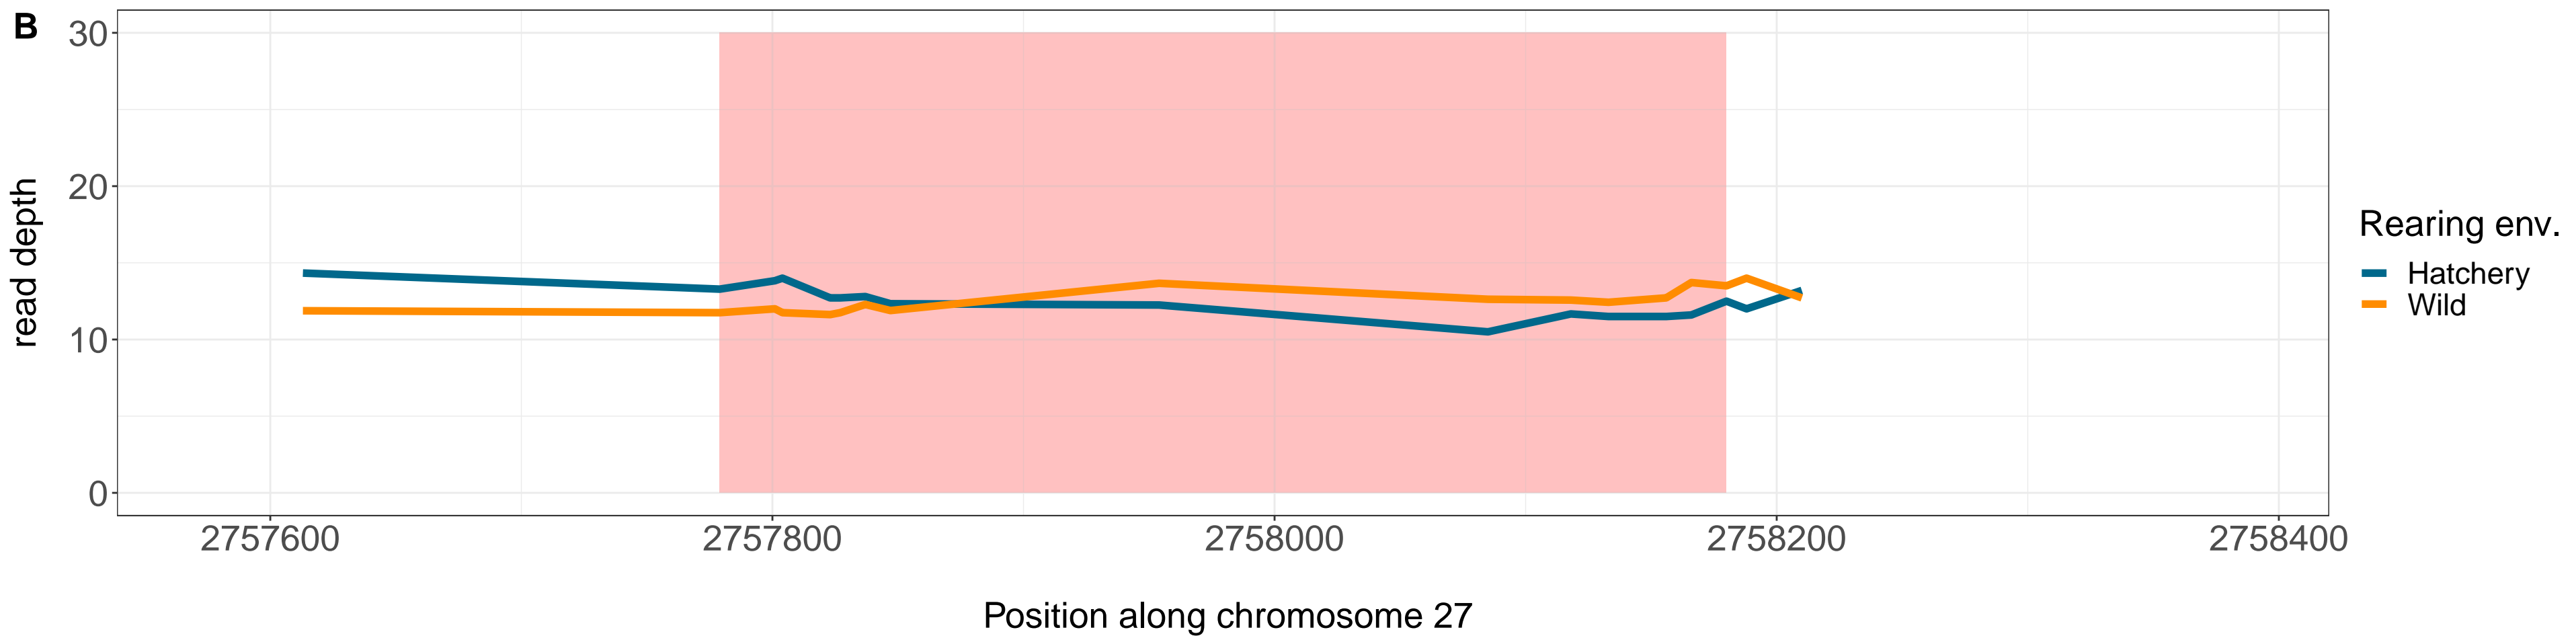

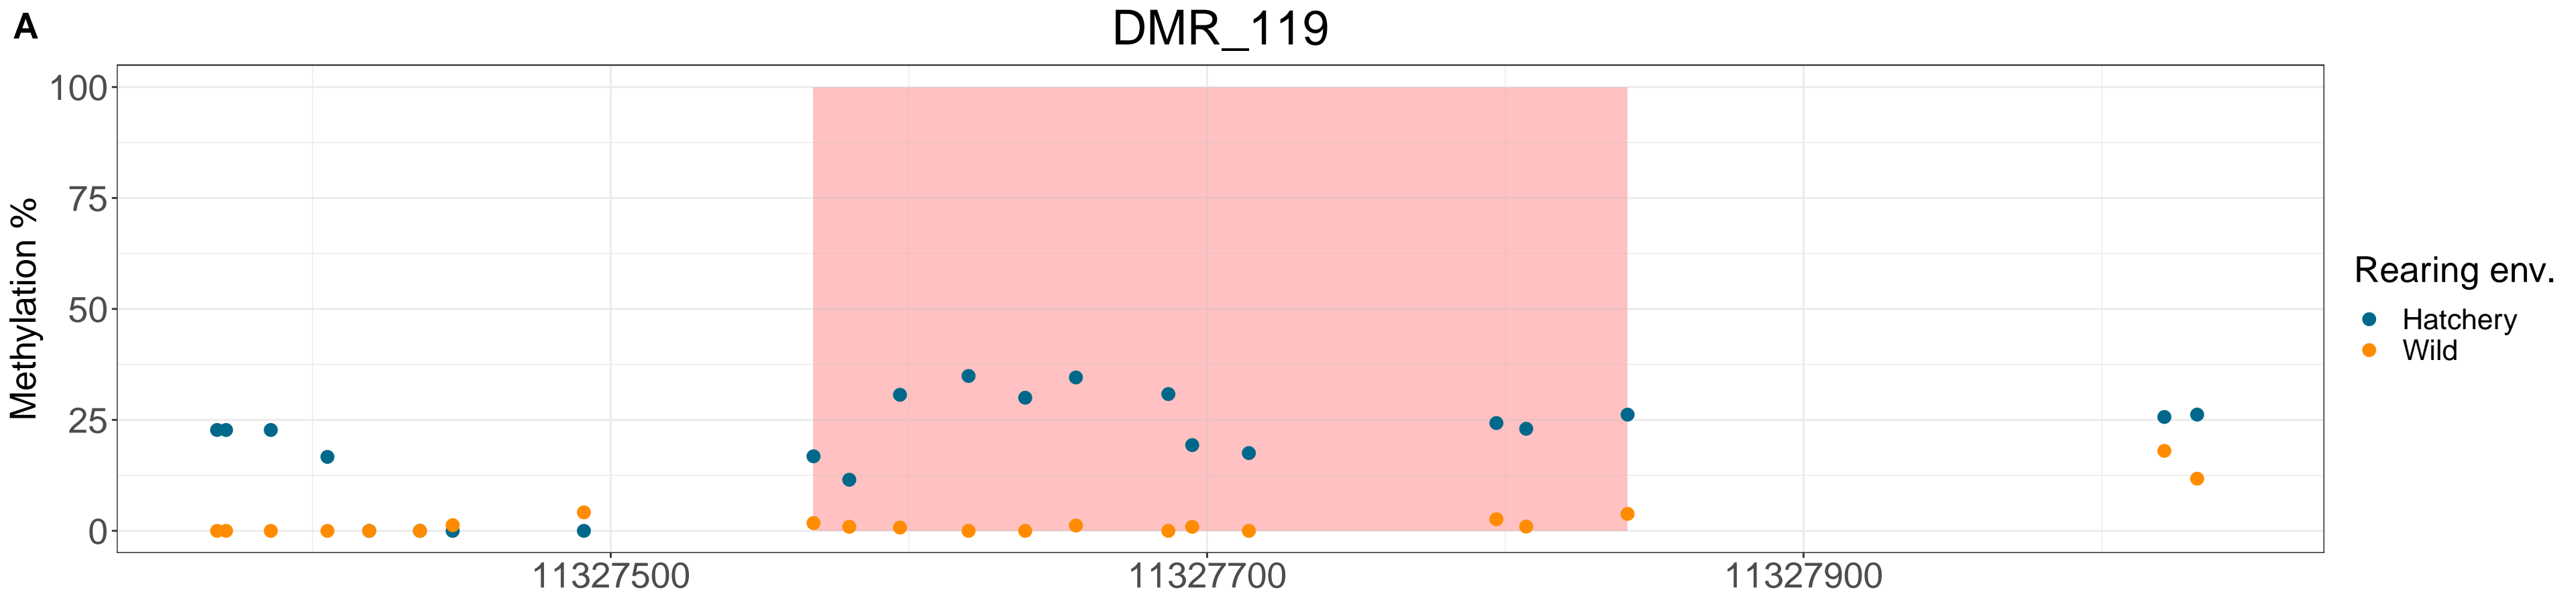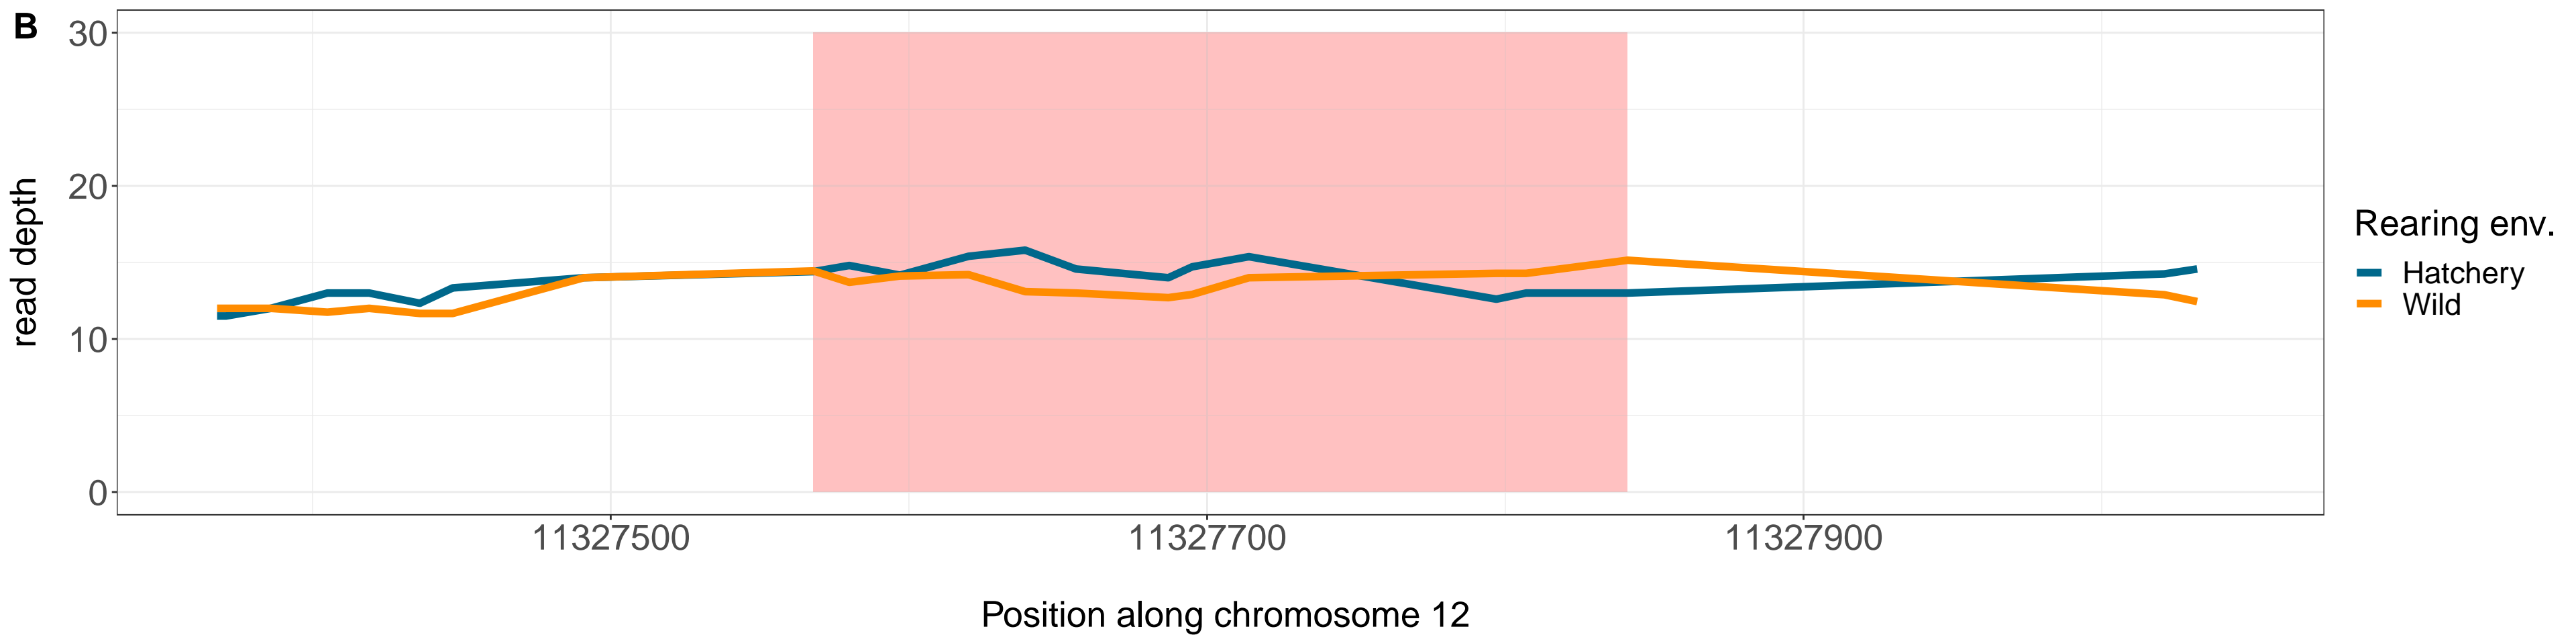

# DMR\_120

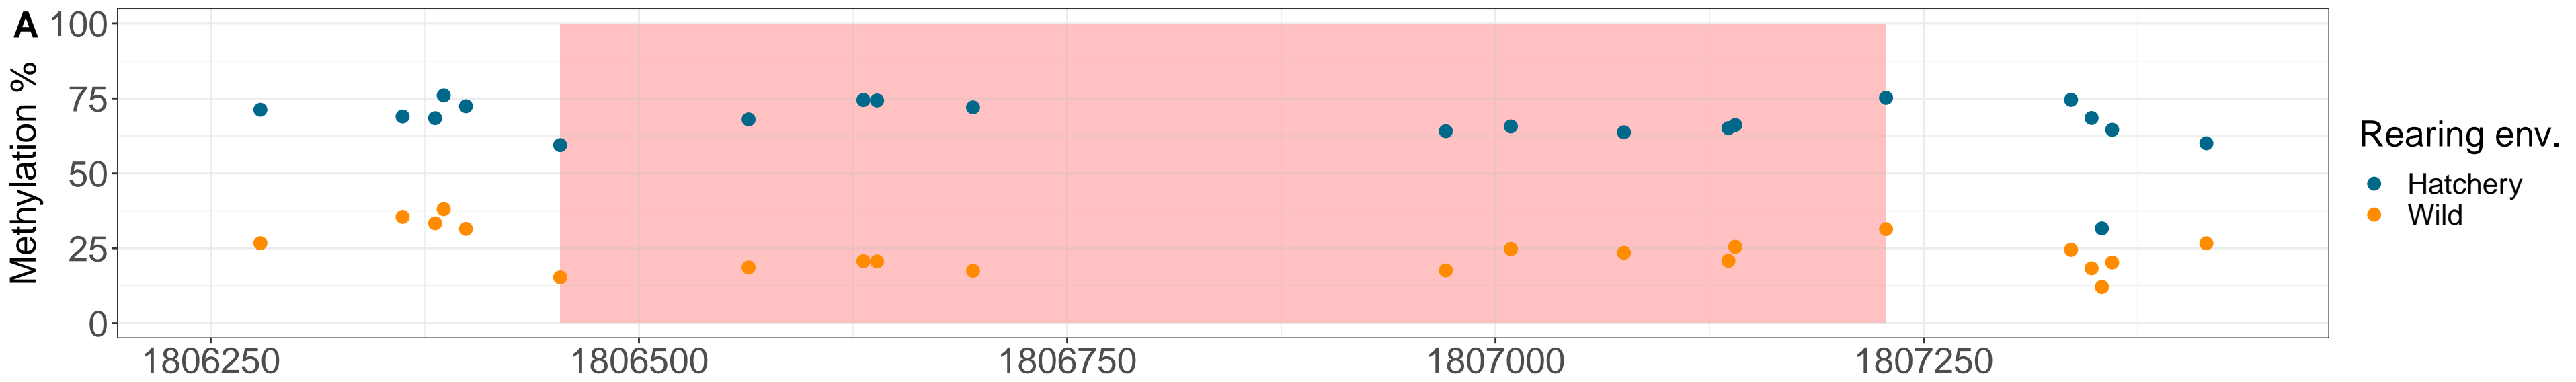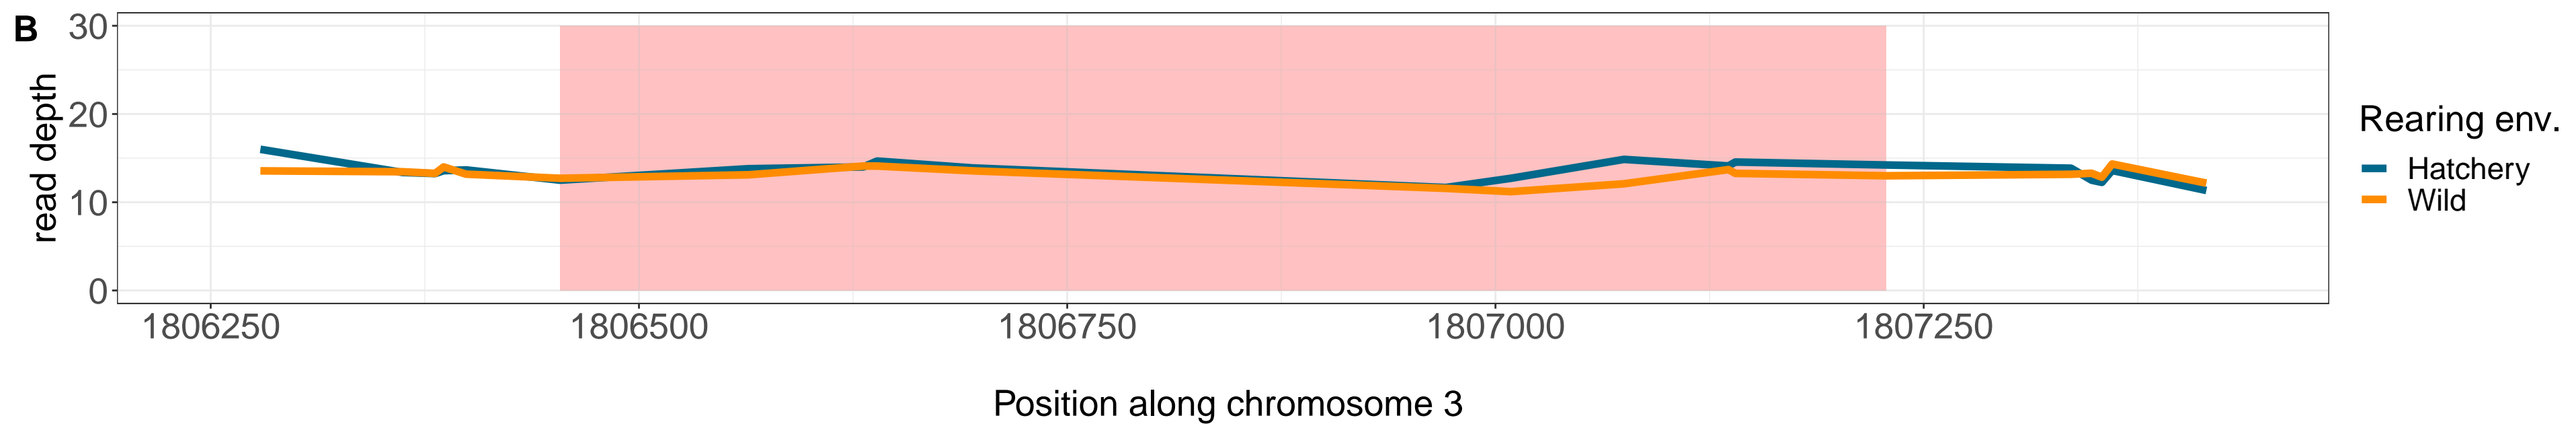

Position along chromosome 3



# DMR\_121

XM\_020463221.1

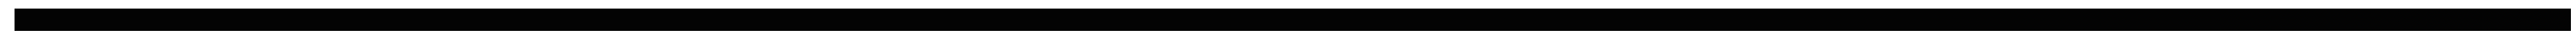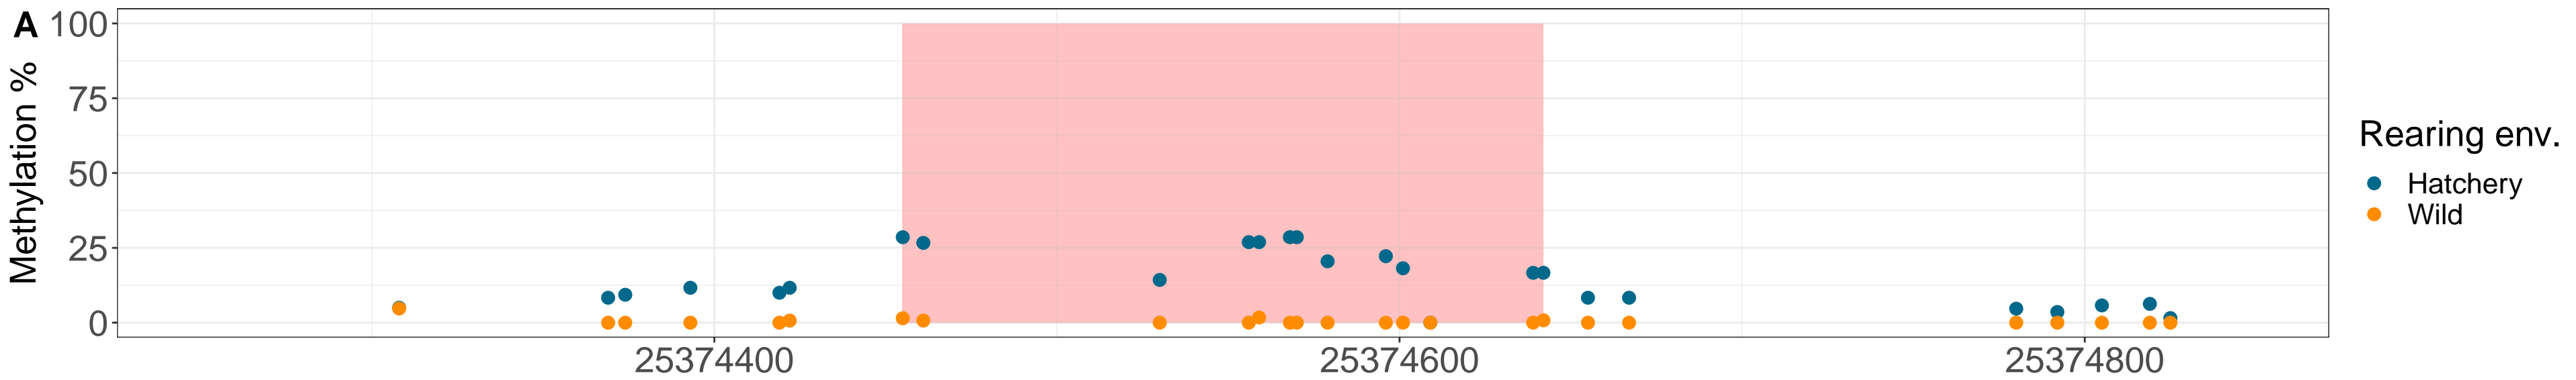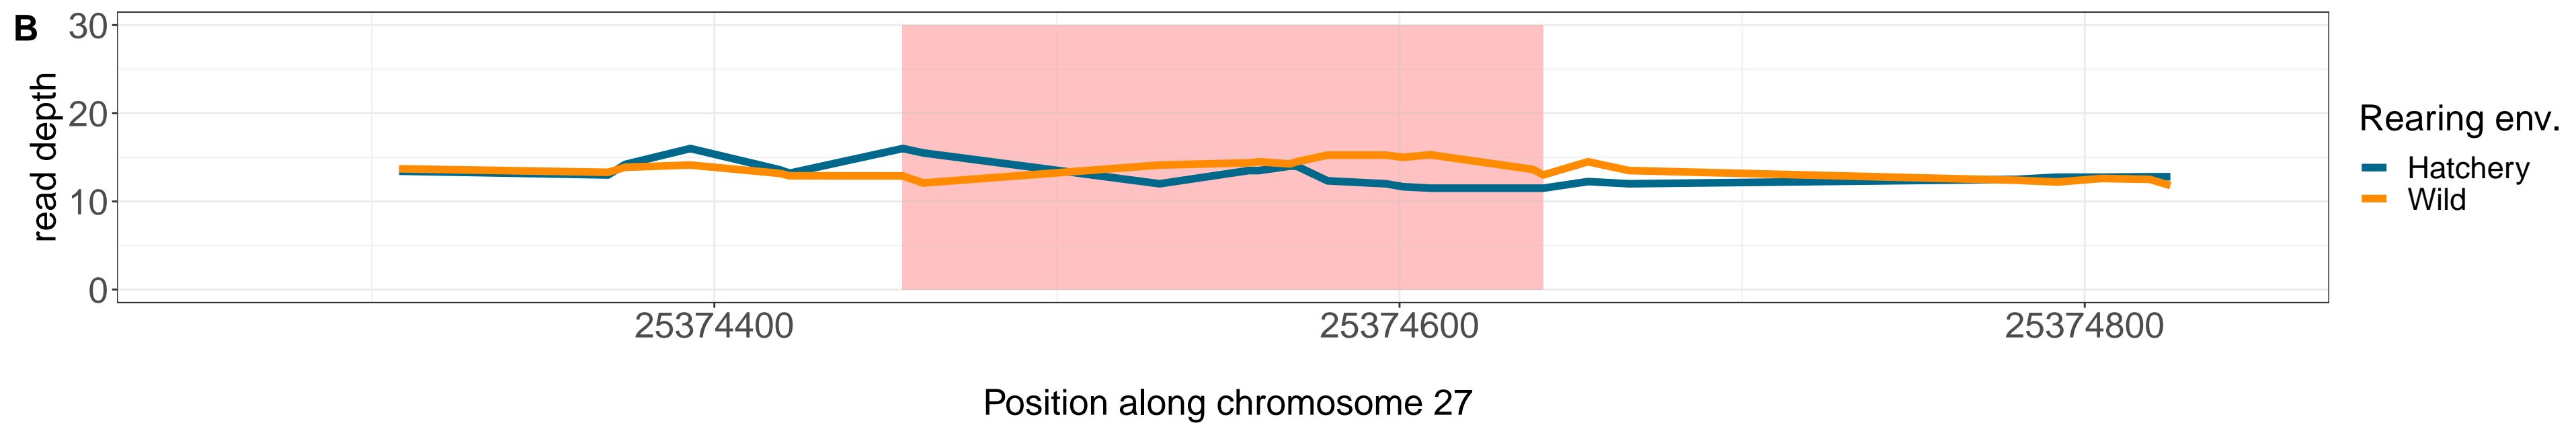

**A**

## DMR\_122

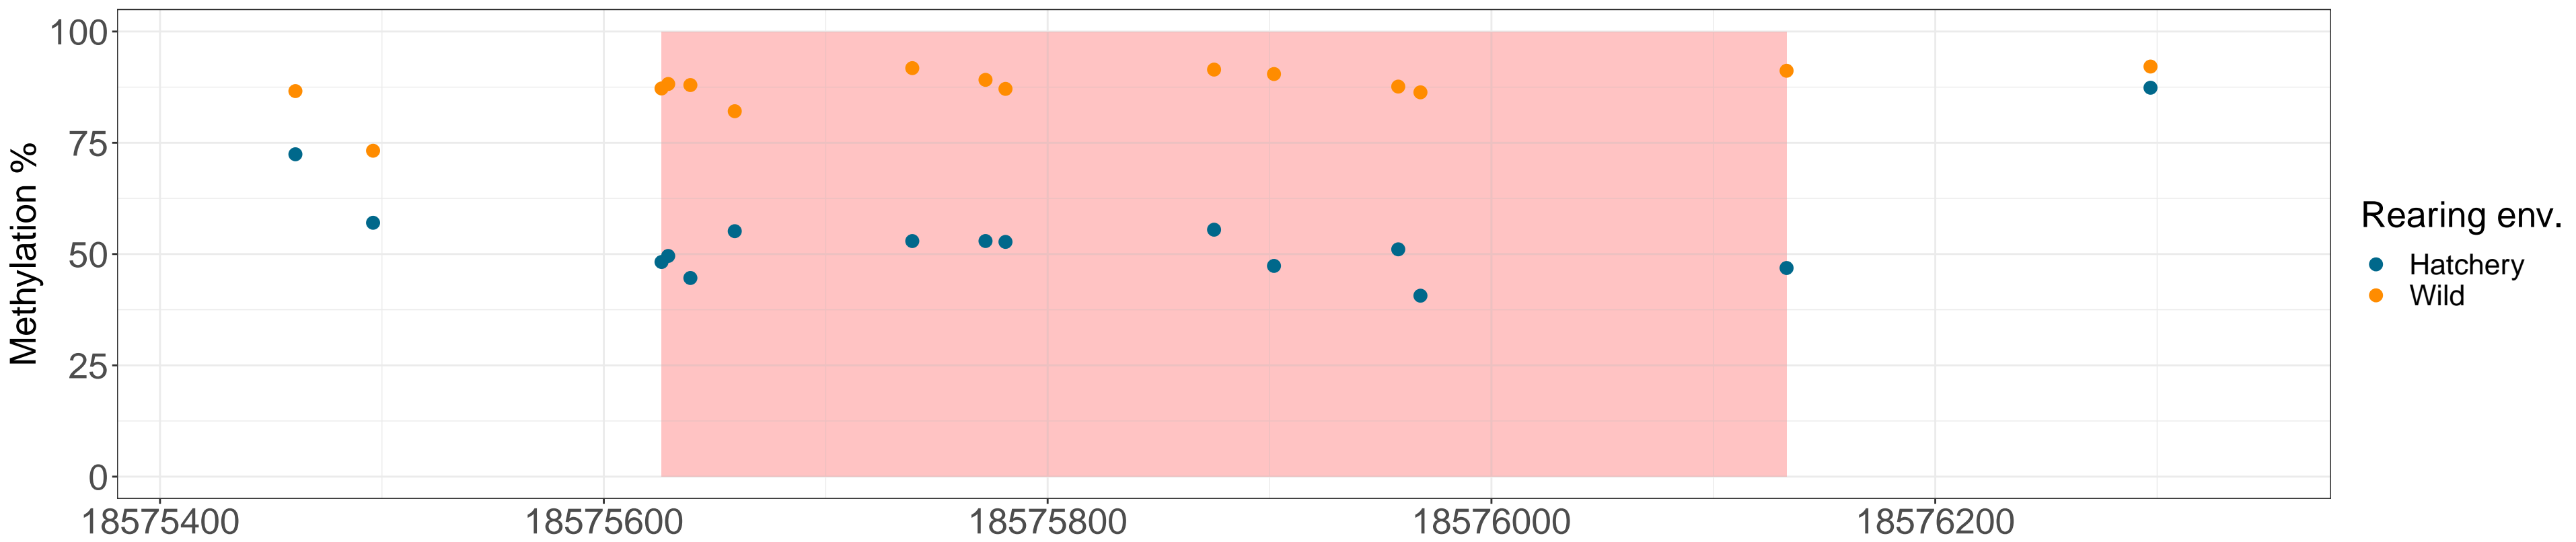**B**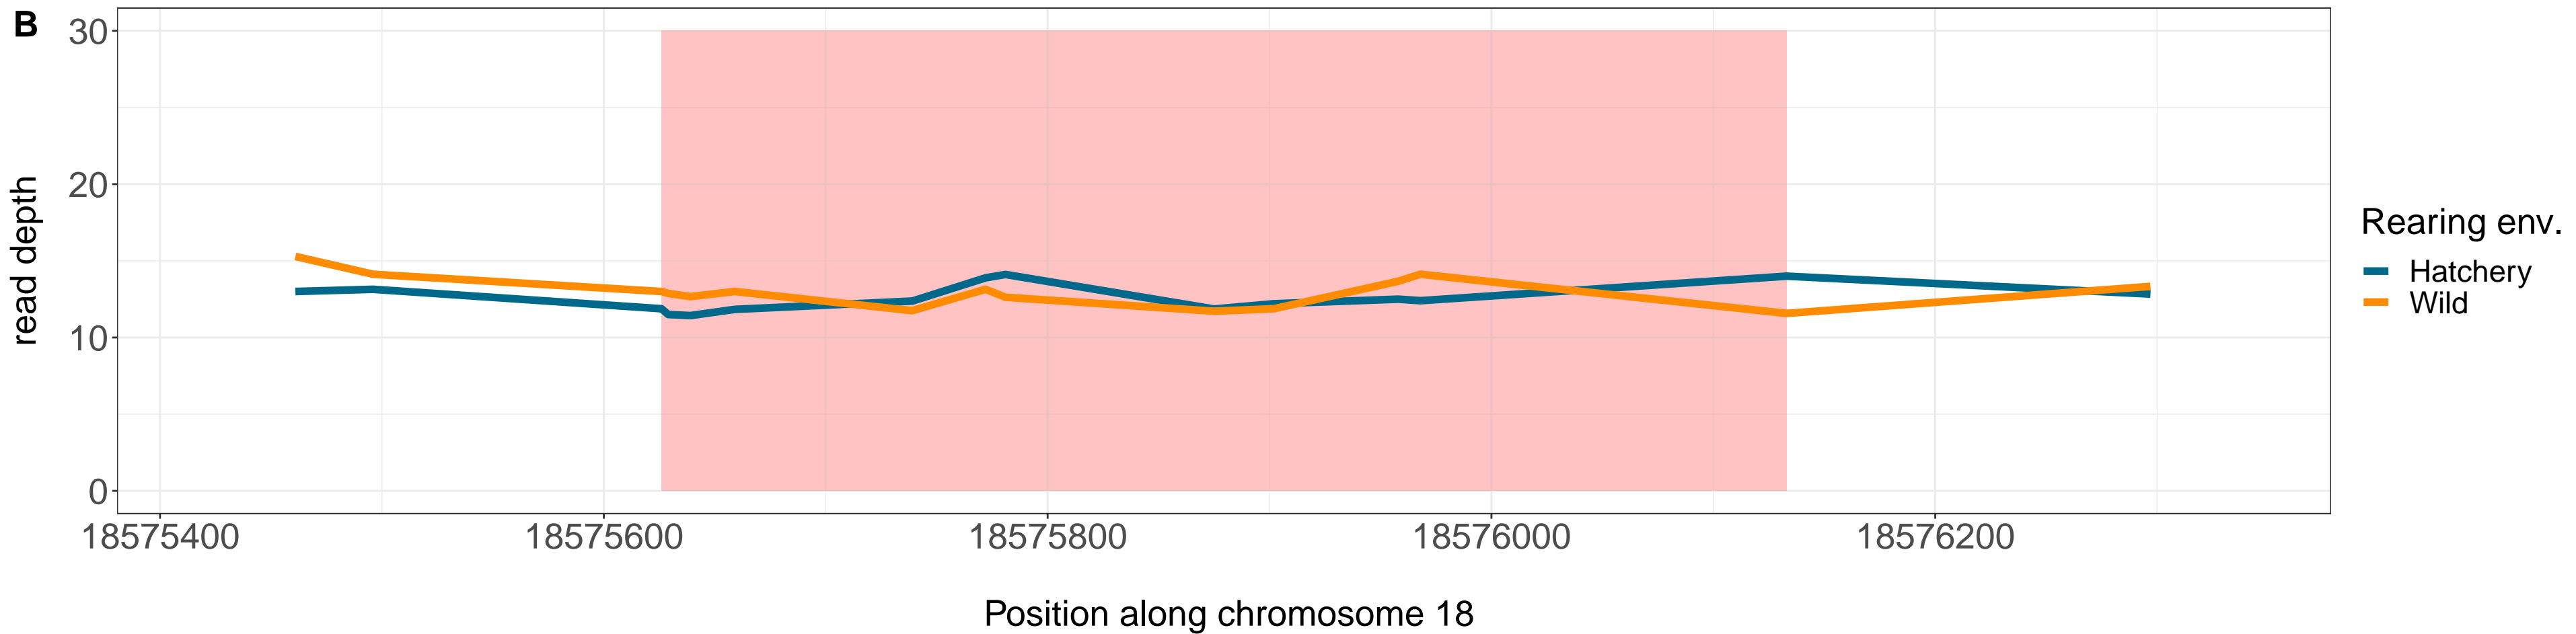

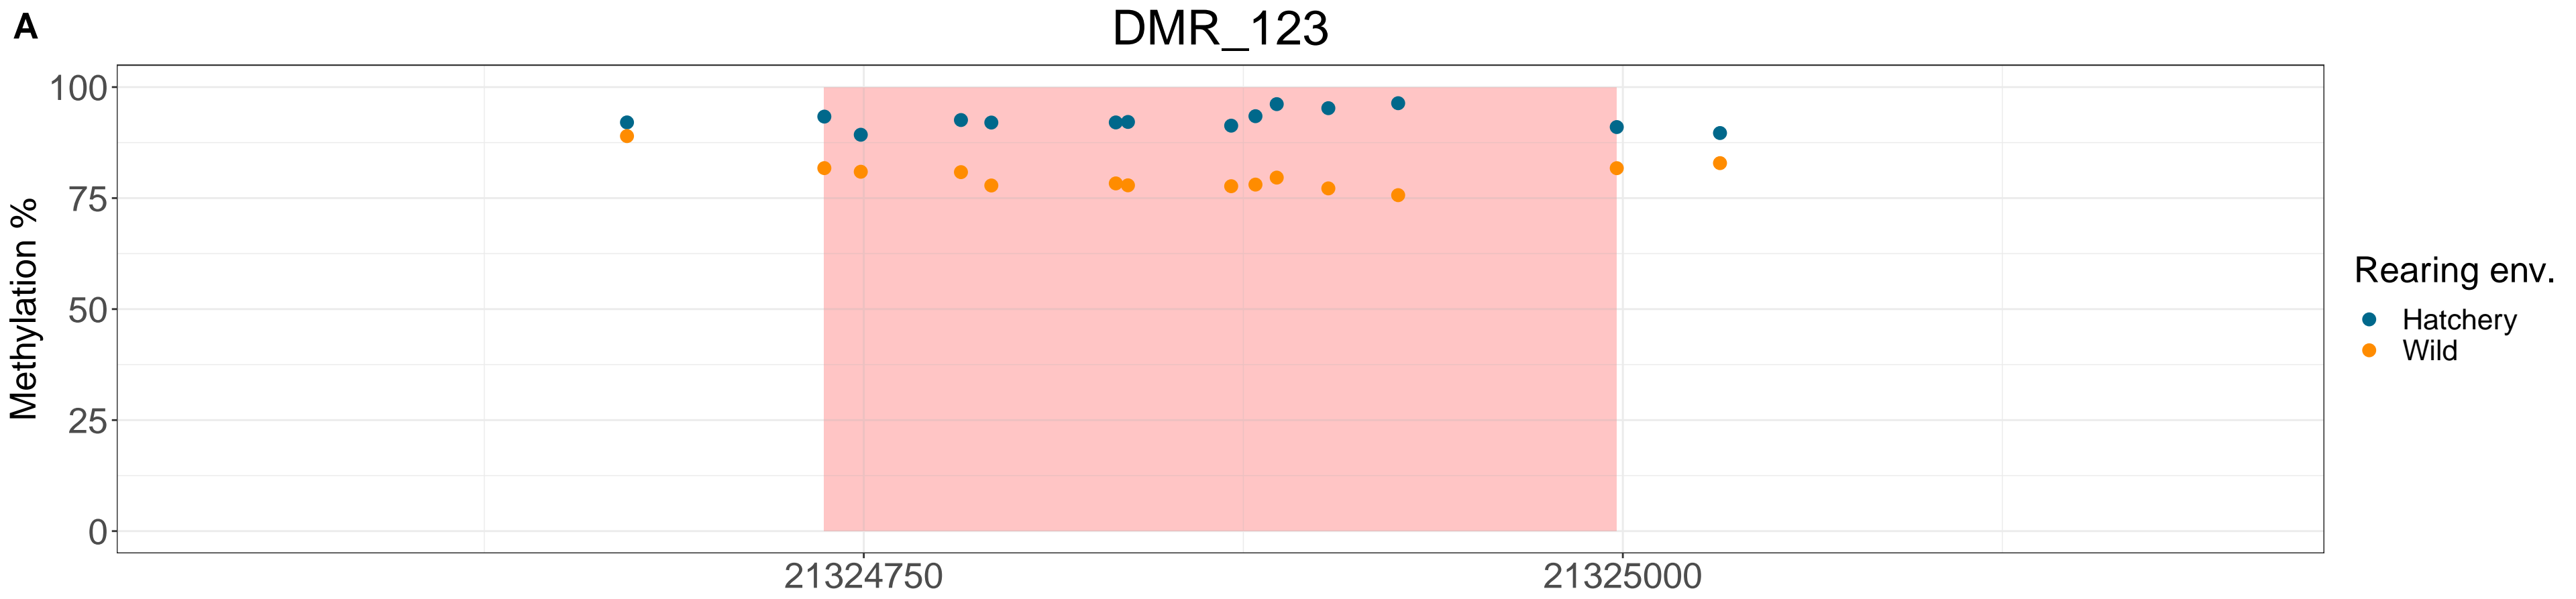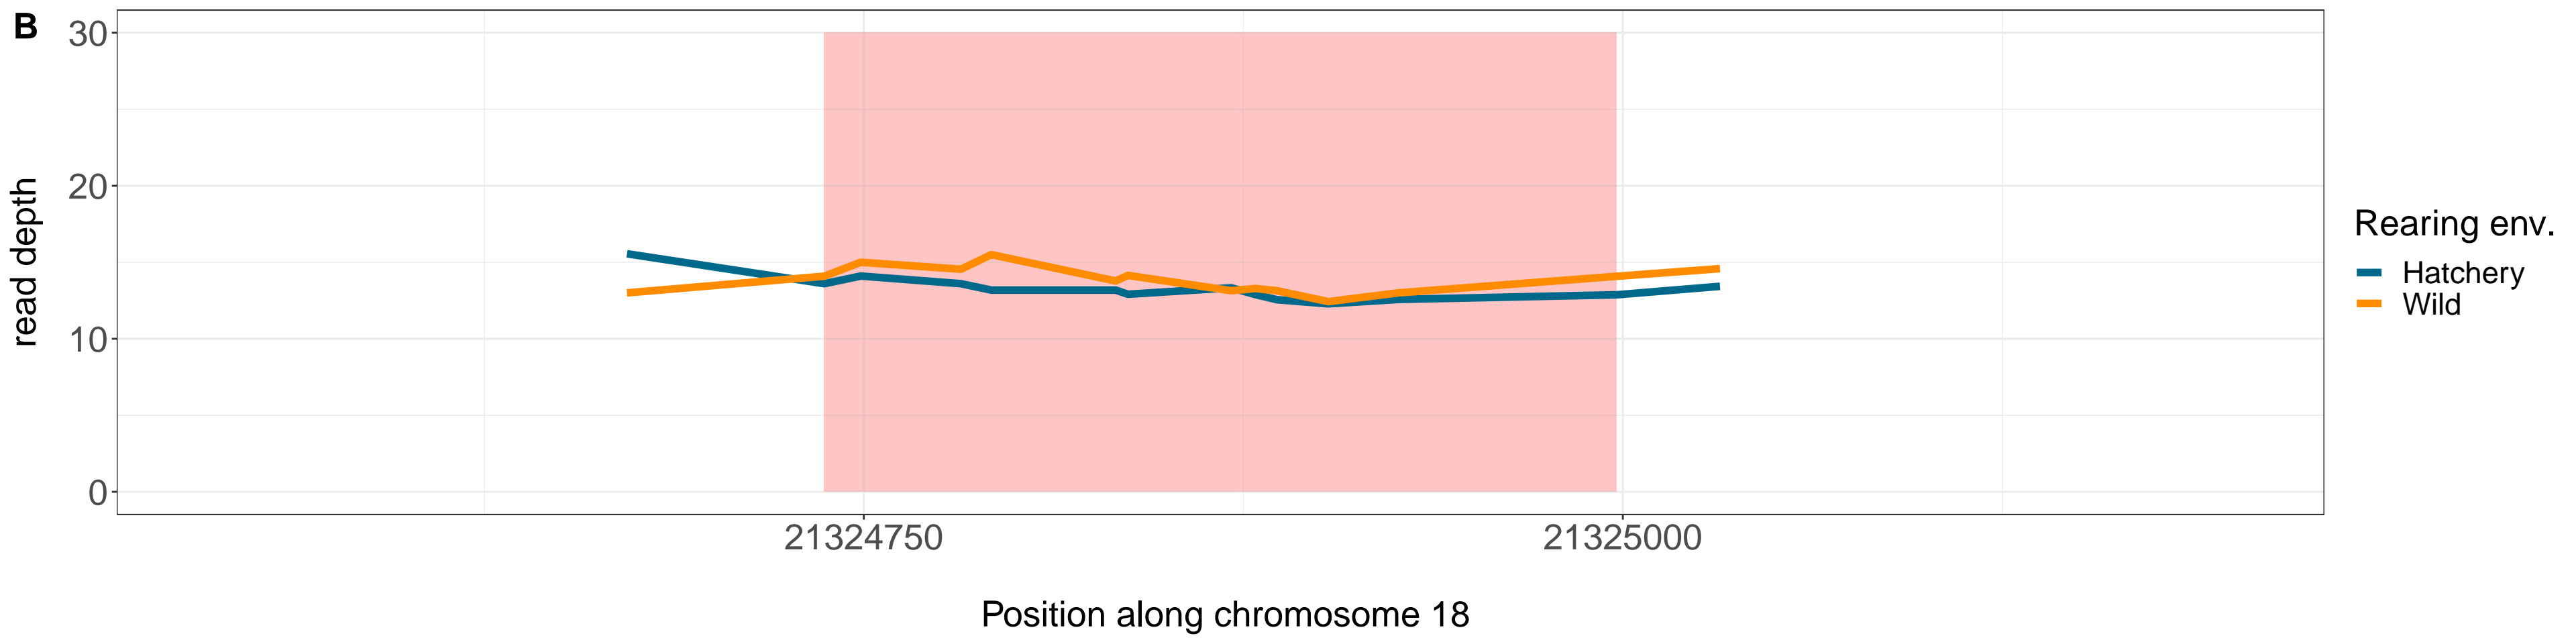

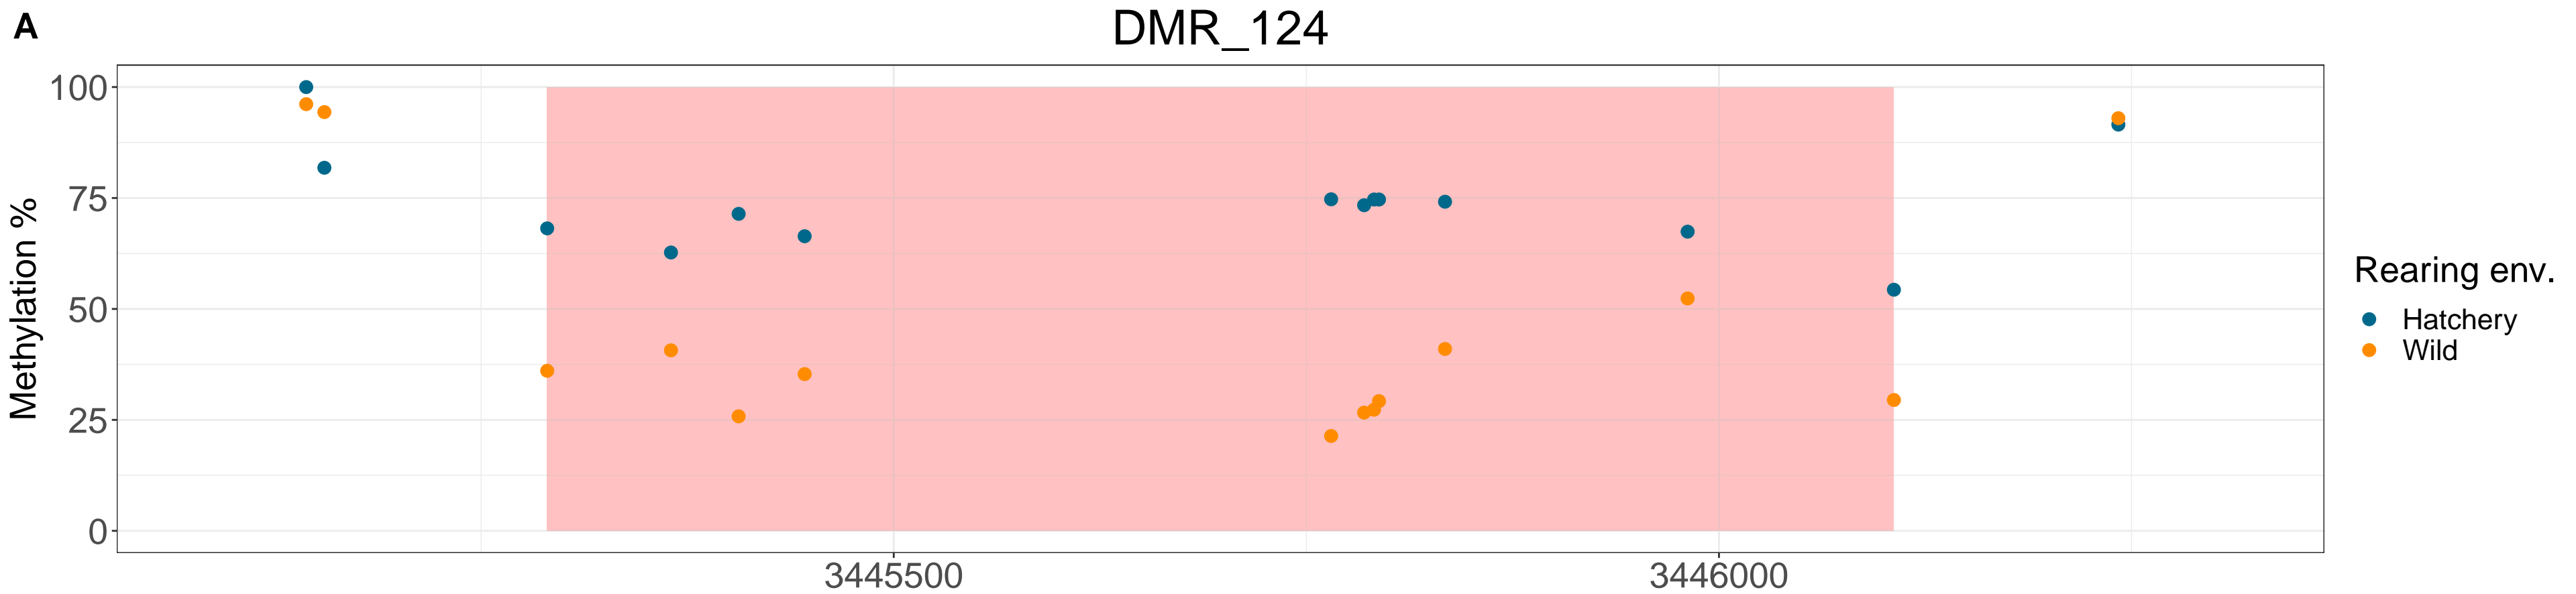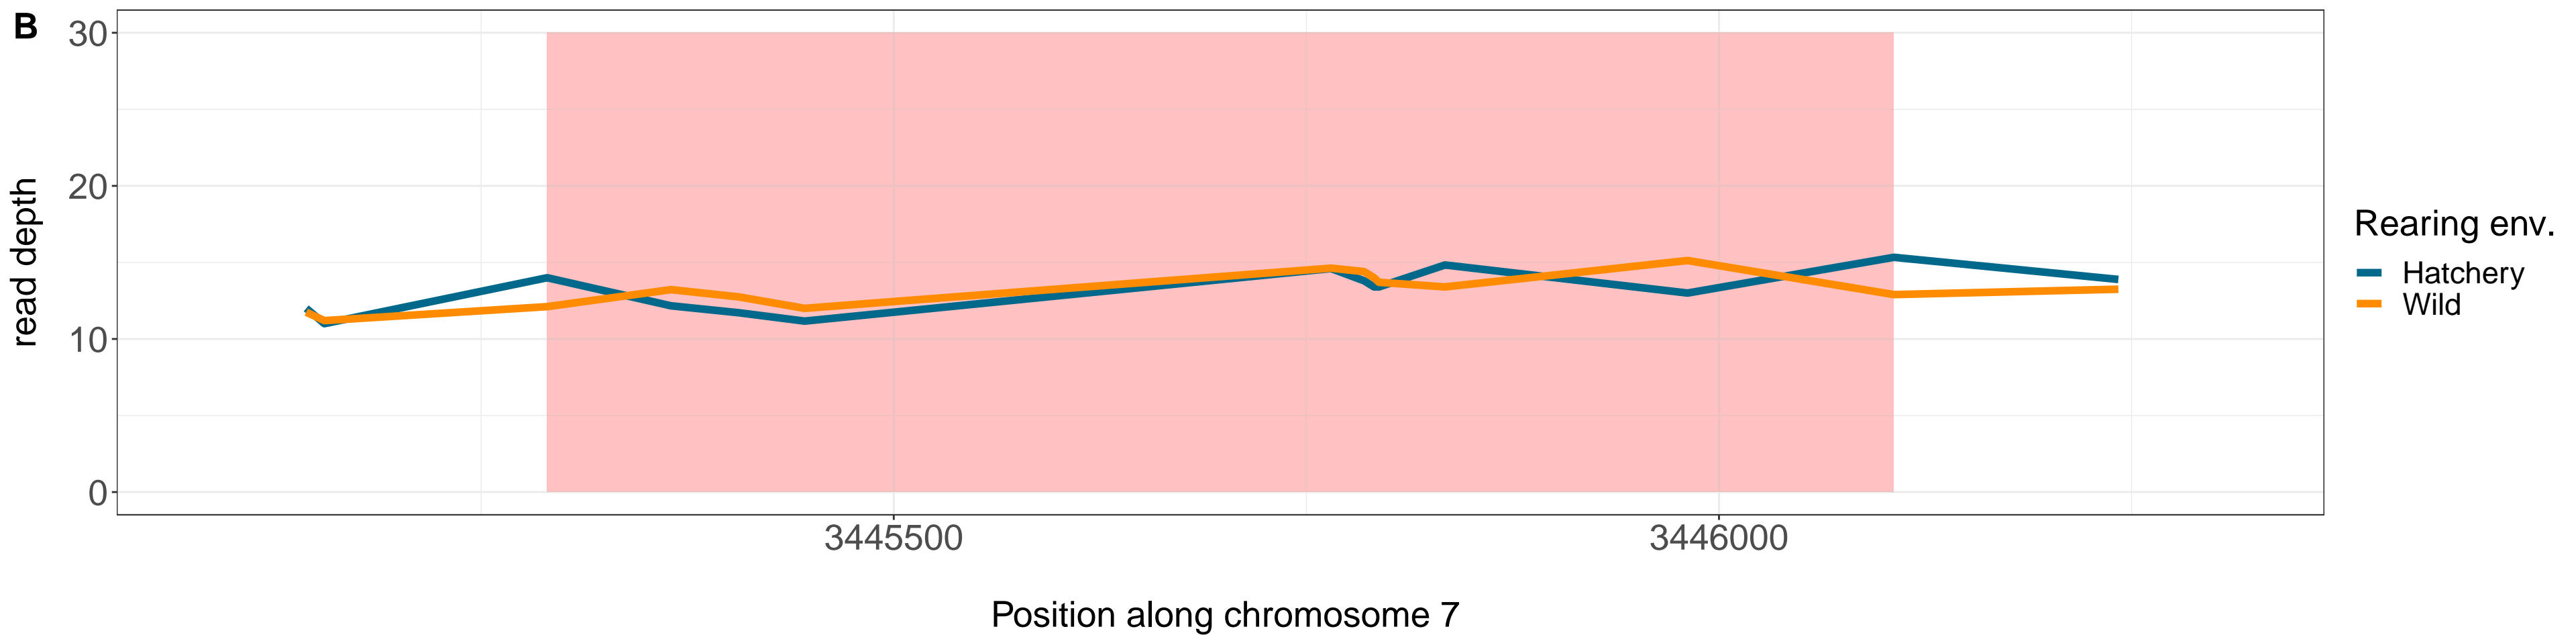

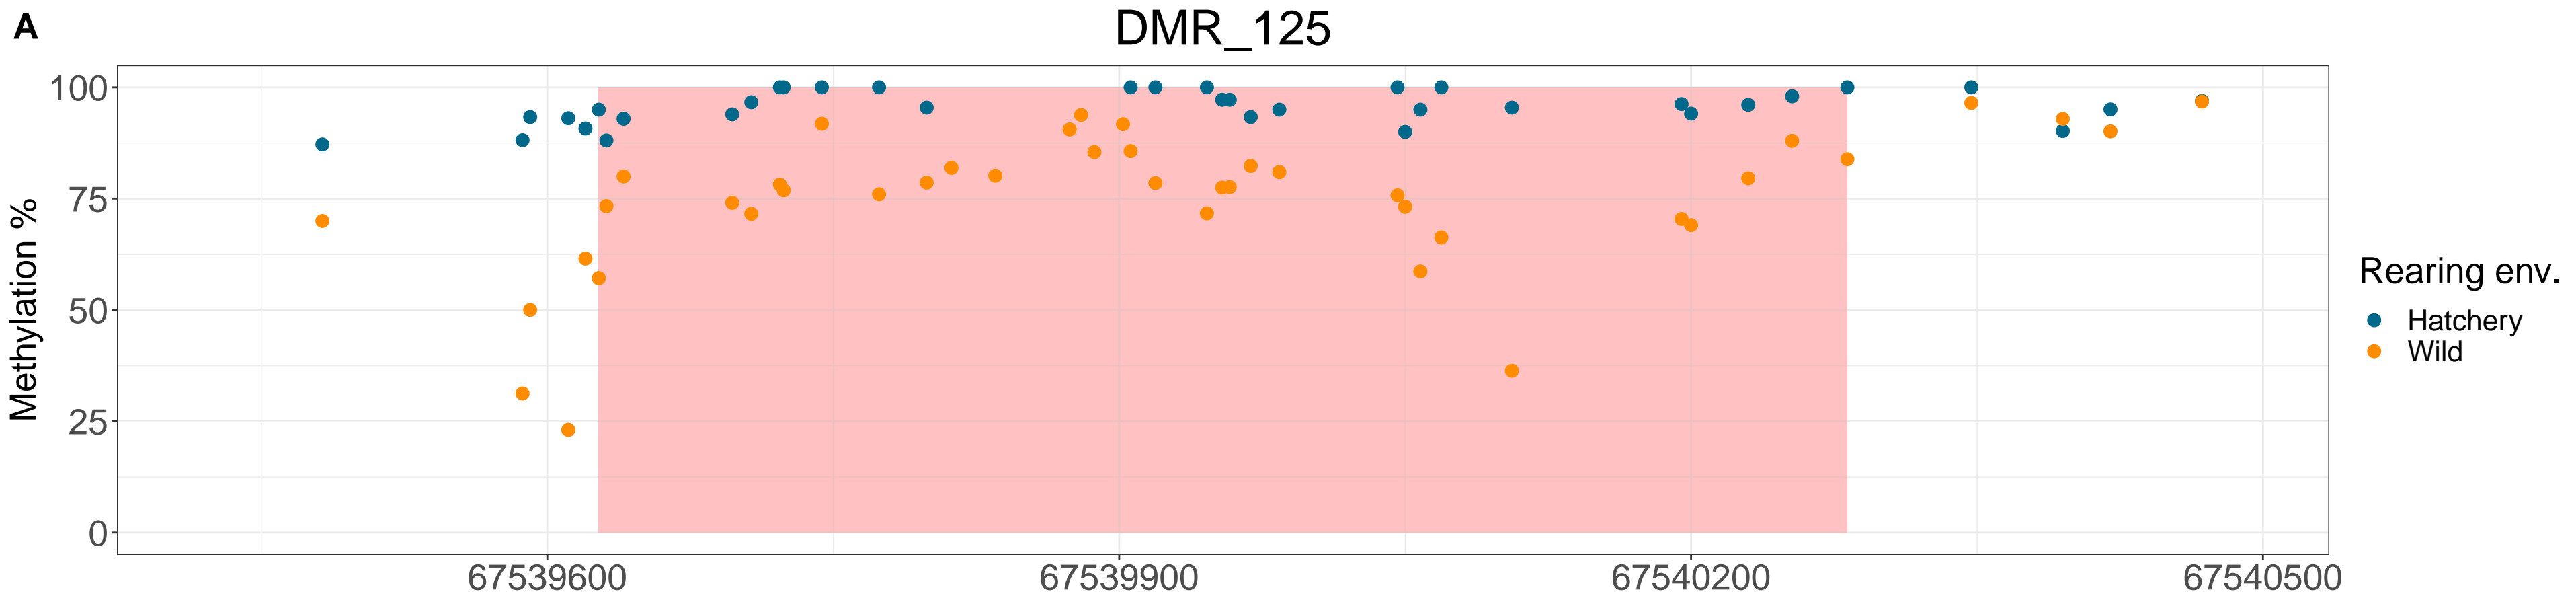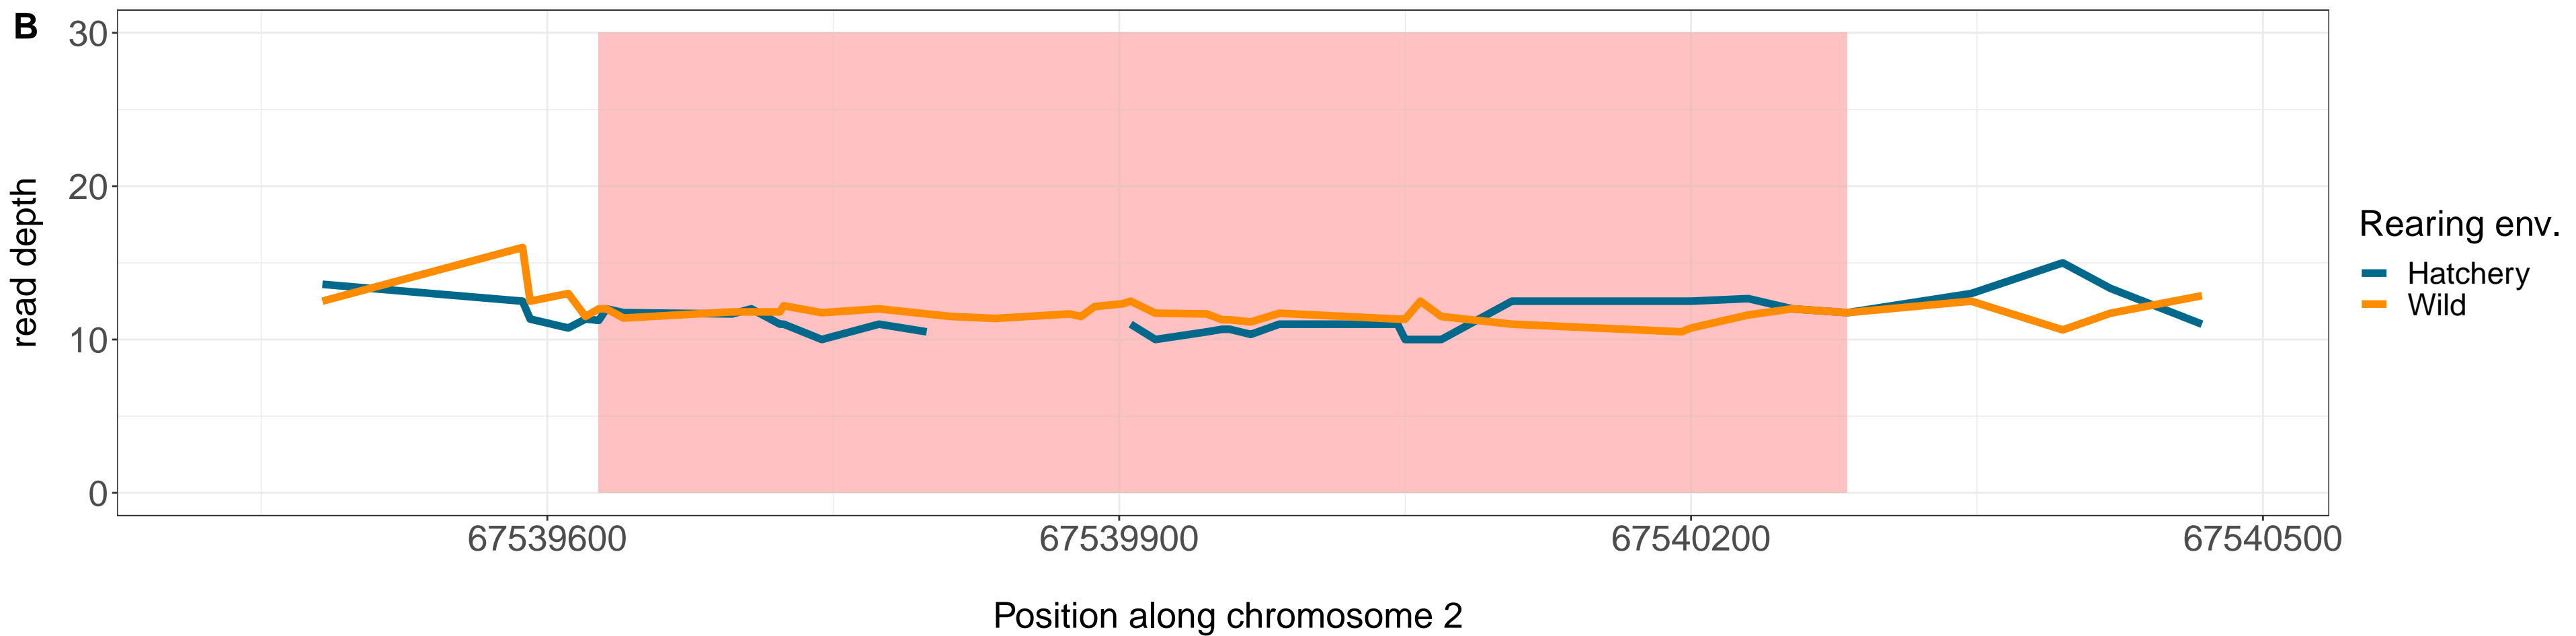

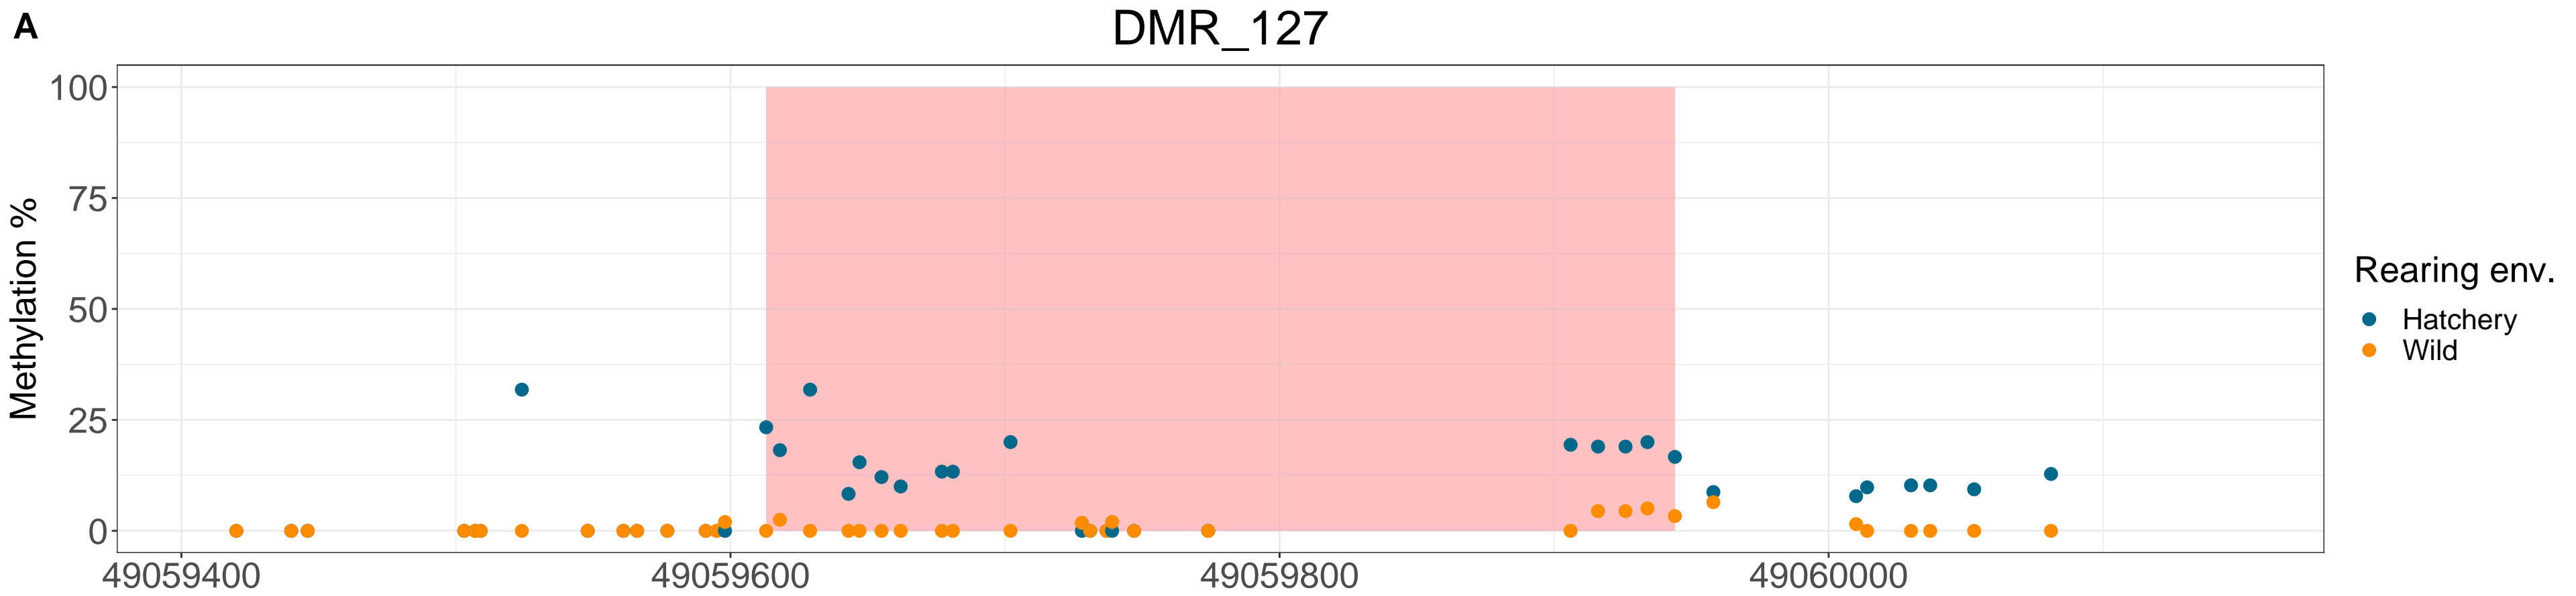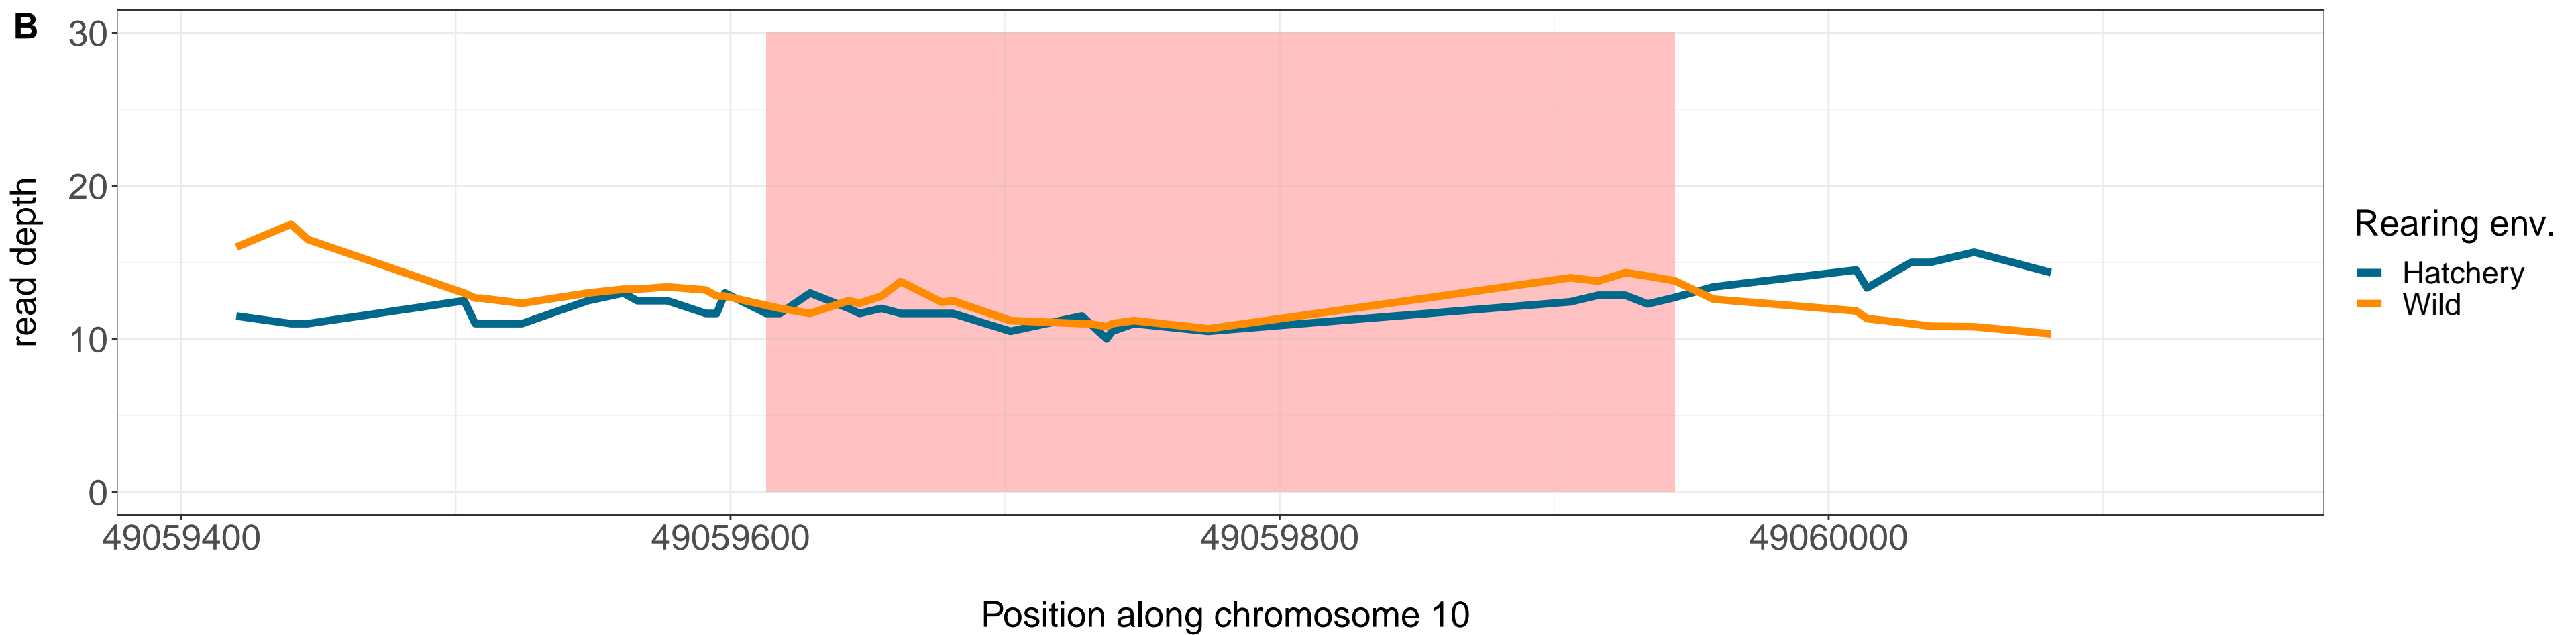

# DMR\_128

XM\_020491335.1

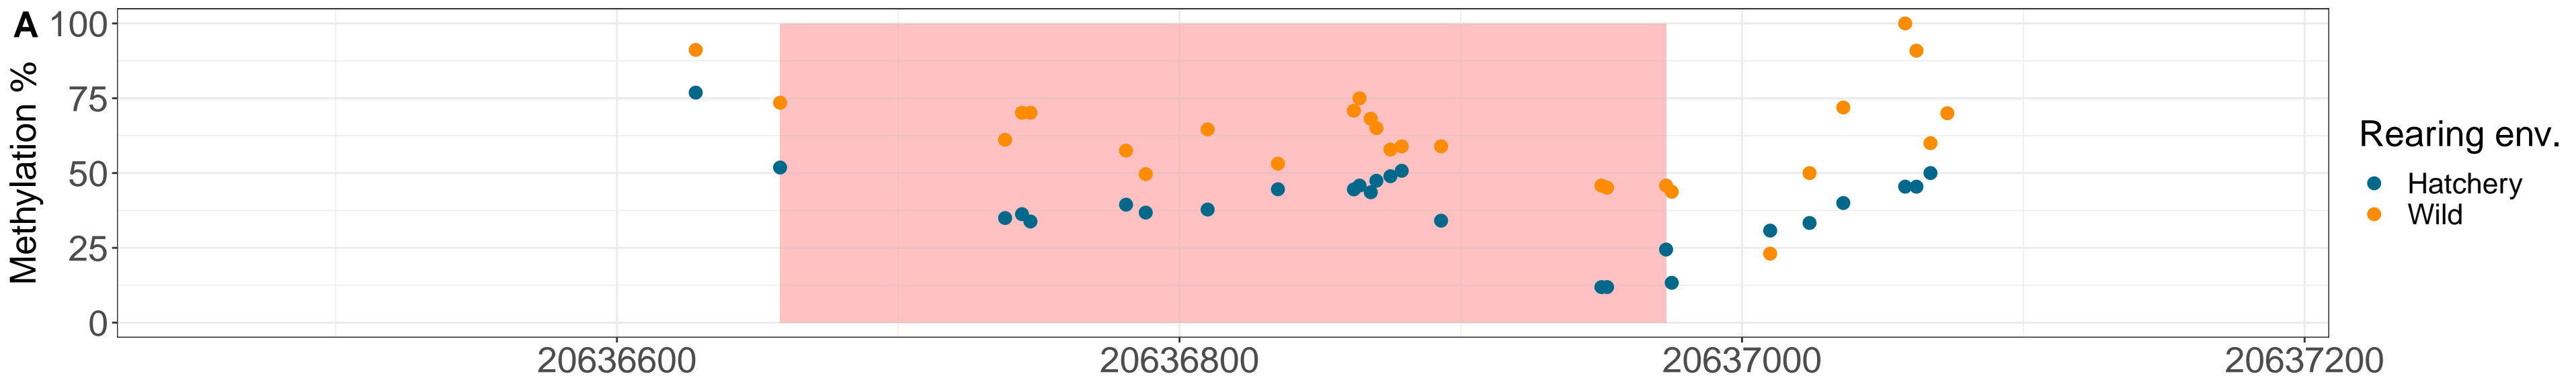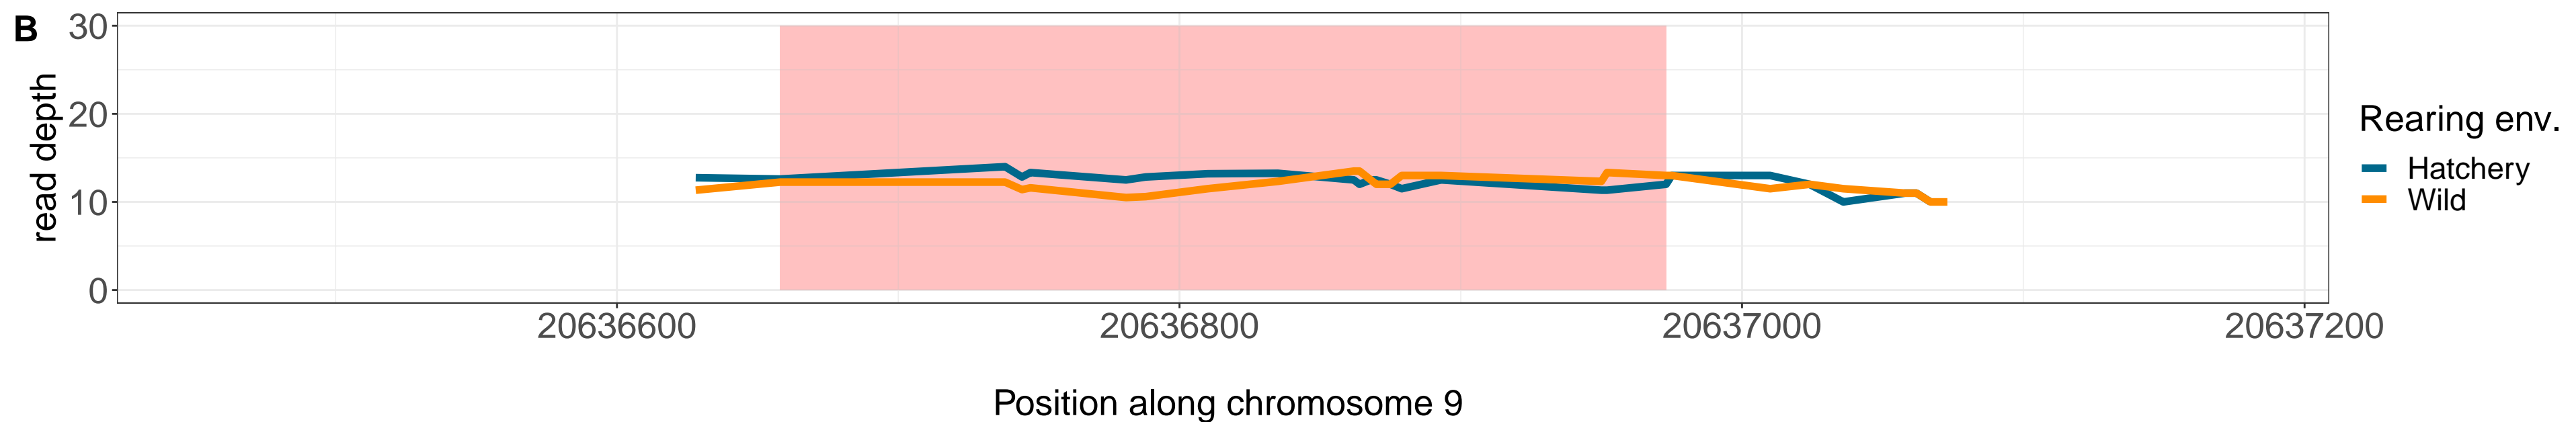

Position along chromosome 9

# DMR\_129

XM\_020462712.1

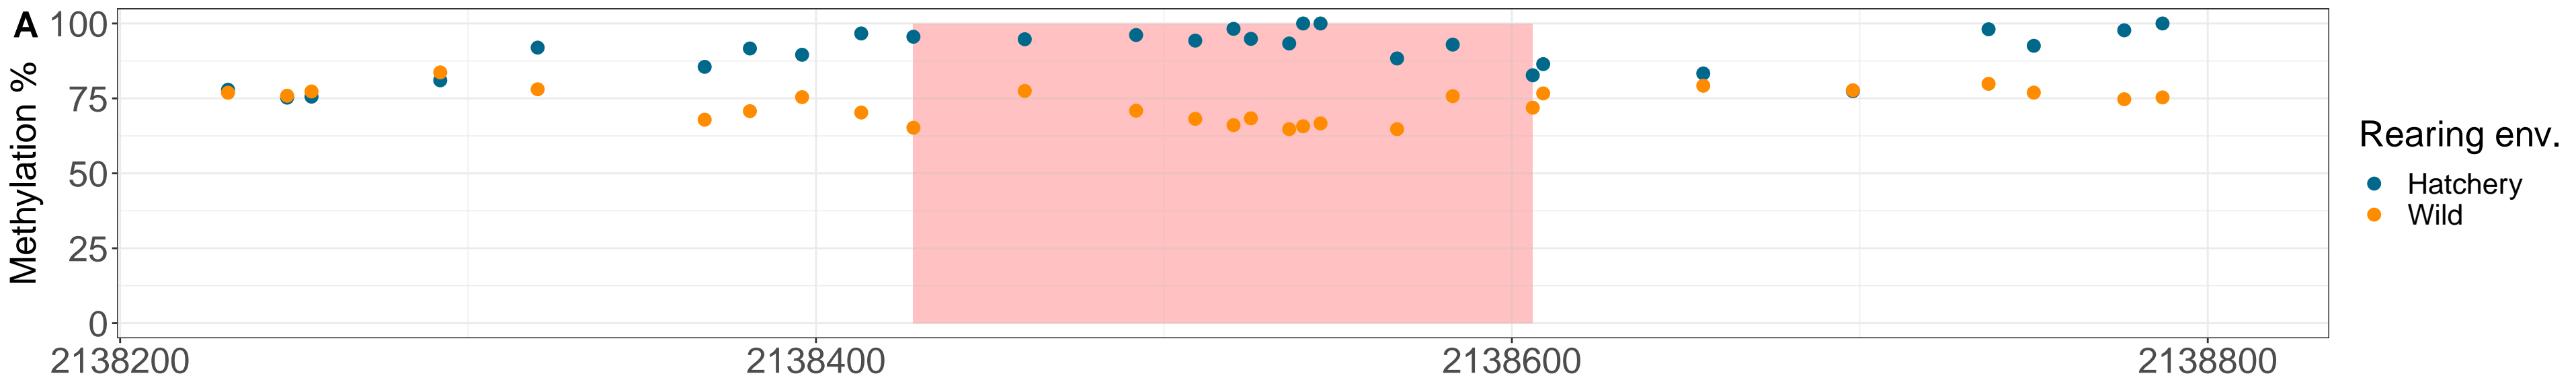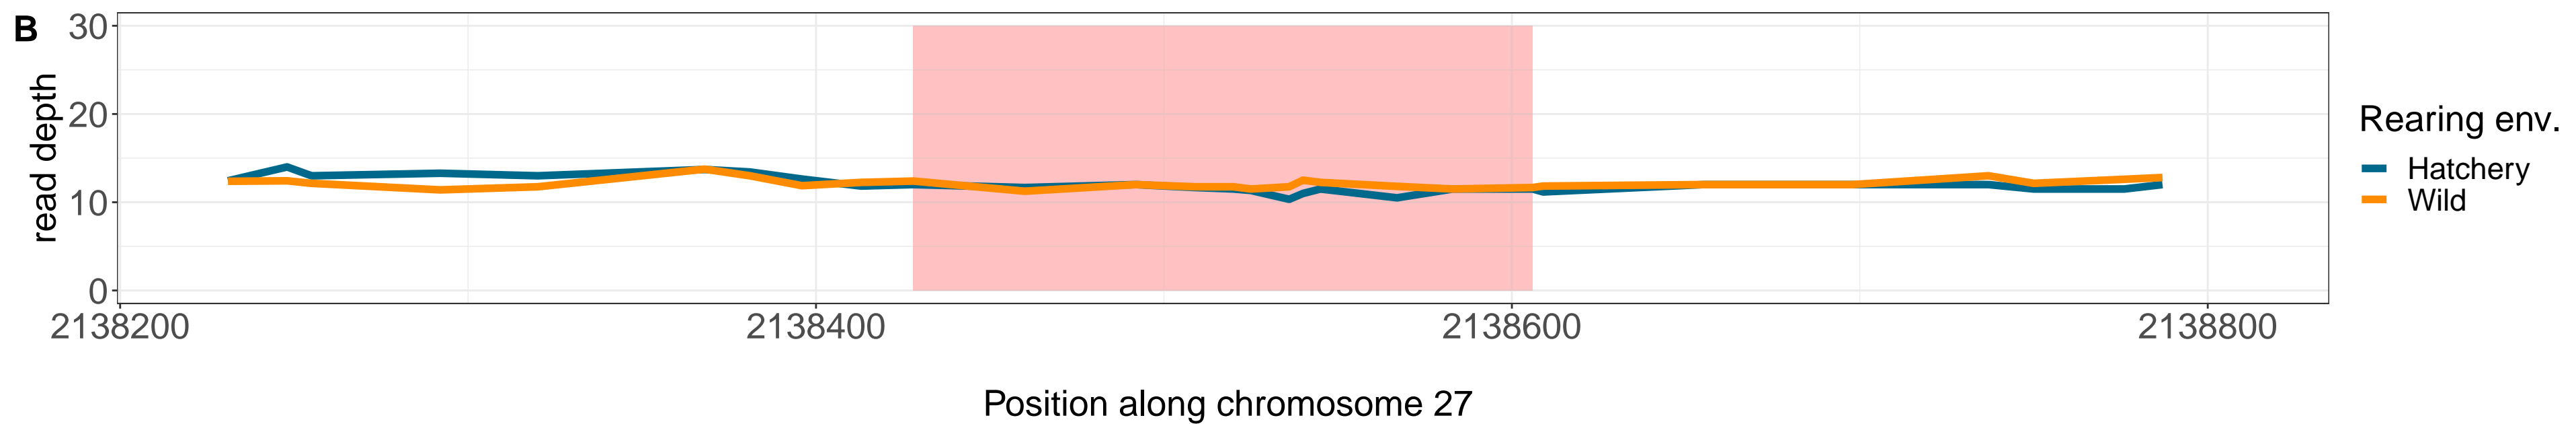



**A**

## DMR\_130

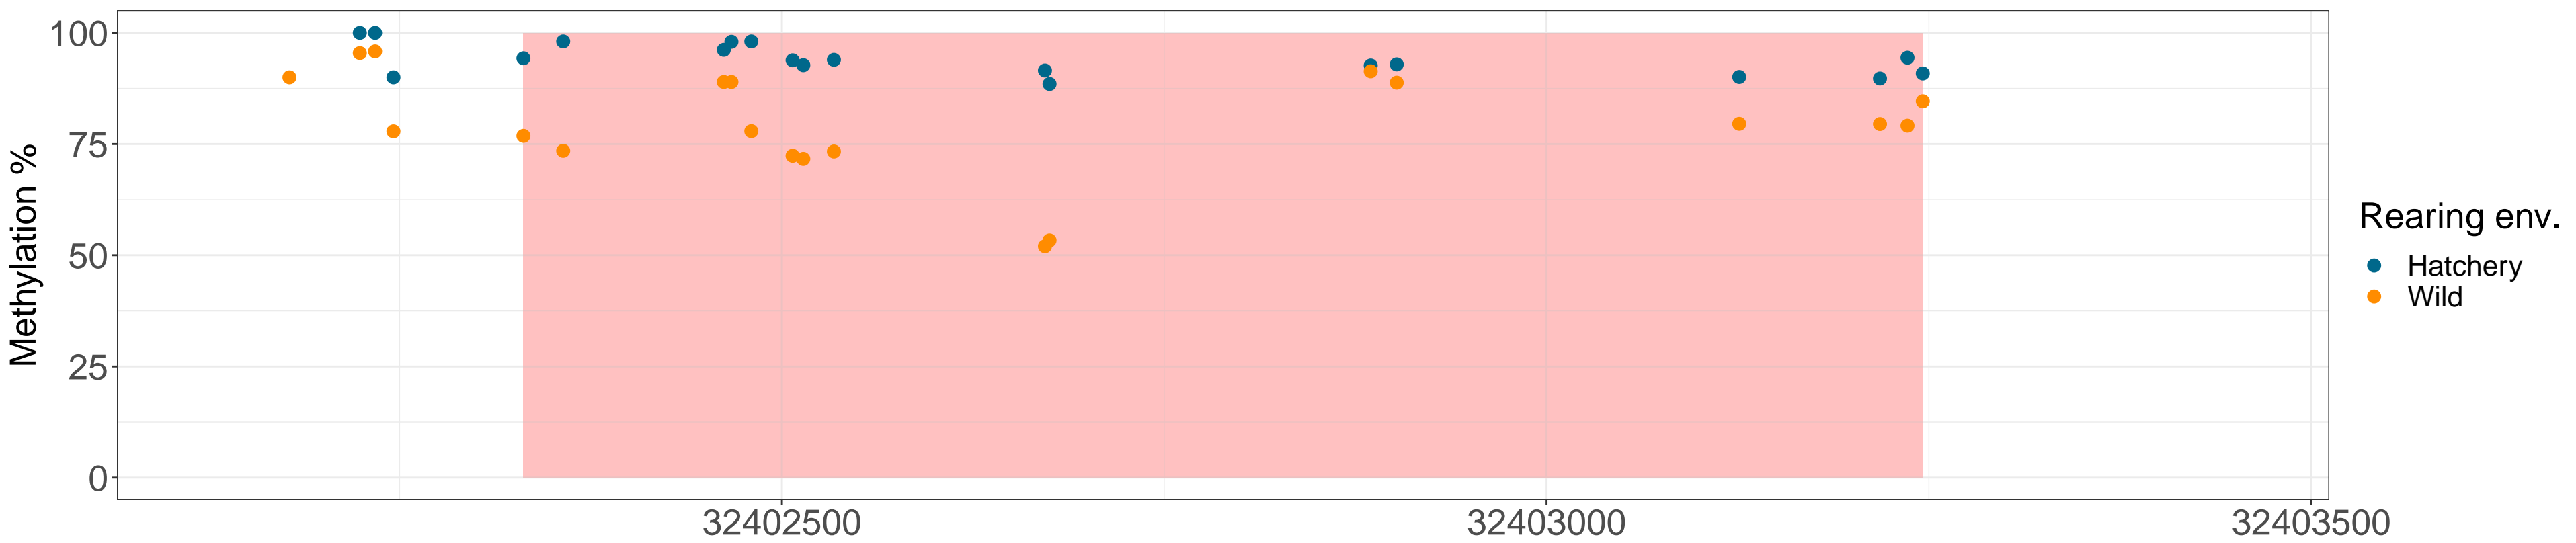**B**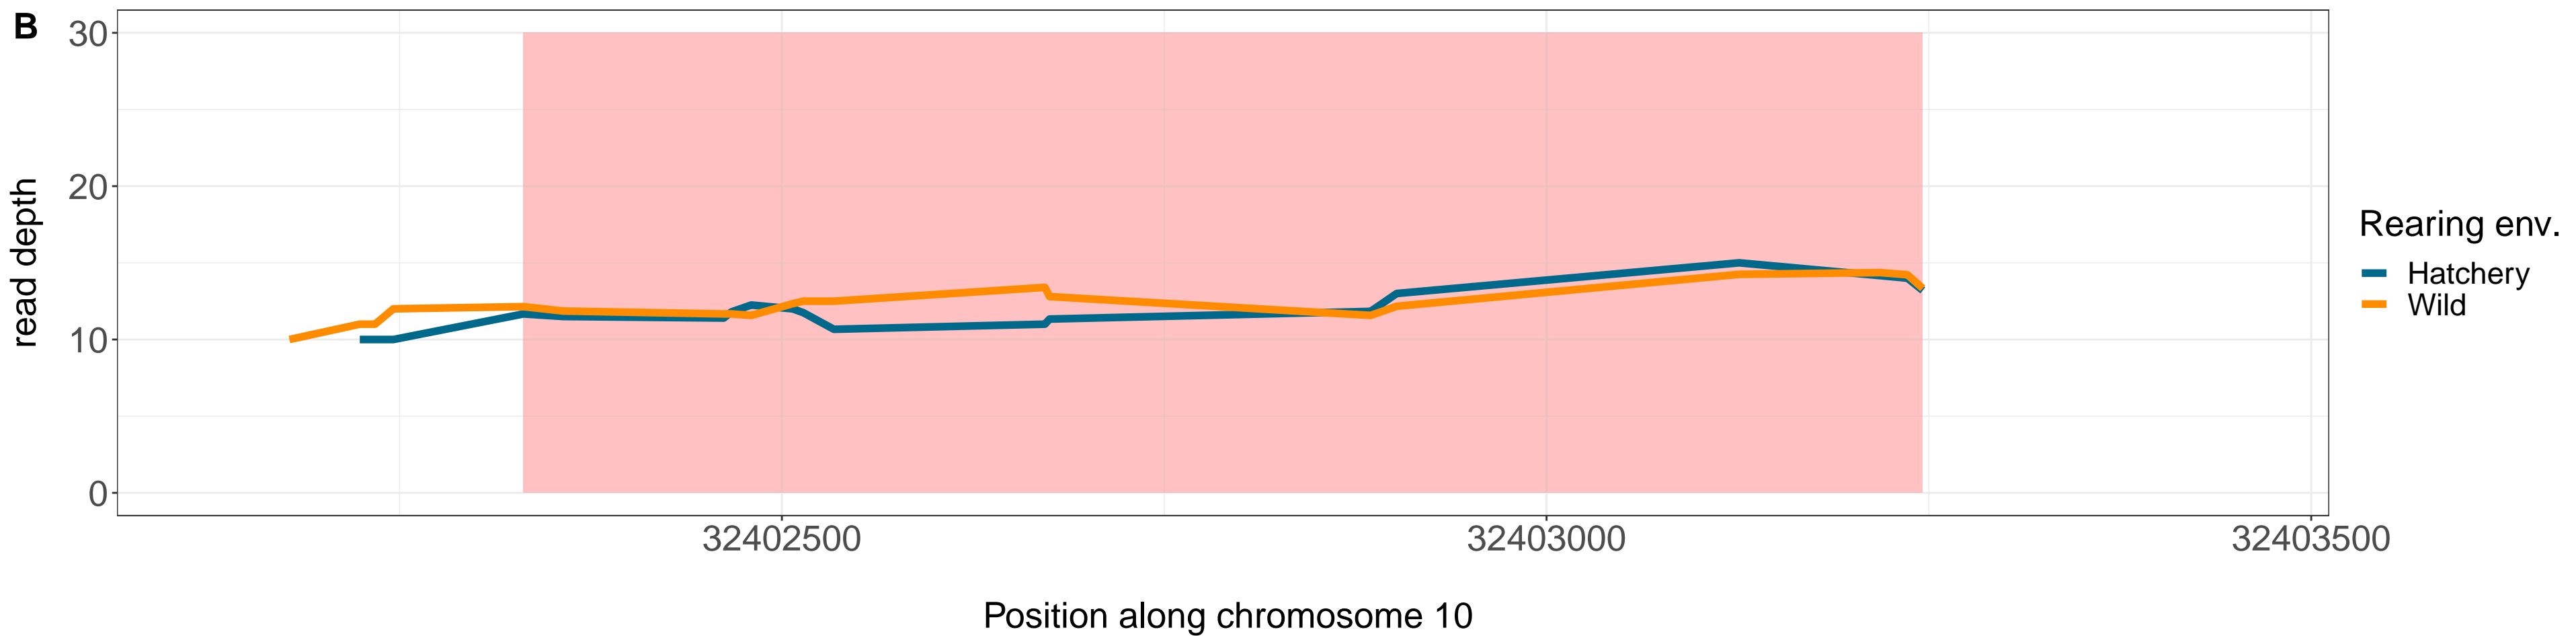

**A****DMR\_131**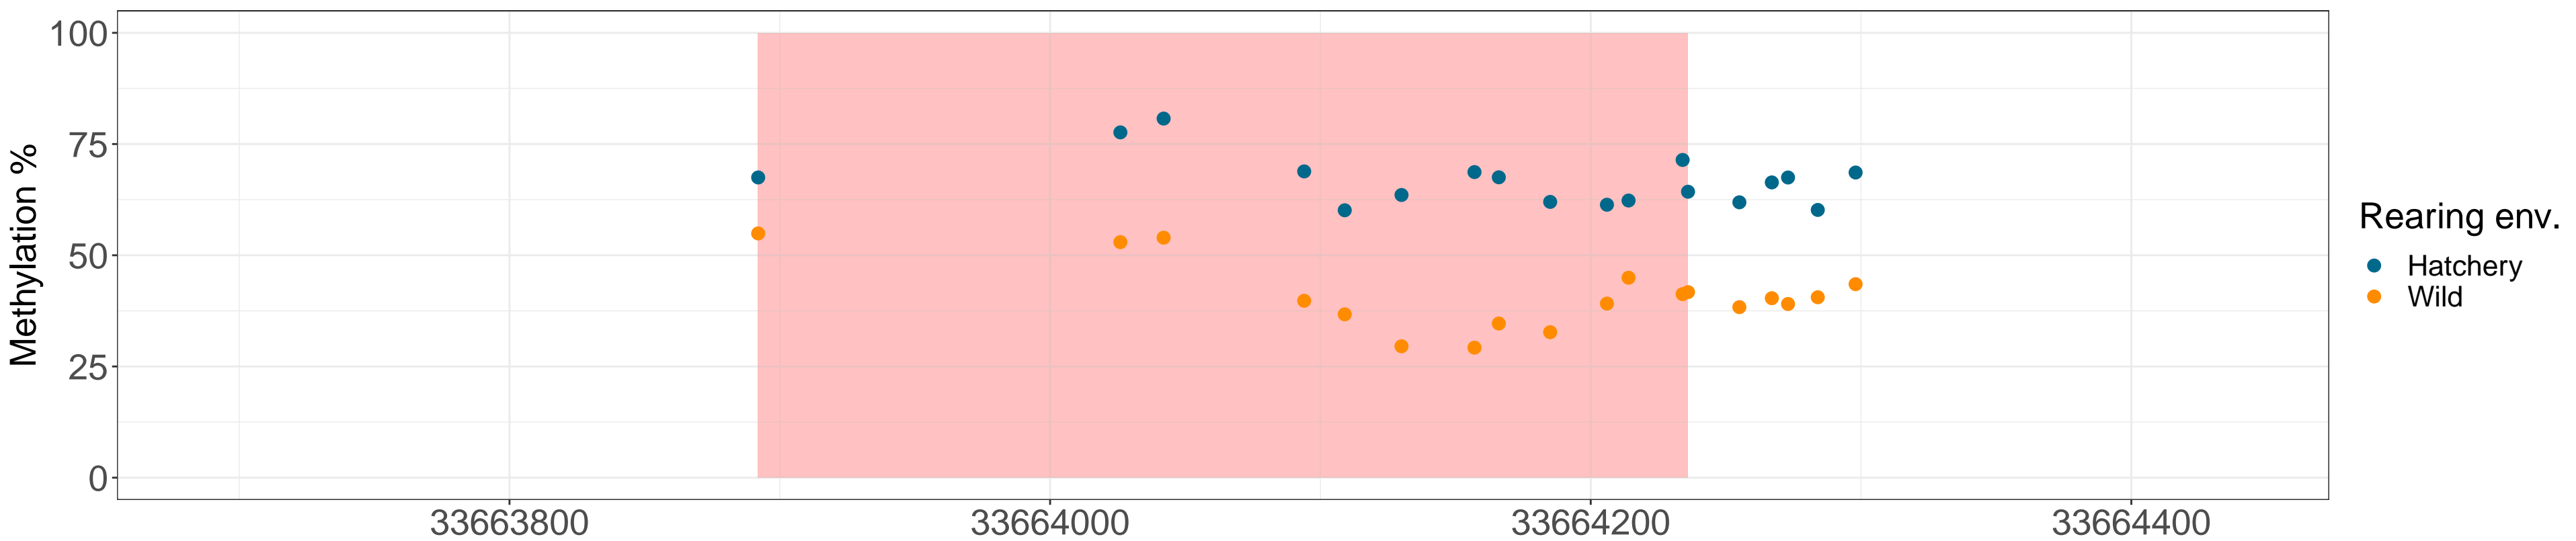**B**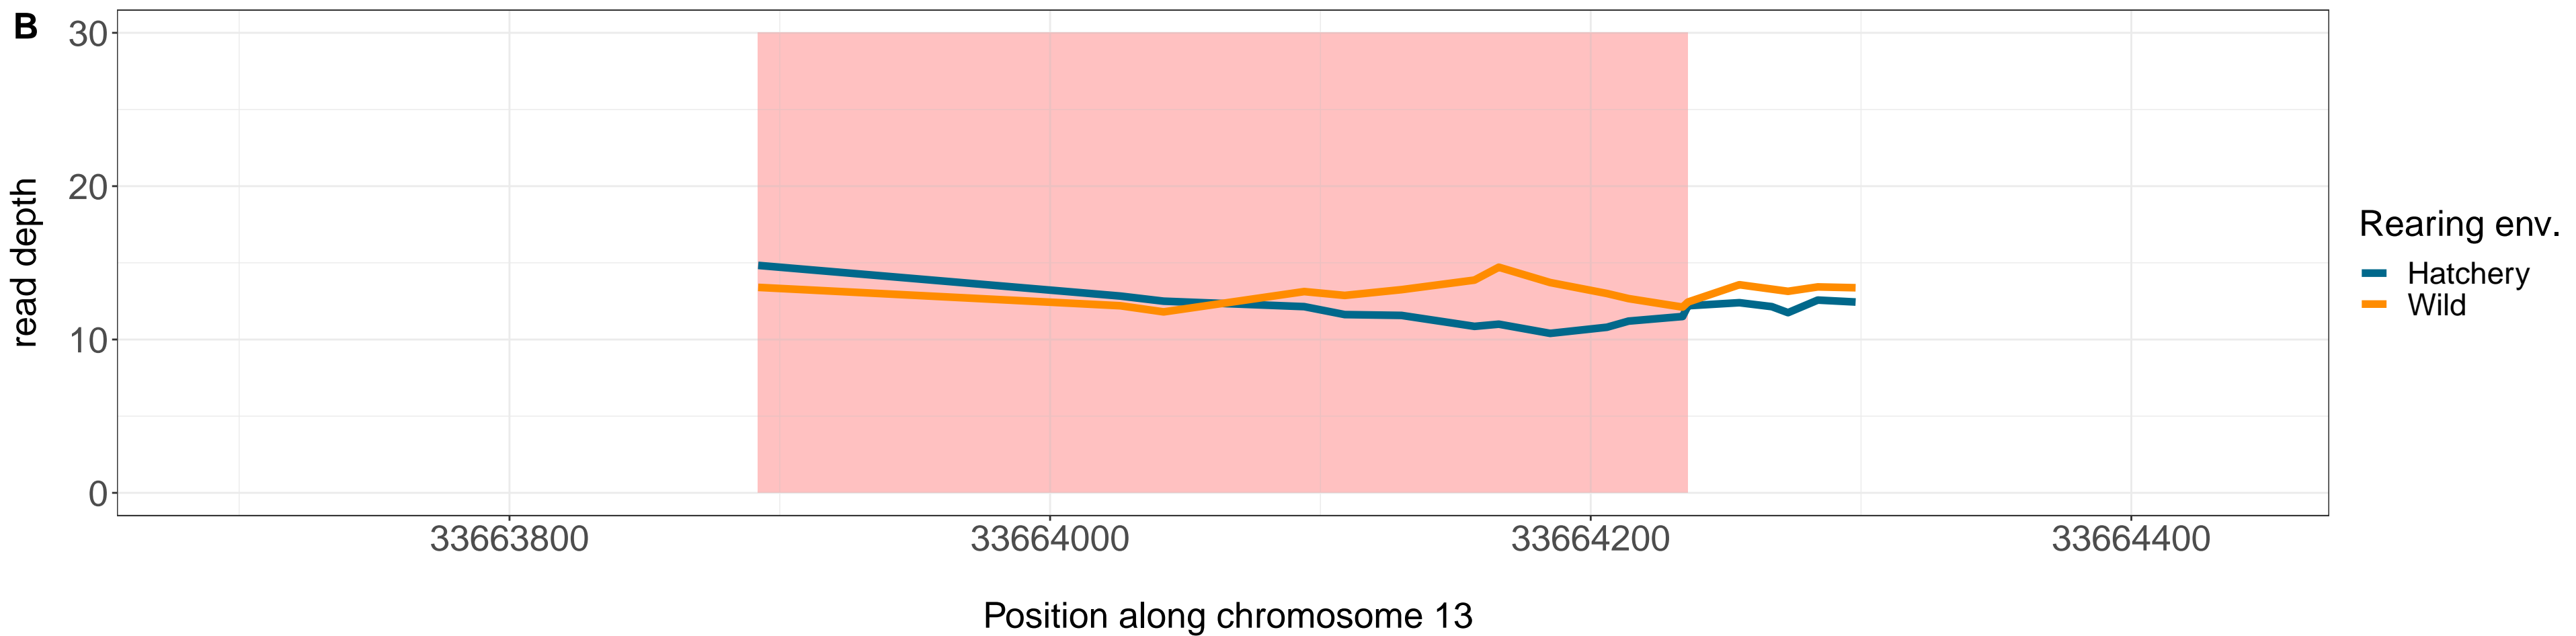

# DMR\_133

XM\_020498586.1

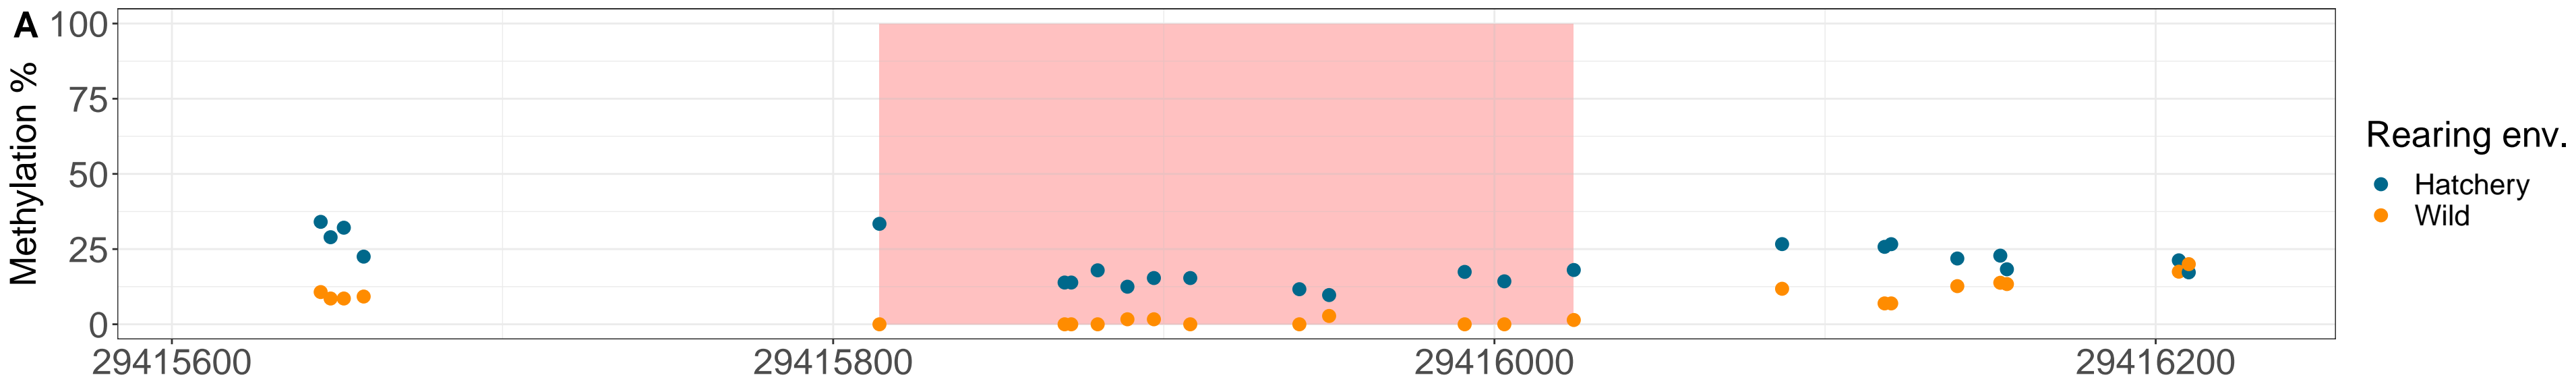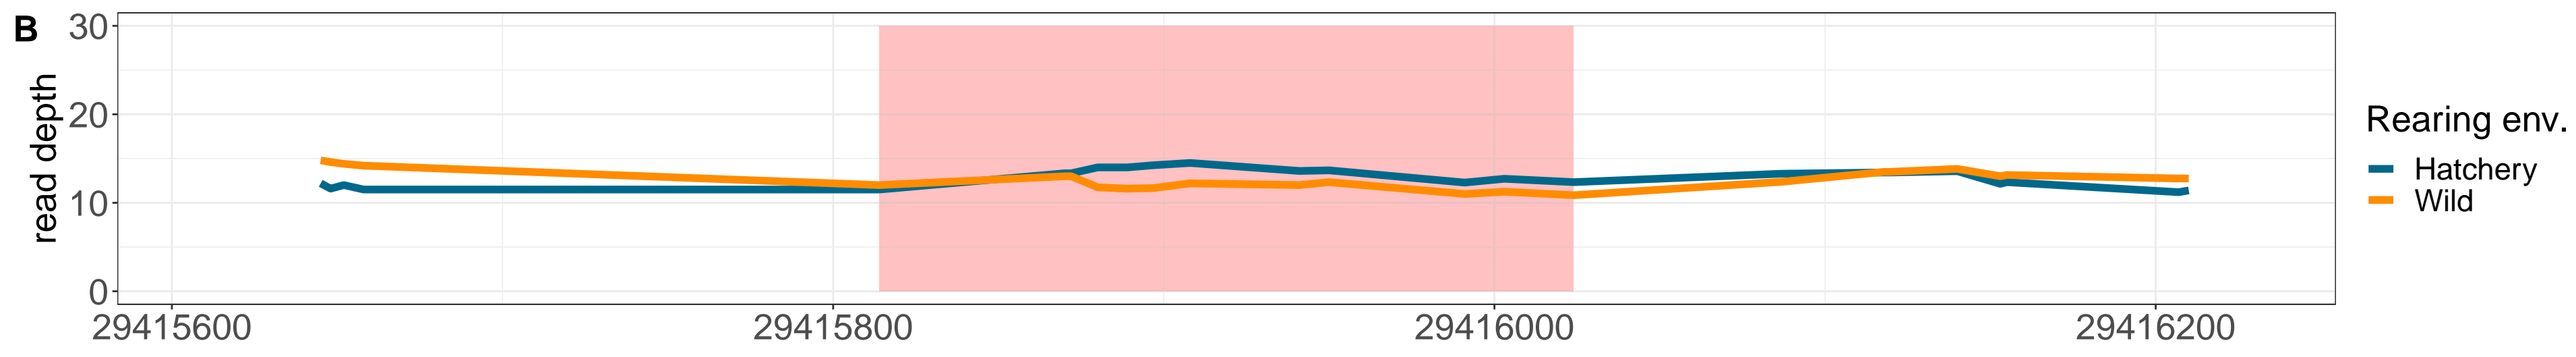

Position along chromosome 13

**A****DMR\_134**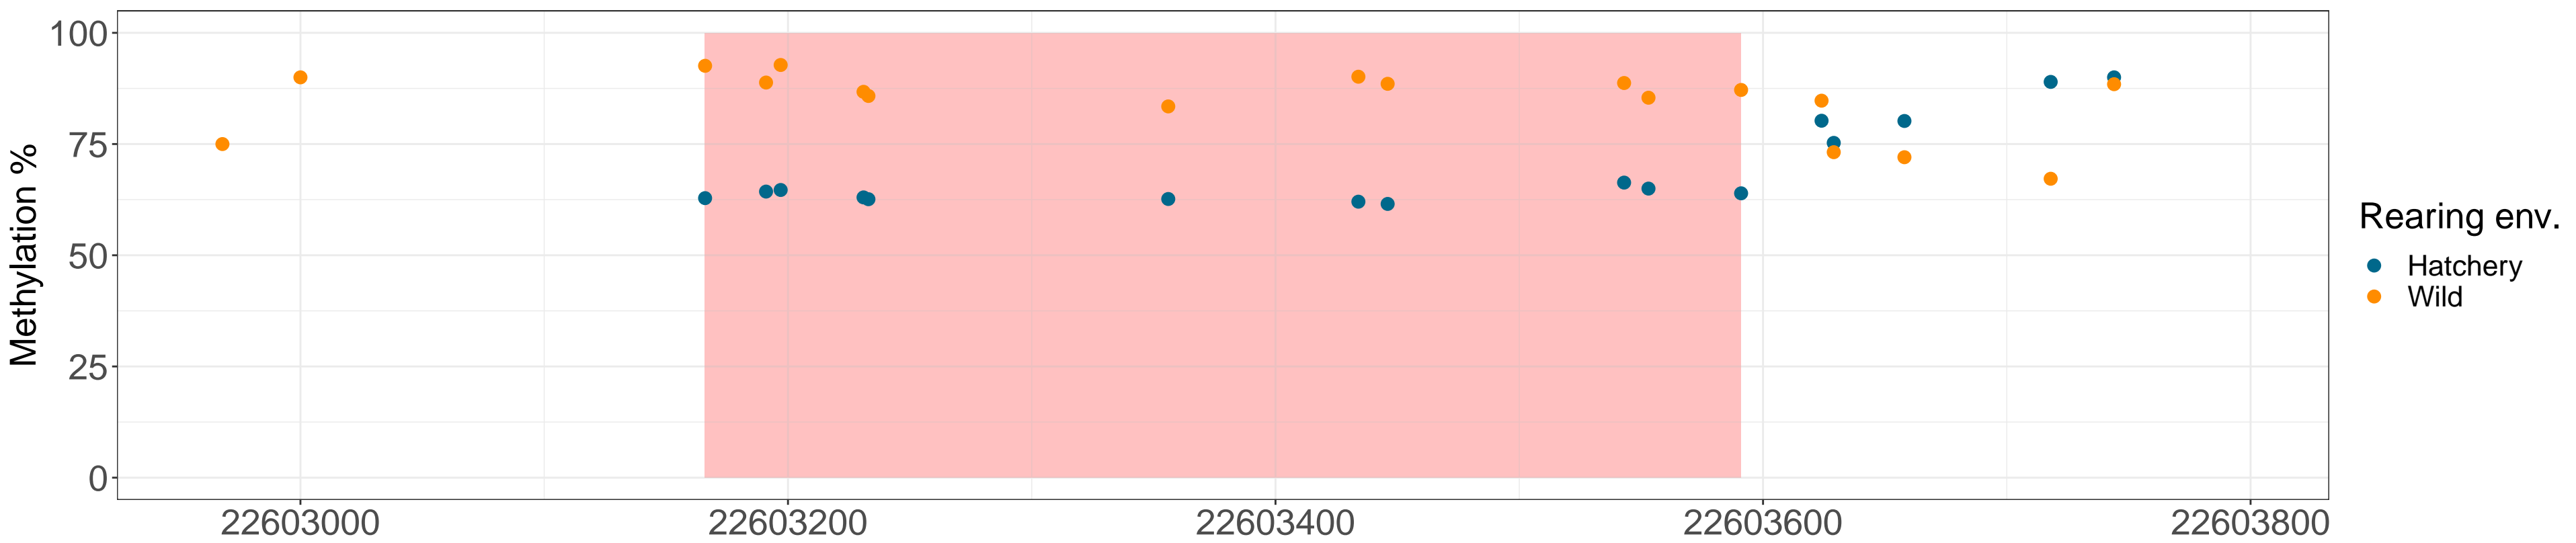**B**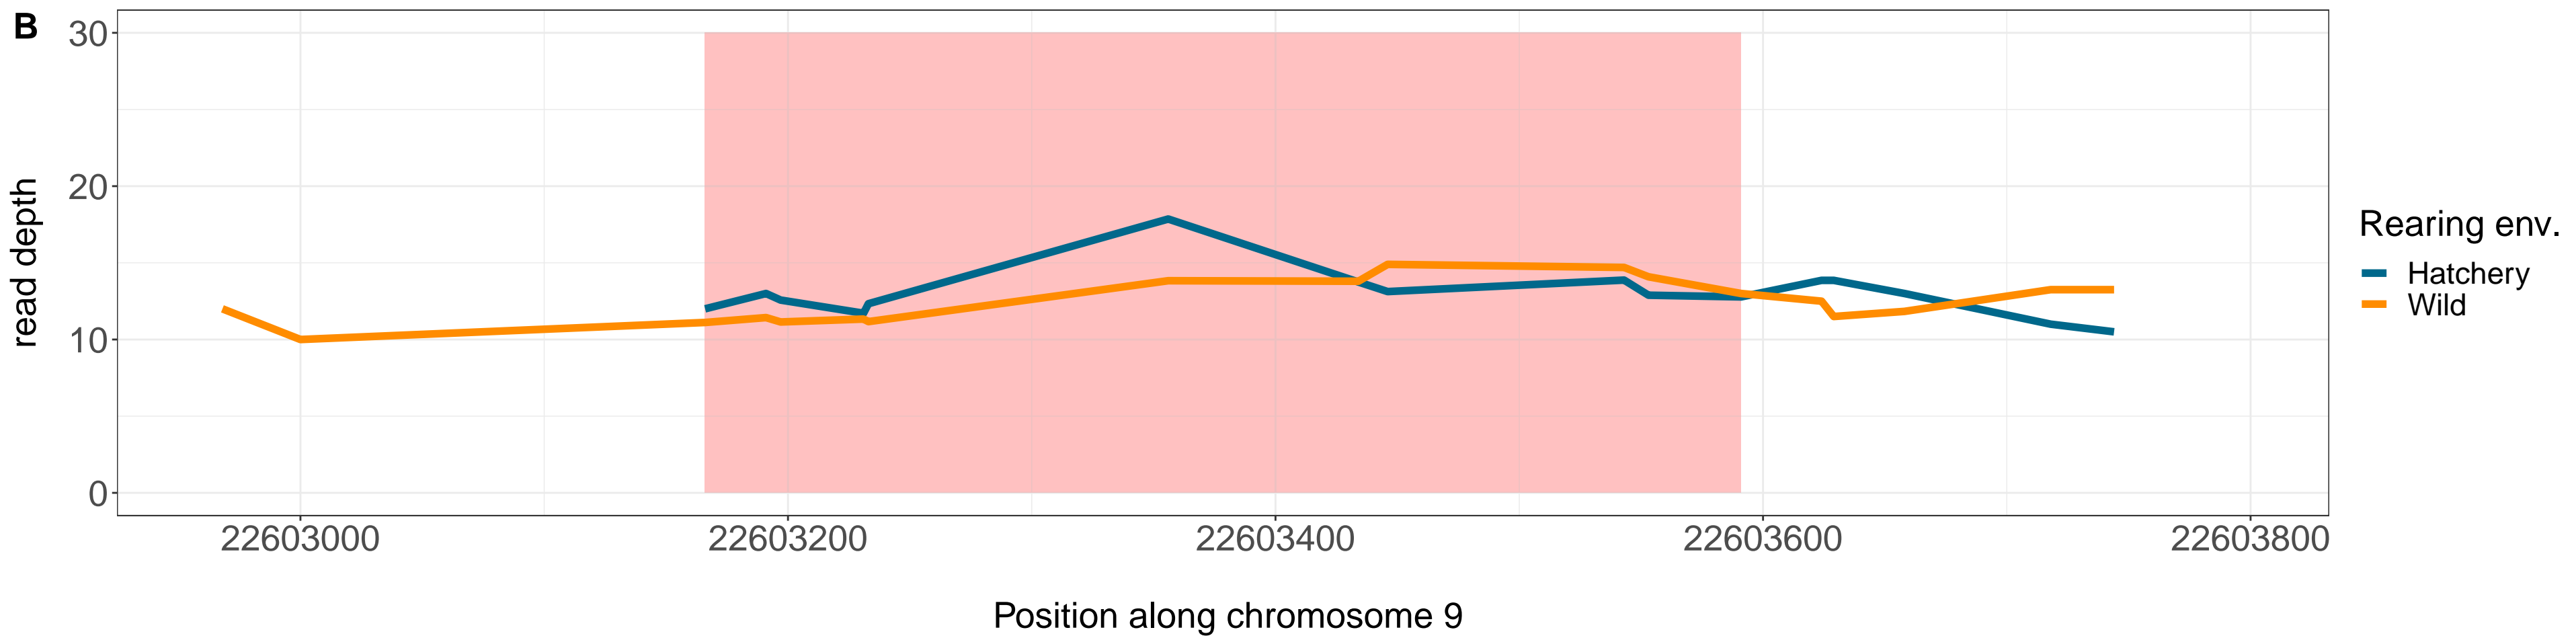

**A**

## DMR\_136

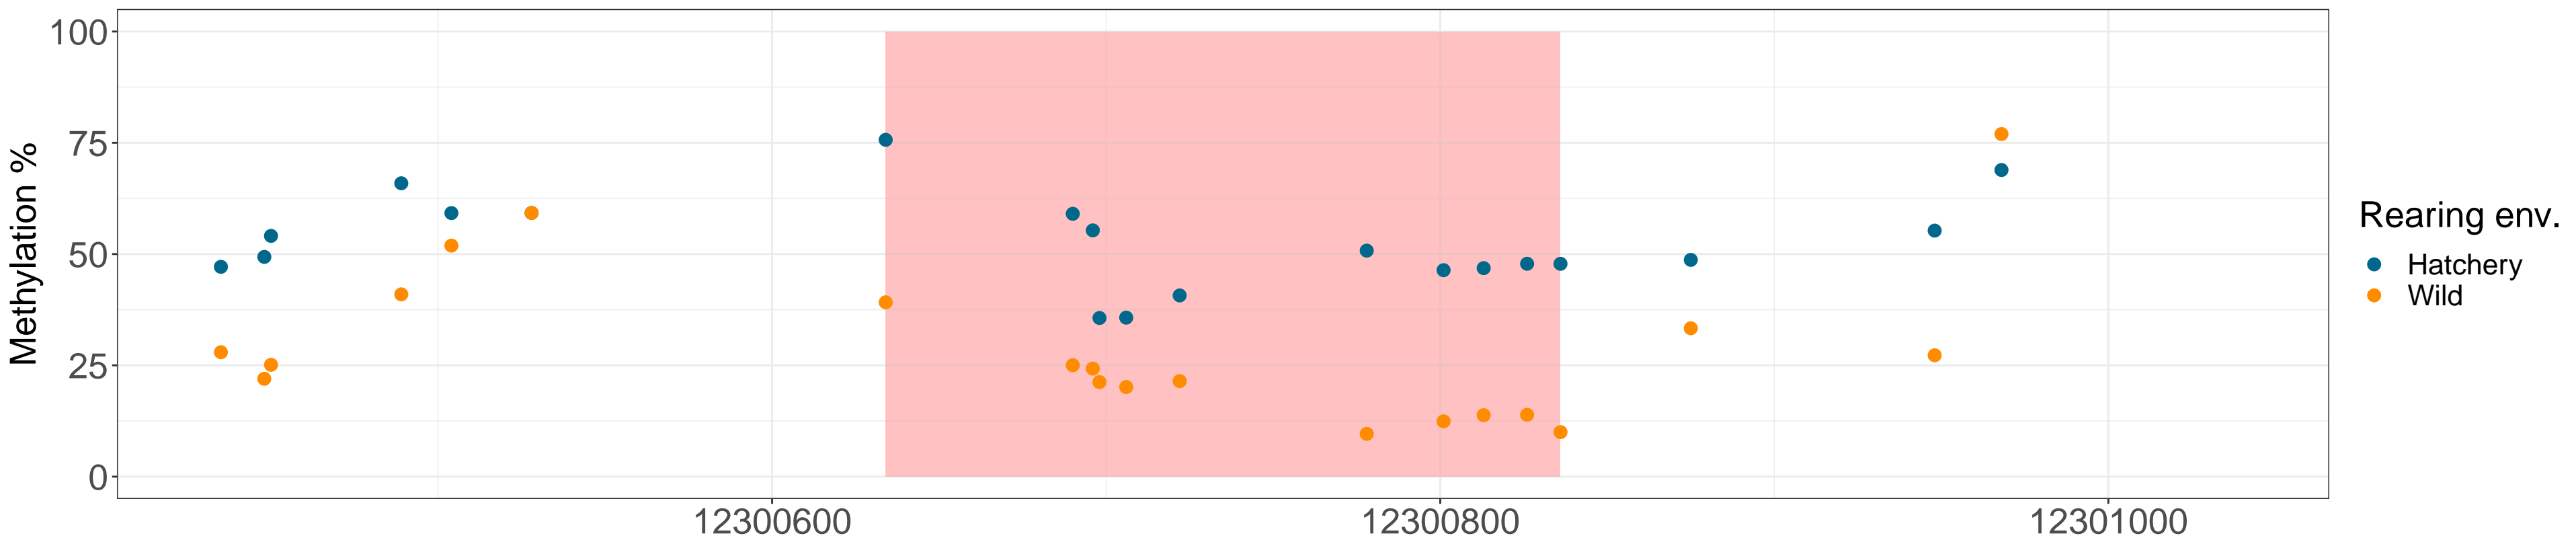**B**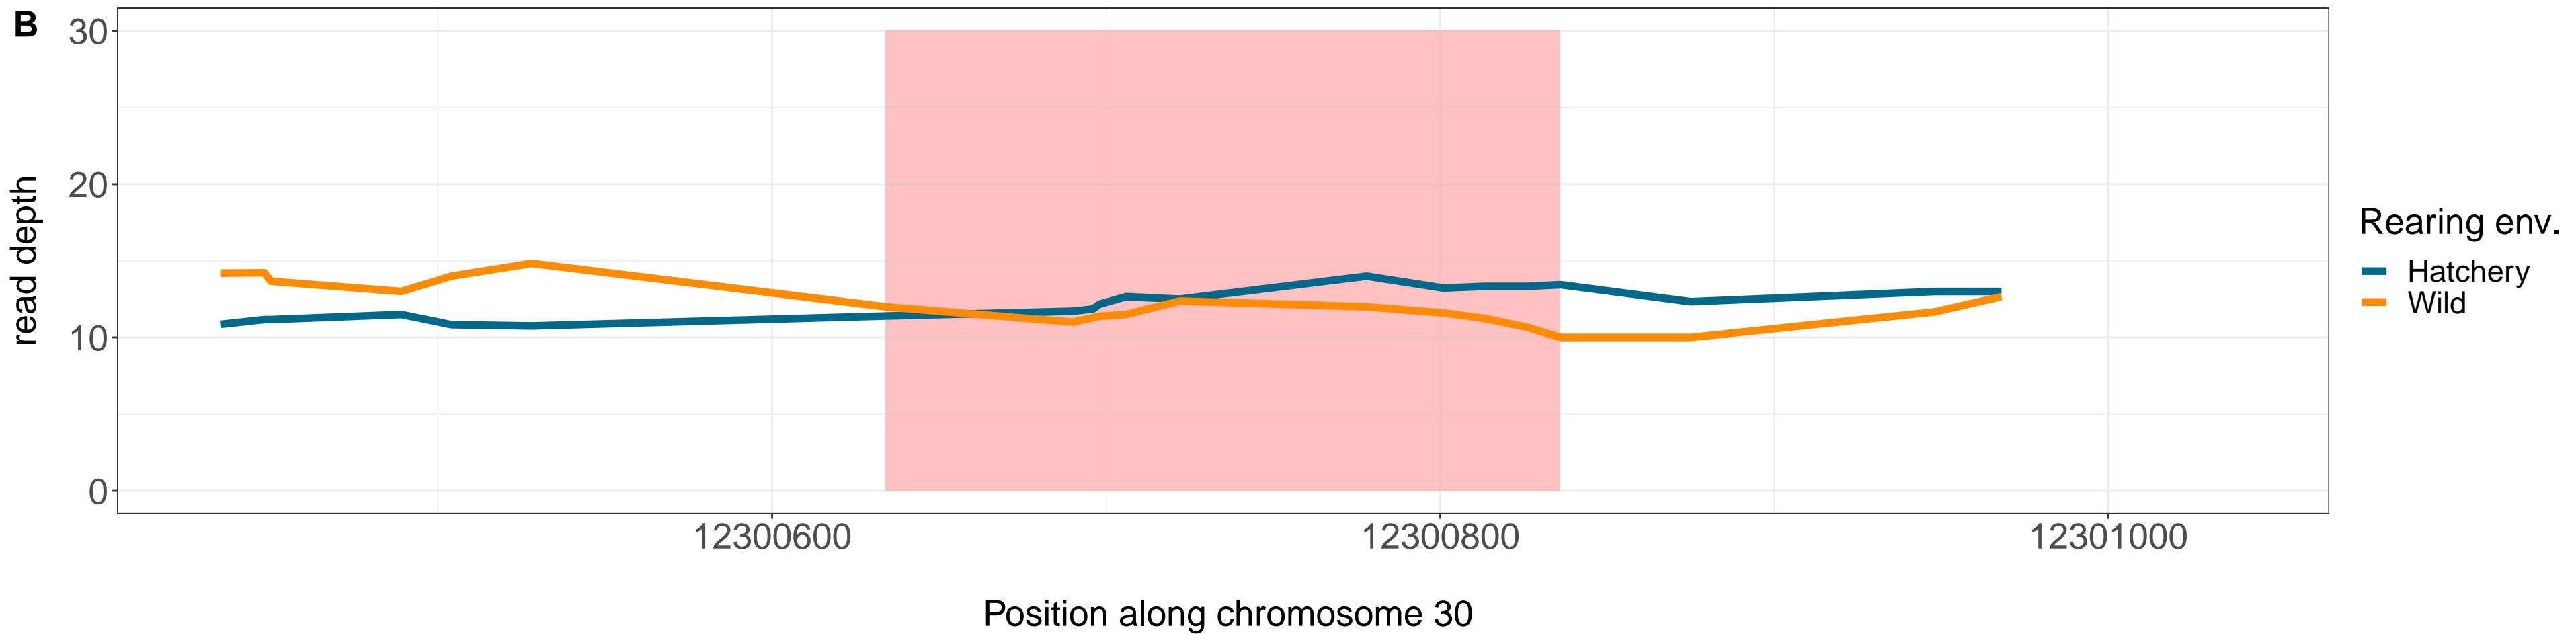

**A**

## DMR\_137

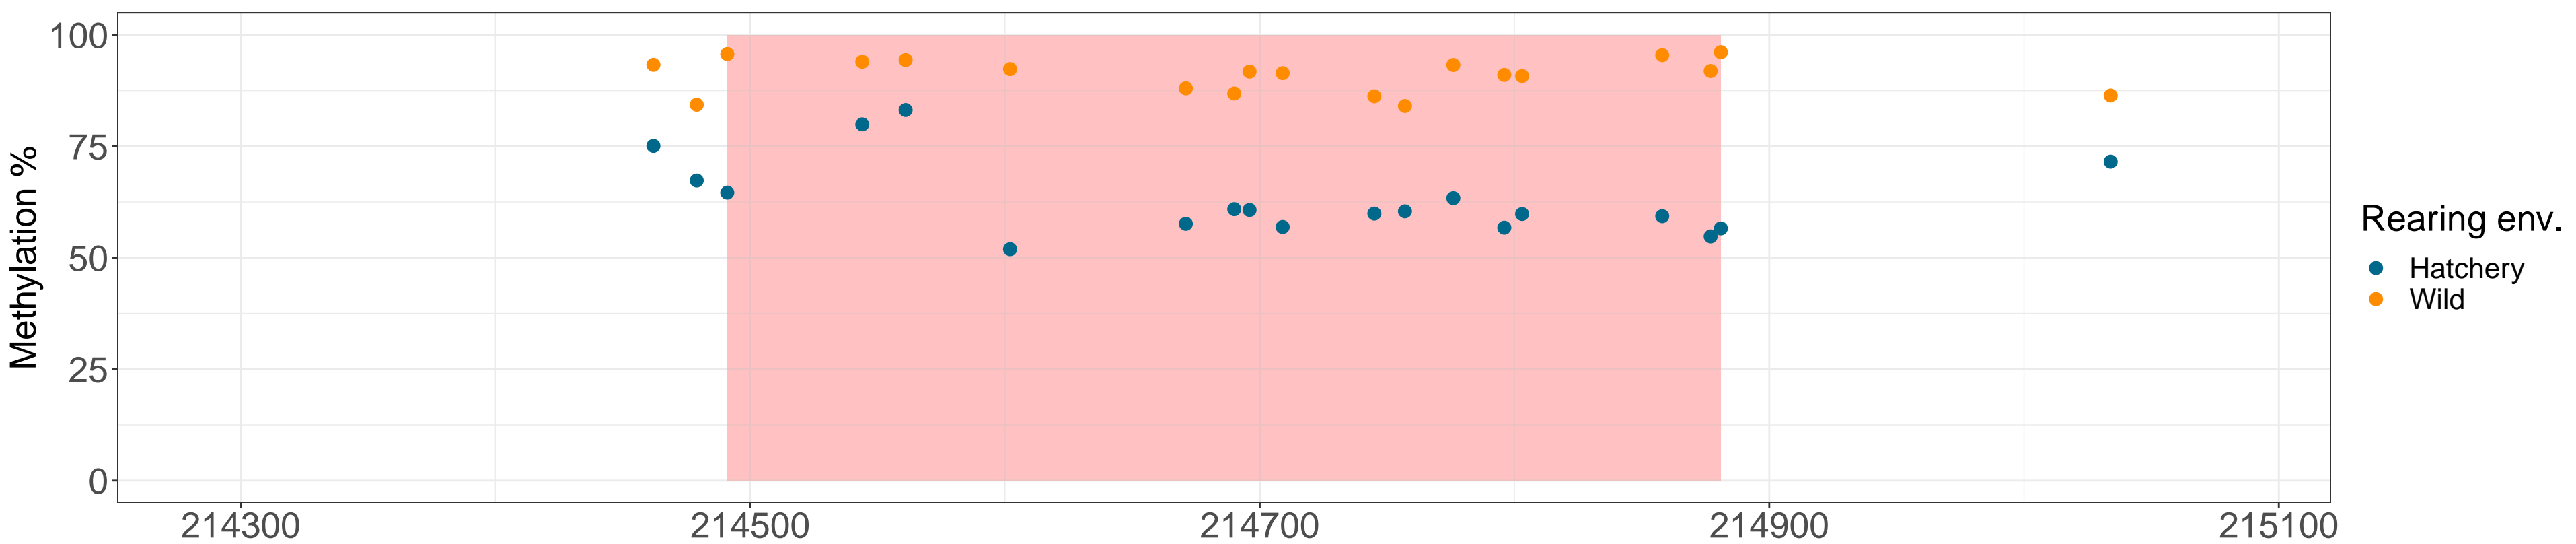**B**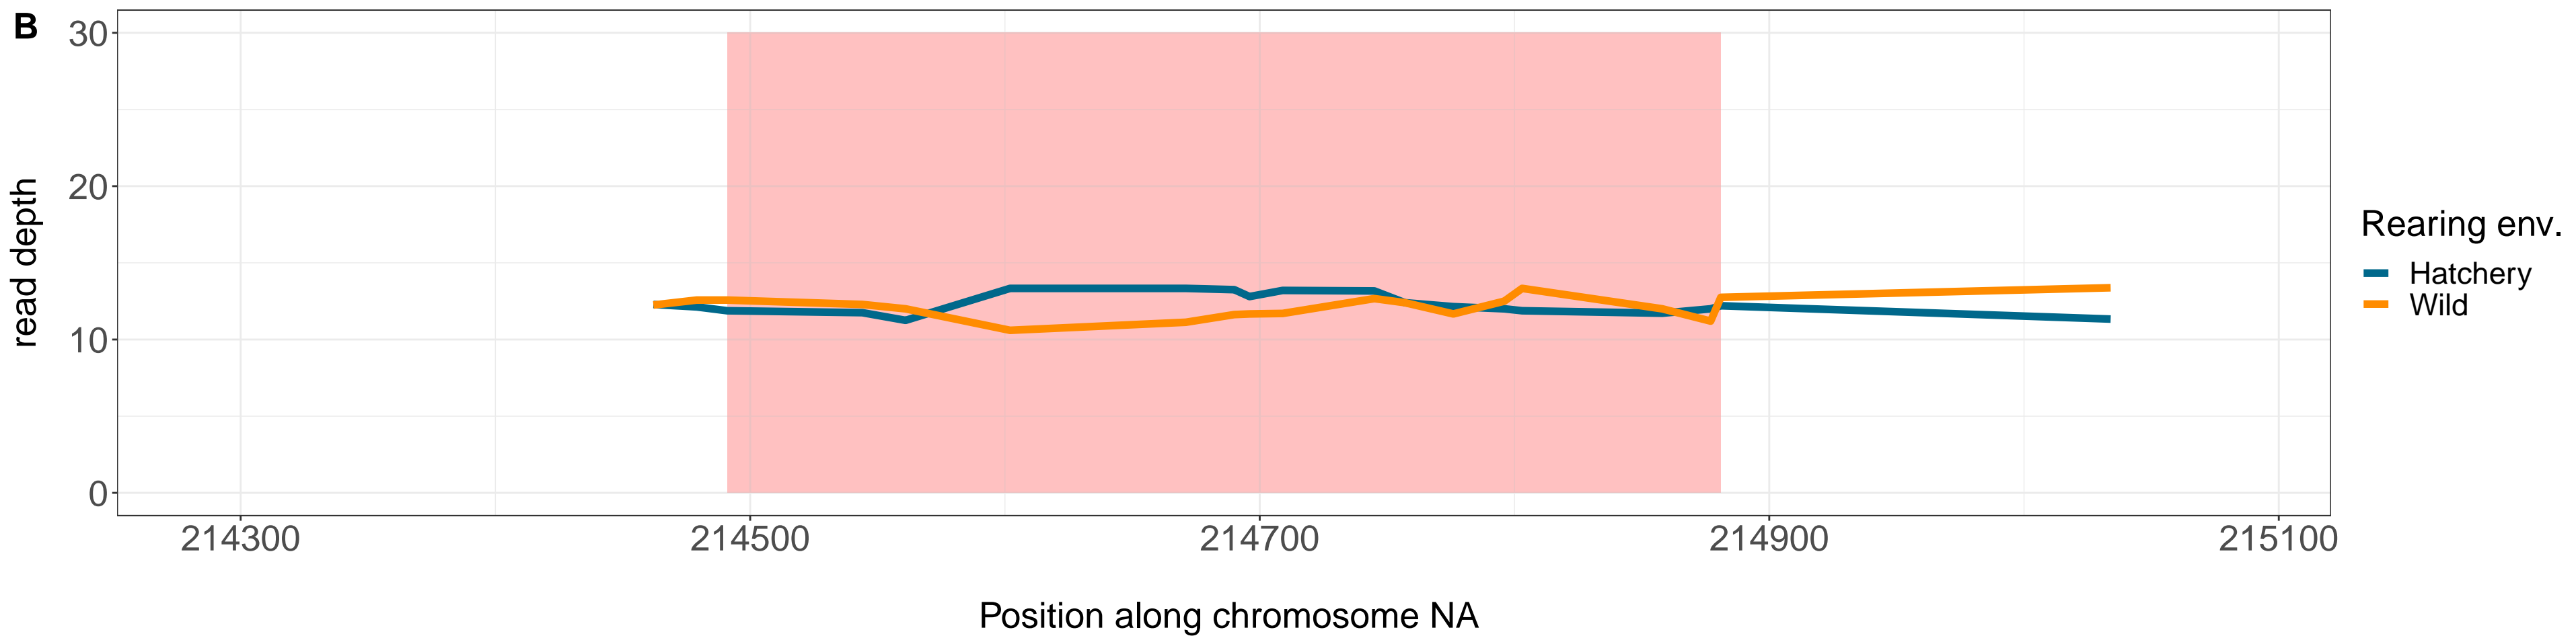

**A****DMR\_139**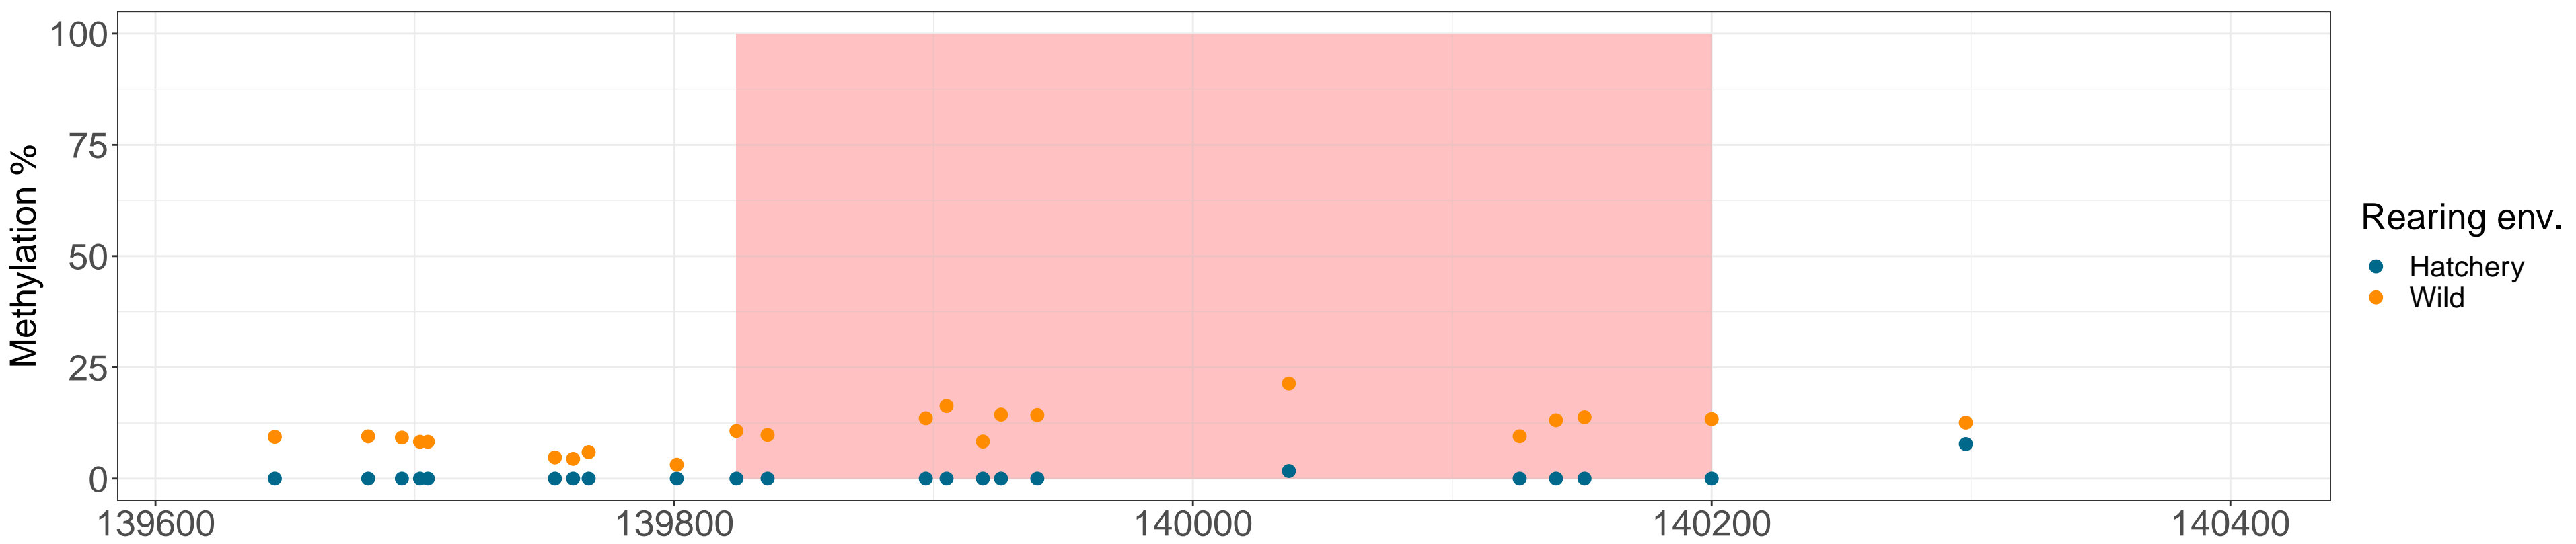**B**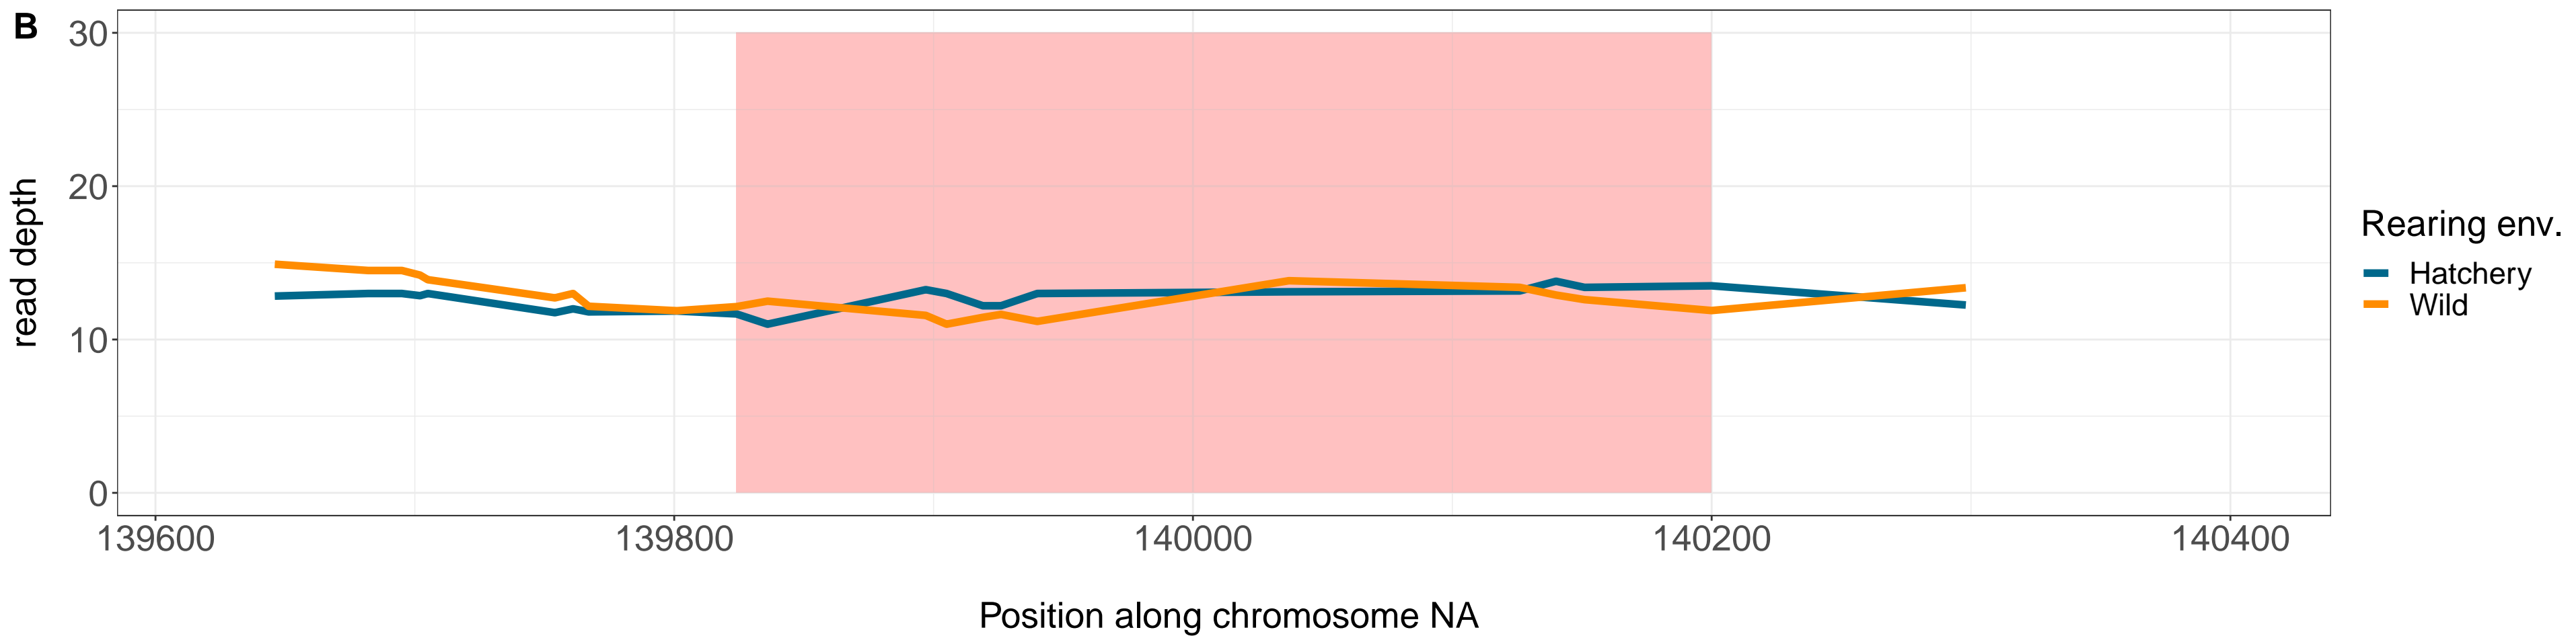

**A****DMR\_140**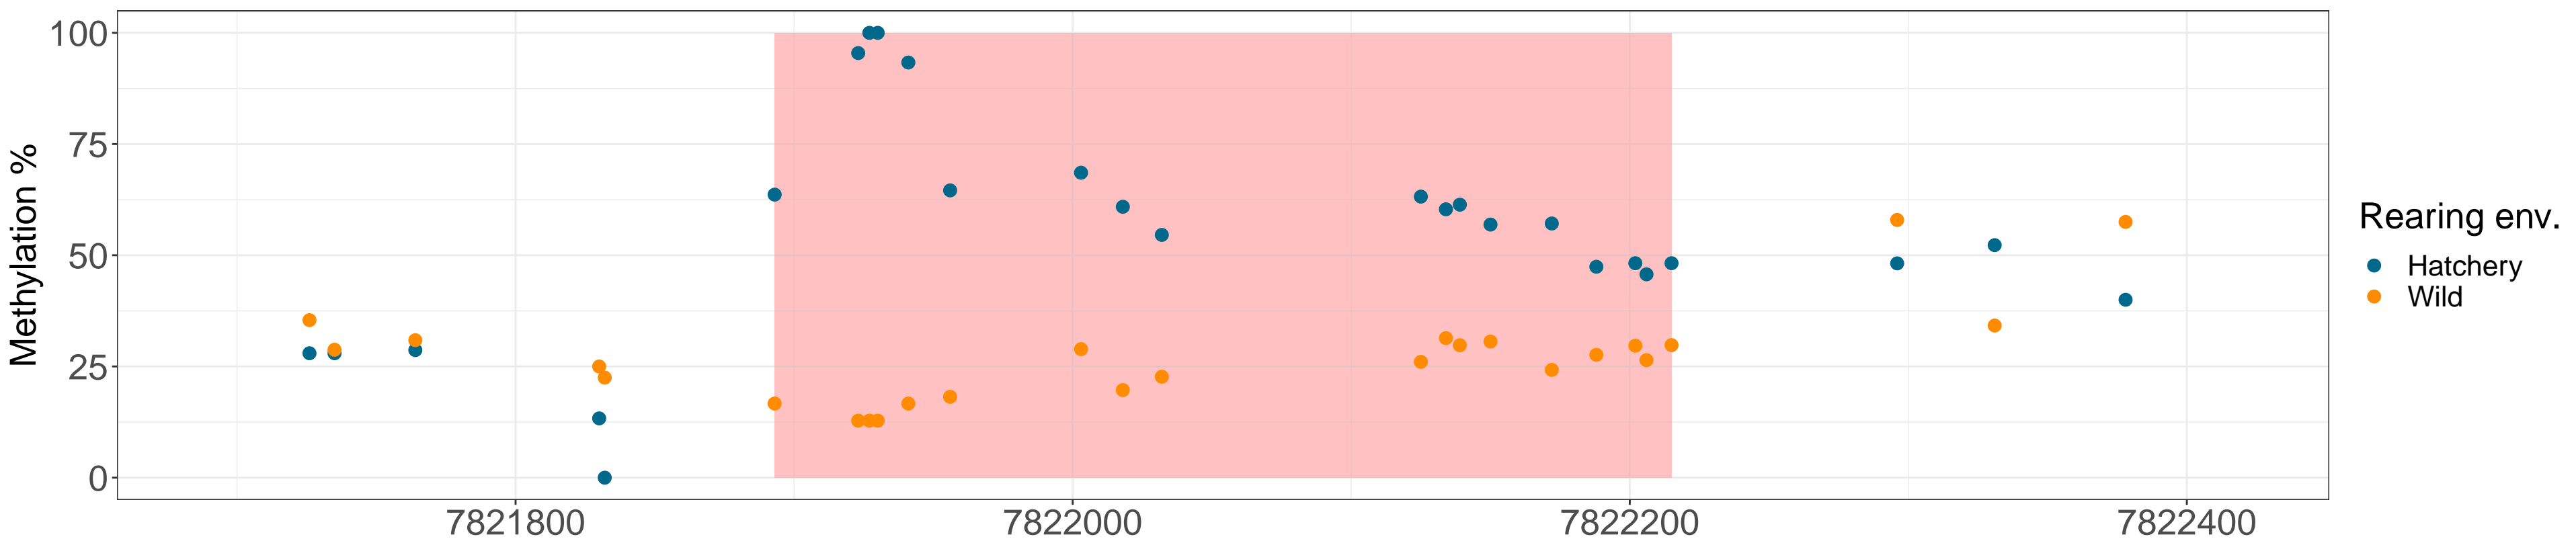**B**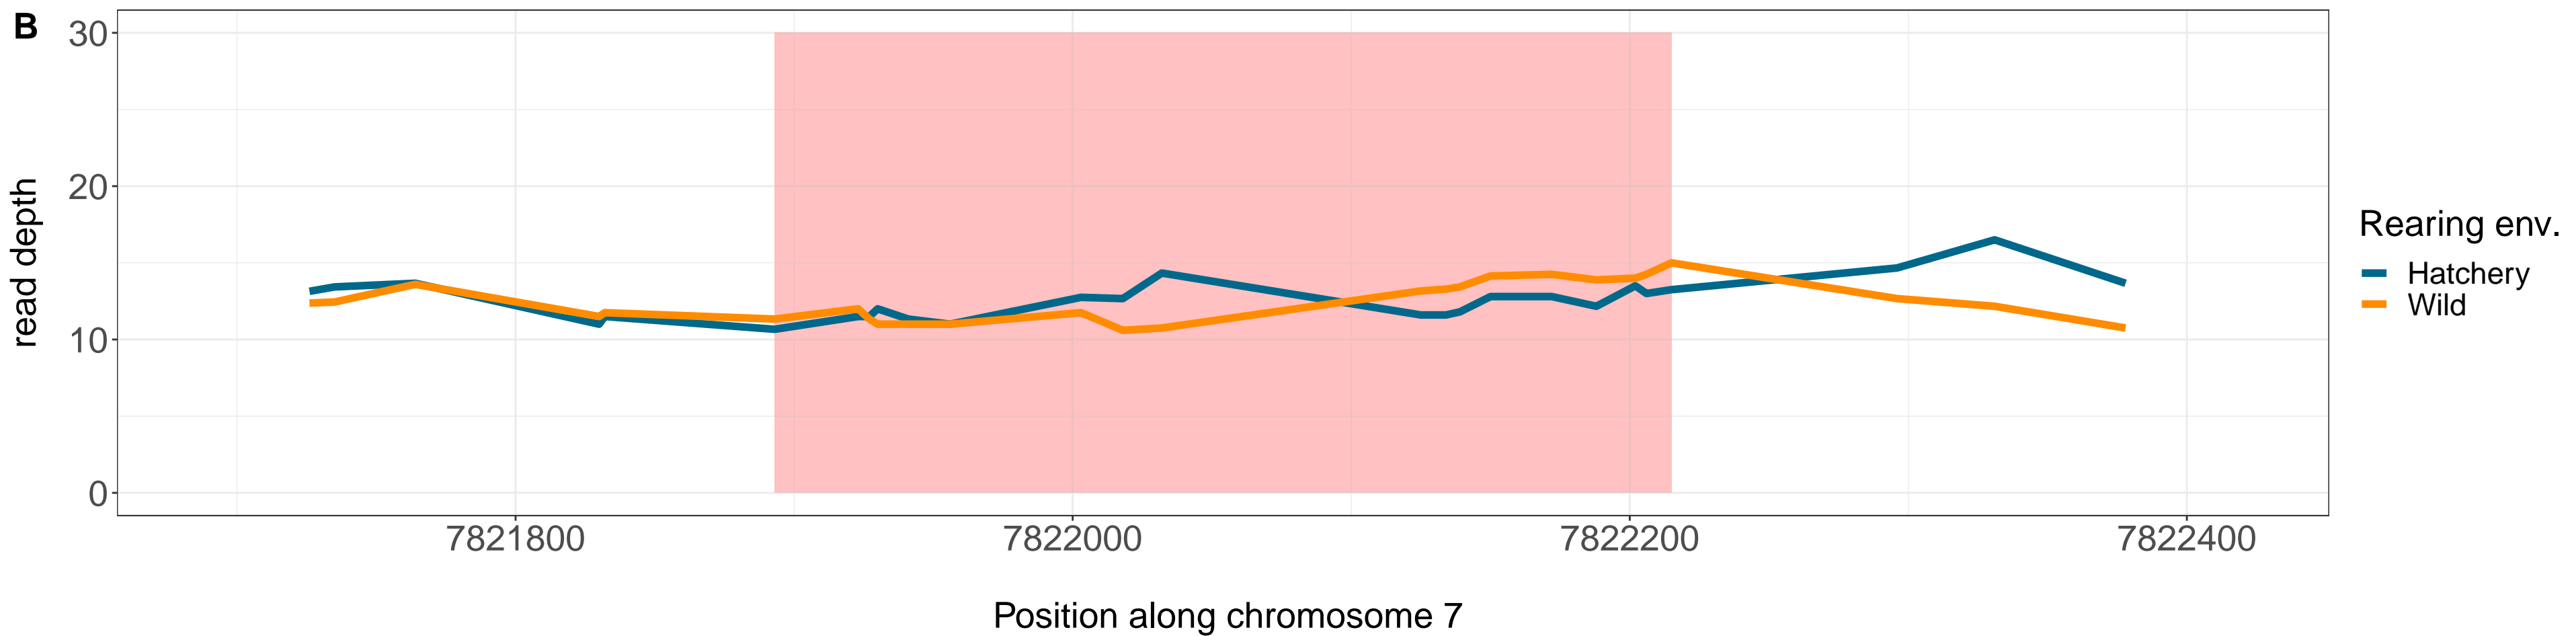



**A**

## DMR\_141

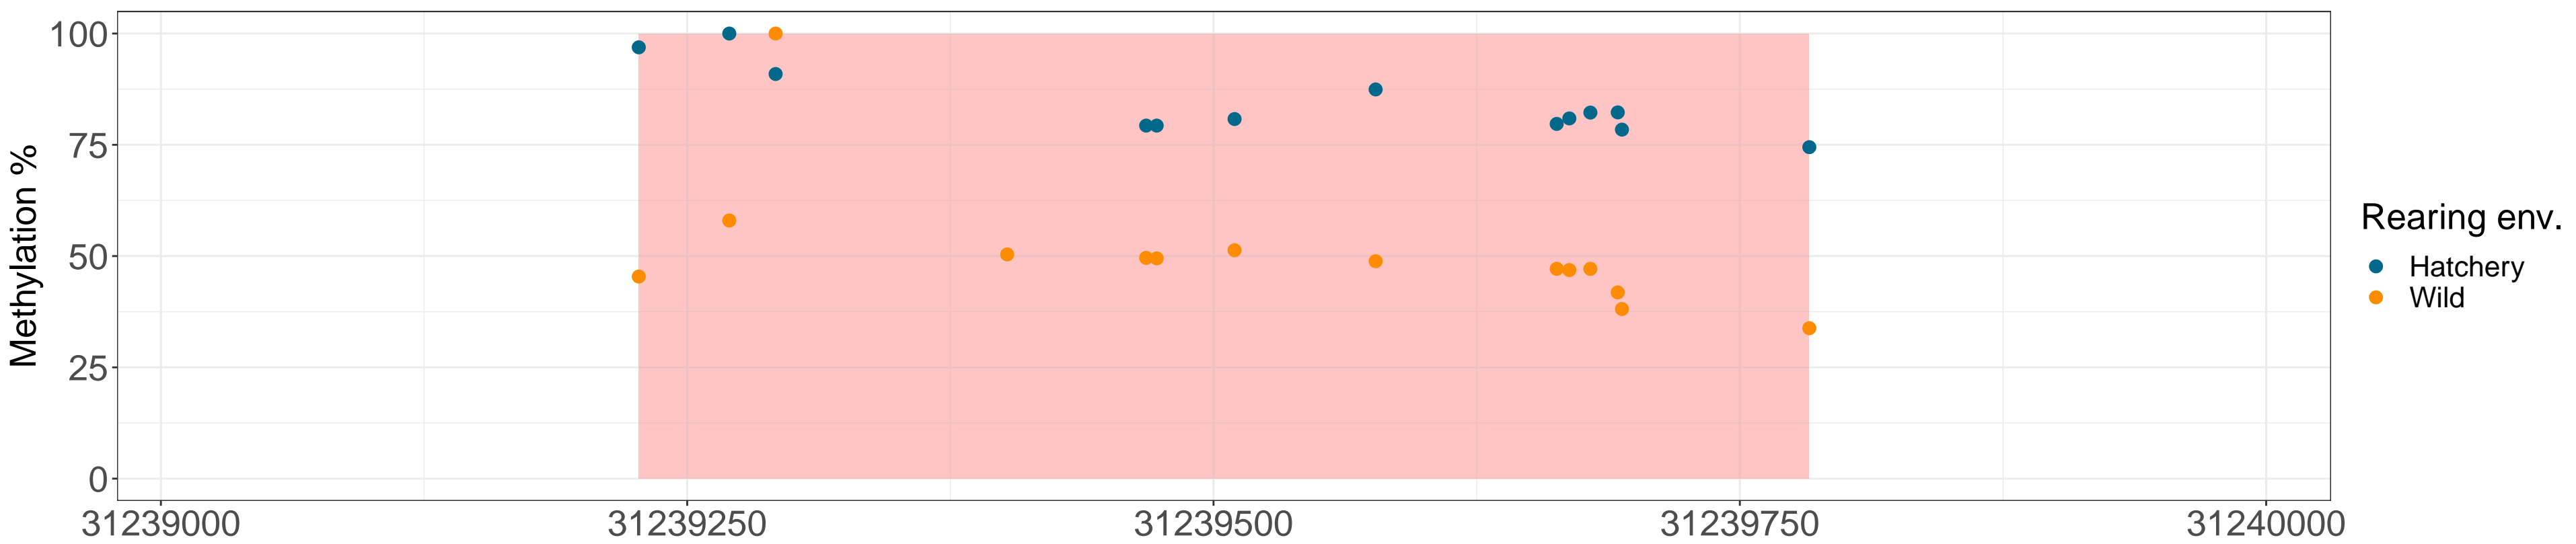**B**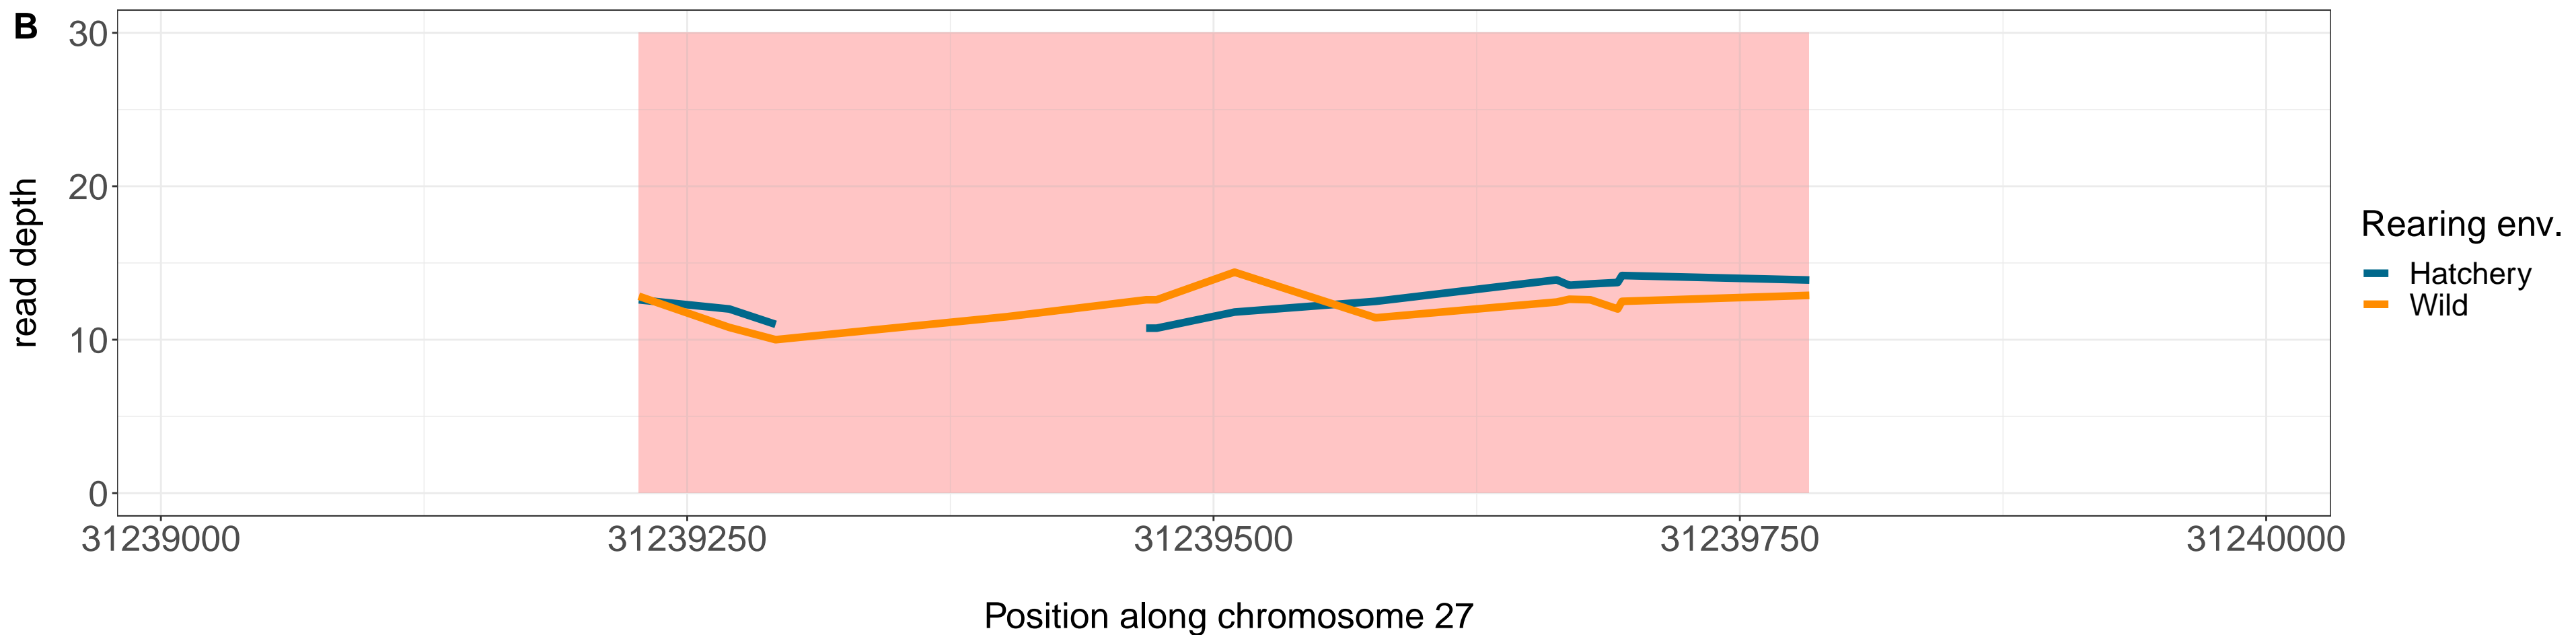

**A**

## DMR\_142

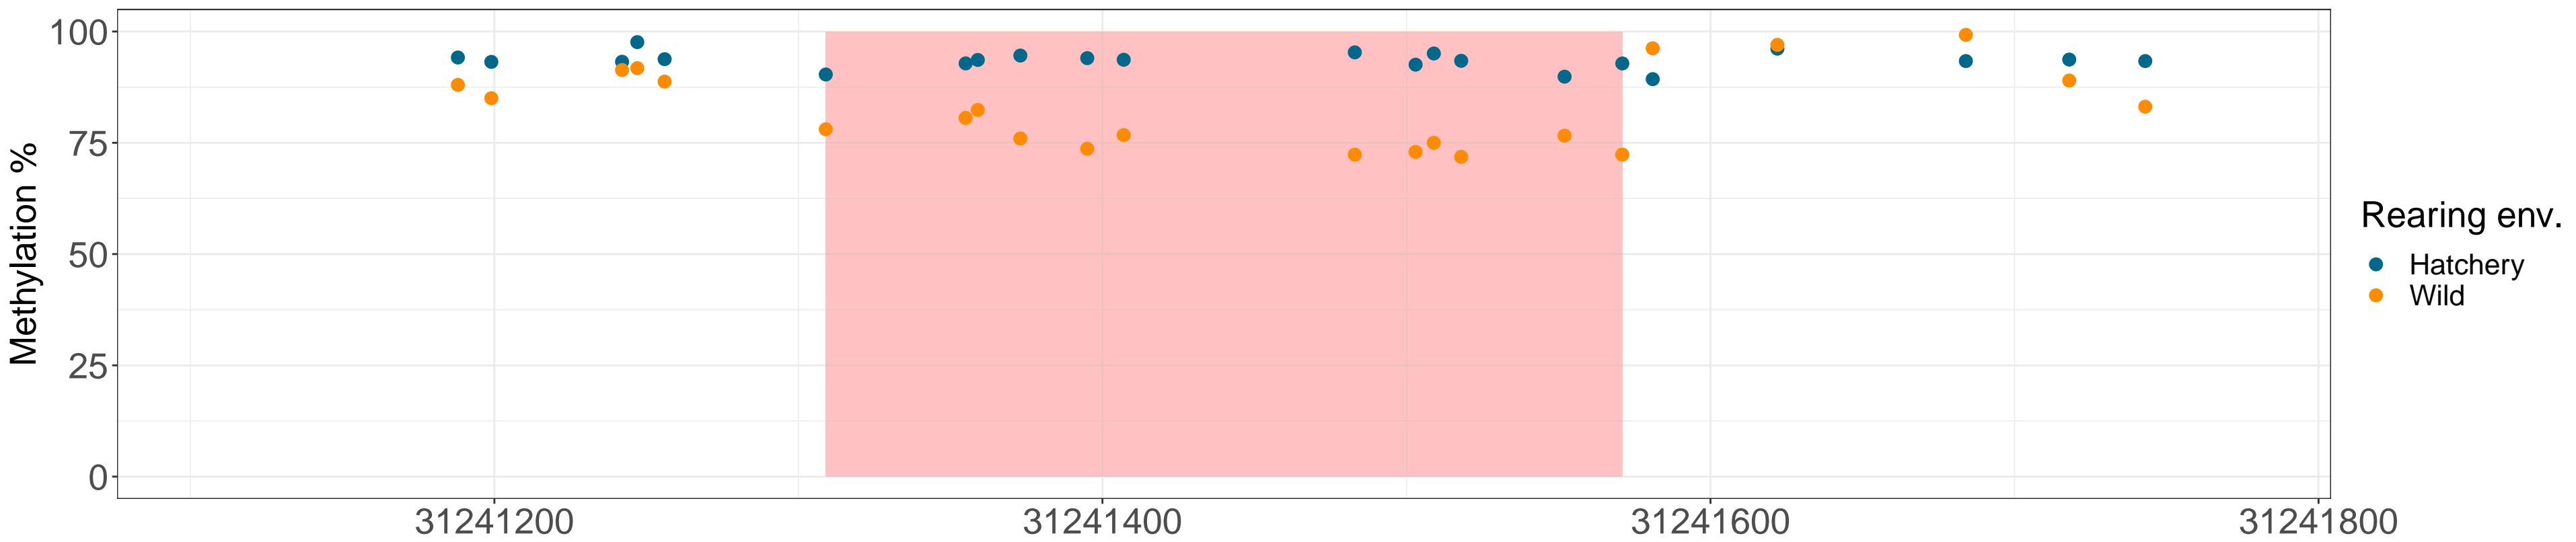**B**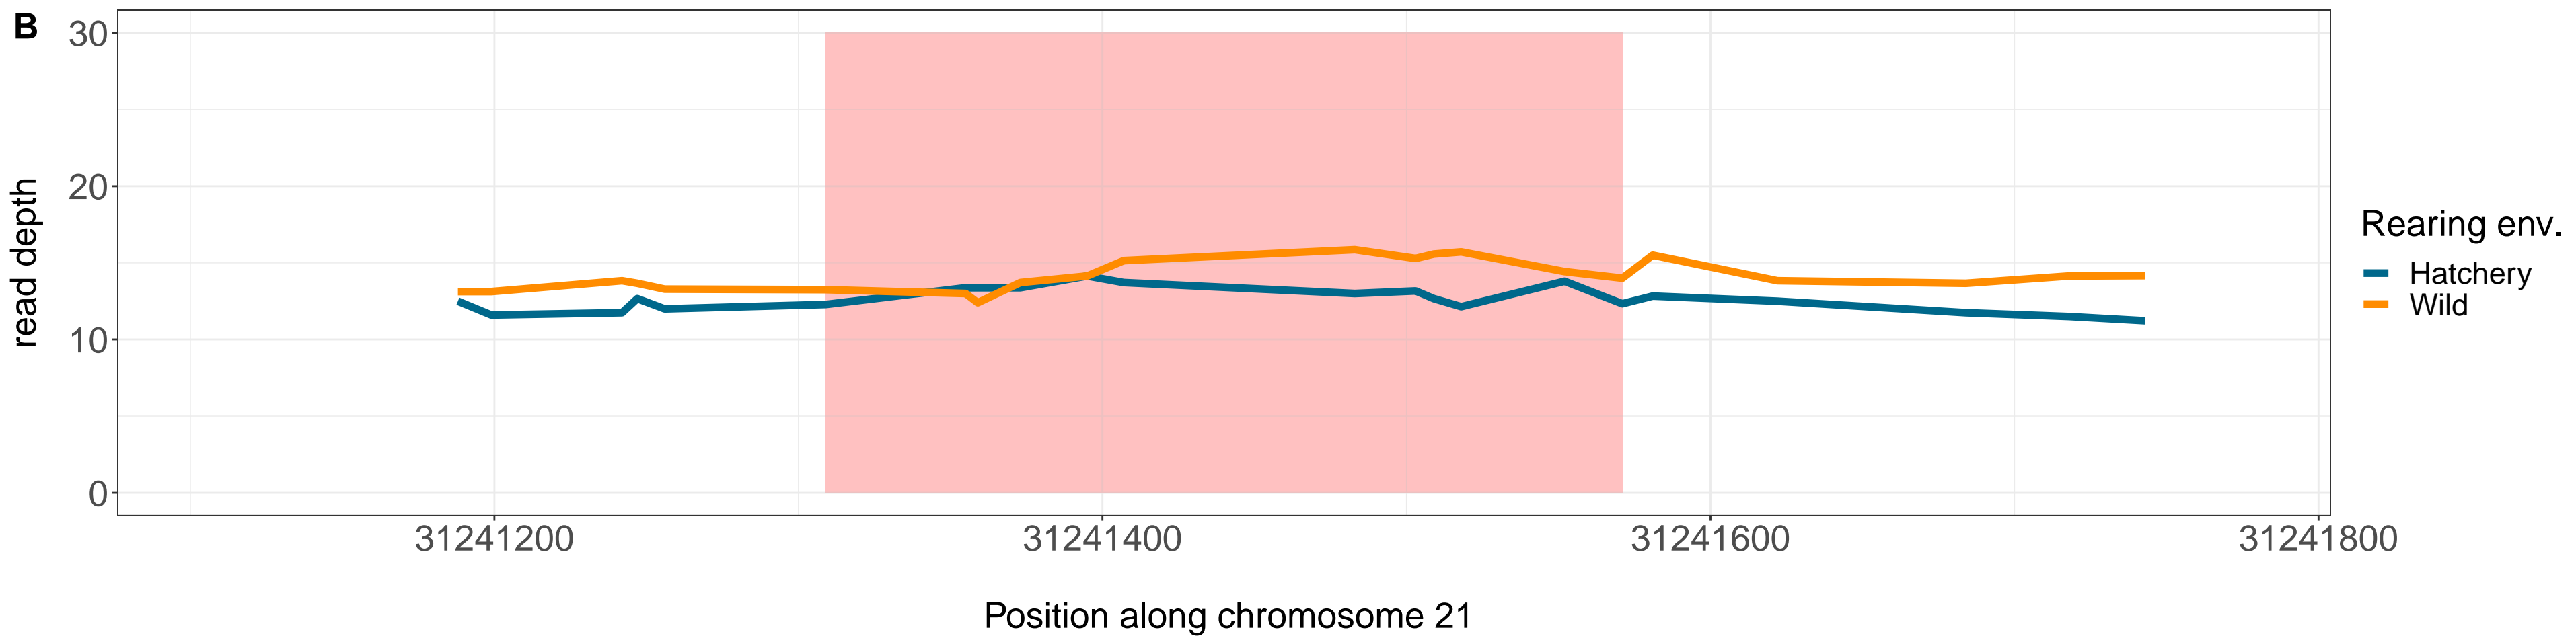

# DMR\_143

XM\_020486350.1

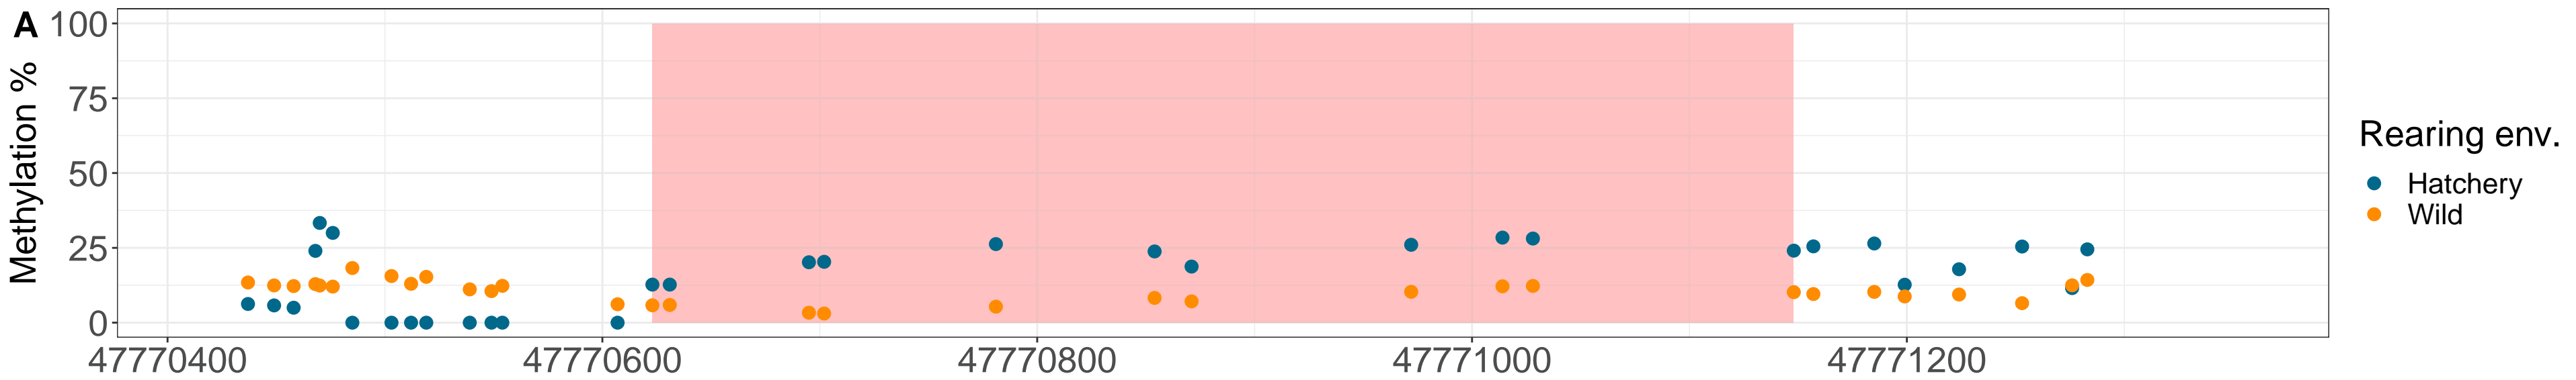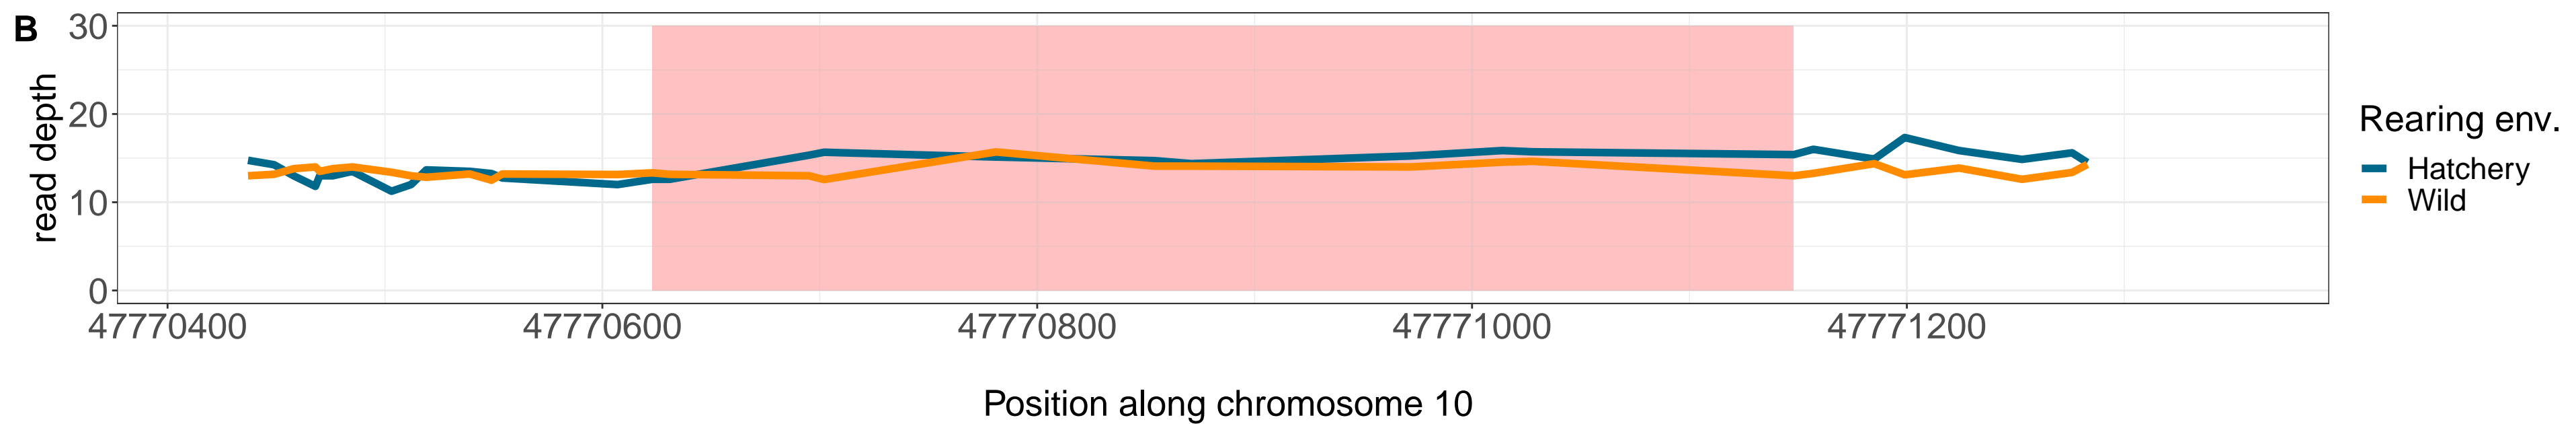

Position along chromosome 10

# DMR\_144

XM\_020455822.1

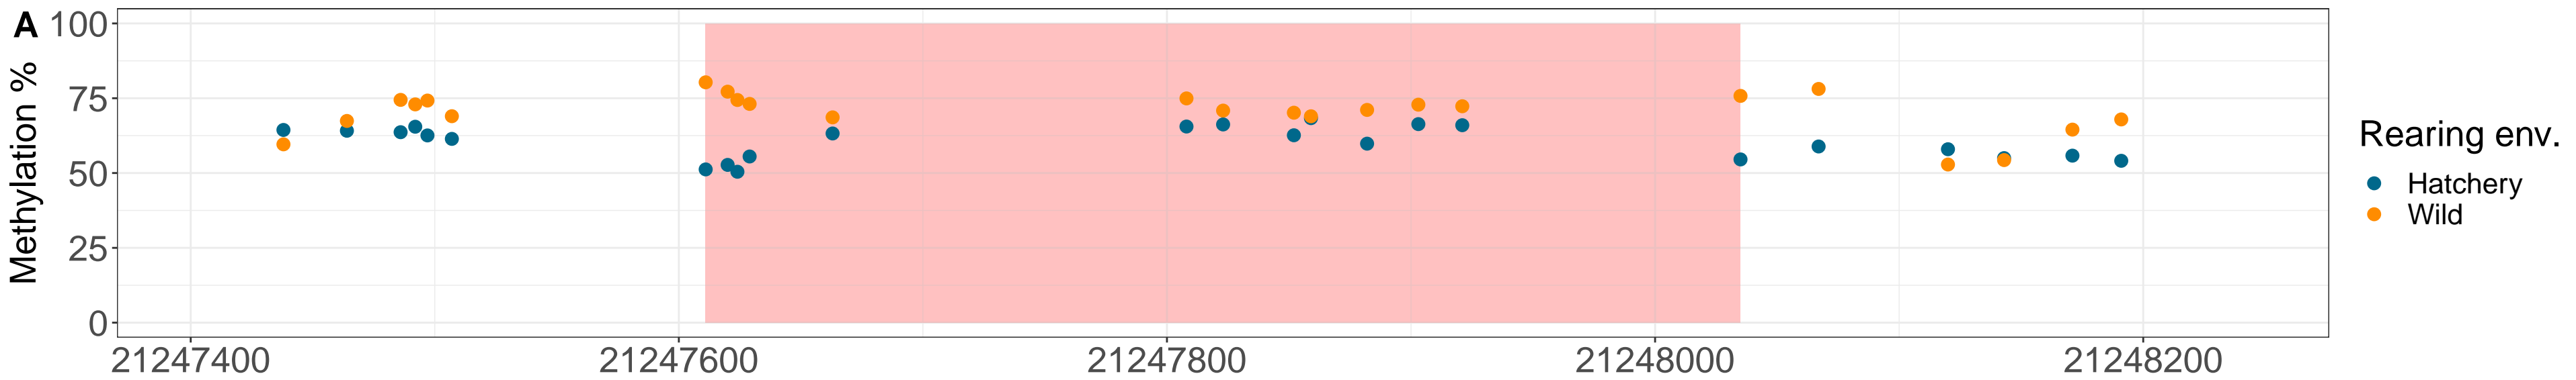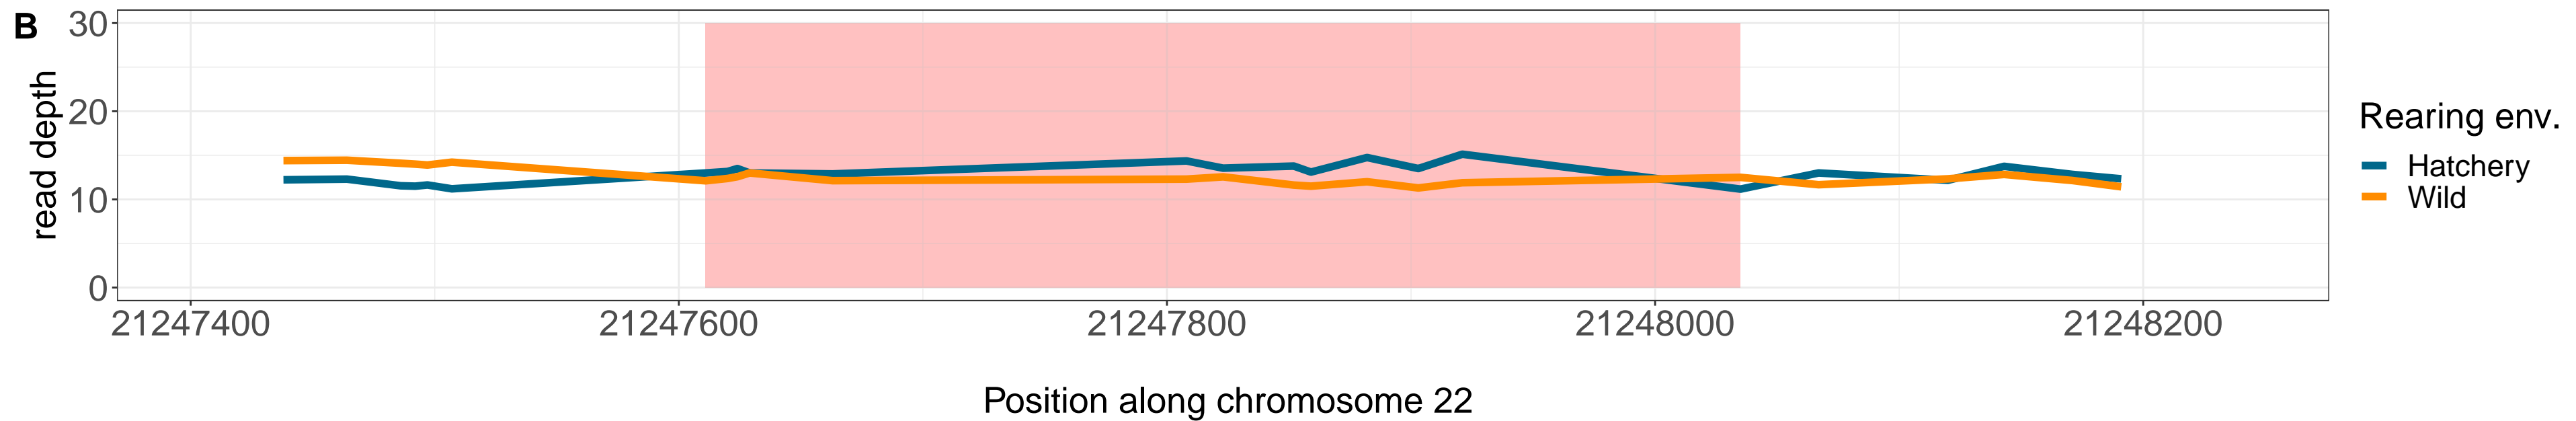

# DMR\_145

XM\_020494680.1

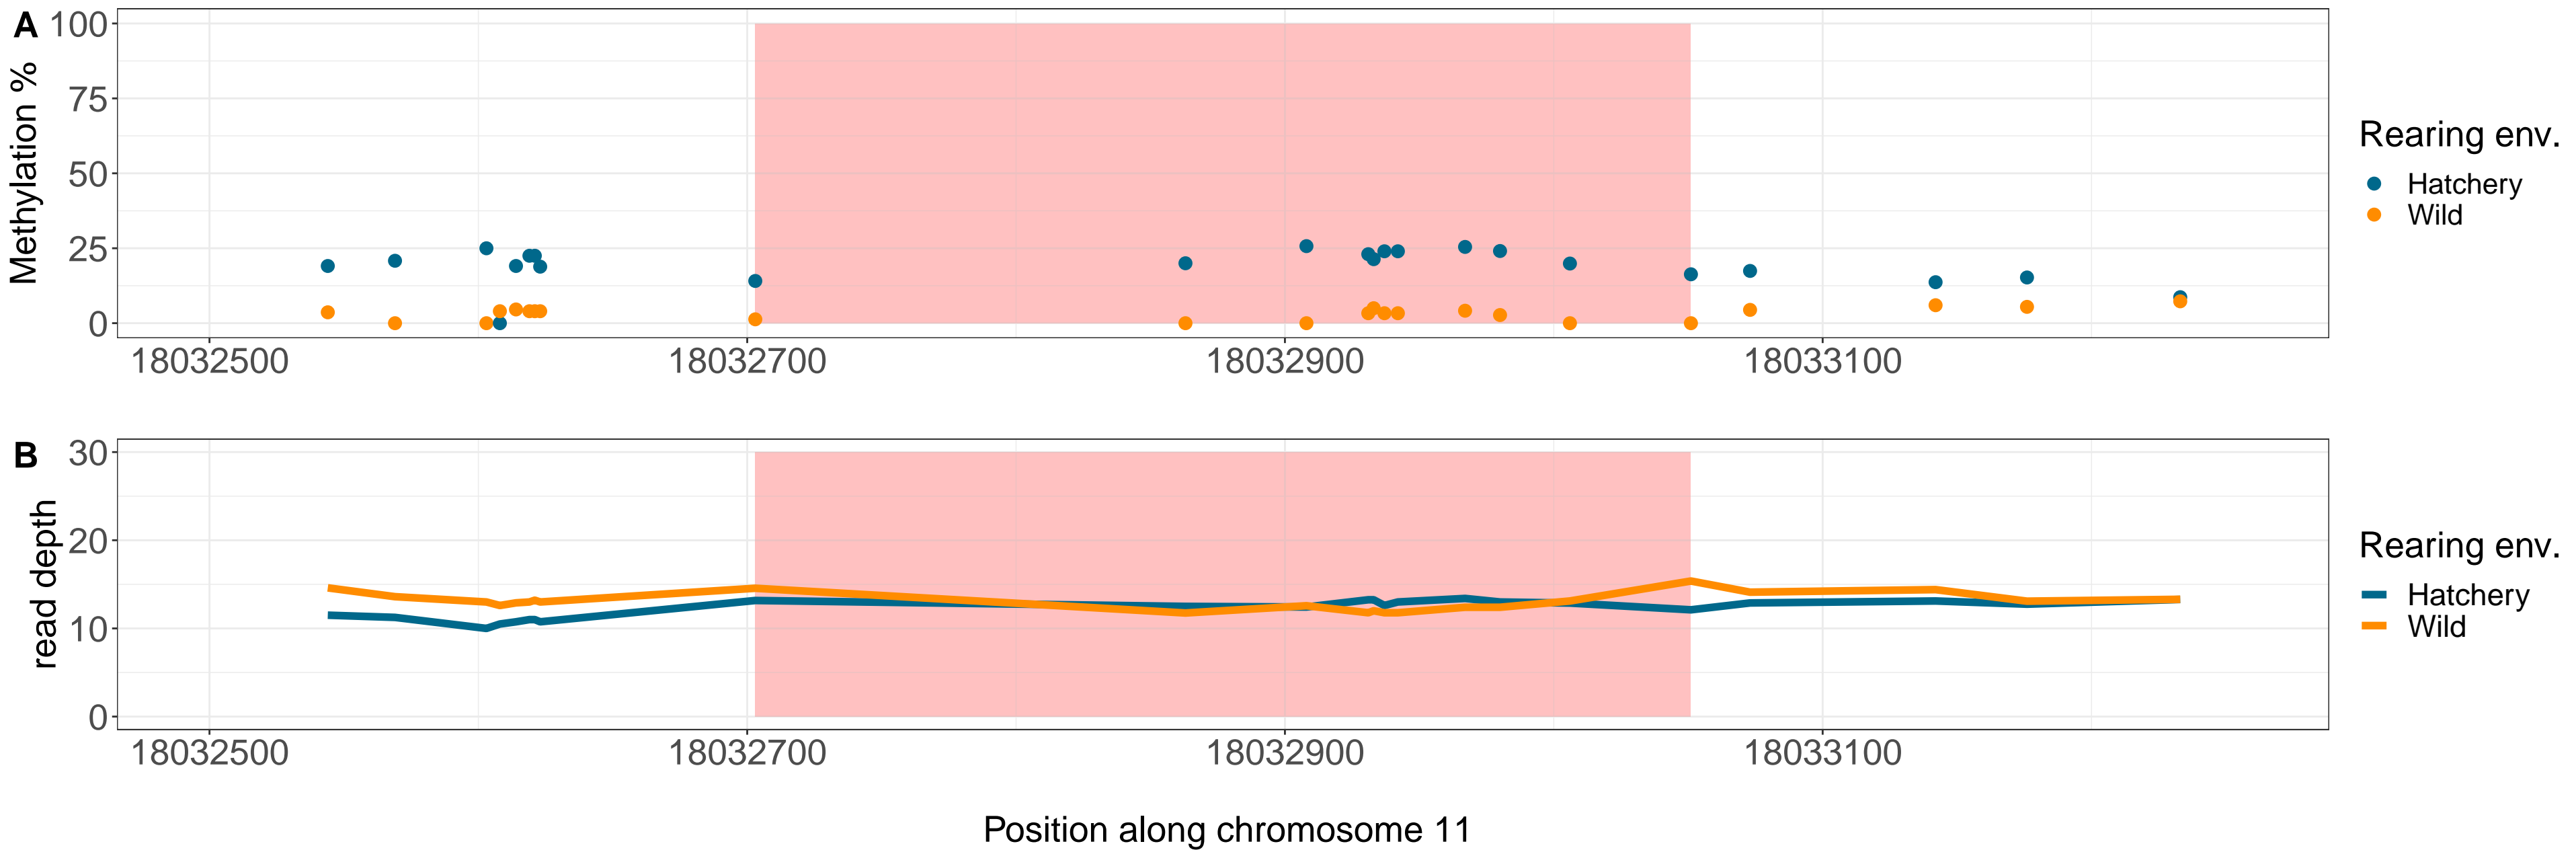

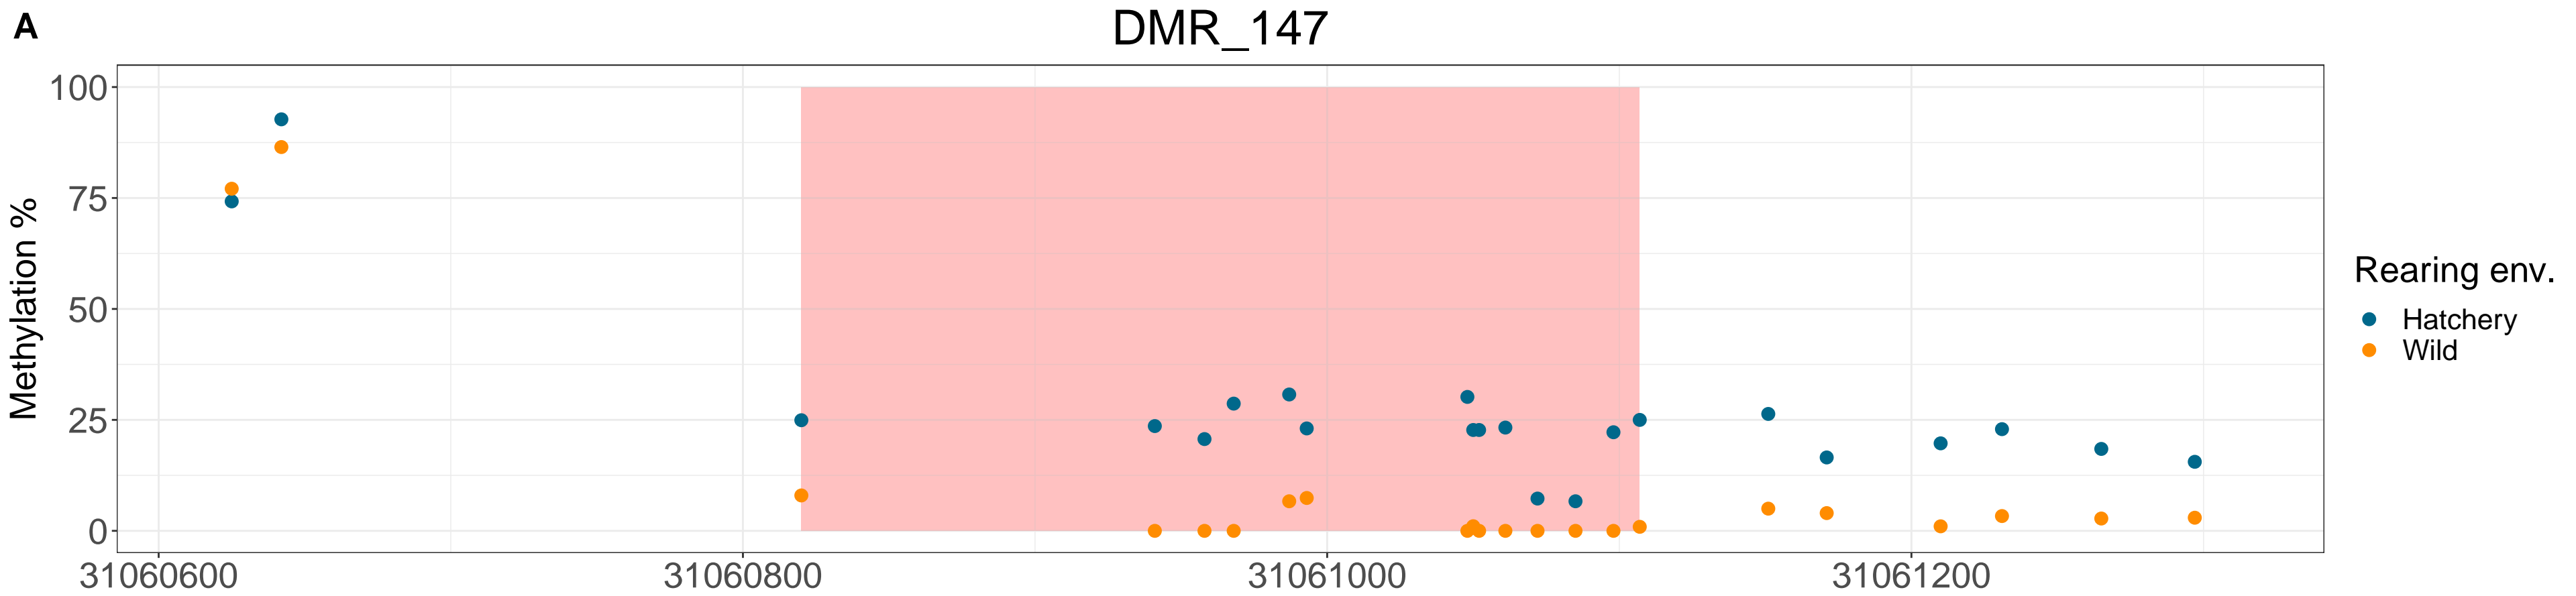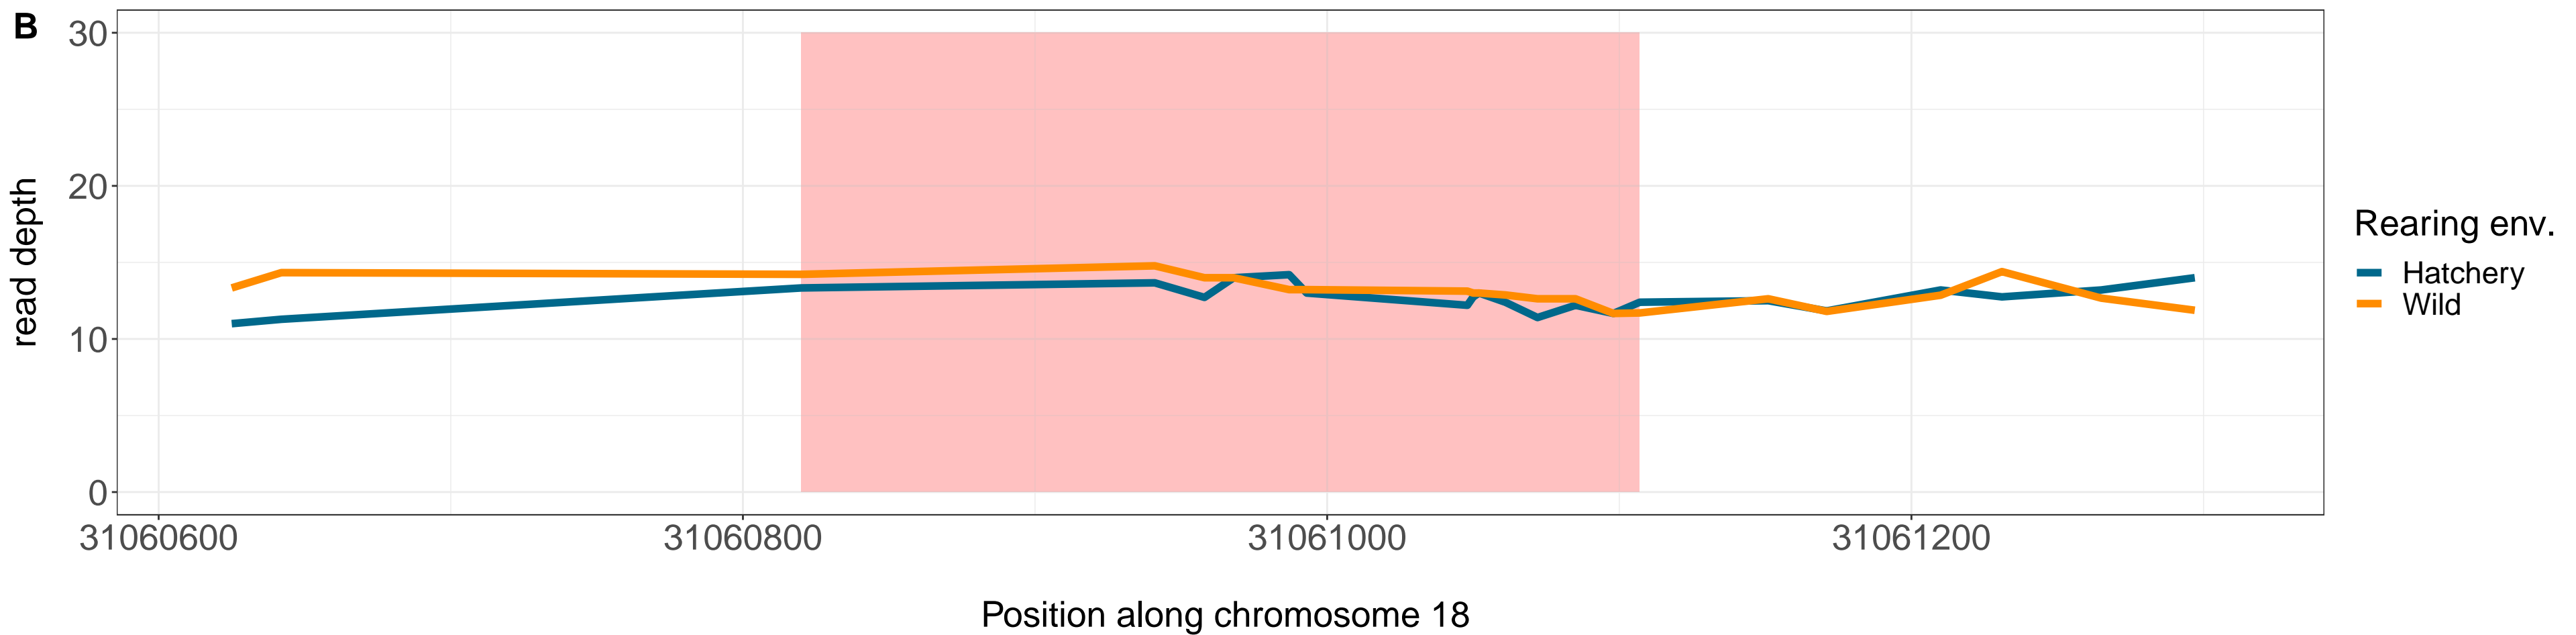

**A**

## DMR\_151

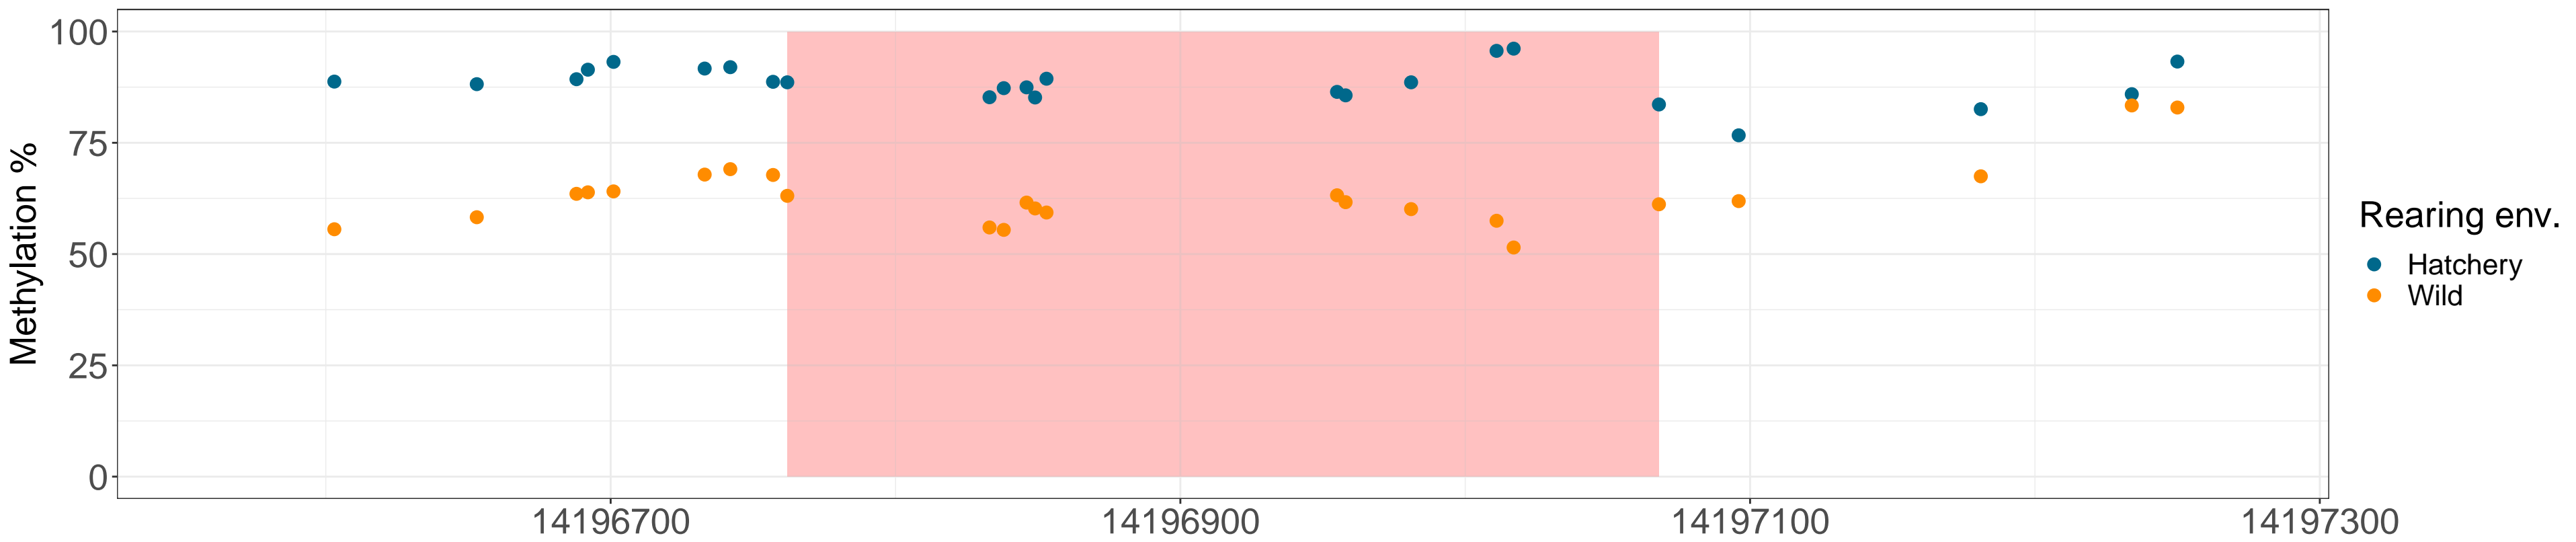**B**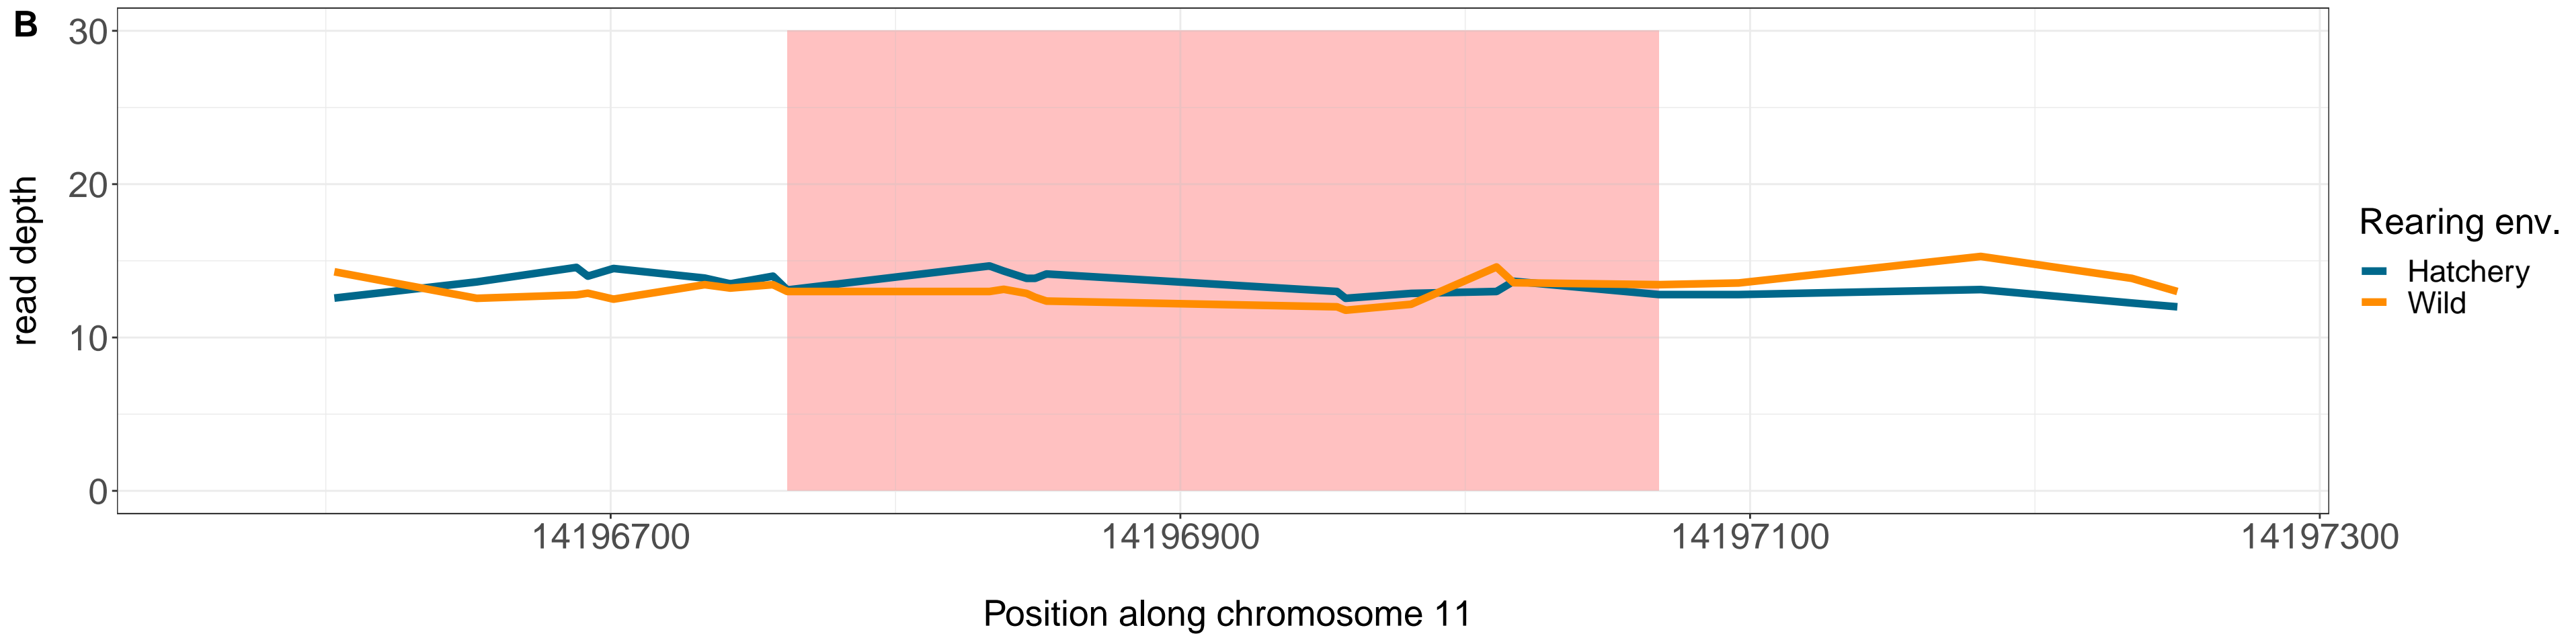

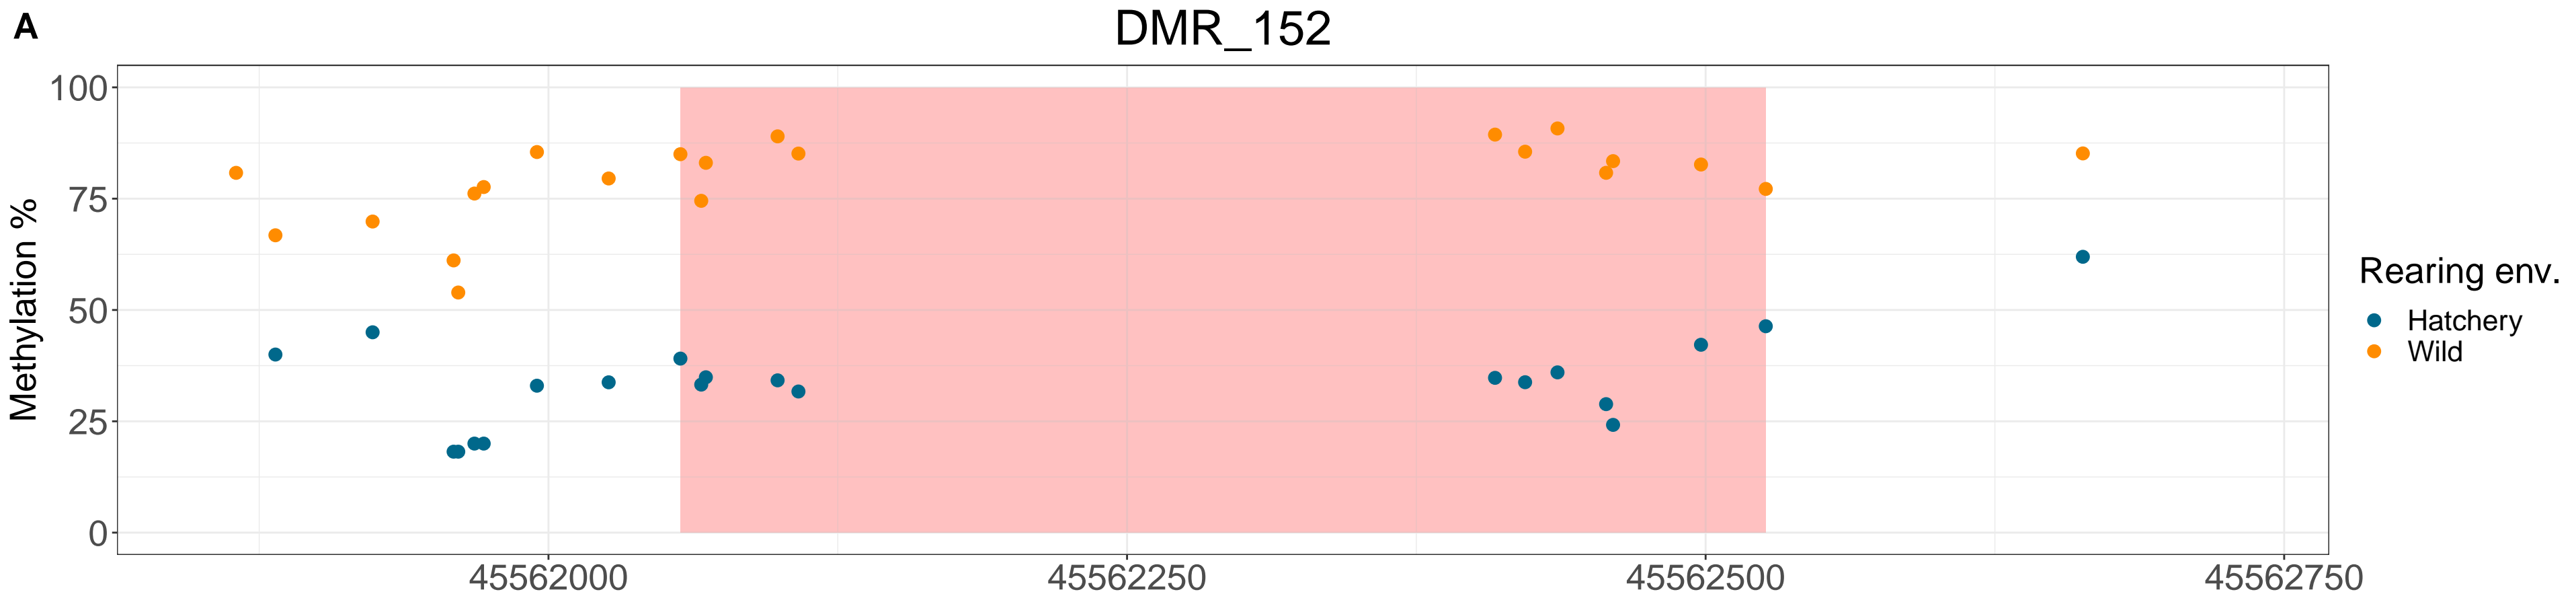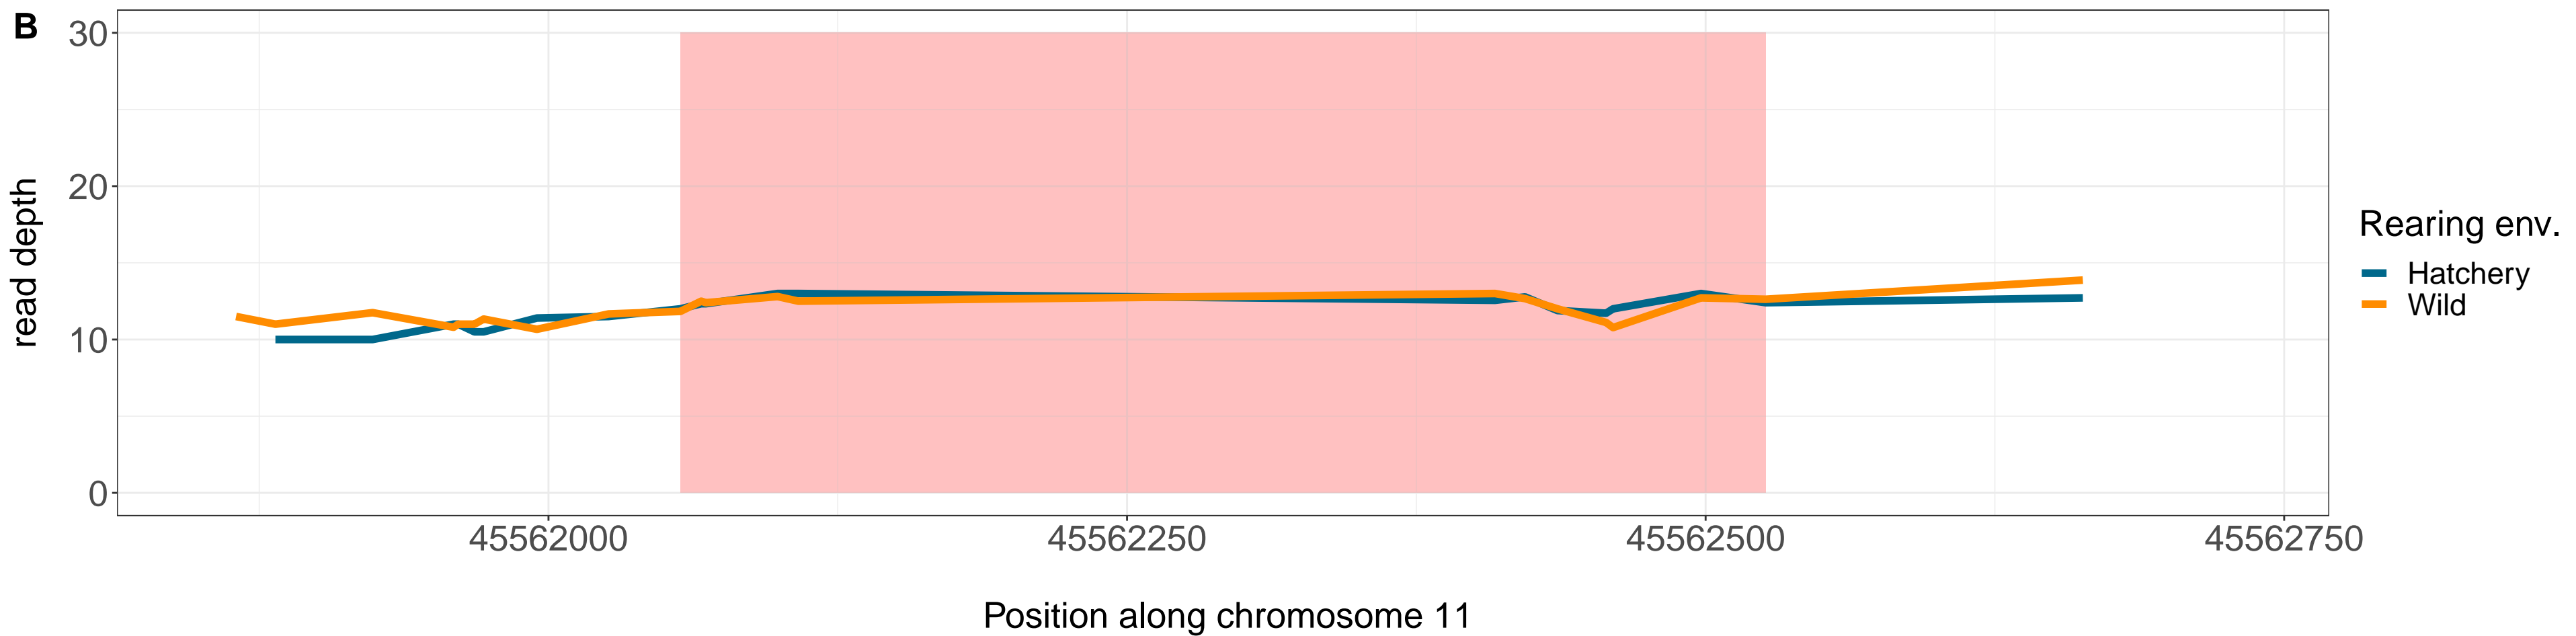



**A**

## DMR\_153

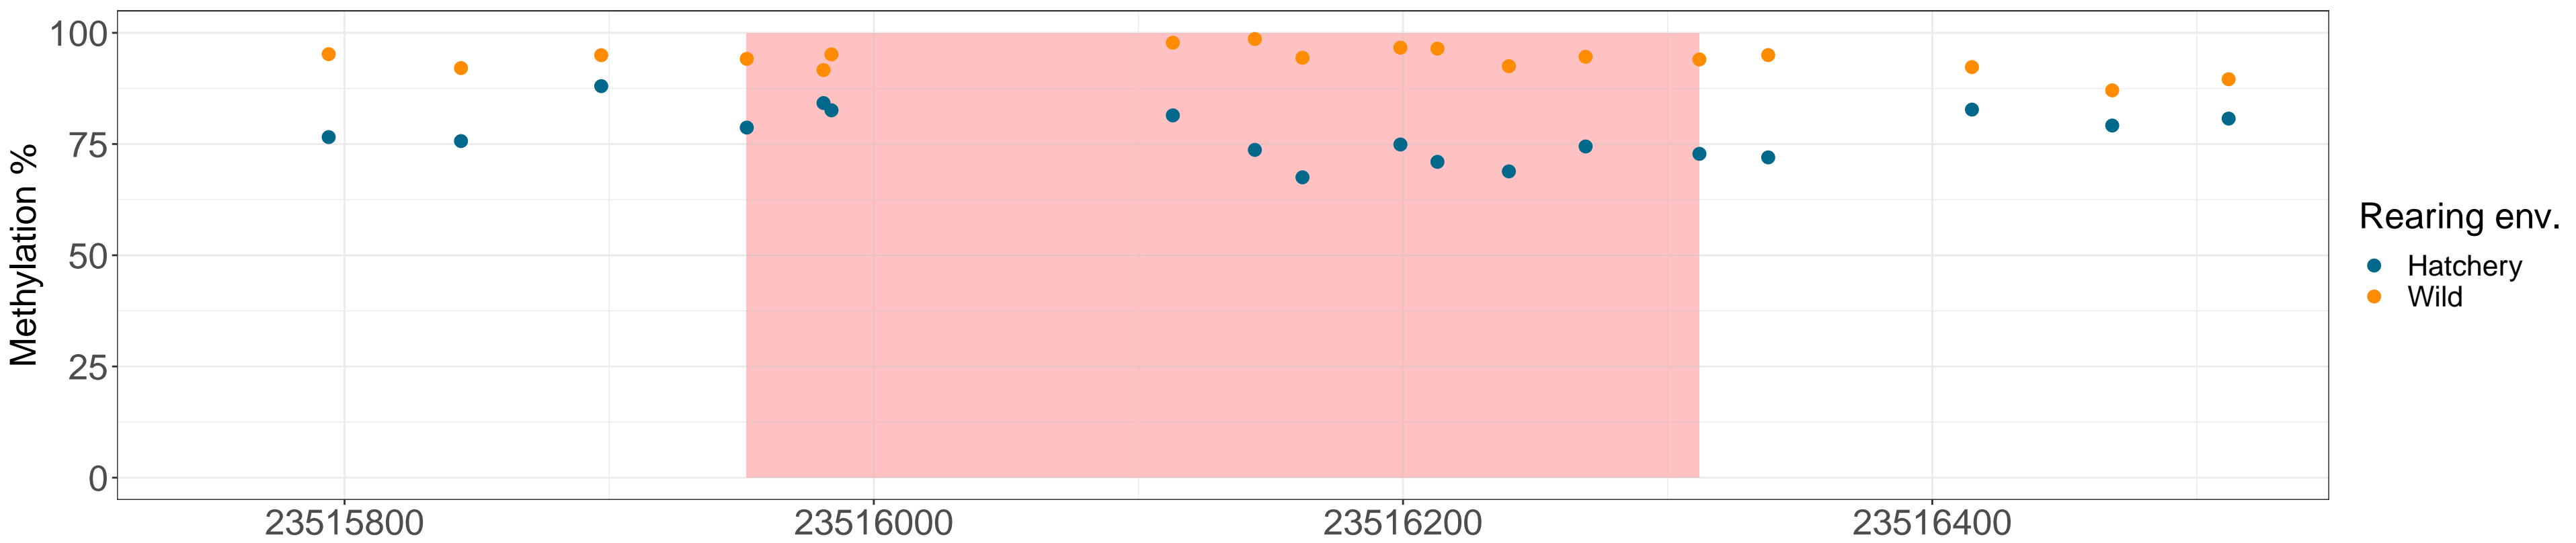**B**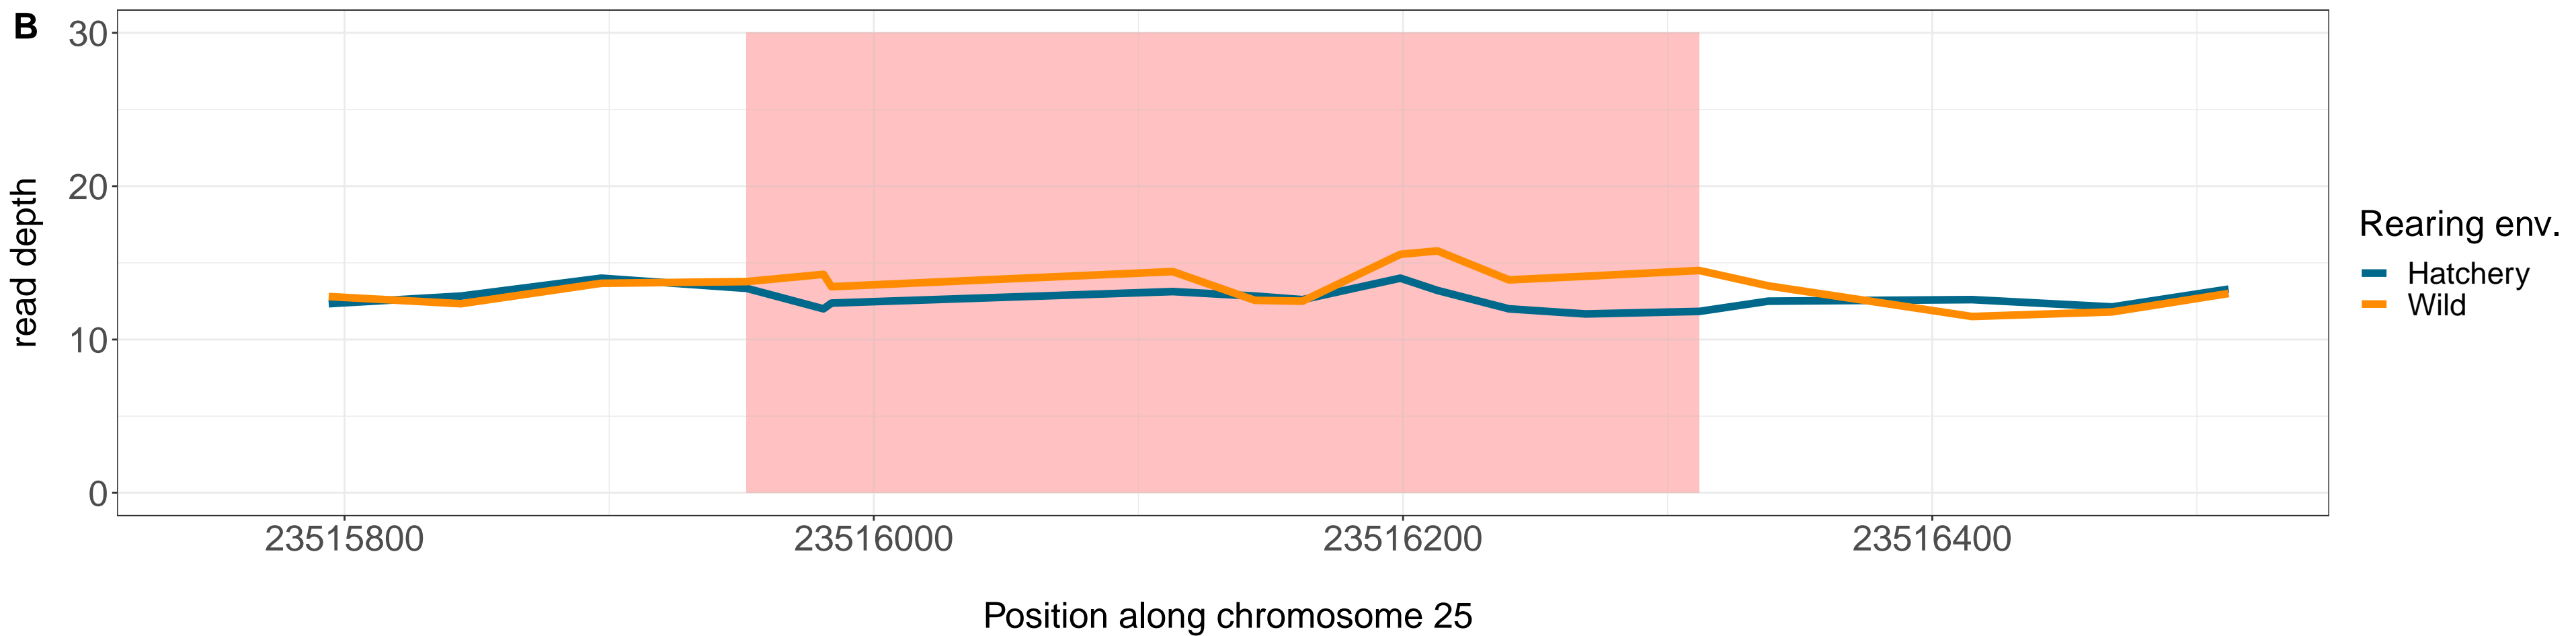

# DMR\_154

XM\_020503947.1

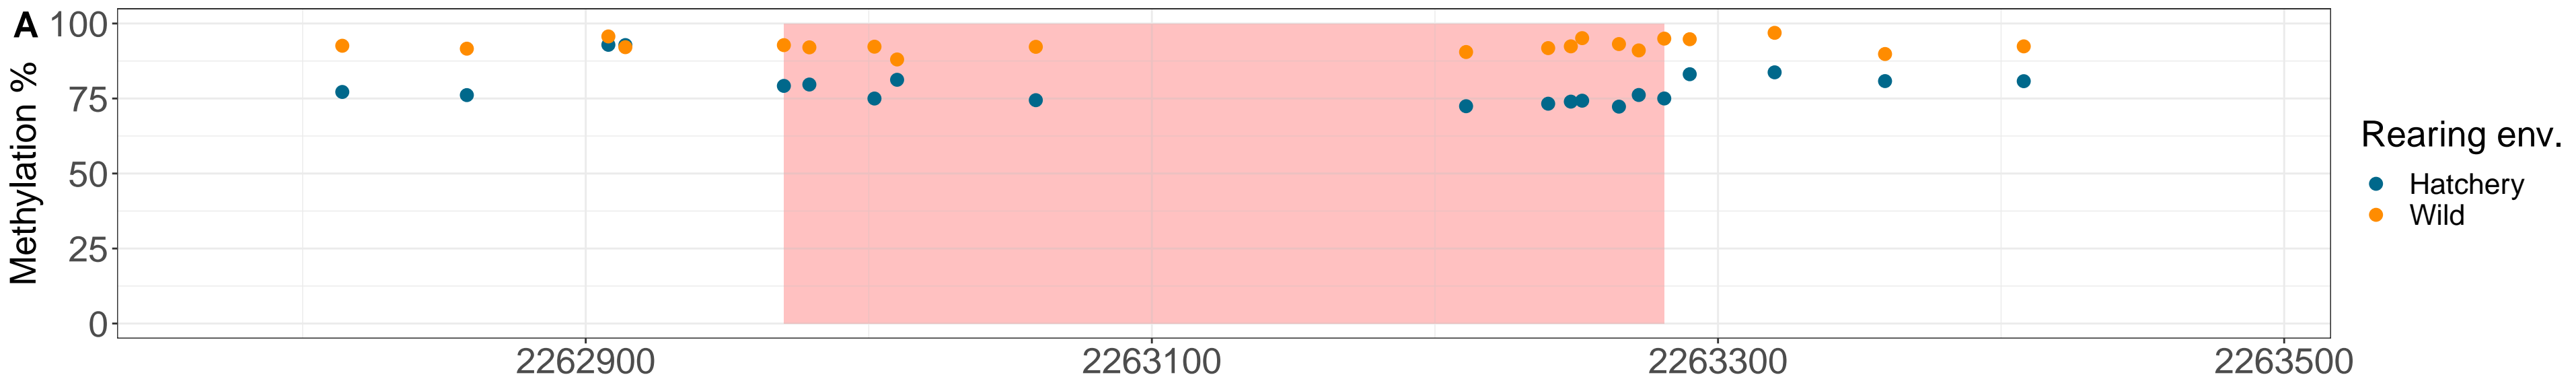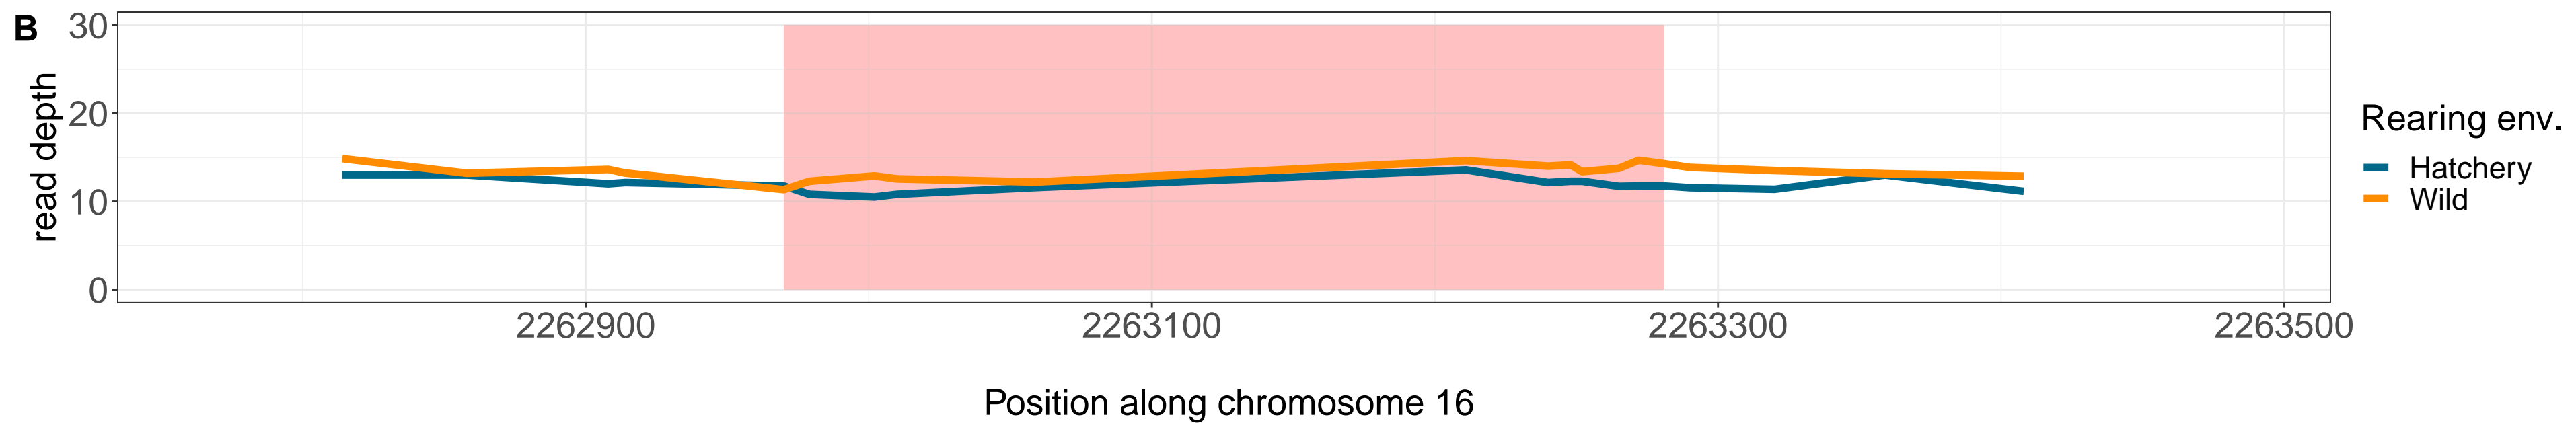

Position along chromosome 16

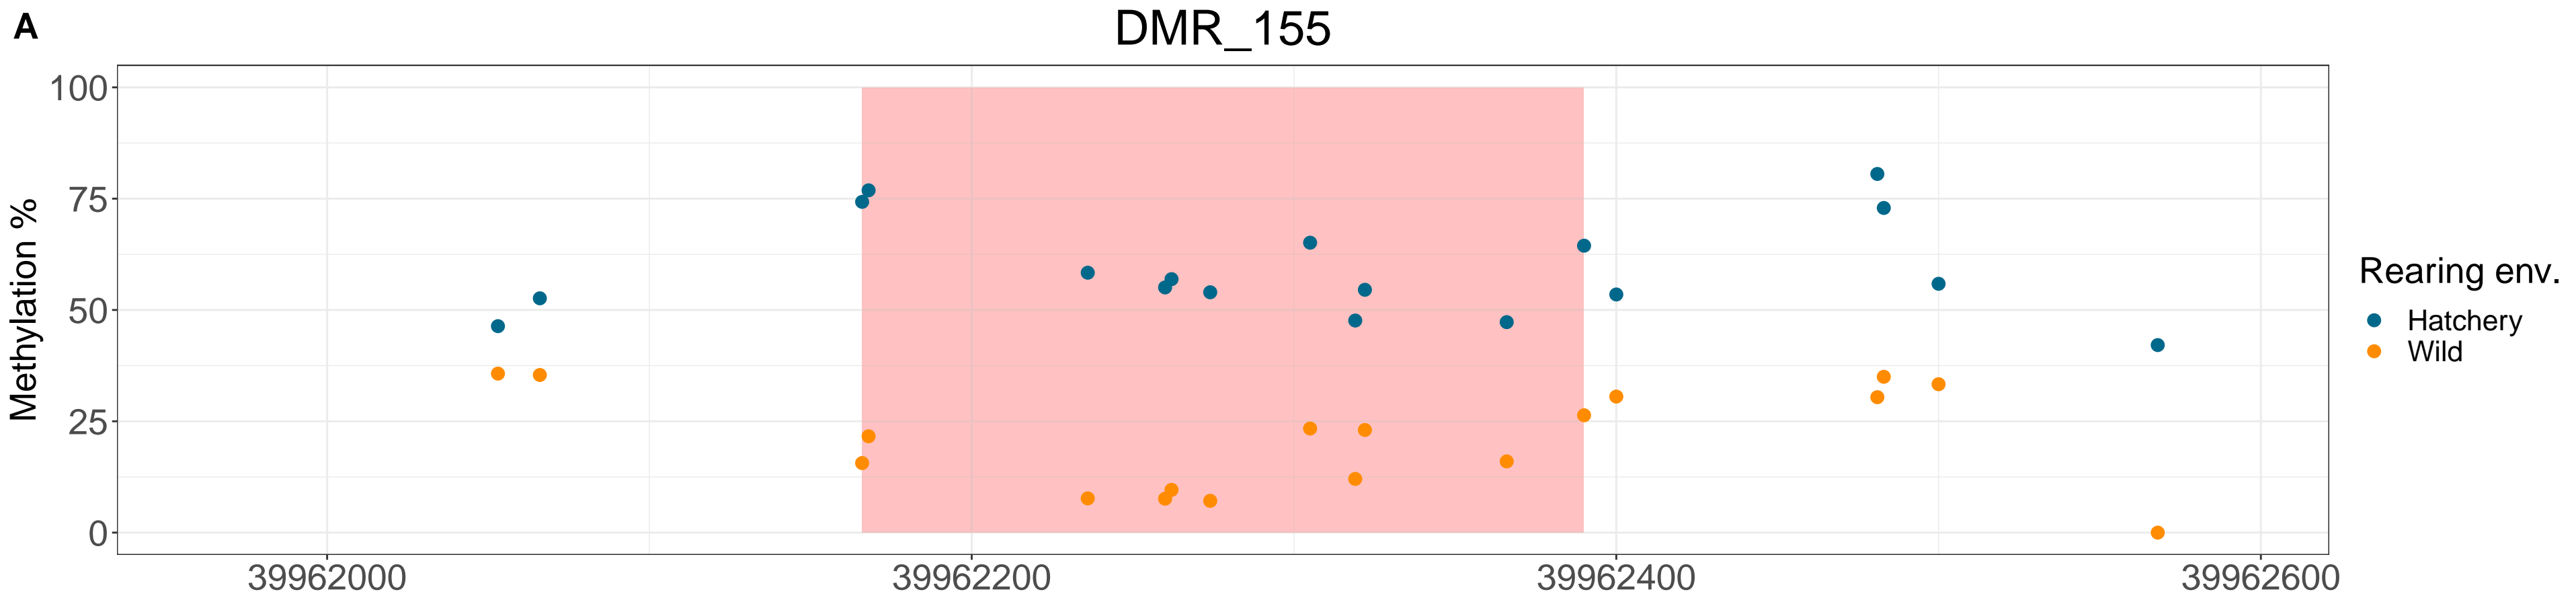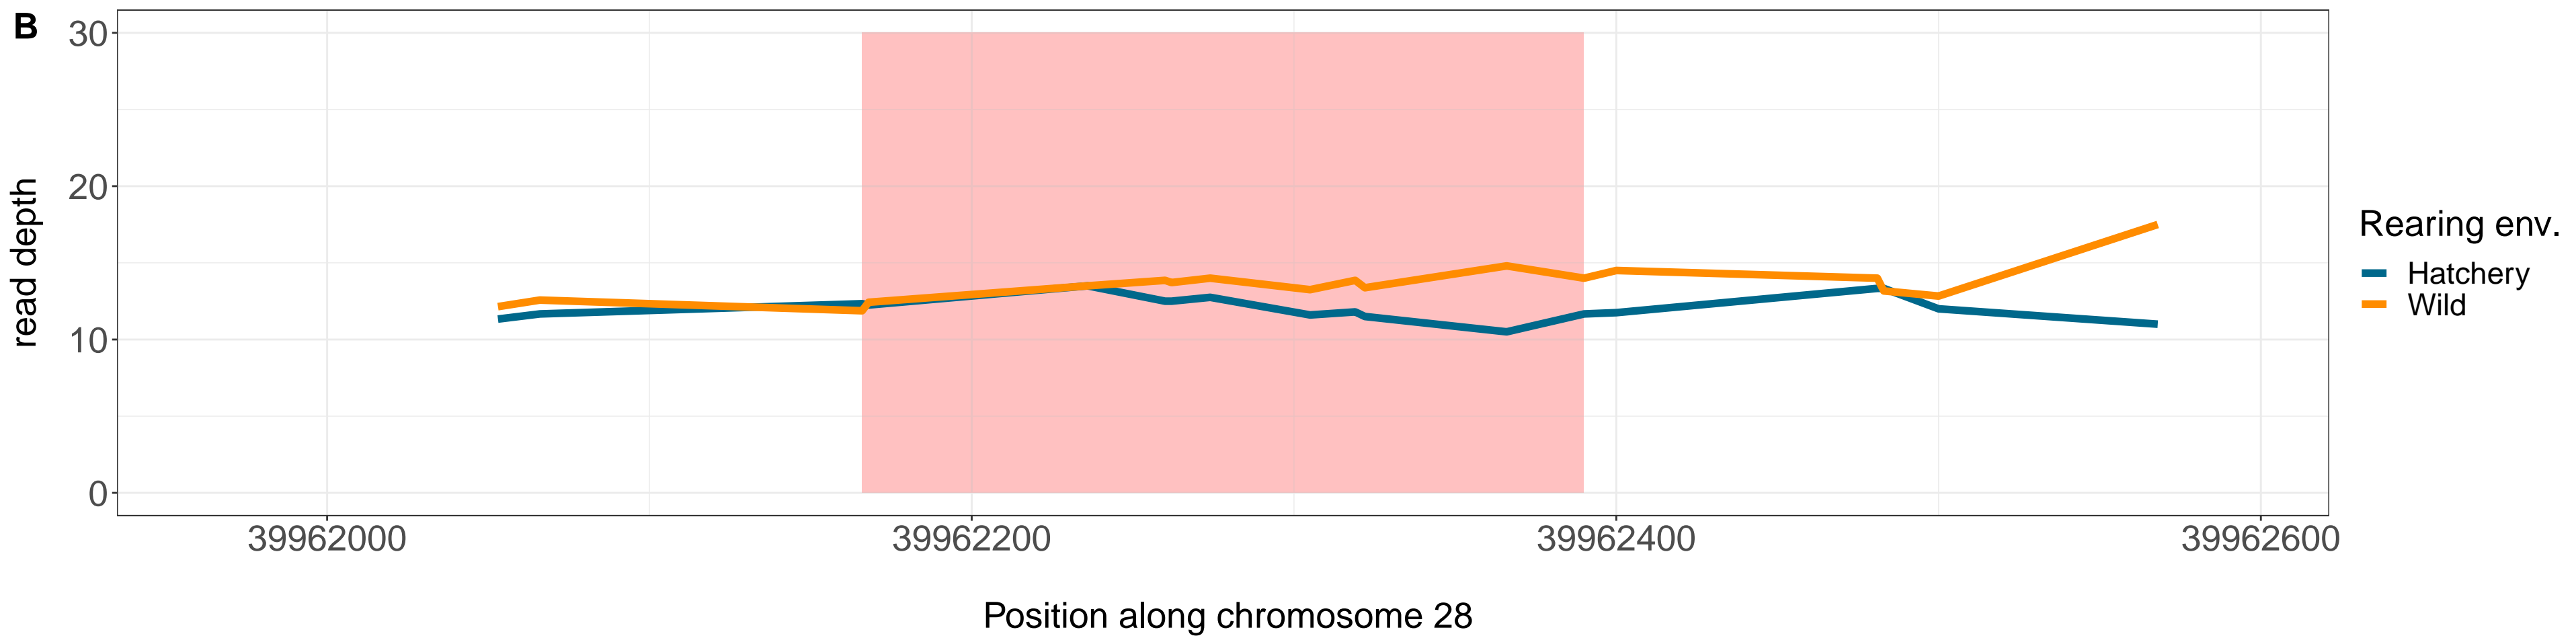

# DMR\_156

XM\_020488007.1

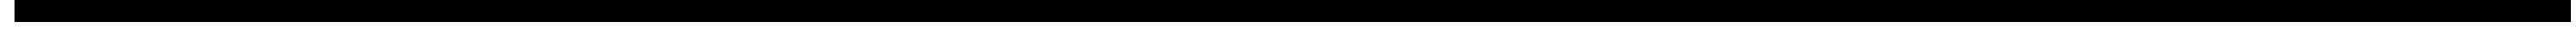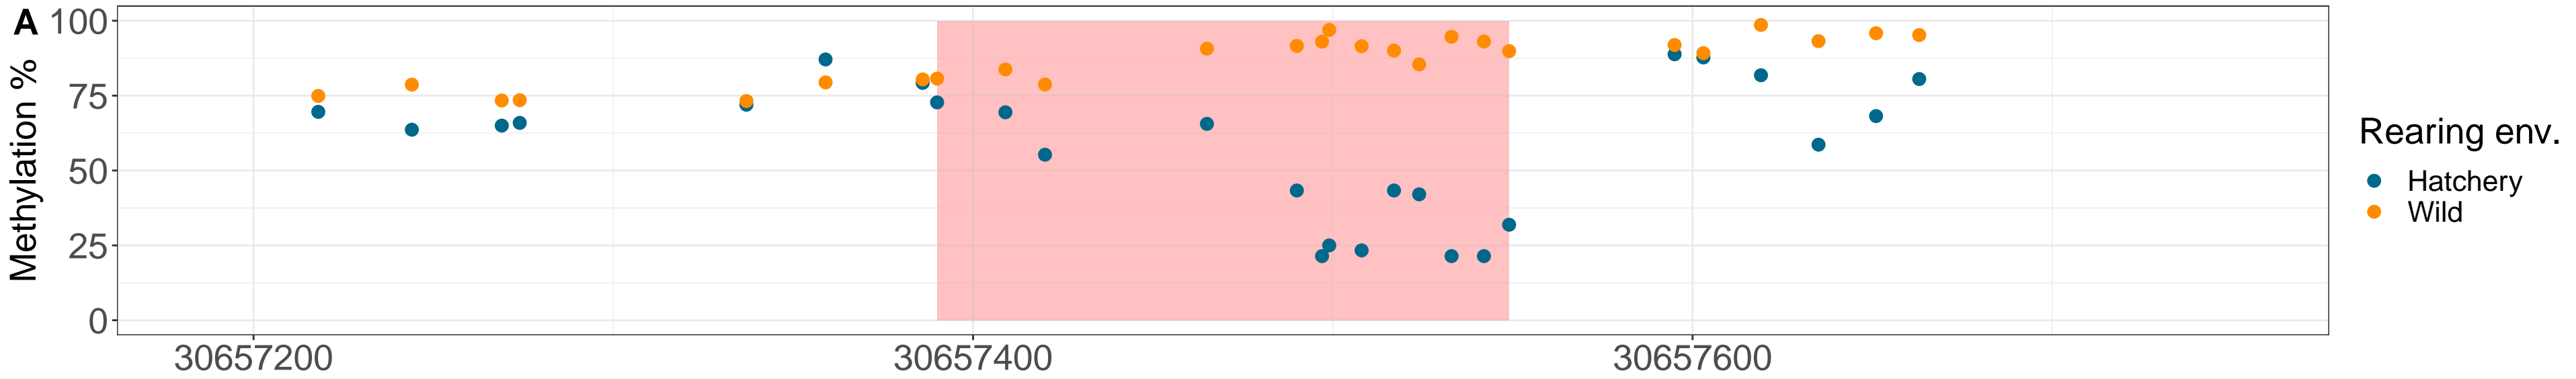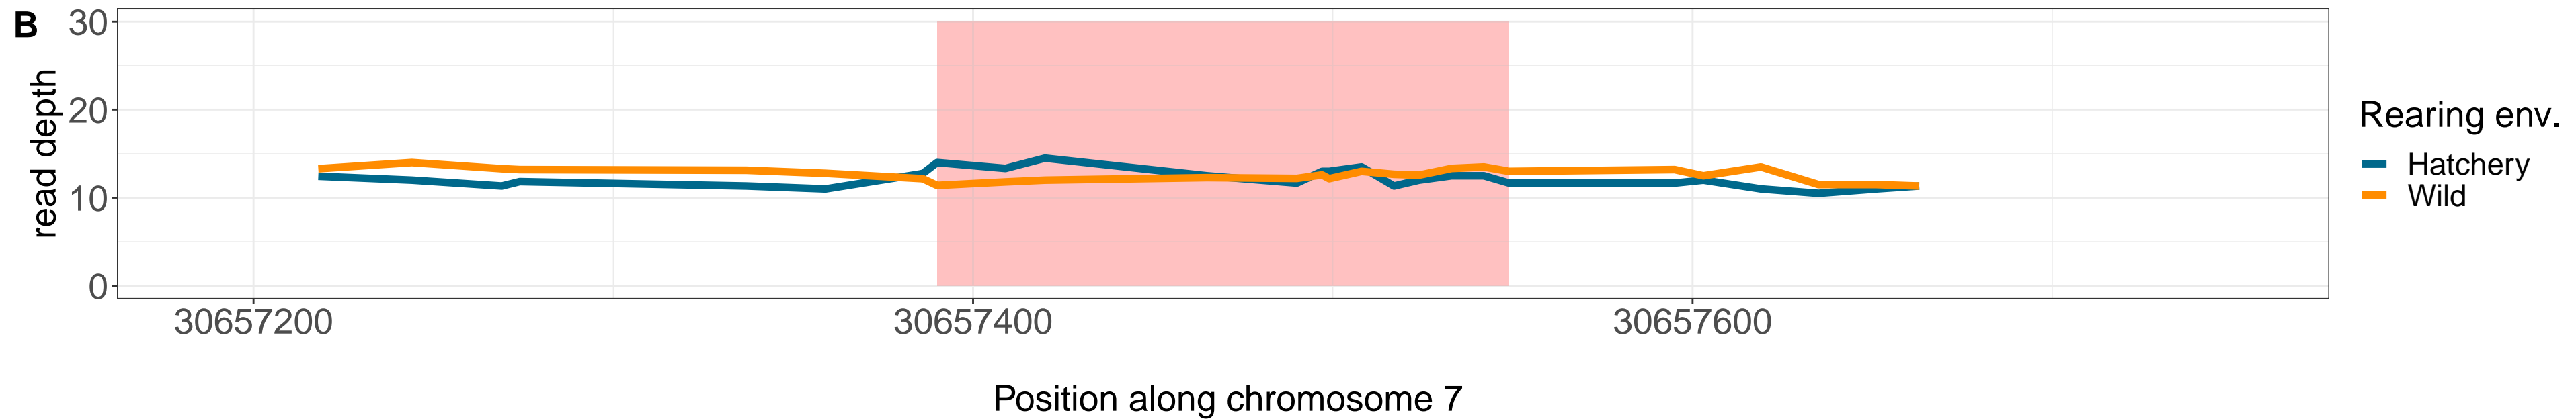

**A**

## DMR\_158

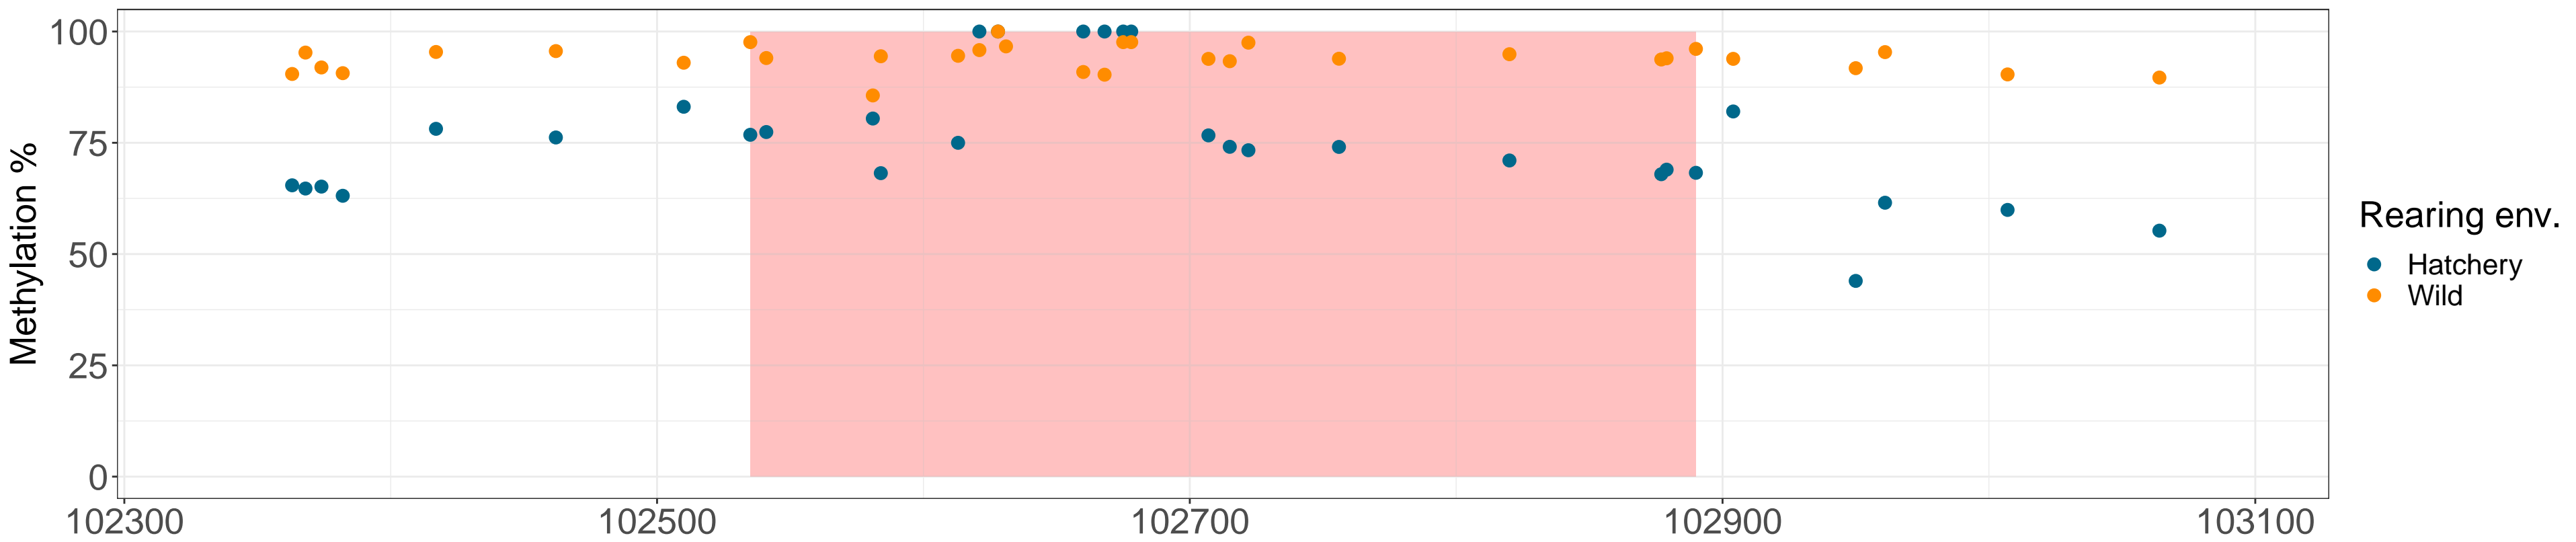**B**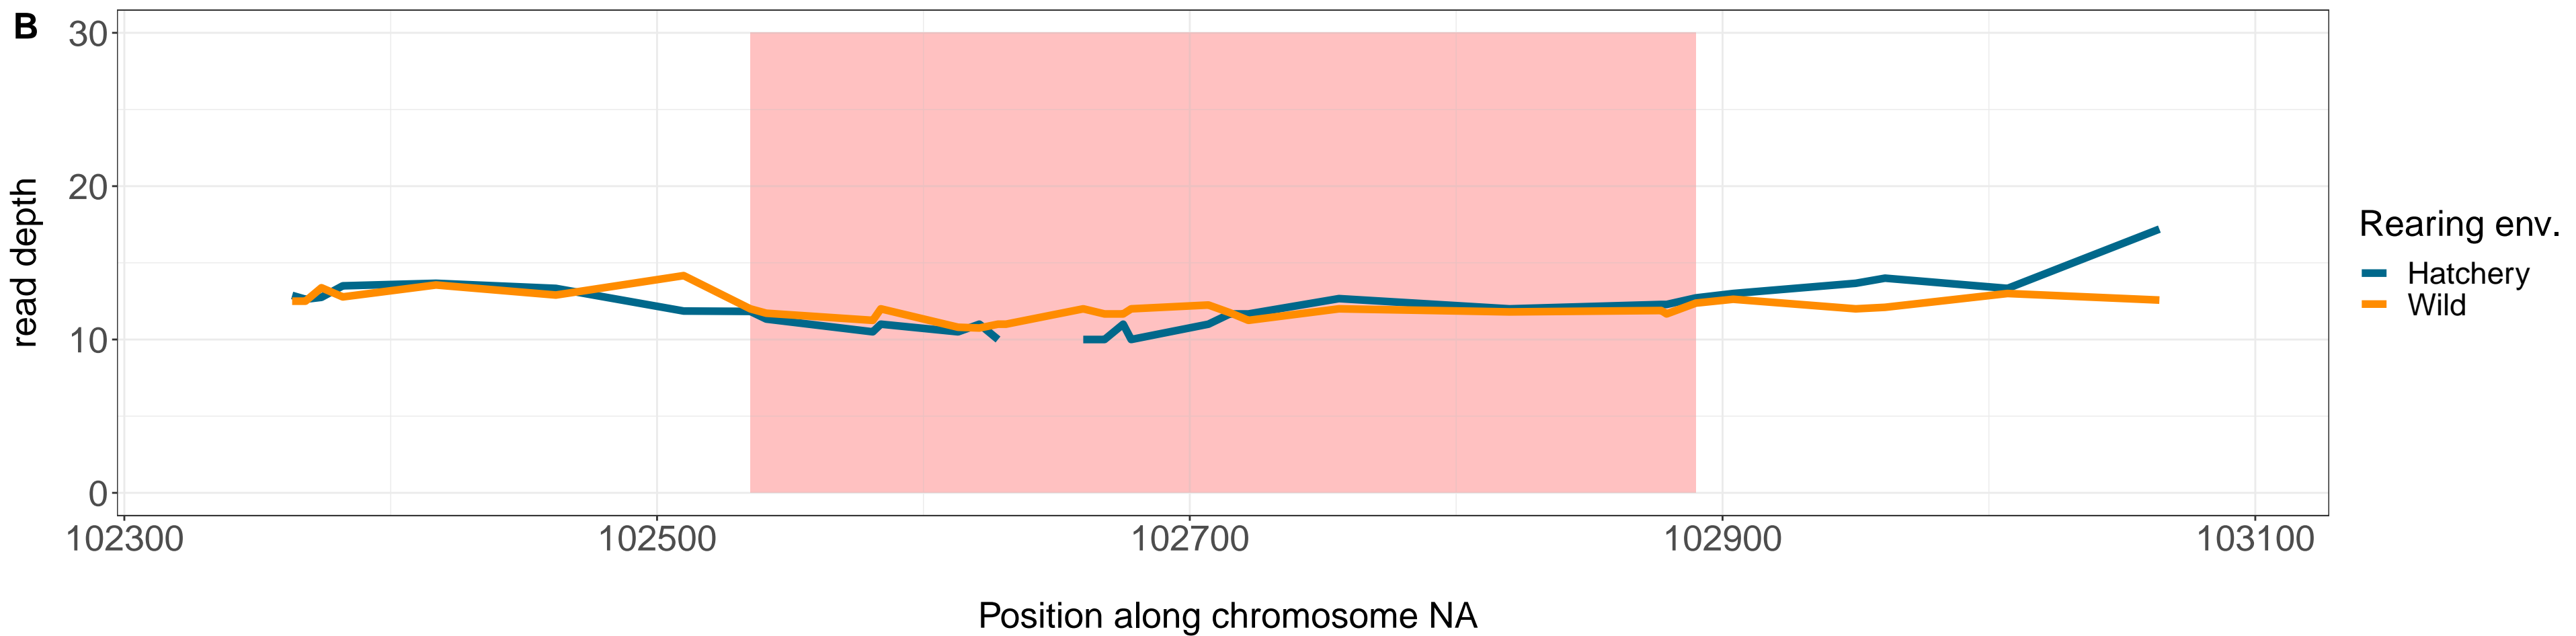

# DMR\_159

XM\_020455546.1

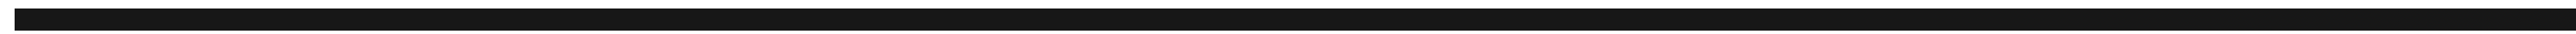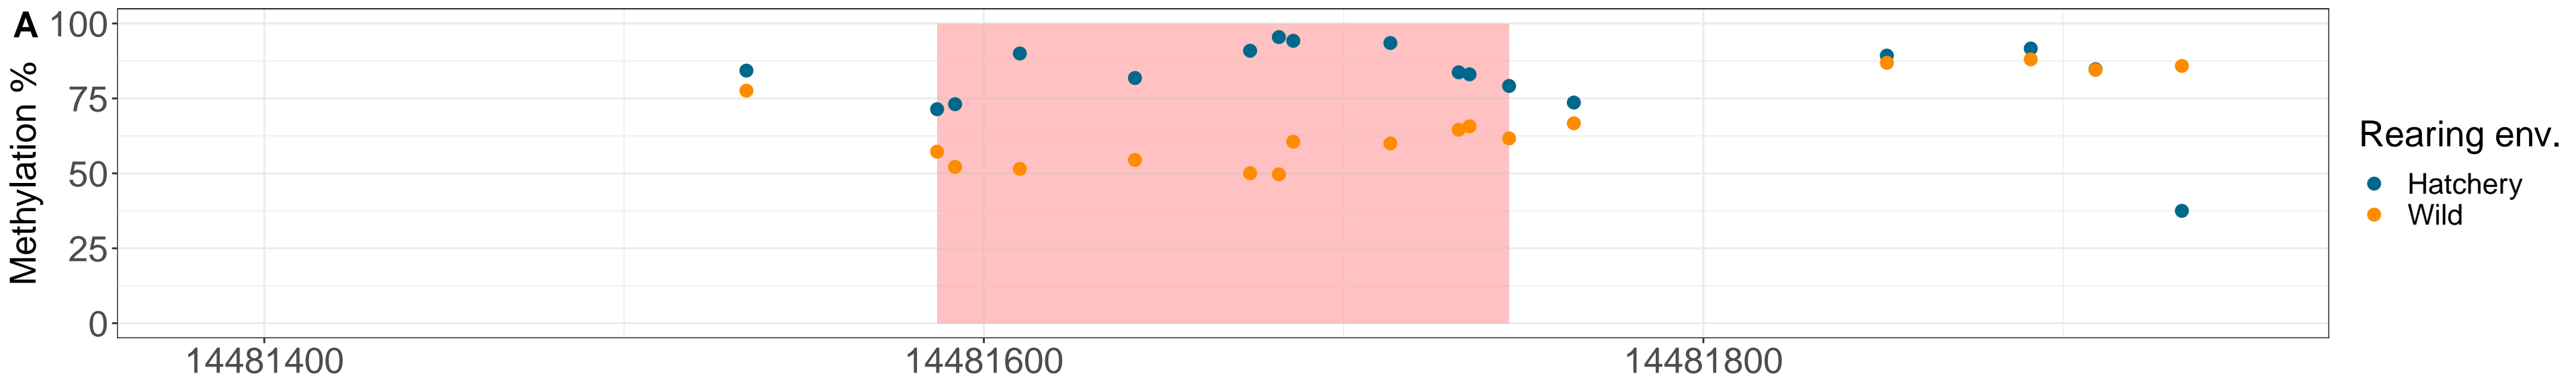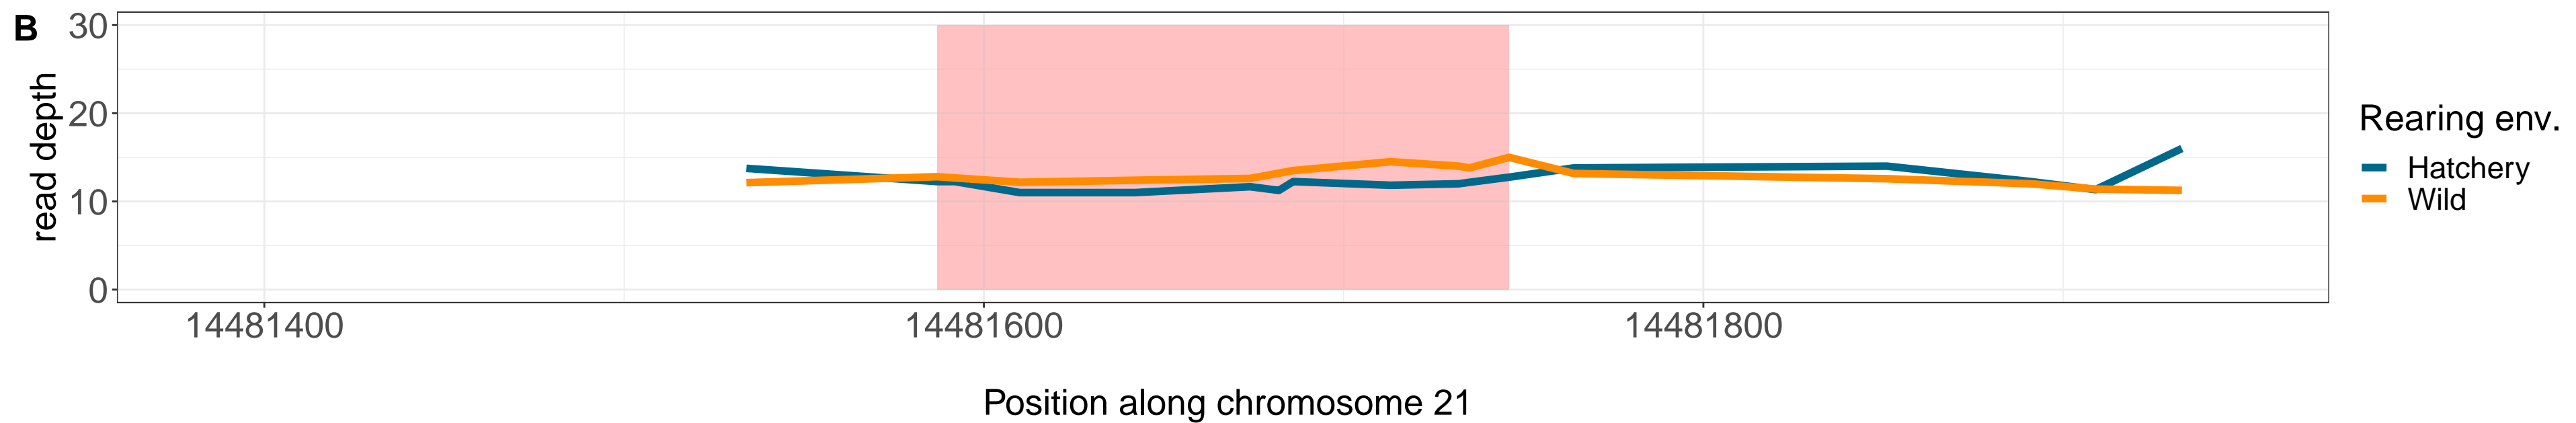

Position along chromosome 21

# DMR\_160

XM\_020460555.1

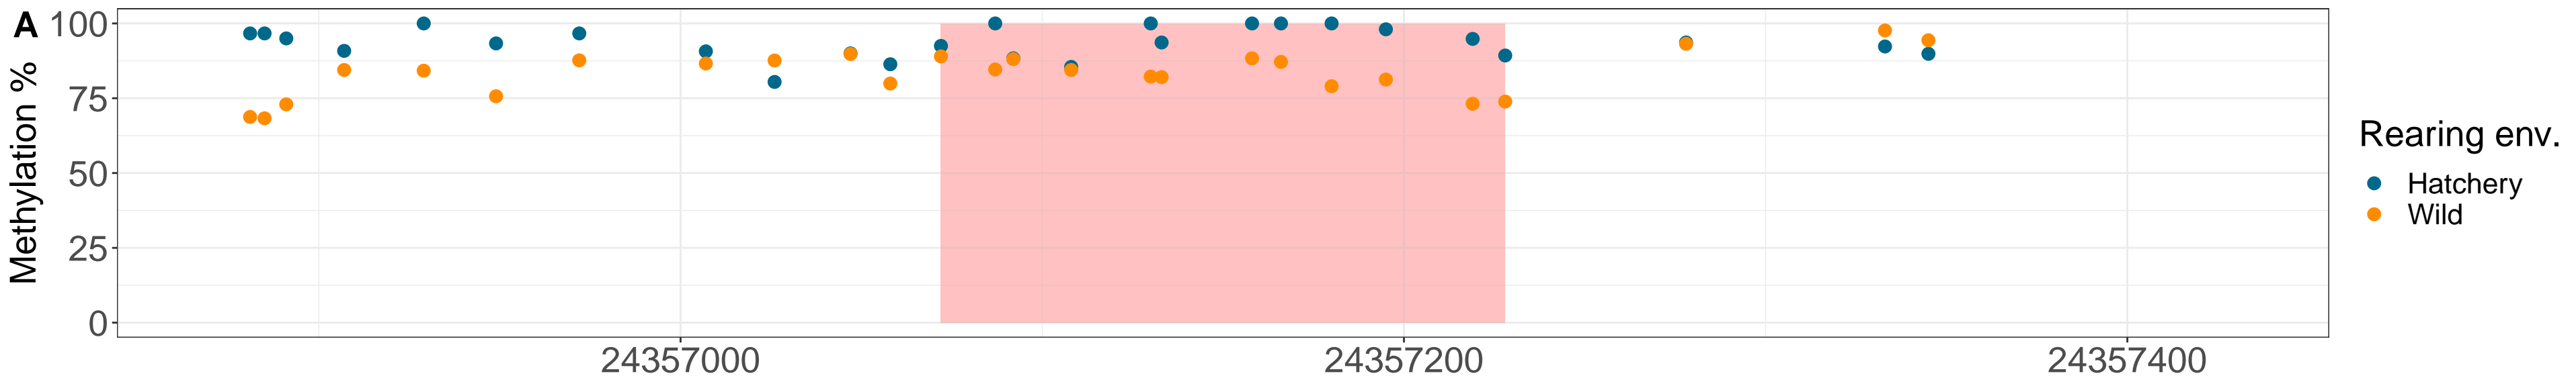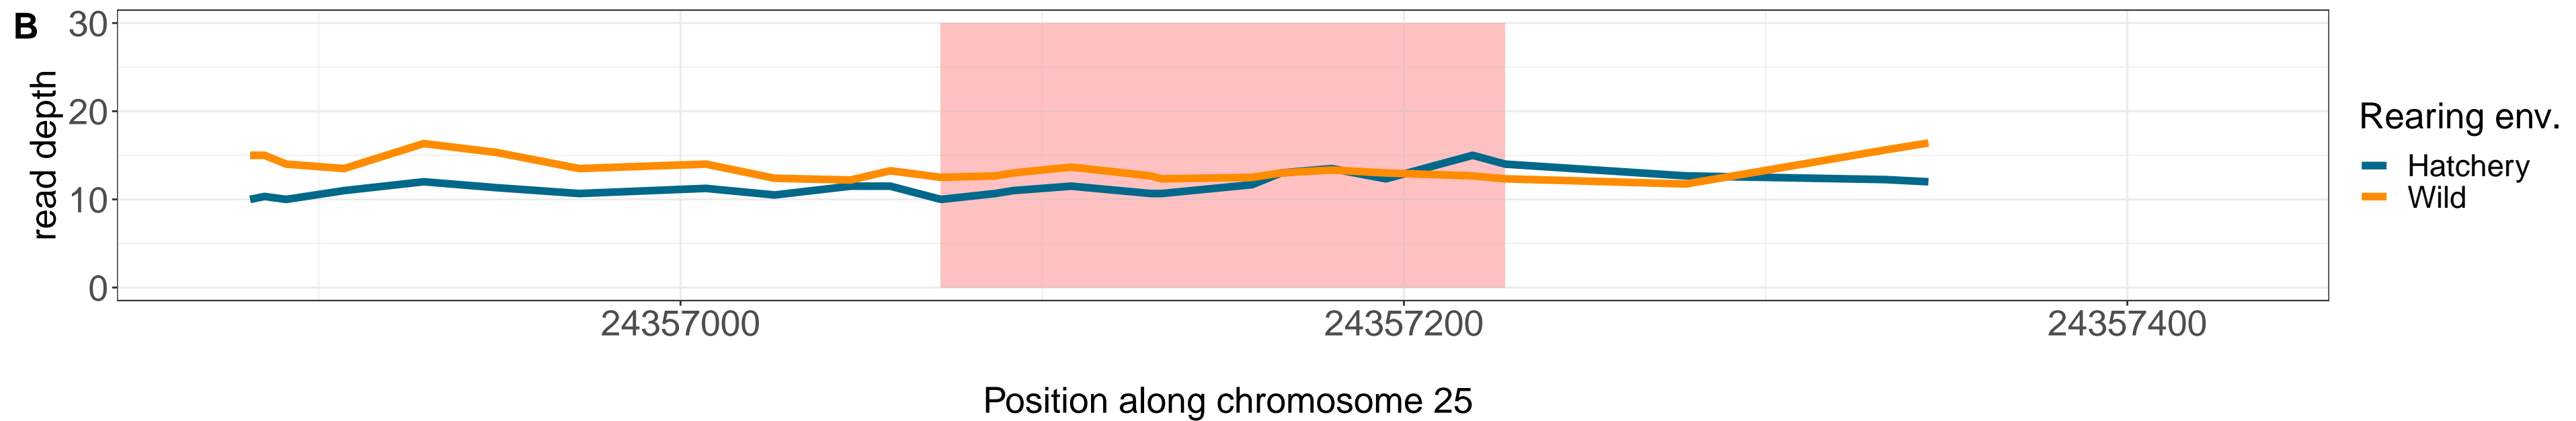

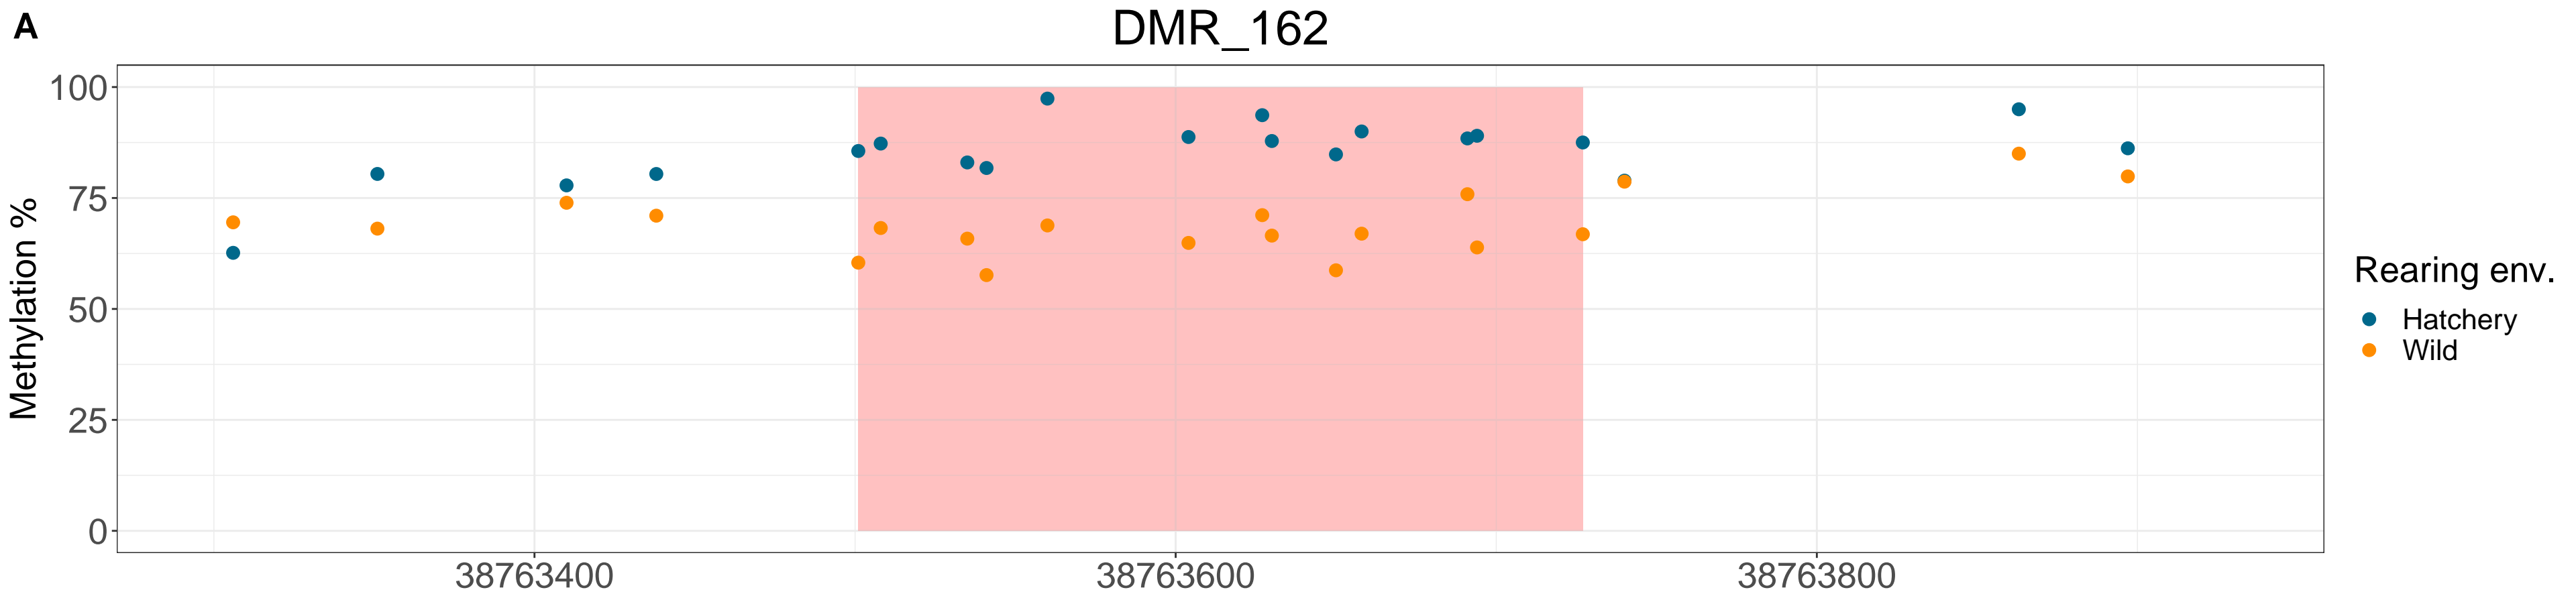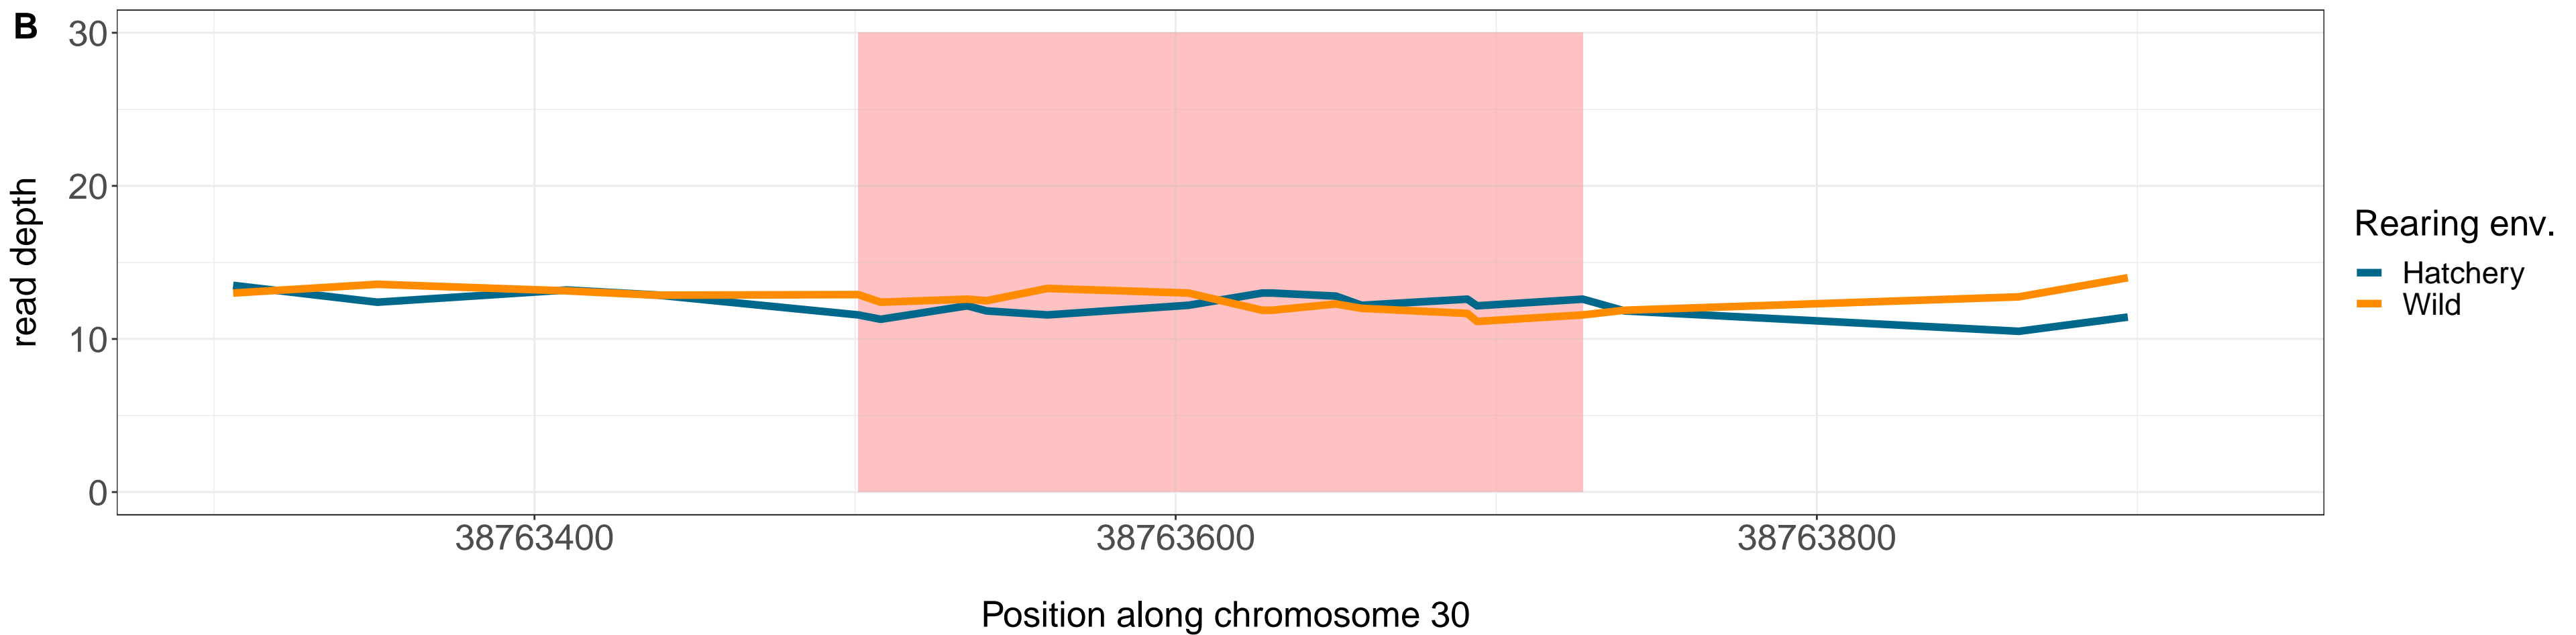



# DMR\_163

XM\_020500105.1

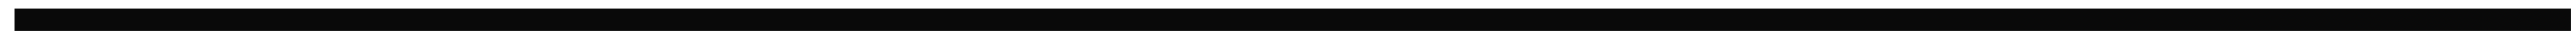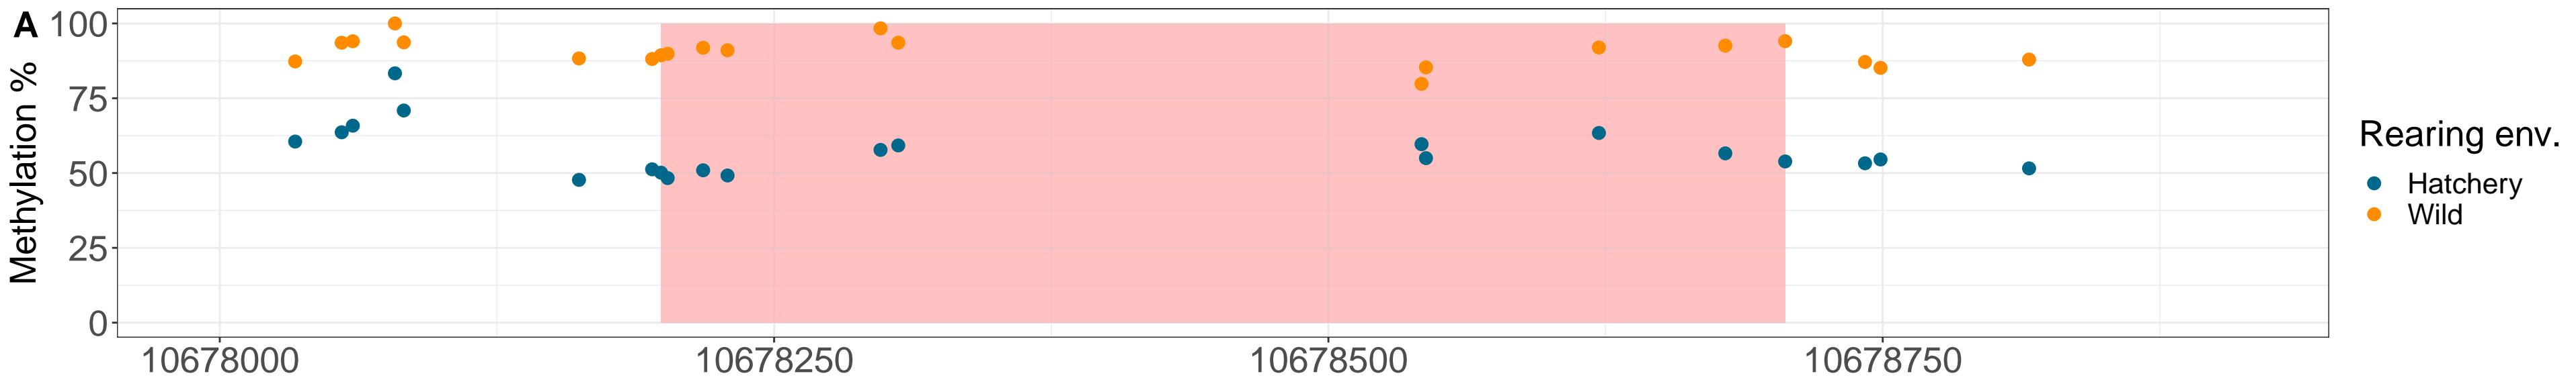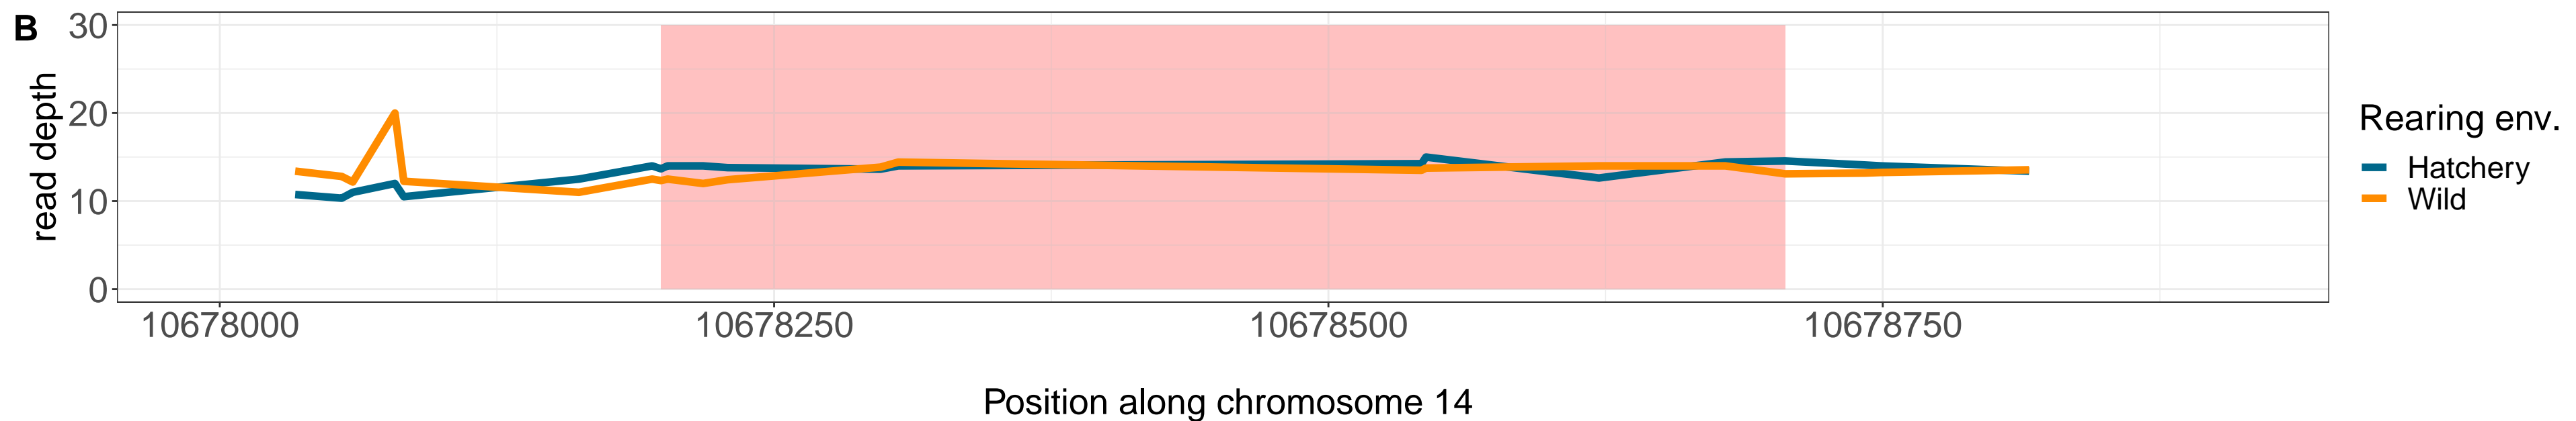

Position along chromosome 14

# DMR\_164

XM\_020485832.1

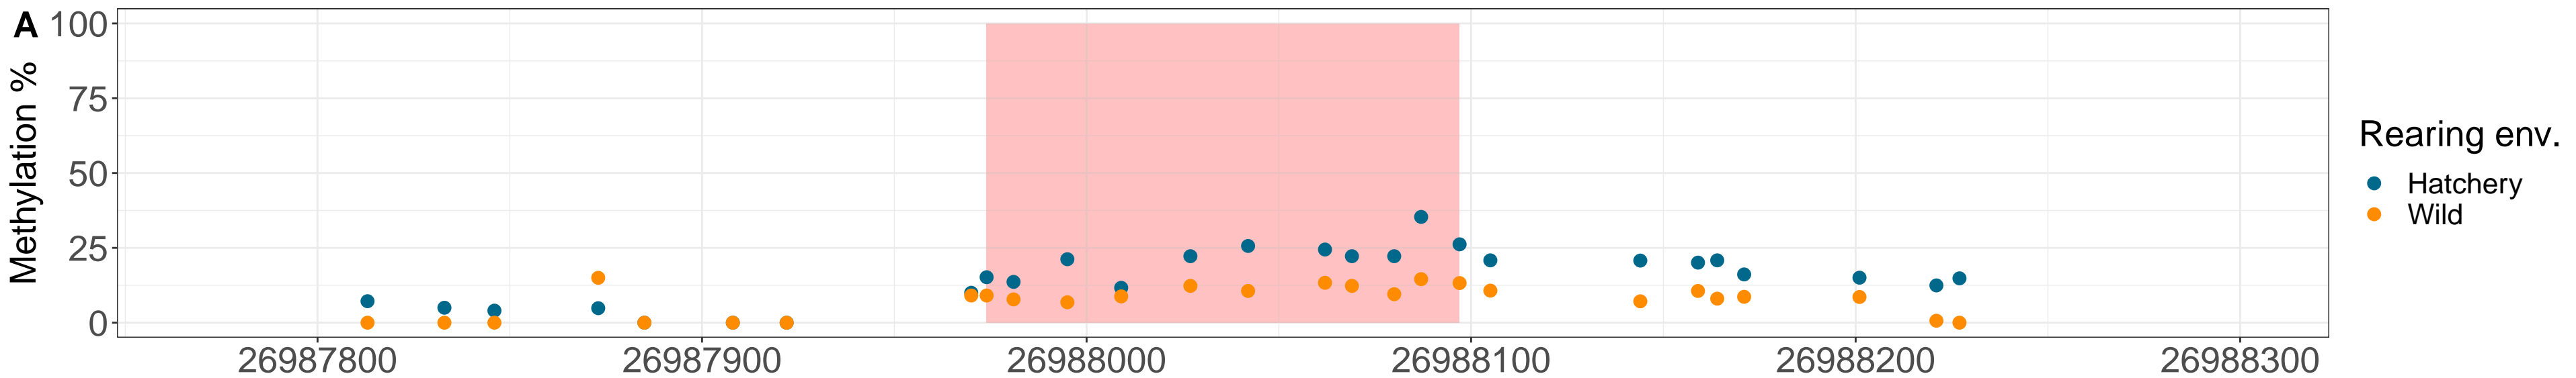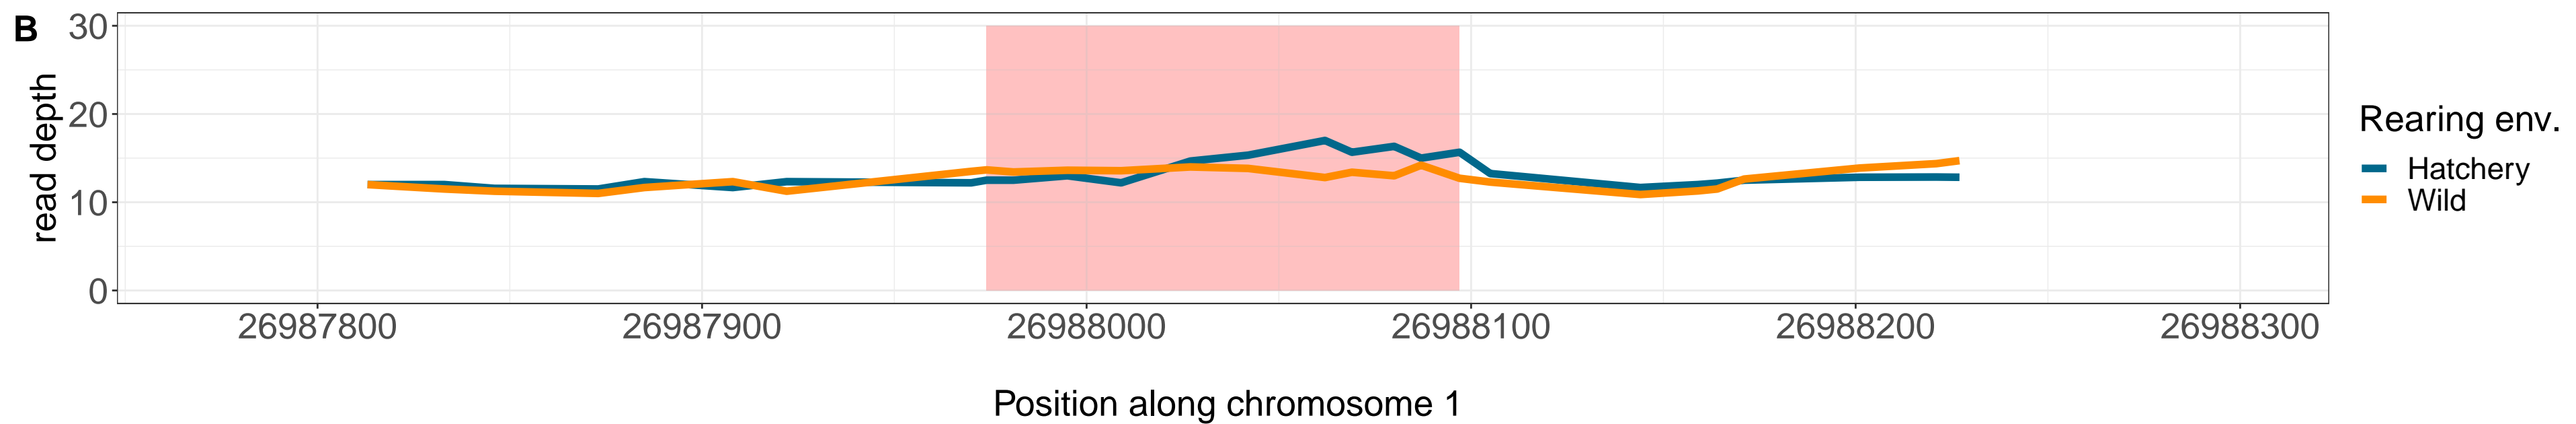

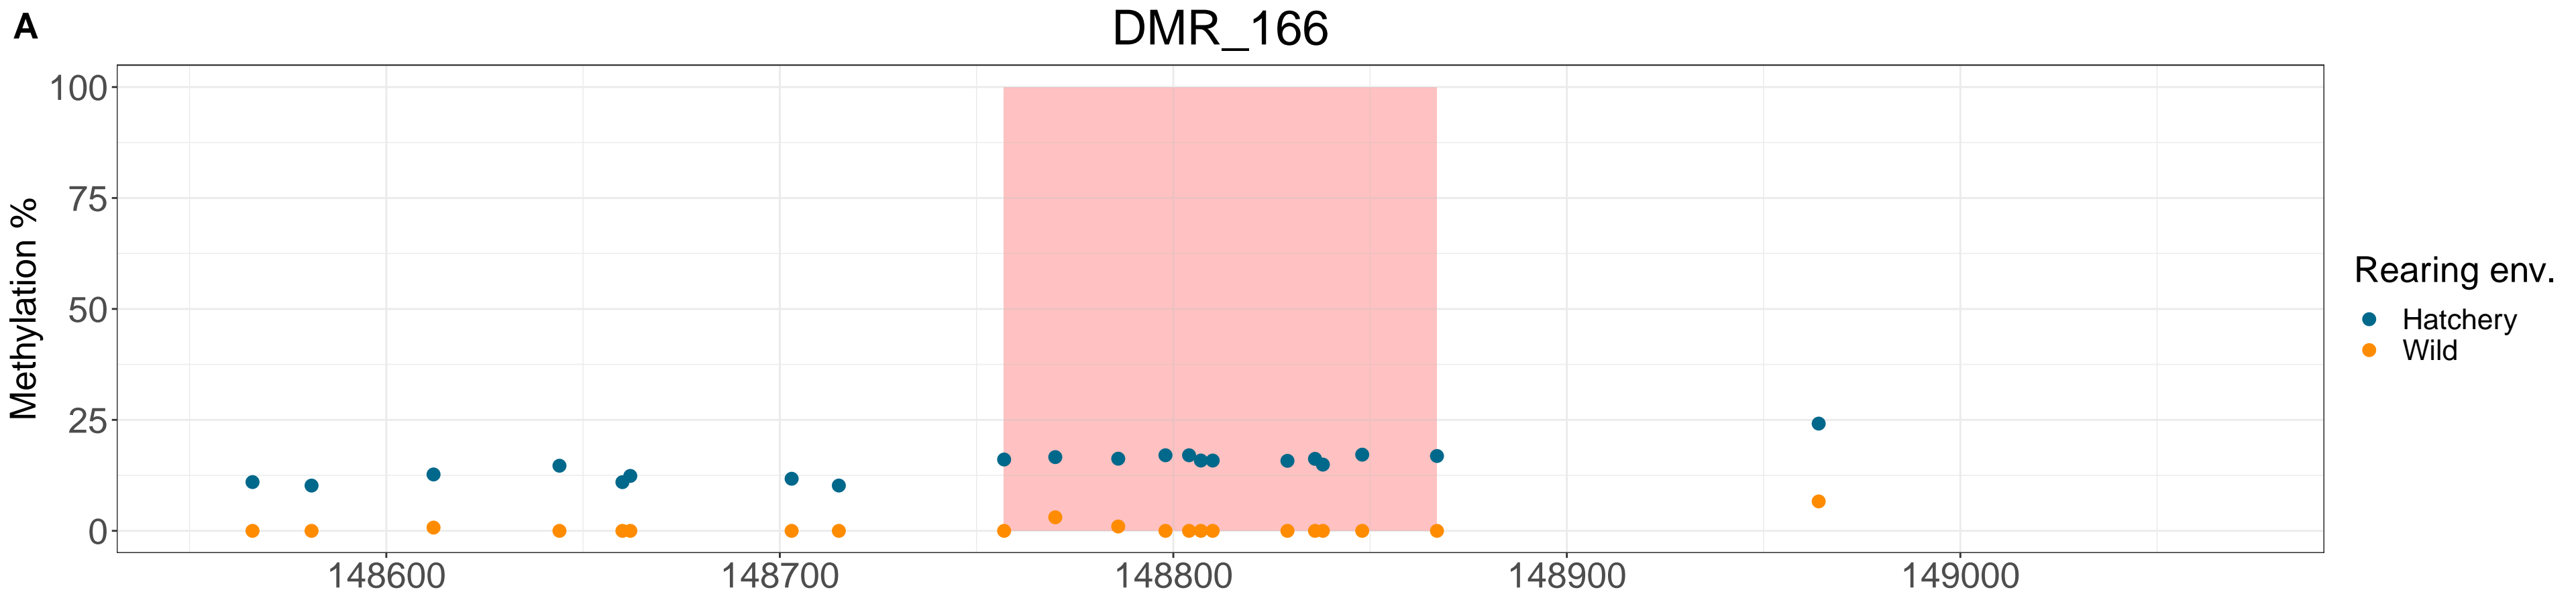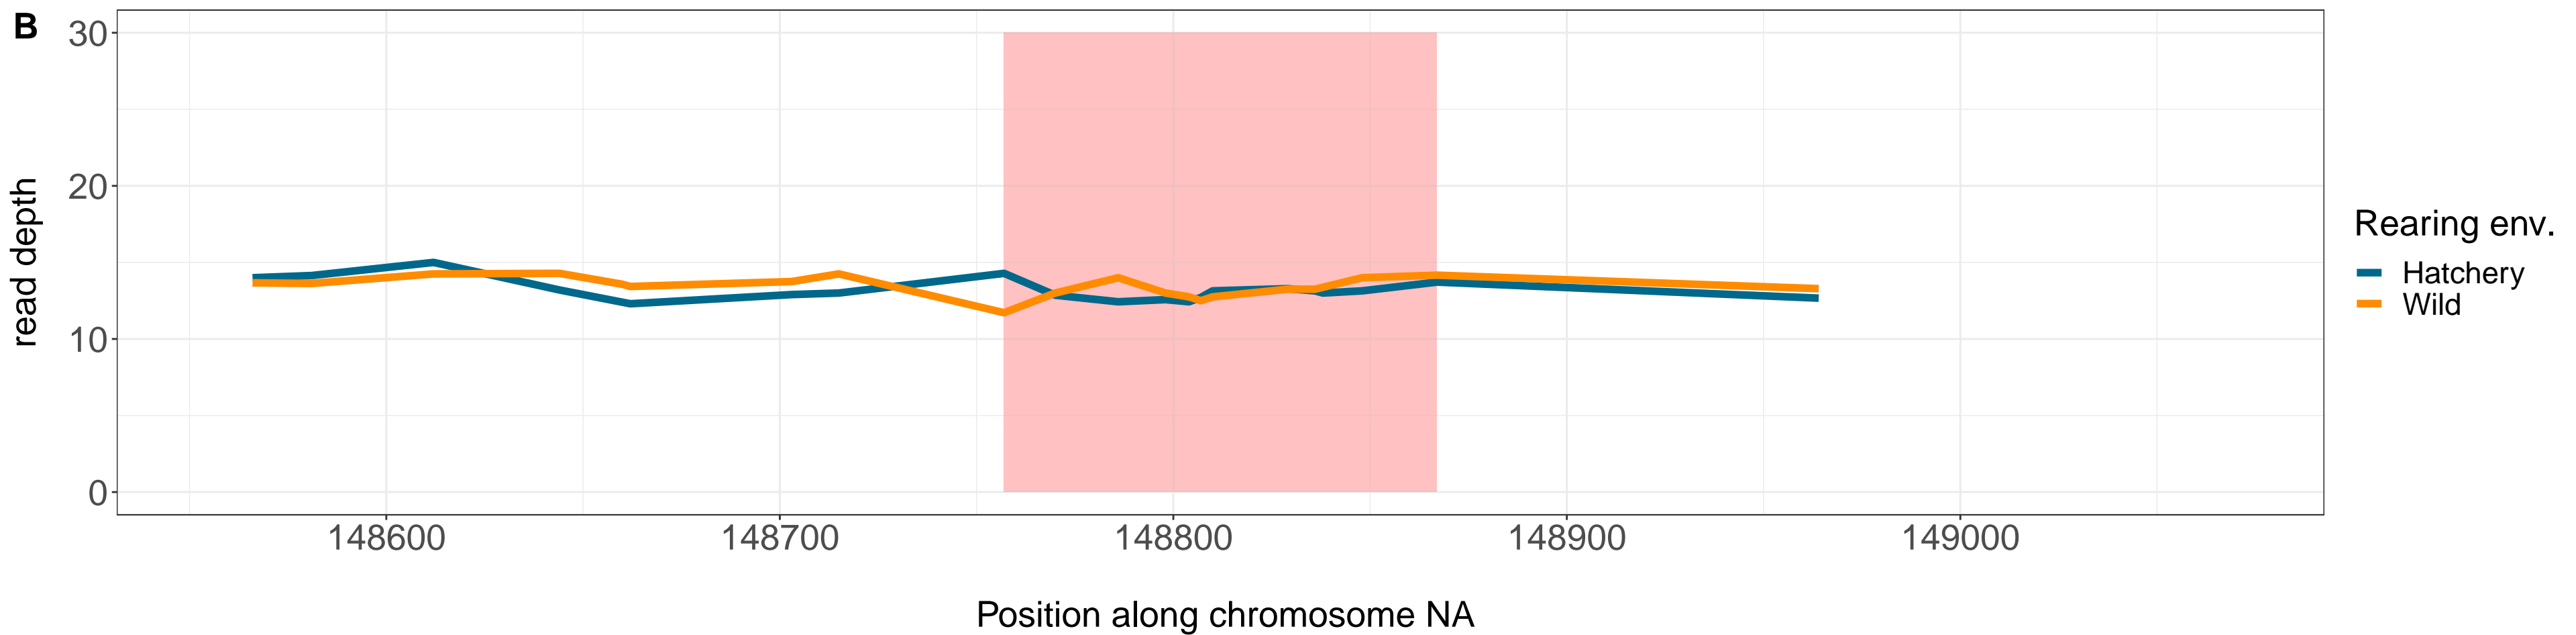

**A**

## DMR\_167

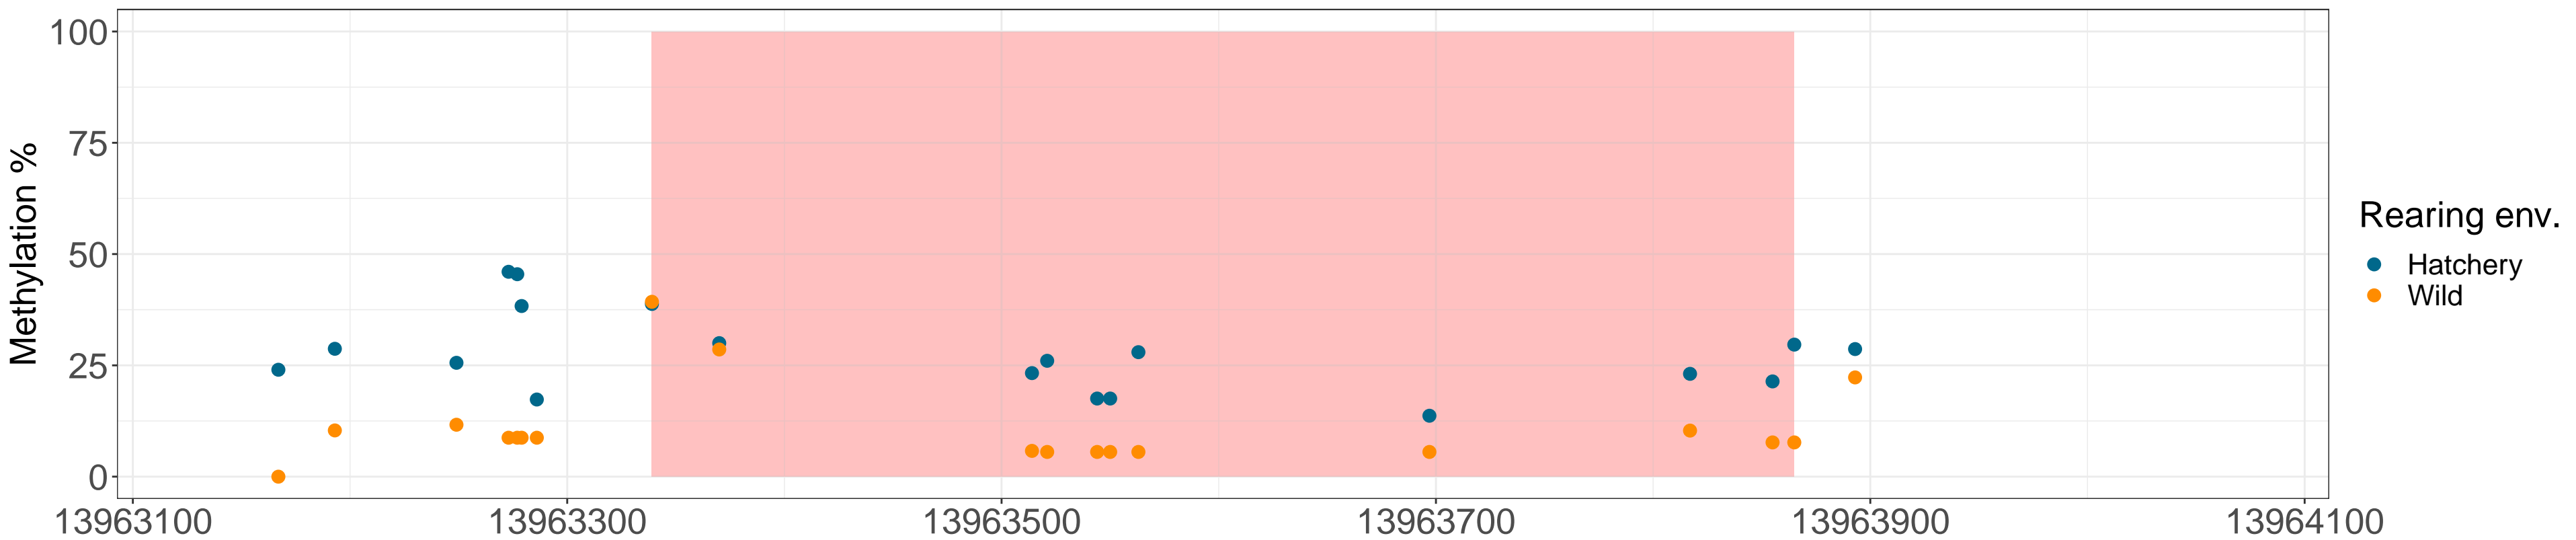**B**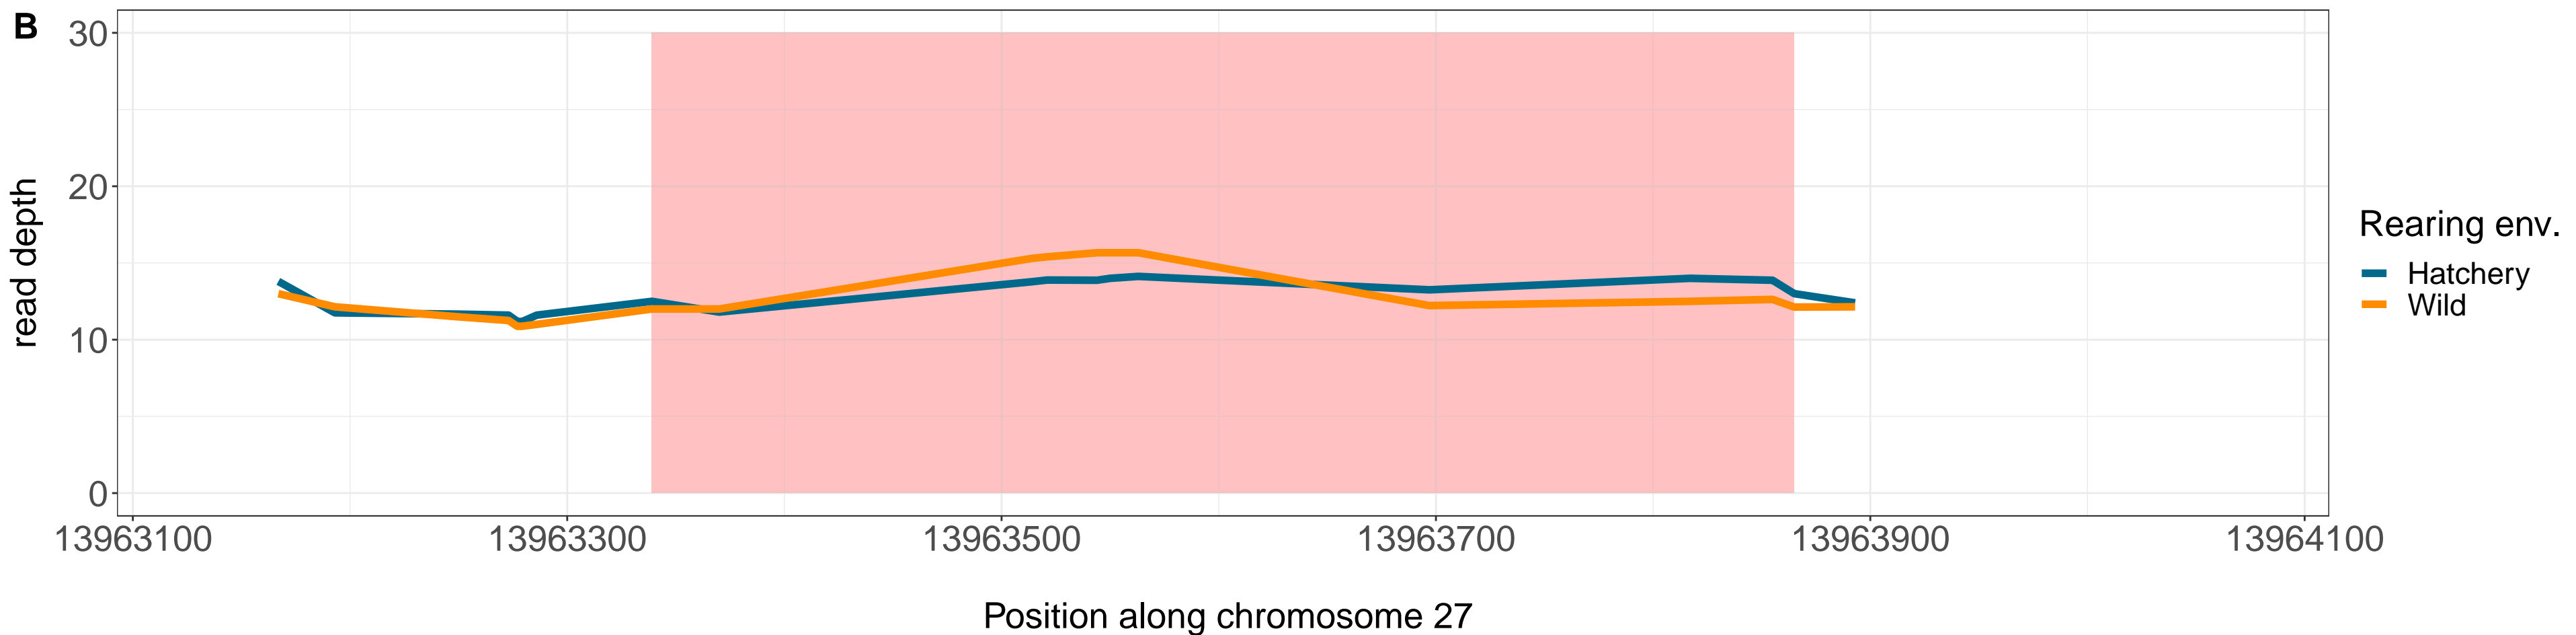

# DMR\_168

XM\_020487402.1

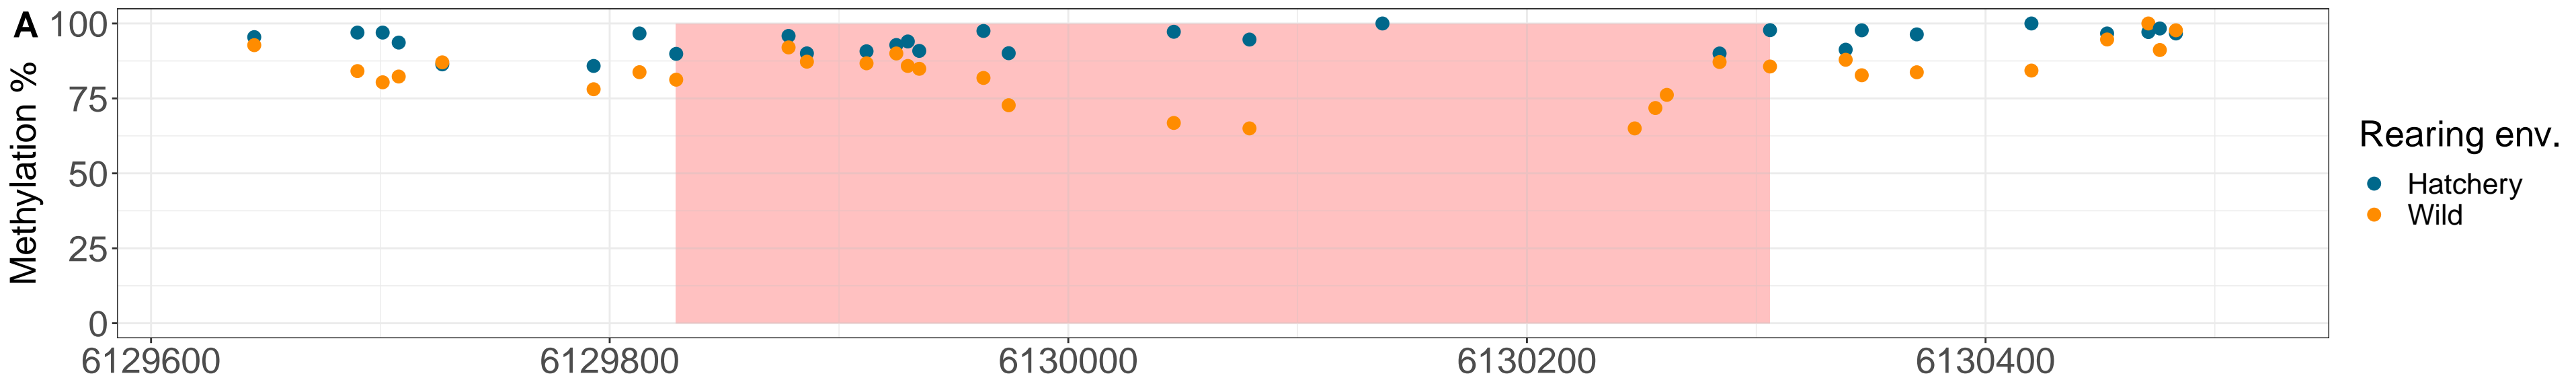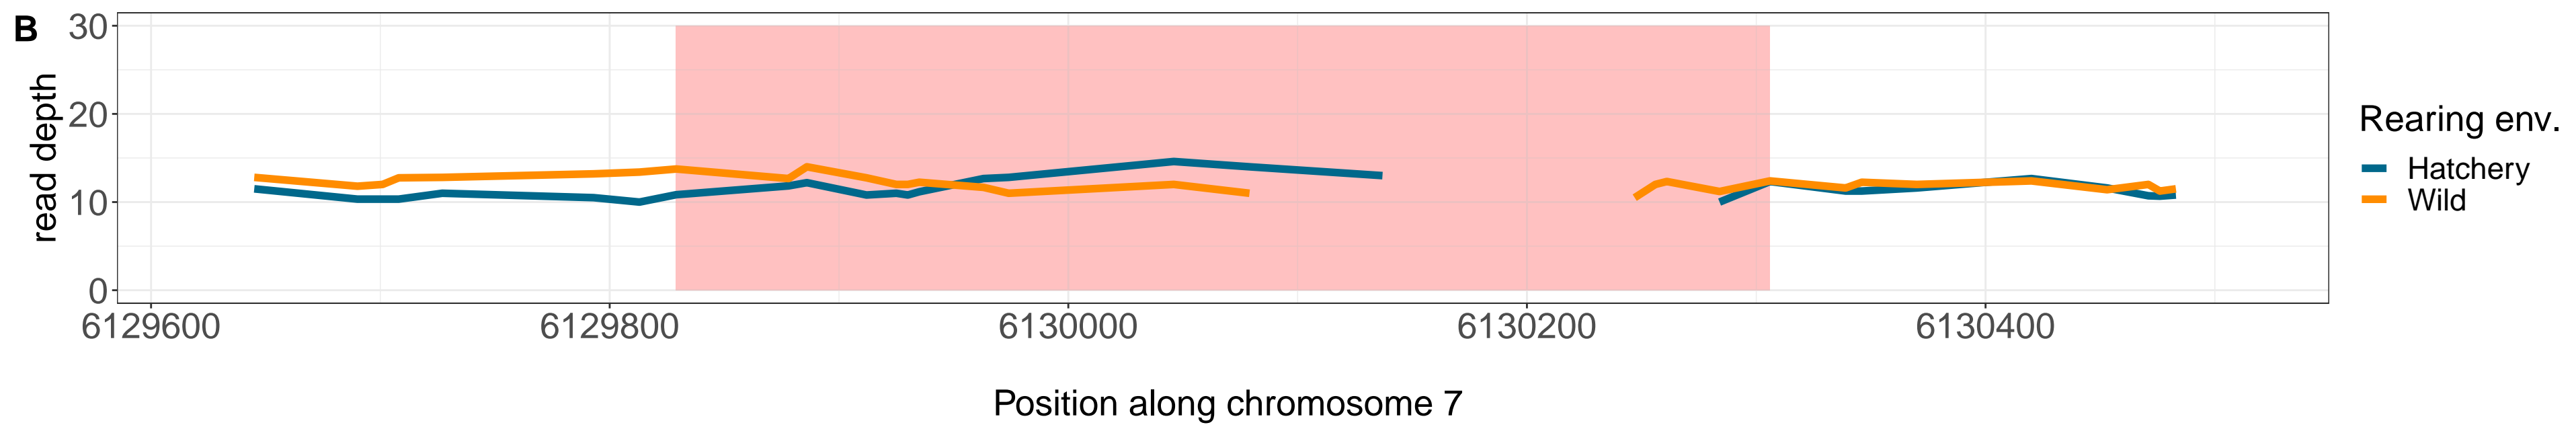

**A**

## DMR\_169

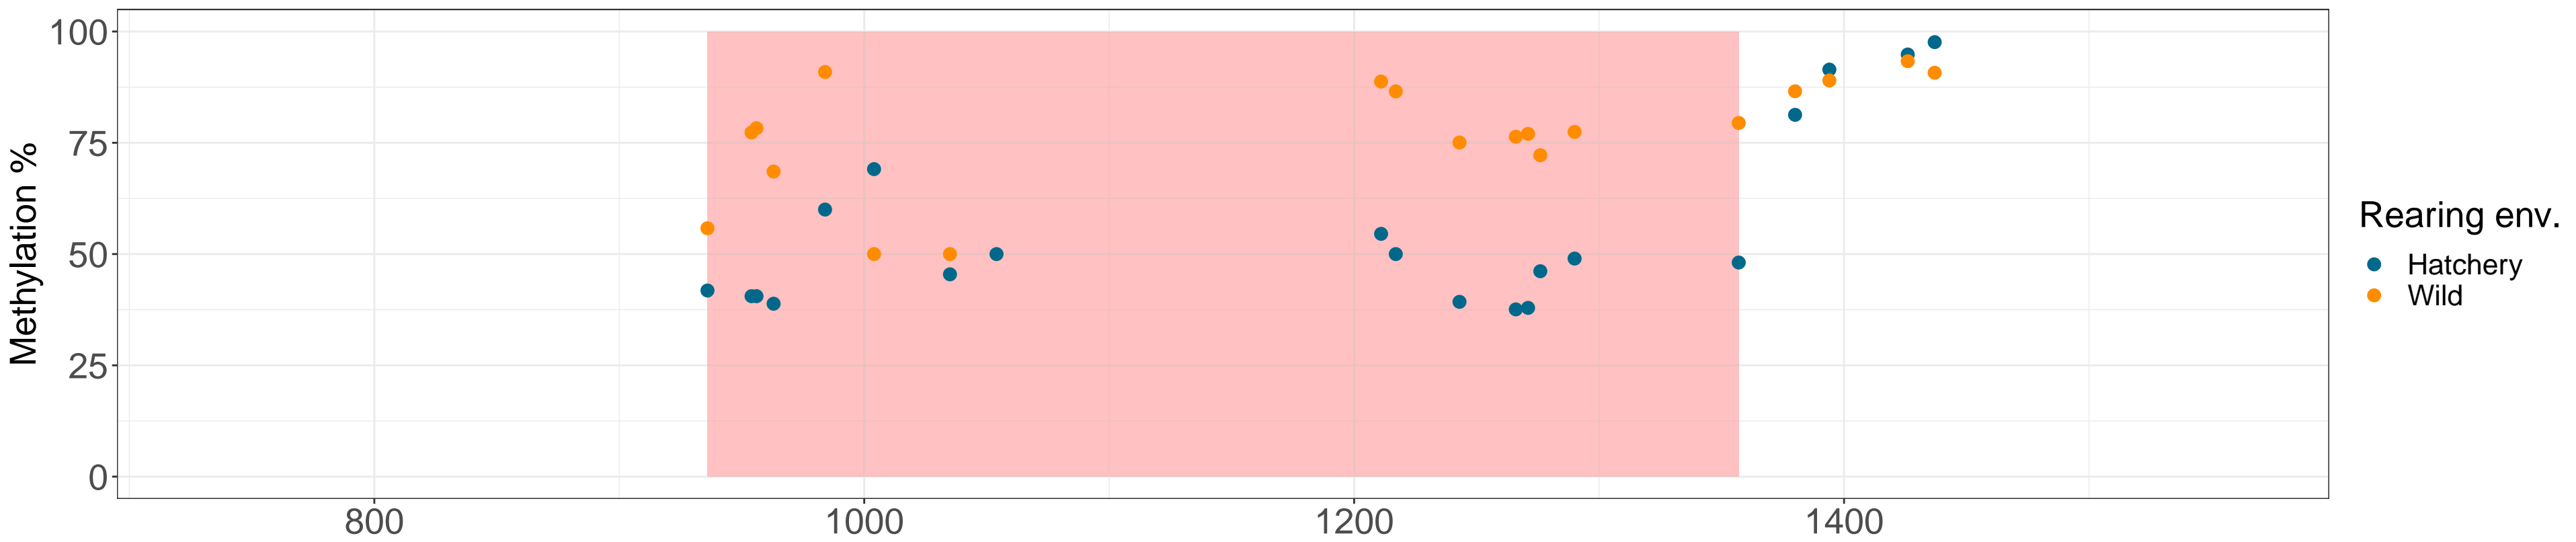**B**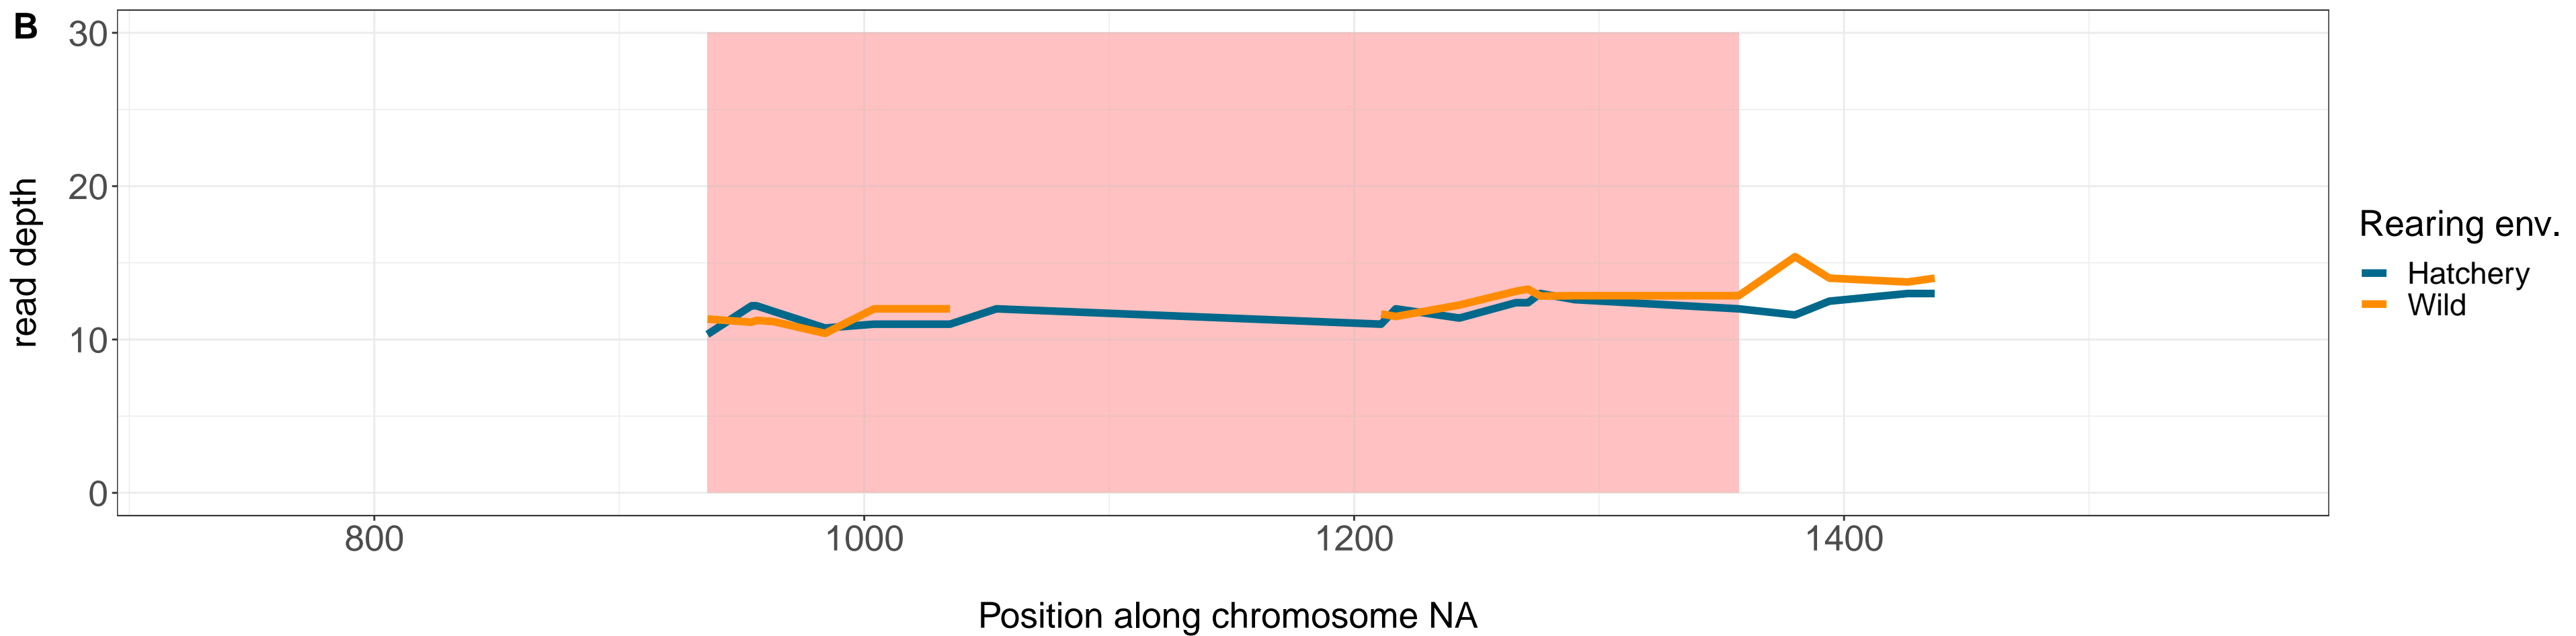

**A**

## DMR\_170

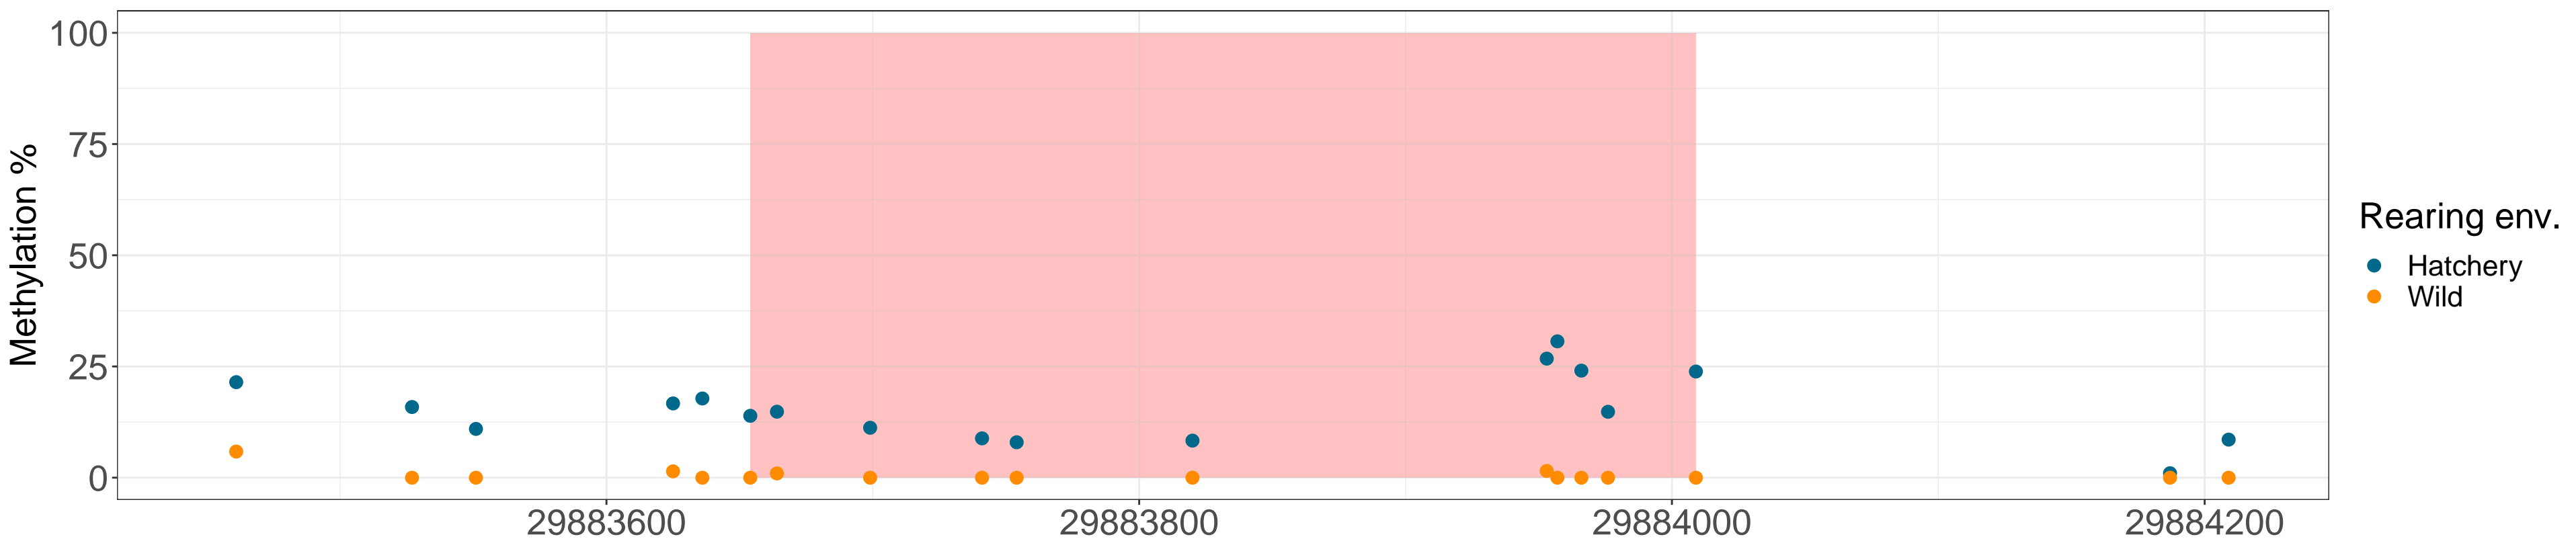**B**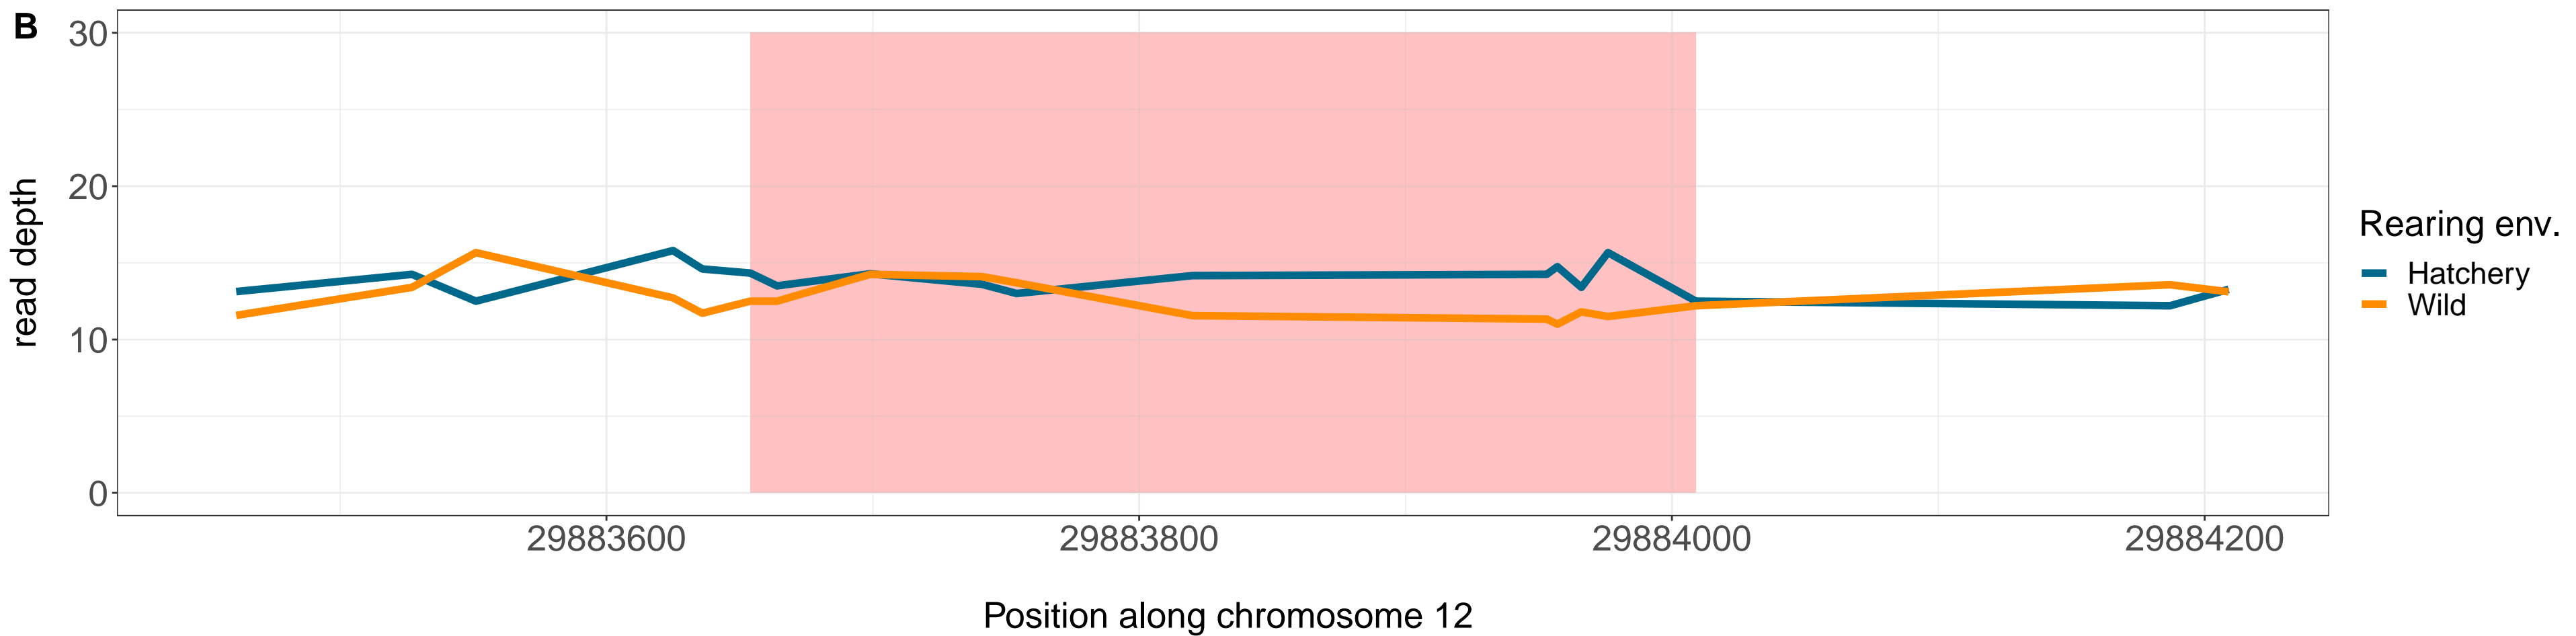

**A**

## DMR\_171

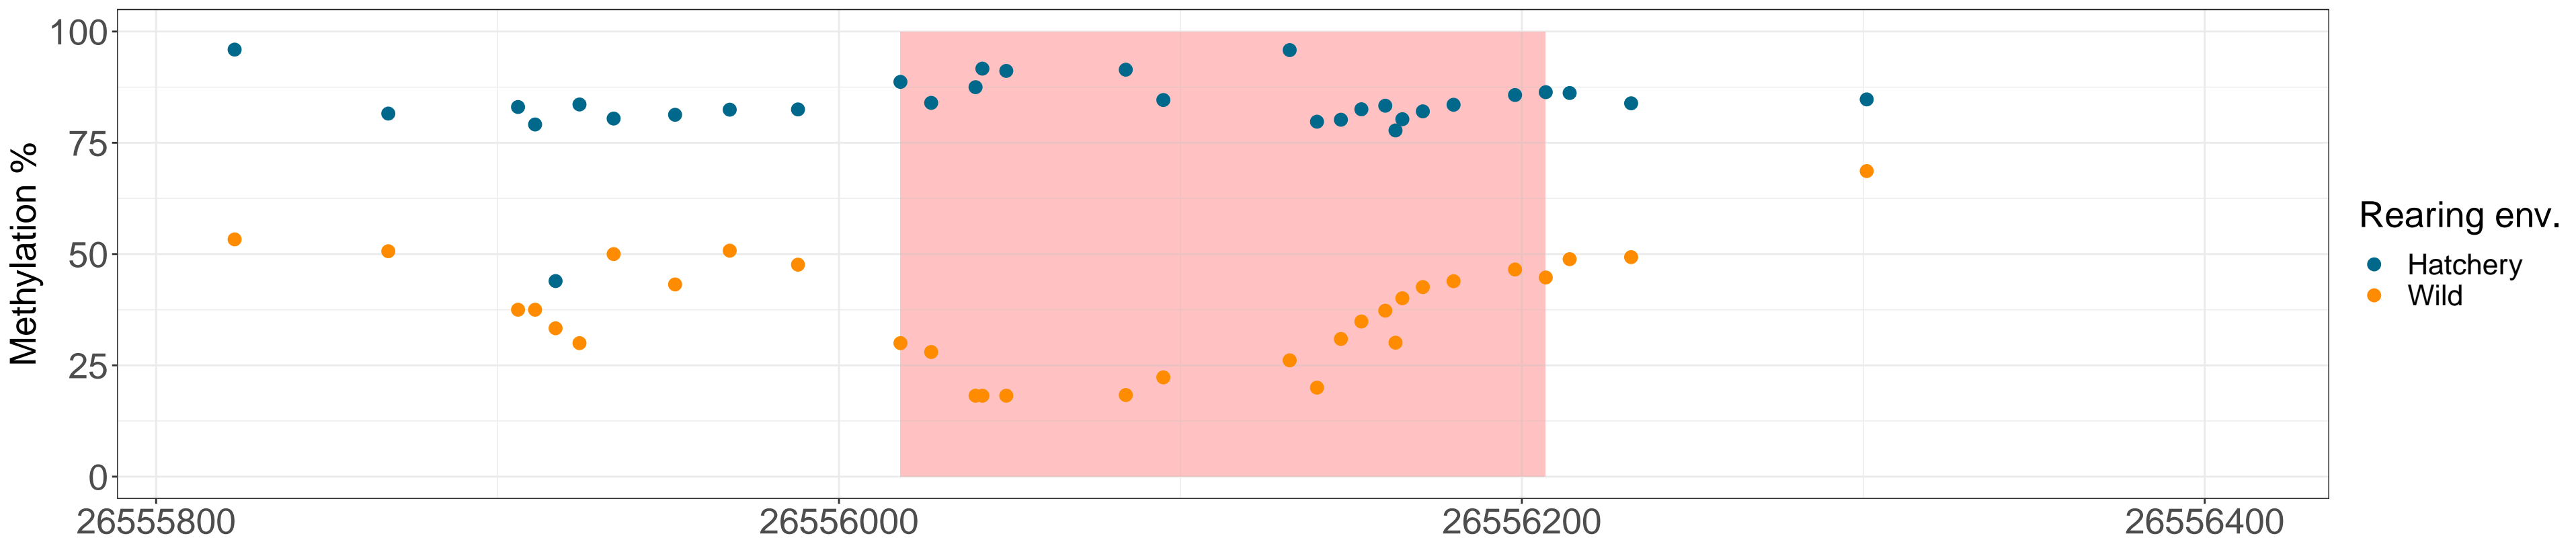**B**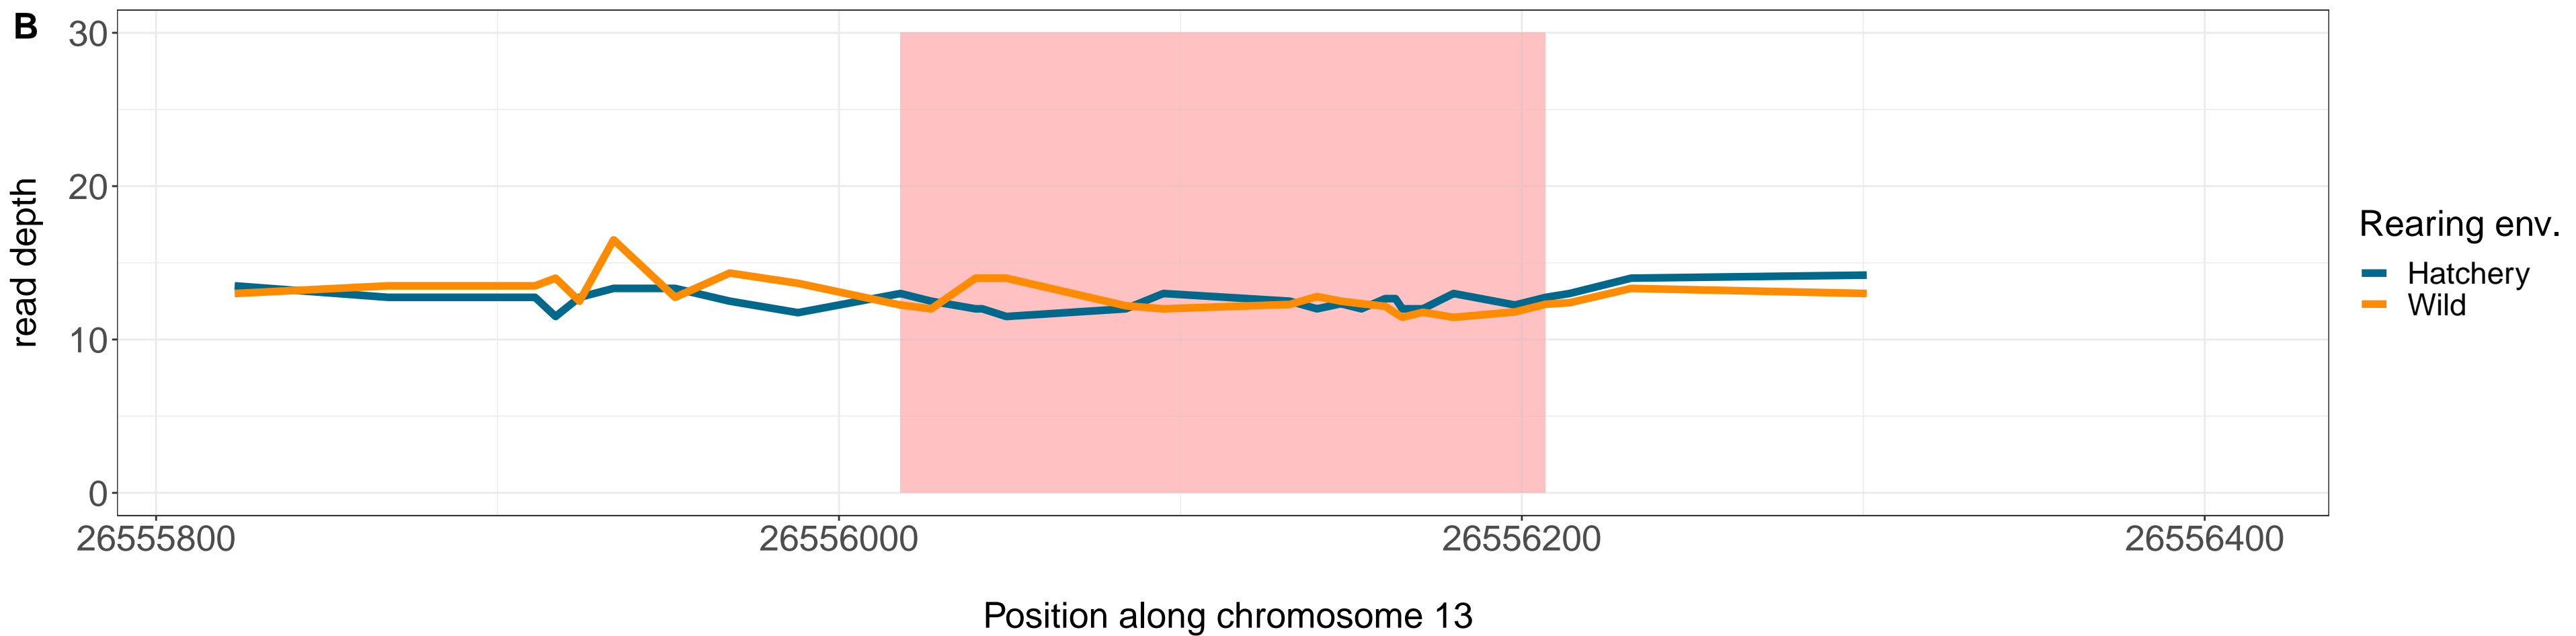



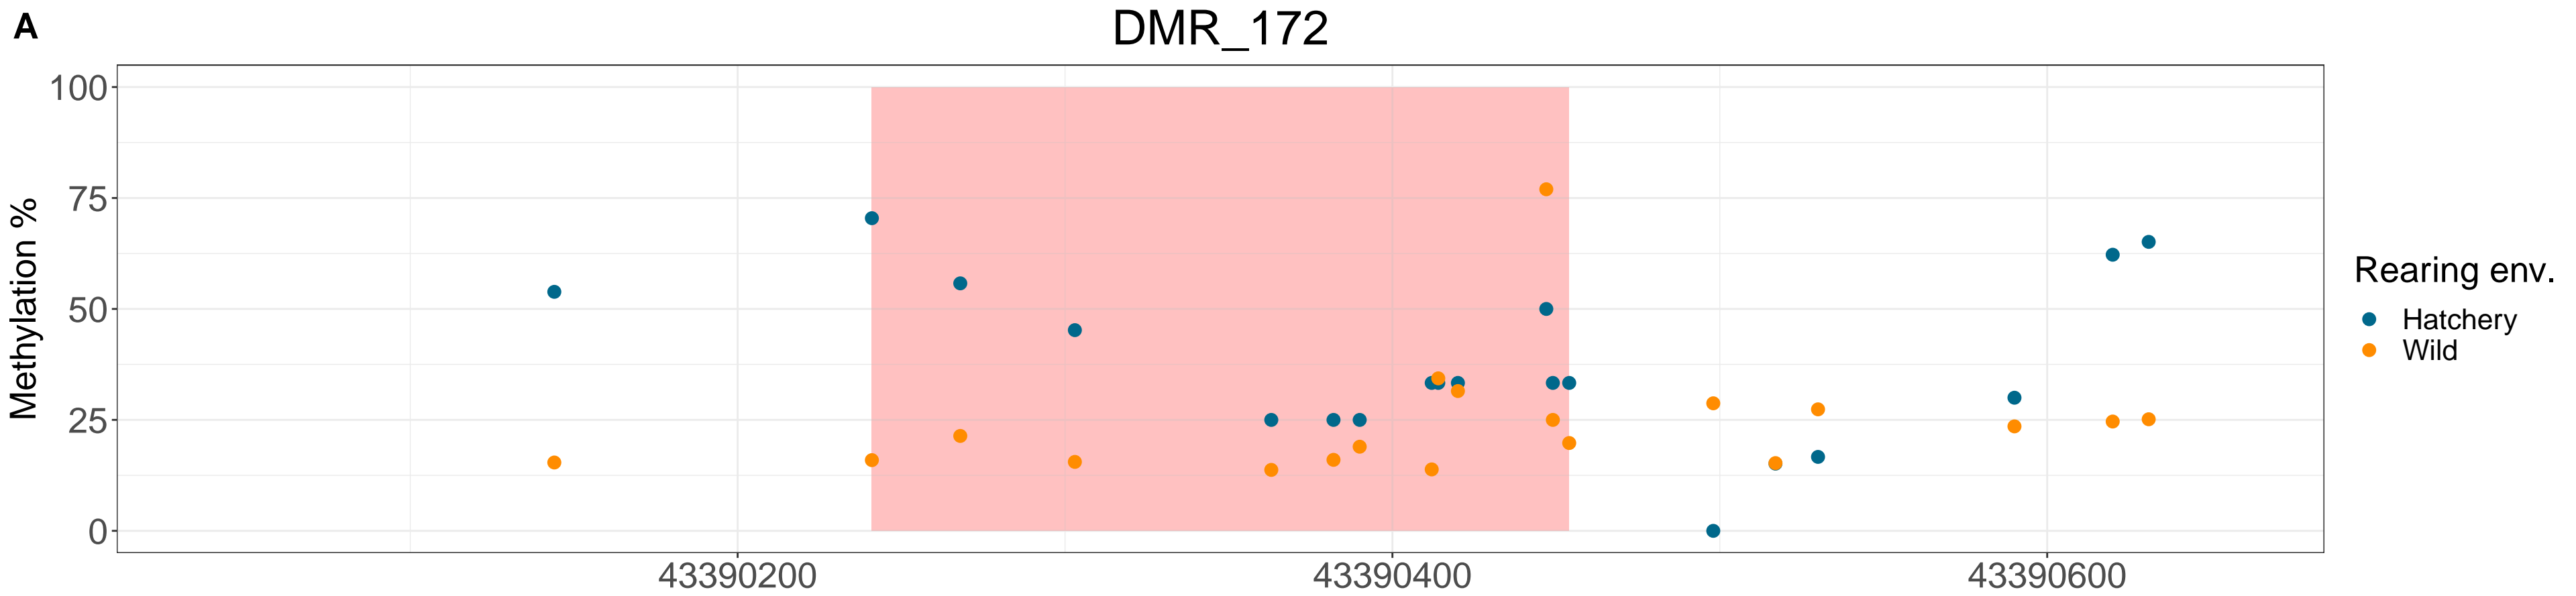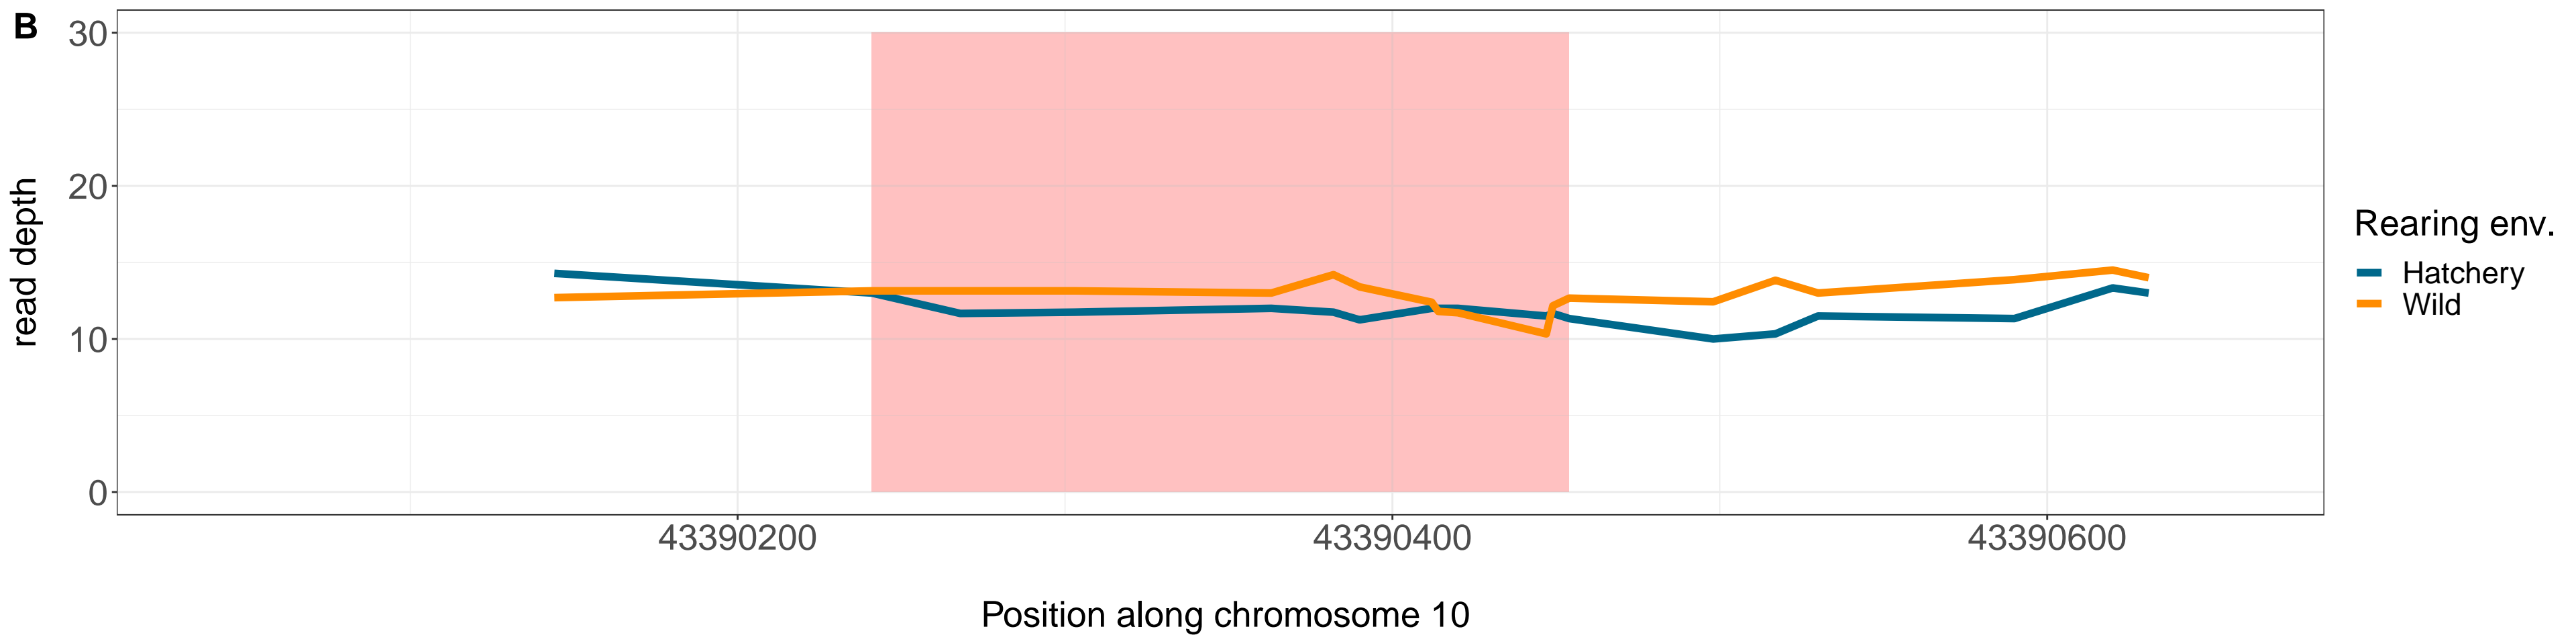

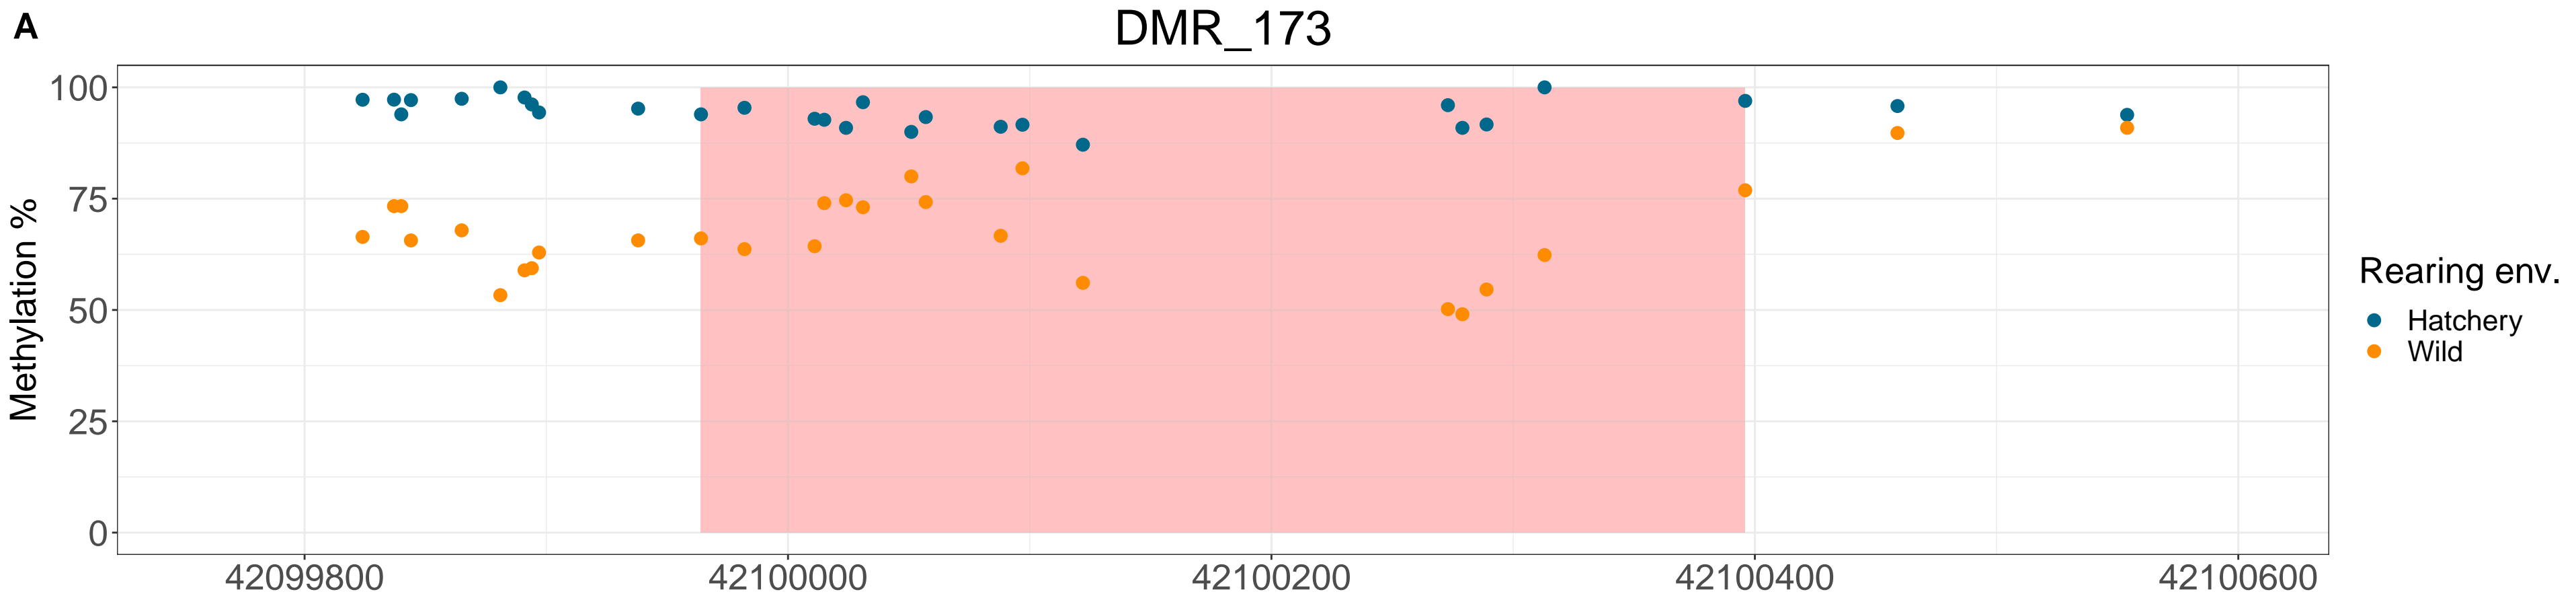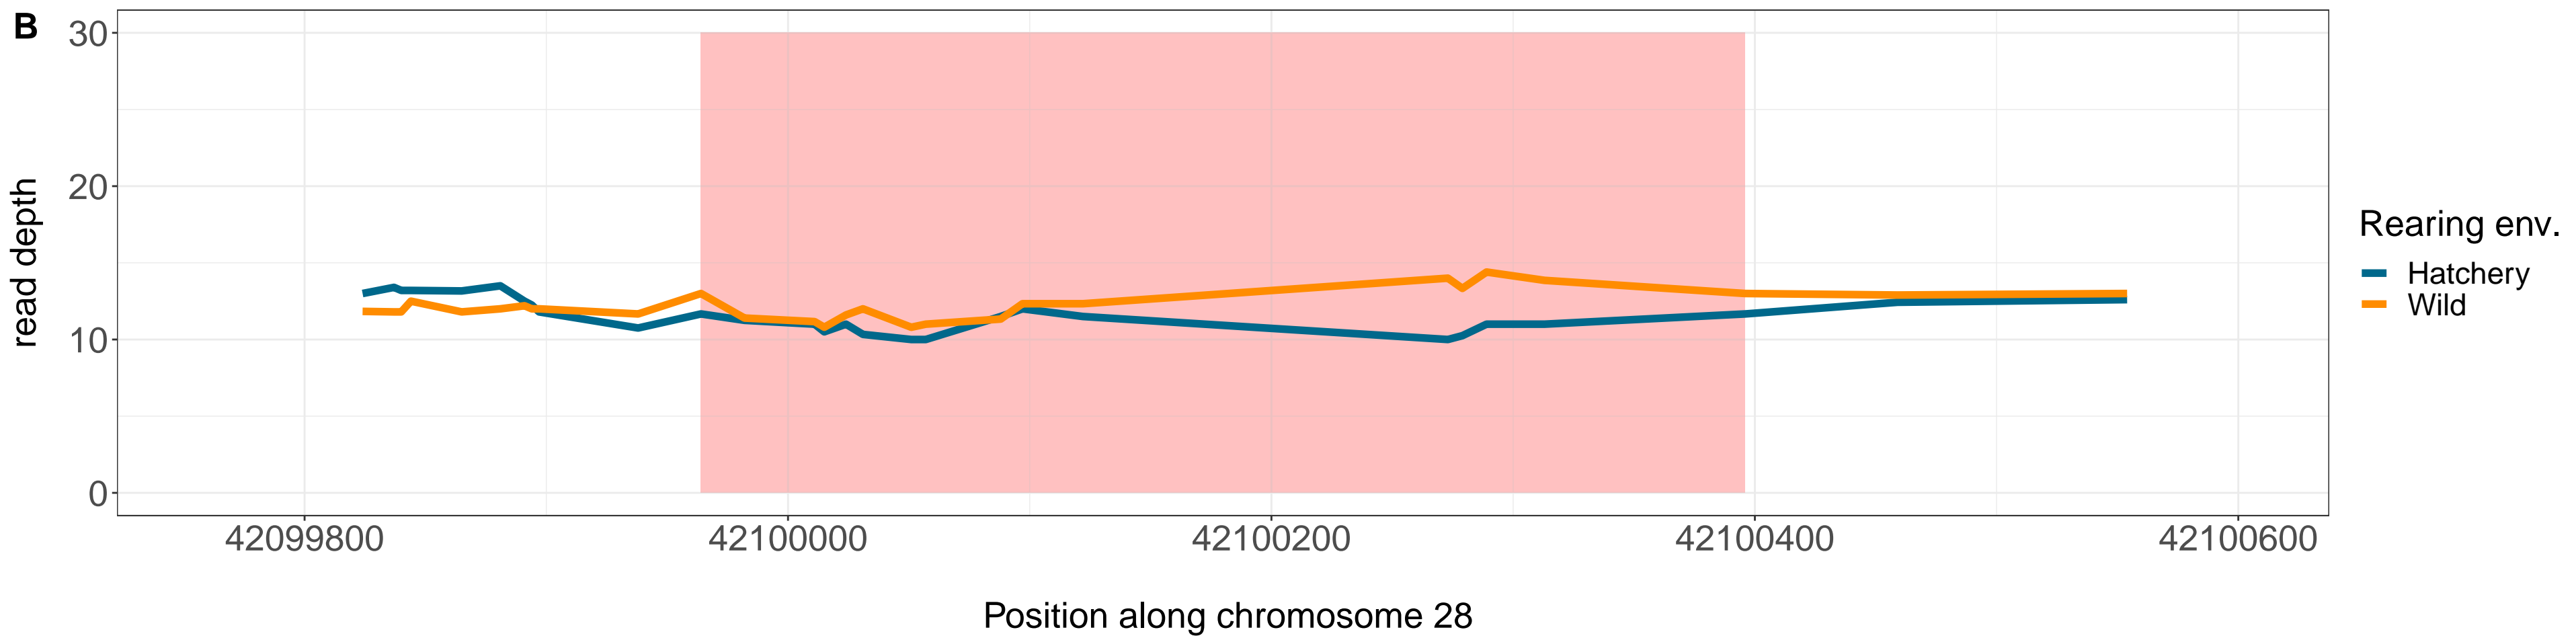

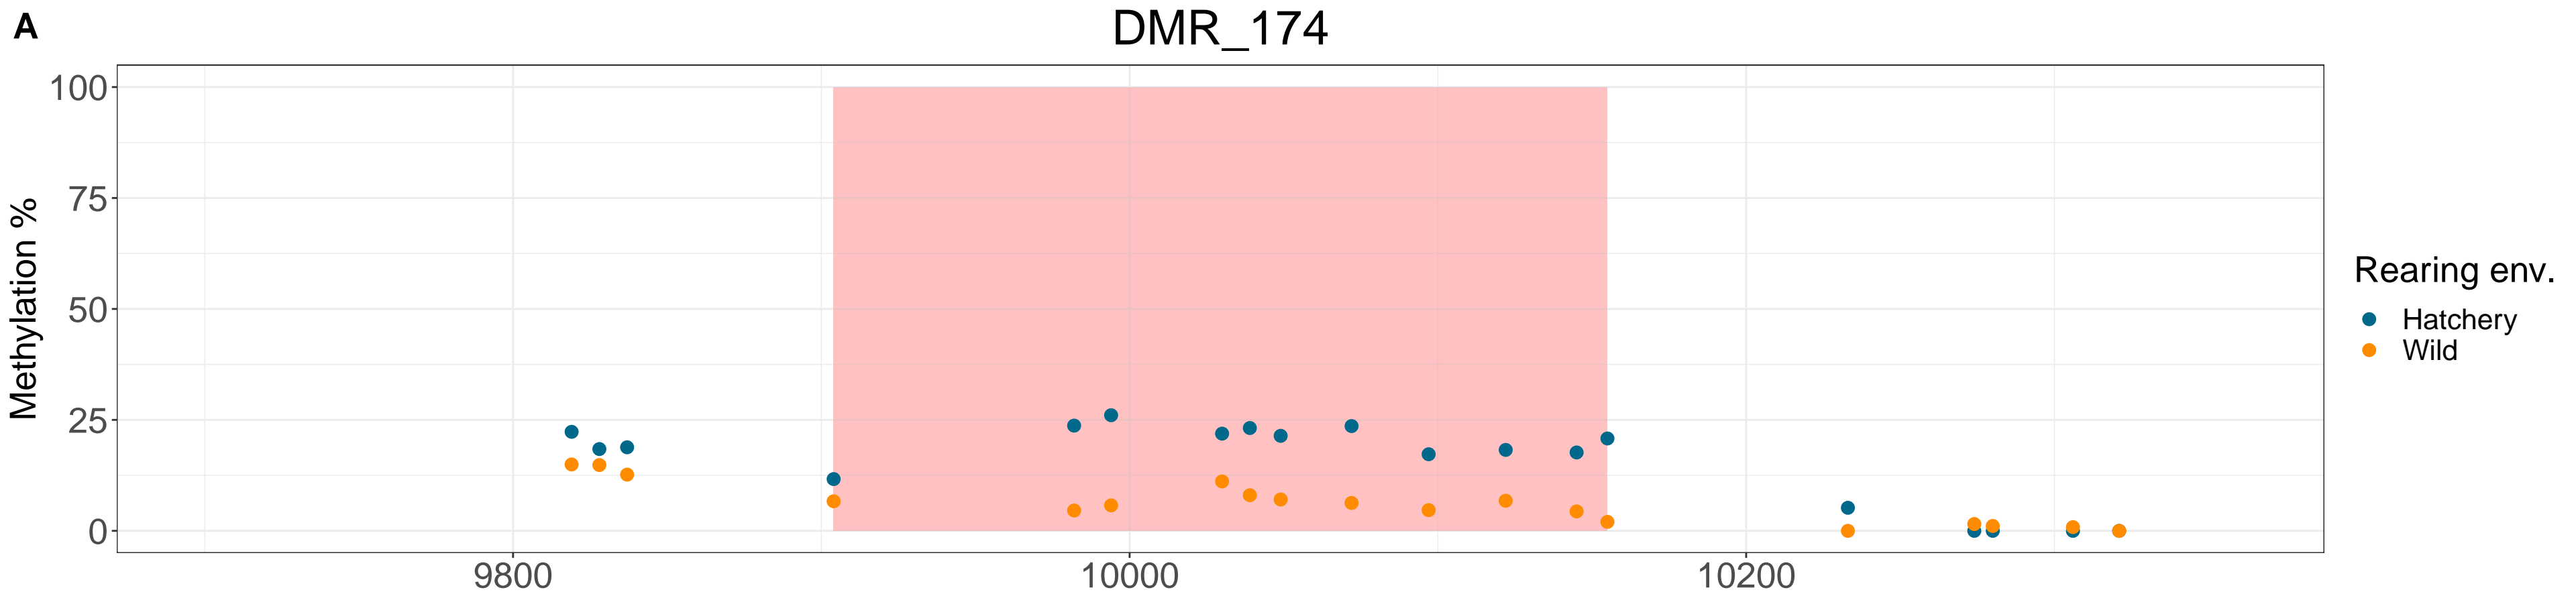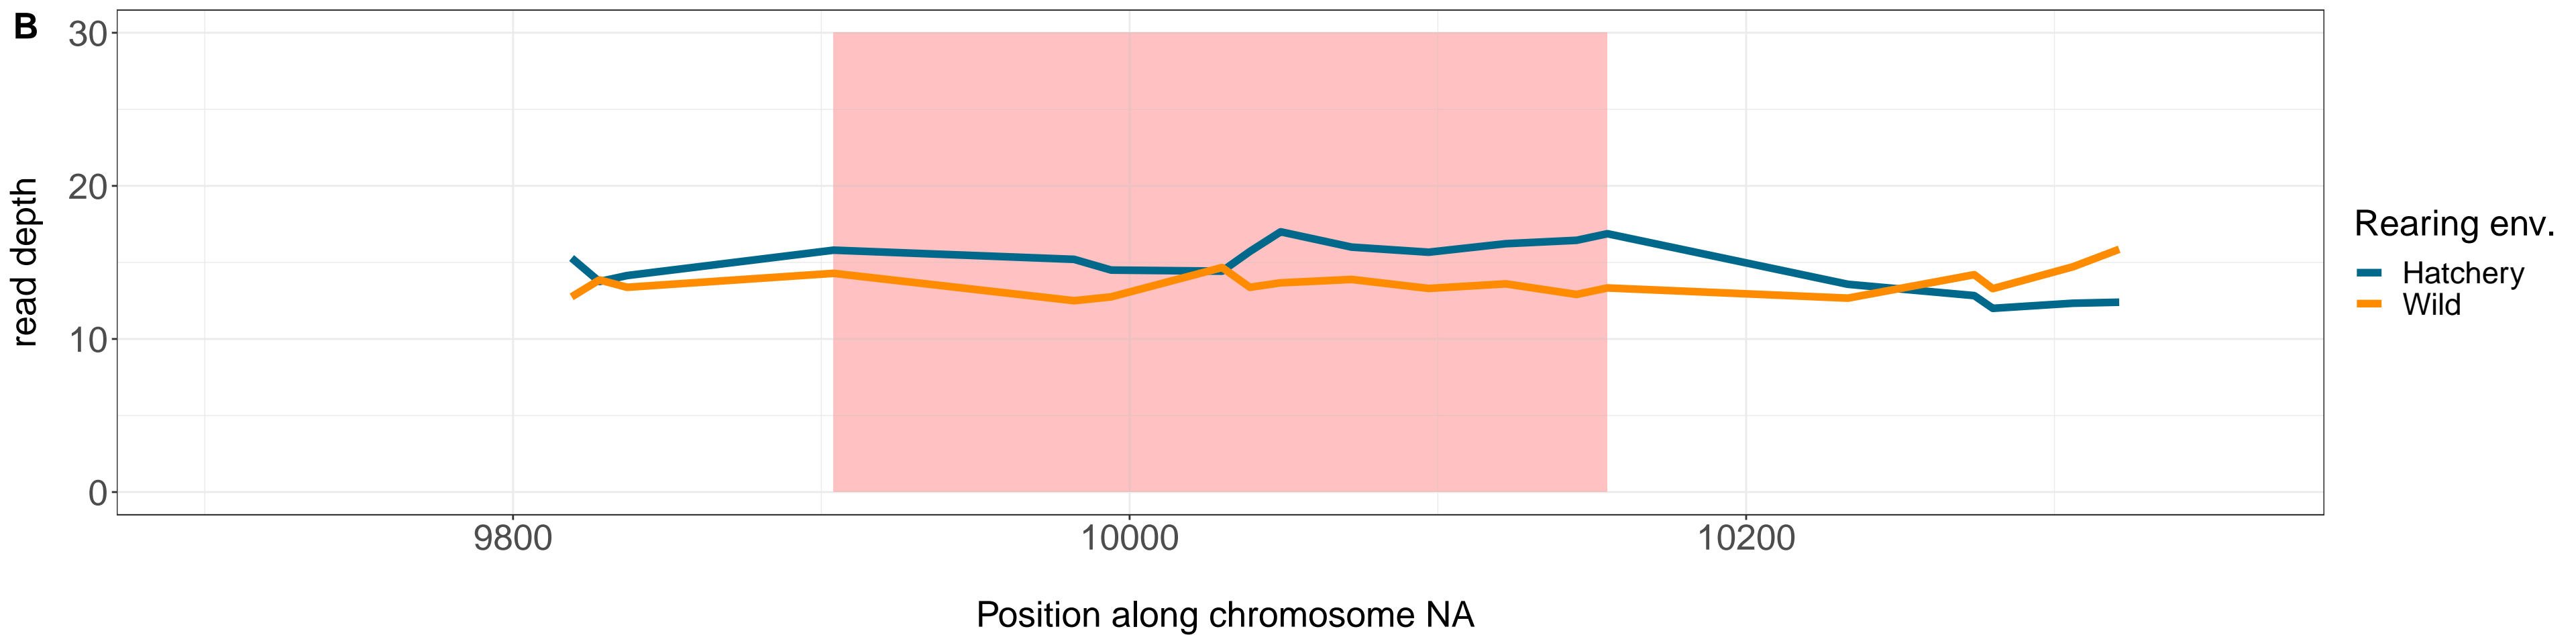

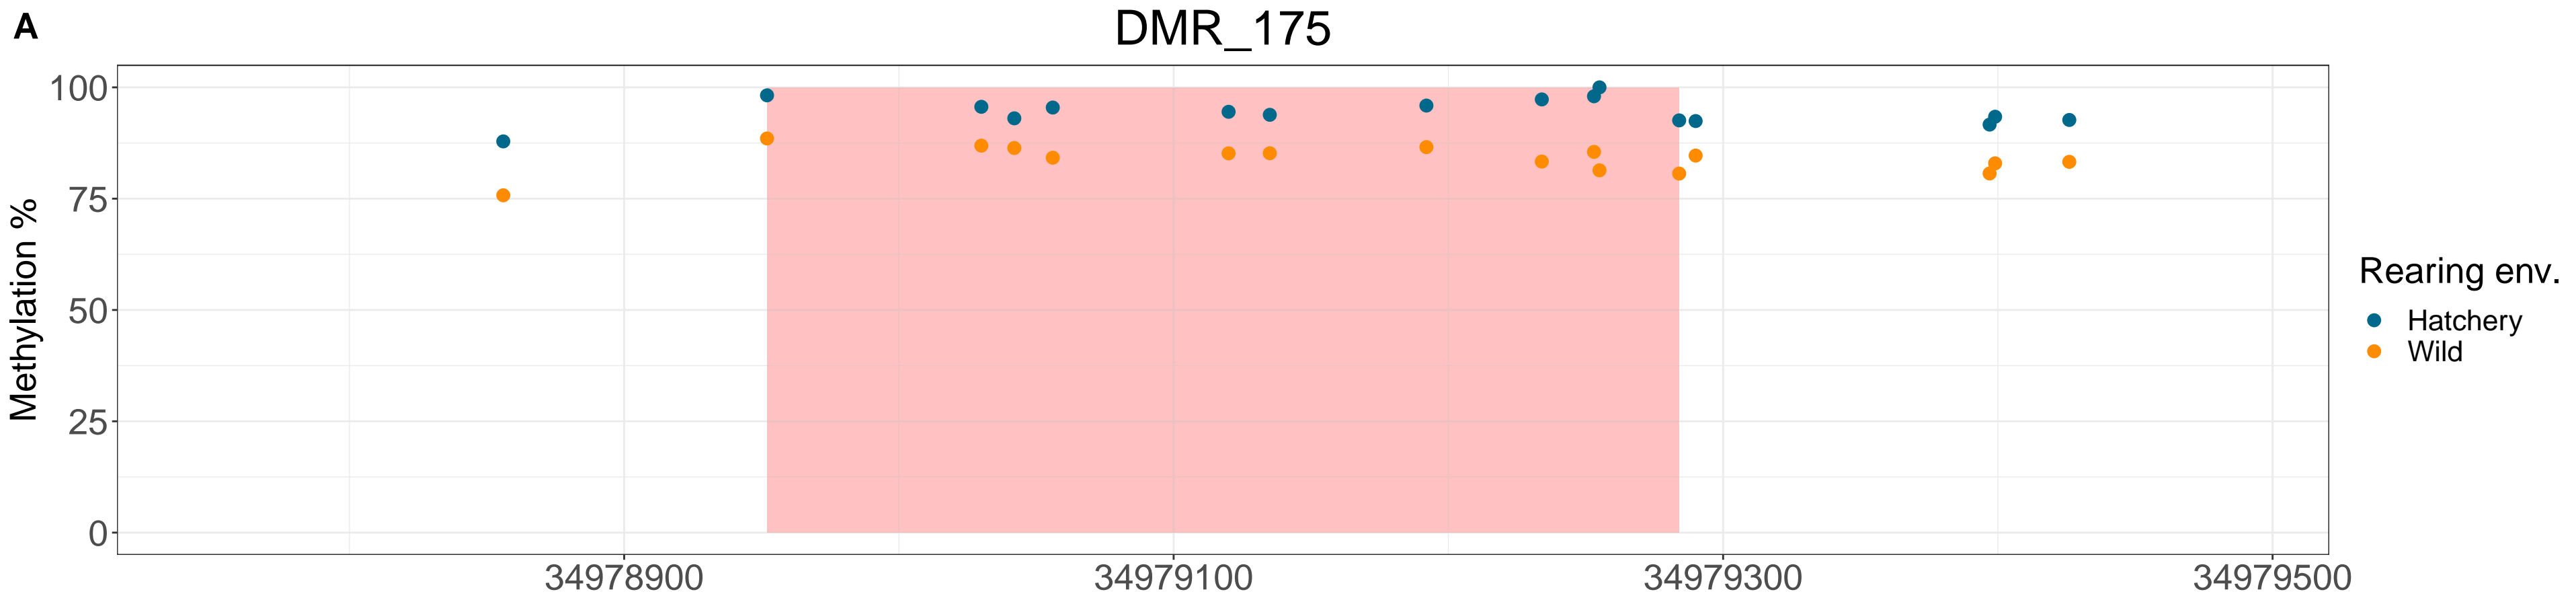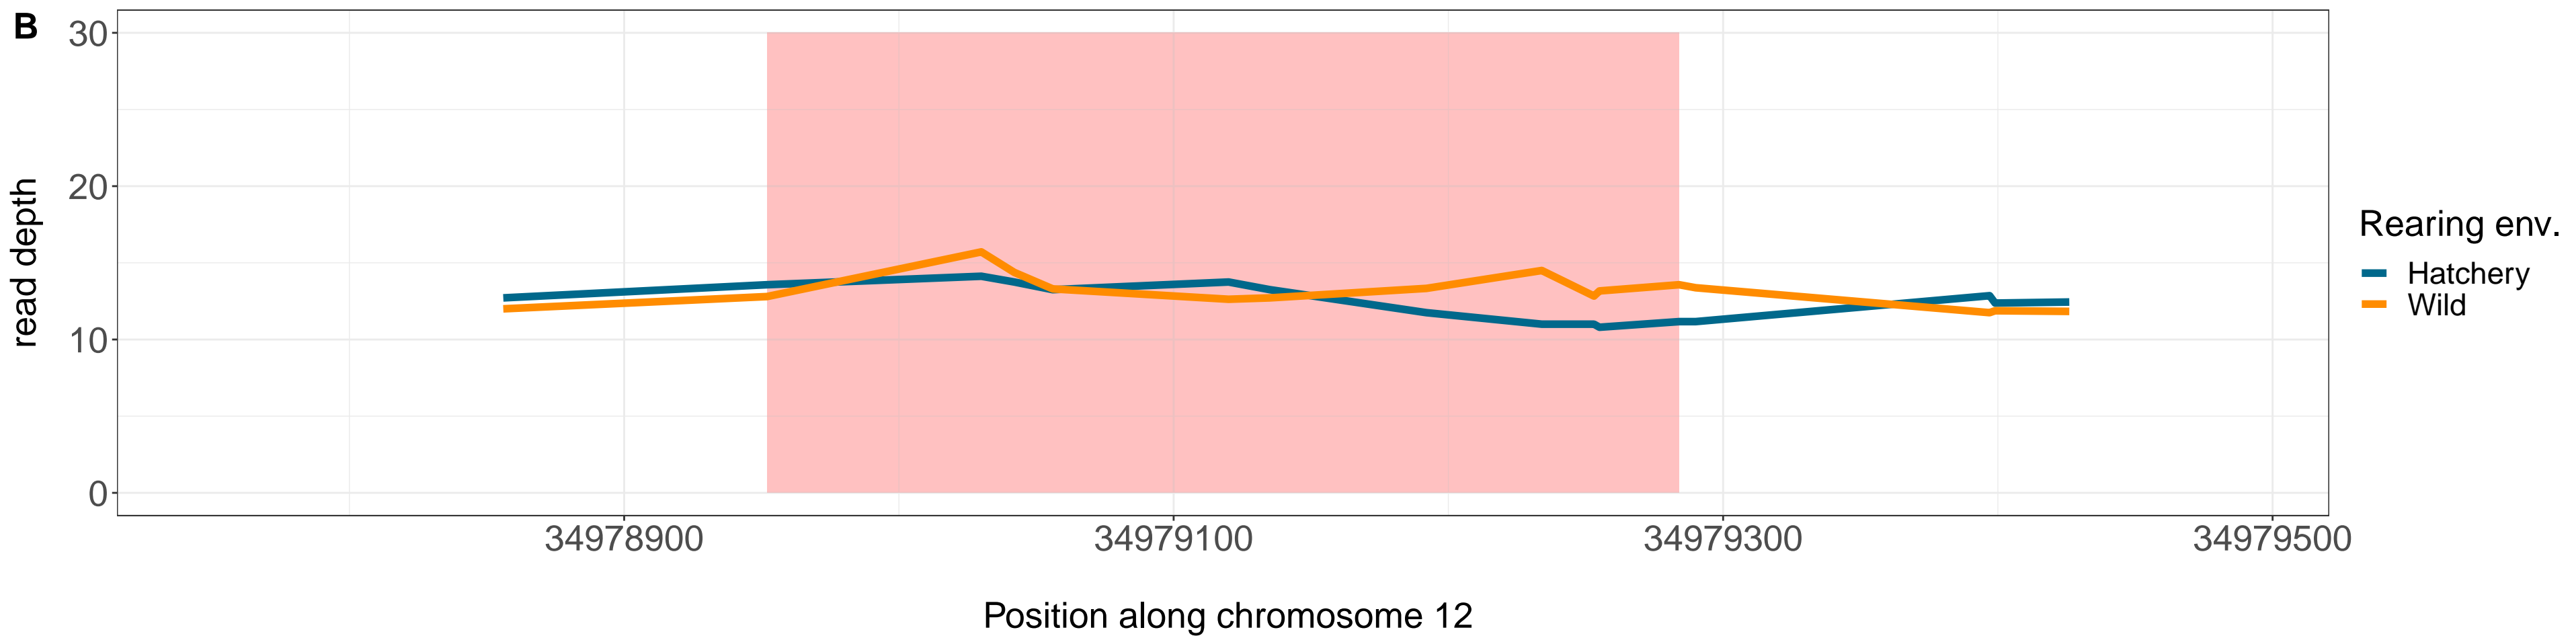

# DMR\_176

XM\_020492041.1

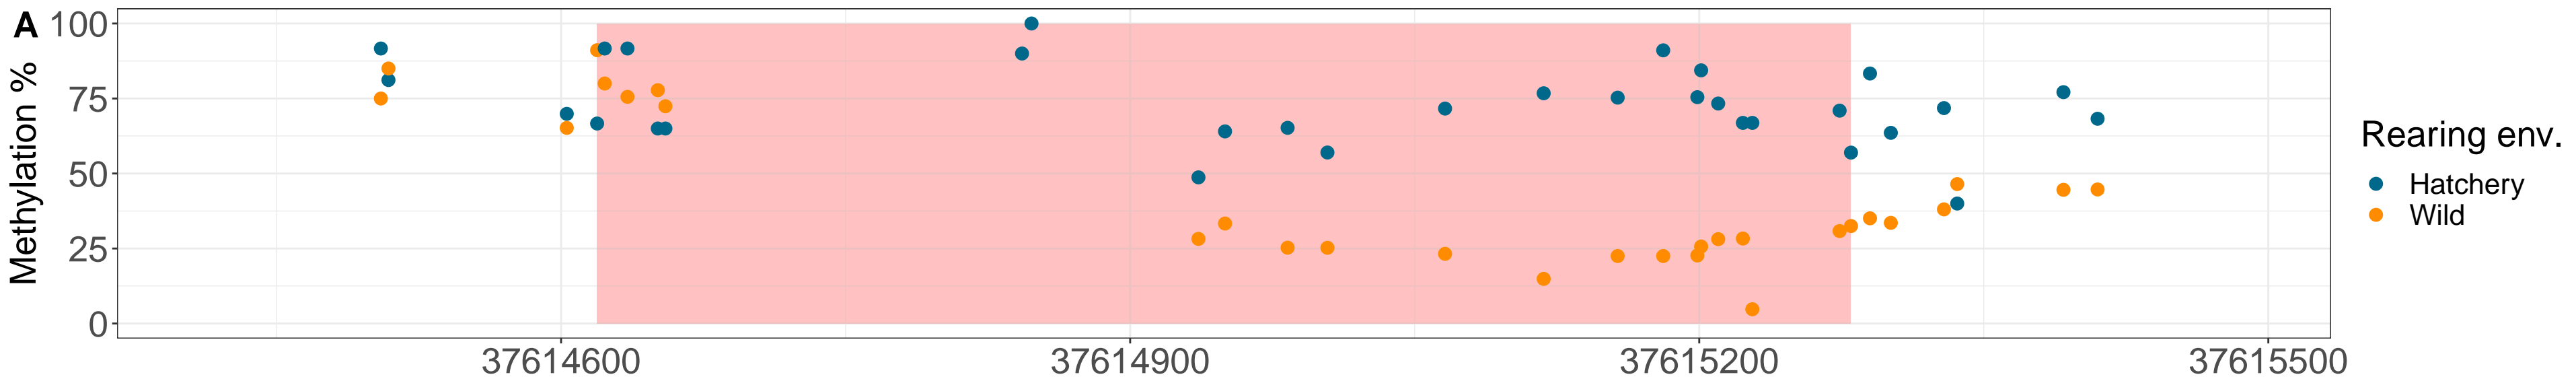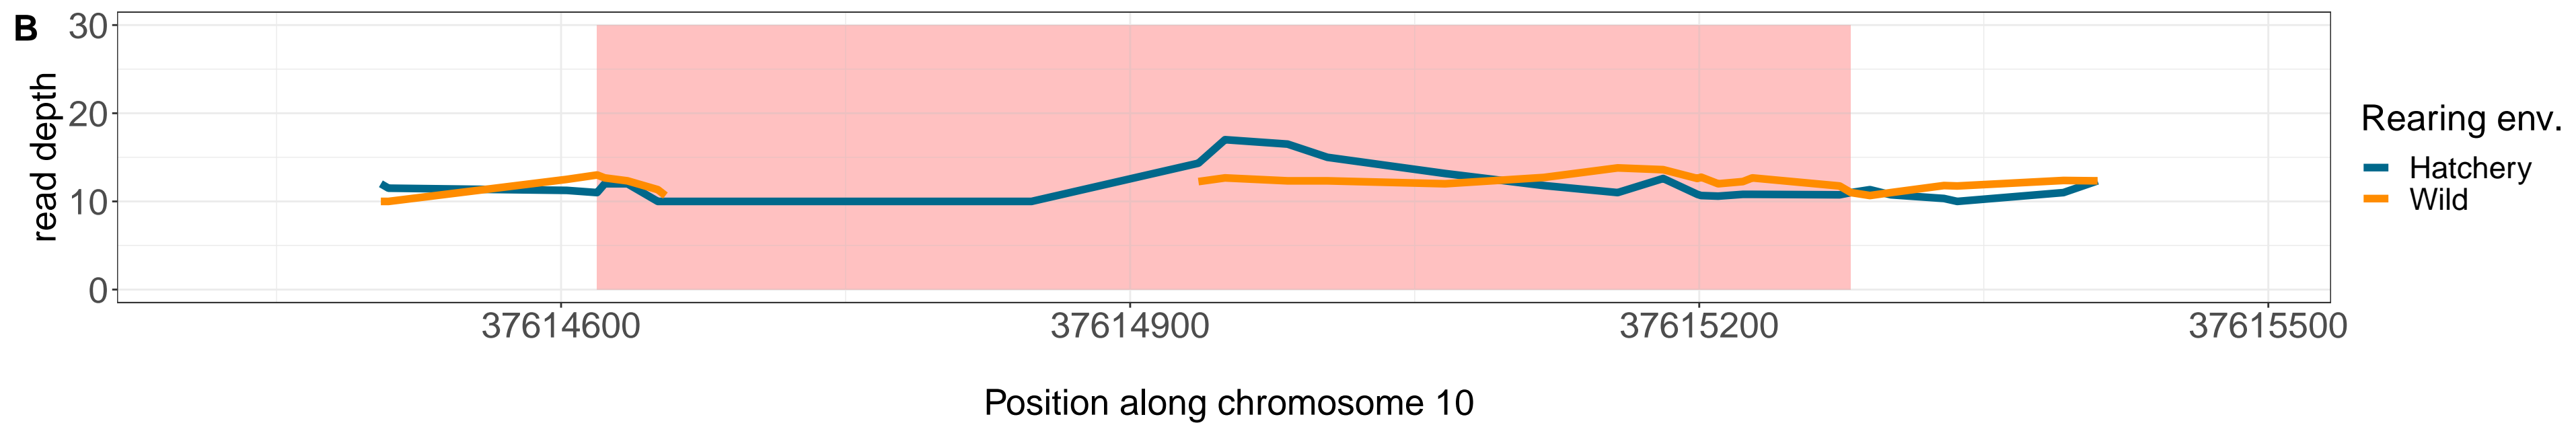

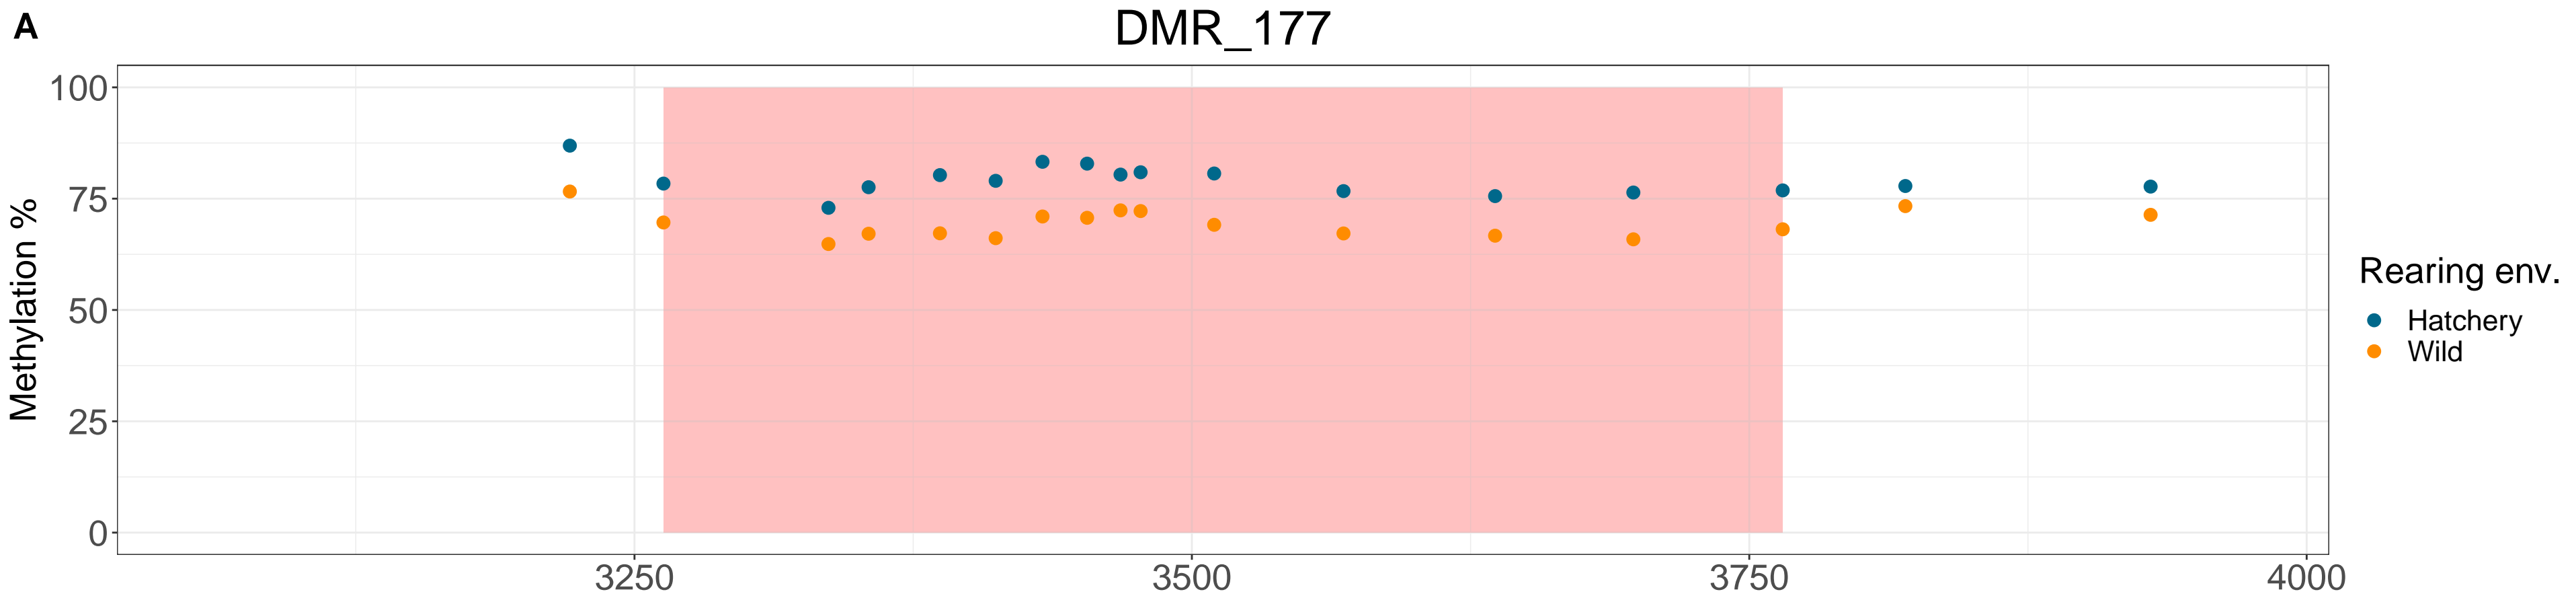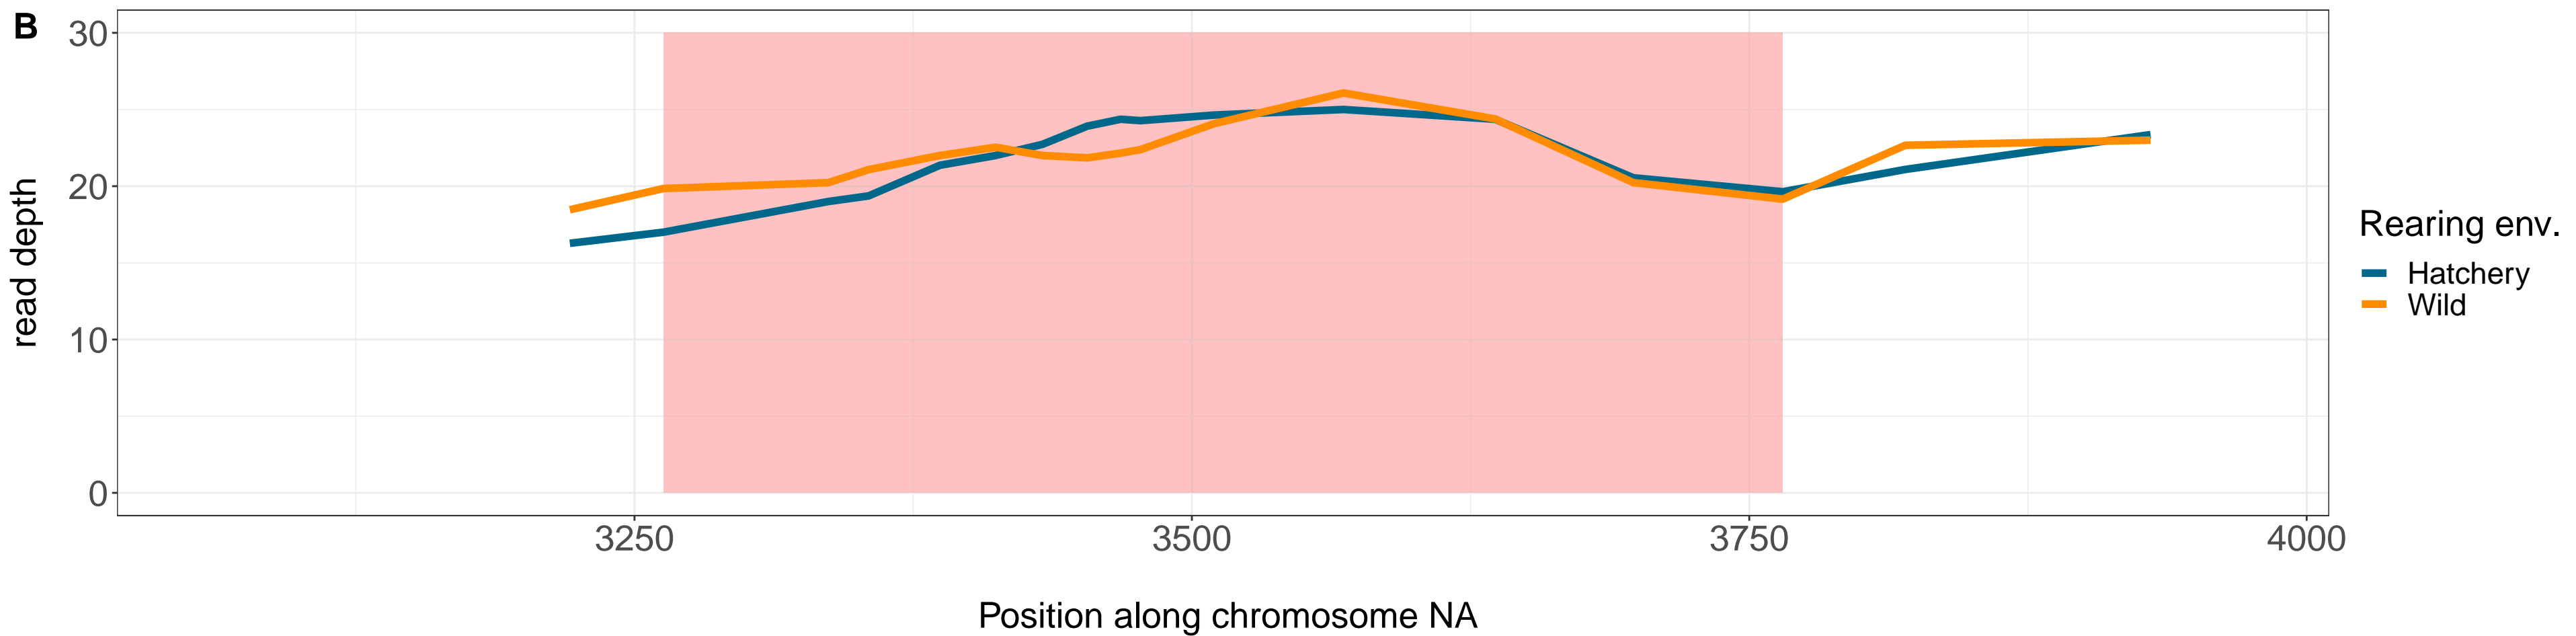

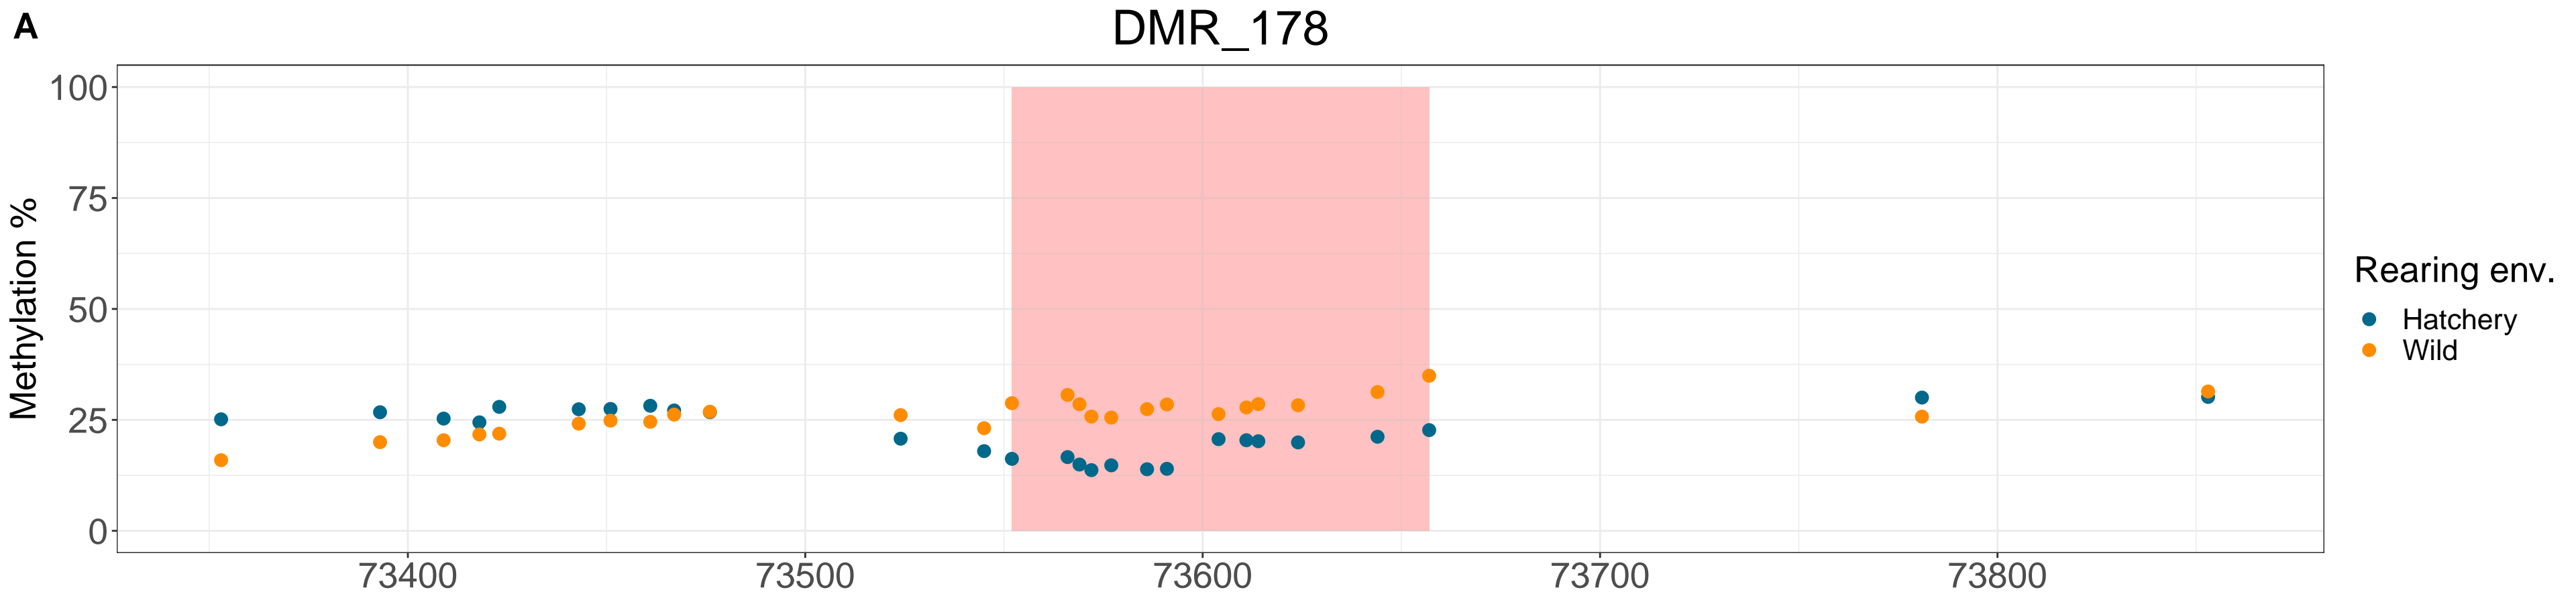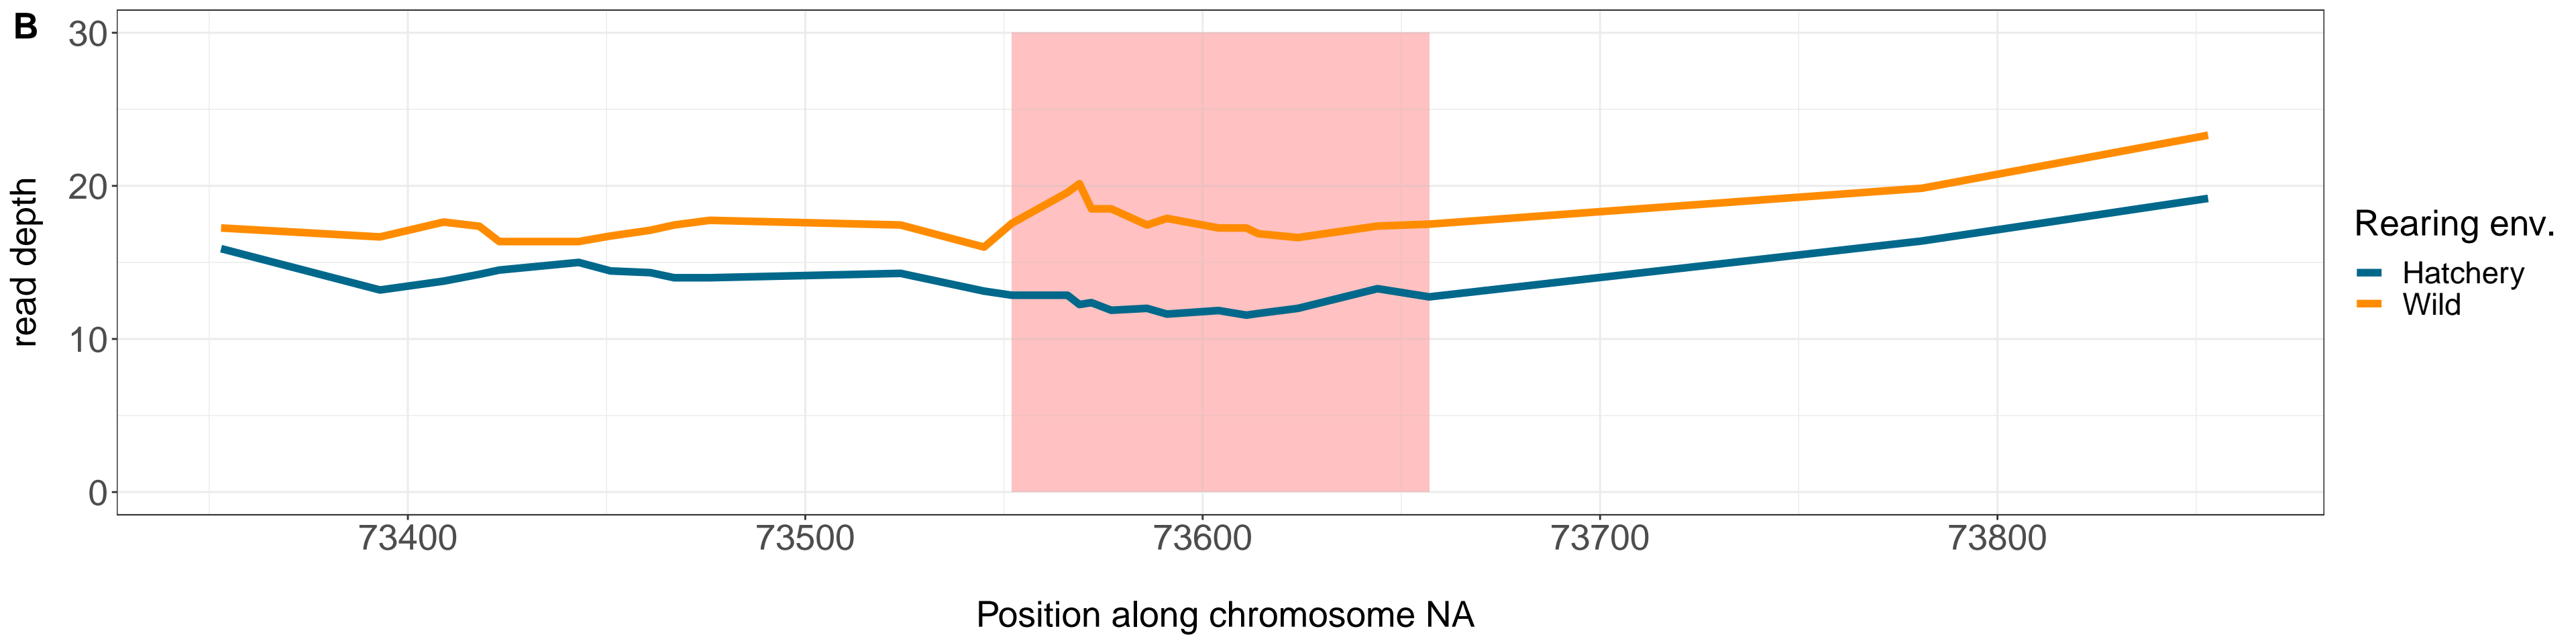

# DMR\_179

XM\_020464133.1

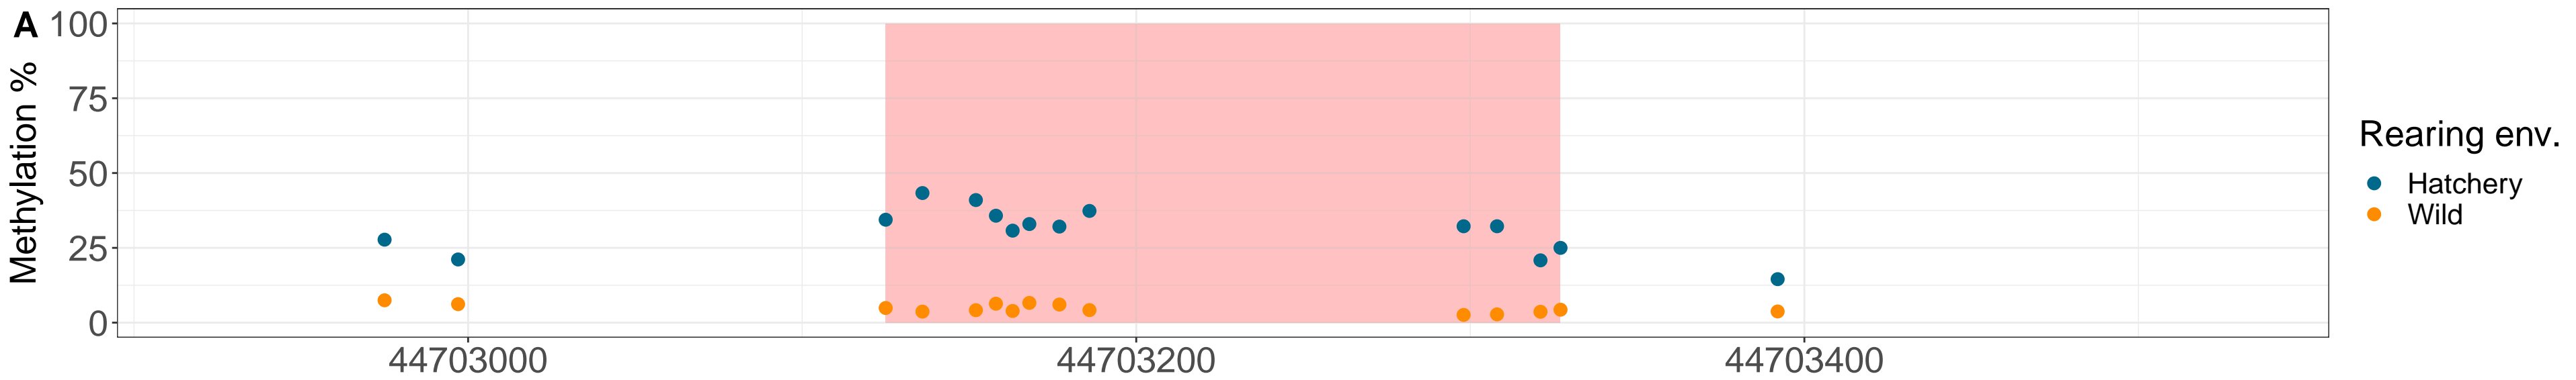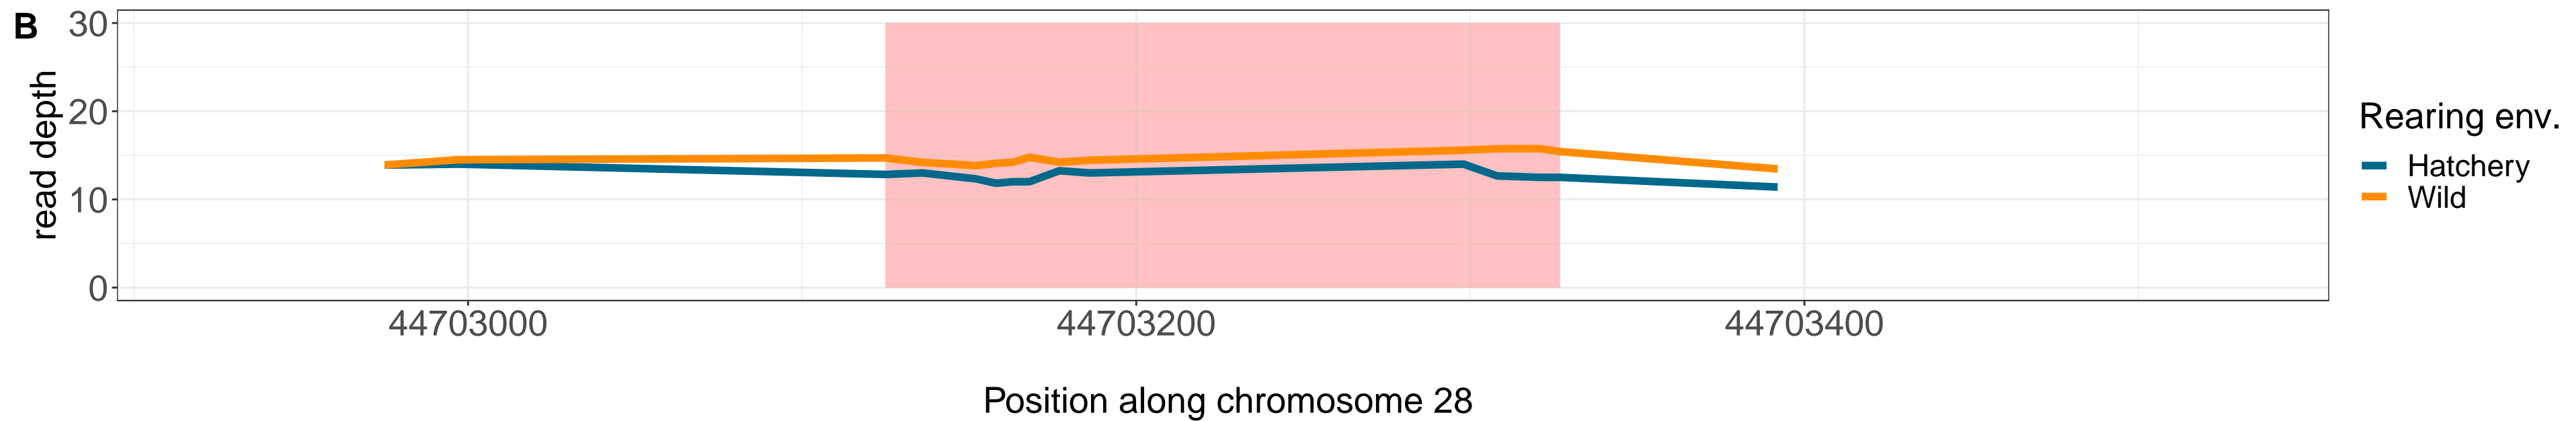



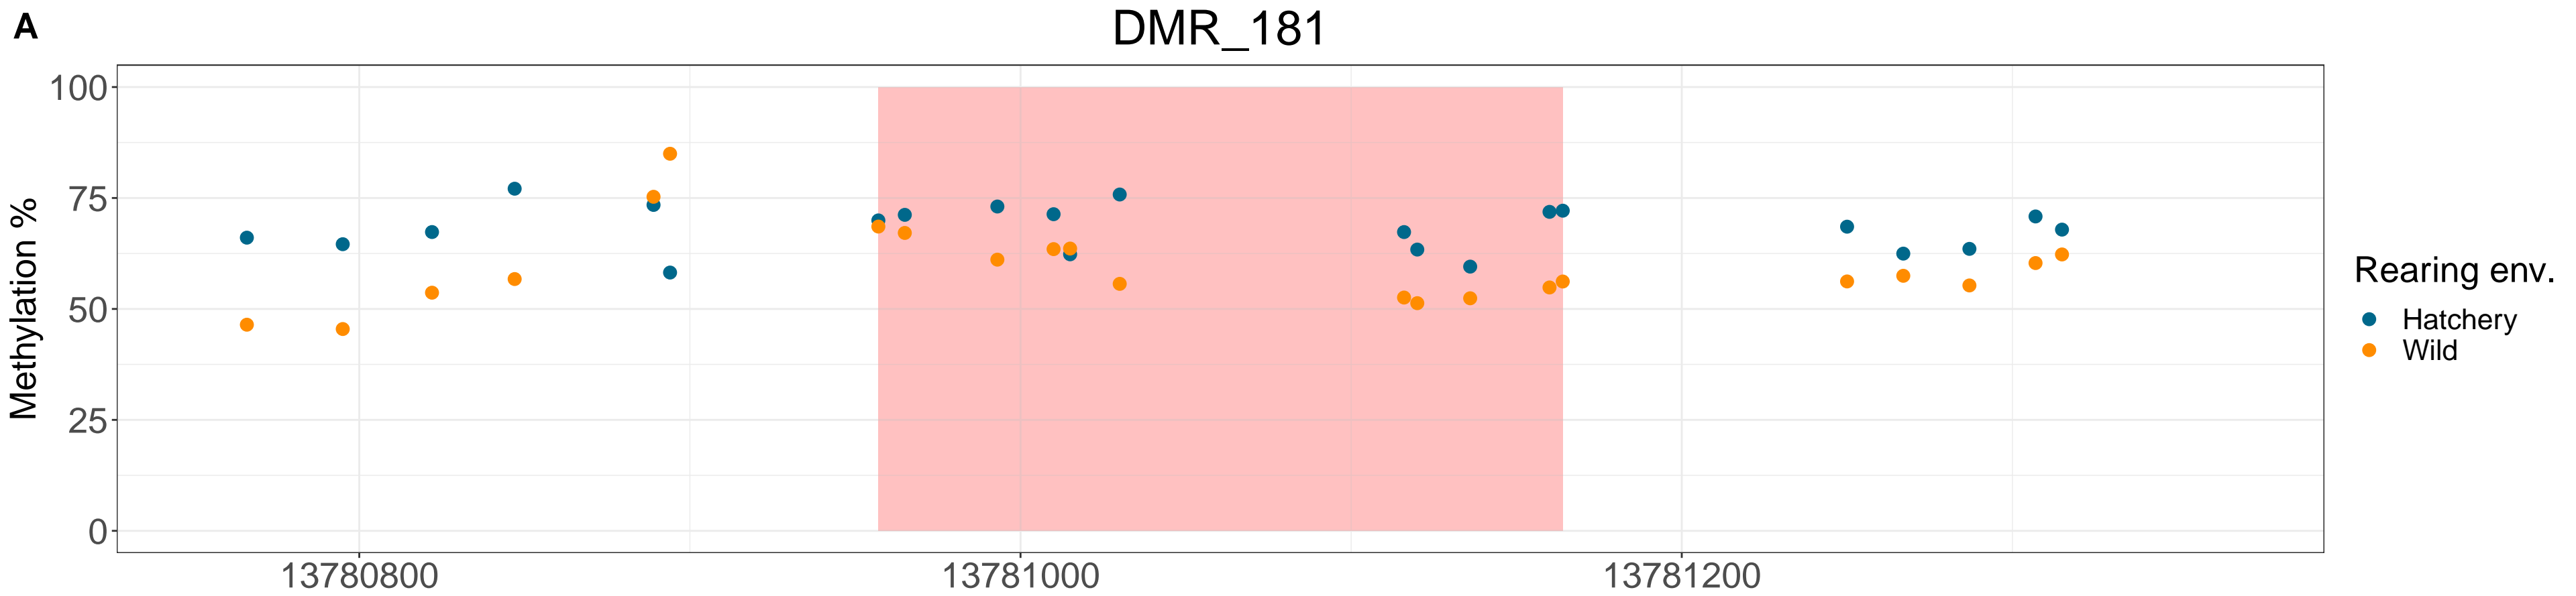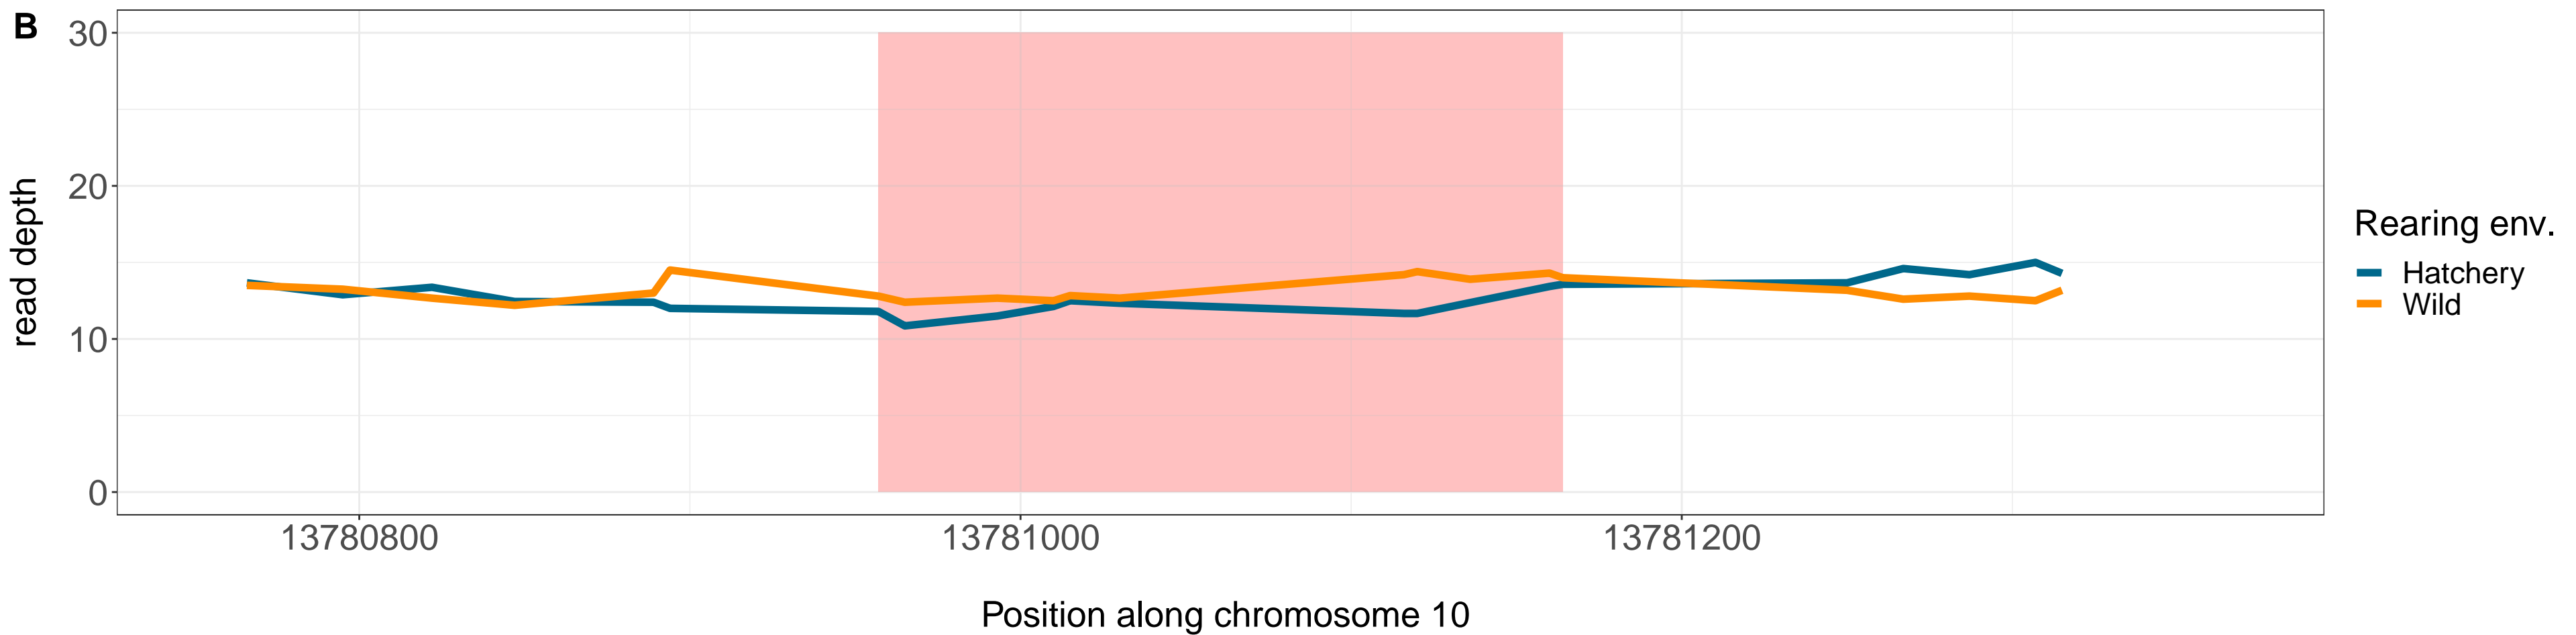

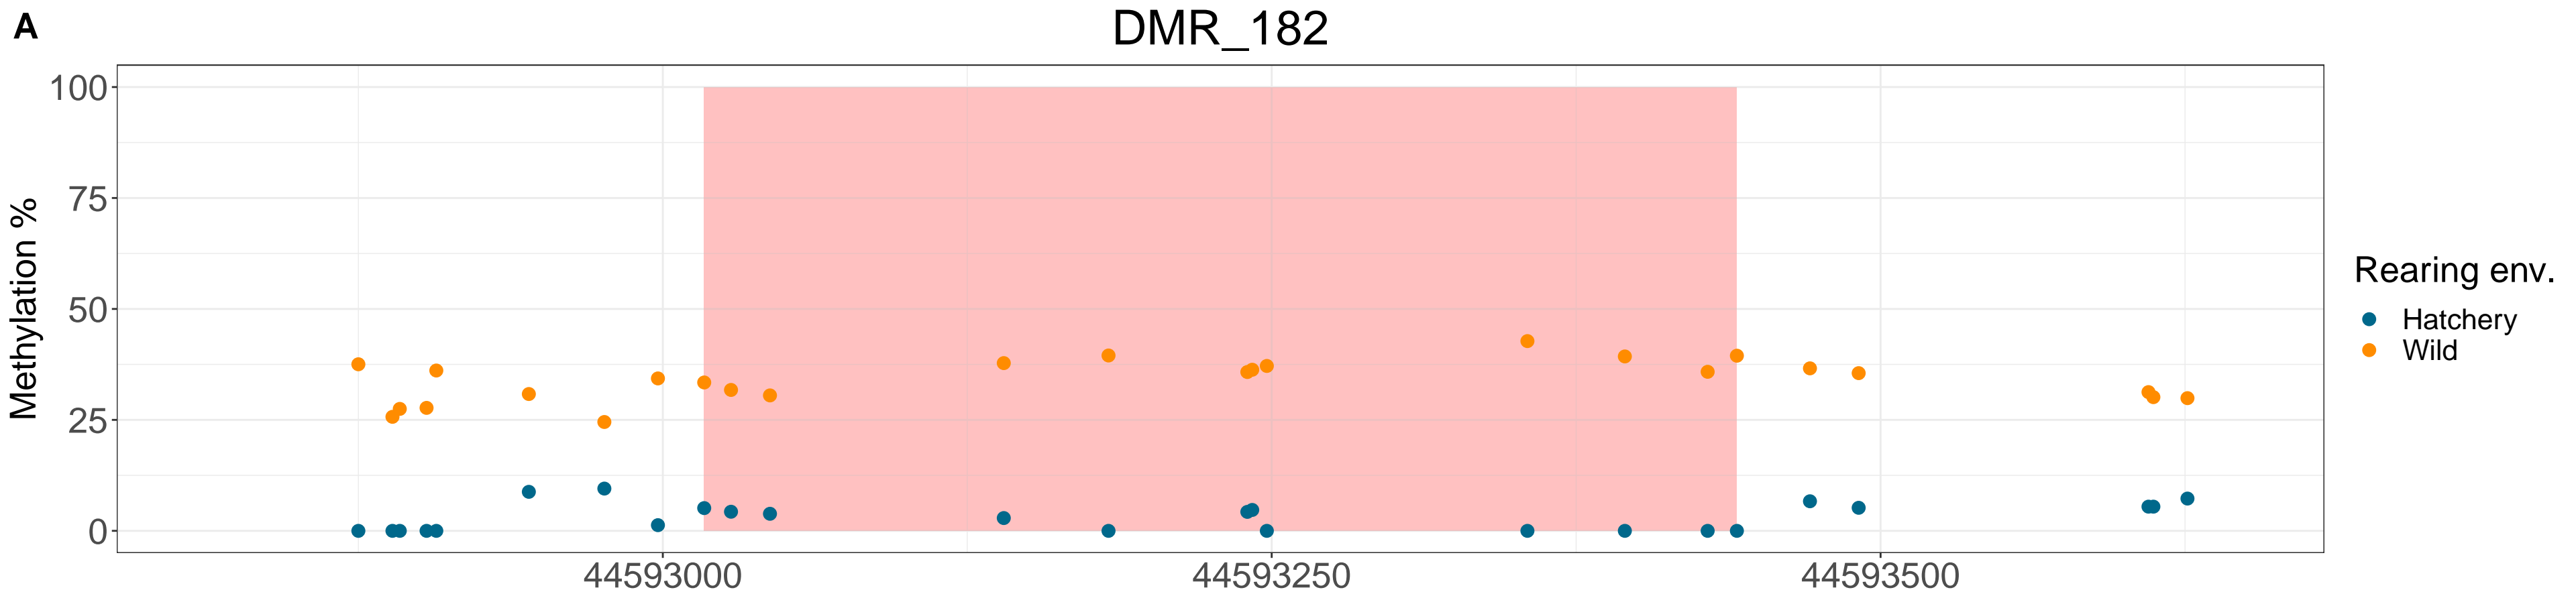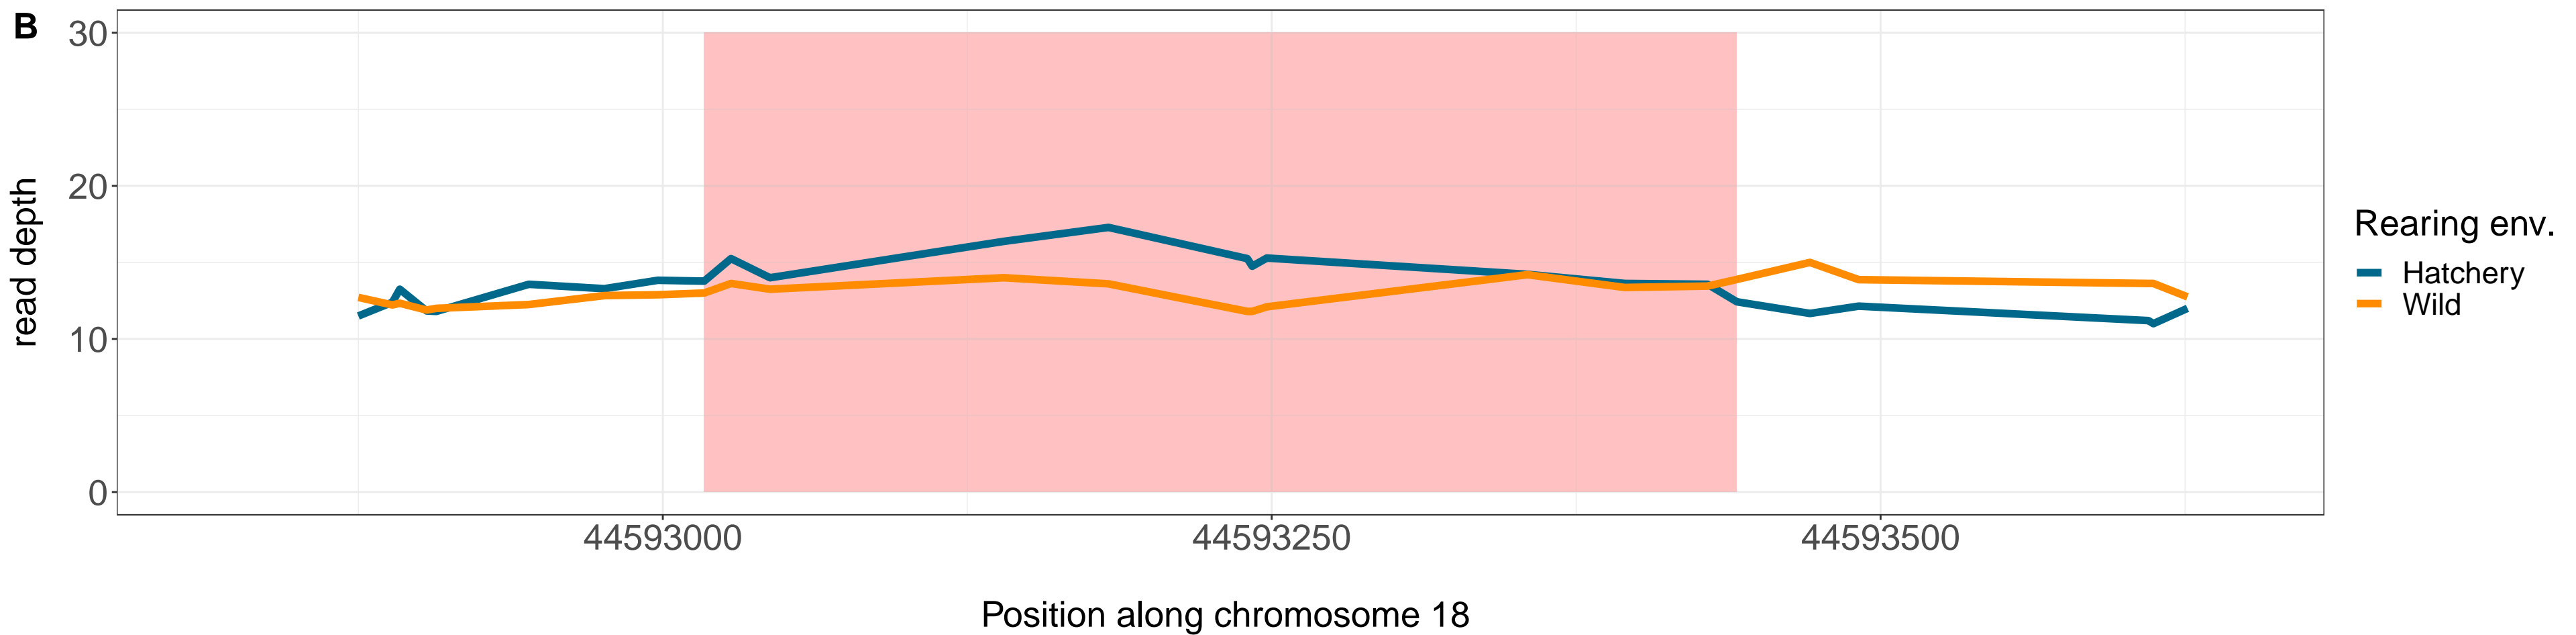

# DMR\_183

XM\_020501880.1

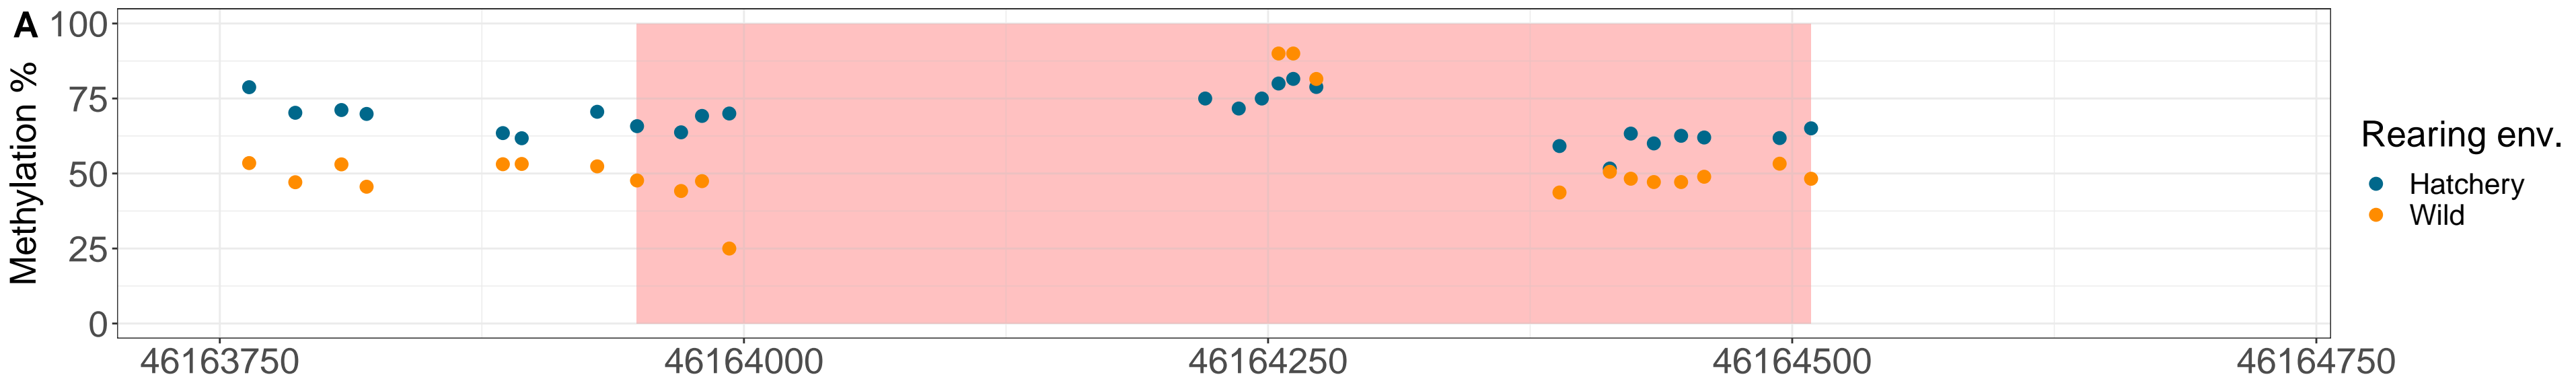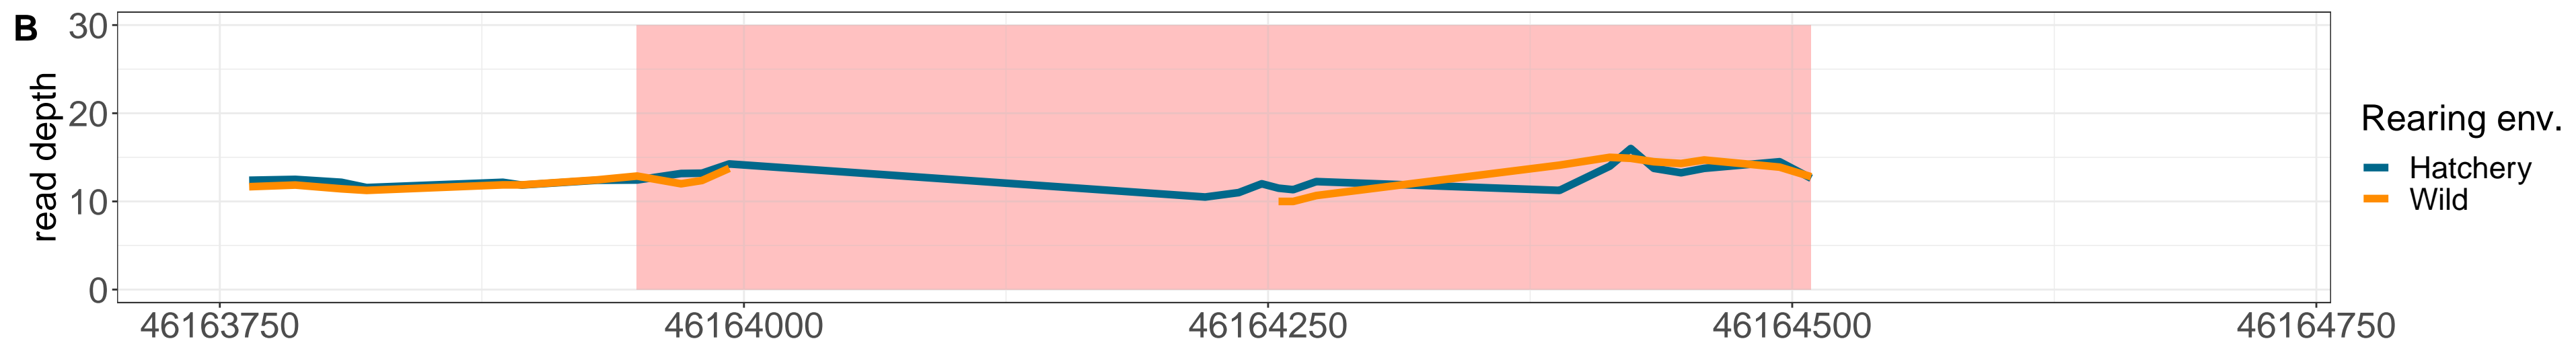

Position along chromosome 15

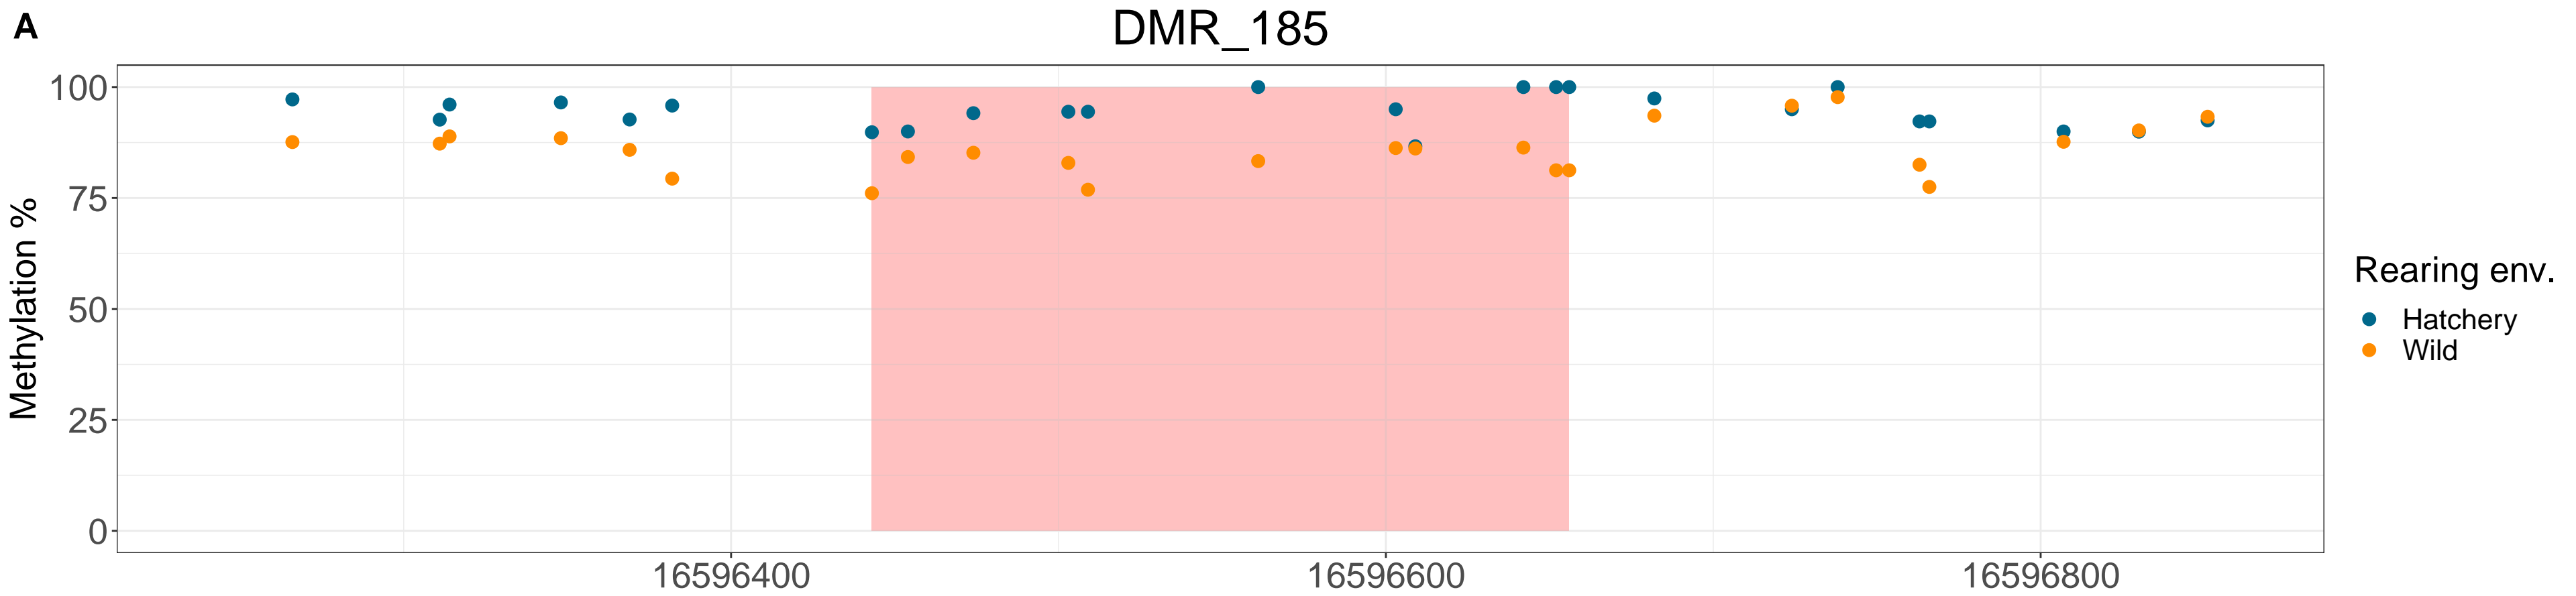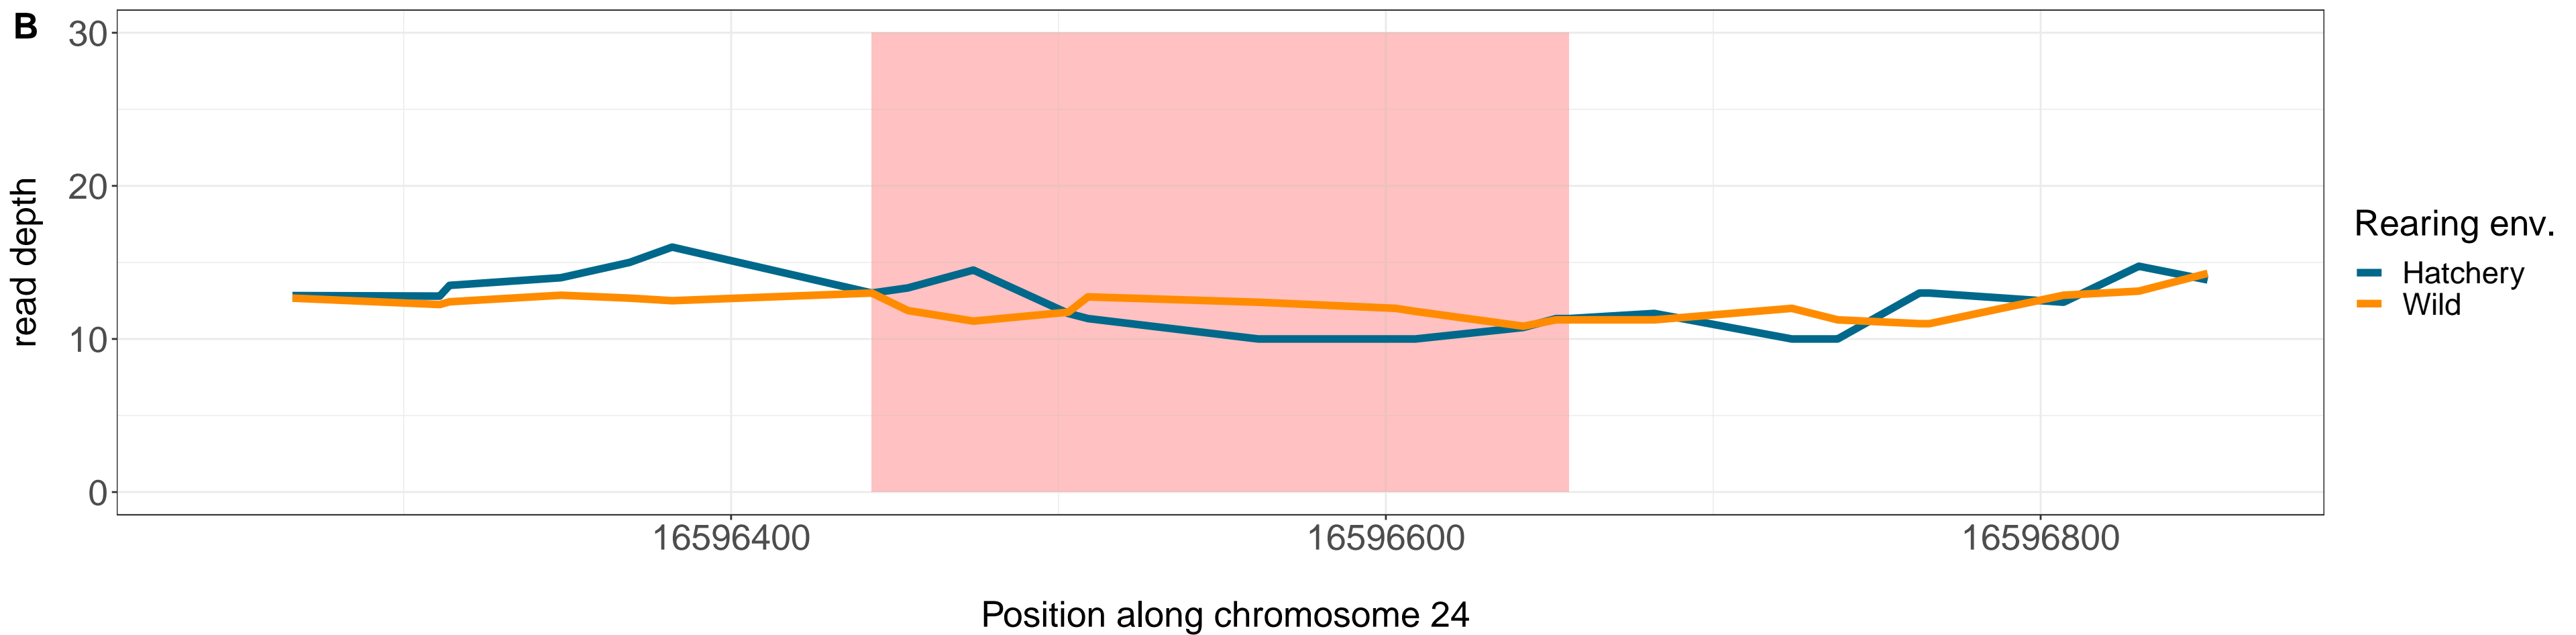

**A**

DMR\_186

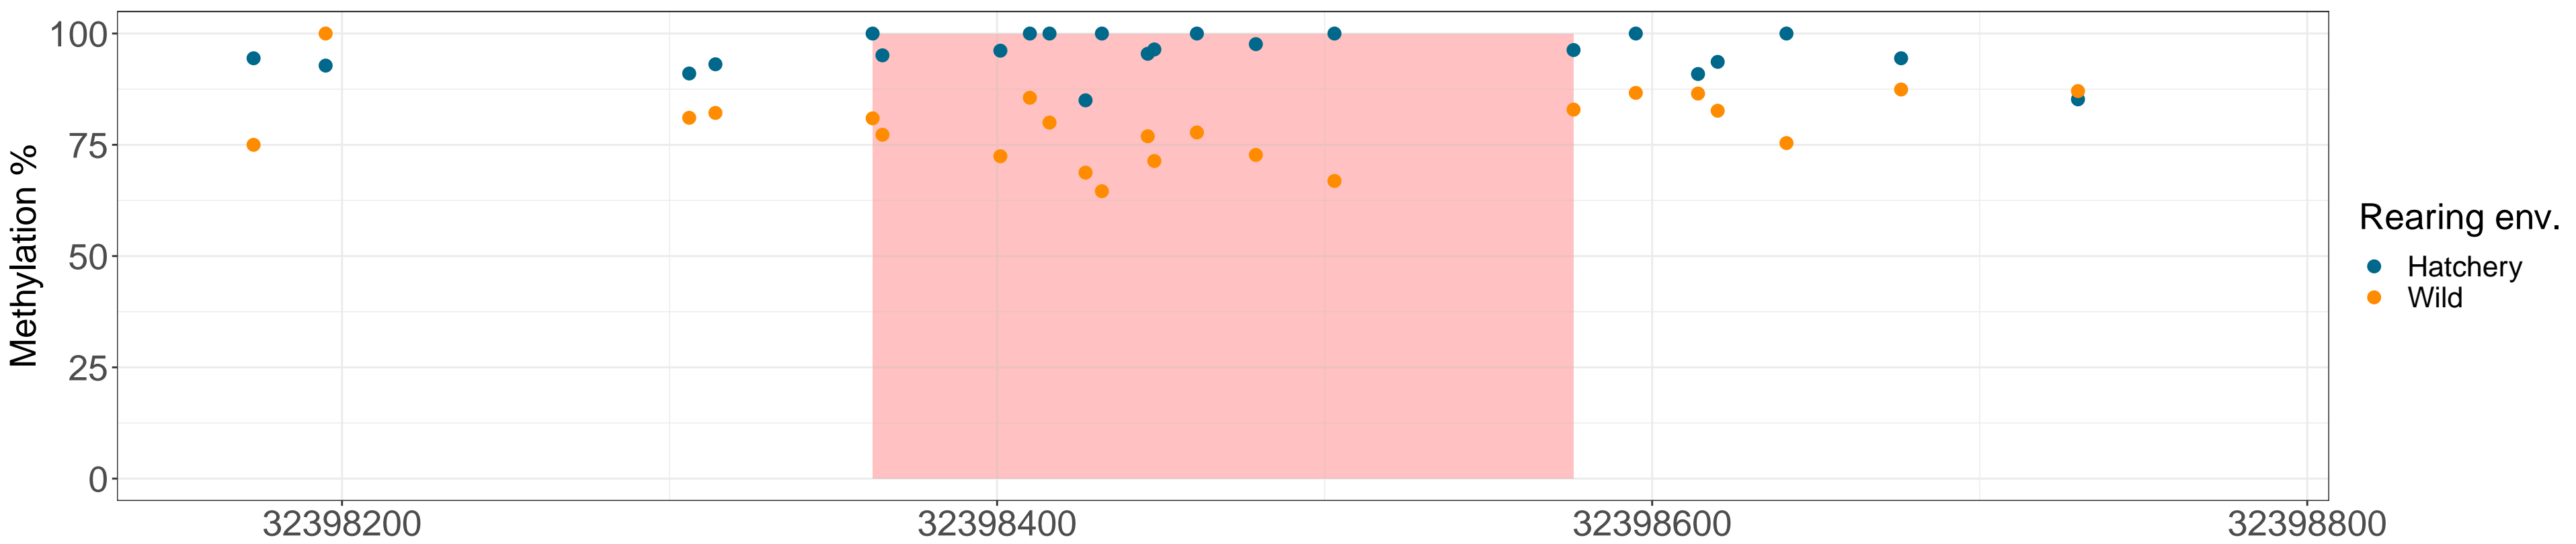**B**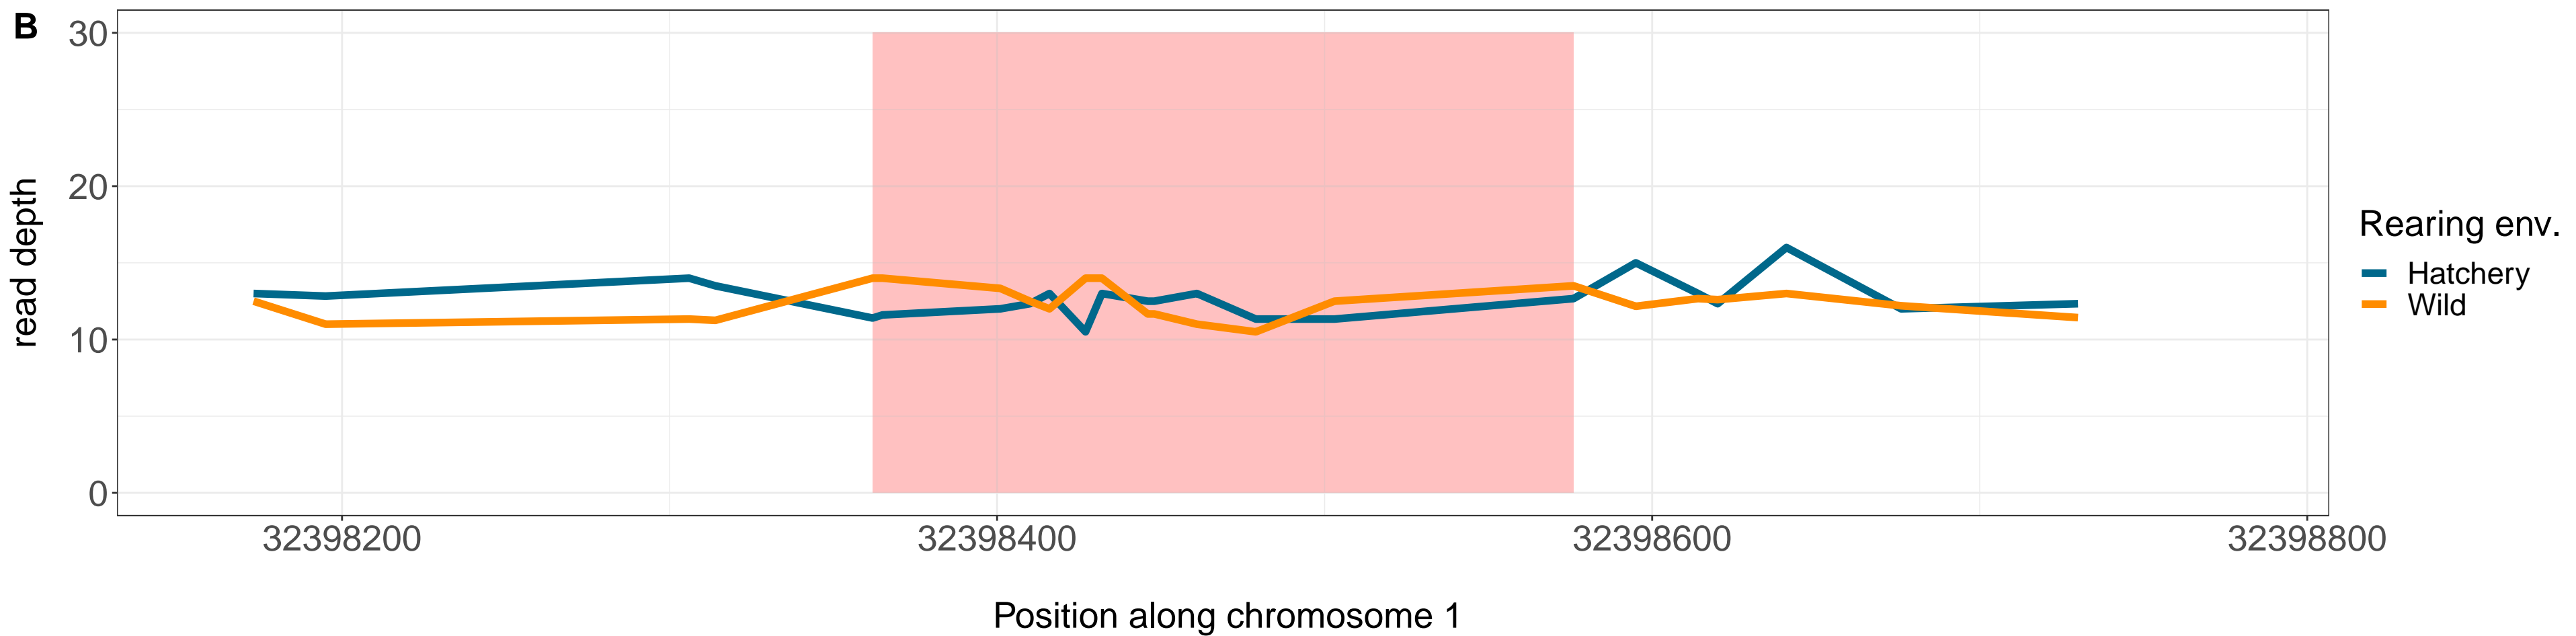

# DMR\_187

XM\_020476394.1

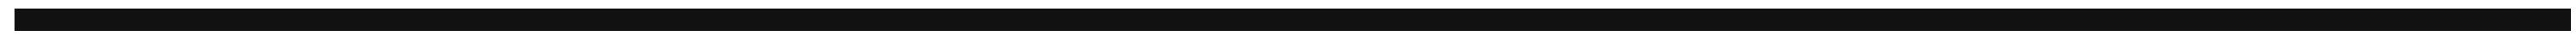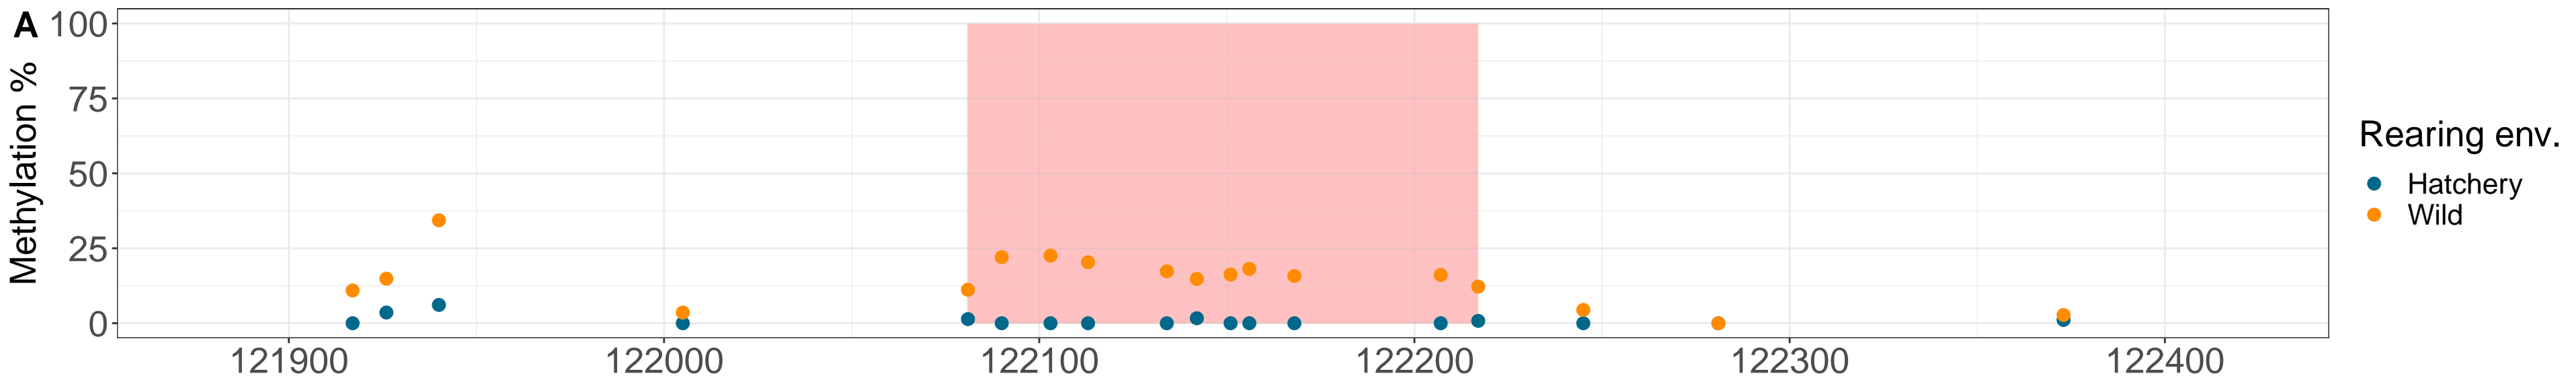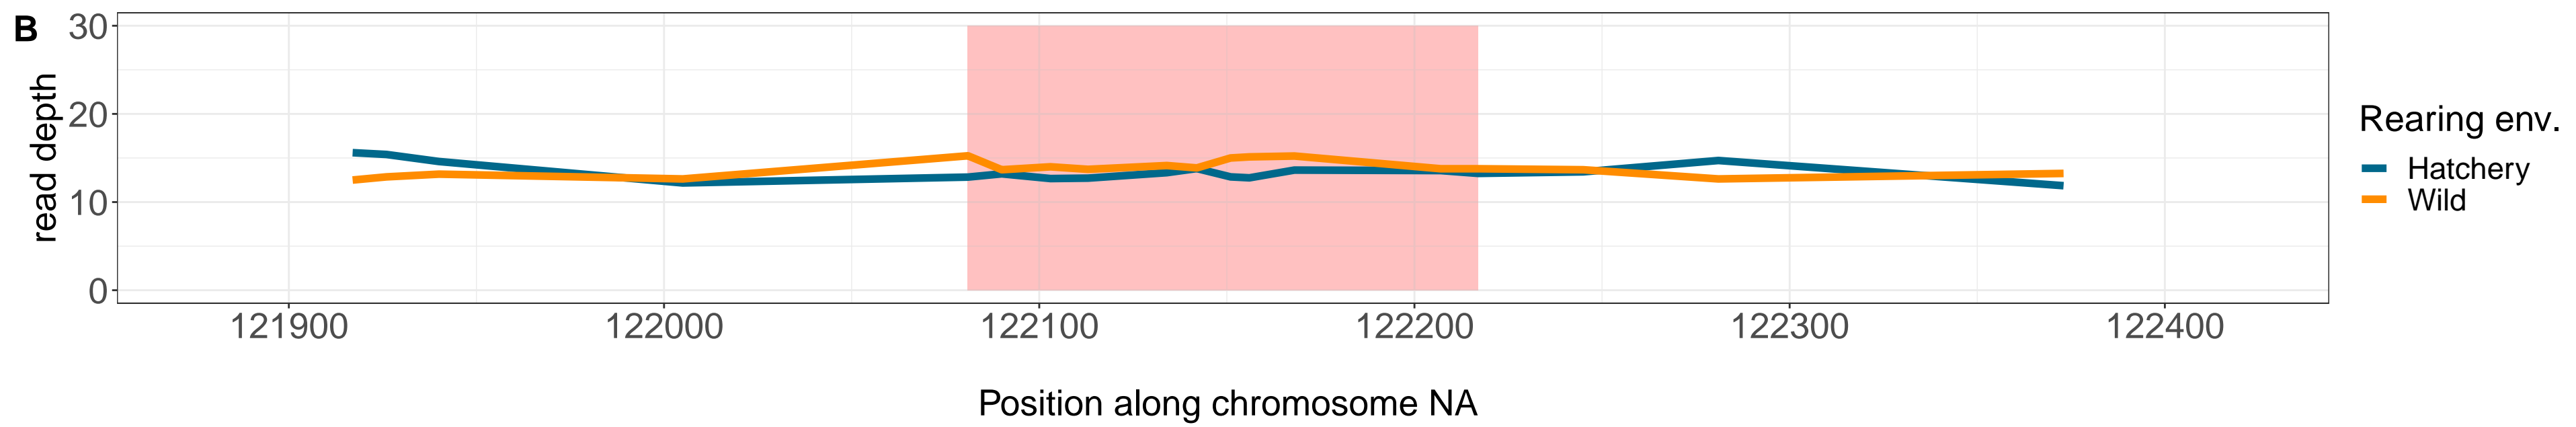

**A**

## DMR\_188

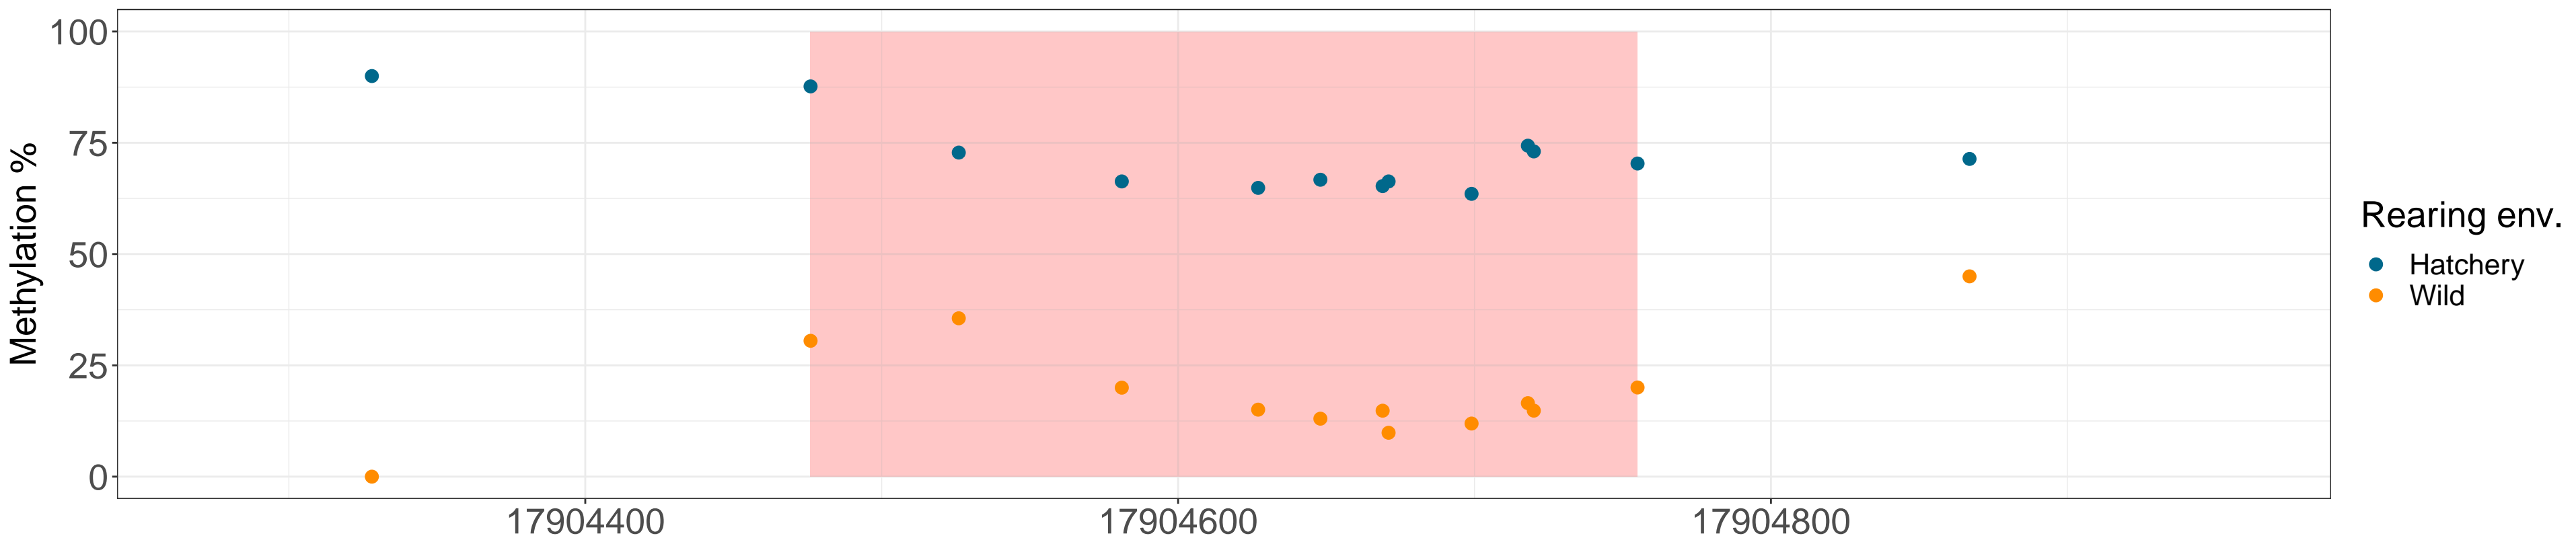**B**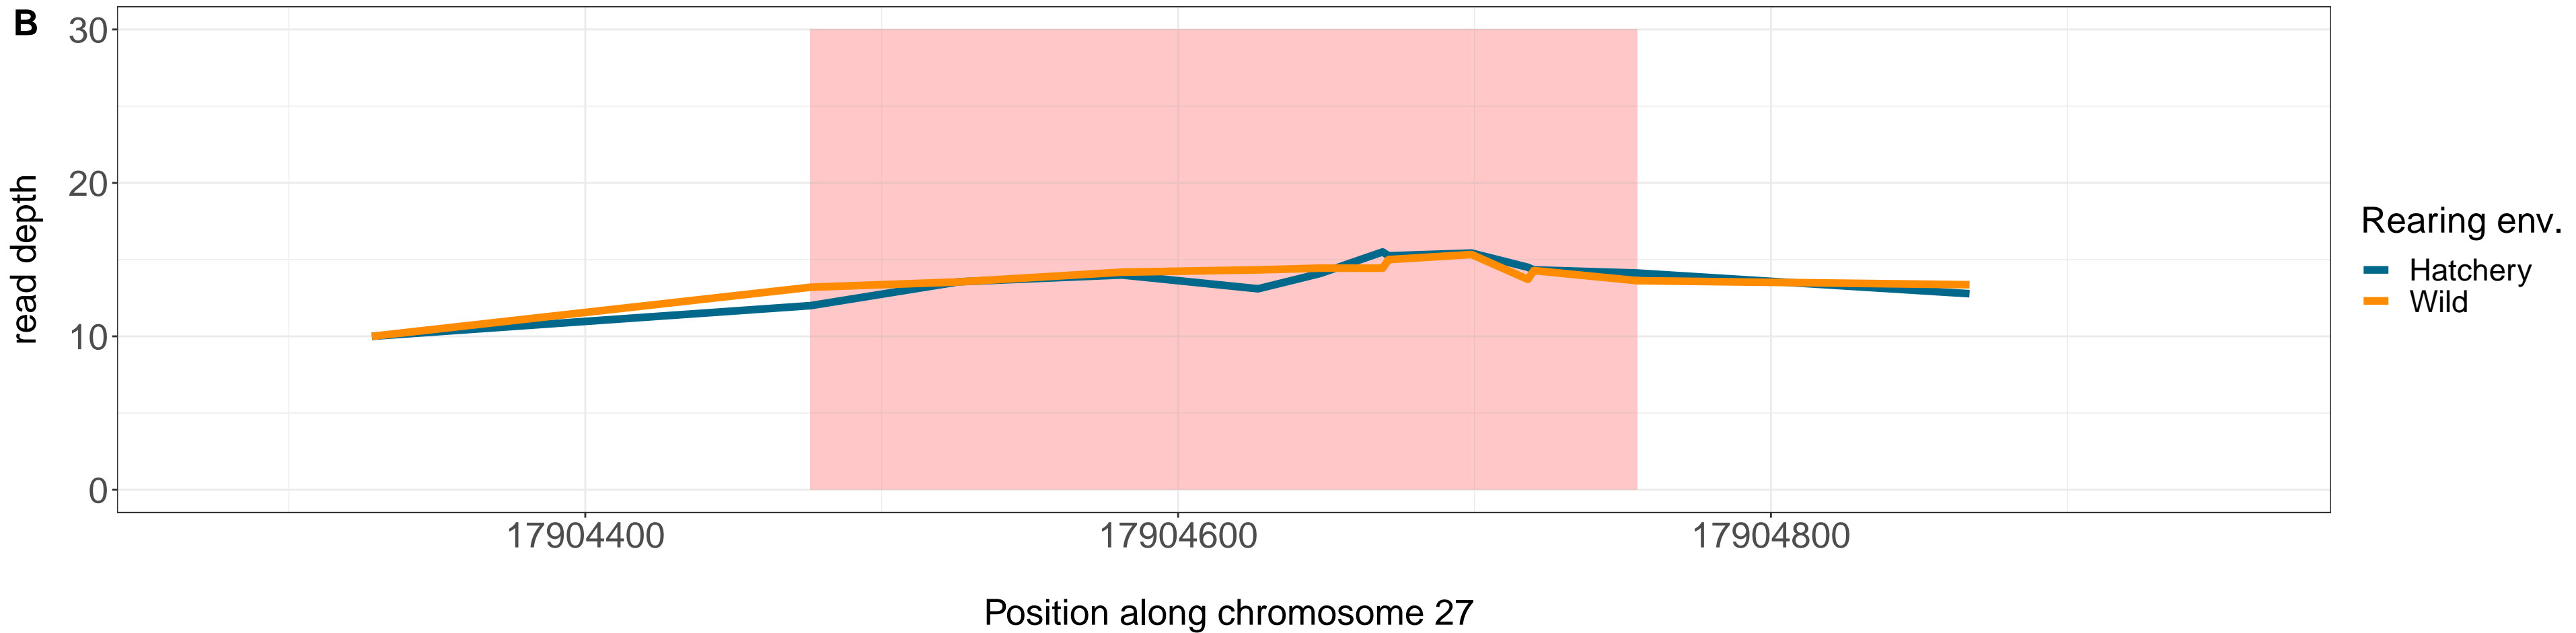

**A**

## DMR\_189

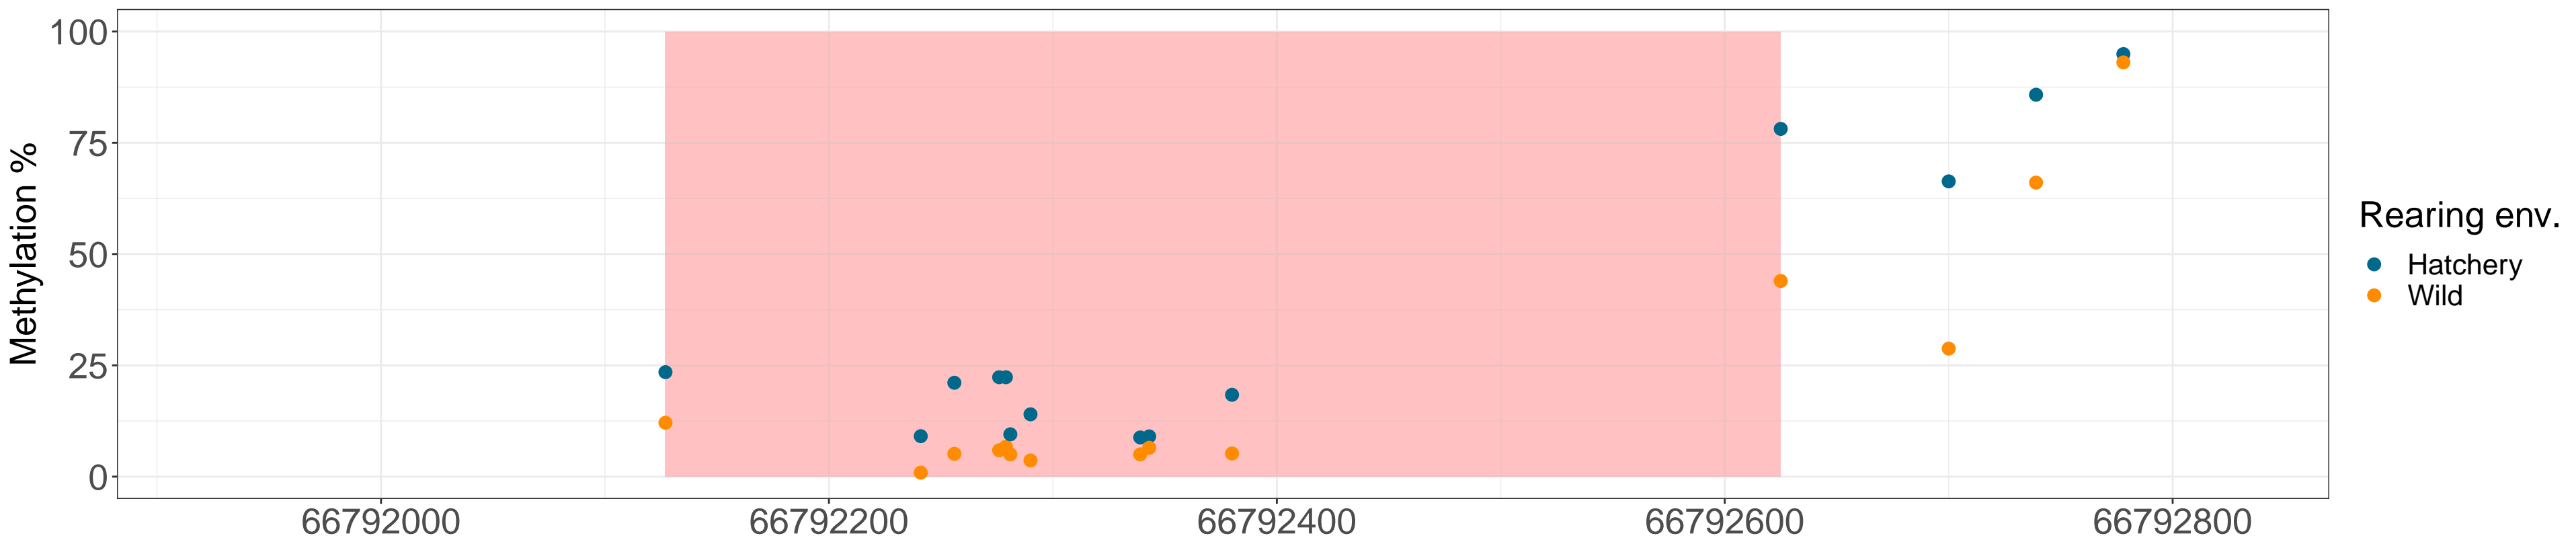**B**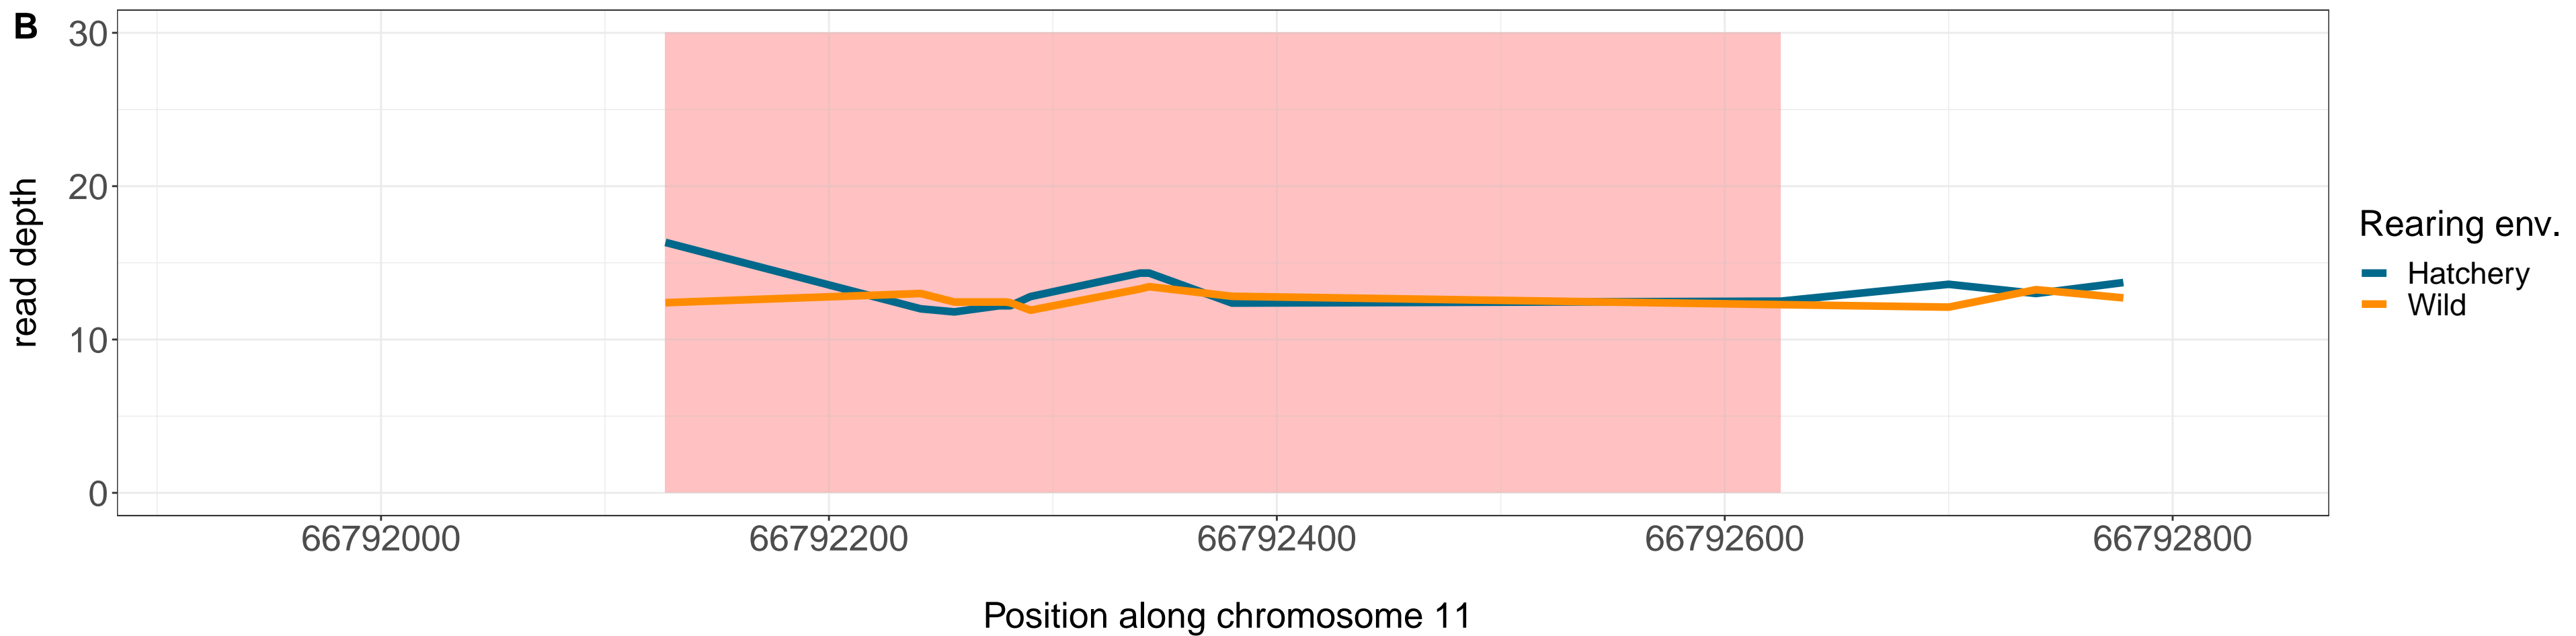



**A**

## DMR\_190

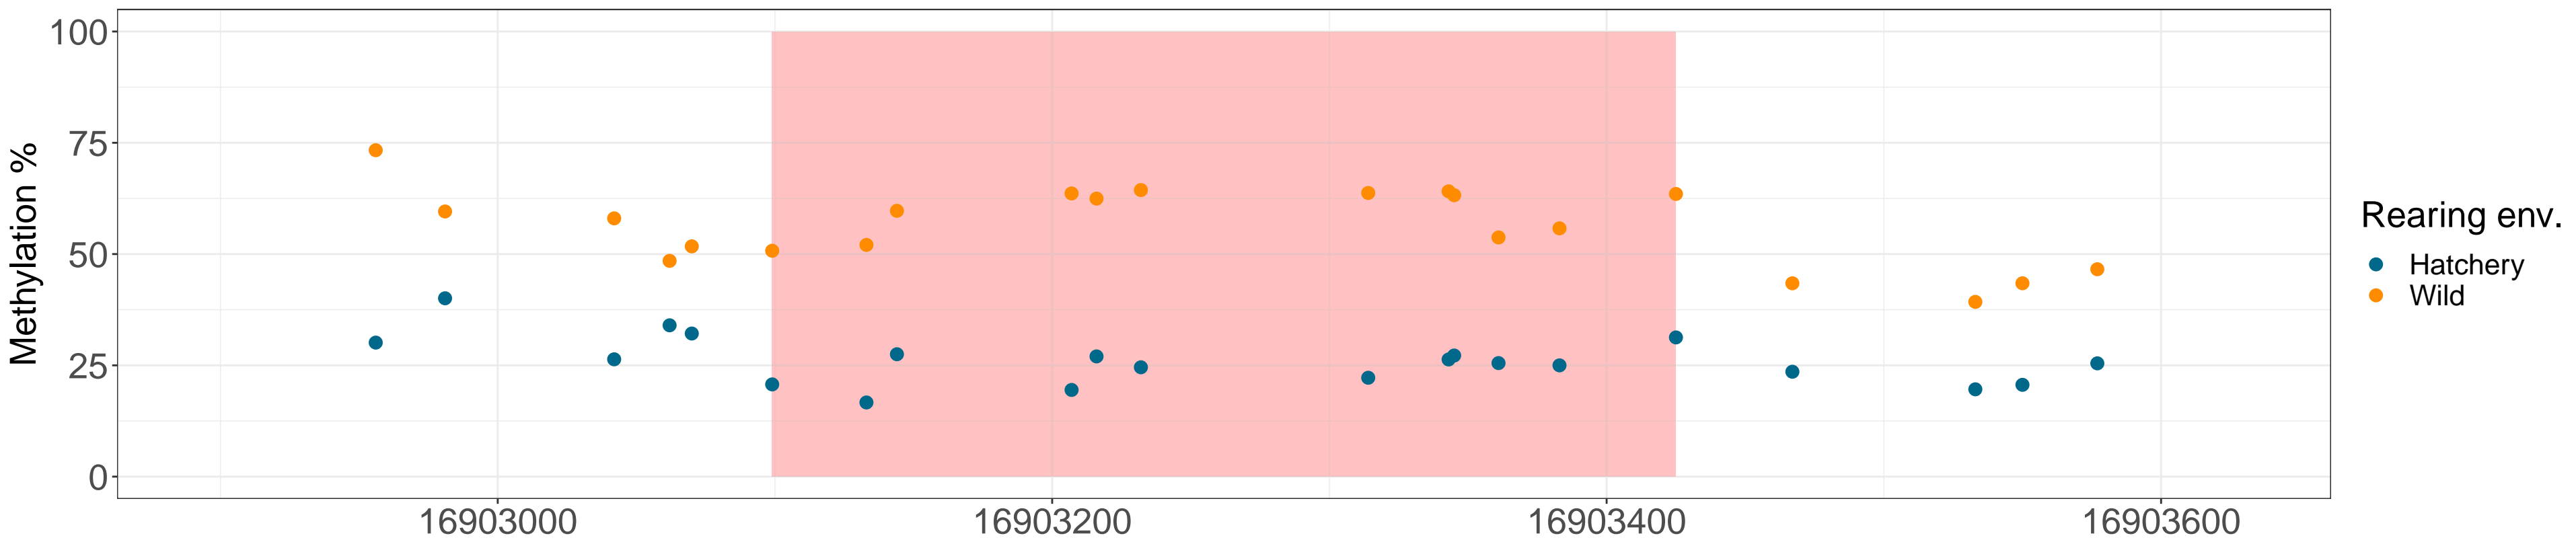**B**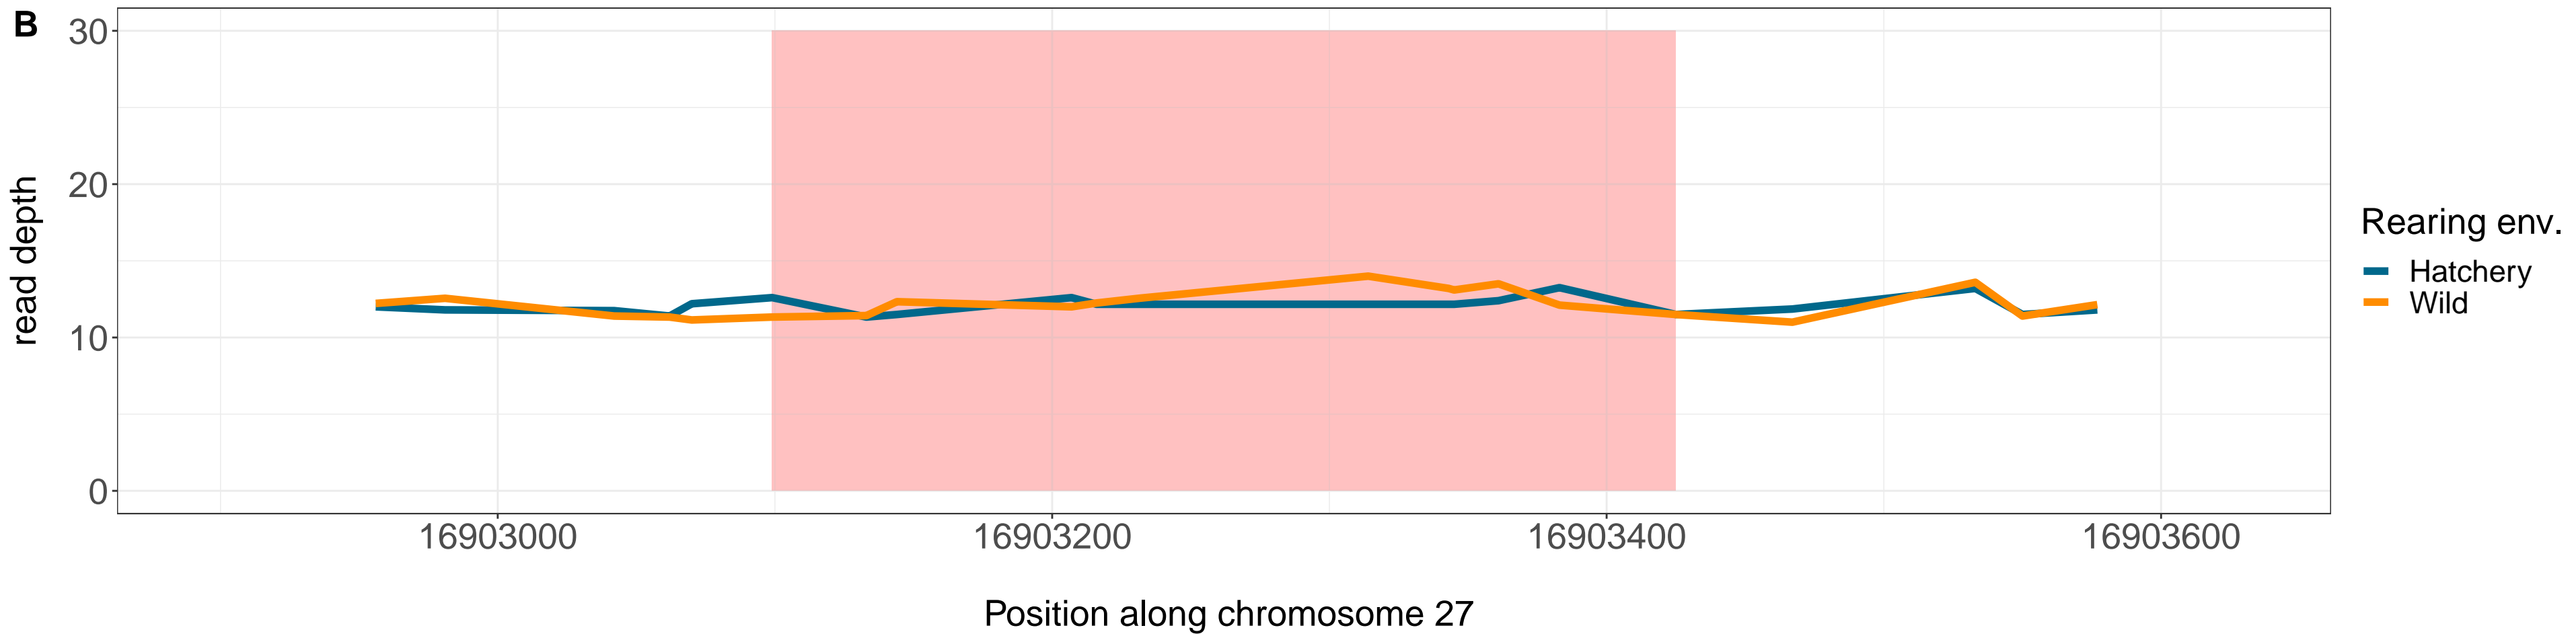

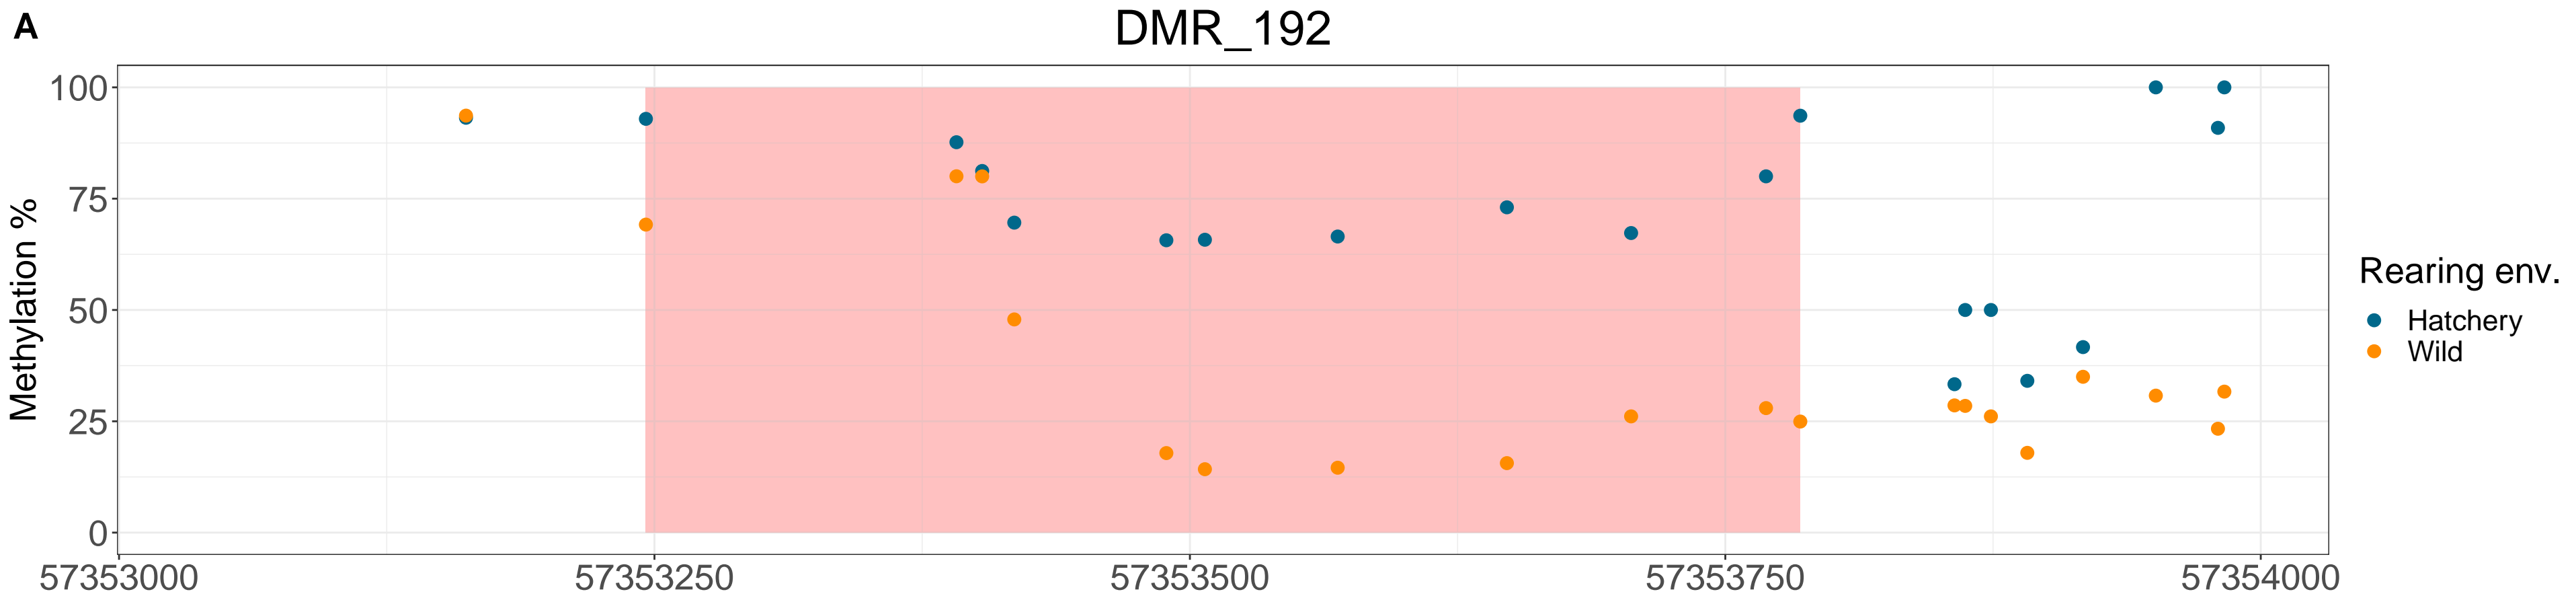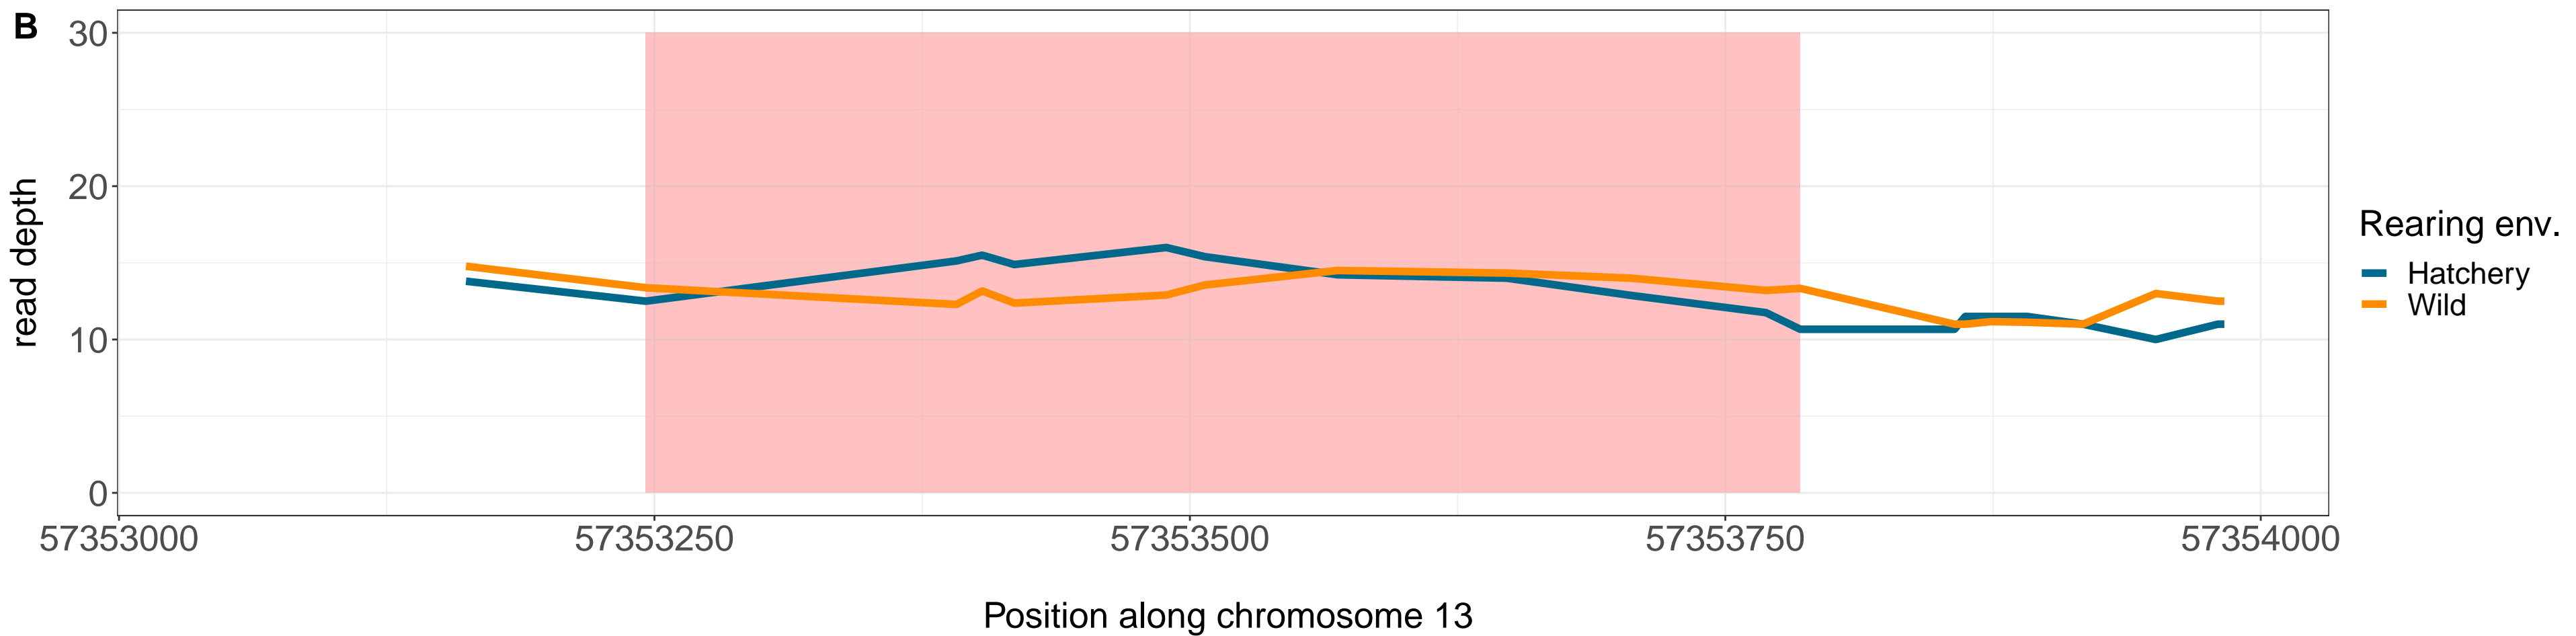

**A**

## DMR\_193

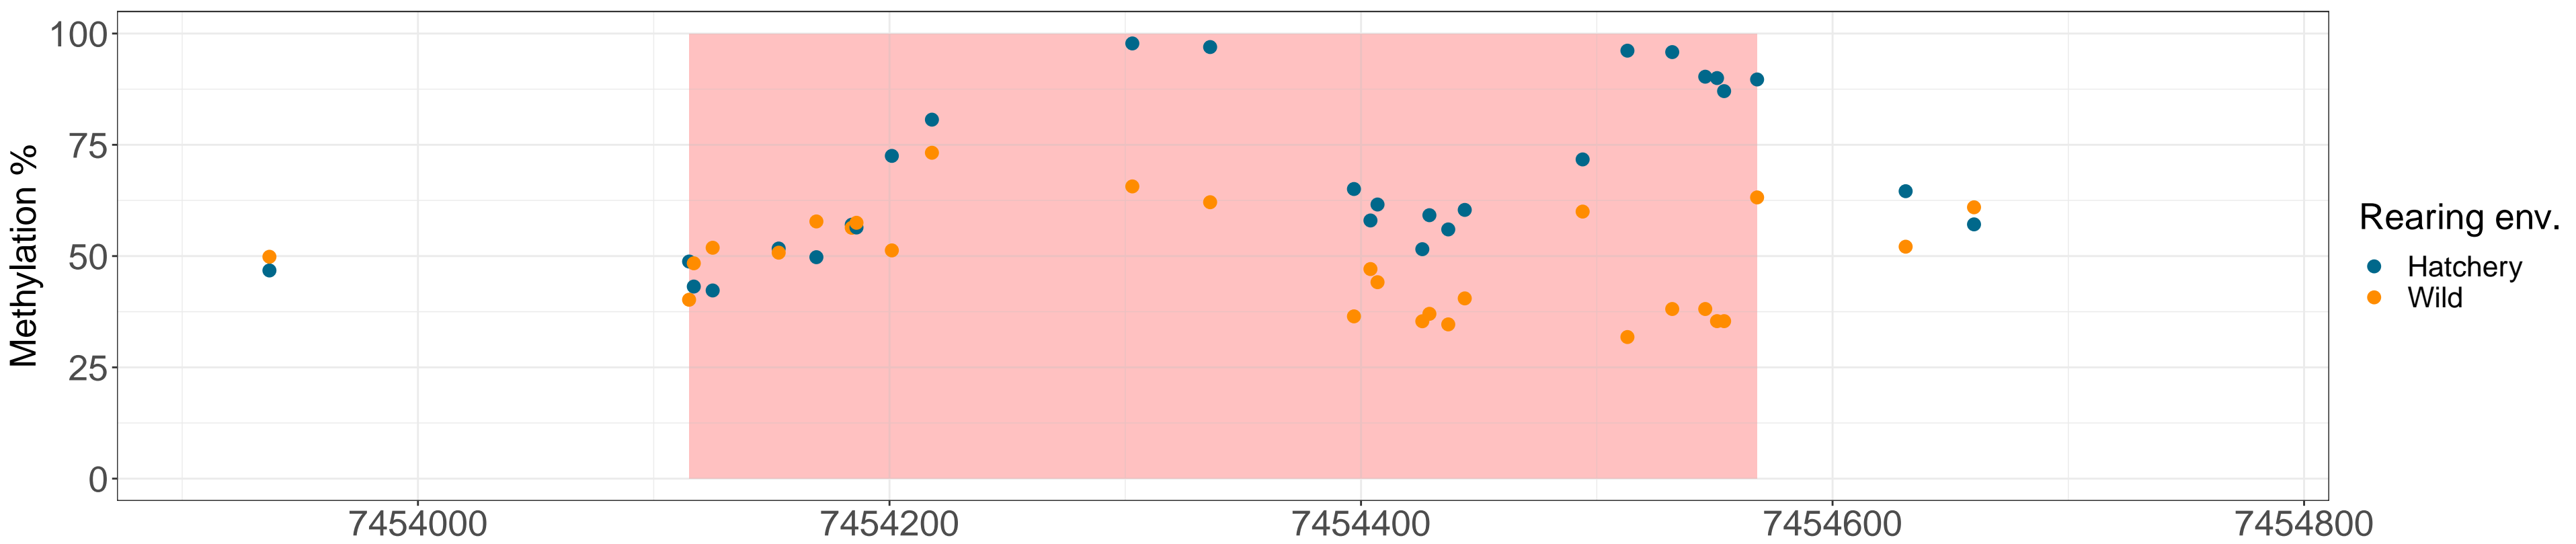**B**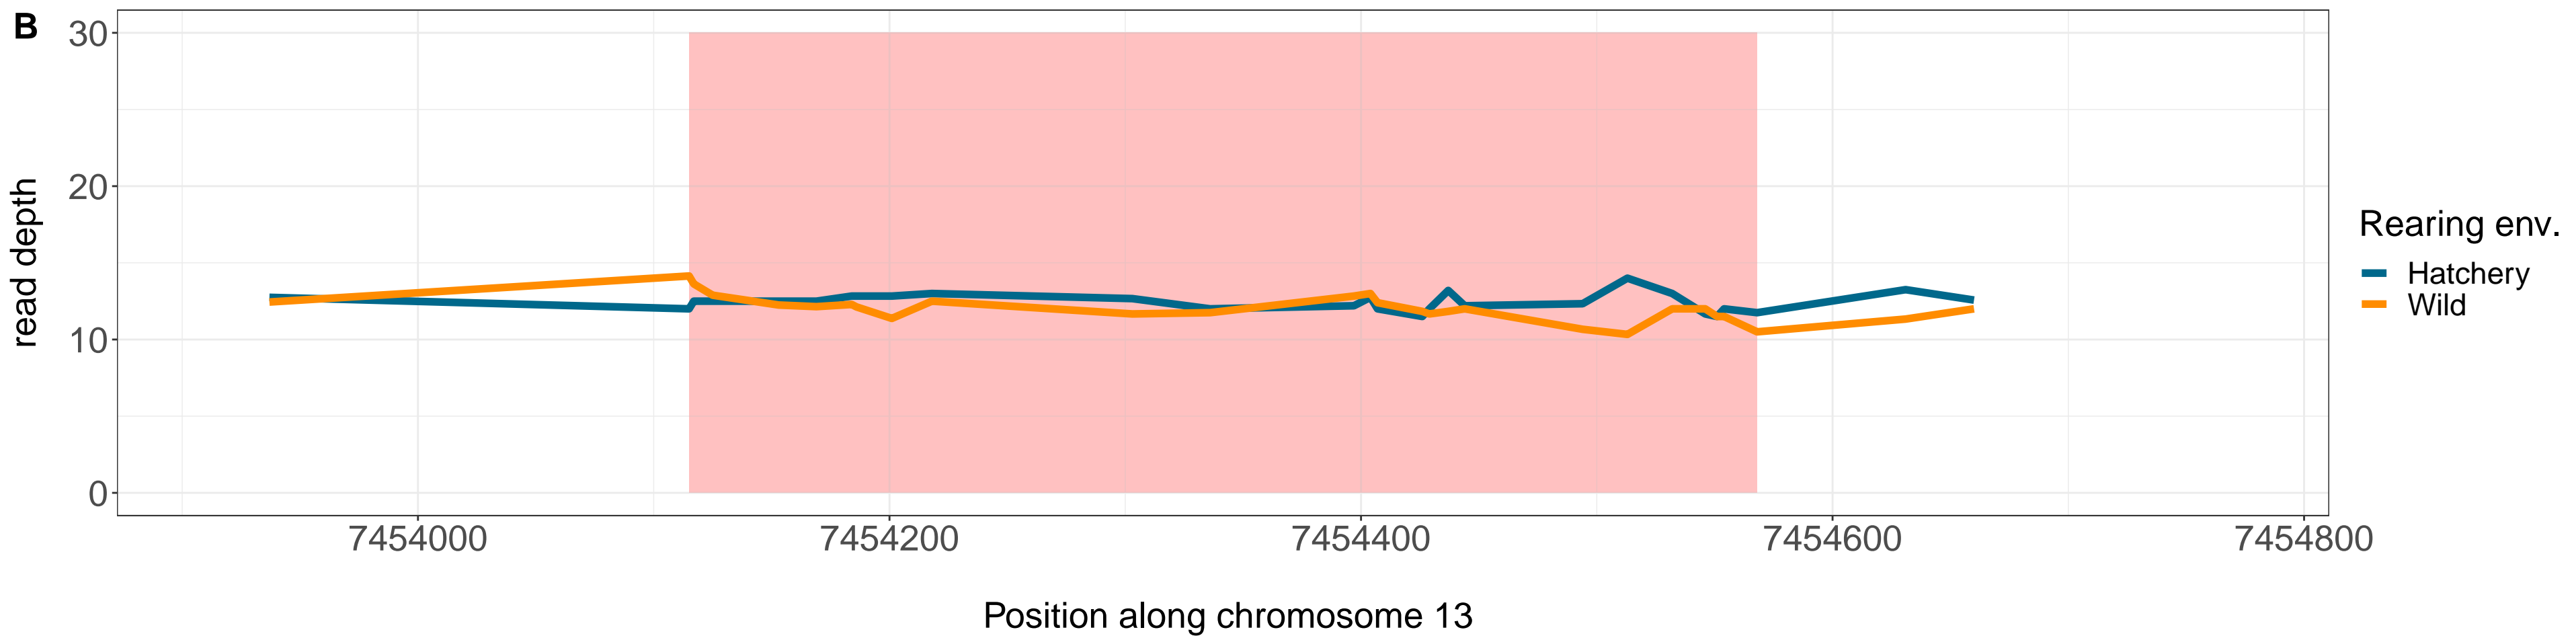

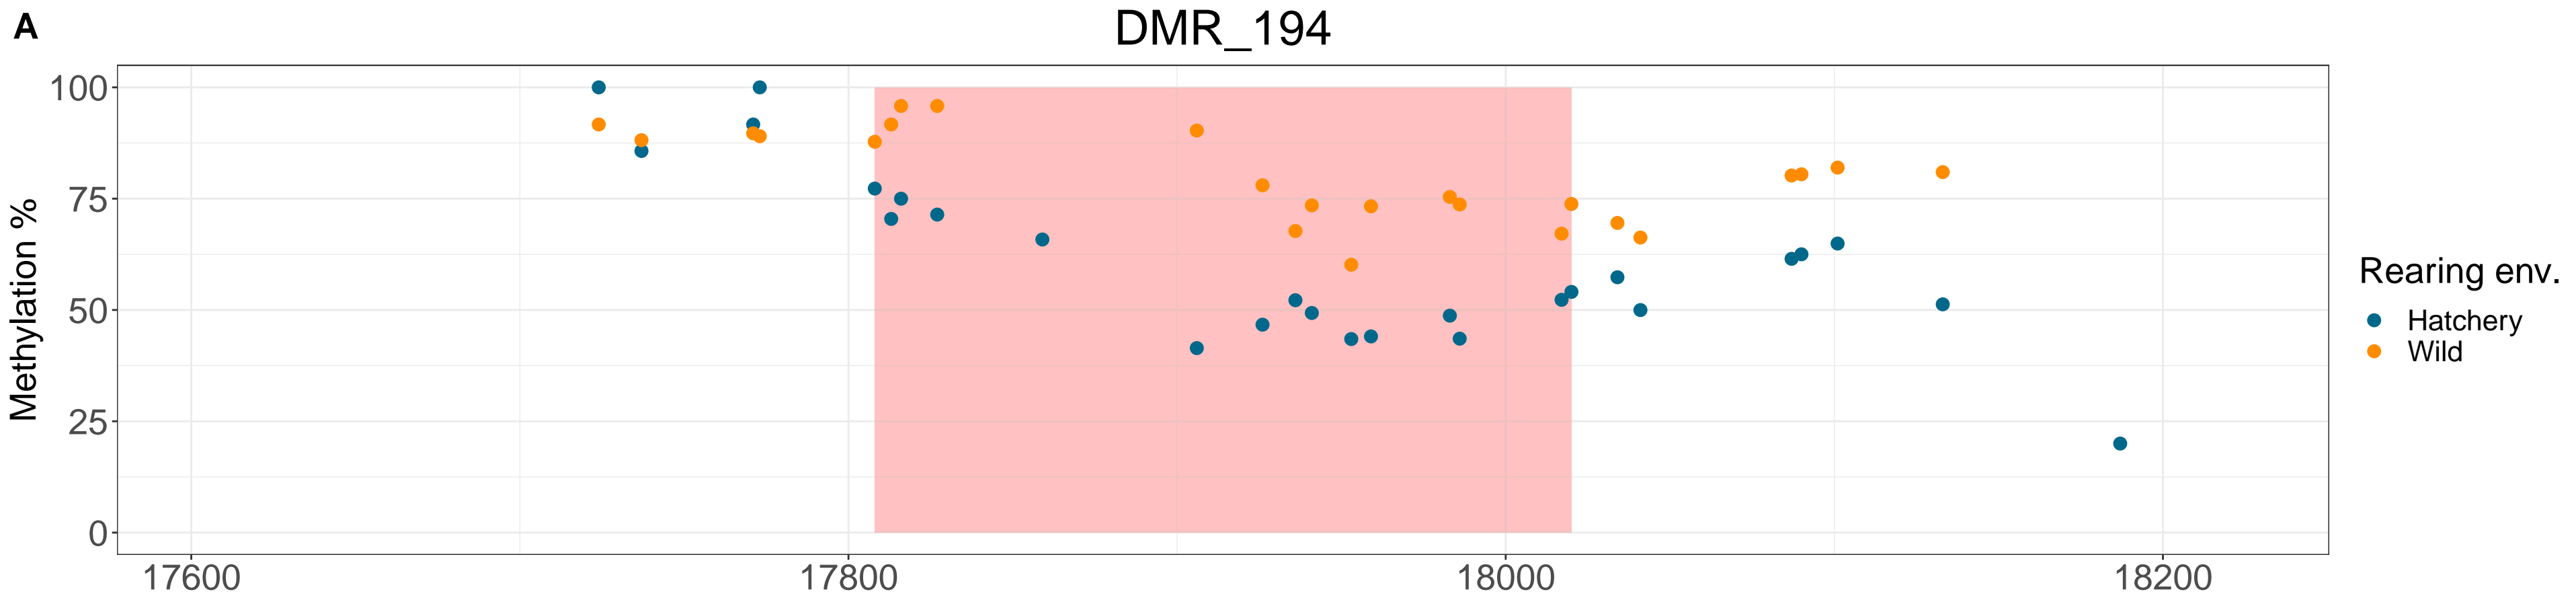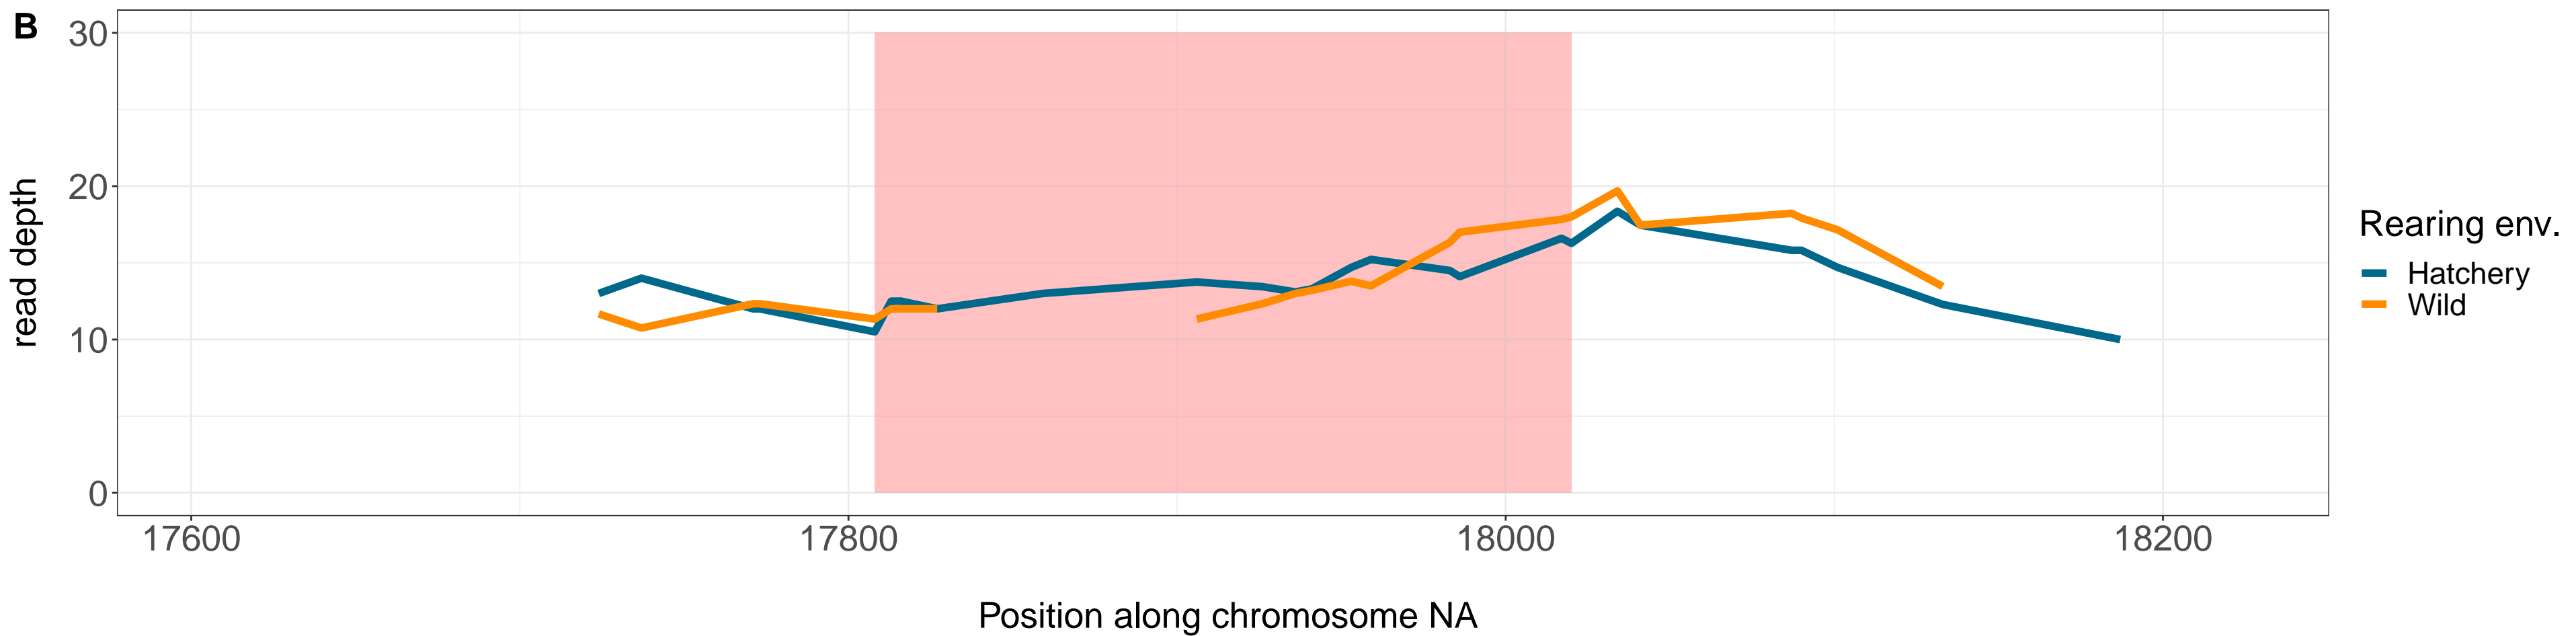

**A**

## DMR\_196

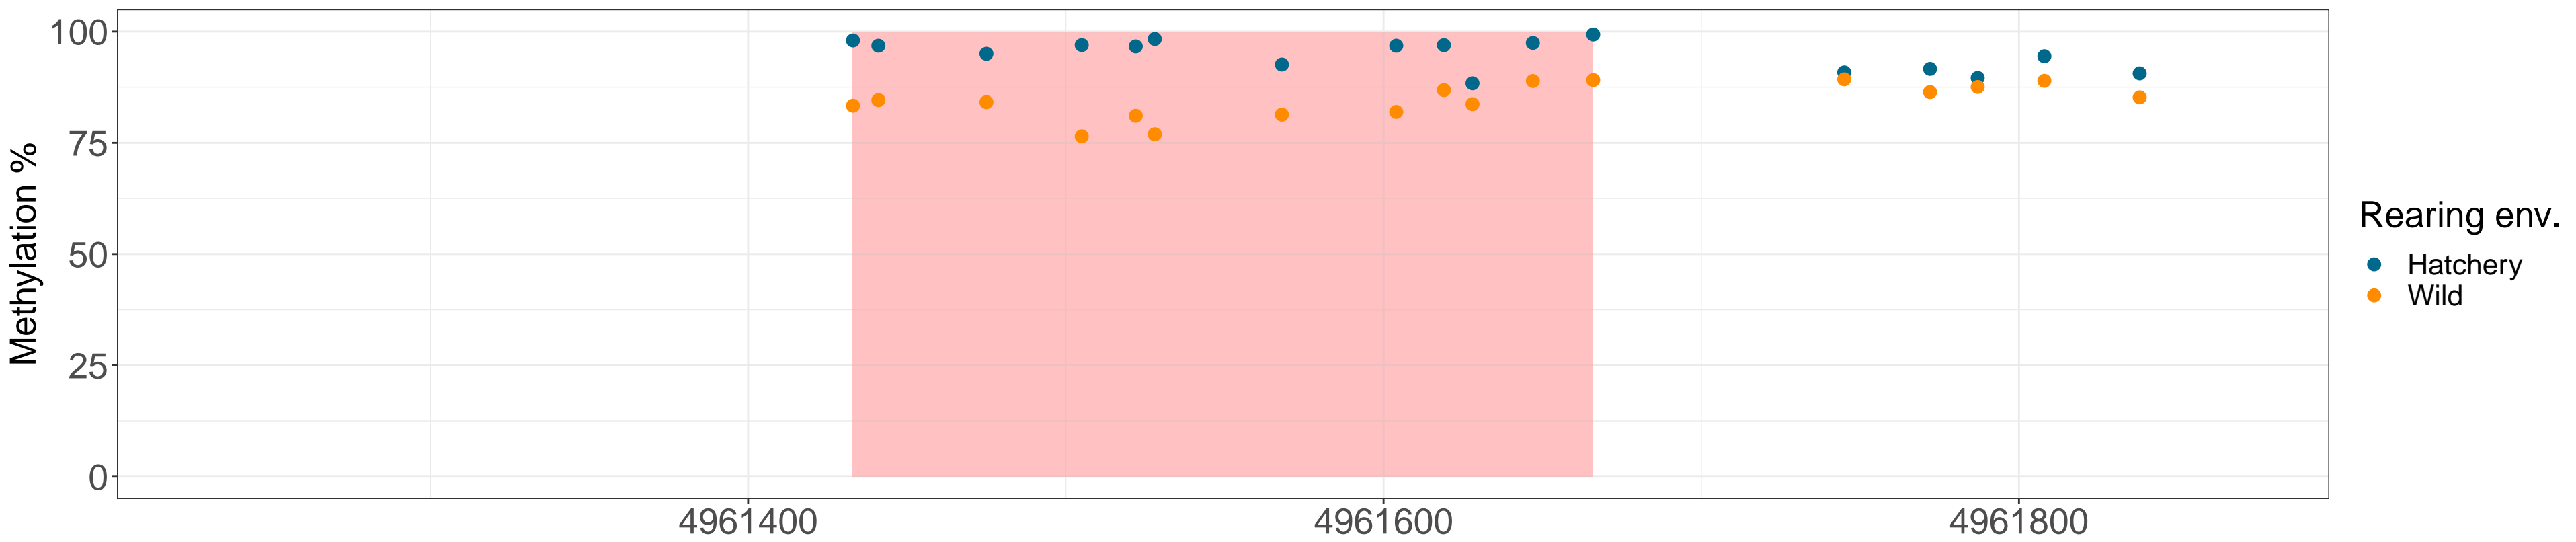**B**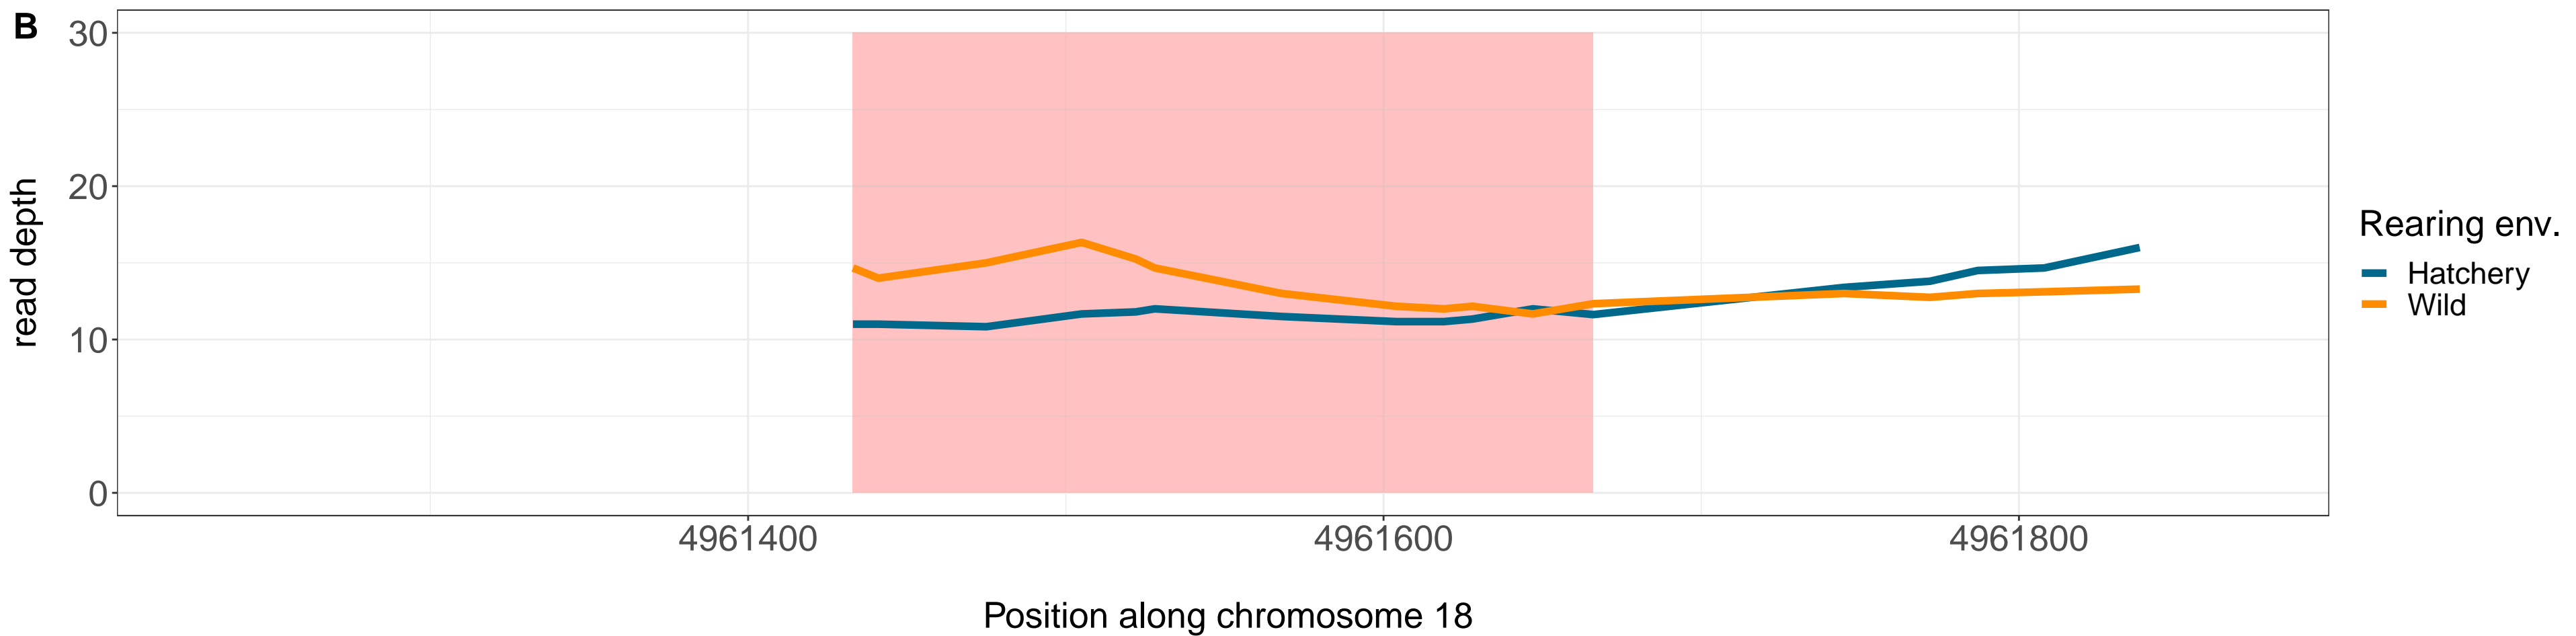

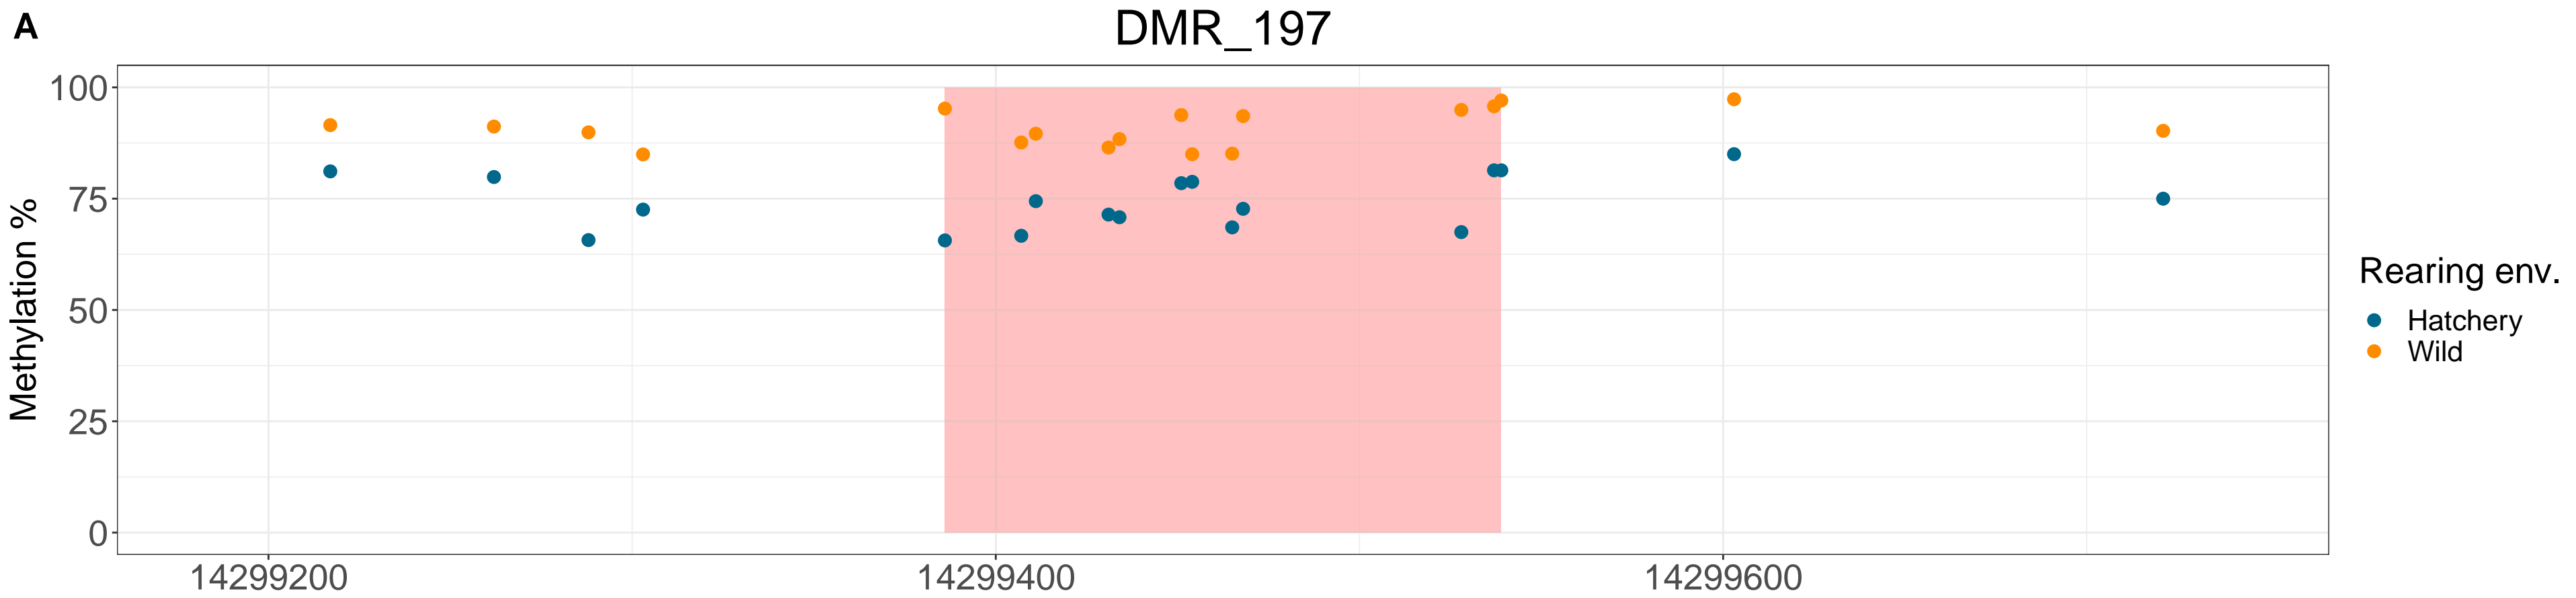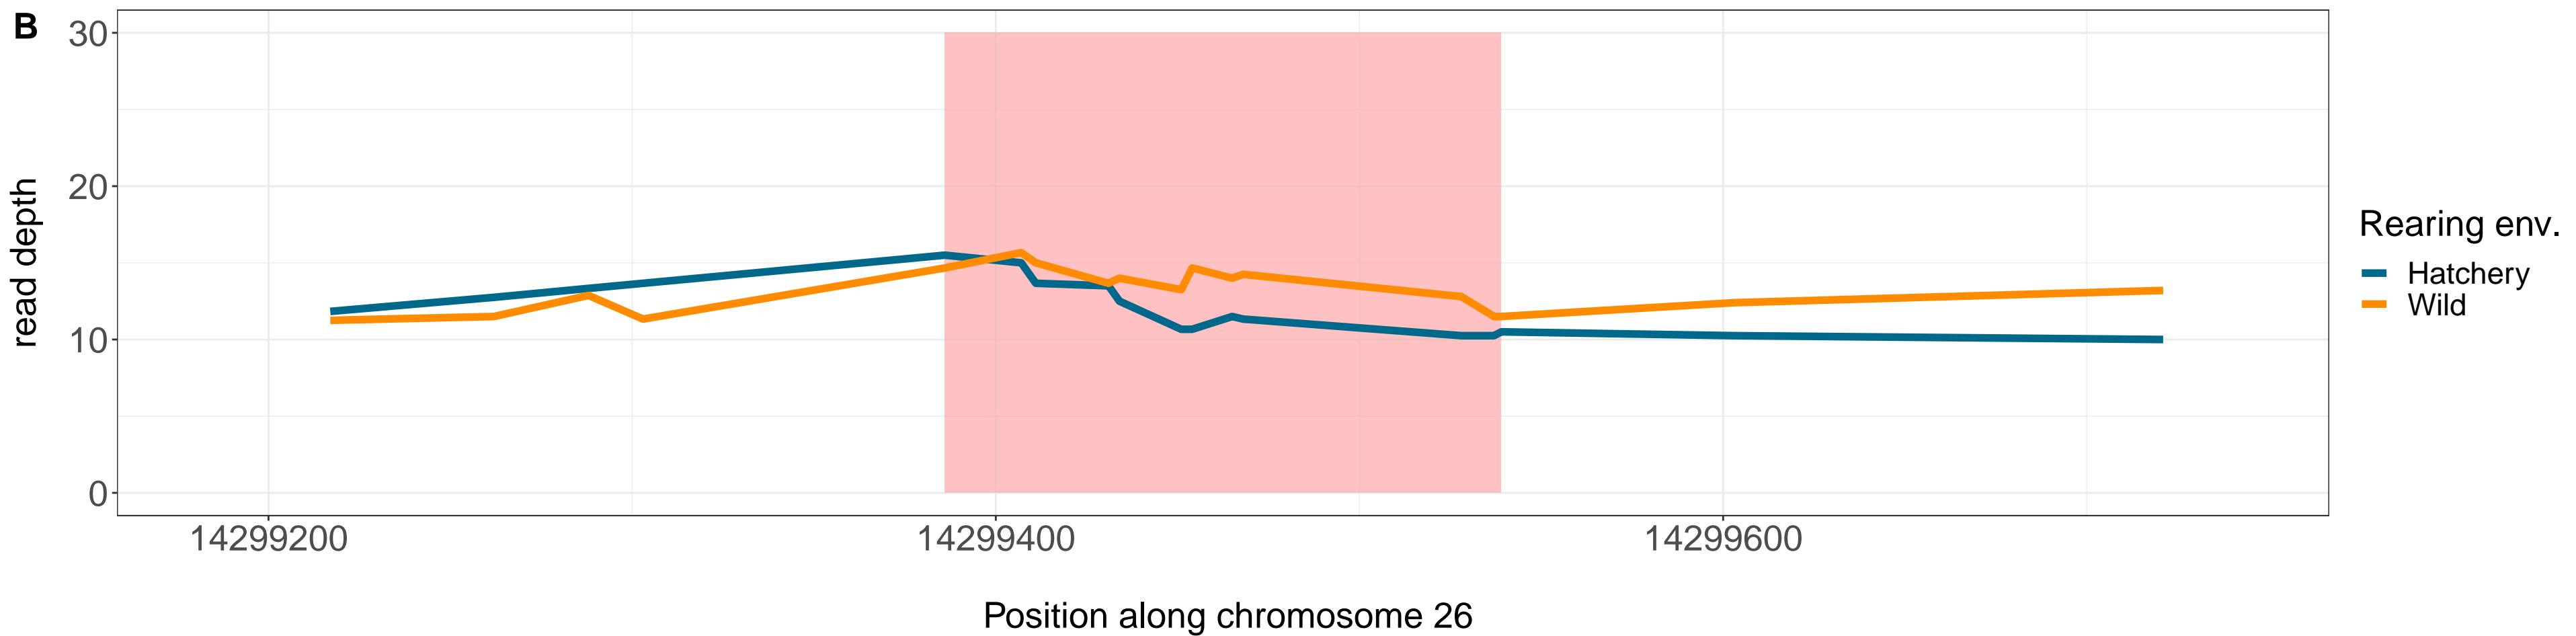

# DMR\_198

XM\_020503164.1

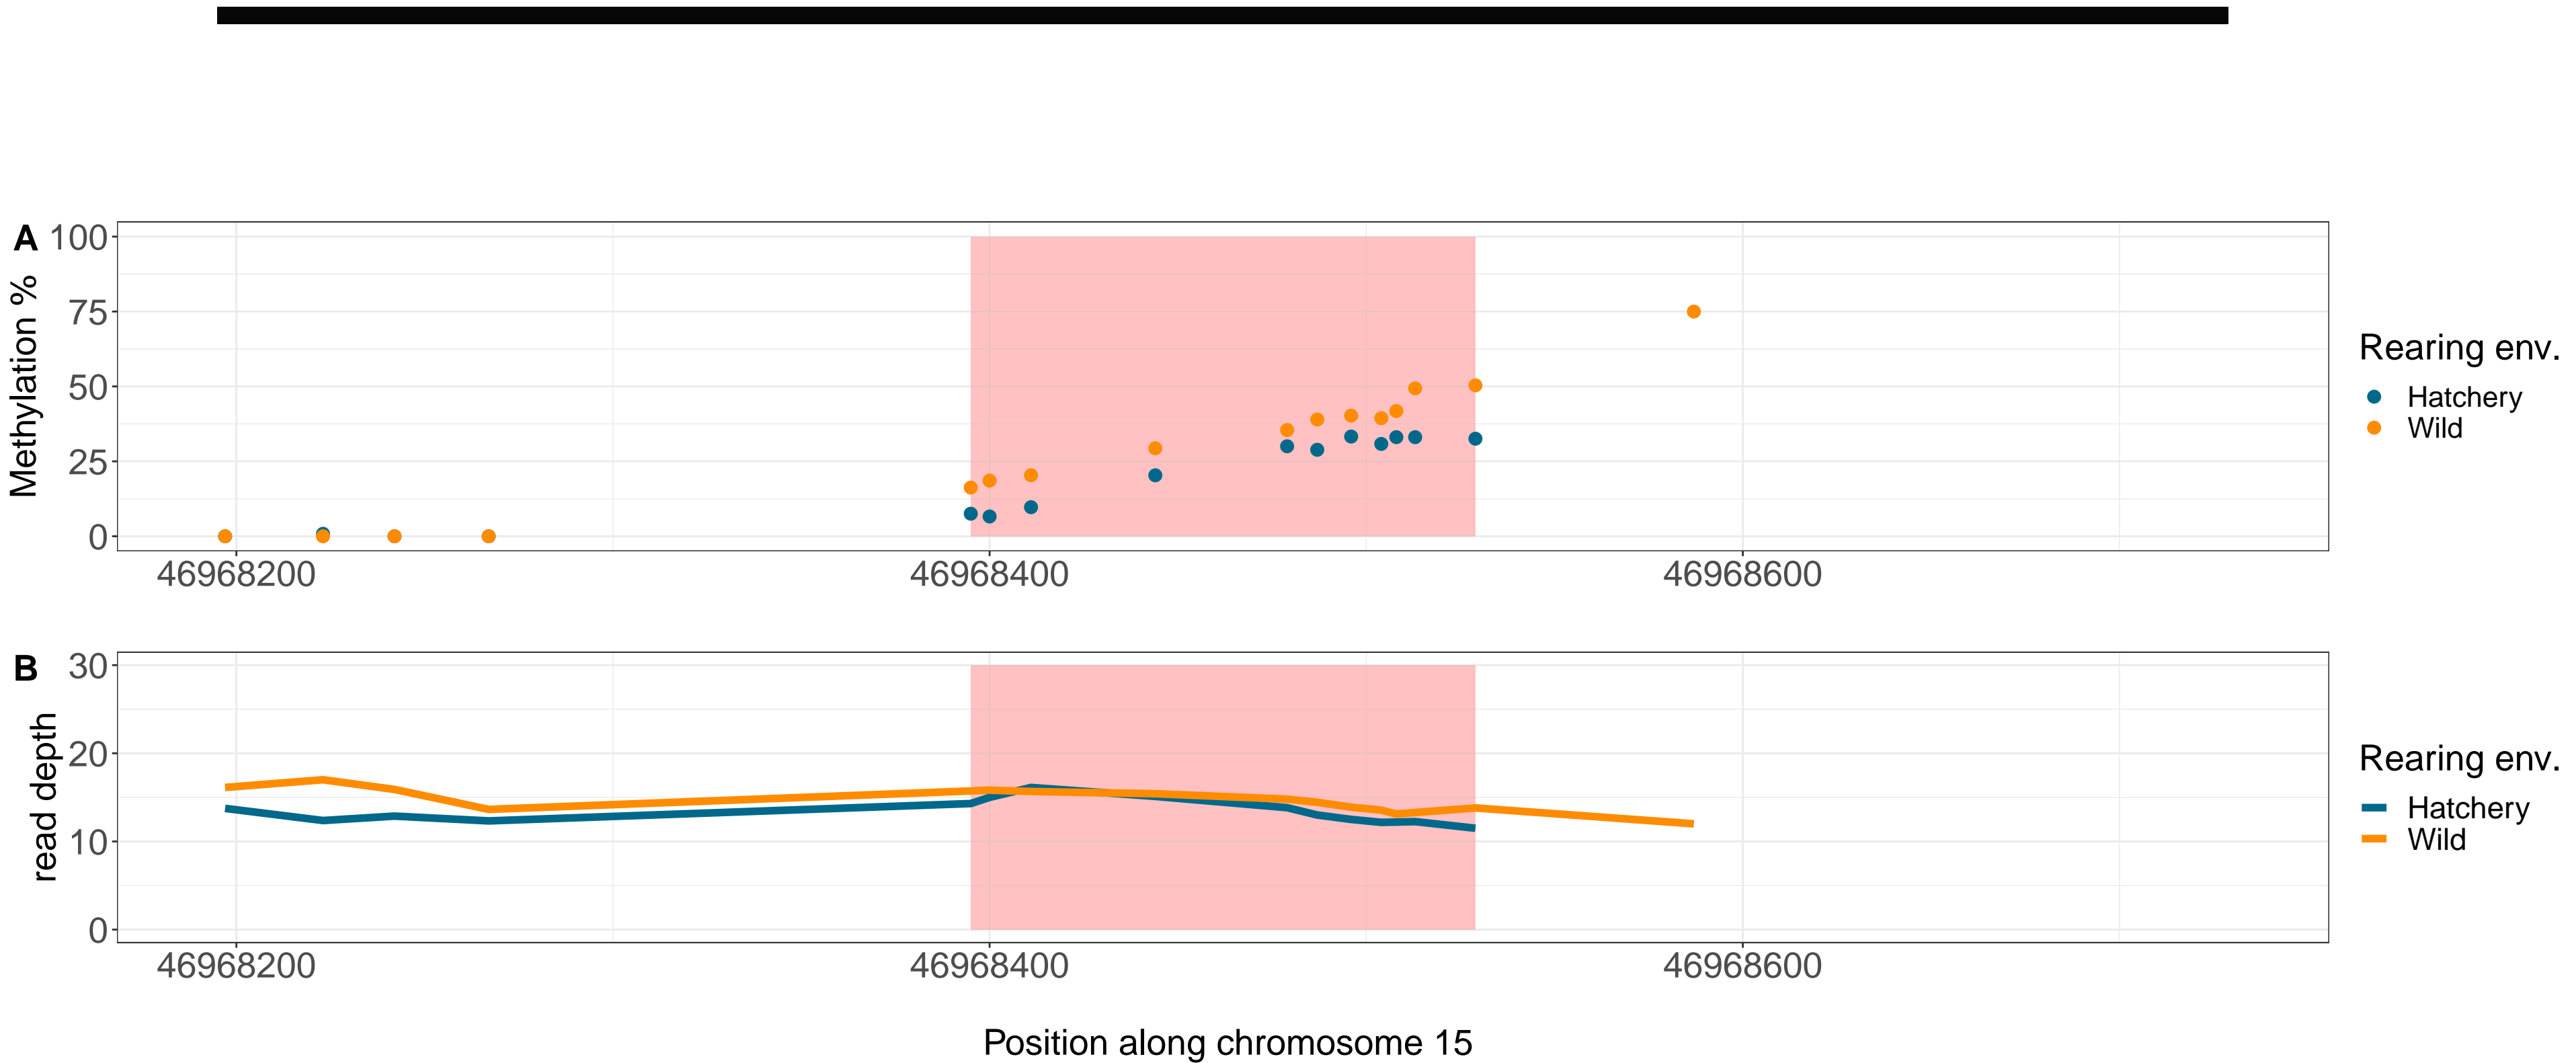

# DMR\_199

XM\_020497701.1

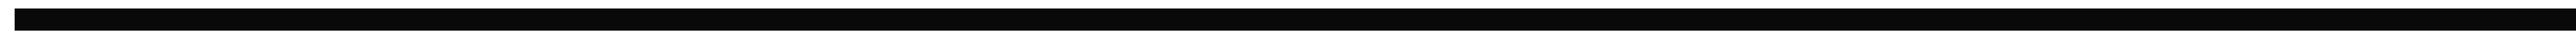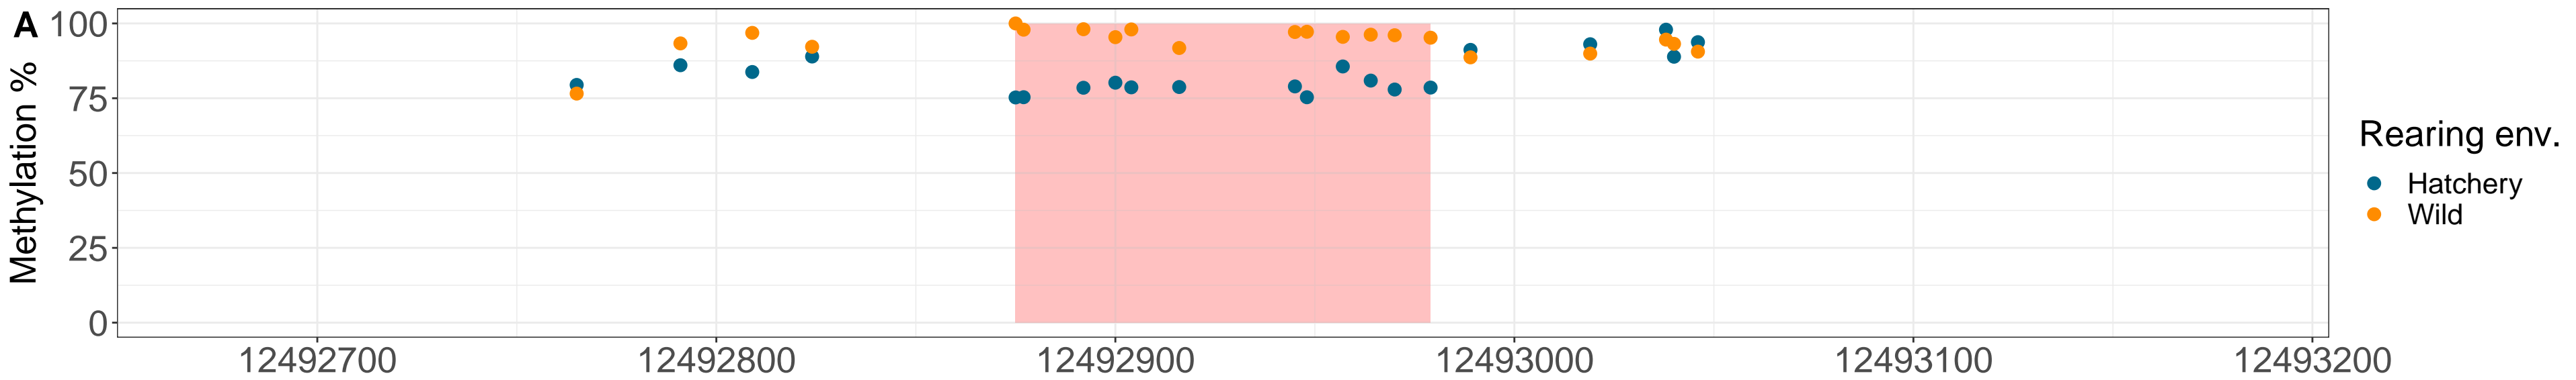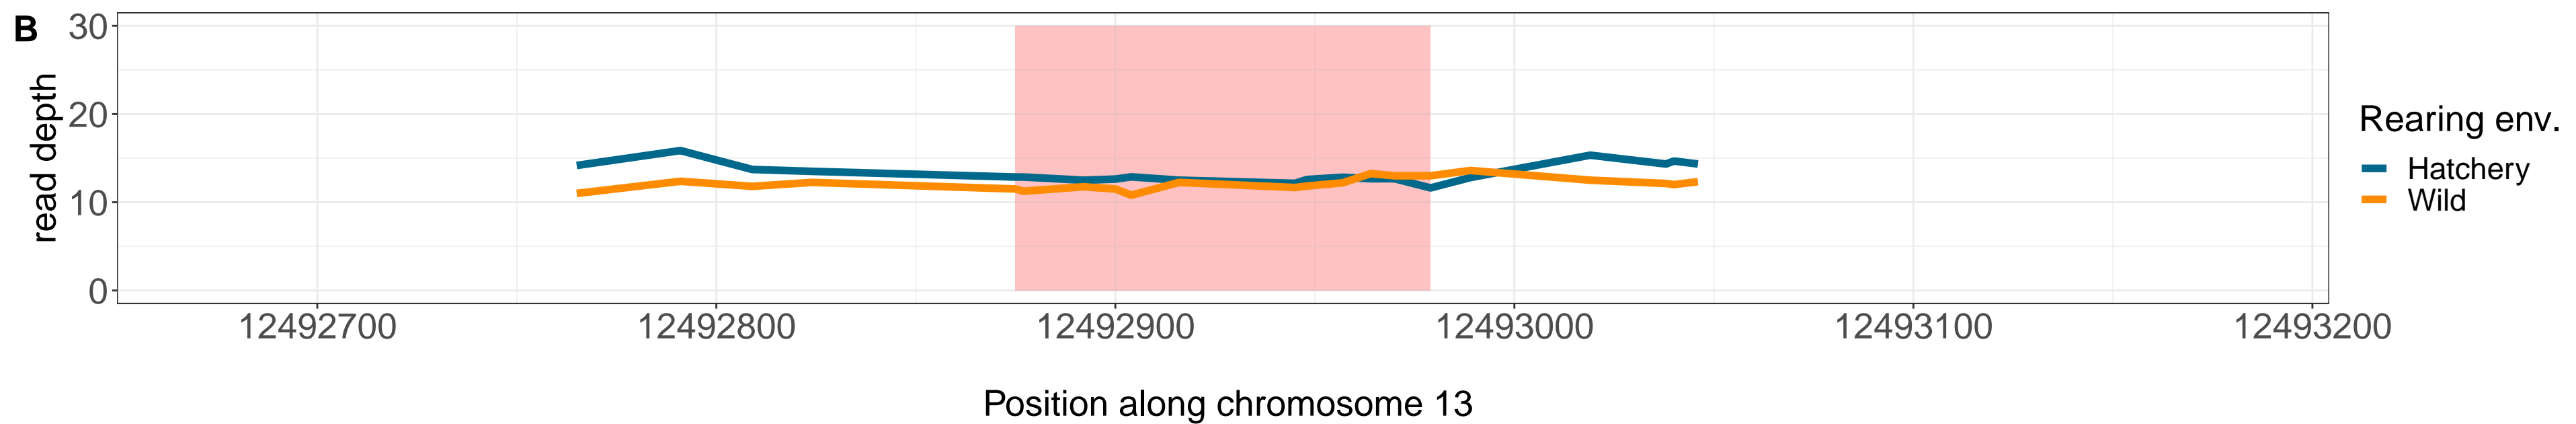



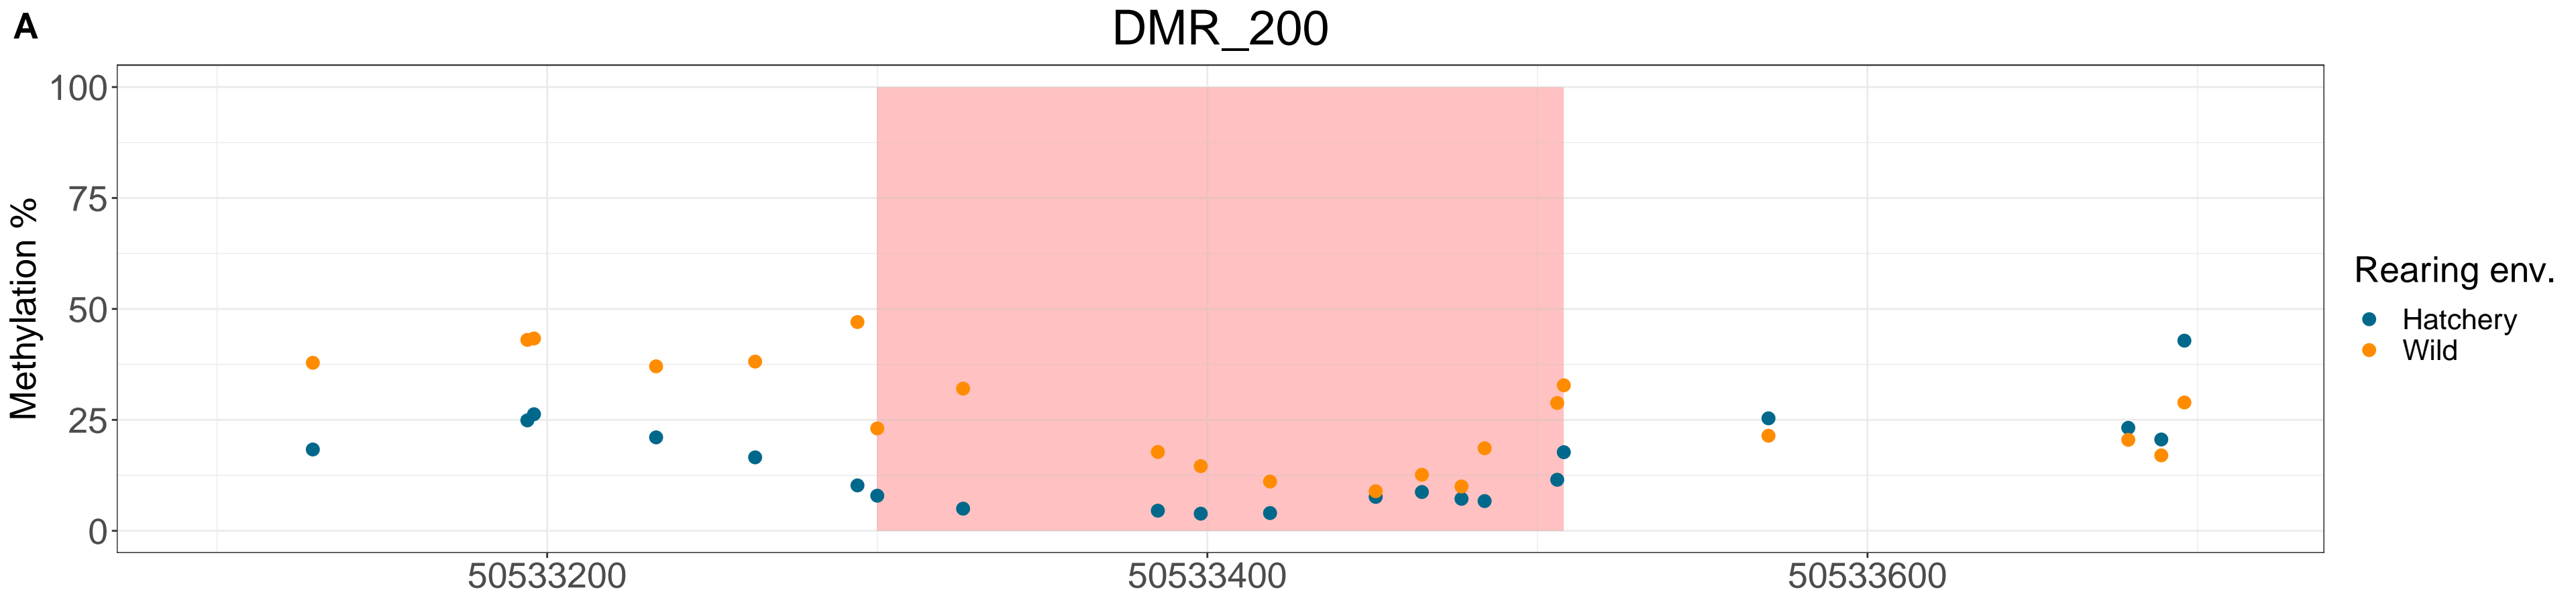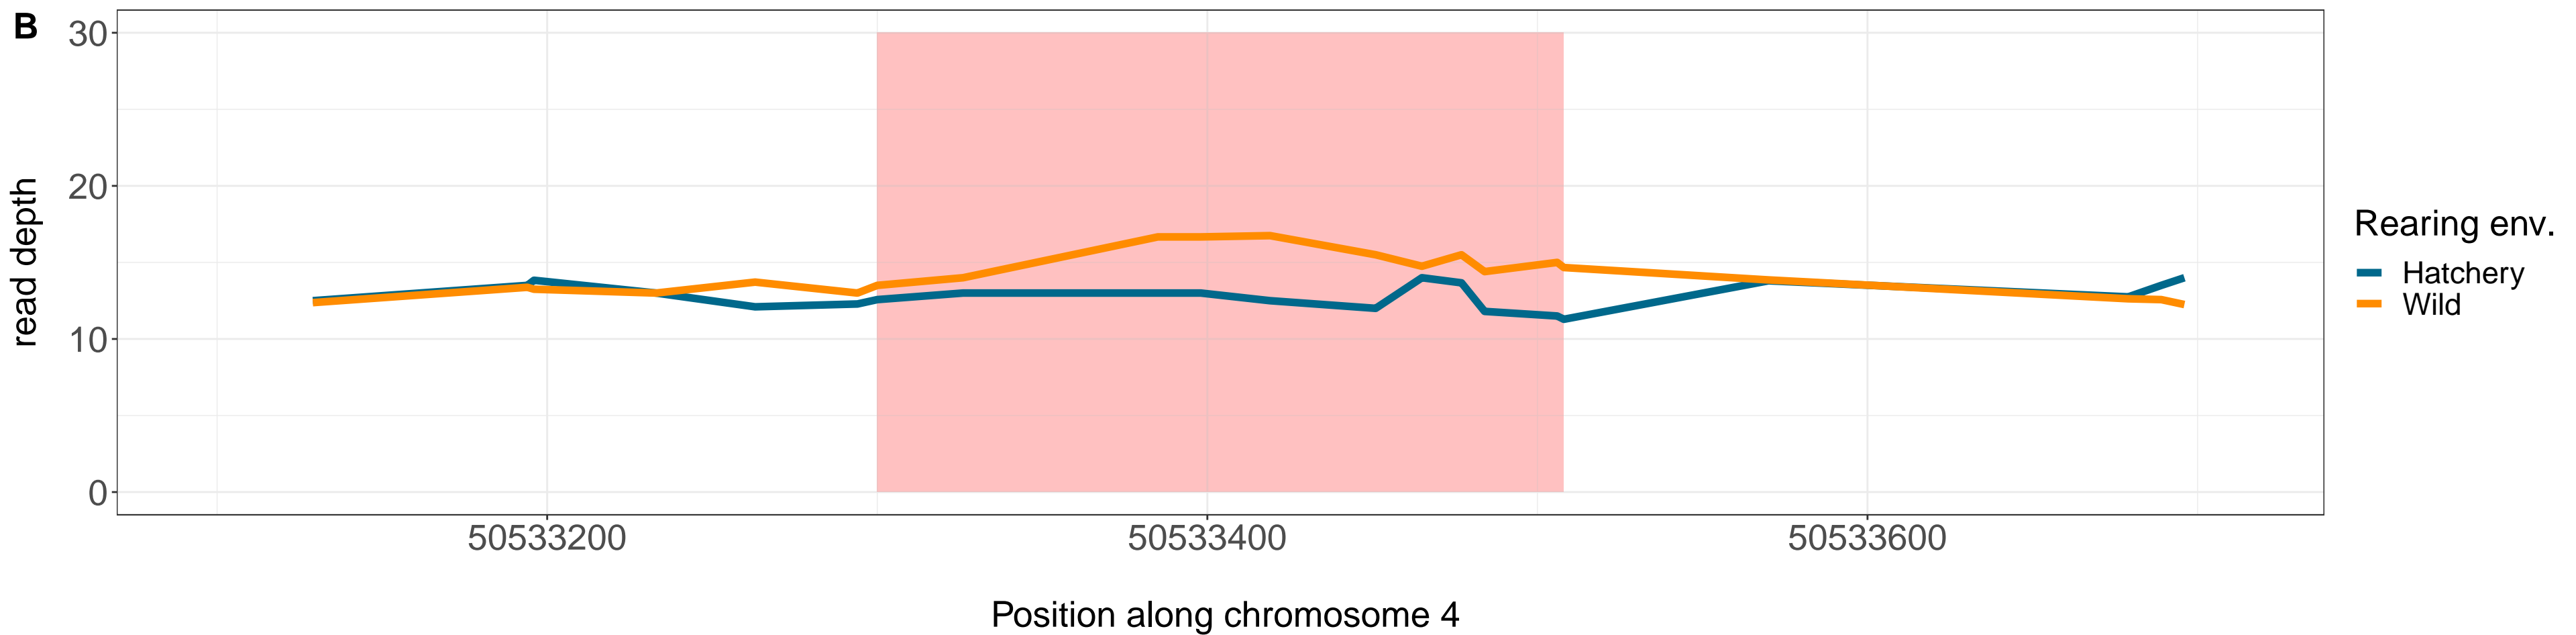

# DMR\_203

XM\_020476867.1

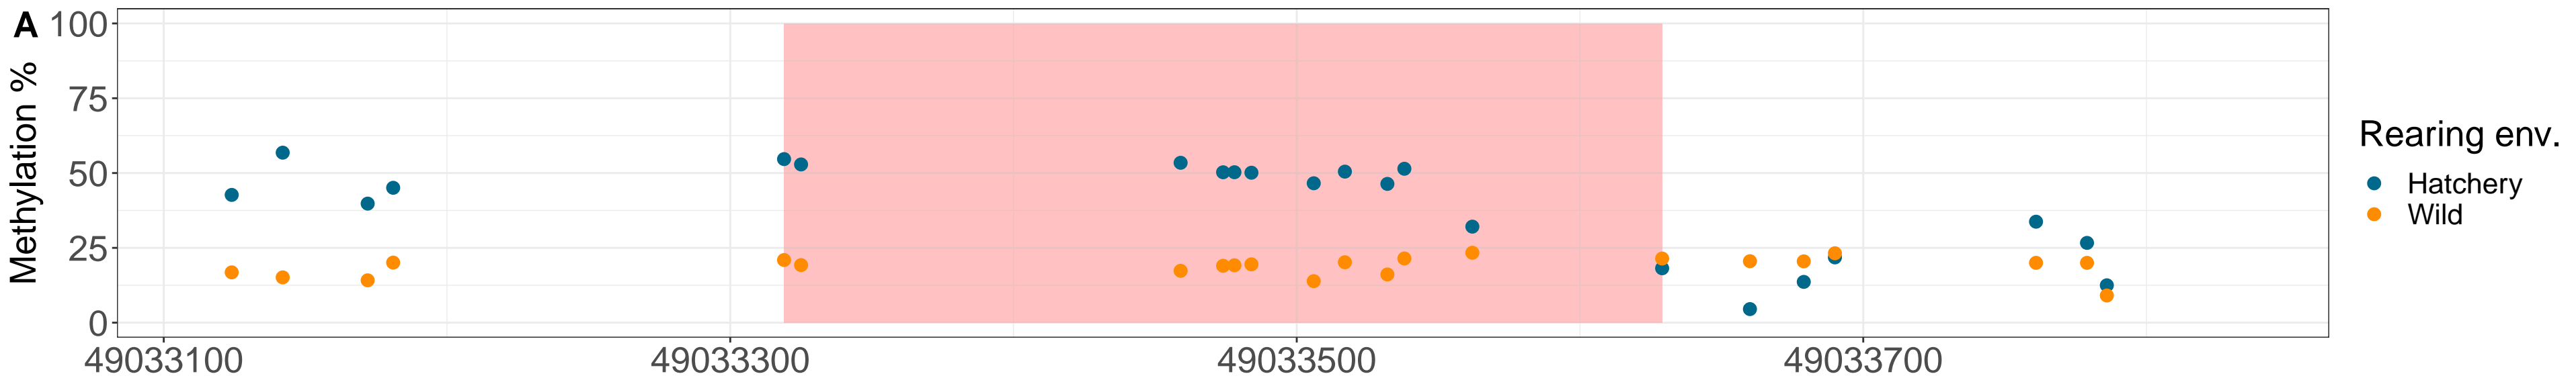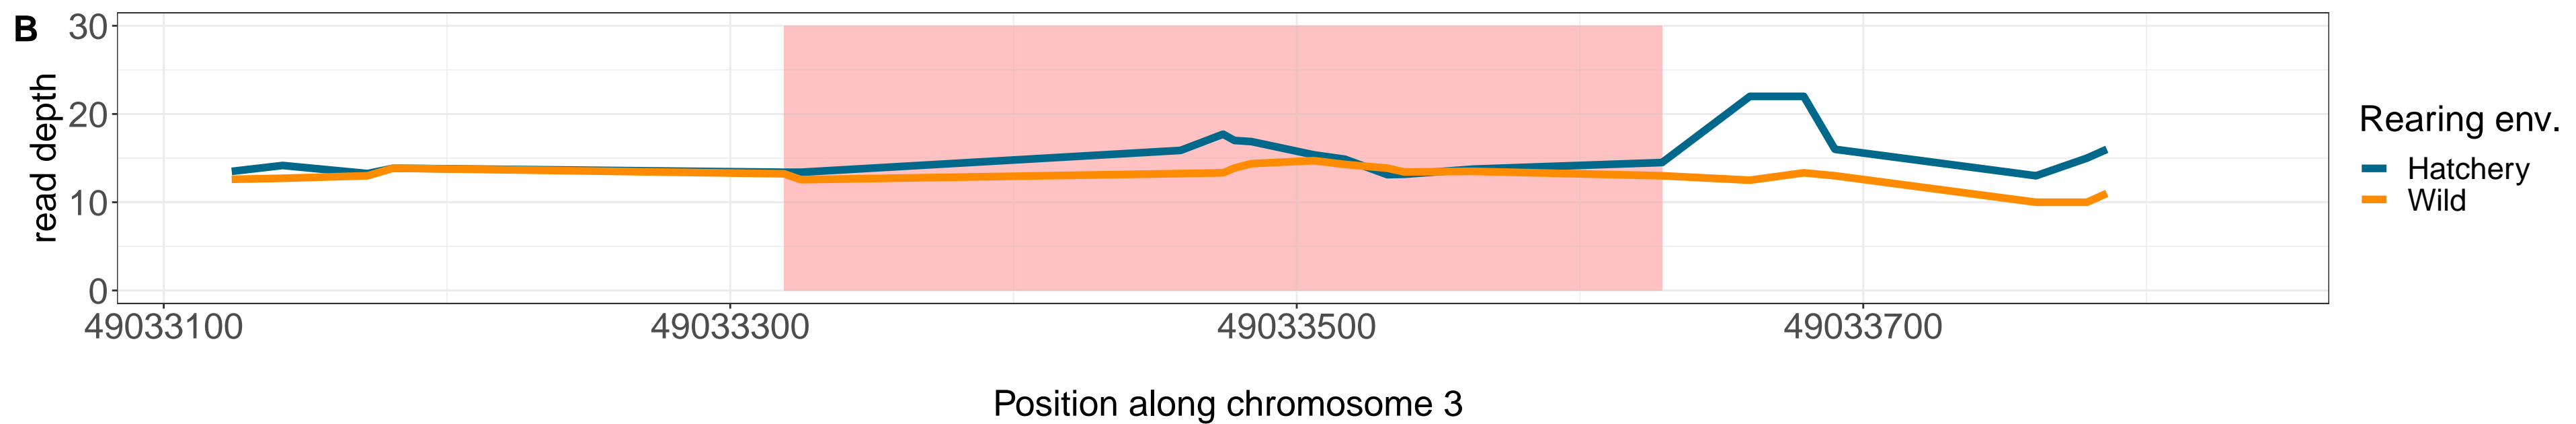

**A**

## DMR\_205

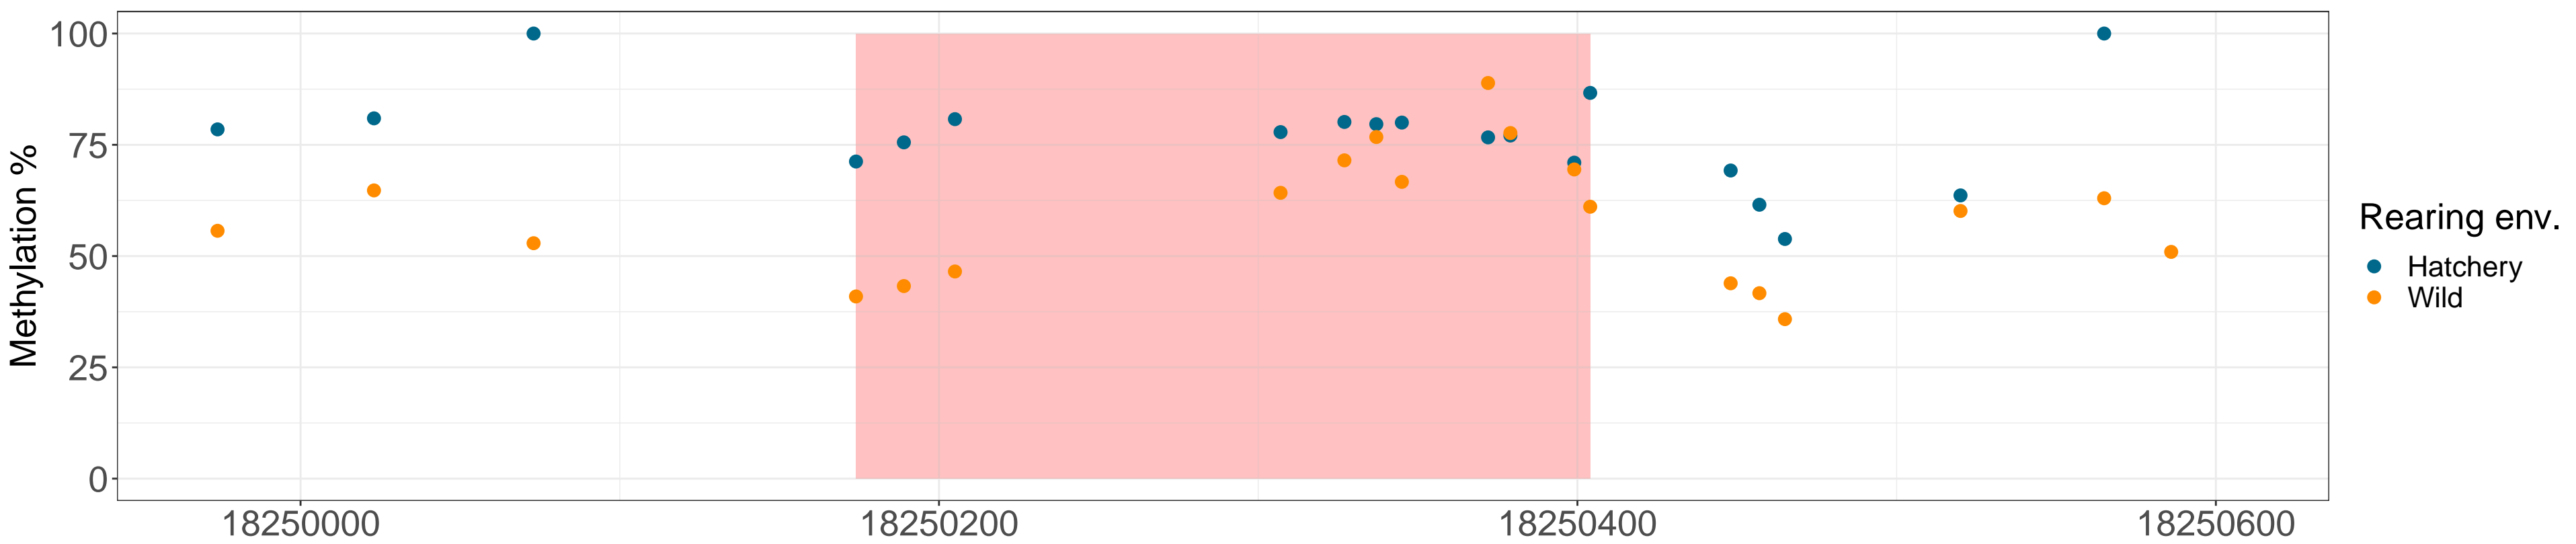**B**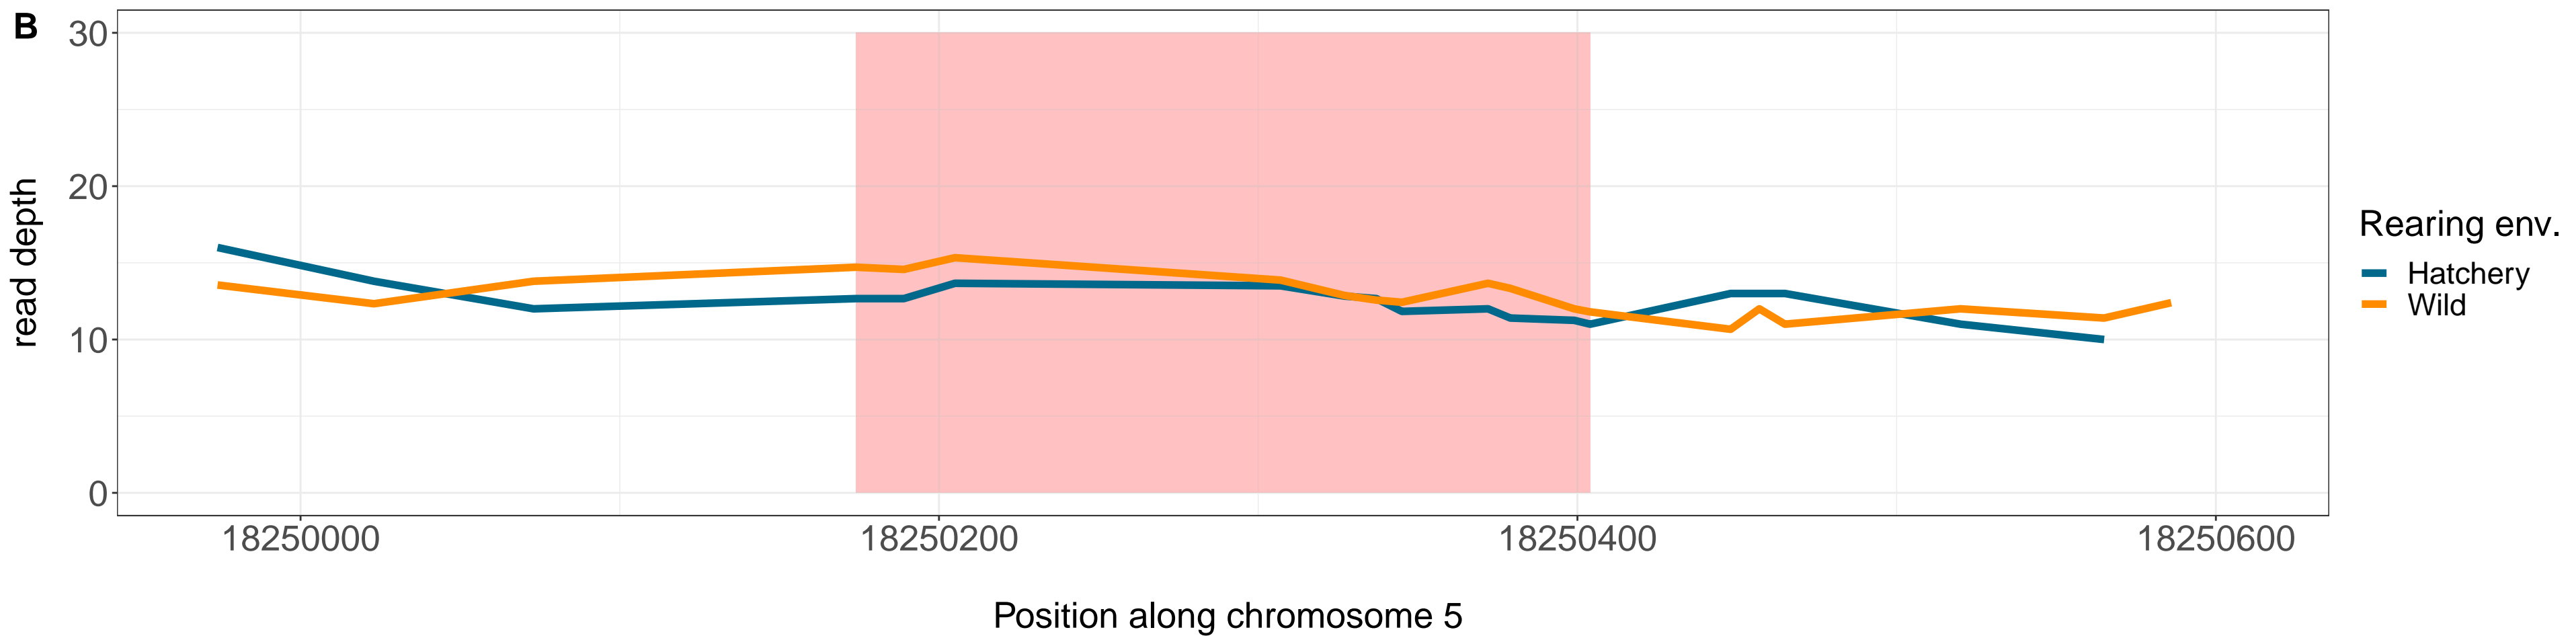

**A**

DMR\_207

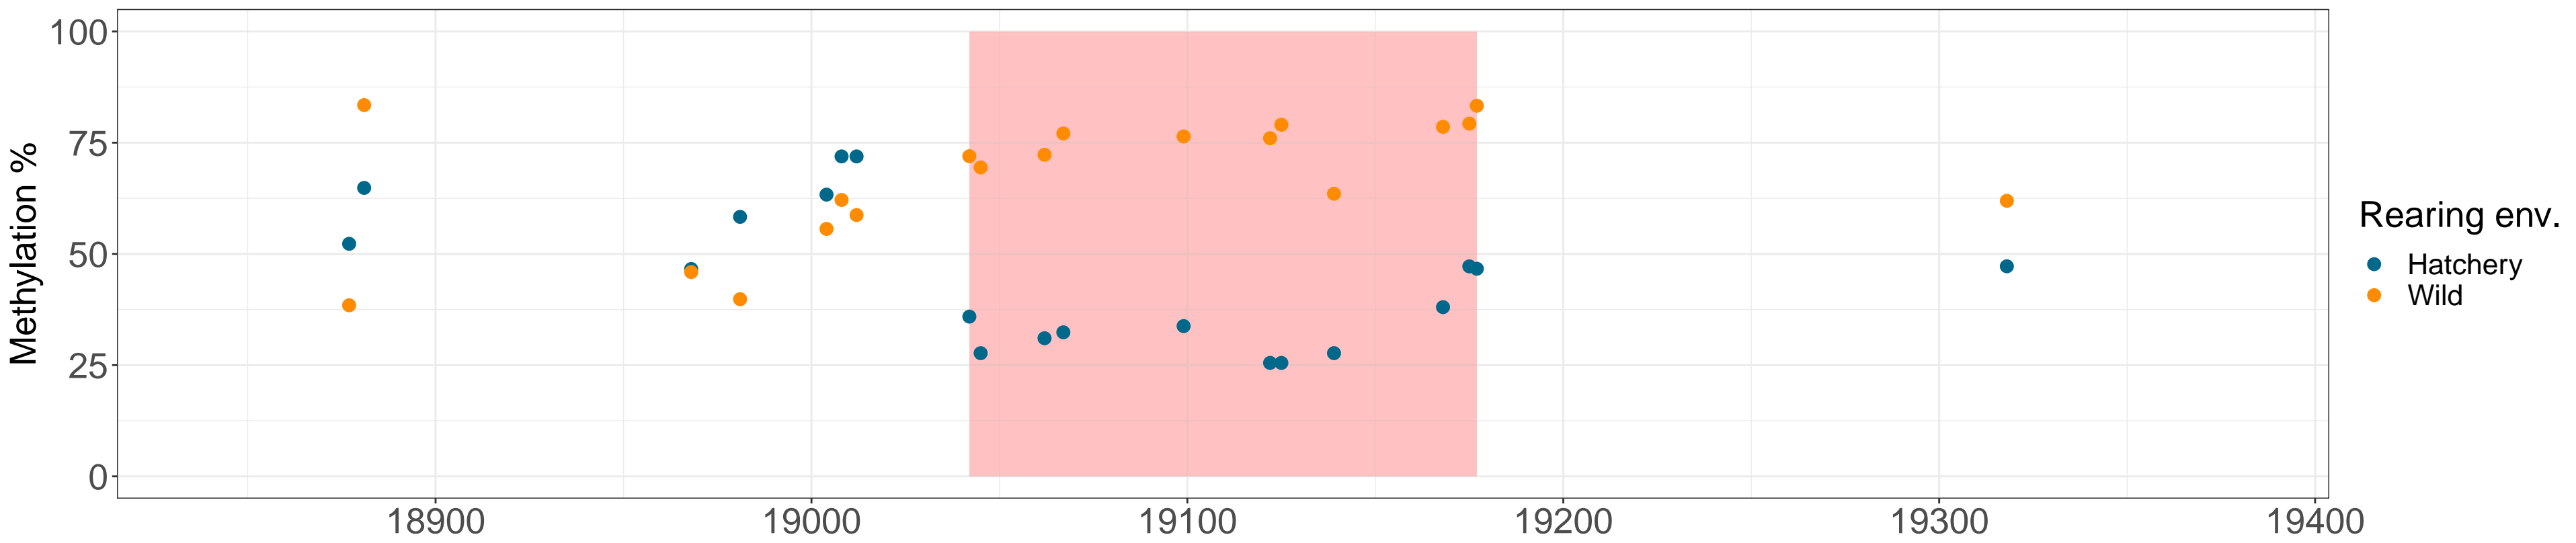**B**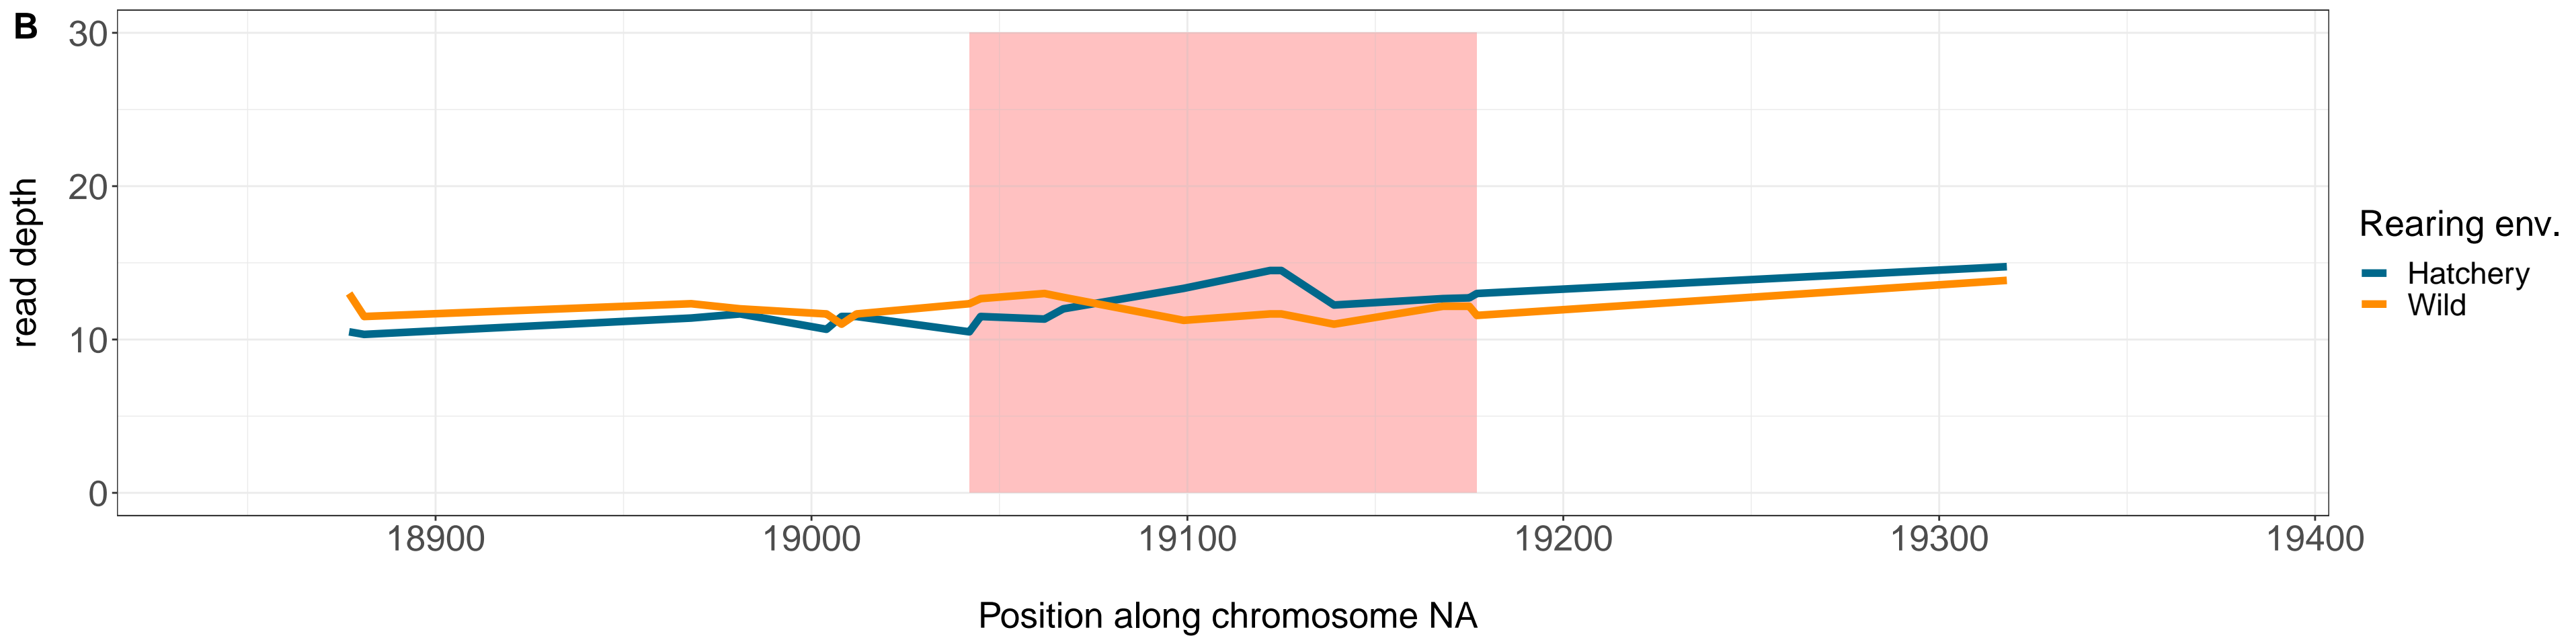

# DMR\_209

XM\_020483357.1

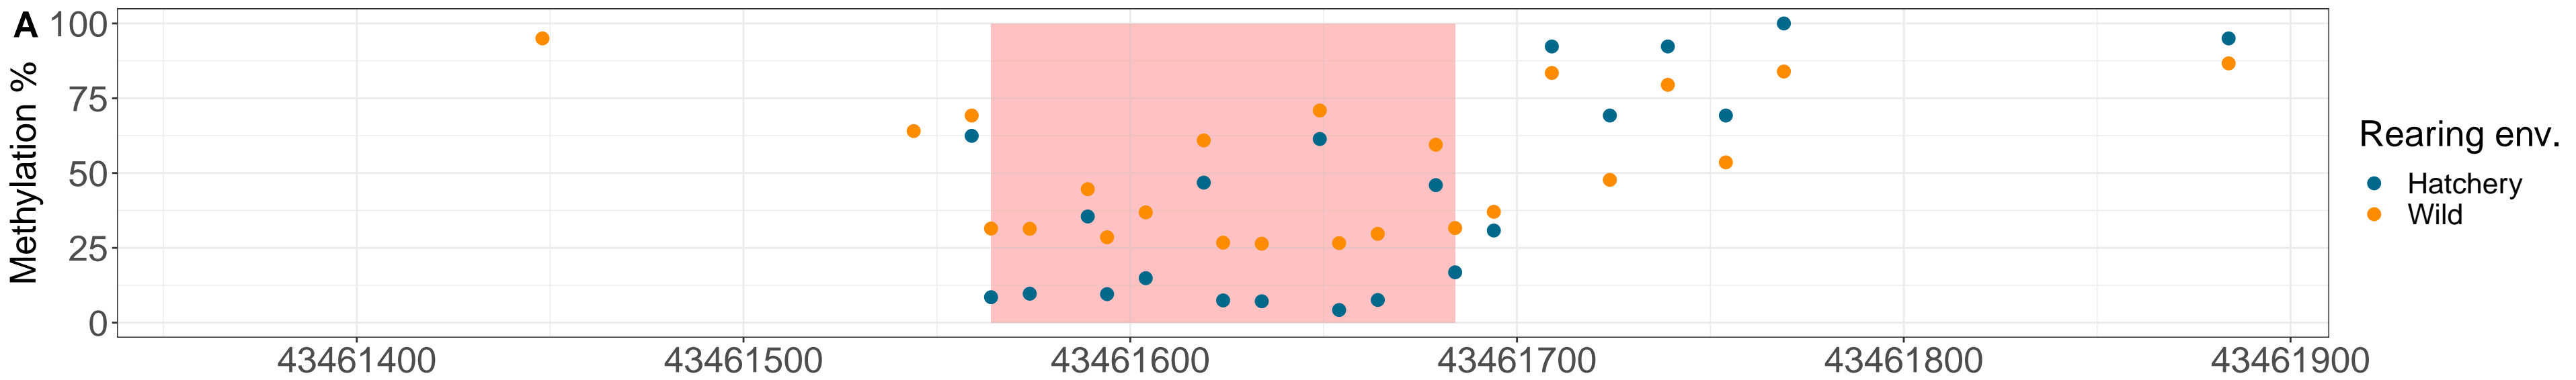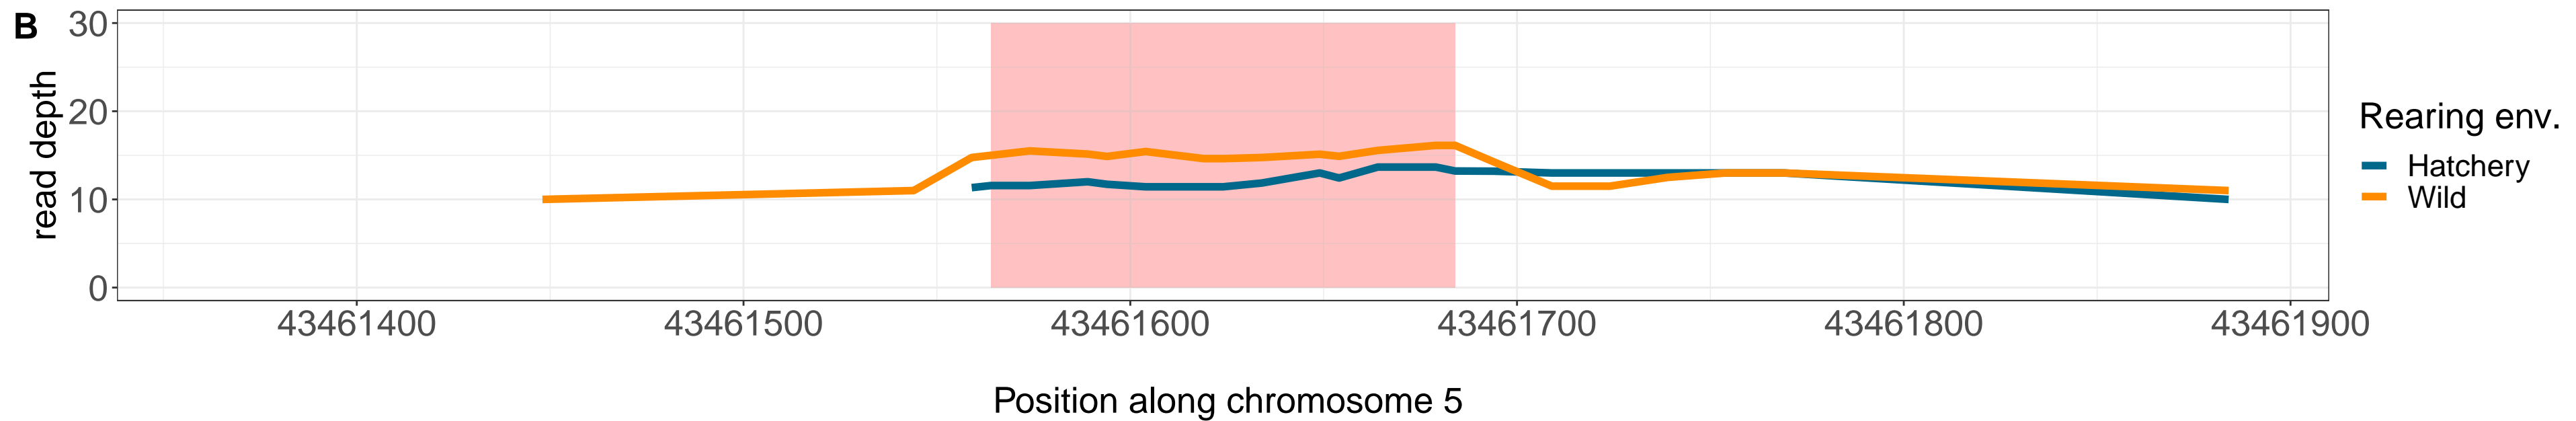

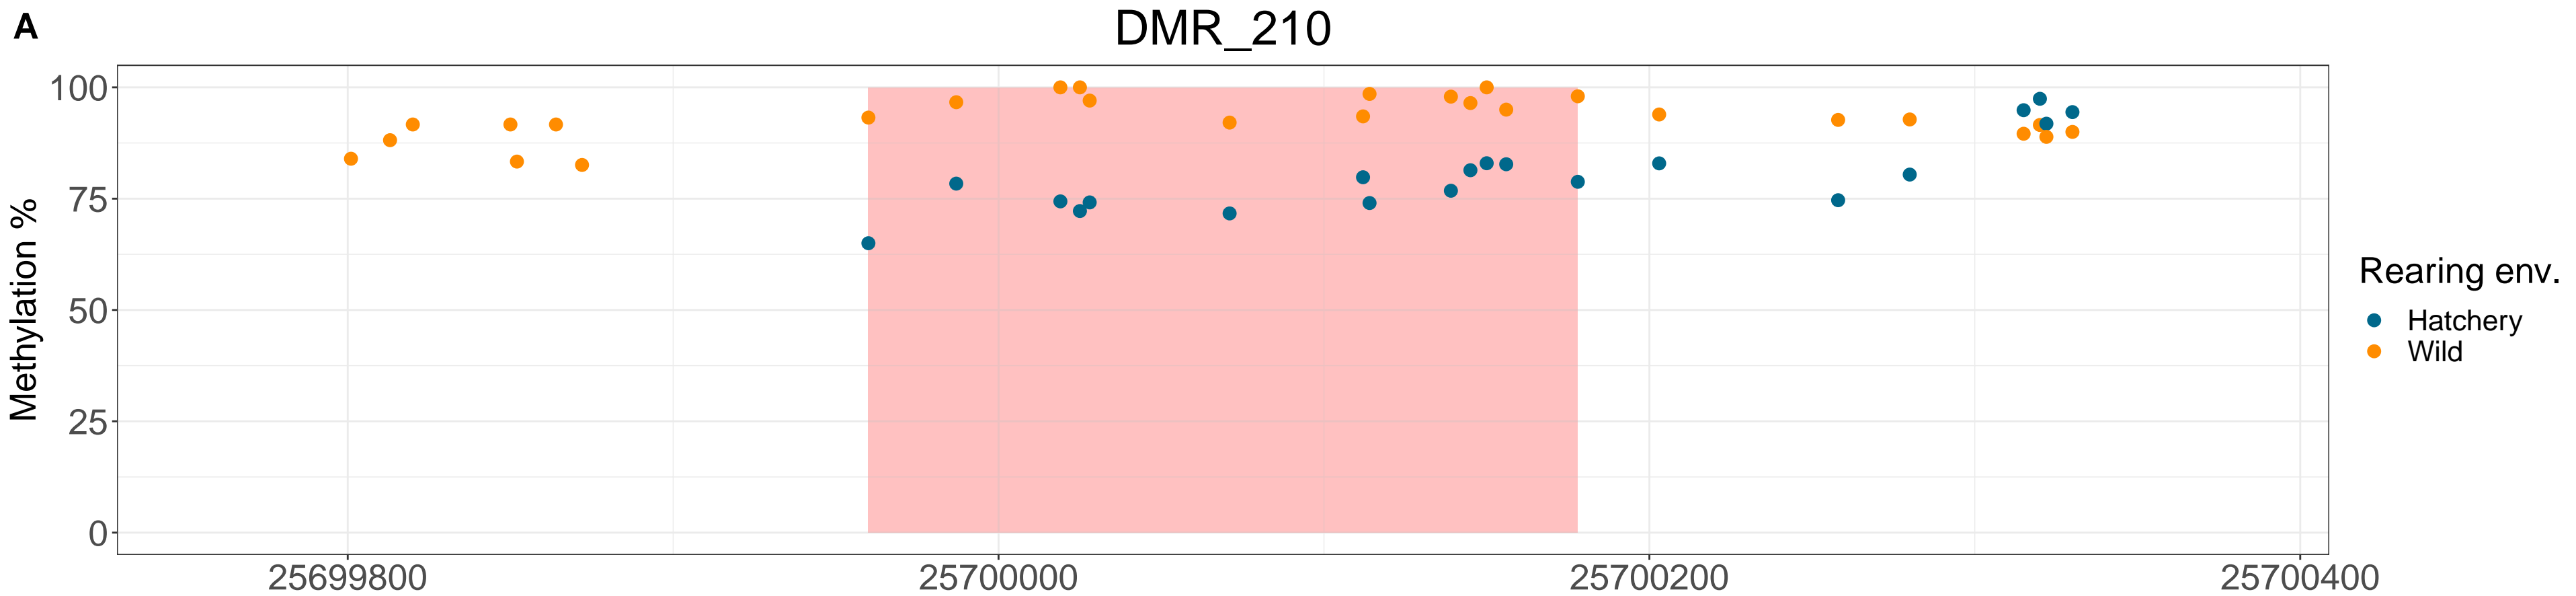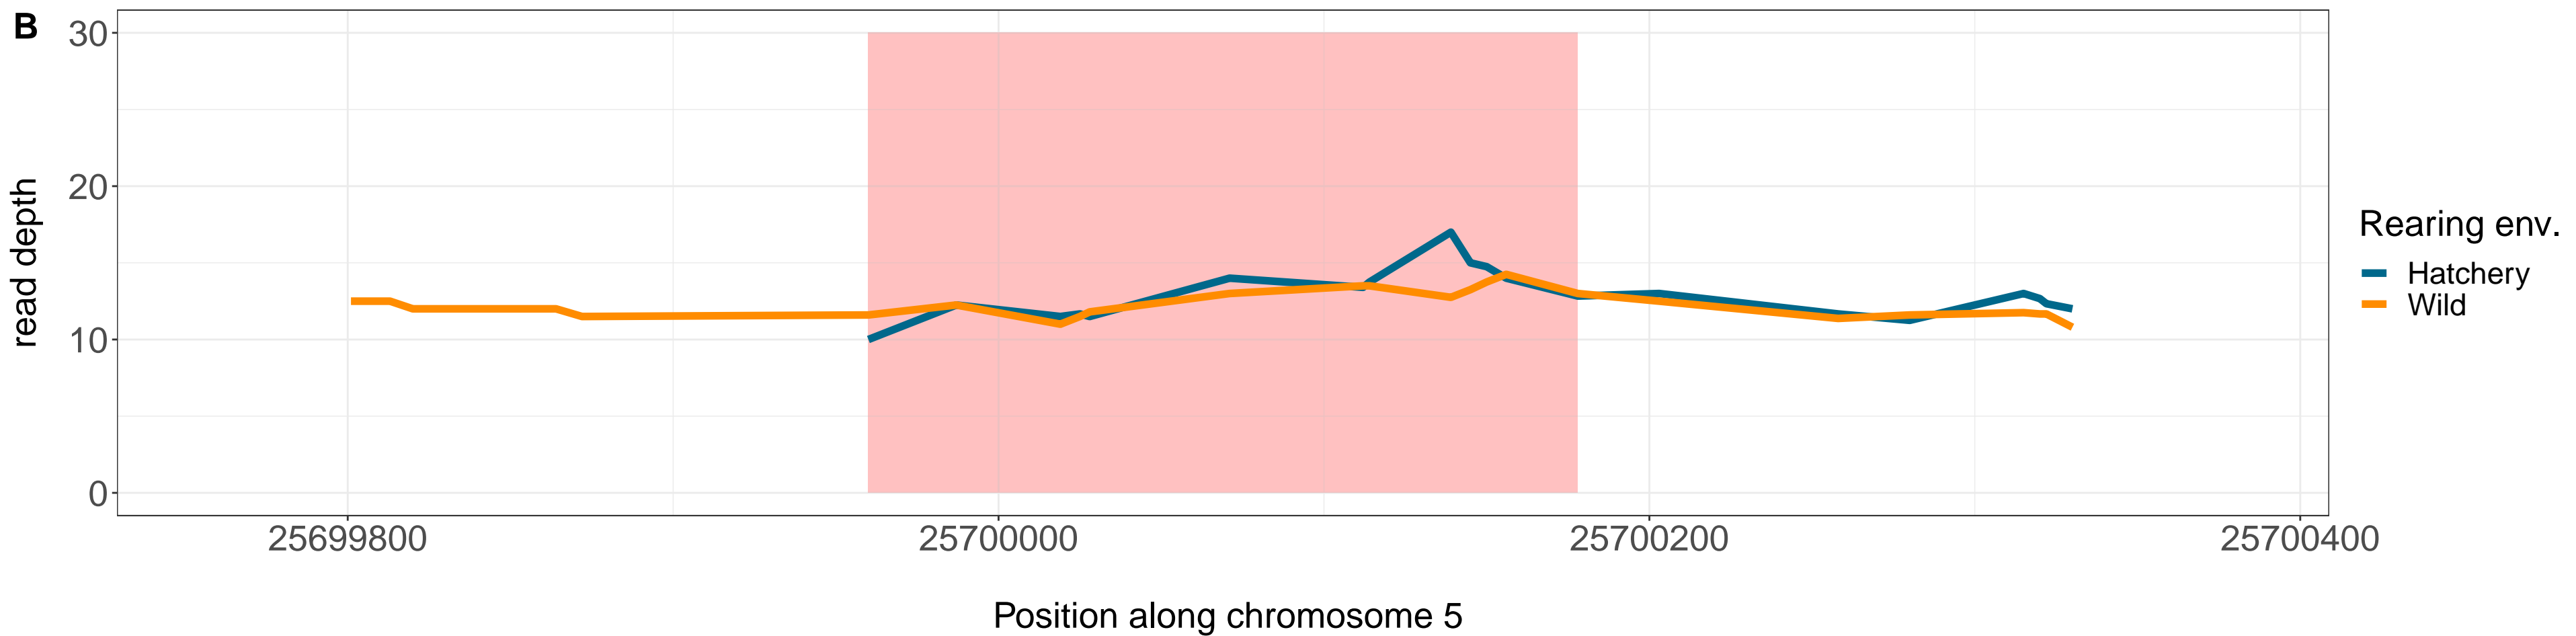

# DMR\_211

XM\_020485490.1

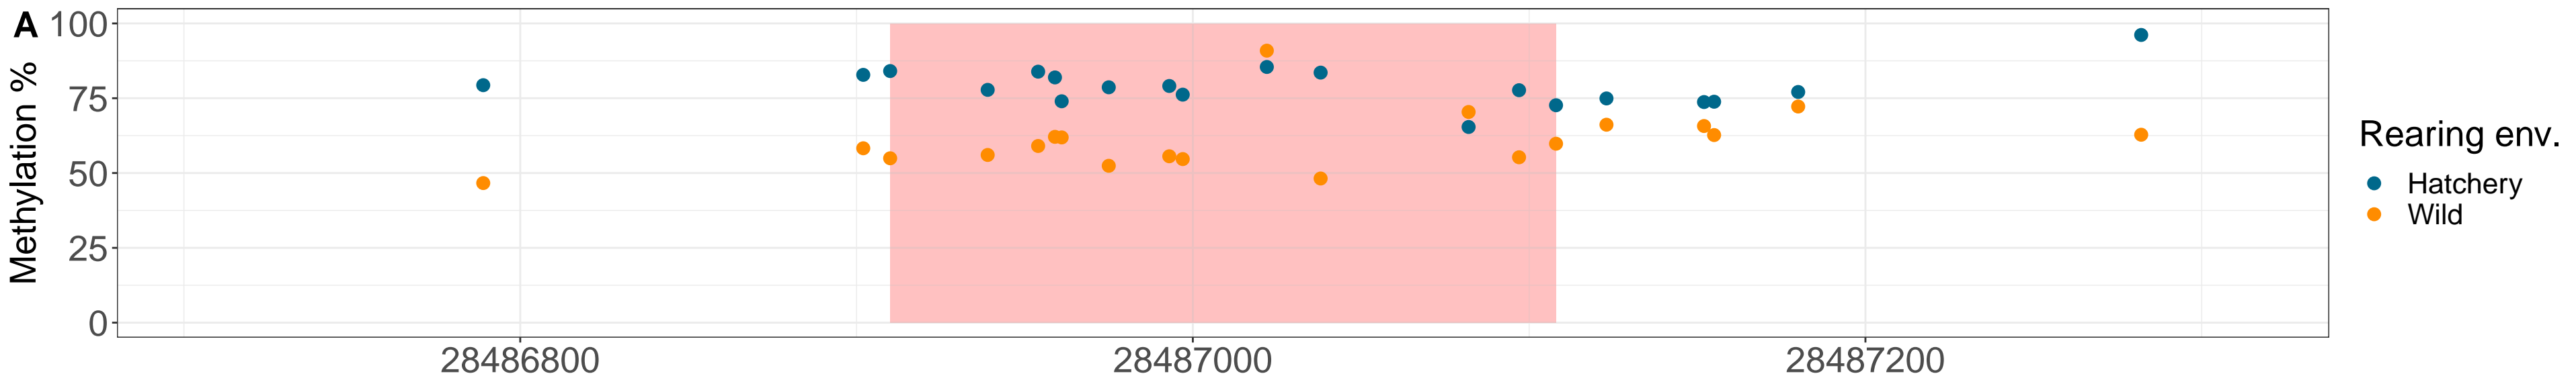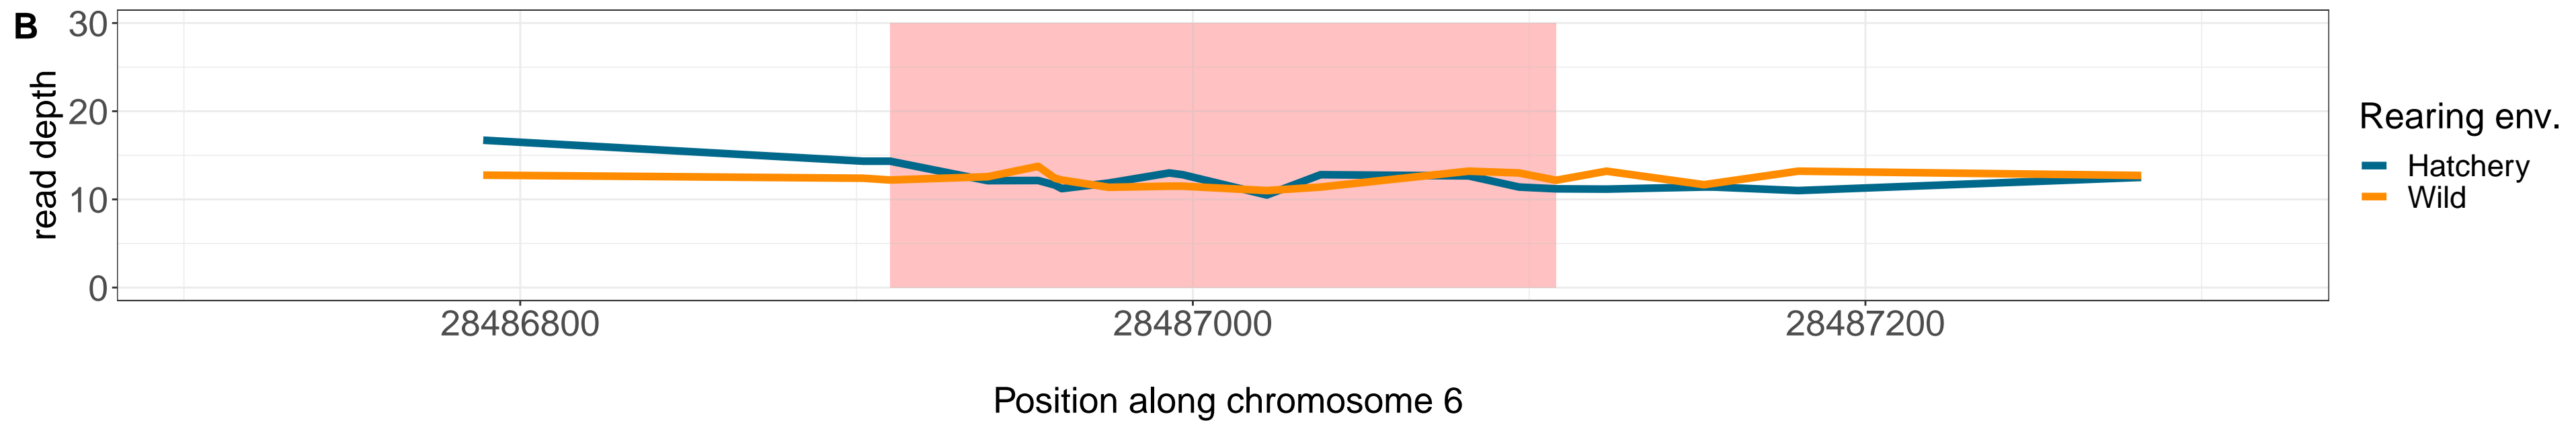

Position along chromosome 6
