# Supplementary material for: Epigenomic modifications induced by hatchery rearing persist in germ line cells of adult salmon after their oceanic migration
Source: PubMed Central journal article supplement (PMC8549618; doi:10.1111/eva.13235), 2021-05-04

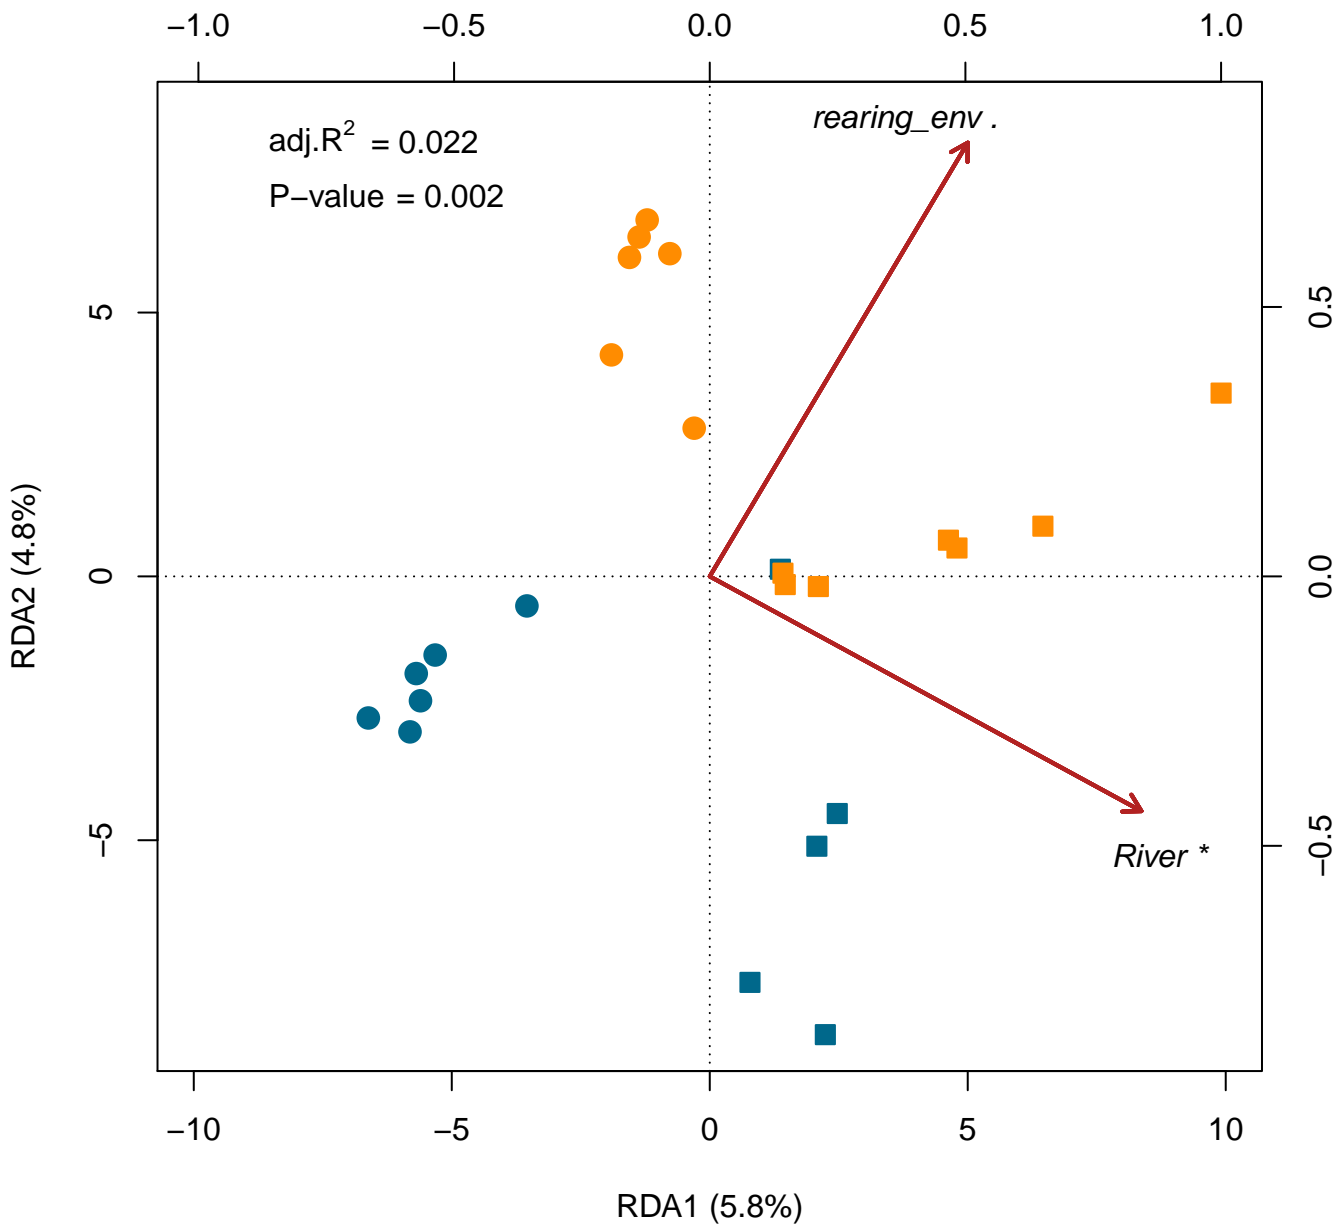

Supplement: EVA-14-2402-s005.pdf [file EVA-14-2402-s005.pdf]
